# Supplementary material for: Differential DNA methylation and expression of inflammatory and zinc transporter genes defines subgroups of osteoarthritic hip patients
Source: PubMed Central journal article supplement (PMC4552898; doi:10.1136/annrheumdis-2014-206752), 2015-04-08
Supplement: annrheumdis-2014-206752-s3.pdf [file annrheumdis-2014-206752-s3.pdf]

**Supplementary Table 1.** Patient information. OA = osteoarthritis, NOF = Neck of Femur.

| <b>Sample ID</b> | <b>Phenotype</b> | <b>Sex</b> | <b>Age at surgery (years)</b> | <b>Nucleic acid extracted</b> |
|------------------|------------------|------------|-------------------------------|-------------------------------|
| 3125             | OA               | M          | 74                            | DNA                           |
| 3417             | OA               | F          | 58                            | DNA                           |
| 3452             | OA               | F          | 69                            | DNA                           |
| 3727             | OA               | F          | 71                            | DNA + RNA                     |
| 3930             | OA               | M          | 66                            | DNA                           |
| 4263             | OA               | M          | 77                            | DNA                           |
| 4267             | OA               | M          | 85                            | DNA                           |
| 4290             | OA               | M          | 76                            | DNA + RNA                     |
| 4295             | OA               | F          | 68                            | DNA                           |
| 4337             | OA               | F          | 76                            | DNA + RNA                     |
| 4428             | OA               | M          | 59                            | DNA + RNA                     |
| 4479             | OA               | F          | 76                            | DNA                           |
| 4485             | OA               | M          | 48                            | DNA + RNA                     |
| 4486             | OA               | F          | 59                            | DNA + RNA                     |
| 4490             | OA               | M          | 90                            | DNA + RNA                     |
| 4491             | OA               | F          | 52                            | DNA + RNA                     |
| 4631             | OA               | F          | 73                            | DNA + RNA                     |
| 4663             | OA               | F          | 57                            | DNA                           |
| 4705             | OA               | M          | 69                            | DNA                           |
| 4713             | OA               | F          | 45                            | DNA                           |
| 4758             | OA               | F          | 72                            | DNA                           |
| 4791             | OA               | M          | 66                            | DNA + RNA                     |
| 4841             | OA               | F          | 71                            | DNA + RNA                     |
| T005             | NOF              | M          | 69                            | DNA                           |
| T007             | NOF              | F          | 72                            | DNA                           |
| T016             | NOF              | F          | 79                            | DNA + RNA                     |
| T023             | NOF              | F          | 68                            | DNA                           |
| T028             | NOF              | F          | 86                            | DNA                           |
| T034             | NOF              | F          | 91                            | DNA                           |
| T036             | NOF              | F          | 80                            | DNA                           |
| T039             | NOF              | F          | 80                            | DNA + RNA                     |
| T059             | NOF              | F          | 82                            | DNA                           |
| T076             | NOF              | M          | 81                            | DNA                           |
| T094             | NOF              | F          | 63                            | DNA                           |
| T107             | NOF              | M          | 72                            | DNA                           |
| T117             | NOF              | M          | 85                            | DNA + RNA                     |
| T123             | NOF              | F          | 78                            | DNA                           |
| T126             | NOF              | M          | 74                            | DNA                           |
| T132             | NOF              | M          | 84                            | DNA                           |
| T138             | NOF              | F          | 93                            | DNA + RNA                     |

|      |     |   |    |     |
|------|-----|---|----|-----|
| T141 | NOF | F | 84 | DNA |
| T142 | NOF | F | 78 | DNA |
| T144 | NOF | M | 75 | DNA |
| T145 | NOF | F | 83 | DNA |
