# Supplementary material for: Differential DNA methylation and expression of inflammatory and zinc transporter genes defines subgroups of osteoarthritic hip patients
Source: PubMed Central journal article supplement (PMC4552898; doi:10.1136/annrheumdis-2014-206752), 2015-04-08
Supplement: annrheumdis-2014-206752-s4.pdf [file annrheumdis-2014-206752-s4.pdf]

**Supplementary Table 10.** Correlation between gene expression and methylation within the gene bodies of *ZIP4*, *ZIP7*, *ZIP11* and *ZIP14*. Scatter plots of the correlations below are shown in Supplementary Figure 4.

| <b>Gene</b>  | <b>CpG probe ID</b> | <b>Spearman correlation</b> | <b>p value</b> |
|--------------|---------------------|-----------------------------|----------------|
| <i>ZIP4</i>  | cg22059438          | 0.54                        | 0.031          |
| <i>ZIP7</i>  | cg26750489          | 0.54                        | 0.031          |
|              | cg25059165          | 0.65                        | 0.0064         |
|              | cg02362439          | 0.70                        | 0.0025         |
| <i>ZIP11</i> | cg25067702          | -0.38                       | 0.15           |
|              | cg11761483          | -0.03                       | 0.91           |
|              | cg21461745          | 0.56                        | 0.024          |
| <i>ZIP14</i> | cg24136932          | 0.58                        | 0.019          |
