# Supplementary material for: Differential DNA methylation and expression of inflammatory and zinc transporter genes defines subgroups of osteoarthritic hip patients
Source: PubMed Central journal article supplement (PMC4552898; doi:10.1136/annrheumdis-2014-206752), 2015-04-08
Supplement: annrheumdis-2014-206752-s6.pdf [file annrheumdis-2014-206752-s6.pdf]

**Supplementary Table 2.** Primer sequences used in this study, all primer sets were used for measuring gene expression by real-time PCR using SYBR® green chemistry.

| <b>Gene</b>  | <b>Primer sequence</b>                                                |
|--------------|-----------------------------------------------------------------------|
| <i>CCL2</i>  | F – 5' GGTACATCCTCGACGGCATCT 3'<br>R – 5' GTGCCTCTTTGCTGCTTTCAC 3'    |
| <i>CCL5</i>  | F – 5' CCCTCGCTGTCATCCTCAT 3'<br>R – 5' AGTGGCGGGCAATGTA 3'           |
| <i>CXCR2</i> | F – 5' TCTGGATGCCACCGAGATTCT 3'<br>R – 5' AGTCCATGGCGAAACTTC 3'       |
| <i>IL6</i>   | F – 5' GGTACATCCTCGACGGCATCT 3'<br>R – 5' GTGCCTCTTTGCTGCTTTCAC 3'    |
| <i>IL1A</i>  | F – 5' AACCAGTGCTGCTGAAGGA 3'<br>R – 5' TTCTTAGTGCCGTGAGTTTCC 3'      |
| <i>IL1B</i>  | F – 5' CTGTCCTGCGTGTGAAAAGA 3'<br>R – 5' TTGGGTAATTTTGGGATCTACA 3'    |
| <i>TNF</i>   | F – 5' GGAGAAGGGTGACCGACTCA 3'<br>R – 5' CTGCCAGACTCGGCAA 3'          |
| <i>ZIP3</i>  | F – 5' TGGCCGAAACCATCCTCCT 3'<br>R – 5' GATCCGGCGTTGAAGGTCTC 3'       |
| <i>ZIP4</i>  | F – 5' ATGTCAGGAGCGGTCTTGC 3'<br>F – 5' GCTGCTGTGCTGCTGGAAC 3'        |
| <i>ZIP6</i>  | F – 5' TCTCTGTCACAAATCCCCTTCA 3'<br>R – 5' GATATTGCCGTGTGAAATTC 3'    |
| <i>ZIP7</i>  | F – 5' CCACAGGCACTACATGAAGA 3'<br>R – 5' CGTGATCGTGGTATGTCCAT 3'      |
| <i>ZIP8</i>  | F – 5' TGCTACCCAAATAACCAGCTCC 3'<br>R – 5' ACAGGAATCCATATCCCAAAC 3'   |
| <i>ZIP9</i>  | F – 5' TCTCTGGCTATGTTGGTGGGA 3'<br>R – 5' CCAGCACCCAAAACAGTCAC 3'     |
| <i>ZIP10</i> | F – 5' ACACCAGATTCTGACTGGCTT 3'<br>R – 5' TAGGAGGGGATTCTTGTGGC 3'     |
| <i>ZIP11</i> | F – 5' TGCTGGGACCTTCTTCAC 3'<br>R – 5' GCCAAGACTTCCATCTAAGATCC 3'     |
| <i>ZIP13</i> | F – 5' TCCTGGGTTCCCTCATGGT 3'<br>F – 5' AGATGCAGAAACACATTGCC 3'       |
| <i>ZIP14</i> | F – 5' CCTGAGGCTCAGCTTCATC 3'<br>R – 5' TCACCCTCGCCATAACCGAT 3'       |
| <i>ZNT1</i>  | F – 5' CCTCGCGTTAAGAGCACCC 3'<br>R – 5' CAATTCAGCCCGTTGGAGTT 3'       |
| <i>ZNT4</i>  | F – 5' GACCTAAGGCCATCATACTC 3'<br>F – 5' AGCTGACAAAACCTTAAGCG 3'      |
| <i>ZNT5</i>  | F – 5' ACCAAACACCAGTGGATCAAAA 3'<br>R – 5' CAGCAAAGTCCTTAGTGGTCC 3'   |
| <i>ZNT7</i>  | F – 5' GCTTAGGCTTGATTTCCGACT 3'<br>F – 5' CCAGAACTTCGGCTCTAACATAC 3'  |
| <i>ZNT9</i>  | F – 5' ACTGGAGTCAGAGCGATAAATGA 3'<br>R – 5' GCTTCCCAAACCTTCCAAAGAT 3' |
| <i>MTF1</i>  | F – 5' CGAAGGAGAAGCCATTTGAG 3'<br>R – 5' TGGCTTTCCCTGTATGAG 3'        |
| <i>MT1A</i>  | F – 5' GGCTCCTGCACCTGCACT 3'<br>F – 5' ACAGCAGCTGCACTTCTCTGA 3'       |
| <i>MT1G</i>  | F – 5' TCCTGCAAGTGCAAAGAGTG 3'<br>R – 5' CAGCTGCACTTCTCCGATG 3'       |
| <i>MT1H</i>  | F – 5' GCTCCTGCAAGTGCAAAAAG 3'<br>R – 5' CAGCAGCTGCACTTCTCTGA 3'      |
