# Supplementary material for: Differential DNA methylation and expression of inflammatory and zinc transporter genes defines subgroups of osteoarthritic hip patients
Source: PubMed Central journal article supplement (PMC4552898; doi:10.1136/annrheumdis-2014-206752), 2015-04-08
Supplement: annrheumdis-2014-206752-s7.pdf [file annrheumdis-2014-206752-s7.pdf]

**Supplementary Table 3.** List of hypomethylated DMLs in OA hip cluster 2.

| Hypomethylated in OA hip cluster 2 |          |     |            |                     |                          |                          |
|------------------------------------|----------|-----|------------|---------------------|--------------------------|--------------------------|
| Probe                              | Gene     | CHR | adj.P.Val  | mean $\beta$<br>NOF | mean $\beta$<br>cluster1 | mean $\beta$<br>cluster2 |
| cg00962147                         | A2BP1;A2 | 16  | 0.01146765 | 0.74233854          | 0.72978296               | 0.62903714               |
| cg00134295                         | A2M      | 12  | 0.0212437  | 0.66795941          | 0.68725407               | 0.52561437               |
| cg09866565                         | A4GNT    | 3   | 0.00685049 | 0.50443983          | 0.53497227               | 0.3295404                |
| cg02766259                         | AACS     | 12  | 0.00242331 | 0.80836793          | 0.79118933               | 0.68056551               |
| cg22081096                         | ABCA6;AE | 17  | 0.00091597 | 0.73285825          | 0.64688145               | 0.52608518               |
| cg25477497                         | ABCB1    | 7   | 0.01678444 | 0.71084022          | 0.80506795               | 0.60709541               |
| cg00355656                         | ABCB10   | 1   | 0.0231425  | 0.73818401          | 0.72218061               | 0.60104963               |
| cg09648454                         | ABCC12   | 16  | 0.00065949 | 0.5346487           | 0.36779996               | 0.26118054               |
| cg07861968                         | ABCC12;A | 16  | 0.00066232 | 0.86537473          | 0.80905814               | 0.69218839               |
| cg02672229                         | ABCC2    | 10  | 0.00576931 | 0.81955348          | 0.78788013               | 0.65213279               |
| cg25928474                         | ABCC3;AE | 17  | 0.00073118 | 0.87532619          | 0.80644979               | 0.63044963               |
| cg24260135                         | ABCC8    | 11  | 0.02536838 | 0.64618237          | 0.70666131               | 0.52930566               |
| cg05878073                         | ABCD4;AE | 14  | 0.01918451 | 0.31425431          | 0.36815468               | 0.19290274               |
| cg21052932                         | ABHD12B  | 14  | 0.00262855 | 0.56837298          | 0.57606229               | 0.41496463               |
| cg17941109                         | ABHD8    | 19  | 0.00073378 | 0.65760391          | 0.55598492               | 0.43715043               |
| cg26334023                         | ABI3;GNC | 17  | 0.00362629 | 0.6791491           | 0.67060615               | 0.52884351               |
| cg03471346                         | ABL2;ABL | 1   | 0.00131453 | 0.86957789          | 0.83165829               | 0.66986207               |
| cg17056676                         | ABLIM1;A | 10  | 0.00076471 | 0.52471204          | 0.44697031               | 0.32962932               |
| cg19676285                         | ABLIM2;A | 4   | 0.00072814 | 0.70752667          | 0.58643683               | 0.38095841               |
| cg00245502                         | ABLIM3   | 5   | 0.00661882 | 0.51080444          | 0.51479898               | 0.38908238               |
| cg11807006                         | ACAP1    | 17  | 0.00715821 | 0.48838767          | 0.46513975               | 0.34607663               |
| cg16927372                         | ACCN1    | 17  | 0.02649037 | 0.62063396          | 0.60561146               | 0.49847813               |
| cg04114655                         | ACCN4;AC | 2   | 0.00555886 | 0.52643316          | 0.48929914               | 0.38707368               |
| cg15736994                         | ACCN5    | 4   | 0.01518408 | 0.59169868          | 0.60745002               | 0.4871451                |
| cg06956006                         | ACLY;ACL | 17  | 0.00197515 | 0.89924724          | 0.85669951               | 0.73503052               |
| cg09636163                         | ACOXL;AC | 2   | 0.00745107 | 0.39366006          | 0.44664801               | 0.27882723               |
| cg24187645                         | ACPL2;AC | 3   | 0.00066232 | 0.60103443          | 0.5071725                | 0.36974085               |
| cg18733757                         | ACSL5;AC | 10  | 0.01980843 | 0.4488663           | 0.44045273               | 0.28329802               |
| cg04844987                         | ACSL5;AC | 10  | 0.01396719 | 0.46655208          | 0.48083693               | 0.323261                 |
| cg10078415                         | ACSM3;A  | 16  | 0.02003709 | 0.33618104          | 0.33613916               | 0.20173615               |
| cg16736889                         | ACSM5    | 16  | 0.00358002 | 0.78542874          | 0.75943897               | 0.65862684               |
| cg08734527                         | ACTL8    | 1   | 0.00247433 | 0.65991118          | 0.59026685               | 0.46178479               |
| cg03220543                         | ACTL8    | 1   | 0.00376781 | 0.54778592          | 0.56931347               | 0.41909398               |
| cg02057747                         | ACTN1;AC | 14  | 0.00359124 | 0.55809377          | 0.57315638               | 0.3770956                |
| cg26831416                         | ACTN4    | 19  | 0.00260155 | 0.76078557          | 0.71403228               | 0.51314317               |
| cg15211996                         | ACTRT2   | 1   | 0.01711555 | 0.69773105          | 0.68145669               | 0.54540549               |
| cg15342452                         | ADAM12;  | 10  | 0.00418936 | 0.85824268          | 0.8893625                | 0.75380099               |
| cg01368217                         | ADAM12;  | 10  | 0.00717683 | 0.81827033          | 0.78433169               | 0.67397272               |
| cg04834770                         | ADAM12;  | 10  | 0.01237591 | 0.75858155          | 0.73220216               | 0.55004785               |
| cg02235497                         | ADAM12;  | 10  | 0.00830789 | 0.85286154          | 0.82072073               | 0.70276232               |

|            |          |    |            |            |            |            |
|------------|----------|----|------------|------------|------------|------------|
| cg01823925 | ADAM19   | 5  | 0.00186306 | 0.78525944 | 0.75616812 | 0.65606074 |
| cg08295410 | ADAM19   | 5  | 0.00398606 | 0.8245932  | 0.80535189 | 0.6685688  |
| cg10852045 | ADAM32   | 8  | 0.01484626 | 0.79449217 | 0.80163298 | 0.61961288 |
| cg01181233 | ADAMDE   | 8  | 0.00160662 | 0.36480768 | 0.36037198 | 0.17286623 |
| cg27015773 | ADAMTS1  | 19 | 0.0009934  | 0.81990435 | 0.72521889 | 0.57791549 |
| cg07974833 | ADAMTSE  | 4  | 0.02630662 | 0.6249669  | 0.56736347 | 0.45502511 |
| cg03294207 | ADAMTSE  | 21 | 0.0008696  | 0.83588401 | 0.74904949 | 0.58244801 |
| cg00646084 | ADAMTSE  | 21 | 0.01183269 | 0.75273061 | 0.67707672 | 0.57269736 |
| cg14740657 | ADAMTSE  | 21 | 0.00209829 | 0.70276404 | 0.61365714 | 0.45647284 |
| cg21033632 | ADAMTSE  | 5  | 0.00436875 | 0.67915265 | 0.62521268 | 0.52211085 |
| cg16714091 | ADAMTSL  | 9  | 0.04180327 | 0.74811422 | 0.77490521 | 0.63458961 |
| cg22731190 | ADAMTSL  | 9  | 0.00349176 | 0.60420712 | 0.5587063  | 0.40796127 |
| cg02123534 | ADAP1    | 7  | 0.02697984 | 0.72943044 | 0.73570539 | 0.54779778 |
| cg03754605 | ADARB2   | 10 | 0.00109472 | 0.89901895 | 0.86206711 | 0.76142546 |
| cg08971562 | ADARB2   | 10 | 0.00725225 | 0.39350393 | 0.37623206 | 0.25353698 |
| cg04012681 | ADARB2   | 10 | 0.00131641 | 0.63706114 | 0.61161102 | 0.45993247 |
| cg02887530 | ADARB2   | 10 | 0.00315788 | 0.46163832 | 0.47035666 | 0.31263607 |
| cg11343713 | ADCY1    | 7  | 0.00425638 | 0.56566348 | 0.57828371 | 0.44729569 |
| cg16548911 | ADCY7    | 16 | 0.01645625 | 0.81519376 | 0.82120963 | 0.66968315 |
| cg10341242 | ADCY7    | 16 | 0.00775785 | 0.82254901 | 0.81664078 | 0.66097843 |
| cg07644321 | ADD1;AD  | 4  | 0.03060322 | 0.64536572 | 0.67228494 | 0.52365256 |
| cg12011299 | ADH4     | 4  | 0.01313275 | 0.55980874 | 0.59506924 | 0.36111017 |
| cg23328194 | ADRA1A;A | 8  | 0.00066204 | 0.67214367 | 0.56299442 | 0.38231661 |
| cg17979970 | ADRA1B   | 5  | 0.00552473 | 0.63128073 | 0.6315038  | 0.52379923 |
| cg00474091 | AEBP2;AE | 12 | 0.02156272 | 0.65052599 | 0.59120782 | 0.47303236 |
| cg13670531 | AFAP1L2; | 10 | 0.04104022 | 0.85044936 | 0.84108821 | 0.71476917 |
| cg22199080 | AGAP2    | 12 | 0.00780052 | 0.29293941 | 0.34827719 | 0.16444929 |
| cg21351392 | AGPAT4   | 6  | 0.00099652 | 0.82965    | 0.80616758 | 0.6601434  |
| cg01395754 | AGPS     | 2  | 0.01645394 | 0.72657616 | 0.71096597 | 0.56752244 |
| cg14252395 | AGRN     | 1  | 0.02683244 | 0.68703502 | 0.68207552 | 0.57452521 |
| cg24371033 | AGXT     | 2  | 0.00214604 | 0.31320579 | 0.27108041 | 0.1659865  |
| cg03822873 | AHCYL2;A | 7  | 0.00642585 | 0.67067578 | 0.72788861 | 0.51780815 |
| cg25272143 | AHNAK    | 11 | 0.02381973 | 0.32888894 | 0.2942107  | 0.18652959 |
| cg16509239 | AHNAK    | 11 | 0.0249821  | 0.40064422 | 0.37623816 | 0.26499996 |
| cg11138227 | AHNAK2   | 14 | 0.00593004 | 0.70044597 | 0.64392489 | 0.53389154 |
| cg01513078 | AHNAK2   | 14 | 0.0012071  | 0.5236927  | 0.40290125 | 0.2936353  |
| cg06799735 | AHNAK2   | 14 | 0.00065949 | 0.70805154 | 0.58450752 | 0.46528842 |
| cg23916896 | AHRR     | 5  | 0.00263648 | 0.72699011 | 0.73830569 | 0.48622151 |
| cg00490406 | AIM2     | 1  | 0.01974947 | 0.82539844 | 0.83550989 | 0.67026135 |
| cg21052656 | AIP      | 11 | 0.00911882 | 0.57335306 | 0.56620929 | 0.39987128 |
| cg21747271 | AIP      | 11 | 0.01361478 | 0.43842617 | 0.41682504 | 0.29336593 |
| cg05254518 | AKAP13;A | 15 | 0.00661882 | 0.55925207 | 0.59198655 | 0.35863344 |
| cg14003853 | AKAP13;A | 15 | 0.04406604 | 0.52410147 | 0.54337876 | 0.40038452 |
| cg11314684 | AKT3;AKT | 1  | 0.01473021 | 0.5730223  | 0.61921282 | 0.44801005 |
| cg06400255 | ALDOA    | 16 | 0.00178025 | 0.84731361 | 0.81964794 | 0.59150236 |
| cg04329347 | ALDOA    | 16 | 0.04292124 | 0.51851787 | 0.56368995 | 0.40371265 |

|            |           |    |            |            |            |            |
|------------|-----------|----|------------|------------|------------|------------|
| cg18780653 | ALG1L2    | 3  | 0.00552206 | 0.40954713 | 0.43956296 | 0.29133452 |
| cg05977776 | ALLC      | 2  | 0.002727   | 0.64069923 | 0.66450115 | 0.52240377 |
| cg13306478 | ALOX5AP   | 13 | 0.00073265 | 0.76222857 | 0.6614748  | 0.44866086 |
| cg12466599 | ALPL;ALPI | 1  | 0.00141412 | 0.72601437 | 0.70989237 | 0.56324065 |
| cg24722348 | ALPL;ALPI | 1  | 0.02846049 | 0.52061428 | 0.51725818 | 0.39902129 |
| cg16413687 | ALX1      | 12 | 0.00833663 | 0.7275089  | 0.70466094 | 0.58893105 |
| cg03781931 | ALX1      | 12 | 0.00223317 | 0.56202554 | 0.53283275 | 0.34341498 |
| cg06809252 | ALX3      | 1  | 0.00203482 | 0.60709158 | 0.55834132 | 0.45738104 |
| cg16360777 | AMBN      | 4  | 0.00159601 | 0.30854053 | 0.37290038 | 0.16910458 |
| cg13003878 | AMBP      | 9  | 0.03305949 | 0.73584023 | 0.77556659 | 0.62762532 |
| cg27137887 | AMBRA1    | 11 | 0.00215533 | 0.51824849 | 0.50987617 | 0.33405292 |
| cg24374161 | AMBRA1    | 11 | 0.00585298 | 0.51370813 | 0.50016637 | 0.25734204 |
| cg07376232 | AMICA1;A  | 11 | 0.01500741 | 0.59833921 | 0.65129238 | 0.49107344 |
| cg13751113 | AMICA1;A  | 11 | 0.01040861 | 0.6017863  | 0.64062162 | 0.47970661 |
| cg23092449 | AMPH;AN   | 7  | 0.00132756 | 0.43374692 | 0.42048468 | 0.272363   |
| cg21823502 | ANAPC11   | 17 | 0.00197576 | 0.7978189  | 0.74957488 | 0.63977931 |
| cg09396217 | ANGPT1    | 8  | 0.02252087 | 0.52770636 | 0.53969422 | 0.37561997 |
| cg27616227 | ANGPT1    | 8  | 0.00195832 | 0.63630751 | 0.62403998 | 0.40008498 |
| cg02402368 | ANGPT2;A  | 8  | 0.00499799 | 0.30354697 | 0.2923464  | 0.18457255 |
| cg21193744 | ANGPT2;A  | 8  | 0.00092643 | 0.63206501 | 0.50541031 | 0.39154431 |
| cg08521995 | ANK1;ANI  | 8  | 0.00065949 | 0.69047802 | 0.52208998 | 0.3362733  |
| cg22164298 | ANK2;ANI  | 4  | 0.01501672 | 0.79911638 | 0.85614143 | 0.65059601 |
| cg14011971 | ANK3      | 10 | 0.0249821  | 0.49667349 | 0.4752203  | 0.35802838 |
| cg26110900 | ANK3      | 10 | 0.00104778 | 0.78873934 | 0.7343917  | 0.59686937 |
| cg23075597 | ANKLE2    | 12 | 0.0068559  | 0.82929529 | 0.92275337 | 0.6782925  |
| cg24065504 | ANKRD22   | 10 | 0.00219431 | 0.61126918 | 0.56278678 | 0.41917749 |
| cg01442620 | ANKRD27   | 19 | 0.00956928 | 0.64511324 | 0.6447717  | 0.46015169 |
| cg13941760 | ANKRD44   | 2  | 0.01742221 | 0.54799324 | 0.63897069 | 0.43719627 |
| cg00794673 | ANKS1A    | 6  | 0.00288962 | 0.72901185 | 0.70559601 | 0.46496535 |
| cg26401673 | ANO10     | 3  | 0.00653182 | 0.78816654 | 0.82040894 | 0.63590771 |
| cg02278646 | ANO6;AN   | 12 | 0.01994073 | 0.61741678 | 0.63332379 | 0.44284391 |
| cg20366110 | ANXA13;A  | 8  | 0.0035878  | 0.59832847 | 0.64265431 | 0.44940748 |
| cg19130824 | ANXA5     | 4  | 0.00124521 | 0.77277058 | 0.75814399 | 0.65395055 |
| cg02415661 | AP1M1;A   | 19 | 0.0029234  | 0.69853382 | 0.64348231 | 0.4590827  |
| cg19175742 | AP3B2     | 15 | 0.00441677 | 0.55988023 | 0.55688041 | 0.44840773 |
| cg23007087 | AP3S2;AP  | 15 | 0.00728372 | 0.76980192 | 0.73035476 | 0.60803918 |
| cg02349866 | AP3S2;AP  | 15 | 0.00066204 | 0.81318675 | 0.76010607 | 0.50207963 |
| cg06970472 | APBB2;AF  | 4  | 0.00219711 | 0.3474183  | 0.34141218 | 0.21543118 |
| cg14290210 | APBB2;AF  | 4  | 0.00713936 | 0.80153548 | 0.80545052 | 0.63106542 |
| cg25354657 | APLP2;AP  | 11 | 0.00081925 | 0.87090491 | 0.80313488 | 0.68174949 |
| cg23729763 | APLP2;AP  | 11 | 0.00073118 | 0.68360866 | 0.56327358 | 0.35108311 |
| cg24360617 | APOBEC3   | 22 | 0.00670577 | 0.37638144 | 0.38590549 | 0.2532536  |
| cg10316474 | APOBEC3   | 22 | 0.00456818 | 0.25302481 | 0.25484337 | 0.14853278 |
| cg16066354 | APOBEC3   | 22 | 0.00115308 | 0.34457145 | 0.29212936 | 0.15159788 |
| cg11911305 | APOC1P1   | 19 | 0.01670995 | 0.58037434 | 0.60168151 | 0.42840831 |
| cg26758857 | APOL1;AF  | 22 | 0.00322924 | 0.31972347 | 0.34001166 | 0.1774538  |

|            |          |    |            |            |            |            |
|------------|----------|----|------------|------------|------------|------------|
| cg07713361 | APOL1;AF | 22 | 0.00228672 | 0.41393056 | 0.32705419 | 0.17794996 |
| cg09432376 | APOL6    | 22 | 0.0075368  | 0.68559853 | 0.66196218 | 0.4822253  |
| cg14690065 | APOL6    | 22 | 0.00272772 | 0.62475895 | 0.56798288 | 0.41166809 |
| cg20176648 | AQP1     | 7  | 0.00339981 | 0.40149496 | 0.39359237 | 0.28508806 |
| cg00622010 | AQP1     | 7  | 0.00088355 | 0.67530026 | 0.66753754 | 0.54911524 |
| cg09676669 | AQP1     | 7  | 0.00283173 | 0.4199709  | 0.39530621 | 0.21826761 |
| cg15373767 | AQP1     | 7  | 0.00196226 | 0.51925991 | 0.47588288 | 0.28444788 |
| cg04372674 | AQP1     | 7  | 0.00245414 | 0.67250003 | 0.64007738 | 0.3753617  |
| cg25075794 | AQP1     | 7  | 0.0034485  | 0.66866969 | 0.65385355 | 0.39642765 |
| cg25230363 | AQP1     | 7  | 0.00219764 | 0.63803611 | 0.60703855 | 0.38902794 |
| cg26923410 | AQP1     | 7  | 0.00412512 | 0.35804491 | 0.33012648 | 0.21202903 |
| cg07135629 | AQP1     | 7  | 0.00073378 | 0.8696467  | 0.7859498  | 0.66170115 |
| cg10132917 | AQP1     | 7  | 0.00065949 | 0.85689903 | 0.76952566 | 0.63742642 |
| cg18307978 | AQP1     | 7  | 0.00081413 | 0.75957295 | 0.69122747 | 0.47524506 |
| cg18080604 | AQP1;AQ  | 7  | 0.00620309 | 0.34296544 | 0.34116162 | 0.20956758 |
| cg11827925 | AQP1;AQ  | 7  | 0.00534171 | 0.58495961 | 0.57662104 | 0.39220472 |
| cg00729275 | AQP4;C18 | 18 | 0.04018123 | 0.67869433 | 0.61523749 | 0.51312072 |
| cg11752250 | ARG2     | 14 | 0.02248036 | 0.63899333 | 0.60319145 | 0.45150599 |
| cg03206044 | ARHGAP1  | 4  | 0.00297897 | 0.61909333 | 0.56828396 | 0.4438549  |
| cg01782668 | ARHGAP1  | 4  | 0.00128378 | 0.89126896 | 0.81577655 | 0.69953867 |
| cg24506434 | ARHGAP2  | 10 | 0.00065949 | 0.77104008 | 0.60153582 | 0.48875261 |
| cg22184990 | ARHGAP2  | 5  | 0.00753573 | 0.80339074 | 0.82366996 | 0.66552426 |
| cg14555350 | ARHGAP2  | 5  | 0.00073265 | 0.87430358 | 0.82394375 | 0.71883971 |
| cg20917083 | ARHGDIB  | 12 | 0.01245683 | 0.42155855 | 0.44387394 | 0.28056728 |
| cg11806633 | ARHGEF1  | 1  | 0.01820811 | 0.72478026 | 0.75172372 | 0.62231194 |
| cg07233343 | ARHGEF1  | 1  | 0.00129758 | 0.71014415 | 0.62094994 | 0.48672483 |
| cg22524332 | ARHGEF1  | 1  | 0.00079133 | 0.79120551 | 0.67804716 | 0.55778508 |
| cg02731917 | ARHGEF1  | 1  | 0.00677233 | 0.8359148  | 0.80351271 | 0.7006396  |
| cg11229273 | ARHGEF3  | 3  | 0.00107266 | 0.51804069 | 0.33831701 | 0.20161285 |
| cg21077300 | ARHGEF3  | 3  | 0.01257717 | 0.35079681 | 0.35693996 | 0.24985282 |
| cg25799109 | ARHGEF3  | 3  | 0.00181386 | 0.28803525 | 0.27569187 | 0.12797056 |
| cg14446494 | ARHGEF4  | 2  | 0.00499799 | 0.71055104 | 0.69450433 | 0.58096843 |
| cg18754629 | ARHGEF4  | 2  | 0.00119376 | 0.55787378 | 0.5543288  | 0.43284049 |
| cg18973247 | ARID1A;A | 1  | 0.00089205 | 0.33893777 | 0.25389914 | 0.12849562 |
| cg24495062 | ARID5B   | 10 | 0.00297897 | 0.61580113 | 0.57911121 | 0.46370467 |
| cg18522931 | ARID5B   | 10 | 0.036396   | 0.73379917 | 0.75494917 | 0.56301424 |
| cg11287647 | ARL4A;AR | 7  | 0.00549982 | 0.47350179 | 0.4835921  | 0.28596015 |
| cg05204104 | ARL4C;AR | 2  | 0.00803433 | 0.6817276  | 0.68416818 | 0.49903055 |
| cg15016771 | ARL4C;AR | 2  | 0.0012838  | 0.2910003  | 0.31688033 | 0.17336109 |
| cg06795960 | ARL4D    | 17 | 0.01237894 | 0.72209082 | 0.70550449 | 0.60389457 |
| cg04642300 | ARMC2    | 6  | 0.01823439 | 0.40849852 | 0.45295615 | 0.26810795 |
| cg20057782 | ARMC4    | 10 | 0.02528265 | 0.35667758 | 0.36163144 | 0.2549997  |
| cg01446731 | ARNT2    | 15 | 0.00073118 | 0.69523122 | 0.4624446  | 0.3442512  |
| cg19708986 | ARNT2    | 15 | 0.00112679 | 0.72852597 | 0.69752502 | 0.55867845 |
| cg26165146 | ARNTL2   | 12 | 0.00661882 | 0.88463544 | 0.83005417 | 0.7171228  |
| cg21756647 | ARRB1;AF | 11 | 0.00065949 | 0.60977999 | 0.48104005 | 0.34536438 |

|             |           |    |            |            |            |            |
|-------------|-----------|----|------------|------------|------------|------------|
| cg00970435  | ARSG      | 17 | 0.00264473 | 0.5774576  | 0.54326376 | 0.2991214  |
| cg17918314  | ARTN;ART  | 1  | 0.00177922 | 0.46912961 | 0.47346165 | 0.35701531 |
| cg00013804  | ASAP2;AS  | 2  | 0.00073118 | 0.86768221 | 0.79311448 | 0.61894381 |
| cg17056069  | ASAP2;AS  | 2  | 0.02450621 | 0.75283993 | 0.85152813 | 0.62356694 |
| cg23902076  | ASAP2;AS  | 2  | 0.00065949 | 0.88303947 | 0.7859464  | 0.64446558 |
| cg18008487  | ASB4;ASB  | 7  | 0.02792018 | 0.59288036 | 0.59910739 | 0.45455153 |
| cg14516287  | ASTN2;AS  | 9  | 0.02329073 | 0.60964954 | 0.62439877 | 0.45781813 |
| cg07676329  | ATCAY     | 19 | 0.00206218 | 0.41566121 | 0.41738529 | 0.31524648 |
| cg03293837  | ATE1;ATE  | 10 | 0.02346046 | 0.79332924 | 0.8492758  | 0.67023873 |
| cg00458449  | ATG4B;AT  | 2  | 0.00297897 | 0.7906857  | 0.80746984 | 0.58040185 |
| cg06956052  | ATP1A4    | 1  | 0.00065949 | 0.49734984 | 0.42858022 | 0.32422231 |
| cg05299486  | ATP6V0A:  | 17 | 0.02152957 | 0.49590022 | 0.56958252 | 0.38593743 |
| cg07554478  | ATP6V1A   | 3  | 0.00798815 | 0.75681784 | 0.73443375 | 0.59907246 |
| cg12384004  | ATP8A2    | 13 | 0.0294913  | 0.60441294 | 0.72238276 | 0.4998779  |
| cg05868813  | ATP8A2    | 13 | 0.00687165 | 0.76229098 | 0.76726592 | 0.63291307 |
| cg20663852  | ATP9A     | 20 | 0.00725225 | 0.54027759 | 0.51437498 | 0.32585029 |
| cg07339236  | ATP9A     | 20 | 0.01387472 | 0.76426001 | 0.81908028 | 0.64869167 |
| cg22274117  | ATXN1;AT  | 6  | 0.00279494 | 0.64274654 | 0.60082733 | 0.34874592 |
| cg07932199  | ATXN2     | 12 | 0.01096214 | 0.34716626 | 0.37196758 | 0.21792767 |
| cg21557473  | AUTS2;AL  | 7  | 0.01580869 | 0.80261497 | 0.85063843 | 0.68746372 |
| cg04046364  | AVIL      | 12 | 0.00288962 | 0.36770223 | 0.30974583 | 0.18050156 |
| cg24123679  | AZU1      | 19 | 0.00936413 | 0.42485624 | 0.46330612 | 0.31798679 |
| cg10752406  | AZU1      | 19 | 0.00820352 | 0.47898077 | 0.48342809 | 0.35331375 |
| cg15610437  | AZU1      | 19 | 0.04407901 | 0.58103259 | 0.5948085  | 0.4740462  |
| cg26390598  | B3GALT5;  | 21 | 0.02348349 | 0.37434796 | 0.41595508 | 0.25762816 |
| cg22212839  | B3GAT1;E  | 11 | 0.01717855 | 0.57735669 | 0.56580458 | 0.42599716 |
| cg24391854  | B3GAT1;E  | 11 | 0.04433808 | 0.72041631 | 0.75379019 | 0.61529492 |
| cg13567349  | B3GAT1;E  | 11 | 0.00244887 | 0.64225287 | 0.61299438 | 0.48362031 |
| cg27121870  | B3GAT1;E  | 11 | 0.00575746 | 0.61902033 | 0.60667699 | 0.37650055 |
| cg25521400  | B3GNT2    | 2  | 0.02691069 | 0.57376946 | 0.55302963 | 0.41176807 |
| cg111115976 | B3GNTL1   | 17 | 0.04884648 | 0.90077493 | 0.89826019 | 0.79314595 |
| cg17486314  | BACH2;B/  | 6  | 0.00176085 | 0.55468517 | 0.51751686 | 0.33974239 |
| cg01303372  | BAG3      | 10 | 0.03960534 | 0.38356404 | 0.38404293 | 0.24374911 |
| cg01810575  | BAHCC1    | 17 | 0.01860545 | 0.61978626 | 0.63949217 | 0.51044672 |
| cg13739640  | BAIAP2;B/ | 17 | 0.02047468 | 0.79993095 | 0.85762918 | 0.68958393 |
| cg27551910  | BAIAP2;B/ | 17 | 0.04006803 | 0.60059051 | 0.62166768 | 0.49865632 |
| cg14374754  | BARX1     | 9  | 0.00758031 | 0.67987545 | 0.62953338 | 0.38146624 |
| cg22902266  | BARX1     | 9  | 0.0015244  | 0.67080207 | 0.57306225 | 0.35686968 |
| cg07355688  | BARX2     | 11 | 0.00757575 | 0.38085592 | 0.37519335 | 0.27118039 |
| cg11854007  | BASE      | 20 | 0.04358513 | 0.42629385 | 0.43782976 | 0.29201766 |
| cg16281534  | BASP1     | 5  | 0.00197986 | 0.7100415  | 0.70906623 | 0.52500081 |
| cg04536765  | BAT3;BAT  | 6  | 0.00240796 | 0.82313743 | 0.7863145  | 0.6436974  |
| cg27014438  | BAT3;BAT  | 6  | 0.00144365 | 0.38885964 | 0.24361182 | 0.13900945 |
| cg22161706  | BBS9;BBS  | 7  | 0.00130049 | 0.90968787 | 0.87527196 | 0.75505547 |
| cg24965479  | BCAS3;BC  | 17 | 0.00742728 | 0.45010339 | 0.4096588  | 0.21922418 |
| cg22214889  | BCAS4;BC  | 20 | 0.0011104  | 0.31417514 | 0.29807383 | 0.17268931 |

|            |           |    |            |            |            |            |
|------------|-----------|----|------------|------------|------------|------------|
| cg24244747 | BCKDHB;F  | 6  | 0.00232154 | 0.77285938 | 0.79154922 | 0.55916844 |
| cg01636910 | BCL10     | 1  | 0.01663906 | 0.731044   | 0.74572872 | 0.58203074 |
| cg17935536 | BCL11A;B  | 2  | 0.01842786 | 0.64823351 | 0.68152028 | 0.52156086 |
| cg13758331 | BCL2L11;I | 2  | 0.01264372 | 0.46543997 | 0.45925785 | 0.29031102 |
| cg27087650 | BCL3      | 19 | 0.00490166 | 0.58525516 | 0.52759136 | 0.38071817 |
| cg09643398 | BCL6;BCL  | 3  | 0.02336655 | 0.73405783 | 0.71435833 | 0.60338238 |
| cg10020892 | BCL9      | 1  | 0.036552   | 0.56427006 | 0.57714287 | 0.41608098 |
| cg00919591 | BCR;BCR   | 22 | 0.0107931  | 0.55798233 | 0.59484734 | 0.36985141 |
| cg13521842 | BEGAIN    | 14 | 0.00570746 | 0.33317837 | 0.33438147 | 0.21601451 |
| cg09970511 | BEND6     | 6  | 0.00076471 | 0.75749498 | 0.62529706 | 0.52076768 |
| cg00658449 | BEYLA;BE  | 8  | 0.00442269 | 0.47969271 | 0.43029853 | 0.31150811 |
| cg11519176 | BGLAP     | 1  | 0.01546058 | 0.72291843 | 0.74022076 | 0.56850256 |
| cg23729443 | BGLAP     | 1  | 0.00491882 | 0.41125086 | 0.41252251 | 0.25261016 |
| cg09996284 | BGLAP     | 1  | 0.0046471  | 0.66372156 | 0.64370122 | 0.47632143 |
| cg08466030 | BICC1     | 10 | 0.00132756 | 0.88158084 | 0.86794119 | 0.73072655 |
| cg22641201 | BICC1     | 10 | 0.00961487 | 0.47215459 | 0.42243313 | 0.26161674 |
| cg12342675 | BICC1     | 10 | 0.00366179 | 0.87627663 | 0.88737015 | 0.77207337 |
| cg24890964 | BLCAP;BL  | 20 | 0.00311547 | 0.67149194 | 0.64154234 | 0.48406738 |
| cg08901339 | BLNK;BLN  | 10 | 0.02649037 | 0.57977153 | 0.57519076 | 0.45137266 |
| cg04937184 | BMP4;BM   | 14 | 0.00318584 | 0.50743932 | 0.48334922 | 0.35528847 |
| cg09807875 | BMPEP     | 7  | 0.00084118 | 0.53487819 | 0.38454412 | 0.25466785 |
| cg06024391 | BPGM;BP   | 7  | 0.00126466 | 0.84018261 | 0.80794268 | 0.65976502 |
| cg02983911 | BPI       | 20 | 0.01507976 | 0.79159177 | 0.78274223 | 0.66192685 |
| cg26534847 | BPI       | 20 | 0.01077982 | 0.53923596 | 0.4878851  | 0.30587556 |
| cg16451371 | BPIL2     | 22 | 0.01011462 | 0.46287895 | 0.50599094 | 0.35448586 |
| cg16185457 | BRE;BRE;I | 2  | 0.00521564 | 0.87694077 | 0.87515857 | 0.72564901 |
| cg17416644 | BRSK2     | 11 | 0.01870855 | 0.36900284 | 0.34725055 | 0.24520113 |
| cg20092122 | BST2      | 19 | 0.00076471 | 0.38225158 | 0.28790512 | 0.11657735 |
| cg03505817 | BTBD7     | 14 | 0.00337719 | 0.83255868 | 0.81791866 | 0.68063554 |
| cg22198603 | BTBD9;BT  | 6  | 0.01206219 | 0.7462964  | 0.77163424 | 0.6055132  |
| cg22690339 | BTBD9;BT  | 6  | 0.03033692 | 0.56318691 | 0.49926252 | 0.37513944 |
| cg12238593 | BTN3A3;E  | 6  | 0.01426008 | 0.68678989 | 0.61959172 | 0.51452368 |
| cg08754149 | C10orf11  | 10 | 0.00122881 | 0.85272256 | 0.81916788 | 0.7107117  |
| cg03936104 | C10orf41; | 10 | 0.00349377 | 0.66871913 | 0.5976756  | 0.39340597 |
| cg10627429 | C10orf81  | 10 | 0.00126804 | 0.75650154 | 0.69650503 | 0.5777335  |
| cg11204562 | C10orf81  | 10 | 0.00071094 | 0.89649553 | 0.83977099 | 0.71752838 |
| cg15834395 | C10orf91  | 10 | 0.01011462 | 0.55190781 | 0.59482861 | 0.42093795 |
| cg08200419 | C10orf91  | 10 | 0.04868581 | 0.69212826 | 0.69499452 | 0.56393131 |
| cg15818008 | C11orf34  | 11 | 0.01020581 | 0.61273988 | 0.64821228 | 0.40681857 |
| cg12490907 | C11orf41  | 11 | 0.00704684 | 0.56579255 | 0.65269438 | 0.41562923 |
| cg07188648 | C11orf88; | 11 | 0.00291636 | 0.49438523 | 0.47284491 | 0.28548883 |
| cg03132202 | C12orf56; | 12 | 0.00820128 | 0.39370859 | 0.43839852 | 0.28573997 |
| cg02873991 | C12orf77  | 12 | 0.03532942 | 0.55975129 | 0.54783606 | 0.3899065  |
| cg09166410 | C13orf16  | 13 | 0.00122881 | 0.58253756 | 0.5417793  | 0.37991532 |
| cg08990474 | C13orf35  | 13 | 0.04967107 | 0.73512054 | 0.77681049 | 0.62887439 |
| cg24169915 | C14orf17  | 14 | 0.00287155 | 0.36558335 | 0.41456543 | 0.23031298 |

|            |           |    |            |            |            |            |
|------------|-----------|----|------------|------------|------------|------------|
| cg18709904 | C14orf18: | 14 | 0.02712361 | 0.65199223 | 0.82601497 | 0.45272342 |
| cg00859280 | C14orf70  | 14 | 0.00144775 | 0.24547231 | 0.22325091 | 0.12320716 |
| cg03565081 | C14orf93; | 14 | 0.04980289 | 0.46988978 | 0.5013159  | 0.36162026 |
| cg08274633 | C15orf53  | 15 | 0.04953247 | 0.78503469 | 0.75134842 | 0.63233736 |
| cg20678353 | C15orf53  | 15 | 0.04357378 | 0.34257015 | 0.31297632 | 0.18837123 |
| cg12609829 | C15orf53  | 15 | 0.00509504 | 0.80219486 | 0.79058    | 0.54791815 |
| cg27129984 | C16orf38  | 16 | 0.01994073 | 0.44096108 | 0.45899917 | 0.33587402 |
| cg02319067 | C16orf54  | 16 | 0.0093099  | 0.48255893 | 0.52020271 | 0.32217499 |
| cg26285698 | C16orf54; | 16 | 0.01678444 | 0.43530529 | 0.43706198 | 0.30407442 |
| cg09944012 | C17orf10: | 17 | 0.00908203 | 0.84940294 | 0.82213227 | 0.72013419 |
| cg25490145 | C17orf10: | 17 | 0.01414127 | 0.77029821 | 0.78717225 | 0.667714   |
| cg21465176 | C17orf10: | 17 | 0.02077264 | 0.74332464 | 0.76147424 | 0.64007843 |
| cg21683390 | C18orf1;C | 18 | 0.03488893 | 0.57504033 | 0.56294257 | 0.43092066 |
| cg27638057 | C18orf45  | 18 | 0.00073118 | 0.74204691 | 0.63827619 | 0.48124719 |
| cg12571879 | C19orf59; | 19 | 0.01645625 | 0.56960132 | 0.58141189 | 0.41429508 |
| cg16385583 | C1orf150  | 1  | 0.01672645 | 0.62975938 | 0.68858391 | 0.48106897 |
| cg17518550 | C1orf150  | 1  | 0.03358212 | 0.63560822 | 0.6752687  | 0.53141686 |
| cg19375403 | C1orf174  | 1  | 0.02231558 | 0.71031655 | 0.77593499 | 0.55746738 |
| cg04486839 | C1orf192  | 1  | 0.00478595 | 0.81759101 | 0.74247178 | 0.64138618 |
| cg21118367 | C1orf21   | 1  | 0.01467615 | 0.28584684 | 0.33497414 | 0.14198957 |
| cg03320492 | C1orf228  | 1  | 0.03021634 | 0.43762173 | 0.39328501 | 0.27533803 |
| cg16684817 | C1orf38;C | 1  | 0.03055957 | 0.78114794 | 0.76918518 | 0.63206986 |
| cg05643188 | C1orf53   | 1  | 0.02389893 | 0.60316511 | 0.61359838 | 0.47738497 |
| cg26788737 | C1orf55   | 1  | 0.01311156 | 0.41485362 | 0.38705775 | 0.26323276 |
| cg24931346 | C1QB      | 1  | 0.00286125 | 0.67541019 | 0.68099469 | 0.57284453 |
| cg18527716 | C1QTNF1,  | 17 | 0.01980822 | 0.71932304 | 0.67772866 | 0.50895141 |
| cg05003411 | C1QTNF7,  | 4  | 0.00154265 | 0.8531175  | 0.83534301 | 0.70599176 |
| cg15013617 | C20orf14: | 20 | 0.00100445 | 0.35524926 | 0.31724761 | 0.16181861 |
| cg18157896 | C20orf14: | 20 | 0.0015244  | 0.44196217 | 0.49639206 | 0.23784693 |
| cg05890956 | C20orf18: | 20 | 0.01390012 | 0.66534898 | 0.67297318 | 0.53534182 |
| cg14065109 | C21orf57  | 21 | 0.02111228 | 0.58057543 | 0.60872286 | 0.46979147 |
| cg08416522 | C21orf7   | 21 | 0.00796332 | 0.56415934 | 0.62605573 | 0.4385059  |
| cg11466708 | C22orf43  | 22 | 0.00943058 | 0.63738401 | 0.75453316 | 0.42539637 |
| cg19942731 | C22orf9;C | 22 | 0.03866096 | 0.64316586 | 0.59905336 | 0.49420003 |
| cg18565216 | C2CD2;C2  | 21 | 0.00140256 | 0.26498695 | 0.29442846 | 0.14955845 |
| cg26174797 | C2orf53   | 2  | 0.00317466 | 0.57489728 | 0.5565974  | 0.4149764  |
| cg11130441 | C2orf58   | 2  | 0.03119297 | 0.78184269 | 0.7809297  | 0.61908723 |
| cg04499514 | C3AR1     | 12 | 0.00385922 | 0.56642609 | 0.48155176 | 0.32061792 |
| cg11118413 | C3orf27   | 3  | 0.00379918 | 0.31096593 | 0.33007722 | 0.19198627 |
| cg20749576 | C3orf27   | 3  | 0.0131276  | 0.39429883 | 0.40282656 | 0.28558509 |
| cg16217908 | C3orf52   | 3  | 0.01782206 | 0.34594592 | 0.32607619 | 0.18191383 |
| cg10224107 | C5AR1;C5  | 19 | 0.00411808 | 0.42290849 | 0.42714321 | 0.26335334 |
| cg08470180 | C5orf24;C | 5  | 0.00642271 | 0.54874588 | 0.52791236 | 0.41044887 |
| cg04871807 | C5orf27   | 5  | 0.00252833 | 0.84398824 | 0.83243724 | 0.7121007  |
| cg00287773 | C5orf32   | 5  | 0.0026461  | 0.61892842 | 0.5552687  | 0.31944221 |
| cg03653573 | C5orf56   | 5  | 0.00379486 | 0.48784989 | 0.43836989 | 0.26364349 |

|            |           |    |            |            |            |            |
|------------|-----------|----|------------|------------|------------|------------|
| cg15601361 | C6orf105; | 6  | 0.00066204 | 0.58601531 | 0.46808177 | 0.32175325 |
| cg08421910 | C6orf105; | 6  | 0.00103447 | 0.83619067 | 0.76743756 | 0.64851469 |
| cg01431340 | C6orf186  | 6  | 0.03585699 | 0.45989752 | 0.41114419 | 0.30591348 |
| cg00239660 | C6orf191  | 6  | 0.00334886 | 0.75689132 | 0.70947953 | 0.60812423 |
| cg19635401 | C6orf204; | 6  | 0.00414415 | 0.61687233 | 0.61893518 | 0.42505585 |
| cg18997124 | C6orf27   | 6  | 0.02680411 | 0.74771941 | 0.74781773 | 0.63562287 |
| cg06824394 | C7orf23   | 7  | 0.02763355 | 0.71029068 | 0.69180137 | 0.57697549 |
| cg18377014 | C7orf50;C | 7  | 0.04178799 | 0.64762124 | 0.67033752 | 0.52809461 |
| cg09453760 | C7orf65   | 7  | 0.01442631 | 0.37851346 | 0.39523311 | 0.26689319 |
| cg22454022 | C8orf34   | 8  | 0.01276611 | 0.5034807  | 0.53454686 | 0.33181557 |
| cg15947176 | C8orf46   | 8  | 0.00070134 | 0.54257107 | 0.44574833 | 0.31331725 |
| cg09933836 | C8orf75   | 8  | 0.00211366 | 0.24688185 | 0.36737581 | 0.14154295 |
| cg06745083 | CA5A      | 16 | 0.00663164 | 0.52298555 | 0.60027417 | 0.421673   |
| cg21039723 | CAB39;CA  | 2  | 0.0057272  | 0.71903287 | 0.71215101 | 0.58035683 |
| cg11847933 | CABC1     | 1  | 0.00798815 | 0.53727144 | 0.53787767 | 0.41098108 |
| cg19671694 | CABLES2   | 20 | 0.00820044 | 0.76430961 | 0.72842522 | 0.62390353 |
| cg26224018 | CACHD1    | 1  | 0.01488167 | 0.80358603 | 0.81477344 | 0.69919304 |
| cg14140691 | CACNA1B   | 9  | 0.00113894 | 0.41667337 | 0.39614934 | 0.29302745 |
| cg14022794 | CACNA1B   | 9  | 0.0102299  | 0.33806225 | 0.33929204 | 0.22262267 |
| cg02468320 | CACNA1C   | 12 | 0.00543797 | 0.65364734 | 0.6547712  | 0.37450534 |
| cg16728539 | CACNA1C   | 12 | 0.00306113 | 0.68848906 | 0.69799726 | 0.44679431 |
| cg01637090 | CACNA1H   | 16 | 0.001181   | 0.27493695 | 0.27188236 | 0.1481682  |
| cg07890233 | CACNA1H   | 16 | 0.00739749 | 0.7750812  | 0.73867151 | 0.58303792 |
| cg02041885 | CACNA1I;  | 22 | 0.00714351 | 0.52485812 | 0.5197878  | 0.40246278 |
| cg03364832 | CACNA2D   | 3  | 0.00943797 | 0.69458686 | 0.61243886 | 0.48997366 |
| cg10791541 | CACNA2D   | 3  | 0.00629716 | 0.6244516  | 0.70035929 | 0.52171501 |
| cg25482874 | CACNG6;C  | 19 | 0.00168532 | 0.29073246 | 0.29456007 | 0.16999881 |
| cg19521693 | CACNG8    | 19 | 0.00517725 | 0.47280005 | 0.47865937 | 0.35578791 |
| cg01293740 | CACNG8    | 19 | 0.00209769 | 0.42947405 | 0.42725552 | 0.28381314 |
| cg03505501 | CADM1;C   | 11 | 0.02450704 | 0.62787589 | 0.74865926 | 0.5179695  |
| cg13716443 | CADPS;CA  | 3  | 0.00206218 | 0.85156663 | 0.81286125 | 0.70277273 |
| cg02753187 | CALCOCO   | 17 | 0.01725665 | 0.61185305 | 0.66987702 | 0.49130026 |
| cg01077501 | CALD1;CA  | 7  | 0.00233439 | 0.8505807  | 0.83566009 | 0.72865508 |
| cg25937598 | CALHM3    | 10 | 0.04980289 | 0.71431057 | 0.72811456 | 0.60425314 |
| cg26957187 | CALN1;CA  | 7  | 0.00779924 | 0.52724049 | 0.54890364 | 0.34563557 |
| cg12273284 | CAMK1D;   | 10 | 0.00277534 | 0.54916517 | 0.49641014 | 0.32924321 |
| cg20994118 | CAMK1G    | 1  | 0.00854392 | 0.70070897 | 0.70101035 | 0.56561032 |
| cg17541002 | CAMKK2;C  | 12 | 0.00101815 | 0.76798101 | 0.73832334 | 0.4408899  |
| cg02275084 | CAMTA1    | 1  | 0.00073118 | 0.75395184 | 0.64972516 | 0.52333308 |
| cg21583016 | CAMTA1    | 1  | 0.00168675 | 0.87492716 | 0.81053994 | 0.65798569 |
| cg21410633 | CAP1;CAP  | 1  | 0.0437543  | 0.58123219 | 0.60501021 | 0.47538547 |
| cg05820435 | CAPZB     | 1  | 0.00074016 | 0.73792727 | 0.63783507 | 0.48234674 |
| cg06360604 | CAPZB     | 1  | 0.00065949 | 0.80132484 | 0.63356007 | 0.42553169 |
| cg12424867 | CAPZB     | 1  | 0.01318677 | 0.75123738 | 0.71644946 | 0.61581021 |
| cg01832549 | CAPZB     | 1  | 0.0035878  | 0.80147146 | 0.79217617 | 0.64733927 |
| cg15136975 | CAPZB     | 1  | 0.0173664  | 0.48886464 | 0.45964657 | 0.30245991 |



|            |          |    |            |            |            |            |
|------------|----------|----|------------|------------|------------|------------|
| cg00968167 | CAPZB    | 1  | 0.00372084 | 0.44345812 | 0.46594429 | 0.28427575 |
| cg09077096 | CARD11   | 7  | 0.01935097 | 0.73686867 | 0.72342527 | 0.58100677 |
| cg13775050 | CARD16;C | 11 | 0.01365382 | 0.72888501 | 0.80756156 | 0.60396824 |
| cg26818786 | CARD6    | 5  | 0.03951832 | 0.3624055  | 0.40251483 | 0.25532542 |
| cg15930041 | CASP14   | 19 | 0.02026622 | 0.68065624 | 0.68234598 | 0.53916395 |
| cg08469834 | CASP4    | 11 | 0.00195644 | 0.21003236 | 0.1974186  | 0.09068873 |
| cg24410214 | CASP8;CA | 2  | 0.00564684 | 0.29942957 | 0.36007504 | 0.18869609 |
| cg14985891 | CASQ2    | 1  | 0.01980843 | 0.44614833 | 0.4740853  | 0.30951617 |
| cg09729182 | CASR     | 3  | 0.01828536 | 0.43610878 | 0.40488597 | 0.26218961 |
| cg10202975 | CAST;CAS | 5  | 0.04937176 | 0.76703065 | 0.77783279 | 0.65202322 |
| cg05057515 | CBFA2T3  | 16 | 0.00772025 | 0.51804378 | 0.56415491 | 0.41454635 |
| cg07057235 | CBFA2T3  | 16 | 0.02077264 | 0.40067603 | 0.41082948 | 0.29102224 |
| cg23965590 | CBL      | 11 | 0.00405622 | 0.38228651 | 0.38978547 | 0.26724229 |
| cg01544580 | CBX1     | 17 | 0.03729142 | 0.76742955 | 0.77935986 | 0.64715193 |
| cg19283806 | CCDC102I | 18 | 0.00429569 | 0.68095441 | 0.68205352 | 0.53221077 |
| cg21616935 | CCDC11   | 18 | 0.0065693  | 0.62328473 | 0.60128934 | 0.45184604 |
| cg26539468 | CCDC111  | 4  | 0.00901377 | 0.43851622 | 0.46693912 | 0.30386558 |
| cg07220903 | CCDC12   | 3  | 0.00261671 | 0.59812066 | 0.54424589 | 0.31616878 |
| cg02943305 | CCDC129  | 7  | 0.00317348 | 0.50824763 | 0.51602264 | 0.36363929 |
| cg03100209 | CCDC155  | 19 | 0.00981397 | 0.33486378 | 0.36086506 | 0.21390056 |
| cg07997596 | CCDC27   | 1  | 0.01998122 | 0.48006359 | 0.49881719 | 0.37803204 |
| cg02708758 | CCDC33   | 15 | 0.00159601 | 0.88203477 | 0.80136192 | 0.69538634 |
| cg15507901 | CCDC54   | 3  | 0.02096205 | 0.6887436  | 0.77605143 | 0.5378439  |
| cg12504696 | CCDC60   | 12 | 0.01463726 | 0.73495504 | 0.71809122 | 0.60266237 |
| cg08365738 | CCDC80;C | 3  | 0.00220808 | 0.70790098 | 0.70076806 | 0.39836231 |
| cg17118262 | CCL1     | 17 | 0.01294921 | 0.60032096 | 0.63744582 | 0.49833862 |
| cg17864156 | CCL2     | 17 | 0.0109037  | 0.44147689 | 0.44206342 | 0.31787408 |
| cg17315454 | CCL24    | 7  | 0.01464559 | 0.57487711 | 0.61142493 | 0.44547889 |
| cg12788666 | CCL24    | 7  | 0.0113009  | 0.59746211 | 0.64462699 | 0.49661201 |
| cg02932854 | CCL24    | 7  | 0.00188499 | 0.45157651 | 0.3937451  | 0.29318807 |
| cg11303839 | CCL26    | 7  | 0.00127437 | 0.78064139 | 0.7137259  | 0.4970382  |
| cg18407309 | CCL3     | 17 | 0.00332487 | 0.58449609 | 0.67121572 | 0.47037987 |
| cg02483931 | CCL5     | 17 | 0.00485896 | 0.44789174 | 0.43939225 | 0.30867852 |
| cg08656816 | CCL5     | 17 | 0.00076043 | 0.4718691  | 0.37994239 | 0.218512   |
| cg01636591 | CCL8;CCL | 17 | 0.0022221  | 0.4023632  | 0.39787768 | 0.2373668  |
| cg03744842 | CCM2;CCI | 7  | 0.01729366 | 0.37509514 | 0.34753103 | 0.19892048 |
| cg24110396 | CCNY     | 10 | 0.00288962 | 0.74880478 | 0.74567262 | 0.58817529 |
| cg07740894 | CCNY;CCN | 10 | 0.00187952 | 0.79242958 | 0.72216165 | 0.62152722 |
| cg04110105 | CCR2;CCR | 3  | 0.02562377 | 0.62349814 | 0.60277248 | 0.47354973 |
| cg23817981 | CCR4     | 3  | 0.00635384 | 0.55624735 | 0.48427669 | 0.31220327 |
| cg26960939 | CCR7     | 17 | 0.00543797 | 0.53474273 | 0.52301578 | 0.38778568 |
| cg16047279 | CCR7     | 17 | 0.00068904 | 0.73294808 | 0.67981747 | 0.48275651 |
| cg07248223 | CCR7     | 17 | 0.00186784 | 0.75354648 | 0.72966024 | 0.48801937 |
| cg18599081 | CCRL2;CC | 3  | 0.00207996 | 0.80123592 | 0.75107945 | 0.54248522 |
| cg23350385 | CCRL2;CC | 3  | 0.00233734 | 0.65494052 | 0.61691372 | 0.3857278  |
| cg19850333 | CCRL2;CC | 3  | 0.03477069 | 0.33349762 | 0.36226595 | 0.23071381 |

|            |          |    |            |            |            |            |
|------------|----------|----|------------|------------|------------|------------|
| cg01606773 | CD109;CE | 6  | 0.0009502  | 0.68845728 | 0.50740889 | 0.39048924 |
| cg17638468 | CD200R1; | 3  | 0.0412314  | 0.64049063 | 0.68698142 | 0.52297891 |
| cg15743985 | CD22     | 19 | 0.01398104 | 0.66165132 | 0.66561496 | 0.54994372 |
| cg19090861 | CD248    | 11 | 0.00214604 | 0.47372158 | 0.43693971 | 0.28053619 |
| cg14910296 | CD276;CE | 15 | 0.00563159 | 0.81258976 | 0.74711159 | 0.64132218 |
| cg13790288 | CD28     | 2  | 0.00531242 | 0.6314714  | 0.65304585 | 0.42678112 |
| cg04098585 | CD28;CD2 | 2  | 0.01016149 | 0.72896284 | 0.75992308 | 0.54192717 |
| cg03069736 | CD300C;C | 17 | 0.00606409 | 0.56019493 | 0.55751864 | 0.44529113 |
| cg03533256 | CD300E   | 17 | 0.03212425 | 0.61388565 | 0.5665284  | 0.39701891 |
| cg14438208 | CD300E;C | 17 | 0.00479296 | 0.83790898 | 0.83075807 | 0.71327977 |
| cg00873351 | CD300LB  | 17 | 0.01291835 | 0.35143735 | 0.38805771 | 0.24495935 |
| cg14075731 | CD300LB; | 17 | 0.01465218 | 0.60912997 | 0.630515   | 0.49453256 |
| cg20293352 | CD34;CD3 | 1  | 0.02595684 | 0.42914676 | 0.40669516 | 0.29519543 |
| cg06601993 | CD36     | 7  | 0.00685049 | 0.7479896  | 0.71896354 | 0.57812259 |
| cg22908581 | CD4      | 12 | 0.00674227 | 0.39757035 | 0.42158056 | 0.29383624 |
| cg14082886 | CD44;CD4 | 11 | 0.00100019 | 0.84660752 | 0.82115164 | 0.62062266 |
| cg20868817 | CD48     | 1  | 0.00697437 | 0.45565074 | 0.47707838 | 0.29913697 |
| cg19408145 | CD48     | 1  | 0.00768774 | 0.42053602 | 0.46652614 | 0.28773063 |
| cg10516886 | CD53;CDE | 1  | 0.03471543 | 0.57117468 | 0.59803288 | 0.47094464 |
| cg17240760 | CD53;CDE | 1  | 0.00535942 | 0.54004491 | 0.62277682 | 0.39865181 |
| cg23903301 | CD59;CDE | 11 | 0.00065949 | 0.73261101 | 0.62806514 | 0.40146884 |
| cg04188351 | CD59;CDE | 11 | 0.00737637 | 0.40825608 | 0.40172754 | 0.23473473 |
| cg07440264 | CD59;CDE | 11 | 0.00073265 | 0.81444089 | 0.74622864 | 0.50869879 |
| cg13014558 | CD6      | 11 | 0.04126303 | 0.66414632 | 0.72068944 | 0.55594461 |
| cg11848173 | CD63;CDE | 12 | 0.00276502 | 0.6244759  | 0.56797265 | 0.36338382 |
| cg03677492 | CD7      | 17 | 0.00225589 | 0.33710427 | 0.32196852 | 0.21676232 |
| cg06692929 | CD7      | 17 | 0.01294921 | 0.37329093 | 0.38458916 | 0.2467133  |
| cg21108085 | CD82;CDE | 11 | 0.00334886 | 0.38051972 | 0.28852049 | 0.1723684  |
| cg02945019 | CD84     | 1  | 0.03502085 | 0.61871304 | 0.58206597 | 0.47462338 |
| cg01878435 | CD86     | 3  | 0.01561358 | 0.35563612 | 0.39730621 | 0.23908598 |
| cg07341609 | CDC42EP1 | 22 | 0.00357777 | 0.72667447 | 0.67046649 | 0.40152496 |
| cg09220326 | CDCP1;CE | 3  | 0.00295256 | 0.38073371 | 0.34176213 | 0.18765659 |
| cg02973961 | CDH11    | 16 | 0.01068625 | 0.77807687 | 0.77642529 | 0.58668492 |
| cg09415485 | CDH13    | 16 | 0.00076471 | 0.60723854 | 0.48298518 | 0.35494659 |
| cg04304802 | CDH23    | 10 | 0.00855749 | 0.48918974 | 0.51062965 | 0.30071916 |
| cg04005943 | CDH23;CE | 10 | 0.02054758 | 0.60651019 | 0.63532321 | 0.44255092 |
| cg16325421 | CDH4     | 20 | 0.00253153 | 0.59868964 | 0.55648736 | 0.43984498 |
| cg02078525 | CDH5     | 16 | 0.01921519 | 0.44023763 | 0.44909432 | 0.33671581 |
| cg02723617 | CDK5;CDK | 7  | 0.0012504  | 0.40867004 | 0.36645473 | 0.26532407 |
| cg05101437 | CDK6;CDK | 7  | 0.00113577 | 0.55413764 | 0.51952008 | 0.20601403 |
| cg23342625 | CDKAL1   | 6  | 0.00078196 | 0.88099025 | 0.84749215 | 0.73558172 |
| cg06321045 | CDSN;PSC | 6  | 0.01660506 | 0.73766631 | 0.7467555  | 0.63665508 |
| cg03545404 | CDX1     | 5  | 0.00486208 | 0.62197308 | 0.59659817 | 0.47347875 |
| cg23241878 | CEACAM2  | 19 | 0.04639674 | 0.44149078 | 0.44858705 | 0.31860736 |
| cg21529807 | CEACAM4  | 19 | 0.0132124  | 0.37025954 | 0.38645908 | 0.26225128 |
| cg06726231 | CECR1;CE | 22 | 0.00073118 | 0.5649696  | 0.47412501 | 0.34090112 |

|            |            |    |            |            |            |            |
|------------|------------|----|------------|------------|------------|------------|
| cg09397359 | CELSR3     | 3  | 0.02049456 | 0.74292029 | 0.76709496 | 0.61894038 |
| cg13237068 | CENPJ      | 13 | 0.01486263 | 0.79211272 | 0.8419998  | 0.64966869 |
| cg26542660 | CEP135     | 4  | 0.0070758  | 0.48669833 | 0.50838221 | 0.33101371 |
| cg03447083 | CES3       | 16 | 0.007634   | 0.35661255 | 0.33270997 | 0.23206374 |
| cg12124018 | CFB        | 6  | 0.00071044 | 0.72960893 | 0.63342106 | 0.53208573 |
| cg05647929 | CFC1B;CF   | 2  | 0.01856748 | 0.47338364 | 0.54084774 | 0.33718156 |
| cg22092521 | CFD        | 19 | 0.00722201 | 0.4629359  | 0.45498925 | 0.30438288 |
| cg06633978 | CFDP1      | 16 | 0.00852388 | 0.81572749 | 0.83720748 | 0.65477272 |
| cg03974286 | CFLAR;CF   | 2  | 0.02672791 | 0.46529698 | 0.48442548 | 0.3377011  |
| cg10947827 | CFLAR;CF   | 2  | 0.00775785 | 0.50986632 | 0.47736302 | 0.36023772 |
| cg12944530 | CFLAR;CF   | 2  | 0.02241528 | 0.78697526 | 0.84461659 | 0.6244754  |
| cg23457862 | CFLAR;CF   | 2  | 0.00311192 | 0.43206145 | 0.46739819 | 0.25345151 |
| cg25198049 | CGN        | 1  | 0.00293109 | 0.60425274 | 0.59318981 | 0.37846503 |
| cg07596668 | CGN        | 1  | 0.00713936 | 0.74191642 | 0.74428858 | 0.58312214 |
| cg18670236 | CHCHD6     | 3  | 0.00281579 | 0.78942874 | 0.7818668  | 0.48566654 |
| cg25035059 | CHD7       | 8  | 0.00733126 | 0.26797638 | 0.25480854 | 0.15327232 |
| cg03355213 | CHMP4B     | 20 | 0.00411861 | 0.5362709  | 0.67235888 | 0.43292872 |
| cg11941300 | CHRFAM7    | 15 | 0.0398235  | 0.80530545 | 0.81872201 | 0.69746251 |
| cg04590119 | CHRM2;C    | 7  | 0.01032661 | 0.74951441 | 0.717314   | 0.61264525 |
| cg07157107 | CHRNA6     | 8  | 0.01114245 | 0.39818147 | 0.41751697 | 0.27378347 |
| cg27051318 | CHRNA6     | 8  | 0.01442596 | 0.73221117 | 0.71007131 | 0.57643038 |
| cg06523556 | CHRNA6     | 8  | 0.01059488 | 0.44870015 | 0.41007438 | 0.2518158  |
| cg26531231 | CHRNA9     | 4  | 0.00077754 | 0.82116921 | 0.76593387 | 0.65947739 |
| cg16861964 | CHST11     | 12 | 0.0058315  | 0.44610494 | 0.39646667 | 0.23737362 |
| cg00608661 | CHST11     | 12 | 0.00087274 | 0.83627888 | 0.78010437 | 0.62203876 |
| cg18664965 | CHST13     | 3  | 0.00131453 | 0.53095147 | 0.44677513 | 0.30793167 |
| cg13276580 | CHST15     | 10 | 0.00317531 | 0.46525582 | 0.51019202 | 0.31702754 |
| cg20388165 | CHSY1      | 15 | 0.02917135 | 0.79800028 | 0.80964147 | 0.69687268 |
| cg08327038 | CIRH1A     | 16 | 0.00112626 | 0.54797343 | 0.45597028 | 0.3398472  |
| cg02295216 | CKLF;CKLF  | 16 | 0.00137441 | 0.48538929 | 0.39148717 | 0.20726125 |
| cg13790426 | CLCC1;CLC  | 1  | 0.00354163 | 0.53928747 | 0.56782995 | 0.38198093 |
| cg08702344 | CLDN12     | 7  | 0.02122541 | 0.73329174 | 0.75809817 | 0.60464737 |
| cg13643452 | CLEC14A    | 14 | 0.01485881 | 0.30467339 | 0.30065556 | 0.19692122 |
| cg16125874 | CLEC14A;   | 14 | 0.02611848 | 0.75692095 | 0.74023557 | 0.60320919 |
| cg03217729 | CLEC16A    | 16 | 0.03376554 | 0.59381923 | 0.63608428 | 0.48943682 |
| cg08321576 | CLEC2B;C   | 12 | 0.00317234 | 0.52457555 | 0.53146582 | 0.26767513 |
| cg13300689 | CLEC2D;C   | 12 | 0.00279059 | 0.2407009  | 0.24071826 | 0.12951814 |
| cg03447908 | CLEC3B     | 3  | 0.00804549 | 0.67983693 | 0.718942   | 0.45094702 |
| cg18460107 | CLEC4C;C   | 12 | 0.00092849 | 0.67525292 | 0.66249366 | 0.54303889 |
| cg03619586 | CLIC1      | 6  | 0.00405794 | 0.34843678 | 0.40229869 | 0.22838762 |
| cg18434367 | CLIC5;CLIC | 6  | 0.0015244  | 0.77253877 | 0.78701521 | 0.6644535  |
| cg13730618 | CLIC6      | 21 | 0.02122541 | 0.478077   | 0.49982353 | 0.36756349 |
| cg05239310 | CLMN       | 14 | 0.00218429 | 0.58479712 | 0.53258785 | 0.28521166 |
| cg02330500 | CLMN       | 14 | 0.00252984 | 0.4808914  | 0.52181044 | 0.28581075 |
| cg06745511 | CLNK       | 4  | 0.00659076 | 0.34395415 | 0.3901613  | 0.1797272  |
| cg00865429 | CLNK       | 4  | 0.00086795 | 0.73142834 | 0.61378465 | 0.4622015  |

|            |           |    |            |            |            |            |
|------------|-----------|----|------------|------------|------------|------------|
| cg20143111 | CLNK      | 4  | 0.02362077 | 0.73871149 | 0.76498189 | 0.61677799 |
| cg00326231 | CLTCL1;CI | 22 | 0.00243597 | 0.39679389 | 0.42090934 | 0.22830628 |
| cg20471562 | CNGA3;CI  | 2  | 0.0198367  | 0.68014298 | 0.64019334 | 0.53998484 |
| cg09988837 | CNIH3     | 1  | 0.00908203 | 0.55796478 | 0.57148073 | 0.37541309 |
| cg11812748 | CNST;CNS  | 1  | 0.01857513 | 0.33026293 | 0.33759353 | 0.20398774 |
| cg14131220 | CNTFR;CN  | 9  | 0.00569156 | 0.70473114 | 0.67983429 | 0.46844575 |
| cg02825887 | CNTFR;CN  | 9  | 0.00122265 | 0.54313282 | 0.47824661 | 0.25352146 |
| cg22878054 | CNTN5;CI  | 11 | 0.02651696 | 0.74878614 | 0.75211697 | 0.64534903 |
| cg20694241 | CNTNAP3   | 9  | 0.0115206  | 0.53966987 | 0.5917219  | 0.43220273 |
| cg00937175 | COL18A1   | 21 | 0.00377649 | 0.812017   | 0.74028801 | 0.6393219  |
| cg22809726 | COL1A1    | 17 | 0.00073265 | 0.24799203 | 0.20147817 | 0.09102942 |
| cg25026926 | COL1A1    | 17 | 0.00072814 | 0.70442328 | 0.62087533 | 0.48176953 |
| cg14700325 | COL1A1    | 17 | 0.00065949 | 0.84869905 | 0.72002632 | 0.57511178 |
| cg18618815 | COL1A1    | 17 | 0.03450675 | 0.80260095 | 0.84365782 | 0.66985024 |
| cg02186748 | COL1A1    | 17 | 0.00258198 | 0.64073879 | 0.61347484 | 0.49608975 |
| cg23348014 | COL1A2    | 7  | 0.00492669 | 0.62292369 | 0.54796907 | 0.38844309 |
| cg06299997 | COL1A2    | 7  | 0.00084118 | 0.58437202 | 0.51309639 | 0.34267282 |
| cg10368049 | COL1A2    | 7  | 0.00230867 | 0.62314913 | 0.59604235 | 0.37135776 |
| cg13079333 | COL20A1   | 20 | 0.00411808 | 0.36900178 | 0.35319688 | 0.2206857  |
| cg05008898 | COL23A1   | 5  | 0.0102299  | 0.69481858 | 0.6891862  | 0.57501341 |
| cg06485308 | COL23A1   | 5  | 0.00168741 | 0.69987975 | 0.61460407 | 0.51417233 |
| cg08760493 | COL25A1;  | 4  | 0.00935896 | 0.70661928 | 0.67351653 | 0.48771816 |
| cg10275917 | COL28A1   | 7  | 0.00078196 | 0.60308378 | 0.49301873 | 0.35020113 |
| cg04887675 | COL4A1    | 13 | 0.02175305 | 0.59013401 | 0.57303207 | 0.43435123 |
| cg22332589 | COL4A2    | 13 | 0.00131674 | 0.78443005 | 0.85369225 | 0.63530136 |
| cg04815713 | COL4A2    | 13 | 0.00082513 | 0.8169724  | 0.77503229 | 0.65674258 |
| cg18114040 | COL4A2    | 13 | 0.02944061 | 0.76619222 | 0.81560231 | 0.63747854 |
| cg10979567 | COL6A3;C  | 2  | 0.01830967 | 0.78112922 | 0.78269358 | 0.6746039  |
| cg21175685 | COL8A1;N  | 3  | 0.0006776  | 0.79729294 | 0.73696433 | 0.59442685 |
| cg00876141 | CORIN     | 4  | 0.00883762 | 0.67573293 | 0.74417311 | 0.50885747 |
| cg09182455 | CORO1C    | 12 | 0.00930663 | 0.88914265 | 0.88290873 | 0.76059094 |
| cg13836518 | CORO2A;C  | 9  | 0.00741048 | 0.35870262 | 0.33075844 | 0.22580048 |
| cg08290628 | CORO2B    | 15 | 0.00634238 | 0.83027977 | 0.80199744 | 0.67767618 |
| cg10423607 | CPA6;CPA  | 8  | 0.00652679 | 0.75906421 | 0.77169684 | 0.53185369 |
| cg26426690 | CPEB3     | 10 | 0.00302287 | 0.73710931 | 0.71612947 | 0.56669219 |
| cg19464524 | CPEB3     | 10 | 0.0033331  | 0.44166527 | 0.3817089  | 0.21027047 |
| cg24238409 | CPEB3     | 10 | 0.0034485  | 0.64998418 | 0.58288295 | 0.45180527 |
| cg22881750 | CPNE5     | 6  | 0.00149058 | 0.51200335 | 0.48318618 | 0.25527534 |
| cg23756264 | CPT1A;CP  | 11 | 0.03471543 | 0.6870948  | 0.75012509 | 0.5733755  |
| cg00233633 | CPVL;CPV  | 7  | 0.00758063 | 0.49398299 | 0.51988893 | 0.31690896 |
| cg03073429 | CPXM2     | 10 | 0.00732415 | 0.5915782  | 0.61151435 | 0.45564583 |
| cg09709565 | CREB3L1   | 11 | 0.00065949 | 0.72854159 | 0.48831049 | 0.32877579 |
| cg01972879 | CRHR2     | 7  | 0.03743475 | 0.72374828 | 0.71395635 | 0.60042054 |
| cg10004114 | CRLF1     | 19 | 0.02878476 | 0.78281331 | 0.77836372 | 0.63331323 |
| cg00166343 | CRLF3     | 17 | 0.01678972 | 0.78266895 | 0.80607648 | 0.65760295 |
| cg16294414 | CROCC     | 1  | 0.02205285 | 0.72469116 | 0.66649847 | 0.56170849 |

|            |           |    |            |            |            |            |
|------------|-----------|----|------------|------------|------------|------------|
| cg26369418 | CSF2      | 5  | 0.00396568 | 0.42024914 | 0.47875559 | 0.27189541 |
| cg20450123 | CSGALNA   | 8  | 0.00149569 | 0.32373628 | 0.27511811 | 0.16353192 |
| cg14854503 | CSGALNA   | 8  | 0.0080564  | 0.7278286  | 0.71484487 | 0.55527596 |
| cg06699216 | CSGALNA   | 8  | 0.00523353 | 0.81124879 | 0.836456   | 0.66811609 |
| cg14722693 | CSGALNA   | 8  | 0.00065949 | 0.50590118 | 0.43980127 | 0.29009835 |
| cg23014871 | CSGALNA   | 10 | 0.00704122 | 0.7526066  | 0.70738006 | 0.57887872 |
| cg09631495 | CSMD1     | 8  | 0.01132073 | 0.89370845 | 0.87247603 | 0.73651357 |
| cg20564969 | CSMD1     | 8  | 0.00380612 | 0.35030258 | 0.345906   | 0.22076834 |
| cg01136458 | CSMD1     | 8  | 0.00520163 | 0.49947766 | 0.49646279 | 0.33556079 |
| cg24759795 | CSMD3;C   | 8  | 0.00197986 | 0.39145451 | 0.38140137 | 0.18929312 |
| cg21896766 | CSMD3;C   | 8  | 0.00171661 | 0.46495189 | 0.49406487 | 0.24630557 |
| cg25581222 | CSNK1G1   | 15 | 0.00121809 | 0.76821823 | 0.74775072 | 0.48033446 |
| cg24168221 | CST9      | 20 | 0.01162689 | 0.64733439 | 0.65876483 | 0.51978137 |
| cg11897887 | CST9L     | 20 | 0.03017877 | 0.51898681 | 0.73074418 | 0.31748232 |
| cg18618429 | CSTA      | 3  | 0.00602447 | 0.40653054 | 0.45646732 | 0.2565209  |
| cg12386061 | CTDSPL;C  | 3  | 0.01987695 | 0.30471973 | 0.35354826 | 0.20272211 |
| cg06968859 | CTNNA2;C  | 2  | 0.00246645 | 0.70530567 | 0.68843819 | 0.48492465 |
| cg14698665 | CTNND2    | 5  | 0.0138324  | 0.48627663 | 0.51010559 | 0.35119365 |
| cg14436231 | CTNS;CTN  | 17 | 0.01332867 | 0.3956247  | 0.36609165 | 0.25261357 |
| cg03206537 | CTSA;CTS  | 20 | 0.00670577 | 0.63149721 | 0.6179396  | 0.46395909 |
| cg01099512 | CTSG      | 14 | 0.04155652 | 0.53387887 | 0.51769416 | 0.39039283 |
| cg19792802 | CTSW      | 11 | 0.01396719 | 0.50375659 | 0.50839515 | 0.35532571 |
| cg08416661 | CTSW      | 11 | 0.00756169 | 0.34387311 | 0.31956296 | 0.20278958 |
| cg23679724 | CTSZ      | 20 | 0.00066204 | 0.54990101 | 0.47005614 | 0.33279823 |
| cg12787553 | CTSZ      | 20 | 0.02125381 | 0.72487929 | 0.79201711 | 0.62156455 |
| cg18563860 | CTSZ      | 20 | 0.00686574 | 0.88705135 | 0.88522222 | 0.77303394 |
| cg25913882 | CUBN      | 10 | 0.00068904 | 0.87086474 | 0.79094467 | 0.68385921 |
| cg22900075 | CUEDC1    | 17 | 0.00368593 | 0.61448323 | 0.57984128 | 0.45563667 |
| cg18940274 | CUL1      | 7  | 0.00430896 | 0.9071466  | 0.90729625 | 0.79771048 |
| cg23261443 | CUX1;CU   | 7  | 0.00159601 | 0.59768238 | 0.55972243 | 0.4231883  |
| cg25113157 | CUX2      | 12 | 0.00748137 | 0.45922377 | 0.47685154 | 0.29864848 |
| cg08944961 | CUX2      | 12 | 0.00531242 | 0.55925127 | 0.58930678 | 0.38206224 |
| cg03296370 | CX3CR1;C  | 3  | 0.00431388 | 0.31905974 | 0.32281174 | 0.19586292 |
| cg18956547 | CXCR1     | 2  | 0.00315265 | 0.31529558 | 0.29753638 | 0.16163571 |
| cg25941354 | CXCR2     | 2  | 0.02190777 | 0.58432417 | 0.6083344  | 0.4828086  |
| cg12595667 | CXCR4;CX  | 2  | 0.01093903 | 0.66884402 | 0.66509774 | 0.47411148 |
| cg01257799 | CXCR5     | 11 | 0.00499353 | 0.45738933 | 0.43833485 | 0.246397   |
| cg04294383 | CYFIP1;CY | 15 | 0.00077582 | 0.91010143 | 0.87357533 | 0.76406216 |
| cg23217940 | CYFIP1;CY | 15 | 0.00065949 | 0.77737033 | 0.66007542 | 0.53860856 |
| cg24844518 | CYFIP2;CY | 5  | 0.01365337 | 0.47152873 | 0.63742048 | 0.33031976 |
| cg20073007 | CYP11B1;  | 8  | 0.00258141 | 0.36833447 | 0.38338769 | 0.2610053  |
| cg07954324 | CYP11B2   | 8  | 0.00186737 | 0.42518876 | 0.42071832 | 0.31789678 |
| cg02162897 | CYP1B1    | 2  | 0.00180551 | 0.84579382 | 0.80702024 | 0.62388312 |
| cg20408276 | CYP1B1    | 2  | 0.00132756 | 0.82685029 | 0.74285285 | 0.62778731 |
| cg00565882 | CYP1B1    | 2  | 0.01430792 | 0.49085131 | 0.51953163 | 0.32653454 |
| cg06264984 | CYP1B1    | 2  | 0.00190678 | 0.54582496 | 0.63461928 | 0.38198399 |

|            |          |    |            |            |            |            |
|------------|----------|----|------------|------------|------------|------------|
| cg19852607 | CYP2C18; | 10 | 0.04540817 | 0.44564025 | 0.4192762  | 0.31832238 |
| cg06579354 | CYP2F1   | 19 | 0.0039383  | 0.62280924 | 0.6136033  | 0.45170709 |
| cg17461336 | CYP3A43; | 7  | 0.00583531 | 0.66939792 | 0.65946071 | 0.4915224  |
| cg21637761 | CYTSB;CY | 17 | 0.00065949 | 0.78598198 | 0.66418356 | 0.52121788 |
| cg15602972 | DACT3    | 19 | 0.02711474 | 0.64126807 | 0.6665247  | 0.50214141 |
| cg19815574 | DACT3    | 19 | 0.01191142 | 0.47980125 | 0.49439344 | 0.36749778 |
| cg23976388 | DAGLA    | 11 | 0.01870855 | 0.56762899 | 0.58042972 | 0.38057719 |
| cg20242427 | DAK      | 11 | 0.01507976 | 0.607377   | 0.56804277 | 0.42539229 |
| cg25406518 | DAK;DDB: | 11 | 0.00128725 | 0.58205257 | 0.52045686 | 0.41735522 |
| cg21244322 | DAPK2    | 15 | 0.00775785 | 0.79221706 | 0.76149033 | 0.52094359 |
| cg09365002 | DAXX;DA) | 6  | 0.0012838  | 0.83064072 | 0.78269357 | 0.63919099 |
| cg09597022 | DAXX;DA) | 6  | 0.0013522  | 0.81940959 | 0.77821079 | 0.62856974 |
| cg07905975 | DAXX;DA) | 6  | 0.00507632 | 0.73888945 | 0.67283703 | 0.52691119 |
| cg24498636 | DAXX;DA) | 6  | 0.00976408 | 0.56120802 | 0.50421604 | 0.36955061 |
| cg22697517 | DBF4B;DE | 17 | 0.01860545 | 0.45697831 | 0.48096591 | 0.34210585 |
| cg21572000 | DCAF5    | 14 | 0.00626821 | 0.76356973 | 0.76071904 | 0.62200611 |
| cg02575483 | DCBLD1   | 6  | 0.01608519 | 0.67546752 | 0.69325948 | 0.52198319 |
| cg08514408 | DCK      | 4  | 0.00074036 | 0.5485202  | 0.4592838  | 0.29880117 |
| cg23574583 | DCLK1    | 13 | 0.0009934  | 0.77964848 | 0.72019838 | 0.58084985 |
| cg15001032 | DDC;DDC  | 7  | 0.01952894 | 0.36030745 | 0.41996503 | 0.25902559 |
| cg05883128 | DDX60    | 4  | 0.00334901 | 0.53099938 | 0.5539299  | 0.38083482 |
| cg11721464 | DEDD2    | 19 | 0.0231425  | 0.69025827 | 0.72836722 | 0.5144764  |
| cg14189583 | DEDD2    | 19 | 0.01864666 | 0.5545901  | 0.5754352  | 0.40330564 |
| cg10076006 | DEFB1    | 8  | 0.03060322 | 0.34260922 | 0.35156369 | 0.2165148  |
| cg01958189 | DEFB125  | 20 | 0.02328473 | 0.63443738 | 0.61697153 | 0.51230764 |
| cg12807628 | DEFB135  | 8  | 0.00329066 | 0.34451715 | 0.33965728 | 0.23526112 |
| cg05226729 | DEFB135  | 8  | 0.00227382 | 0.85030755 | 0.80963851 | 0.67159025 |
| cg22743884 | DEFB135  | 8  | 0.00474032 | 0.78374076 | 0.80609644 | 0.64791549 |
| cg02920600 | DGKI     | 7  | 0.00065949 | 0.73533173 | 0.5726098  | 0.36440879 |
| cg07092212 | DGKZ;DGI | 11 | 0.00958999 | 0.72346978 | 0.71644359 | 0.58042022 |
| cg01132064 | DGKZ;DGI | 11 | 0.03166005 | 0.69727186 | 0.71310571 | 0.58439993 |
| cg02211741 | DGKZ;DGI | 11 | 0.02775429 | 0.72766835 | 0.74836539 | 0.62512997 |
| cg10177197 | DHCR24   | 1  | 0.00065949 | 0.88453569 | 0.78999081 | 0.61279193 |
| cg17475467 | DHCR24   | 1  | 0.00065949 | 0.72747816 | 0.55898914 | 0.45896345 |
| cg13624631 | DHRS7    | 14 | 0.00127238 | 0.29136533 | 0.23274168 | 0.10703781 |
| cg22129276 | DHRS9;DH | 2  | 0.0138324  | 0.57011999 | 0.61419524 | 0.43068663 |
| cg04097334 | DIRC1    | 2  | 0.02251946 | 0.48658948 | 0.50174271 | 0.356841   |
| cg07328664 | DIS3L2   | 2  | 0.00073118 | 0.84169812 | 0.77794015 | 0.60529875 |
| cg08467371 | DIS3L2   | 2  | 0.00442269 | 0.48031209 | 0.42813781 | 0.32767412 |
| cg00550040 | DKFZp566 | 19 | 0.00218799 | 0.70720867 | 0.68269866 | 0.52313756 |
| cg27395342 | DLC1;DLC | 8  | 0.00073118 | 0.48784054 | 0.39967409 | 0.24223052 |
| cg15681239 | DLEC1;DL | 3  | 0.00310177 | 0.79946616 | 0.75795269 | 0.49569484 |
| cg03439898 | DLGAP2   | 8  | 0.04175282 | 0.81032526 | 0.85121986 | 0.68590944 |
| cg05455971 | DLGAP2   | 8  | 0.00968951 | 0.75955691 | 0.79161733 | 0.65236992 |
| cg09730801 | DLX4;DLX | 17 | 0.00196226 | 0.66158075 | 0.69637198 | 0.54554151 |
| cg13619074 | DMRT1    | 9  | 0.01399795 | 0.55942524 | 0.56114632 | 0.44735261 |

|            |          |    |            |            |            |            |
|------------|----------|----|------------|------------|------------|------------|
| cg14377594 | DMRT2;D  | 9  | 0.00232775 | 0.68741532 | 0.68441192 | 0.52358071 |
| cg12626882 | DNAH9;D  | 17 | 0.00427549 | 0.66556294 | 0.63216023 | 0.48214924 |
| cg07993586 | DNAJB6   | 7  | 0.0023359  | 0.9212064  | 0.91725212 | 0.7648115  |
| cg22913903 | DNAJC22  | 12 | 0.00293735 | 0.41690359 | 0.38583749 | 0.26107104 |
| cg21763058 | DNAJC22  | 12 | 0.0049312  | 0.42787917 | 0.42301367 | 0.27673016 |
| cg07028869 | DNAJC22; | 12 | 0.00244246 | 0.40997584 | 0.39604919 | 0.23414753 |
| cg07197831 | DNAJC5G  | 2  | 0.01004931 | 0.52833852 | 0.52544551 | 0.3771993  |
| cg15503081 | DNASE2   | 19 | 0.03129419 | 0.58769868 | 0.6045772  | 0.45136961 |
| cg07802362 | DNM3;DN  | 1  | 0.00077468 | 0.8380504  | 0.76183423 | 0.62402249 |
| cg00050692 | DNMT3A;  | 2  | 0.00561533 | 0.83822326 | 0.84527095 | 0.64245602 |
| cg03752935 | DOCK1    | 10 | 0.04380272 | 0.64476312 | 0.72122047 | 0.52685471 |
| cg14939821 | DOCK1;FA | 10 | 0.00445086 | 0.6455142  | 0.67669641 | 0.42345988 |
| cg05363955 | DOCK10   | 2  | 0.00112617 | 0.86853997 | 0.80061746 | 0.64374314 |
| cg25012185 | DOCK10   | 2  | 0.00499353 | 0.69882432 | 0.6857322  | 0.5727209  |
| cg11394600 | DOCK4    | 7  | 0.028008   | 0.70394974 | 0.76107751 | 0.56984089 |
| cg06870470 | DOCK6    | 19 | 0.00441677 | 0.33707606 | 0.32350148 | 0.18158787 |
| cg16146353 | DPP10    | 2  | 0.02115736 | 0.70832329 | 0.70886599 | 0.58704689 |
| cg05868547 | DPP10    | 2  | 0.00958772 | 0.7814168  | 0.7871094  | 0.66475889 |
| cg02926033 | DPP6;DPF | 7  | 0.00590146 | 0.69419786 | 0.70051056 | 0.58388847 |
| cg26187031 | DPYSL2   | 8  | 0.00065949 | 0.71778905 | 0.61989535 | 0.40373128 |
| cg17759095 | DST      | 6  | 0.0036184  | 0.75028207 | 0.70434671 | 0.51568023 |
| cg20236089 | DTNBP1;I | 6  | 0.0012838  | 0.31543958 | 0.2542831  | 0.12665072 |
| cg07946977 | DUSP10;I | 1  | 0.01860545 | 0.81262065 | 0.8431616  | 0.66544428 |
| cg27449114 | DUSP28   | 2  | 0.00614688 | 0.35614782 | 0.37009716 | 0.23452082 |
| cg09357462 | DUSP5    | 10 | 0.0008696  | 0.65683182 | 0.57021289 | 0.43396087 |
| cg02927679 | DUSP5    | 10 | 0.00109472 | 0.5729151  | 0.49487233 | 0.38170037 |
| cg10080966 | DUSP5    | 10 | 0.00074016 | 0.42033312 | 0.31440056 | 0.20785763 |
| cg03290131 | DUSP5    | 10 | 0.00407141 | 0.42517429 | 0.38474389 | 0.23782813 |
| cg10077746 | DUSP6;DI | 12 | 0.01258987 | 0.45167667 | 0.37073953 | 0.26455177 |
| cg27365701 | DUSP6;DI | 12 | 0.01956069 | 0.65730051 | 0.67457593 | 0.47135752 |
| cg17740822 | DUSP6;DI | 12 | 0.00290723 | 0.31893907 | 0.31459003 | 0.17884799 |
| cg05769889 | DUSP6;DI | 12 | 0.00186249 | 0.31968312 | 0.32805432 | 0.16990568 |
| cg13460297 | DYNC1I2  | 2  | 0.00471011 | 0.81454768 | 0.80491028 | 0.68969468 |
| cg17726575 | E2F6;E2F | 2  | 0.01678444 | 0.67889765 | 0.72451375 | 0.56745208 |
| cg02930866 | EAF1     | 3  | 0.00217555 | 0.61061816 | 0.60779696 | 0.3318631  |
| cg21211213 | EBF1     | 5  | 0.00457097 | 0.30965325 | 0.30066929 | 0.15813753 |
| cg00210856 | EBF1     | 5  | 0.02001663 | 0.78586782 | 0.80159828 | 0.62069037 |
| cg11898646 | EBF1     | 5  | 0.02743413 | 0.80316736 | 0.8151961  | 0.66606609 |
| cg00594129 | EBF1     | 5  | 0.01170233 | 0.4046281  | 0.38178509 | 0.24534808 |
| cg07616828 | EBF2     | 8  | 0.0018234  | 0.42831547 | 0.37860763 | 0.2733012  |
| cg05487589 | EBF2     | 8  | 0.00337574 | 0.59687452 | 0.60407407 | 0.34624703 |
| cg03497907 | EBF3     | 10 | 0.01966537 | 0.62956975 | 0.66857089 | 0.48936475 |
| cg21005416 | ECE1;ECE | 1  | 0.00575836 | 0.55120602 | 0.48671609 | 0.35815199 |
| cg13527631 | ECE2     | 3  | 0.00393823 | 0.50966188 | 0.49493727 | 0.39351409 |
| cg16386293 | ECM1;ECI | 1  | 0.000777   | 0.59579263 | 0.53958331 | 0.39986281 |
| cg09809672 | EDARADD  | 1  | 0.04228846 | 0.54646223 | 0.56010226 | 0.42133899 |

|            |           |    |            |            |            |            |
|------------|-----------|----|------------|------------|------------|------------|
| cg16264526 | EDNRA;EI  | 4  | 0.00242276 | 0.73931522 | 0.65338508 | 0.49810132 |
| cg10112943 | EDNRA;EI  | 4  | 0.0008696  | 0.71277616 | 0.6549594  | 0.47327407 |
| cg05618426 | EDNRA;EI  | 4  | 0.02368354 | 0.44570168 | 0.45574663 | 0.3176319  |
| cg00133624 | EFCAB4B;  | 12 | 0.00112626 | 0.36842081 | 0.45783051 | 0.2229479  |
| cg03224812 | EFCAB4B;  | 12 | 0.0008887  | 0.62426529 | 0.46525377 | 0.3224099  |
| cg25978218 | EFHD2     | 1  | 0.01342353 | 0.84677376 | 0.87577401 | 0.70410035 |
| cg14036402 | EFHD2     | 1  | 0.00429883 | 0.71682149 | 0.78670741 | 0.58001526 |
| cg18919106 | EFR3A     | 8  | 0.01783758 | 0.37078543 | 0.37312764 | 0.26454991 |
| cg12476044 | EGFLAM;I  | 5  | 0.00177922 | 0.78470128 | 0.74991675 | 0.63402071 |
| cg08810842 | EGR3      | 8  | 0.00507512 | 0.64199942 | 0.79244196 | 0.47382409 |
| cg05150973 | EHD1      | 11 | 0.00073265 | 0.87480631 | 0.77773802 | 0.6551677  |
| cg17344040 | EHD1      | 11 | 0.0070502  | 0.58004463 | 0.55411681 | 0.39869713 |
| cg11321083 | EHD1      | 11 | 0.00398606 | 0.5137923  | 0.49240475 | 0.30466807 |
| cg00648955 | EHD3      | 2  | 0.0050226  | 0.62415955 | 0.57099191 | 0.46483949 |
| cg10071442 | EHMT2;EI  | 6  | 0.01861071 | 0.4587768  | 0.42352502 | 0.25003129 |
| cg08822118 | EIF4G1;EI | 3  | 0.0012278  | 0.63238311 | 0.5926181  | 0.45163098 |
| cg01440489 | ELF1;ELF1 | 13 | 0.0069524  | 0.50600778 | 0.50194698 | 0.27545861 |
| cg02632314 | ELF1;ELF1 | 13 | 0.00897906 | 0.56891948 | 0.55584215 | 0.36607188 |
| cg15050051 | ELFN1     | 7  | 0.00338778 | 0.72818048 | 0.70951871 | 0.58477639 |
| cg00107982 | ELFN2     | 22 | 0.00129726 | 0.29884823 | 0.31298656 | 0.16398276 |
| cg01291854 | ELK3      | 12 | 0.00066204 | 0.8149677  | 0.69396528 | 0.51327842 |
| cg26245202 | ELK4;ELK4 | 1  | 0.00374779 | 0.62831154 | 0.50663323 | 0.38759438 |
| cg01119452 | ELMO1     | 7  | 0.00433527 | 0.40919775 | 0.49980848 | 0.27434451 |
| cg08314781 | EML6      | 2  | 0.00093631 | 0.6695751  | 0.70925423 | 0.56557598 |
| cg19009132 | EMP1      | 12 | 0.00436286 | 0.81048248 | 0.77657415 | 0.66058079 |
| cg16353851 | ENC1      | 5  | 0.0019386  | 0.44472361 | 0.40607837 | 0.23832354 |
| cg11978634 | ENOX1;EN  | 13 | 0.00065949 | 0.82550801 | 0.69537515 | 0.5625867  |
| cg10332003 | ENPP6     | 4  | 0.00140062 | 0.83932326 | 0.82656141 | 0.7011603  |
| cg20623350 | ENTHD1    | 22 | 0.04089782 | 0.47684314 | 0.50936844 | 0.35769913 |
| cg21211882 | EPB41L1;I | 20 | 0.00425638 | 0.60133776 | 0.53813954 | 0.36313695 |
| cg06459104 | EPB41L3   | 18 | 0.03879786 | 0.41188847 | 0.42767749 | 0.29228836 |
| cg13678551 | EPB41L4E  | 9  | 0.00194185 | 0.44600637 | 0.3979927  | 0.29533345 |
| cg03292675 | EPB49;EP  | 8  | 0.00128133 | 0.41707676 | 0.43582684 | 0.26787178 |
| cg10835083 | EPHA4     | 2  | 0.00135325 | 0.76686536 | 0.74306799 | 0.57606416 |
| cg01970336 | EPS15     | 1  | 0.00167443 | 0.63824537 | 0.61799603 | 0.4521078  |
| cg03507641 | ERC1;ERC  | 12 | 0.01024014 | 0.34454371 | 0.31202731 | 0.19049806 |
| cg03927470 | ERCC4     | 16 | 0.00116059 | 0.89429722 | 0.87748837 | 0.75831561 |
| cg18413706 | ERG;ERG;  | 21 | 0.00344958 | 0.5743783  | 0.55442093 | 0.35544112 |
| cg22709362 | ERI3      | 1  | 0.00081789 | 0.89101771 | 0.8534088  | 0.71146052 |
| cg13582028 | ERICH1    | 8  | 0.03174689 | 0.53415318 | 0.54107161 | 0.40461554 |
| cg21211780 | ESPN      | 1  | 0.00180652 | 0.77570752 | 0.71172949 | 0.55492324 |
| cg00917101 | ESPN      | 1  | 0.00087864 | 0.48223129 | 0.48471029 | 0.29353567 |
| cg04003327 | ESPNL;SCI | 2  | 0.01446513 | 0.75445455 | 0.79060603 | 0.5691516  |
| cg06574296 | ESPNL;SCI | 2  | 0.0088828  | 0.74111879 | 0.76269878 | 0.59788327 |
| cg01395667 | ESPNP     | 1  | 0.00155548 | 0.48890002 | 0.40906903 | 0.28802688 |
| cg22364729 | ESPNP     | 1  | 0.00134844 | 0.7952736  | 0.76612004 | 0.66348423 |



|            |           |    |            |            |            |            |
|------------|-----------|----|------------|------------|------------|------------|
| cg17984400 | ESPNP     | 1  | 0.03124896 | 0.53048247 | 0.50514154 | 0.32735925 |
| cg03037684 | ESR1;ESR: | 6  | 0.00284687 | 0.49681409 | 0.4895599  | 0.34429303 |
| cg07059469 | ESR1;ESR: | 6  | 0.00137441 | 0.63438135 | 0.63845045 | 0.35286663 |
| cg21464115 | ESYT3     | 3  | 0.00201167 | 0.67194954 | 0.66316191 | 0.54791766 |
| cg21223094 | ETV6      | 12 | 0.00565829 | 0.31684414 | 0.31436988 | 0.18409884 |
| cg11655490 | ETV6      | 12 | 0.00152405 | 0.70054332 | 0.69802829 | 0.51031703 |
| cg05582310 | EVC       | 4  | 0.00993335 | 0.83353815 | 0.8222452  | 0.7180203  |
| cg20992708 | EVC2;EVC  | 4  | 0.01647542 | 0.76780273 | 0.78217368 | 0.6273644  |
| cg17526483 | EVX1      | 7  | 0.00857669 | 0.74972089 | 0.80782018 | 0.63538099 |
| cg04922154 | EVX1      | 7  | 0.00841345 | 0.66632919 | 0.70876429 | 0.49964499 |
| cg03056526 | EVX1      | 7  | 0.01792334 | 0.72036781 | 0.71651503 | 0.5333839  |
| cg13677149 | EVX1      | 7  | 0.00737637 | 0.77323519 | 0.77654752 | 0.64809298 |
| cg08483376 | EVX1      | 7  | 0.00088355 | 0.53025855 | 0.44351967 | 0.23147624 |
| cg01357429 | EVX1      | 7  | 0.00467797 | 0.537477   | 0.52378596 | 0.36054872 |
| cg22964918 | EVX1      | 7  | 0.0048797  | 0.66668678 | 0.67004474 | 0.47293744 |
| cg01544270 | EXD3      | 9  | 0.04601984 | 0.50222636 | 0.50447705 | 0.36894893 |
| cg26008509 | EXOC3L2   | 19 | 0.00072814 | 0.60502587 | 0.57273983 | 0.44815791 |
| cg10679182 | EXOC4     | 7  | 0.00149248 | 0.43804068 | 0.53395433 | 0.2334652  |
| cg19350870 | EXOC6B    | 2  | 0.03358008 | 0.72766218 | 0.72962401 | 0.61745012 |
| cg15694987 | EXT1      | 8  | 0.00070305 | 0.56636206 | 0.42940742 | 0.31540734 |
| cg00328720 | EXTL3     | 8  | 0.00154265 | 0.92746195 | 0.90853751 | 0.76853341 |
| cg22871253 | EZR;EZR   | 6  | 0.01058353 | 0.30490407 | 0.36213722 | 0.19339359 |
| cg18642576 | FA2H      | 16 | 0.01715772 | 0.85150703 | 0.82974327 | 0.71071996 |
| cg06856840 | FAH       | 15 | 0.01541996 | 0.65071143 | 0.65718859 | 0.45288729 |
| cg22511455 | FAIM3;FA  | 1  | 0.01155671 | 0.32235734 | 0.31952573 | 0.21140397 |
| cg15414028 | FAM107B   | 10 | 0.00193389 | 0.29120979 | 0.26990367 | 0.15974691 |
| cg14170976 | FAM110A   | 20 | 0.04251752 | 0.65534498 | 0.73586423 | 0.55214203 |
| cg06547285 | FAM113B   | 12 | 0.00065949 | 0.75137917 | 0.63096213 | 0.41440076 |
| cg25123566 | FAM113B   | 12 | 0.0012504  | 0.67714055 | 0.63117211 | 0.32298972 |
| cg18951135 | FAM126B   | 2  | 0.04818625 | 0.66239167 | 0.66309256 | 0.5603947  |
| cg17320378 | FAM129C   | 19 | 0.00180652 | 0.56697953 | 0.49348521 | 0.35375916 |
| cg01403030 | FAM154A   | 9  | 0.00552563 | 0.65858991 | 0.72562402 | 0.47961341 |
| cg02771117 | FAM167A   | 8  | 0.00298303 | 0.35114114 | 0.30281708 | 0.16335302 |
| cg06358322 | FAM171A   | 10 | 0.02818877 | 0.84818424 | 0.84549945 | 0.70732039 |
| cg13436110 | FAM188B   | 7  | 0.00065949 | 0.87834485 | 0.82531924 | 0.62437272 |
| cg12239580 | FAM198A   | 3  | 0.001362   | 0.57543805 | 0.46706847 | 0.36141266 |
| cg05006211 | FAM19A5   | 22 | 0.00469519 | 0.61035161 | 0.54243846 | 0.41184173 |
| cg14596108 | FAM19A5   | 22 | 0.01044005 | 0.81676014 | 0.8978291  | 0.70983864 |
| cg08859215 | FAM20A    | 17 | 0.00121234 | 0.84084713 | 0.77687692 | 0.65682728 |
| cg18069356 | FAM20A    | 17 | 0.00078623 | 0.86880058 | 0.77132247 | 0.67029283 |
| cg10183671 | FAM20C    | 7  | 0.00954906 | 0.71584967 | 0.74206534 | 0.57813622 |
| cg00167275 | FAM35A;F  | 10 | 0.00450697 | 0.20627558 | 0.20308311 | 0.09824751 |
| cg09054528 | FAM38A    | 16 | 0.03236546 | 0.58261688 | 0.57481193 | 0.44592398 |
| cg08798862 | FAM38A    | 16 | 0.00079833 | 0.8882117  | 0.83160708 | 0.72909735 |
| cg07091529 | FAM49A    | 2  | 0.01686581 | 0.88136624 | 0.87513524 | 0.74965582 |
| cg02187259 | FAM49A    | 2  | 0.01055568 | 0.87874091 | 0.88372422 | 0.7443212  |

|            |           |    |            |            |            |            |
|------------|-----------|----|------------|------------|------------|------------|
| cg17485265 | FAM50B    | 6  | 0.04568556 | 0.77697763 | 0.75423143 | 0.64396246 |
| cg03935116 | FAM60A;I  | 12 | 0.03826066 | 0.70698807 | 0.77221015 | 0.59442215 |
| cg21937128 | FAM63A;I  | 1  | 0.03235903 | 0.68365955 | 0.68248678 | 0.562816   |
| cg27050407 | FAM65B    | 6  | 0.00065949 | 0.82142701 | 0.67903784 | 0.52090702 |
| cg08893087 | FAM69A    | 1  | 0.00177922 | 0.6770526  | 0.64174228 | 0.44727928 |
| cg16689937 | FAM71D;I  | 14 | 0.00077454 | 0.47571727 | 0.43878315 | 0.2415364  |
| cg10624729 | FAM73A    | 1  | 0.00065949 | 0.88124372 | 0.82575737 | 0.69586895 |
| cg00831735 | FAM83A;I  | 8  | 0.00078196 | 0.63583981 | 0.55222288 | 0.41418124 |
| cg08256536 | FAM83A;I  | 8  | 0.00184091 | 0.70830375 | 0.65518491 | 0.50237267 |
| cg27649094 | FAM83A;I  | 8  | 0.01390004 | 0.58395842 | 0.59424611 | 0.45579545 |
| cg20283107 | FAM91A1   | 8  | 0.00471011 | 0.7876937  | 0.78038835 | 0.62936559 |
| cg22223119 | FARP1     | 13 | 0.00319723 | 0.54925382 | 0.42718435 | 0.30750864 |
| cg12570309 | FARSA     | 19 | 0.00937895 | 0.47747108 | 0.45530878 | 0.34745565 |
| cg07107113 | FBLIM1    | 1  | 0.00147208 | 0.70971014 | 0.66714626 | 0.56652507 |
| cg03531326 | FBXO17;F  | 19 | 0.02763355 | 0.68818961 | 0.70862788 | 0.58185257 |
| cg12897164 | FBXO32;F  | 8  | 0.00066204 | 0.54638028 | 0.45203748 | 0.23106344 |
| cg05904901 | FBXO41    | 2  | 0.00548311 | 0.66823419 | 0.67992287 | 0.55726355 |
| cg04973915 | FBXW11;I  | 5  | 0.00214604 | 0.73710397 | 0.70497923 | 0.58121048 |
| cg03192919 | FBXW12;I  | 3  | 0.01272421 | 0.71443693 | 0.7916479  | 0.51507245 |
| cg15565057 | FCAMR;F   | 1  | 0.01094414 | 0.59028136 | 0.61490805 | 0.41144992 |
| cg09773499 | FCER2     | 19 | 0.00545658 | 0.30145509 | 0.32149598 | 0.19884174 |
| cg19103704 | FCGBP     | 19 | 0.00183809 | 0.46076347 | 0.45171765 | 0.30991817 |
| cg04384208 | FCGR3A;F  | 1  | 0.01088059 | 0.6726408  | 0.65384202 | 0.54513454 |
| cg26435281 | FCGR3B    | 1  | 0.00438294 | 0.37120075 | 0.40496543 | 0.2181776  |
| cg09340639 | FCRL1;FCI | 1  | 0.0196961  | 0.45651152 | 0.49507894 | 0.32049948 |
| cg05777583 | FCRL2     | 1  | 0.00099652 | 0.52578861 | 0.52495719 | 0.36593204 |
| cg17134153 | FCRL3     | 1  | 0.02042436 | 0.75311339 | 0.77256517 | 0.64190483 |
| cg00160981 | FCRLB     | 1  | 0.00913085 | 0.53025265 | 0.55191738 | 0.33487381 |
| cg16174681 | FER       | 5  | 0.00115308 | 0.68770863 | 0.62201517 | 0.34837985 |
| cg20312012 | FER1L5    | 2  | 0.02394548 | 0.57616214 | 0.51284294 | 0.38064037 |
| cg20890440 | FER1L6    | 8  | 0.00085205 | 0.80485053 | 0.78243172 | 0.62990319 |
| cg15692360 | FERMT1    | 20 | 0.01060969 | 0.57760676 | 0.59293567 | 0.44003317 |
| cg13724550 | FGF1;FGF  | 5  | 0.00065949 | 0.6082571  | 0.49387757 | 0.37003563 |
| cg19746186 | FGGY;FGC  | 1  | 0.0154863  | 0.82356675 | 0.82782092 | 0.64877329 |
| cg03055021 | FHAD1     | 1  | 0.00065949 | 0.83257155 | 0.7161279  | 0.60697776 |
| cg00004700 | FHL2;FHL  | 2  | 0.0015244  | 0.91516944 | 0.89553337 | 0.76736878 |
| cg19586143 | FHOD3     | 18 | 0.03451707 | 0.7046036  | 0.78154577 | 0.60412691 |
| cg13447566 | FIBCD1;FI | 9  | 0.00154265 | 0.81454893 | 0.79838665 | 0.69398466 |
| cg19652483 | FILIP1    | 6  | 0.00101054 | 0.54327705 | 0.44189298 | 0.31611895 |
| cg11795276 | FLJ12825  | 12 | 0.03728999 | 0.4500313  | 0.44641223 | 0.33857531 |
| cg00753676 | FLJ13197  | 4  | 0.00279494 | 0.76872692 | 0.75753921 | 0.63250028 |
| cg02832512 | FLJ22536  | 6  | 0.00147518 | 0.79830155 | 0.73817189 | 0.52661496 |
| cg05925497 | FLJ32810  | 11 | 0.02362077 | 0.50144022 | 0.40545414 | 0.27543309 |
| cg19025461 | FLJ37453  | 1  | 0.00804549 | 0.74743913 | 0.7847745  | 0.57568857 |
| cg02579959 | FLJ42289; | 15 | 0.00336646 | 0.55807459 | 0.55338048 | 0.39262304 |
| cg11648730 | FLJ42709; | 5  | 0.00629918 | 0.69076567 | 0.71185222 | 0.58302696 |

|            |           |    |            |            |            |            |
|------------|-----------|----|------------|------------|------------|------------|
| cg08732466 | FLJ42875; | 1  | 0.01289231 | 0.80799201 | 0.81076234 | 0.70711356 |
| cg06991974 | FLJ42875; | 1  | 0.00714351 | 0.57613013 | 0.56292529 | 0.34975285 |
| cg07946633 | FLJ42875; | 1  | 0.0113406  | 0.53115555 | 0.49533026 | 0.35904781 |
| cg20228731 | FLJ43663; | 7  | 0.00078729 | 0.86621758 | 0.80033869 | 0.68525508 |
| cg15928106 | FLJ43663; | 7  | 0.00246645 | 0.78970721 | 0.70790689 | 0.55645393 |
| cg02122540 | FLJ43860  | 8  | 0.01729366 | 0.68288271 | 0.66637087 | 0.55274433 |
| cg11251367 | FMN2      | 1  | 0.00204505 | 0.24661626 | 0.44557345 | 0.08921483 |
| cg13966628 | FMN2      | 1  | 0.01789965 | 0.49159497 | 0.53167677 | 0.36862936 |
| cg12805374 | FMNL1     | 17 | 0.01563939 | 0.47961901 | 0.46588461 | 0.35037607 |
| cg00612751 | FMNL2     | 2  | 0.00615357 | 0.7666191  | 0.71810587 | 0.54476477 |
| cg04070601 | FMNL3;FM  | 12 | 0.00065949 | 0.50012345 | 0.43419367 | 0.30689446 |
| cg02054252 | FMNL3;FM  | 12 | 0.00407611 | 0.74357707 | 0.71913472 | 0.59193719 |
| cg22803510 | FNBP1L;F  | 1  | 0.00235711 | 0.64657455 | 0.60558789 | 0.47611572 |
| cg07739841 | FNDC1     | 6  | 0.00575247 | 0.84922921 | 0.78834046 | 0.64596476 |
| cg11637968 | FNIP2     | 4  | 0.00395998 | 0.72523528 | 0.60374623 | 0.49514331 |
| cg14513071 | FOX2;FC   | 1  | 0.00160273 | 0.85905178 | 0.78642477 | 0.65307607 |
| cg02490736 | FOX2      | 6  | 0.01760238 | 0.49673387 | 0.51243885 | 0.35110556 |
| cg15141195 | FOX2      | 6  | 0.01672645 | 0.76155886 | 0.79537467 | 0.60925723 |
| cg04261496 | FOXK1     | 7  | 0.01672645 | 0.77619655 | 0.81198036 | 0.63246566 |
| cg01808969 | FOXK1     | 7  | 0.00138693 | 0.88123002 | 0.80425645 | 0.65127046 |
| cg26958524 | FOX1      | 16 | 0.02944061 | 0.72127408 | 0.81580671 | 0.58039349 |
| cg00584450 | FOX1;FO   | 16 | 0.02519732 | 0.61286938 | 0.70401699 | 0.46235244 |
| cg10696351 | FOXO1     | 13 | 0.01842786 | 0.28926986 | 0.31298777 | 0.1875835  |
| cg02202169 | FOXO1     | 13 | 0.0331983  | 0.49568071 | 0.49977507 | 0.38364827 |
| cg06175008 | FOXP1     | 3  | 0.00855208 | 0.72474152 | 0.81588917 | 0.53701806 |
| cg17803993 | FOXP1;FC  | 3  | 0.00920255 | 0.40546457 | 0.33979346 | 0.22970427 |
| cg07368857 | FOXP1;FC  | 3  | 0.0025887  | 0.87178049 | 0.84742708 | 0.71516447 |
| cg25356639 | FOXP1;FC  | 3  | 0.00554086 | 0.80381469 | 0.77538021 | 0.61350974 |
| cg09611620 | FOXP1;FC  | 3  | 0.00079224 | 0.86397298 | 0.82334936 | 0.62527626 |
| cg13492245 | FPGS;FPG  | 9  | 0.03450675 | 0.41983859 | 0.44303806 | 0.31048733 |
| cg22152605 | FPR1      | 19 | 0.00073547 | 0.70932794 | 0.65510871 | 0.49701643 |
| cg09684112 | FRMD4A    | 10 | 0.014833   | 0.74987947 | 0.75115003 | 0.63842574 |
| cg23037642 | FRMD4A    | 10 | 0.02999866 | 0.50674324 | 0.50809918 | 0.38649558 |
| cg03355808 | FRMD4A    | 10 | 0.00213077 | 0.50388943 | 0.4903739  | 0.36662984 |
| cg11377213 | FRMD4B    | 3  | 0.00345706 | 0.43653606 | 0.39616687 | 0.20320998 |
| cg04987857 | FRS2;FRS2 | 12 | 0.01927179 | 0.47129252 | 0.41818889 | 0.31636091 |
| cg13672638 | FSD1L;FSI | 9  | 0.01287168 | 0.40942281 | 0.4523793  | 0.30181322 |
| cg19005955 | FSTL4     | 5  | 0.01495982 | 0.58468601 | 0.61154492 | 0.45652507 |
| cg02544257 | FUK       | 16 | 0.00065949 | 0.35962709 | 0.24638714 | 0.12119882 |
| cg19348484 | FURIN     | 15 | 0.01660506 | 0.53374554 | 0.54163037 | 0.34664128 |
| cg13300301 | FUT4;FUT  | 11 | 0.03729142 | 0.41192973 | 0.40865007 | 0.3041023  |
| cg17682828 | FXYD1;FX  | 19 | 0.00294511 | 0.61981801 | 0.54489482 | 0.38482506 |
| cg08130572 | FYN;FYN   | 6  | 0.00401824 | 0.65415962 | 0.66618574 | 0.42005481 |
| cg11026604 | GABRB3    | 15 | 0.02115736 | 0.7145215  | 0.71588405 | 0.57911156 |
| cg03942042 | GABRB3;C  | 15 | 0.00354864 | 0.71266899 | 0.69642564 | 0.56873185 |
| cg10311132 | GABRB3;C  | 15 | 0.00758031 | 0.37000582 | 0.43412191 | 0.24962293 |

|            |           |    |            |            |            |            |
|------------|-----------|----|------------|------------|------------|------------|
| cg24087944 | GABRD     | 1  | 0.01495982 | 0.58571724 | 0.61063387 | 0.42471159 |
| cg19816354 | GABRG3    | 15 | 0.00286384 | 0.33195905 | 0.36607045 | 0.20123071 |
| cg09205438 | GABRG3    | 15 | 0.01970757 | 0.73751501 | 0.75166572 | 0.63260129 |
| cg16741573 | GALNT1    | 18 | 0.00798815 | 0.26534251 | 0.27490029 | 0.14641827 |
| cg13579752 | GALNT10   | 5  | 0.00093631 | 0.8718734  | 0.82871176 | 0.67457213 |
| cg18311633 | GALNT13   | 2  | 0.00597656 | 0.39797497 | 0.43135168 | 0.27546848 |
| cg24308604 | GALNT7    | 4  | 0.01580869 | 0.32508129 | 0.36180514 | 0.21976776 |
| cg11334728 | GALNT9    | 12 | 0.03738486 | 0.63397111 | 0.66054278 | 0.52242286 |
| cg20076126 | GALNTL1;  | 14 | 0.00074409 | 0.63383279 | 0.47490487 | 0.34570041 |
| cg08202226 | GATAD2B   | 1  | 0.01642344 | 0.59516026 | 0.54556352 | 0.41607812 |
| cg03125765 | GATSL3    | 22 | 0.00086166 | 0.4864048  | 0.41599685 | 0.27945908 |
| cg19257864 | GBA;GBA;  | 1  | 0.00209505 | 0.22006752 | 0.21309074 | 0.10588124 |
| cg16387581 | GCH1;GCI  | 14 | 0.00830789 | 0.7741615  | 0.78699023 | 0.63512171 |
| cg18492943 | GCK       | 7  | 0.00450197 | 0.68906111 | 0.69975428 | 0.53112415 |
| cg13411789 | GCNT2     | 6  | 0.01910846 | 0.38635959 | 0.41968378 | 0.26847287 |
| cg05989312 | GCOM1;C   | 15 | 0.01539932 | 0.43344811 | 0.38997543 | 0.2458252  |
| cg04365123 | GDF6      | 8  | 0.00317531 | 0.50678842 | 0.59036745 | 0.33689901 |
| cg13002506 | GDPD4     | 11 | 0.00203531 | 0.77012113 | 0.75099293 | 0.594173   |
| cg08268692 | GDPD4     | 11 | 0.00253904 | 0.74702621 | 0.68647446 | 0.57932436 |
| cg16874185 | GDPD5     | 11 | 0.00065949 | 0.89111905 | 0.83323972 | 0.70119055 |
| cg01522592 | GDPD5     | 11 | 0.00089487 | 0.80367556 | 0.76460781 | 0.61784648 |
| cg09120267 | GEFT;GEF  | 12 | 0.0016682  | 0.66809902 | 0.63803744 | 0.52801452 |
| cg10922232 | GGA3;GG   | 17 | 0.00680102 | 0.36241301 | 0.32079198 | 0.21769663 |
| cg13053608 | GHDC;GH   | 17 | 0.03889249 | 0.63342294 | 0.64704553 | 0.5211544  |
| cg06306927 | GHDC;GH   | 17 | 0.01677529 | 0.36036051 | 0.36378378 | 0.2498189  |
| cg08468689 | GHDC;GH   | 17 | 0.00912728 | 0.39727905 | 0.41160876 | 0.23897983 |
| cg20795023 | GIMAP1    | 7  | 0.00575746 | 0.40979315 | 0.40227838 | 0.226245   |
| cg12210293 | GIMAP1    | 7  | 0.01495982 | 0.55500705 | 0.5988186  | 0.41616594 |
| cg08960815 | GIMAP4    | 7  | 0.00812661 | 0.70230694 | 0.72769007 | 0.59493333 |
| cg13043509 | GIMAP5;C  | 7  | 0.02630407 | 0.36830403 | 0.39175244 | 0.26662901 |
| cg07319528 | GIMAP5;C  | 7  | 0.01379421 | 0.49988975 | 0.54070261 | 0.39509461 |
| cg24249248 | GIMAP5;C  | 7  | 0.01149175 | 0.39786828 | 0.44318634 | 0.29559062 |
| cg15849098 | GIMAP7    | 7  | 0.02205285 | 0.80120248 | 0.79790319 | 0.68225824 |
| cg00051483 | GIMAP7    | 7  | 0.00178025 | 0.41835527 | 0.42961111 | 0.1950867  |
| cg24413842 | GIMAP7    | 7  | 0.01302012 | 0.58966504 | 0.58560678 | 0.43807787 |
| cg17643598 | GIMAP7    | 7  | 0.00158181 | 0.48017994 | 0.49418804 | 0.21407614 |
| cg25597797 | GIPC3     | 19 | 0.00160273 | 0.38094729 | 0.36045365 | 0.23715087 |
| cg07999953 | GJB3;GJB  | 1  | 0.00177922 | 0.69000943 | 0.62863697 | 0.50171749 |
| cg03568673 | GJB6;GJB  | 13 | 0.03502867 | 0.7022227  | 0.72320983 | 0.59423774 |
| cg12630277 | GJD4      | 10 | 0.0156946  | 0.65123545 | 0.6552074  | 0.54740218 |
| cg17215361 | GLB1L2    | 11 | 0.01064552 | 0.82444835 | 0.77756526 | 0.67651371 |
| cg06679990 | GLI1;GLI1 | 12 | 0.00100298 | 0.62230547 | 0.59177813 | 0.48395255 |
| cg13168314 | GLIS1     | 1  | 0.00150566 | 0.45463344 | 0.40648468 | 0.24372591 |
| cg24741609 | GLIS1     | 1  | 0.0012297  | 0.45481856 | 0.41717005 | 0.23461788 |
| cg14325112 | GLIS3;GLI | 9  | 0.00065949 | 0.76574498 | 0.62131397 | 0.44652121 |
| cg11650648 | GLP2R     | 17 | 0.00976037 | 0.70123265 | 0.67468124 | 0.56955323 |

|            |          |    |            |            |            |            |
|------------|----------|----|------------|------------|------------|------------|
| cg22689909 | GLRX;GLR | 5  | 0.00094876 | 0.33604365 | 0.32410642 | 0.10240431 |
| cg16677191 | GLRX;GLR | 5  | 0.00187198 | 0.70686785 | 0.69522524 | 0.3926717  |
| cg03852144 | GLRX;GLR | 5  | 0.00104158 | 0.23137756 | 0.1893485  | 0.07052032 |
| cg18131582 | GLT25D2  | 1  | 0.0017637  | 0.72042692 | 0.71034082 | 0.49426651 |
| cg27642528 | GLUD1    | 10 | 0.01820811 | 0.63554105 | 0.63967205 | 0.4737773  |
| cg18551877 | GLYATL2  | 11 | 0.03009647 | 0.62308272 | 0.66823738 | 0.49667212 |
| cg01708377 | GMDS     | 6  | 0.0010175  | 0.81677593 | 0.77497059 | 0.61571004 |
| cg27360210 | GMFG     | 19 | 0.01317683 | 0.73949137 | 0.76363533 | 0.61190304 |
| cg09569432 | GMFG;GN  | 19 | 0.00792881 | 0.32870486 | 0.34370411 | 0.22463798 |
| cg20650545 | GMFG;GN  | 19 | 0.01891509 | 0.39739012 | 0.40898615 | 0.28677676 |
| cg25418001 | GNAI1    | 7  | 0.01884397 | 0.64946922 | 0.64784147 | 0.48033204 |
| cg10309886 | GNASAS   | 20 | 0.00868726 | 0.74289719 | 0.78427885 | 0.54375864 |
| cg23699918 | GNASAS   | 20 | 0.00628685 | 0.79267923 | 0.79357245 | 0.68109218 |
| cg03030267 | GNASAS;N | 20 | 0.00198246 | 0.83218209 | 0.84661419 | 0.67629163 |
| cg06736148 | GNB5;GN  | 15 | 0.02766761 | 0.81002379 | 0.8041752  | 0.70308348 |
| cg08038054 | GNG11    | 7  | 0.00335524 | 0.31396558 | 0.29074993 | 0.16453973 |
| cg17168836 | GNG12    | 1  | 0.04382199 | 0.61640273 | 0.64964954 | 0.48933347 |
| cg04603130 | GNG7     | 19 | 0.00100445 | 0.23834901 | 0.27744335 | 0.11051859 |
| cg10996111 | GNL1     | 6  | 0.02168773 | 0.37700351 | 0.37972847 | 0.27024745 |
| cg15058852 | GNS      | 12 | 0.00205947 | 0.60577095 | 0.5082978  | 0.37021318 |
| cg18963763 | GOLGA7B  | 10 | 0.0012504  | 0.439796   | 0.38662309 | 0.28203146 |
| cg02389590 | GOLSYN;C | 8  | 0.04868581 | 0.48994944 | 0.4909667  | 0.38468242 |
| cg02357751 | GP1BB;SE | 22 | 0.01518408 | 0.7998773  | 0.81139933 | 0.69319915 |
| cg16210718 | GP1BB;SE | 22 | 0.01044398 | 0.70900668 | 0.73460748 | 0.5779718  |
| cg03263514 | GP1BB;SE | 22 | 0.01891633 | 0.77005598 | 0.78559171 | 0.62686145 |
| cg07359545 | GP1BB;SE | 22 | 0.01497704 | 0.55014545 | 0.6416092  | 0.43681235 |
| cg02565999 | GPC6     | 13 | 0.00093001 | 0.87938449 | 0.86103784 | 0.72312519 |
| cg09012091 | GPLD1    | 6  | 0.00840516 | 0.7052782  | 0.68138109 | 0.4898322  |
| cg19700872 | GPR151   | 5  | 0.04358513 | 0.411672   | 0.42800068 | 0.2961319  |
| cg25586410 | GPR155;C | 2  | 0.02911369 | 0.39975239 | 0.42940673 | 0.29150095 |
| cg23078123 | GPR177   | 1  | 0.00393823 | 0.70283698 | 0.67024046 | 0.54265206 |
| cg16110541 | GPR177;C | 1  | 0.0129037  | 0.77509848 | 0.77264052 | 0.65095296 |
| cg09626634 | GPR183;L | 13 | 0.00073118 | 0.59362576 | 0.47778363 | 0.35866682 |
| cg05875421 | GPR68    | 14 | 0.00109472 | 0.77616243 | 0.68514263 | 0.4332683  |
| cg23859630 | GPSM3    | 6  | 0.02389893 | 0.45166838 | 0.48593372 | 0.34048202 |
| cg26170660 | GPX5;GP> | 6  | 0.02096205 | 0.44330671 | 0.51189137 | 0.32156341 |
| cg12280901 | GPX5;GP> | 6  | 0.01074556 | 0.63658421 | 0.63707907 | 0.5251198  |
| cg11241750 | GRAMD3   | 5  | 0.04650849 | 0.40106049 | 0.40411644 | 0.26623108 |
| cg03840259 | GRAP2    | 22 | 0.03239984 | 0.68482093 | 0.72663096 | 0.58422232 |
| cg26203383 | GRAP2    | 22 | 0.00403972 | 0.69565603 | 0.71738599 | 0.4936983  |
| cg19374752 | GRASP    | 12 | 0.00146177 | 0.51218035 | 0.46864383 | 0.30630506 |
| cg06611426 | GRASP    | 12 | 0.00405622 | 0.50342082 | 0.49523911 | 0.34292777 |
| cg12358041 | GRB10;GF | 7  | 0.0008696  | 0.56433622 | 0.46952868 | 0.3458087  |
| cg13396607 | GRIK2;GR | 6  | 0.00861733 | 0.77046568 | 0.74891948 | 0.64198079 |
| cg08106961 | GRIK3    | 1  | 0.00233298 | 0.27017542 | 0.26705263 | 0.16218905 |
| cg27179693 | GRIK4    | 11 | 0.02614058 | 0.61231988 | 0.55929266 | 0.43049161 |

|            |          |    |            |            |            |            |
|------------|----------|----|------------|------------|------------|------------|
| cg24030173 | GRIN2D   | 19 | 0.01771787 | 0.65442821 | 0.67232888 | 0.53014661 |
| cg15580458 | GRK5     | 10 | 0.0097835  | 0.8184635  | 0.82552308 | 0.68873069 |
| cg22834542 | GRM5;GR  | 11 | 0.00886166 | 0.72020553 | 0.66446963 | 0.56281769 |
| cg21032008 | GRM7;GR  | 3  | 0.01561381 | 0.31407921 | 0.32107967 | 0.19147073 |
| cg24294950 | GRM8;GR  | 7  | 0.00223531 | 0.41332252 | 0.40287641 | 0.27247366 |
| cg10469791 | GRXCR1   | 4  | 0.00262855 | 0.58270925 | 0.59166475 | 0.42393085 |
| cg05316065 | GSDMC;G  | 8  | 0.00099274 | 0.29166797 | 0.27461978 | 0.17165741 |
| cg08305799 | GSR      | 8  | 0.03740936 | 0.6728709  | 0.71883244 | 0.54882913 |
| cg04340502 | GSTA3    | 6  | 0.01169892 | 0.69274772 | 0.72957646 | 0.55314252 |
| cg27343684 | GSTA3    | 6  | 0.00799281 | 0.74186636 | 0.790643   | 0.59357423 |
| cg11566152 | GTF2E1   | 3  | 0.00120369 | 0.79408101 | 0.73897708 | 0.63498925 |
| cg18325315 | GTF2IRD1 | 7  | 0.0157424  | 0.69226504 | 0.68818322 | 0.56939833 |
| cg22579828 | GTSF1L;G | 20 | 0.02775429 | 0.5655793  | 0.57745524 | 0.44755435 |
| cg24013213 | GUCY1B2  | 13 | 0.04733286 | 0.73240526 | 0.77294703 | 0.61524563 |
| cg13725803 | GUCY1B2  | 13 | 0.04550442 | 0.47316729 | 0.49170636 | 0.35584941 |
| cg24772388 | GYPC;GYF | 2  | 0.00243597 | 0.38983623 | 0.37928277 | 0.26589313 |
| cg06745001 | GYS1;GYS | 19 | 0.00149268 | 0.48710964 | 0.42821559 | 0.31944822 |
| cg18118198 | GZMB     | 14 | 0.00293735 | 0.67215354 | 0.63726187 | 0.5190658  |
| cg03875678 | GZMB     | 14 | 0.00134844 | 0.34301969 | 0.31981402 | 0.1844652  |
| cg16356013 | H2AFY;H2 | 5  | 0.00070134 | 0.86998098 | 0.79532384 | 0.6113445  |
| cg14418802 | H6PD     | 1  | 0.00163361 | 0.77189114 | 0.74845446 | 0.59692309 |
| cg03719032 | HAPLN4   | 19 | 0.01116167 | 0.52389768 | 0.53254659 | 0.40147404 |
| cg17484237 | HAVCR2;† | 5  | 0.02049456 | 0.69397415 | 0.73797766 | 0.56486301 |
| cg15371617 | HAVCR2;† | 5  | 0.00317972 | 0.65279783 | 0.71463825 | 0.48269631 |
| cg04938738 | HCCA2    | 11 | 0.00913085 | 0.76505285 | 0.75665843 | 0.5914201  |
| cg13376953 | HCCA2    | 11 | 0.00569156 | 0.54014193 | 0.52062815 | 0.32632493 |
| cg07717512 | HCG22    | 6  | 0.01853332 | 0.65886324 | 0.68874711 | 0.51479573 |
| cg05615856 | HCG27    | 6  | 0.04213177 | 0.42495121 | 0.4066017  | 0.25388953 |
| cg09470907 | HCG4P6   | 6  | 0.03735894 | 0.49764637 | 0.55296918 | 0.34027296 |
| cg21026460 | HDAC11;† | 3  | 0.00280852 | 0.88896379 | 0.89236618 | 0.77025395 |
| cg05997414 | HDAC4    | 2  | 0.01400131 | 0.62858733 | 0.63152338 | 0.42795434 |
| cg09681977 | HDAC4    | 2  | 0.0140889  | 0.58890703 | 0.68066367 | 0.4841595  |
| cg26876664 | HDAC4    | 2  | 0.00587915 | 0.73627854 | 0.78148815 | 0.63340489 |
| cg00332048 | HDAC9;HI | 7  | 0.00264473 | 0.39716189 | 0.36146056 | 0.22804345 |
| cg23280720 | HECA     | 6  | 0.00081599 | 0.84190664 | 0.80080044 | 0.64106737 |
| cg01213645 | HECW1    | 7  | 0.00140256 | 0.87429125 | 0.81439488 | 0.70867163 |
| cg08338478 | HECW2    | 2  | 0.00616957 | 0.55990622 | 0.71087082 | 0.45139348 |
| cg09907068 | HECW2    | 2  | 0.00420965 | 0.85473677 | 0.82044715 | 0.66212746 |
| cg11029367 | HEG1     | 3  | 0.00168532 | 0.80202117 | 0.76743004 | 0.51623864 |
| cg09317502 | HEPACAN  | 7  | 0.01502763 | 0.45241327 | 0.49861541 | 0.31744774 |
| cg02544502 | HEPACAN  | 7  | 0.03954748 | 0.42429122 | 0.45962618 | 0.30973655 |
| cg14091419 | HERC2    | 15 | 0.02720807 | 0.79704363 | 0.77429799 | 0.67246093 |
| cg24495350 | HEXA     | 15 | 0.00103697 | 0.85190781 | 0.8207514  | 0.70704902 |
| cg03301084 | HEY1;HEY | 8  | 0.00480767 | 0.44821018 | 0.38879018 | 0.26371521 |
| cg15567428 | HGF;HGF; | 7  | 0.00257075 | 0.4533262  | 0.5132185  | 0.28319593 |
| cg08449639 | HIC2     | 22 | 0.01411406 | 0.460912   | 0.48526987 | 0.3478395  |

|            |          |    |            |            |            |            |
|------------|----------|----|------------|------------|------------|------------|
| cg14277677 | HIP1R    | 12 | 0.00065949 | 0.67006035 | 0.55314583 | 0.43265581 |
| cg01171339 | HIST1H2A | 6  | 0.00911882 | 0.64005739 | 0.63874611 | 0.49309773 |
| cg05519606 | HIVEP2   | 6  | 0.00089487 | 0.59024512 | 0.44303326 | 0.31819946 |
| cg17892259 | HIVEP3;H | 1  | 0.02448461 | 0.73456411 | 0.75945302 | 0.5709375  |
| cg10054398 | HIVEP3;H | 1  | 0.00380612 | 0.77694393 | 0.78484729 | 0.59237099 |
| cg13423554 | HIVEP3;H | 1  | 0.01488167 | 0.39137143 | 0.34252418 | 0.22790551 |
| cg05595692 | HK2      | 2  | 0.01817172 | 0.70660167 | 0.7515916  | 0.54086899 |
| cg08039587 | HLA-A    | 6  | 0.01023819 | 0.61970908 | 0.63821899 | 0.4761404  |
| cg22731440 | HLA-B    | 6  | 0.04638701 | 0.76065229 | 0.67699756 | 0.54620036 |
| cg05281796 | HLA-DOA  | 6  | 0.00617318 | 0.59545503 | 0.59263829 | 0.48588175 |
| cg11451043 | HLA-DPA1 | 6  | 0.00387262 | 0.36209366 | 0.47728437 | 0.24715171 |
| cg12365667 | HLA-DPB1 | 6  | 0.03771398 | 0.40241632 | 0.47045171 | 0.29254061 |
| cg00334532 | HLA-DQA1 | 6  | 0.00499353 | 0.82678654 | 0.80067079 | 0.69805545 |
| cg10989981 | HLA-DQB1 | 6  | 0.01891191 | 0.6370285  | 0.63545038 | 0.45460937 |
| cg06499030 | HLA-DQB1 | 6  | 0.00359037 | 0.35249456 | 0.35448962 | 0.21206405 |
| cg25046571 | HLA-G    | 6  | 0.03708299 | 0.60309544 | 0.58542461 | 0.29923641 |
| cg15595495 | HLA-G    | 6  | 0.03208512 | 0.79777695 | 0.80570074 | 0.67795463 |
| cg18645081 | HLX      | 1  | 0.01512979 | 0.53902898 | 0.5792546  | 0.36682087 |
| cg25207224 | HMGA1;H  | 6  | 0.03349395 | 0.73383898 | 0.7291254  | 0.60444084 |
| cg02123091 | HMGA2;H  | 12 | 0.00065949 | 0.85227524 | 0.74242699 | 0.63822142 |
| cg02423080 | HMGXB3   | 5  | 0.01678972 | 0.39596483 | 0.4160932  | 0.27817751 |
| cg02753354 | HMHA1    | 19 | 0.02917135 | 0.44733744 | 0.45967305 | 0.33796384 |
| cg10655396 | HMHA1    | 19 | 0.0106654  | 0.38765706 | 0.41368198 | 0.27037112 |
| cg14478768 | HMHA1    | 19 | 0.01021896 | 0.6040719  | 0.59010774 | 0.48432918 |
| cg09560590 | HMHB1    | 5  | 0.00503527 | 0.68943639 | 0.75513618 | 0.54359157 |
| cg04225775 | HMHB1;H  | 5  | 0.00434951 | 0.65403018 | 0.71178385 | 0.47557841 |
| cg17573720 | HOTAIR   | 12 | 0.01169892 | 0.43017841 | 0.47730912 | 0.27571824 |
| cg18824990 | HOTAIR   | 12 | 0.03561451 | 0.71239337 | 0.76369389 | 0.60511413 |
| cg16006349 | HOTAIR   | 12 | 0.00585213 | 0.79893975 | 0.84475854 | 0.64384193 |
| cg08941355 | HOXA1;H  | 7  | 0.0286529  | 0.79379967 | 0.81774308 | 0.68636621 |
| cg20994254 | HOXA11A  | 7  | 0.04928347 | 0.72089059 | 0.77132257 | 0.60181482 |
| cg12147489 | HOXA11A  | 7  | 0.01304683 | 0.4920637  | 0.44917127 | 0.29883642 |
| cg06587155 | HOXA11A  | 7  | 0.0457117  | 0.46047053 | 0.45764929 | 0.34836561 |
| cg26511321 | HOXA7    | 7  | 0.01092179 | 0.437881   | 0.45995443 | 0.30423485 |
| cg00524443 | HOXB3    | 17 | 0.00553981 | 0.50200171 | 0.48141577 | 0.3693323  |
| cg10165801 | HOXB3    | 17 | 0.01980843 | 0.56460282 | 0.53190528 | 0.41557066 |
| cg04014328 | HOXB4    | 17 | 0.00816896 | 0.55346557 | 0.51445428 | 0.40151253 |
| cg10366797 | HOXC4    | 12 | 0.02956308 | 0.80240054 | 0.84952624 | 0.66507806 |
| cg26201952 | HOXC4;H  | 12 | 0.00521564 | 0.60551862 | 0.7144427  | 0.48177115 |
| cg05992786 | HOXC4;H  | 12 | 0.03346287 | 0.7115689  | 0.71188462 | 0.57876709 |
| cg09720701 | HOXC4;H  | 12 | 0.00412385 | 0.47574942 | 0.43143852 | 0.30914962 |
| cg11585893 | HOXC4;H  | 12 | 0.00910614 | 0.58366543 | 0.57931585 | 0.3878049  |
| cg07266404 | HOXC4;H  | 12 | 0.01120433 | 0.57943784 | 0.52580484 | 0.42412491 |
| cg22747076 | HOXC4;H  | 12 | 0.00742728 | 0.70600119 | 0.67681675 | 0.54906514 |
| cg11746813 | HOXC4;H  | 12 | 0.03333586 | 0.60193978 | 0.57285071 | 0.43506329 |
| cg11597131 | HOXD9    | 2  | 0.01263862 | 0.43929064 | 0.47056161 | 0.31342937 |

|            |             |    |            |            |            |            |
|------------|-------------|----|------------|------------|------------|------------|
| cg19373813 | HOXD9       | 2  | 0.00260525 | 0.3656316  | 0.38315227 | 0.20591944 |
| cg11938718 | HPCAL1;H    | 2  | 0.0331983  | 0.66617777 | 0.6390316  | 0.52679427 |
| cg24715735 | HPN;HPN     | 19 | 0.02944061 | 0.43141077 | 0.46772566 | 0.3217902  |
| cg06151964 | HPN;HPN     | 19 | 0.01838071 | 0.60814432 | 0.63401773 | 0.43674194 |
| cg12183501 | HPS3        | 3  | 0.02108987 | 0.78674289 | 0.83477986 | 0.67551081 |
| cg16745930 | HPSE2;HP    | 10 | 0.00203531 | 0.70433238 | 0.68201451 | 0.51941795 |
| cg09837116 | HRNBP3      | 17 | 0.00083329 | 0.54904883 | 0.54089575 | 0.42647238 |
| cg01944110 | HS3ST1      | 4  | 0.03301459 | 0.80237687 | 0.85534593 | 0.70038496 |
| cg18192491 | HS3ST5      | 6  | 0.0106258  | 0.71647119 | 0.71353561 | 0.59913733 |
| cg16684691 | HS6ST3      | 13 | 0.00160642 | 0.49475247 | 0.50705064 | 0.32040855 |
| cg09894383 | HSD17B2     | 16 | 0.02215534 | 0.47985754 | 0.5100195  | 0.36964667 |
| cg24888257 | HSPA1A;H    | 6  | 0.00248169 | 0.62854237 | 0.58593913 | 0.448353   |
| cg15888097 | HTR1E       | 6  | 0.00576163 | 0.39982013 | 0.41874686 | 0.2772072  |
| cg08273233 | HTR1E       | 6  | 0.00101815 | 0.70033201 | 0.66466638 | 0.55231862 |
| cg08372315 | HTR3A;H1    | 11 | 0.01933517 | 0.56559578 | 0.62244995 | 0.44700932 |
| cg01459748 | HTR3B       | 11 | 0.00667841 | 0.62295498 | 0.66618646 | 0.4995048  |
| cg23791011 | HTRA1       | 10 | 0.0022585  | 0.77979399 | 0.70918993 | 0.43192054 |
| cg00701951 | HTRA1       | 10 | 0.00177922 | 0.86635382 | 0.84116418 | 0.64557767 |
| cg11157691 | HTRA1       | 10 | 0.00168532 | 0.8288142  | 0.79023025 | 0.56404768 |
| cg15719652 | HTRA1       | 10 | 0.00097337 | 0.89407485 | 0.82468978 | 0.67632805 |
| cg21184369 | HTRA4;PL    | 8  | 0.00123883 | 0.67705583 | 0.75866831 | 0.43910348 |
| cg21121843 | HTT         | 4  | 0.00264208 | 0.83418437 | 0.79619687 | 0.62196748 |
| cg12793803 | ICAM2;IC    | 17 | 0.00488333 | 0.55410733 | 0.59128773 | 0.44180412 |
| cg15391590 | ICK;ICK     | 6  | 0.02527866 | 0.83439259 | 0.88039234 | 0.72796466 |
| cg21440776 | IFFO1;IFF   | 12 | 0.00520168 | 0.73726246 | 0.6669884  | 0.510804   |
| cg01342196 | IFI16       | 1  | 0.00199536 | 0.74870552 | 0.64492543 | 0.50290375 |
| cg07463059 | IFI16;IFI1  | 1  | 0.0022221  | 0.65360528 | 0.65222048 | 0.36087997 |
| cg20597486 | IFI16;IFI1  | 1  | 0.01196286 | 0.76497243 | 0.79384697 | 0.55202393 |
| cg16341979 | IFI27;IFI2  | 14 | 0.00375204 | 0.75307552 | 0.72157622 | 0.59177783 |
| cg24979161 | IFI27L1;IF  | 14 | 0.00112793 | 0.83461416 | 0.78492116 | 0.64543198 |
| cg17980508 | IFI44L      | 1  | 0.00660543 | 0.48289854 | 0.45287156 | 0.25907801 |
| cg01911529 | IFI6;IFI6;I | 1  | 0.00468024 | 0.91296061 | 0.88931269 | 0.78249448 |
| cg27478224 | IFIT2       | 10 | 0.01089189 | 0.24197998 | 0.2364414  | 0.12670379 |
| cg27027427 | IFIT3;IFIT  | 10 | 0.01102429 | 0.31531139 | 0.25837206 | 0.12533804 |
| cg08173915 | IFNGR2      | 21 | 0.04136151 | 0.759595   | 0.79887221 | 0.63919286 |
| cg19724567 | IFRD1       | 7  | 0.00446647 | 0.60152349 | 0.58683145 | 0.41315895 |
| cg05526364 | IFT122;IFT  | 3  | 0.00070134 | 0.73754279 | 0.6661746  | 0.47656582 |
| cg03163545 | IFT140;TM   | 16 | 0.00291147 | 0.70065498 | 0.62667674 | 0.40288023 |
| cg08761208 | IGDCC4      | 15 | 0.00362881 | 0.60311896 | 0.64385165 | 0.44681503 |
| cg26579713 | IGDCC4      | 15 | 0.00392454 | 0.73612366 | 0.72586883 | 0.39480082 |
| cg25924694 | IGF1;IGF1   | 12 | 0.02818766 | 0.38405863 | 0.34376534 | 0.23768378 |
| cg26577252 | IGF1R       | 15 | 0.00796332 | 0.57776682 | 0.62602014 | 0.36391827 |
| cg27139419 | IGF1R       | 15 | 0.01321271 | 0.84630795 | 0.85024629 | 0.74090139 |
| cg18158670 | IGF1R       | 15 | 0.00327239 | 0.86651897 | 0.80744722 | 0.68901609 |
| cg19131227 | IGF2AS;IN   | 11 | 0.01010631 | 0.76664382 | 0.72095873 | 0.59909721 |
| cg05323345 | IGF2AS;IN   | 11 | 0.01678444 | 0.73456382 | 0.7588295  | 0.57266768 |



|            |            |    |            |            |            |            |
|------------|------------|----|------------|------------|------------|------------|
| cg05777976 | IGF2AS;IN  | 11 | 0.00160583 | 0.52841952 | 0.5880099  | 0.28060359 |
| cg02425416 | IGF2AS;IN  | 11 | 0.0097133  | 0.70371454 | 0.71328047 | 0.46829933 |
| cg12877935 | IGF2AS;IN  | 11 | 0.00966232 | 0.42510528 | 0.44935406 | 0.28160059 |
| cg11005826 | IGF2AS;IN  | 11 | 0.01073914 | 0.55863723 | 0.61688269 | 0.41233051 |
| cg07060794 | IGF2BP3    | 7  | 0.02432105 | 0.81988382 | 0.82204632 | 0.64794412 |
| cg17209188 | IGF2BP3    | 7  | 0.01045915 | 0.81465867 | 0.8012984  | 0.66442403 |
| cg21025494 | IGF2BP3    | 7  | 0.00486472 | 0.66812688 | 0.68974407 | 0.4909545  |
| cg25754852 | IGF2R      | 6  | 0.00093055 | 0.74974129 | 0.6860781  | 0.5831953  |
| cg17980404 | IGFBP4     | 17 | 0.00160451 | 0.74234146 | 0.62013235 | 0.40287844 |
| cg06559575 | IGFBP6     | 12 | 0.00068904 | 0.42963972 | 0.33191804 | 0.16343395 |
| cg10923036 | IGFBP7     | 4  | 0.00073265 | 0.49818055 | 0.43398496 | 0.27149433 |
| cg15696506 | IGFBP7     | 4  | 0.00526523 | 0.26994584 | 0.29100885 | 0.16143764 |
| cg13840174 | IGSF21     | 1  | 0.00247271 | 0.66326108 | 0.6636477  | 0.50958842 |
| cg05468843 | IL10RA;IL1 | 11 | 0.01093065 | 0.50106625 | 0.50057972 | 0.37817245 |
| cg09577367 | IL12RB1;IL | 19 | 0.0212437  | 0.51227392 | 0.52426352 | 0.3826732  |
| cg01574571 | IL12RB1;IL | 19 | 0.01857513 | 0.59384552 | 0.62257987 | 0.46814935 |
| cg12123019 | IL12RB1;IL | 19 | 0.00735604 | 0.60428359 | 0.6428988  | 0.5008307  |
| cg16324121 | IL17RE;IL1 | 3  | 0.03170823 | 0.67539013 | 0.69040085 | 0.51304565 |
| cg00090674 | IL17REL    | 22 | 0.00521564 | 0.78973076 | 0.78498253 | 0.68376532 |
| cg01522296 | IL17REL    | 22 | 0.00816896 | 0.7775404  | 0.79315608 | 0.6676618  |
| cg12380764 | IL19       | 1  | 0.01678972 | 0.56870211 | 0.58117806 | 0.42468987 |
| cg00839584 | IL1A;IL1A  | 2  | 0.03875896 | 0.55372142 | 0.57520626 | 0.44968683 |
| cg02229946 | IL1F7;IL1F | 2  | 0.00828598 | 0.66574606 | 0.67391814 | 0.54523019 |
| cg25065535 | IL2        | 4  | 0.04742879 | 0.46472291 | 0.49449196 | 0.3492085  |
| cg02656594 | IL21R      | 16 | 0.03110358 | 0.57411412 | 0.57922667 | 0.44204848 |
| cg05814654 | IL21R;IL21 | 16 | 0.03699135 | 0.43024951 | 0.46734056 | 0.31881219 |
| cg23507945 | IL22RA2;IL | 6  | 0.01094414 | 0.82083662 | 0.82493485 | 0.65907444 |
| cg22788465 | IL3        | 5  | 0.00276855 | 0.51815882 | 0.51884424 | 0.35037231 |
| cg05265849 | IL6        | 7  | 0.02923471 | 0.36163016 | 0.36146418 | 0.25427524 |
| cg07363330 | IL31RA     | 5  | 0.00779924 | 0.60928126 | 0.57982479 | 0.38911772 |
| cg04245540 | IL31RA     | 5  | 0.00283173 | 0.29147213 | 0.24094326 | 0.12672558 |
| cg16649560 | IL4R;IL4R  | 16 | 0.00078819 | 0.52884707 | 0.44731078 | 0.24702329 |
| cg04312209 | IL7R       | 5  | 0.00507632 | 0.4835313  | 0.41358329 | 0.30527718 |
| cg24833674 | ILDR2      | 1  | 0.00662513 | 0.80697818 | 0.85675802 | 0.69833869 |
| cg08065733 | INHBB      | 2  | 0.02103823 | 0.40822907 | 0.42197274 | 0.29987411 |
| cg06760238 | INPP5A     | 10 | 0.0212437  | 0.63798543 | 0.65165146 | 0.43478539 |
| cg03438101 | INPP5A     | 10 | 0.03136149 | 0.61898507 | 0.63934991 | 0.49474098 |
| cg07185664 | INPP5K;IN  | 17 | 0.00901377 | 0.71493214 | 0.74267857 | 0.55499517 |
| cg04057455 | INS-IGF2;I | 11 | 0.00295889 | 0.75298544 | 0.72559207 | 0.6175132  |
| cg02742555 | INSC;INSC  | 11 | 0.00206218 | 0.50823292 | 0.53406353 | 0.29245586 |
| cg08129092 | INTS3      | 1  | 0.0051141  | 0.38757918 | 0.40226025 | 0.26003963 |
| cg16932472 | IPO5;IPO5  | 13 | 0.00202182 | 0.55707247 | 0.54146656 | 0.40743254 |
| cg22677858 | IPO9       | 1  | 0.00101054 | 0.37047819 | 0.35593543 | 0.18868518 |
| cg26915799 | IPO9       | 1  | 0.02075286 | 0.80217804 | 0.79426286 | 0.66825516 |
| cg18527651 | IRAK2      | 3  | 0.04357378 | 0.71650606 | 0.73914304 | 0.59854023 |
| cg16478536 | IRF4       | 6  | 0.00806542 | 0.32958627 | 0.35617177 | 0.21974569 |

|            |            |    |            |            |            |            |
|------------|------------|----|------------|------------|------------|------------|
| cg07955474 | IRF8       | 16 | 0.00186737 | 0.68138434 | 0.68070318 | 0.55520548 |
| cg04599946 | IRF8       | 16 | 0.01447617 | 0.35570023 | 0.34238613 | 0.23696992 |
| cg25312054 | IRS2       | 13 | 0.00164959 | 0.86465668 | 0.76724318 | 0.64732668 |
| cg01901262 | IRX5       | 16 | 0.00163822 | 0.30004225 | 0.31143214 | 0.1970704  |
| cg10824810 | IRX5       | 16 | 0.00218291 | 0.75367507 | 0.70712562 | 0.49930716 |
| cg02198701 | IRX6       | 16 | 0.01164124 | 0.53711213 | 0.55864864 | 0.42123924 |
| cg26293019 | ISL1       | 5  | 0.00184545 | 0.53918132 | 0.51646783 | 0.31698869 |
| cg24488317 | ISM1       | 20 | 0.00066204 | 0.72046531 | 0.62021046 | 0.48800082 |
| cg19185637 | ITGA11     | 15 | 0.00113844 | 0.79685151 | 0.68480329 | 0.57168203 |
| cg09828265 | ITGA9      | 3  | 0.01021212 | 0.45549812 | 0.43509346 | 0.29596454 |
| cg08821998 | ITGA9      | 3  | 0.00380612 | 0.72959609 | 0.61260387 | 0.48900566 |
| cg02225720 | ITGAE      | 17 | 0.00129639 | 0.57084273 | 0.48840171 | 0.23159898 |
| cg22699620 | ITGB2;ITG  | 21 | 0.00131453 | 0.35787468 | 0.29930823 | 0.18953859 |
| cg10753610 | ITGB3      | 17 | 0.00798815 | 0.46914373 | 0.50455465 | 0.25277953 |
| cg00871980 | ITGB5      | 3  | 0.00341932 | 0.53089654 | 0.47998877 | 0.31421686 |
| cg00171092 | ITGB5      | 3  | 0.00921039 | 0.58105966 | 0.61786862 | 0.44166313 |
| cg26689077 | ITGB7      | 12 | 0.00200529 | 0.41579249 | 0.34062001 | 0.22807463 |
| cg11838152 | ITGBL1     | 13 | 0.00225672 | 0.80917572 | 0.81202292 | 0.5707773  |
| cg24628310 | ITIH1;ITIH | 3  | 0.01096214 | 0.55430116 | 0.55776029 | 0.42898141 |
| cg05480883 | ITIH5;ITIH | 10 | 0.00105291 | 0.29059657 | 0.22751066 | 0.11738832 |
| cg08972954 | ITK        | 5  | 0.04671332 | 0.52335519 | 0.57569895 | 0.38576024 |
| cg10094191 | ITLN1      | 1  | 0.00487618 | 0.67556016 | 0.68942443 | 0.56552978 |
| cg14181956 | ITPK1;ITP  | 14 | 0.04646611 | 0.73553542 | 0.76787401 | 0.63246349 |
| cg22999830 | ITPK1;ITP  | 14 | 0.03119297 | 0.82110082 | 0.84718371 | 0.70582428 |
| cg11600734 | ITPR1;ITP  | 3  | 0.02053379 | 0.74164143 | 0.75867648 | 0.55931005 |
| cg02799411 | ITPR1;ITP  | 3  | 0.03359449 | 0.76540617 | 0.77822659 | 0.64593993 |
| cg05795849 | ITPR1;ITP  | 3  | 0.0097133  | 0.37112661 | 0.36376901 | 0.19619129 |
| cg25552843 | ITPRIP     | 10 | 0.00591291 | 0.73388612 | 0.75238137 | 0.59012853 |
| cg19640166 | ITPRIP     | 10 | 0.0037901  | 0.81424425 | 0.81730617 | 0.65978532 |
| cg16636756 | ITPRIP     | 10 | 0.01946986 | 0.71904547 | 0.75196893 | 0.58295664 |
| cg22888181 | ITPRIP     | 10 | 0.00122881 | 0.72580898 | 0.66255889 | 0.39214589 |
| cg24199006 | ITPRIP     | 10 | 0.00195    | 0.61259203 | 0.52329474 | 0.33927433 |
| cg05335315 | JAG2;JAG   | 14 | 0.00281199 | 0.38107218 | 0.41403106 | 0.22702205 |
| cg13250024 | JAKMIP3    | 10 | 0.02474533 | 0.86615359 | 0.8690834  | 0.7542007  |
| cg13623749 | JARID2     | 6  | 0.02271157 | 0.69529006 | 0.6835812  | 0.51783824 |
| cg26797722 | JARID2     | 6  | 0.00066232 | 0.80016356 | 0.74840859 | 0.54623165 |
| cg12230983 | JARID2     | 6  | 0.02009829 | 0.79743114 | 0.84112914 | 0.69581673 |
| cg01675238 | JMJD7-PL   | 15 | 0.00085205 | 0.48931006 | 0.35091917 | 0.2070137  |
| cg12024811 | KALRN;KA   | 3  | 0.00126466 | 0.80426377 | 0.73452043 | 0.59179513 |
| cg10464130 | KALRN;KA   | 3  | 0.00073118 | 0.60667726 | 0.50337328 | 0.38314277 |
| cg25250013 | KANK2;KA   | 19 | 0.00077468 | 0.56337696 | 0.44333784 | 0.29810179 |
| cg20916427 | KATNAL2    | 18 | 0.02368354 | 0.71351848 | 0.74055946 | 0.57152735 |
| cg13925011 | KCNA3      | 1  | 0.01645394 | 0.65745653 | 0.66691083 | 0.52580497 |
| cg04063166 | KCNA4      | 11 | 0.00252115 | 0.51381201 | 0.59422503 | 0.38692143 |
| cg03553947 | KCNA4      | 11 | 0.01064534 | 0.7345547  | 0.71604588 | 0.61214174 |
| cg25508319 | KCNJ5      | 11 | 0.02332665 | 0.72885799 | 0.74075968 | 0.50682135 |

|            |          |    |            |            |            |            |
|------------|----------|----|------------|------------|------------|------------|
| cg16739441 | KCNJ8    | 12 | 0.01775699 | 0.3109984  | 0.33708338 | 0.20073503 |
| cg07699454 | KCNK17;K | 6  | 0.00109306 | 0.81721192 | 0.78726131 | 0.65913199 |
| cg01627597 | KCNK3    | 2  | 0.00092849 | 0.4923467  | 0.46067257 | 0.32522795 |
| cg23107301 | KCNMA1;  | 10 | 0.00629716 | 0.69630588 | 0.68256298 | 0.5570724  |
| cg26615853 | KCNMA1;  | 10 | 0.00103895 | 0.89784652 | 0.88923792 | 0.76416552 |
| cg22646937 | KCNMB1;  | 5  | 0.00184569 | 0.51927202 | 0.49223777 | 0.32279827 |
| cg04534404 | KCNMB2;  | 3  | 0.0347271  | 0.78147232 | 0.7662987  | 0.66113137 |
| cg05343739 | KCNN3;K  | 1  | 0.0019957  | 0.43387239 | 0.33160577 | 0.2256952  |
| cg10503610 | KCNN3;K  | 1  | 0.00951557 | 0.66715671 | 0.63472554 | 0.5146332  |
| cg08895013 | KCNQ1    | 11 | 0.02987215 | 0.646089   | 0.67558179 | 0.54598008 |
| cg18729298 | KCNQ1;K  | 11 | 0.00806542 | 0.49332259 | 0.48727504 | 0.37901649 |
| cg07824422 | KCNQ1;K  | 11 | 0.00325324 | 0.5156602  | 0.57033779 | 0.35046451 |
| cg16083838 | KCNQ1DN  | 11 | 0.01666517 | 0.74063119 | 0.75564457 | 0.52754383 |
| cg22675922 | KCNQ1DN  | 11 | 0.02700619 | 0.64020414 | 0.70182109 | 0.53579626 |
| cg01923099 | KCNQ1DN  | 11 | 0.00359037 | 0.54348705 | 0.54582535 | 0.33185467 |
| cg07439128 | KCNQ1DN  | 11 | 0.01124644 | 0.66780443 | 0.67321147 | 0.45796252 |
| cg05656180 | KCNQ1DN  | 11 | 0.00302287 | 0.38584438 | 0.3415671  | 0.24078292 |
| cg15746253 | KCNQ3    | 8  | 0.0048146  | 0.76677935 | 0.78989411 | 0.62476678 |
| cg16856453 | KCNS1    | 20 | 0.00381594 | 0.44169595 | 0.42666403 | 0.2765973  |
| cg13730736 | KCNT1    | 9  | 0.0019957  | 0.46651642 | 0.46774918 | 0.32030599 |
| cg24193140 | KCTD16   | 5  | 0.00101054 | 0.76609966 | 0.6855268  | 0.58551314 |
| cg09185884 | KCTD2    | 17 | 0.0025513  | 0.39534072 | 0.306848   | 0.18029433 |
| cg09175485 | KDM2A;K  | 11 | 0.0047315  | 0.56067896 | 0.49342953 | 0.3115756  |
| cg17416338 | KDM4B    | 19 | 0.03699135 | 0.62471307 | 0.67772175 | 0.44528515 |
| cg14498745 | KEL      | 7  | 0.0135118  | 0.7301407  | 0.70699345 | 0.59749623 |
| cg21031917 | KHDRBS2  | 6  | 0.00236052 | 0.51146949 | 0.4641626  | 0.33567427 |
| cg24471894 | KIAA0020 | 9  | 0.00211366 | 0.43574232 | 0.38916641 | 0.20334028 |
| cg16051718 | KIAA0232 | 4  | 0.03599253 | 0.6601945  | 0.72335125 | 0.54410536 |
| cg01557792 | KIAA0247 | 14 | 0.01966195 | 0.65294351 | 0.67480514 | 0.52384381 |
| cg26311501 | KIAA0831 | 14 | 0.02683244 | 0.39120544 | 0.35560122 | 0.25129799 |
| cg16328023 | KIAA0895 | 7  | 0.00197515 | 0.41412966 | 0.39098755 | 0.22043911 |
| cg02927252 | KIAA1026 | 1  | 0.01216006 | 0.77888596 | 0.81599392 | 0.67434585 |
| cg00101629 | KIAA1026 | 1  | 0.00578816 | 0.74687817 | 0.66335771 | 0.53963368 |
| cg16689761 | KIAA1147 | 7  | 0.02488364 | 0.78150901 | 0.78187349 | 0.64484012 |
| cg21282282 | KIAA1324 | 1  | 0.00997311 | 0.48848141 | 0.53265453 | 0.29926269 |
| cg01827195 | KIAA1486 | 2  | 0.00667685 | 0.34367693 | 0.35897195 | 0.18703057 |
| cg22417613 | KIAA1549 | 7  | 0.02377716 | 0.79541728 | 0.80523365 | 0.65872424 |
| cg08908131 | KIAA1598 | 10 | 0.00141699 | 0.65371589 | 0.54788353 | 0.41938125 |
| cg11165619 | KIAA1644 | 22 | 0.00070678 | 0.80005055 | 0.71743758 | 0.59193083 |
| cg02687592 | KIAA1644 | 22 | 0.0033048  | 0.82705139 | 0.79725121 | 0.69178774 |
| cg10759286 | KIAA1751 | 1  | 0.02729523 | 0.44004771 | 0.46111765 | 0.33715044 |
| cg08420066 | KIAA1949 | 6  | 0.00861733 | 0.40533307 | 0.38354927 | 0.26655626 |
| cg20690667 | KIAA1949 | 6  | 0.0088759  | 0.40761779 | 0.39574501 | 0.24599962 |
| cg24967096 | KIAA1949 | 6  | 0.00336153 | 0.28339932 | 0.27401097 | 0.16218379 |
| cg05098566 | KIAA1949 | 6  | 0.00899594 | 0.65493394 | 0.61665975 | 0.47583357 |
| cg15768443 | KIAA1949 | 6  | 0.01068625 | 0.51234607 | 0.50385297 | 0.3772673  |

|            |           |    |            |            |            |            |
|------------|-----------|----|------------|------------|------------|------------|
| cg08887400 | KIAA1949  | 6  | 0.00783809 | 0.3884505  | 0.35596619 | 0.22960721 |
| cg03953626 | KIAA1949  | 6  | 0.01291157 | 0.4589786  | 0.44657561 | 0.30749936 |
| cg18586886 | KIAA1949  | 6  | 0.01026108 | 0.50681496 | 0.4813915  | 0.31969025 |
| cg18427856 | KIAA1949  | 6  | 0.00408071 | 0.54034742 | 0.46714611 | 0.2827865  |
| cg01413582 | KIAA1949  | 6  | 0.00213077 | 0.32025887 | 0.27250905 | 0.16705629 |
| cg00278359 | KIAA1949  | 6  | 0.00171661 | 0.45871275 | 0.35378832 | 0.22321493 |
| cg12036303 | KIAA1949  | 6  | 0.00140274 | 0.68246232 | 0.60828261 | 0.37506826 |
| cg00010853 | KIAA1949  | 6  | 0.00178025 | 0.62168735 | 0.62765171 | 0.4082539  |
| cg11554650 | KIAA1949  | 6  | 0.00130462 | 0.7391302  | 0.66333643 | 0.52296211 |
| cg12105190 | KIAA1949  | 6  | 0.00100376 | 0.64443593 | 0.57302349 | 0.3627053  |
| cg25980484 | KIAA1949  | 6  | 0.00463727 | 0.36126457 | 0.33316476 | 0.23202179 |
| cg03052182 | KIAA1949  | 6  | 0.00302211 | 0.38195854 | 0.3479097  | 0.23298688 |
| cg01662942 | KIF1A     | 2  | 0.00523353 | 0.81219626 | 0.74221449 | 0.61592784 |
| cg11802797 | KIF1B     | 1  | 0.00429569 | 0.5720761  | 0.58603416 | 0.35264813 |
| cg21477075 | KIF25;KIF | 6  | 0.0021933  | 0.86271515 | 0.86398449 | 0.73664803 |
| cg18234115 | KIF26B    | 1  | 0.02630407 | 0.73659934 | 0.75559529 | 0.62086815 |
| cg15358723 | KIF26B    | 1  | 0.00343258 | 0.79790268 | 0.80970549 | 0.67512441 |
| cg01078772 | KIF3B     | 20 | 0.0008887  | 0.77617634 | 0.69458952 | 0.58641371 |
| cg17226602 | KIF4B     | 5  | 0.00564684 | 0.3606003  | 0.40039882 | 0.24610173 |
| cg16861598 | KIR2DL3;K | 19 | 0.00631167 | 0.49158642 | 0.5183163  | 0.36639523 |
| cg01819568 | KIT;KIT   | 4  | 0.00144775 | 0.75825298 | 0.74738377 | 0.61950873 |
| cg01308409 | KL        | 13 | 0.01237771 | 0.66116328 | 0.73870588 | 0.55114969 |
| cg06724409 | KLF6;KLF6 | 10 | 0.00065949 | 0.8620331  | 0.77282008 | 0.64322774 |
| cg21777553 | KLF7      | 2  | 0.00703053 | 0.28914501 | 0.35410969 | 0.18774345 |
| cg09606470 | KLHL6     | 3  | 0.01665552 | 0.5177352  | 0.58457993 | 0.35512506 |
| cg20659064 | KLK10     | 19 | 0.01237894 | 0.37007161 | 0.36895516 | 0.23452832 |
| cg08375658 | KLK12;KLI | 19 | 0.00953692 | 0.31985649 | 0.32820012 | 0.21900794 |
| cg07798605 | KLK9      | 19 | 0.01073914 | 0.57860584 | 0.55911594 | 0.44914644 |
| cg15368872 | KLRK1     | 12 | 0.03038061 | 0.46219349 | 0.49693453 | 0.35494947 |
| cg11150901 | KMO       | 1  | 0.00388546 | 0.40210383 | 0.51843317 | 0.24412988 |
| cg27277403 | KMO       | 1  | 0.00204611 | 0.27297835 | 0.29307855 | 0.1393513  |
| cg04880751 | KMO       | 1  | 0.0039229  | 0.68627691 | 0.65947342 | 0.42723885 |
| cg20378687 | KPNA4     | 3  | 0.02892693 | 0.54742742 | 0.62146372 | 0.4424896  |
| cg03348792 | KRT1      | 12 | 0.01481204 | 0.72456823 | 0.73109727 | 0.62258697 |
| cg11471401 | KRT6A     | 12 | 0.00638555 | 0.61370897 | 0.57671433 | 0.43469284 |
| cg11051139 | KRT80;KR  | 12 | 0.00173053 | 0.82089547 | 0.76890517 | 0.56201164 |
| cg07925587 | KRT80;KR  | 12 | 0.00183657 | 0.69124673 | 0.60723747 | 0.3590119  |
| cg23878404 | KRTAP1-5  | 17 | 0.00758031 | 0.59262762 | 0.58132709 | 0.44179463 |
| cg14588606 | KRTAP1-5  | 17 | 0.0012838  | 0.84284629 | 0.80838878 | 0.67135879 |
| cg17903229 | KRTAP10-  | 21 | 0.00117894 | 0.62058976 | 0.58633444 | 0.48358835 |
| cg00275828 | KRTAP2-4  | 17 | 0.00294138 | 0.77861591 | 0.77125345 | 0.6398423  |
| cg23058745 | KRTAP4-5  | 17 | 0.00252124 | 0.7778533  | 0.78817143 | 0.66661039 |
| cg23718736 | L3MBTL4   | 18 | 0.02530038 | 0.60126741 | 0.59860491 | 0.465121   |
| cg22545168 | LAIR1;LAI | 19 | 0.02027046 | 0.54717511 | 0.52431117 | 0.42407585 |
| cg21878746 | LAIR1;LAI | 19 | 0.02145574 | 0.53169691 | 0.58290014 | 0.42243193 |
| cg13031029 | LAMB1     | 7  | 0.04680546 | 0.63201759 | 0.75979881 | 0.45309023 |

|            |            |    |            |            |            |            |
|------------|------------|----|------------|------------|------------|------------|
| cg15600176 | LAMB1      | 7  | 0.00124243 | 0.86141936 | 0.82568032 | 0.72013196 |
| cg03041510 | LAMB1      | 7  | 0.00220808 | 0.66033598 | 0.66418317 | 0.4643557  |
| cg07168232 | LAMB3;L    | 1  | 0.0008696  | 0.59371349 | 0.45277016 | 0.25204515 |
| cg22809683 | LAMC1      | 1  | 0.00200529 | 0.85387152 | 0.79157173 | 0.68247929 |
| cg12689670 | LAMC1      | 1  | 0.00351539 | 0.77703253 | 0.78567762 | 0.51616104 |
| cg13766560 | LAMC3      | 9  | 0.01580869 | 0.74400879 | 0.74793851 | 0.62630273 |
| cg18030943 | LAMP3      | 3  | 0.00081498 | 0.64660066 | 0.59852479 | 0.46298634 |
| cg17418085 | LAPTM5     | 1  | 0.01183547 | 0.73507928 | 0.71044627 | 0.52878216 |
| cg04760493 | LARP1B;L   | 4  | 0.01633983 | 0.45492475 | 0.50146271 | 0.3205396  |
| cg03134947 | LAT;LAT;L  | 16 | 0.03209984 | 0.49718339 | 0.50455581 | 0.38887468 |
| cg18793512 | LBH        | 2  | 0.00134068 | 0.84597508 | 0.82100047 | 0.63152095 |
| cg10991454 | LCLAT1;L   | 2  | 0.00170786 | 0.79876008 | 0.7510454  | 0.5430074  |
| cg23469878 | LCN6       | 9  | 0.02087024 | 0.65373907 | 0.73672586 | 0.54582148 |
| cg23205648 | LCP1       | 13 | 0.00567752 | 0.4882437  | 0.56313324 | 0.38167867 |
| cg25827710 | LCP1       | 13 | 0.001223   | 0.26336038 | 0.28666139 | 0.12634204 |
| cg08670465 | LCP2       | 5  | 0.0048797  | 0.40735487 | 0.54194252 | 0.26001901 |
| cg09451413 | LCP2;LCP   | 5  | 0.02802634 | 0.62662668 | 0.60427158 | 0.49958093 |
| cg09672233 | LCP2;LCP   | 5  | 0.02115736 | 0.64807808 | 0.66617675 | 0.51969196 |
| cg08262002 | LDB2;LDB   | 4  | 0.00697437 | 0.54095721 | 0.55920373 | 0.42193868 |
| cg27450010 | LDB2;LDB   | 4  | 0.00447146 | 0.8234389  | 0.80569279 | 0.69162509 |
| cg11821245 | LDHC;LDF   | 11 | 0.01807343 | 0.42558703 | 0.49910672 | 0.27474025 |
| cg06180729 | LDLRAD3    | 11 | 0.00065949 | 0.90288059 | 0.86066427 | 0.74344289 |
| cg18140889 | LELP1      | 1  | 0.00068904 | 0.46179538 | 0.50951807 | 0.32507226 |
| cg15466952 | LEPR;LEP   | 1  | 0.00151239 | 0.59649268 | 0.54313884 | 0.34572886 |
| cg13439241 | LGALS12;L  | 11 | 0.00395839 | 0.32062618 | 0.34136591 | 0.14265439 |
| cg11183156 | LGALS12;L  | 11 | 0.00279455 | 0.33421951 | 0.32103035 | 0.16710636 |
| cg27376024 | LGALS12;L  | 11 | 0.00168532 | 0.2405602  | 0.24943433 | 0.11421902 |
| cg26651950 | LGALS2     | 22 | 0.0212437  | 0.60102979 | 0.53583239 | 0.40271602 |
| cg04927537 | LGALS3BF   | 17 | 0.00431388 | 0.69429775 | 0.69747531 | 0.57945598 |
| cg14870271 | LGALS3BF   | 17 | 0.00481061 | 0.64712361 | 0.64007889 | 0.49421641 |
| cg24387542 | LGALS9B    | 17 | 0.02089413 | 0.4067516  | 0.43203461 | 0.2930652  |
| cg13597417 | LGALS9C    | 17 | 0.01530568 | 0.41306754 | 0.44326639 | 0.28180735 |
| cg02300379 | LGI1       | 10 | 0.00262173 | 0.41884634 | 0.45408173 | 0.28286322 |
| cg04468092 | LGI2       | 4  | 0.00639169 | 0.87655314 | 0.88437048 | 0.76473211 |
| cg11683364 | LGR6;LGR   | 1  | 0.03497365 | 0.60844981 | 0.60104015 | 0.44308153 |
| cg26658897 | LHFPL2     | 5  | 0.00390072 | 0.78309096 | 0.74337524 | 0.60752432 |
| cg16326367 | LHFPL2     | 5  | 0.00072814 | 0.78985227 | 0.67428979 | 0.5068485  |
| cg14305801 | LHX2       | 9  | 0.04650849 | 0.64701738 | 0.67087966 | 0.47672518 |
| cg06626184 | LHX2       | 9  | 0.00425638 | 0.62278558 | 0.69799154 | 0.43740793 |
| cg16353006 | LHX9       | 1  | 0.00702537 | 0.44528096 | 0.41317134 | 0.25598366 |
| cg05128414 | LHX9       | 1  | 0.00279494 | 0.32289679 | 0.31576176 | 0.20969983 |
| cg08463788 | LHX9;LHX   | 1  | 0.01040141 | 0.60898948 | 0.56268731 | 0.45467255 |
| cg08610862 | LHX9;LHX   | 1  | 0.02313299 | 0.61684916 | 0.58636781 | 0.4834213  |
| cg05920909 | LHX9;LHX   | 1  | 0.00989476 | 0.61472751 | 0.58418085 | 0.43231563 |
| cg25384595 | LILRA1;LIL | 19 | 0.04825245 | 0.60497639 | 0.65746272 | 0.48581301 |
| cg19216475 | LILRA2;LIL | 19 | 0.00613201 | 0.32345945 | 0.35725179 | 0.19105866 |

|            |             |    |            |            |            |            |
|------------|-------------|----|------------|------------|------------|------------|
| cg26649140 | LILRB1      | 19 | 0.00077468 | 0.27153198 | 0.31825481 | 0.16233788 |
| cg05365532 | LILRB1      | 19 | 0.00082157 | 0.57585145 | 0.54028727 | 0.39718416 |
| cg03372852 | LILRP2      | 19 | 0.00947108 | 0.40289655 | 0.45055995 | 0.29400341 |
| cg25437886 | LIMD1       | 3  | 0.01390012 | 0.5991029  | 0.59178002 | 0.35742054 |
| cg05310309 | LIMS1       | 2  | 0.00857669 | 0.77097547 | 0.74458665 | 0.59001428 |
| cg03555157 | LIMS2;LIM   | 2  | 0.00516729 | 0.43239102 | 0.41004292 | 0.30495319 |
| cg04947052 | LIMS2;LIM   | 2  | 0.00168532 | 0.84615307 | 0.80615123 | 0.7011208  |
| cg01761729 | LIMS2;LIM   | 2  | 0.00065949 | 0.52468624 | 0.42220161 | 0.28398631 |
| cg17728974 | LIN28B      | 6  | 0.00655853 | 0.40692074 | 0.4389373  | 0.24730012 |
| cg19721087 | LIN28B      | 6  | 0.04280685 | 0.59470952 | 0.54588604 | 0.44437271 |
| cg08382737 | LIN7B       | 19 | 0.03824432 | 0.342687   | 0.32842583 | 0.22612202 |
| cg09797463 | LIPA;LIPA   | 10 | 0.01296171 | 0.78917078 | 0.7604425  | 0.63150776 |
| cg12581682 | LIPC        | 15 | 0.00065949 | 0.88650569 | 0.82239514 | 0.71425823 |
| cg08767044 | LITAF;LITAF | 16 | 0.00806542 | 0.75532725 | 0.76393542 | 0.54794108 |
| cg26083045 | LMCD1       | 3  | 0.02658897 | 0.54848449 | 0.52039    | 0.40217138 |
| cg05989795 | LMF1        | 16 | 0.04596111 | 0.63826345 | 0.62204506 | 0.50244775 |
| cg17453456 | LMNA;LMNA   | 1  | 0.00131641 | 0.23737618 | 0.22096722 | 0.11962453 |
| cg27182012 | LMNA;LMNA   | 1  | 0.00280066 | 0.85221762 | 0.85155892 | 0.7176782  |
| cg08586426 | LMO2        | 11 | 0.00213077 | 0.75594378 | 0.73506672 | 0.493089   |
| cg04757411 | LMO7        | 13 | 0.00123845 | 0.85158294 | 0.83181277 | 0.64465916 |
| cg26400954 | LMO7        | 13 | 0.00101151 | 0.71499636 | 0.62825743 | 0.47503879 |
| cg18833788 | LMTK3       | 19 | 0.01457962 | 0.5116214  | 0.51422978 | 0.40301876 |
| cg14325930 | LMX1B       | 9  | 0.01428062 | 0.67255826 | 0.73720435 | 0.52239461 |
| cg18560915 | LNX1        | 4  | 0.00146177 | 0.77338084 | 0.71894534 | 0.5584645  |
| cg23543318 | LOC100188   | 4  | 0.0101333  | 0.74944754 | 0.81699768 | 0.61671923 |
| cg23127323 | LOC100188   | 4  | 0.01083395 | 0.40459458 | 0.4317092  | 0.29041907 |
| cg18120259 | LOC100188   | 6  | 0.00736725 | 0.83961729 | 0.85621993 | 0.68568865 |
| cg20874785 | LOC100188   | 2  | 0.00958999 | 0.57774729 | 0.6187259  | 0.43139707 |
| cg00230120 | LOC100293   | 12 | 0.00129639 | 0.88313403 | 0.8532236  | 0.72422982 |
| cg24951335 | LOC100293   | 12 | 0.0261269  | 0.65107459 | 0.61748077 | 0.47748051 |
| cg18071202 | LOC100293   | 12 | 0.02665468 | 0.69939025 | 0.69288723 | 0.54518383 |
| cg14475966 | LOC14584    | 15 | 0.003299   | 0.77057612 | 0.76213611 | 0.60968902 |
| cg00213301 | LOC14584    | 15 | 0.0103127  | 0.64529228 | 0.62465269 | 0.4850171  |
| cg14891209 | LOC14584    | 15 | 0.00201346 | 0.27087938 | 0.28079441 | 0.1463277  |
| cg12309653 | LOC14584    | 15 | 0.00317466 | 0.48476276 | 0.4844662  | 0.29805612 |
| cg00216138 | LOC14584    | 15 | 0.00176484 | 0.54392107 | 0.56346692 | 0.26722653 |
| cg06451900 | LOC14584    | 15 | 0.00111281 | 0.75599327 | 0.6990499  | 0.47049889 |
| cg24956533 | LOC14584    | 15 | 0.00283173 | 0.84114693 | 0.79906348 | 0.61416629 |
| cg22444584 | LOC14584    | 15 | 0.00334886 | 0.6620054  | 0.62373208 | 0.43492644 |
| cg11965311 | LOC14584    | 15 | 0.00237687 | 0.86856851 | 0.80545802 | 0.62601812 |
| cg05429448 | LOC15222    | 3  | 0.00152273 | 0.8206719  | 0.80783922 | 0.51971705 |
| cg12963656 | LOC15222    | 3  | 0.00472204 | 0.80303031 | 0.79967425 | 0.54737384 |
| cg15046507 | LOC22112    | 11 | 0.0038151  | 0.23511329 | 0.23578829 | 0.1324463  |
| cg22093306 | LOC25459    | 15 | 0.01240534 | 0.42219966 | 0.46810191 | 0.27626114 |
| cg15129183 | LOC25739    | 5  | 0.0048909  | 0.7743971  | 0.78296554 | 0.52060559 |
| cg09802818 | LOC28340    | 12 | 0.00913085 | 0.6193411  | 0.64125333 | 0.46331686 |

|            |           |    |            |            |            |            |
|------------|-----------|----|------------|------------|------------|------------|
| cg00220661 | LOC28427  | 18 | 0.01015119 | 0.31644203 | 0.31993609 | 0.20051023 |
| cg01723706 | LOC28541  | 4  | 0.00548311 | 0.53238555 | 0.56619518 | 0.40935759 |
| cg26701510 | LOC28583  | 6  | 0.02524768 | 0.57373755 | 0.6591501  | 0.3854722  |
| cg12035144 | LOC28583  | 6  | 0.00675316 | 0.37327059 | 0.39784835 | 0.20570111 |
| cg01751584 | LOC28635  | 9  | 0.00206218 | 0.82594085 | 0.7815495  | 0.64072637 |
| cg21242356 | LOC40426  | 17 | 0.01817172 | 0.37953377 | 0.39910791 | 0.27949114 |
| cg17062109 | LOC40426  | 17 | 0.00833663 | 0.39300422 | 0.35246064 | 0.24493007 |
| cg22583148 | LOC40426  | 17 | 0.01622063 | 0.50032129 | 0.47998712 | 0.37021367 |
| cg15908709 | LOC40426  | 17 | 0.0024386  | 0.46452065 | 0.42531897 | 0.27048325 |
| cg17528189 | LOC44004  | 11 | 0.01317469 | 0.2894296  | 0.29172002 | 0.16696938 |
| cg01821850 | LOC44091  | 2  | 0.00297171 | 0.65075864 | 0.65665719 | 0.51665434 |
| cg05146756 | LOC55420  | 9  | 0.00964959 | 0.33868296 | 0.34493748 | 0.19259547 |
| cg01878406 | LOC64662  | 1  | 0.00624726 | 0.32833251 | 0.33086767 | 0.21923116 |
| cg23590187 | LOC64676  | 7  | 0.00840556 | 0.40727132 | 0.37488788 | 0.23625272 |
| cg13346869 | LOC72802  | 8  | 0.03358008 | 0.40736589 | 0.40394409 | 0.28034231 |
| cg20414364 | LOC72861  | 5  | 0.0122155  | 0.64404602 | 0.69065125 | 0.45069535 |
| cg09048205 | LOC72861  | 5  | 0.01447617 | 0.76499283 | 0.76605627 | 0.59107179 |
| cg02927821 | LOC73075  | 17 | 0.03384214 | 0.52339618 | 0.49909706 | 0.3949096  |
| cg05825085 | LOC73227  | 16 | 0.036396   | 0.76987379 | 0.77653109 | 0.66318503 |
| cg15111469 | LOX       | 5  | 0.01710021 | 0.70696855 | 0.66475461 | 0.55877788 |
| cg23345292 | LOXHD1;L  | 18 | 0.00174903 | 0.58021633 | 0.56918003 | 0.46596055 |
| cg19877248 | LOXL2     | 8  | 0.02025944 | 0.76639438 | 0.74015128 | 0.62605653 |
| cg14429427 | LPAR1;LP  | 9  | 0.04388834 | 0.38595107 | 0.38185728 | 0.27759966 |
| cg12646794 | LPHN3     | 4  | 0.00723854 | 0.41981983 | 0.49512471 | 0.29704754 |
| cg16225703 | LPHN3     | 4  | 0.00506149 | 0.76026029 | 0.77835868 | 0.64110018 |
| cg12297546 | LPP;LPP   | 3  | 0.00081925 | 0.86338713 | 0.84256767 | 0.72740766 |
| cg04773529 | LPP;LPP;L | 3  | 0.00405622 | 0.35388469 | 0.41315854 | 0.19710087 |
| cg00902153 | LPP;LPP;L | 3  | 0.00186404 | 0.48188115 | 0.36895243 | 0.23459298 |
| cg04103706 | LPP;LPP;L | 3  | 0.01574127 | 0.91625979 | 0.90900511 | 0.77071638 |
| cg02011953 | LPPR1     | 9  | 0.00614688 | 0.47680808 | 0.55628007 | 0.37222308 |
| cg02044895 | LPXN;LPX  | 11 | 0.01061523 | 0.33879515 | 0.27052786 | 0.16341601 |
| cg20294319 | LRCH1;LR  | 13 | 0.01502763 | 0.49350061 | 0.46727277 | 0.31938621 |
| cg18005280 | LRIG1     | 3  | 0.00503285 | 0.72638403 | 0.67911734 | 0.55881456 |
| cg24112628 | LRP11     | 6  | 0.01698967 | 0.83313214 | 0.84123476 | 0.72082091 |
| cg03252605 | LRP1B     | 2  | 0.0059385  | 0.39425609 | 0.41013412 | 0.27848876 |
| cg16671674 | LRP1B     | 2  | 0.00183351 | 0.65206237 | 0.6598797  | 0.52446719 |
| cg15664504 | LRP1B     | 2  | 0.03564926 | 0.65412788 | 0.67311811 | 0.48594697 |
| cg03678566 | LRP5      | 11 | 0.00112679 | 0.82840045 | 0.77433508 | 0.62908984 |
| cg26838900 | LRRC15;LR | 3  | 0.00362629 | 0.80373417 | 0.79633378 | 0.69296402 |
| cg09670263 | LRRC2;LR  | 3  | 0.00065949 | 0.88290375 | 0.7593238  | 0.61664449 |
| cg05076755 | LRRC32;LR | 11 | 0.00457701 | 0.70694331 | 0.68539676 | 0.43577574 |
| cg27022853 | LRRC33    | 3  | 0.04063967 | 0.66203899 | 0.6658002  | 0.55659906 |
| cg15819128 | LRRFIP1;L | 2  | 0.00763406 | 0.48496125 | 0.43000142 | 0.23445428 |
| cg12283393 | LSP1      | 11 | 0.01581441 | 0.73370475 | 0.75134526 | 0.62697632 |
| cg09761080 | LST1;LST1 | 6  | 0.01688348 | 0.53591913 | 0.5653522  | 0.43338542 |
| cg16056219 | LTBP2     | 14 | 0.00168532 | 0.50775679 | 0.35677128 | 0.24963129 |

|            |          |    |            |            |            |            |
|------------|----------|----|------------|------------|------------|------------|
| cg26011692 | LTBP2    | 14 | 0.0122204  | 0.91382412 | 0.91644961 | 0.76744236 |
| cg14986500 | LTBP2    | 14 | 0.00846831 | 0.70649055 | 0.71296075 | 0.57247538 |
| cg14340889 | LTBP2    | 14 | 0.00077454 | 0.63907877 | 0.5561509  | 0.43062689 |
| cg03491087 | LTBP2    | 14 | 0.0012838  | 0.69132115 | 0.6177145  | 0.44104513 |
| cg18865207 | LY9;LY9  | 1  | 0.00239883 | 0.58927868 | 0.61775087 | 0.42805594 |
| cg10316357 | LY9;LY9  | 1  | 0.0042005  | 0.2607422  | 0.26774439 | 0.14982943 |
| cg13213009 | LY96     | 8  | 0.01687692 | 0.63218903 | 0.61887418 | 0.4488194  |
| cg23732024 | LY96     | 8  | 0.00666111 | 0.87969117 | 0.86358376 | 0.73768627 |
| cg08806632 | LYL1     | 19 | 0.02445578 | 0.56595961 | 0.60284587 | 0.41571932 |
| cg05095252 | LYPD6    | 2  | 0.04358513 | 0.6642786  | 0.67570494 | 0.52890635 |
| cg22367631 | MACF1    | 1  | 0.00385922 | 0.56825384 | 0.55103462 | 0.31053864 |
| cg26864766 | MACF1;M  | 1  | 0.00506968 | 0.70391133 | 0.65957234 | 0.51189616 |
| cg00502509 | MAD1L1;l | 7  | 0.00065949 | 0.9144899  | 0.86905492 | 0.74340661 |
| cg21728101 | MAD1L1;l | 7  | 0.00705117 | 0.66894838 | 0.71752465 | 0.49584251 |
| cg10030633 | MAD1L1;l | 7  | 0.03599253 | 0.85446029 | 0.77102122 | 0.65836785 |
| cg27109748 | MAD1L1;l | 7  | 0.00065949 | 0.82342601 | 0.74966462 | 0.60784069 |
| cg00575665 | MAFB;MA  | 20 | 0.00349176 | 0.5255617  | 0.42047375 | 0.29484407 |
| cg01403010 | MAFF;MA  | 22 | 0.04610222 | 0.73476953 | 0.75210859 | 0.57996527 |
| cg05593887 | MAGI2    | 7  | 0.04832512 | 0.7123082  | 0.69045598 | 0.44626022 |
| cg14649449 | MAMDC2   | 9  | 0.00073265 | 0.67817247 | 0.57801778 | 0.37595974 |
| cg04677410 | MAML2    | 11 | 0.04870447 | 0.83064122 | 0.80150189 | 0.6919768  |
| cg15521790 | MAML2    | 11 | 0.00239822 | 0.47796427 | 0.37462924 | 0.2422067  |
| cg01093786 | MAML2    | 11 | 0.00392454 | 0.29205989 | 0.24708013 | 0.13330103 |
| cg23206160 | MAML3    | 4  | 0.00219764 | 0.39332712 | 0.36293514 | 0.18555697 |
| cg03597159 | MAML3    | 4  | 0.00075518 | 0.71249549 | 0.61612308 | 0.45880213 |
| cg08880153 | MAP1A    | 15 | 0.00092595 | 0.80300756 | 0.72917053 | 0.59949221 |
| cg15076869 | MAP2K2   | 19 | 0.014833   | 0.54462309 | 0.52956973 | 0.38948185 |
| cg14573876 | MAP2K2   | 19 | 0.00408071 | 0.65261586 | 0.60325819 | 0.36932551 |
| cg00146864 | MAP3K14  | 17 | 0.00768024 | 0.6084765  | 0.5811205  | 0.44773075 |
| cg19982668 | MAP3K3;l | 17 | 0.00615082 | 0.76866605 | 0.79363329 | 0.61230987 |
| cg07474842 | MAP3K5   | 6  | 0.00387438 | 0.83219982 | 0.82405598 | 0.59620024 |
| cg21778987 | MAP3K5   | 6  | 0.00218837 | 0.61189556 | 0.62880821 | 0.3163445  |
| cg09331409 | MAP6;MA  | 11 | 0.00597821 | 0.29075379 | 0.25425229 | 0.14300659 |
| cg26946769 | MAPK4    | 18 | 0.02252087 | 0.62416148 | 0.63744721 | 0.50161566 |
| cg14321936 | MAPKAPK  | 3  | 0.00665442 | 0.7231191  | 0.66776873 | 0.5660381  |
| cg16805068 | MAPRE1   | 20 | 0.00127437 | 0.83847416 | 0.79859288 | 0.67539301 |
| cg07017164 | MAPT;MA  | 17 | 0.03110358 | 0.79241005 | 0.78522026 | 0.67394331 |
| cg15498306 | MARCH1;  | 4  | 0.00674191 | 0.60041005 | 0.59259089 | 0.40584326 |
| cg14026106 | MARCH8;  | 10 | 0.00932052 | 0.676441   | 0.63434949 | 0.5301955  |
| cg11009736 | MARCO    | 2  | 0.04889422 | 0.63125155 | 0.64560776 | 0.52401692 |
| cg02224164 | MARS     | 12 | 0.00128812 | 0.67358934 | 0.54919416 | 0.42804705 |
| cg13305823 | MAS1L    | 6  | 0.00535942 | 0.45880528 | 0.53398629 | 0.33640629 |
| cg25818109 | MASP1    | 3  | 0.00206218 | 0.58697094 | 0.53220655 | 0.3851442  |
| cg25391820 | MATR3;SI | 5  | 0.03931081 | 0.39061763 | 0.40101125 | 0.28439984 |
| cg08535978 | MBNL1;N  | 3  | 0.01317683 | 0.42670113 | 0.42295811 | 0.29103709 |
| cg24446429 | MBP;MBF  | 18 | 0.00176816 | 0.79448176 | 0.74024068 | 0.53340654 |



|            |          |    |            |            |            |            |
|------------|----------|----|------------|------------|------------|------------|
| cg16762684 | MBP;MBF  | 18 | 0.00749864 | 0.38169145 | 0.35457993 | 0.21062895 |
| cg27262850 | MBP;MBF  | 18 | 0.03686125 | 0.72663094 | 0.72827544 | 0.60079499 |
| cg24853975 | MCC      | 5  | 0.00521564 | 0.65197445 | 0.62041792 | 0.47323548 |
| cg06062378 | MCC;MCC  | 5  | 0.00111524 | 0.77353528 | 0.72503245 | 0.46546844 |
| cg08213909 | MCC;MCC  | 5  | 0.00065949 | 0.84341221 | 0.74674764 | 0.57299861 |
| cg11521563 | MCF2L;M  | 13 | 0.01009622 | 0.64154842 | 0.61437102 | 0.50051307 |
| cg12560772 | MCHR2;N  | 6  | 0.00539114 | 0.56542882 | 0.61426915 | 0.45177371 |
| cg06778183 | MCTP1;M  | 5  | 0.00751061 | 0.68070109 | 0.7013914  | 0.46529012 |
| cg01278975 | MDGA1    | 6  | 0.00179217 | 0.8270529  | 0.88995951 | 0.49604896 |
| cg19503462 | MDGA2    | 14 | 0.01095648 | 0.34041436 | 0.33271263 | 0.1797042  |
| cg25956089 | MECOM;I  | 3  | 0.0355165  | 0.47882432 | 0.47880802 | 0.31739439 |
| cg10371155 | MED1     | 17 | 0.00405622 | 0.79732773 | 0.79736461 | 0.62238452 |
| cg05689413 | MED20    | 6  | 0.00925322 | 0.43983489 | 0.39770646 | 0.26329936 |
| cg03301498 | MED29    | 19 | 0.00140256 | 0.77986787 | 0.72777111 | 0.52163003 |
| cg05554494 | MEFV     | 16 | 0.01248948 | 0.73692586 | 0.7707355  | 0.60001806 |
| cg03919650 | MEFV     | 16 | 0.00145334 | 0.40069137 | 0.39532365 | 0.20546887 |
| cg26846864 | MEFV     | 16 | 0.00073118 | 0.67470952 | 0.60717293 | 0.44447225 |
| cg09187007 | MEGF6    | 1  | 0.00209505 | 0.33759556 | 0.35407959 | 0.22340482 |
| cg09425926 | MEST     | 7  | 0.02001663 | 0.68775984 | 0.68589399 | 0.56732676 |
| cg24197567 | MET;MET  | 7  | 0.00073265 | 0.57168016 | 0.52408161 | 0.35849286 |
| cg11056055 | MET;MET  | 7  | 0.00075494 | 0.7741613  | 0.71235172 | 0.59267914 |
| cg23992886 | MET;MET  | 7  | 0.01946986 | 0.81945418 | 0.809594   | 0.70093143 |
| cg15224459 | METRNL   | 17 | 0.00317348 | 0.61521241 | 0.61999438 | 0.35101289 |
| cg02633149 | METRNL   | 17 | 0.00154265 | 0.78801029 | 0.72461389 | 0.57325676 |
| cg12666827 | METRNL   | 17 | 0.02846049 | 0.76288924 | 0.72615767 | 0.58796521 |
| cg09808606 | METTL9;N | 16 | 0.04470828 | 0.67853696 | 0.71438659 | 0.53945014 |
| cg07917978 | METTL9;N | 16 | 0.0045798  | 0.40570831 | 0.40307296 | 0.26771955 |
| cg12695612 | MFAP2;M  | 1  | 0.00065949 | 0.88510259 | 0.79012787 | 0.61914402 |
| cg17744878 | MFAP2;M  | 1  | 0.00206867 | 0.71653349 | 0.65219488 | 0.46775342 |
| cg19306948 | MFAP2;M  | 1  | 0.00206218 | 0.72506015 | 0.67906802 | 0.55827706 |
| cg10201923 | MFAP2;M  | 1  | 0.00201167 | 0.93495918 | 0.92833974 | 0.82407831 |
| cg08477744 | MFAP2;M  | 1  | 0.00074801 | 0.89669452 | 0.82300604 | 0.71633111 |
| cg07086226 | MFSD7    | 4  | 0.00068904 | 0.63294558 | 0.43828614 | 0.30533557 |
| cg01149192 | MGAT1;N  | 5  | 0.03609869 | 0.70152255 | 0.69295598 | 0.55662569 |
| cg04212021 | MGAT1;N  | 5  | 0.01321271 | 0.78951096 | 0.80558321 | 0.62589701 |
| cg26050975 | MGAT4B;  | 5  | 0.01729033 | 0.6990971  | 0.63715187 | 0.47091451 |
| cg05514299 | MGAT5B;  | 17 | 0.00539114 | 0.44829312 | 0.47036989 | 0.26160066 |
| cg21868063 | MGAT5B;  | 17 | 0.00344865 | 0.53038133 | 0.55881222 | 0.37902238 |
| cg06975633 | MGC2738  | 1  | 0.00503375 | 0.56040577 | 0.53715382 | 0.41863874 |
| cg03148889 | MGC2738  | 1  | 0.00670817 | 0.45438154 | 0.46474012 | 0.31606617 |
| cg10435609 | MGC2738  | 1  | 0.00073547 | 0.85775074 | 0.77408014 | 0.62871202 |
| cg24113496 | MGC295C  | 5  | 0.01396719 | 0.50395915 | 0.50475929 | 0.35582482 |
| cg23370946 | MGC458C  | 4  | 0.019985   | 0.61517752 | 0.67838396 | 0.50687444 |
| cg16027775 | MGLL;MC  | 3  | 0.00077468 | 0.64587779 | 0.53376646 | 0.29024118 |
| cg22575127 | MGMT     | 10 | 0.00081925 | 0.89947349 | 0.84894437 | 0.72419445 |
| cg03821121 | MICAL2   | 11 | 0.00766486 | 0.72216153 | 0.65195628 | 0.46145422 |

|            |          |    |            |            |            |            |
|------------|----------|----|------------|------------|------------|------------|
| cg03078520 | MICAL3;N | 22 | 0.02122541 | 0.72854755 | 0.75394144 | 0.60556538 |
| cg00044354 | MIER1;W  | 1  | 0.008246   | 0.3977376  | 0.37550232 | 0.26683243 |
| cg24199384 | MIPEP    | 13 | 0.00232326 | 0.72716043 | 0.6346251  | 0.51040214 |
| cg26614229 | MIR1182; | 1  | 0.00380612 | 0.30149272 | 0.30059379 | 0.17532655 |
| cg22492271 | MIR1200; | 7  | 0.00118039 | 0.78938901 | 0.74669409 | 0.58579891 |
| cg05076730 | MIR1207; | 8  | 0.01997904 | 0.8100912  | 0.83496492 | 0.70125299 |
| cg00444740 | MIR1208  | 8  | 0.01530568 | 0.8402745  | 0.86275628 | 0.72798779 |
| cg07018107 | MIR1208  | 8  | 0.00174783 | 0.87227184 | 0.82636605 | 0.64540606 |
| cg27292264 | MIR1280; | 3  | 0.00141699 | 0.34052974 | 0.34810755 | 0.23345794 |
| cg00477302 | MIR182   | 7  | 0.00532167 | 0.36152493 | 0.35755778 | 0.22589082 |
| cg23955417 | MIR1976; | 1  | 0.00936413 | 0.45064434 | 0.4852691  | 0.33961533 |
| cg02515217 | MIR21    | 17 | 0.0012504  | 0.78925828 | 0.69991917 | 0.54570447 |
| cg15759721 | MIR21    | 17 | 0.00595714 | 0.70963496 | 0.67801889 | 0.4678874  |
| cg03184776 | MIR2117  | 17 | 0.00104452 | 0.49040521 | 0.43297842 | 0.26761067 |
| cg25687874 | MIR2117  | 17 | 0.00065949 | 0.58777195 | 0.51698579 | 0.36332966 |
| cg16506910 | MIR30A   | 6  | 0.00186249 | 0.73673274 | 0.73804003 | 0.60040986 |
| cg10583119 | MIR518D  | 19 | 0.00317234 | 0.35285926 | 0.33890038 | 0.23195486 |
| cg17670263 | MIR520C  | 19 | 0.00371278 | 0.36695103 | 0.35502356 | 0.23561222 |
| cg26664528 | MIR548H  | 15 | 0.00073118 | 0.81537129 | 0.7008088  | 0.54610629 |
| cg20587874 | MIR548N  | 2  | 0.00127427 | 0.53034081 | 0.49244019 | 0.27997929 |
| cg01706263 | MIR598;X | 8  | 0.00159552 | 0.40289897 | 0.47034003 | 0.25696748 |
| cg18496212 | MITF     | 3  | 0.01874852 | 0.82219284 | 0.8450142  | 0.72102375 |
| cg04811592 | MITF;MIT | 3  | 0.00081046 | 0.62542091 | 0.55321762 | 0.4445108  |
| cg15571405 | MKLN1    | 7  | 0.00095411 | 0.20829835 | 0.21085987 | 0.10028416 |
| cg03677952 | MLC1;ML  | 22 | 0.01546058 | 0.56430509 | 0.58229296 | 0.41174943 |
| cg08660915 | MLC1;ML  | 22 | 0.00716301 | 0.40970245 | 0.44907779 | 0.29450127 |
| cg14271023 | MLPH;ML  | 2  | 0.00276855 | 0.87876709 | 0.91001272 | 0.72605008 |
| cg22729539 | MLXIP    | 12 | 0.03811638 | 0.81726051 | 0.84514268 | 0.68458652 |
| cg17865265 | MMP19    | 12 | 0.00363129 | 0.67269231 | 0.69445368 | 0.50456171 |
| cg03509949 | MMP19    | 12 | 0.00997311 | 0.39278747 | 0.37195401 | 0.25454613 |
| cg07436701 | MMRN2;S  | 10 | 0.00315764 | 0.79136181 | 0.79837719 | 0.65507033 |
| cg05304729 | MNDA     | 1  | 0.00857669 | 0.57367505 | 0.5888867  | 0.46388639 |
| cg21876918 | MOBKL2A  | 19 | 0.02002988 | 0.72172398 | 0.74816772 | 0.57806694 |
| cg24938761 | MOBKL2A  | 19 | 0.00223182 | 0.75818393 | 0.69708576 | 0.50654441 |
| cg13648550 | MOBKL2E  | 9  | 0.01608519 | 0.68327779 | 0.70511695 | 0.55931215 |
| cg14643264 | MOBKL2E  | 9  | 0.01506509 | 0.73695036 | 0.70297976 | 0.55634382 |
| cg11621113 | MORG1;N  | 19 | 0.00430406 | 0.33746953 | 0.34791775 | 0.22689592 |
| cg00032879 | MORN1    | 1  | 0.00953692 | 0.75160624 | 0.76774998 | 0.59768422 |
| cg23110109 | MORN3    | 12 | 0.01645625 | 0.29978916 | 0.29241505 | 0.18630373 |
| cg01422009 | MPG      | 16 | 0.00126879 | 0.56919077 | 0.44150036 | 0.33412269 |
| cg18936620 | MPL      | 1  | 0.00163336 | 0.68309639 | 0.65409071 | 0.43846718 |
| cg04988978 | MPO      | 17 | 0.00359274 | 0.34918433 | 0.39202584 | 0.23702016 |
| cg17327331 | MPP5     | 14 | 0.00074016 | 0.60765291 | 0.48964625 | 0.34686604 |
| cg14599440 | MPPE1    | 18 | 0.01390004 | 0.53065588 | 0.53239265 | 0.37173355 |
| cg08591668 | MRE11A;I | 11 | 0.01488914 | 0.52833133 | 0.5314166  | 0.36676408 |
| cg13062935 | MRGPRX2  | 11 | 0.02568798 | 0.57427782 | 0.64742143 | 0.4708839  |

|              |          |    |            |            |            |            |
|--------------|----------|----|------------|------------|------------|------------|
| cg26371345   | MRPL14   | 6  | 0.00501826 | 0.43438718 | 0.49681059 | 0.32310021 |
| cg01445659   | MRPL34;M | 19 | 0.03905874 | 0.44728012 | 0.44857694 | 0.34457347 |
| cg23924737   | MRPS23   | 17 | 0.00802646 | 0.693967   | 0.66692794 | 0.51790254 |
| cg00673646   | MS4A6A;M | 11 | 0.01009622 | 0.48602193 | 0.53694864 | 0.31417672 |
| cg16773768   | MSRA;MS  | 8  | 0.00066204 | 0.78875608 | 0.68821202 | 0.5245629  |
| cg00791074   | MTHFD1L  | 6  | 0.00073378 | 0.71476896 | 0.59499009 | 0.32974505 |
| cg20694147   | MTHFD2;M | 2  | 0.00077013 | 0.35368454 | 0.27544413 | 0.13173265 |
| cg05959989   | MTL5;MT  | 11 | 0.02817065 | 0.65224972 | 0.6553287  | 0.53001267 |
| cg10995381   | MTRR;MT  | 5  | 0.00119228 | 0.85115412 | 0.82826693 | 0.70556689 |
| cg05656374   | MX2      | 21 | 0.00548311 | 0.61935841 | 0.68111131 | 0.43941431 |
| cg25368647   | MXD3;M   | 5  | 0.00171661 | 0.86602411 | 0.8170258  | 0.61639455 |
| cg14606858   | MYH16    | 7  | 0.01233628 | 0.50206983 | 0.51414338 | 0.34058387 |
| cg02558132   | MYLK;MY  | 3  | 0.00628685 | 0.79519737 | 0.77749024 | 0.67351258 |
| cg19611163   | MYLK;MY  | 3  | 0.00168532 | 0.78744044 | 0.75446761 | 0.61742917 |
| cg12235788   | MYLK;MY  | 3  | 0.01915914 | 0.73428666 | 0.73567092 | 0.58274311 |
| cg16402006   | MYLK4    | 6  | 0.02336655 | 0.86052575 | 0.84985909 | 0.7338176  |
| cg15453396   | MYLK4    | 6  | 0.00134295 | 0.79857057 | 0.80807325 | 0.61466471 |
| ch.5.432310f | MYO10    | 5  | 0.00806395 | 0.21701477 | 0.21403821 | 0.11295214 |
| cg06742628   | MYO10    | 5  | 0.00160732 | 0.62302742 | 0.57046052 | 0.45763479 |
| cg20748397   | MYO15A   | 17 | 0.00097487 | 0.83687495 | 0.79899724 | 0.69430932 |
| cg02920604   | MYO1E    | 15 | 0.00077183 | 0.3249656  | 0.25553475 | 0.14209273 |
| cg24128316   | MYOM1;M  | 18 | 0.01098413 | 0.3712795  | 0.43977423 | 0.26554769 |
| cg20103825   | MYOM2    | 8  | 0.00123203 | 0.29289438 | 0.28114015 | 0.14384489 |
| cg10215032   | MYT1L    | 2  | 0.00747631 | 0.3483833  | 0.34092682 | 0.23837056 |
| cg09716613   | N4BP2L1; | 13 | 0.01231302 | 0.57879246 | 0.60442073 | 0.38545456 |
| cg18700744   | NAA25    | 12 | 0.00071044 | 0.72419605 | 0.57598804 | 0.43085123 |
| cg25024321   | NALCN    | 13 | 0.0190357  | 0.75307059 | 0.7758376  | 0.65214422 |
| cg06934394   | NALCN    | 13 | 0.00212575 | 0.5197309  | 0.39278482 | 0.28655484 |
| cg11147919   | NALCN    | 13 | 0.03346286 | 0.55870353 | 0.57565544 | 0.45652116 |
| cg24324984   | NANOS2   | 19 | 0.00753326 | 0.52855368 | 0.52085898 | 0.41540764 |
| cg26609120   | NAPSB    | 19 | 0.00197576 | 0.54015152 | 0.56583161 | 0.42438516 |
| cg15474337   | NAPSB    | 19 | 0.013012   | 0.72372655 | 0.73799655 | 0.592552   |
| cg19323289   | NAV2     | 11 | 0.00337598 | 0.74197632 | 0.74794587 | 0.60881631 |
| cg02849401   | NAV2     | 11 | 0.00126059 | 0.88664269 | 0.82414231 | 0.64964171 |
| cg14534803   | NAV2     | 11 | 0.000682   | 0.80298305 | 0.67109159 | 0.54941147 |
| cg19141316   | NAV2;NA' | 11 | 0.00201017 | 0.9181361  | 0.89682212 | 0.77859866 |
| cg02959112   | NBL1;NBL | 1  | 0.00099274 | 0.82131804 | 0.72449975 | 0.61189565 |
| cg10024909   | NBLA003C | 4  | 0.00635299 | 0.57063924 | 0.66294291 | 0.43295744 |
| cg15234400   | NBLA003C | 4  | 0.00840303 | 0.73513679 | 0.79325144 | 0.56167988 |
| cg26805882   | NBLA003C | 4  | 0.00787909 | 0.8152664  | 0.85562163 | 0.69456473 |
| cg21383280   | NBLA003C | 4  | 0.00679356 | 0.49156235 | 0.53781492 | 0.31227738 |
| cg21727486   | NCAM1;N  | 11 | 0.02411591 | 0.53594642 | 0.59843789 | 0.43065621 |
| cg03147185   | NCAPH    | 2  | 0.00146869 | 0.57911773 | 0.5636349  | 0.41851156 |
| cg02532700   | NCF4;NCF | 22 | 0.02956308 | 0.63308433 | 0.68121195 | 0.52288113 |
| cg14416623   | NCKAP5;M | 2  | 0.01373528 | 0.5364141  | 0.50659593 | 0.31623103 |
| cg16328548   | NCKAP5;M | 2  | 0.02417619 | 0.70233341 | 0.71090671 | 0.59890378 |

|            |           |    |            |            |            |            |
|------------|-----------|----|------------|------------|------------|------------|
| cg04804139 | NCOR2;N   | 12 | 0.00079224 | 0.89264059 | 0.74464026 | 0.60730096 |
| cg23484380 | NCR3;NCF  | 6  | 0.00429038 | 0.34949987 | 0.37111829 | 0.23603996 |
| cg08610982 | NCR3;NCF  | 6  | 0.00369078 | 0.44667595 | 0.44567127 | 0.24367091 |
| cg13910377 | NCRNA00   | 21 | 0.00944446 | 0.64625546 | 0.64176115 | 0.53807751 |
| cg04436964 | NDUFS2;A  | 1  | 0.00092849 | 0.65029329 | 0.58335052 | 0.46692639 |
| cg08850169 | NDUFS2;N  | 1  | 0.02658729 | 0.40222908 | 0.39087641 | 0.28810901 |
| cg08580187 | NECAB2    | 16 | 0.00667685 | 0.66716896 | 0.67772295 | 0.4134033  |
| cg13822256 | NEFL      | 8  | 0.00494816 | 0.57871718 | 0.59786294 | 0.41002813 |
| cg13008174 | NEIL2;NEI | 8  | 0.00803433 | 0.51421563 | 0.50048425 | 0.33898183 |
| cg17280514 | NEU4;NEI  | 2  | 0.00093851 | 0.67271671 | 0.58953471 | 0.4636089  |
| cg00351443 | NEURL     | 10 | 0.03615697 | 0.72981485 | 0.73616517 | 0.61190606 |
| cg18636003 | NEURL     | 10 | 0.04194736 | 0.63404786 | 0.68278609 | 0.50325047 |
| cg20806345 | NEUROD1   | 2  | 0.00319532 | 0.29965828 | 0.36047324 | 0.1791862  |
| cg05109049 | NF1;EVI2I | 17 | 0.00694471 | 0.77084202 | 0.74172284 | 0.57107976 |
| cg10186605 | NF1;NF1   | 17 | 0.00160273 | 0.76528114 | 0.69138046 | 0.59097422 |
| cg08915824 | NFASC;NF  | 1  | 0.00755255 | 0.62936011 | 0.65023681 | 0.46601087 |
| cg21964564 | NFASC;NF  | 1  | 0.00504019 | 0.35798276 | 0.33335202 | 0.19249642 |
| cg27050612 | NFE2L1    | 17 | 0.01880817 | 0.38462328 | 0.39389102 | 0.27766316 |
| cg12510708 | NFE2L3    | 7  | 0.00552473 | 0.65108253 | 0.64074395 | 0.44861888 |
| cg16303048 | NID2      | 14 | 0.00572805 | 0.46547231 | 0.36325428 | 0.22950269 |
| cg11087503 | NID2      | 14 | 0.00122358 | 0.78871014 | 0.72662559 | 0.60893573 |
| cg24575128 | NISCH     | 3  | 0.00539186 | 0.53659218 | 0.47656118 | 0.33095925 |
| cg12300018 | NKAIN3    | 8  | 0.00262173 | 0.65408663 | 0.65898414 | 0.54609251 |
| cg06874016 | NKIRAS2;I | 17 | 0.00262173 | 0.27016983 | 0.29650156 | 0.15663052 |
| cg11330740 | NKX2-5;N  | 5  | 0.03251446 | 0.52010523 | 0.55432546 | 0.36330951 |
| cg18017926 | NKX2-5;N  | 5  | 0.01137235 | 0.39286715 | 0.40986608 | 0.28404988 |
| cg07383092 | NKX2-5;N  | 5  | 0.01038907 | 0.43533684 | 0.44563624 | 0.28670253 |
| cg01040654 | NKX2-5;N  | 5  | 0.03547817 | 0.65440181 | 0.66973136 | 0.51415717 |
| cg06374325 | NKX6-1    | 4  | 0.00520163 | 0.5508383  | 0.53496009 | 0.38333688 |
| cg24845848 | NKX6-1    | 4  | 0.01342353 | 0.30850714 | 0.32601431 | 0.18328887 |
| cg18297736 | NKX6-1    | 4  | 0.00174783 | 0.37547959 | 0.39529683 | 0.16133006 |
| cg22256677 | NKX6-1    | 4  | 0.00083214 | 0.30920692 | 0.39458941 | 0.15860159 |
| cg25830182 | NKX6-1    | 4  | 0.0010638  | 0.29221345 | 0.32114001 | 0.14879777 |
| cg02489958 | NKX6-1    | 4  | 0.00176816 | 0.42195326 | 0.45765637 | 0.19540419 |
| cg27406678 | NKX6-1    | 4  | 0.00496156 | 0.38263829 | 0.40937685 | 0.19002688 |
| cg22598426 | NKX6-1    | 4  | 0.00112617 | 0.33490635 | 0.39945035 | 0.18738166 |
| cg15704699 | NLK       | 17 | 0.00089487 | 0.303211   | 0.3286446  | 0.14623414 |
| cg22171142 | NLRC3     | 16 | 0.03249565 | 0.60579637 | 0.62956405 | 0.50272581 |
| cg24307499 | NLRP2     | 19 | 0.00999778 | 0.70497108 | 0.74214067 | 0.60388658 |
| cg13101705 | NMNAT2;   | 1  | 0.00197986 | 0.49280083 | 0.49414371 | 0.33888761 |
| cg07429087 | NMUR2     | 5  | 0.01528948 | 0.63471052 | 0.65832788 | 0.53226109 |
| cg19071544 | NOD1      | 7  | 0.03352901 | 0.75802731 | 0.77327463 | 0.63158175 |
| cg01243823 | NOD2      | 16 | 0.03358212 | 0.39210091 | 0.4011104  | 0.26317148 |
| cg03250947 | NOTCH4    | 6  | 0.00440148 | 0.67280381 | 0.63892295 | 0.50747326 |
| cg22008551 | NOVA2     | 19 | 0.01581441 | 0.59551388 | 0.57426636 | 0.47238978 |
| cg05797854 | NOX3      | 6  | 0.00513872 | 0.64376339 | 0.65237945 | 0.4464034  |

|            |          |    |            |            |            |            |
|------------|----------|----|------------|------------|------------|------------|
| cg06979108 | NOX4     | 11 | 0.01734283 | 0.59706997 | 0.58118842 | 0.46830866 |
| cg21609584 | NPAS2    | 2  | 0.00488665 | 0.76690443 | 0.69835951 | 0.59036712 |
| cg06850660 | NPFF     | 12 | 0.0019386  | 0.37865051 | 0.34561927 | 0.21075544 |
| cg26647771 | NPR3     | 5  | 0.00065949 | 0.68991509 | 0.56392416 | 0.41924889 |
| cg01335126 | NPW      | 16 | 0.00456803 | 0.46282084 | 0.45703138 | 0.3310791  |
| cg09636661 | NQO1;NC  | 16 | 0.00563553 | 0.32516558 | 0.29485485 | 0.17581161 |
| cg09244872 | NR1H4    | 12 | 0.00200023 | 0.55943775 | 0.56614255 | 0.45446194 |
| cg08969950 | NR2F1    | 5  | 0.01887078 | 0.59916595 | 0.61646231 | 0.40887407 |
| cg26593946 | NR2F2    | 15 | 0.0048909  | 0.28724871 | 0.32155607 | 0.14409494 |
| cg05108467 | NR2F2    | 15 | 0.00207334 | 0.20344191 | 0.21233432 | 0.09093829 |
| cg01213447 | NR2F2    | 15 | 0.0017637  | 0.55841012 | 0.62938784 | 0.39051217 |
| cg20754348 | NR2F2;NF | 15 | 0.00227742 | 0.34478809 | 0.32305769 | 0.18367398 |
| cg27236629 | NR2F2;NF | 15 | 0.00281906 | 0.50074322 | 0.64562774 | 0.37861765 |
| cg23964820 | NRG1     | 8  | 0.01207774 | 0.3639441  | 0.27359417 | 0.16414843 |
| cg27133711 | NRG1     | 8  | 0.00967401 | 0.50504757 | 0.55162414 | 0.29127073 |
| cg17519477 | NRG3;NR  | 10 | 0.00255413 | 0.7416265  | 0.67994366 | 0.54665467 |
| cg06850159 | NRG3;NR  | 10 | 0.00670817 | 0.42917704 | 0.49758898 | 0.2892594  |
| cg27270412 | NRP1;NR  | 10 | 0.0063644  | 0.86879775 | 0.83098701 | 0.68586277 |
| cg19731541 | NRP2;NR  | 2  | 0.00115308 | 0.69039616 | 0.65979851 | 0.46175196 |
| cg12884814 | NRXN1;N  | 2  | 0.01653772 | 0.609993   | 0.6113118  | 0.50520812 |
| cg10917619 | NRXN1;N  | 2  | 0.01580869 | 0.68647891 | 0.69218938 | 0.57900042 |
| cg08623810 | NRXN2;N  | 11 | 0.00077454 | 0.78902664 | 0.63817743 | 0.39415374 |
| cg14185201 | NRXN3    | 14 | 0.00177039 | 0.33412724 | 0.33605357 | 0.20656704 |
| cg10991579 | NRXN3    | 14 | 0.01479951 | 0.32833463 | 0.32570616 | 0.20415735 |
| cg10037913 | NSMCE1   | 16 | 0.01788219 | 0.60218966 | 0.64030695 | 0.48218404 |
| cg16396933 | NT5C2;NT | 10 | 0.03645999 | 0.56508409 | 0.55538816 | 0.45045936 |
| cg06004033 | NT5DC3   | 12 | 0.0021194  | 0.39865922 | 0.41842131 | 0.28686247 |
| cg00925339 | NT5E     | 6  | 0.00543186 | 0.52451088 | 0.48106222 | 0.3661907  |
| cg12445309 | NTM      | 11 | 0.0007901  | 0.54512983 | 0.4885718  | 0.33677004 |
| cg26567736 | NTM      | 11 | 0.00160662 | 0.44339304 | 0.44009892 | 0.31646284 |
| cg16763885 | NTM;NTM  | 11 | 0.00299824 | 0.25358476 | 0.26358519 | 0.12967581 |
| cg15370309 | NTN1     | 17 | 0.00124266 | 0.65336292 | 0.52683281 | 0.38862605 |
| cg25699759 | NTRK3;NT | 15 | 0.00074801 | 0.83327634 | 0.79379211 | 0.68270995 |
| cg03287527 | NUBP1    | 16 | 0.00068904 | 0.75970792 | 0.68190924 | 0.57836191 |
| cg17467898 | NUDT1;N  | 7  | 0.00485228 | 0.51331966 | 0.49609943 | 0.37332319 |
| cg14530679 | NUDT9;N  | 4  | 0.04489794 | 0.45382453 | 0.47180366 | 0.32774401 |
| cg23878206 | NUP62;A1 | 19 | 0.00262867 | 0.89220128 | 0.86631902 | 0.75019261 |
| cg08496737 | NXF1;NXF | 11 | 0.00375204 | 0.45331602 | 0.44977994 | 0.34910366 |
| cg25505880 | NXF1;NXF | 11 | 0.0037804  | 0.6383535  | 0.56307443 | 0.41066401 |
| cg22237425 | NXN      | 17 | 0.00543186 | 0.66003562 | 0.56300653 | 0.38937308 |
| cg08510234 | NXN      | 17 | 0.00087577 | 0.84140558 | 0.7770986  | 0.54793023 |
| cg13383734 | NXN      | 17 | 0.00077582 | 0.88931922 | 0.84124924 | 0.607718   |
| cg21971800 | NXN      | 17 | 0.01396719 | 0.48291943 | 0.48300408 | 0.34890571 |
| cg03836586 | NXPH1    | 7  | 0.00247433 | 0.20355058 | 0.24543731 | 0.09341015 |
| cg12502577 | NXPH4    | 12 | 0.03346287 | 0.61778787 | 0.62171749 | 0.50175773 |
| cg19789466 | OAS1;OA  | 12 | 0.04164301 | 0.75340441 | 0.76391067 | 0.6511328  |

|            |          |    |            |            |            |            |
|------------|----------|----|------------|------------|------------|------------|
| cg04708790 | OAS1;OA' | 12 | 0.00298225 | 0.63610654 | 0.64118625 | 0.48719003 |
| cg19371652 | OAS2;OA' | 12 | 0.01130868 | 0.67791879 | 0.69242202 | 0.57671928 |
| cg12560128 | OAS2;OA' | 12 | 0.00289141 | 0.67256823 | 0.65369612 | 0.42288247 |
| cg27147785 | OAS2;OA' | 12 | 0.00114056 | 0.3801667  | 0.32680758 | 0.17739882 |
| cg20870559 | OAS2;OA' | 12 | 0.00499723 | 0.36708634 | 0.38698012 | 0.24667258 |
| cg05048523 | OBSCN;O' | 1  | 0.00247655 | 0.86497645 | 0.85130363 | 0.73999064 |
| cg03419458 | OBSCN;O' | 1  | 0.02794807 | 0.66794681 | 0.71534545 | 0.55436213 |
| cg10948657 | OCA2     | 15 | 0.04093366 | 0.84611315 | 0.80567342 | 0.68864117 |
| cg24943998 | OCA2     | 15 | 0.01355936 | 0.53201263 | 0.57147016 | 0.41953102 |
| cg15399926 | OCA2     | 15 | 0.01074556 | 0.7745636  | 0.76250497 | 0.64744473 |
| cg09966895 | ODZ4     | 11 | 0.00065949 | 0.5289542  | 0.36403069 | 0.13661835 |
| cg11983942 | OPCML    | 11 | 0.00118326 | 0.59760763 | 0.57814308 | 0.47028182 |
| cg01875106 | OPCML;O' | 11 | 0.008876   | 0.38991934 | 0.42696551 | 0.25726426 |
| cg17786206 | OPRD1    | 1  | 0.00182779 | 0.33448024 | 0.37943698 | 0.22239341 |
| cg10278025 | OR12D3   | 6  | 0.00791399 | 0.49898741 | 0.52123781 | 0.37862546 |
| cg03019219 | OR14J1   | 6  | 0.00360641 | 0.40663567 | 0.45079916 | 0.28320141 |
| cg03529662 | OR1A1    | 17 | 0.02581149 | 0.37433031 | 0.36280407 | 0.2581992  |
| cg03208902 | OR1F2P   | 16 | 0.0059385  | 0.50457733 | 0.55312419 | 0.31776419 |
| cg05009707 | OR2H2    | 6  | 0.00538453 | 0.4678645  | 0.4676148  | 0.32406913 |
| cg11246007 | OR2H2    | 6  | 0.00714351 | 0.6353632  | 0.63424784 | 0.53028965 |
| cg07483650 | OR2T4    | 1  | 0.00357923 | 0.58773246 | 0.58598474 | 0.46002105 |
| cg05282518 | OR4K2    | 14 | 0.00401281 | 0.34007143 | 0.40317637 | 0.2332716  |
| cg21052687 | OR5D14   | 11 | 0.00725151 | 0.54086412 | 0.56447658 | 0.40712097 |
| cg12750151 | OR5D18   | 11 | 0.00142756 | 0.46595298 | 0.51695132 | 0.35574084 |
| cg18157275 | OR5M10;  | 11 | 0.00589429 | 0.51738388 | 0.55181351 | 0.38395724 |
| cg10906826 | OR6B3    | 2  | 0.00177922 | 0.49877688 | 0.49481796 | 0.3836102  |
| cg19364530 | OR6F1    | 1  | 0.0011414  | 0.44604524 | 0.42489899 | 0.31117783 |
| cg20778958 | OR6P1    | 1  | 0.00704684 | 0.54692155 | 0.60152557 | 0.38755738 |
| cg04948906 | OR8B12   | 11 | 0.0091896  | 0.68089434 | 0.732089   | 0.55754479 |
| cg12453675 | OR8G1    | 11 | 0.00227742 | 0.22510761 | 0.22680886 | 0.10525857 |
| cg27191606 | OR8H2    | 11 | 0.01366893 | 0.37050516 | 0.40331444 | 0.24090743 |
| cg20886721 | OR8U8    | 11 | 0.01423002 | 0.45456956 | 0.49393348 | 0.33763264 |
| cg11052535 | OR8U8;O' | 11 | 0.00184462 | 0.24566824 | 0.26741587 | 0.13773073 |
| cg12011522 | OSBPL6;C | 2  | 0.01321271 | 0.42886427 | 0.44832495 | 0.32255739 |
| cg05539509 | OSM      | 22 | 0.00852388 | 0.56132228 | 0.57422091 | 0.45120825 |
| cg26701390 | OSR1     | 2  | 0.03895844 | 0.71801887 | 0.74573241 | 0.59952216 |
| cg11943209 | OSR1     | 2  | 0.04296377 | 0.61196746 | 0.580596   | 0.4577553  |
| cg02172492 | OSR1     | 2  | 0.01695226 | 0.71130434 | 0.78258545 | 0.5086925  |
| cg22478121 | OSR1     | 2  | 0.00654053 | 0.35796962 | 0.40389183 | 0.25727318 |
| cg27305303 | OTOF     | 2  | 0.02991399 | 0.78109002 | 0.79388713 | 0.67576979 |
| cg10465028 | OTUB1;O' | 11 | 0.00614688 | 0.4493548  | 0.43792525 | 0.29952891 |
| cg20687940 | OTUB1;O' | 11 | 0.00279729 | 0.40231373 | 0.39707923 | 0.27086783 |
| cg04276301 | OTX1     | 2  | 0.03533354 | 0.60939685 | 0.66157804 | 0.44330715 |
| cg15745401 | P2RY6;P2 | 11 | 0.00491697 | 0.59261319 | 0.59501991 | 0.42256237 |
| cg00277342 | P2RY6;P2 | 11 | 0.01148808 | 0.82612904 | 0.8291673  | 0.71881101 |
| cg02652891 | PACRG;P/ | 6  | 0.03934159 | 0.40527489 | 0.43611111 | 0.29947565 |

|            |           |    |            |            |            |            |
|------------|-----------|----|------------|------------|------------|------------|
| cg02940070 | PACSIN2   | 22 | 0.03502867 | 0.80488838 | 0.79089663 | 0.50736336 |
| cg03513388 | PADI3     | 1  | 0.00835301 | 0.45259682 | 0.42529154 | 0.3203412  |
| cg23228178 | PADI4     | 1  | 0.00178025 | 0.58633916 | 0.5307729  | 0.40630258 |
| cg16091981 | PADI4     | 1  | 0.00904361 | 0.43657139 | 0.45814874 | 0.29979232 |
| cg00665650 | PAIP2;PAI | 5  | 0.03969411 | 0.42016686 | 0.45456015 | 0.31218865 |
| cg13866253 | PAK1;PAK  | 11 | 0.00177192 | 0.90285084 | 0.8914397  | 0.79043125 |
| cg24784416 | PALLD;PA  | 4  | 0.0069951  | 0.83123586 | 0.79573069 | 0.66283741 |
| cg05259872 | PALLD;PA  | 4  | 0.01614766 | 0.76405134 | 0.81351997 | 0.58486414 |
| cg03822639 | PALLD;PA  | 4  | 0.04127719 | 0.78420846 | 0.81488477 | 0.66368551 |
| cg08947774 | PALLD;PA  | 4  | 0.00614711 | 0.76819164 | 0.7517786  | 0.55542478 |
| cg24101009 | PANX1     | 11 | 0.00073265 | 0.67670503 | 0.56157949 | 0.43197605 |
| cg15542639 | PANX1     | 11 | 0.00097053 | 0.8921455  | 0.84003283 | 0.73377038 |
| cg00860359 | PANX2;PA  | 22 | 0.02196399 | 0.61890507 | 0.59624099 | 0.47130236 |
| cg18563886 | PAOX;PAO  | 10 | 0.03758612 | 0.57678259 | 0.64655855 | 0.4601285  |
| cg00744494 | PAPLN     | 14 | 0.03213335 | 0.6216934  | 0.68873874 | 0.50109958 |
| cg14094498 | PAPPA     | 9  | 0.00084594 | 0.73587326 | 0.73582303 | 0.5867832  |
| cg10447404 | PARD3     | 10 | 0.0198367  | 0.50460143 | 0.46378178 | 0.36151339 |
| cg19017553 | PARD3     | 10 | 0.00194312 | 0.84694011 | 0.78777795 | 0.6655625  |
| cg06271128 | PARD3     | 10 | 0.0075368  | 0.33705872 | 0.316709   | 0.19130163 |
| cg23270841 | PARD3B;F  | 2  | 0.0190357  | 0.58026598 | 0.62426674 | 0.47998229 |
| cg13072214 | PARP10    | 8  | 0.03169761 | 0.67236222 | 0.65892298 | 0.55803235 |
| cg02346790 | PARP15    | 3  | 0.00855208 | 0.46714906 | 0.54486289 | 0.34449438 |
| cg20765408 | PARP4     | 13 | 0.00261671 | 0.37191975 | 0.32467972 | 0.20761342 |
| cg05014660 | PARVG;PA  | 22 | 0.01598777 | 0.38285046 | 0.41212581 | 0.25492209 |
| cg11163555 | PATZ1;PA  | 22 | 0.00912728 | 0.36086494 | 0.30239734 | 0.19152587 |
| cg20735988 | PBLD;PBL  | 10 | 0.02078916 | 0.33376537 | 0.31776653 | 0.20152313 |
| cg26558862 | PBRM1;PI  | 3  | 0.00066232 | 0.81397649 | 0.7268054  | 0.61642299 |
| cg20765522 | PBX2      | 6  | 0.01562094 | 0.56473198 | 0.56521341 | 0.46316134 |
| cg27149567 | PCBP3;PC  | 21 | 0.00511478 | 0.57238436 | 0.49732988 | 0.34153262 |
| cg15901722 | PCDH24    | 5  | 0.01234308 | 0.25473948 | 0.25920877 | 0.14919585 |
| cg14369318 | PCDH7     | 4  | 0.0167445  | 0.60477002 | 0.61897202 | 0.43630427 |
| cg10707081 | PCDH9;PC  | 13 | 0.00303952 | 0.50147144 | 0.59855381 | 0.36450367 |
| cg14205864 | PCID2;PCI | 13 | 0.00065949 | 0.81450117 | 0.68387945 | 0.47981716 |
| cg01966277 | PCLO      | 7  | 0.00431388 | 0.60792935 | 0.60777414 | 0.38743772 |
| cg21234538 | PCNT      | 21 | 0.00209654 | 0.89712444 | 0.89061251 | 0.69636826 |
| cg07869023 | PCSK2     | 20 | 0.00228672 | 0.62463385 | 0.68713869 | 0.47814275 |
| cg14453145 | PDCD1     | 2  | 0.00074801 | 0.60700313 | 0.52627138 | 0.3942086  |
| cg17457379 | PDE4DIP   | 1  | 0.0025887  | 0.69841843 | 0.66543612 | 0.55796293 |
| cg23933216 | PDE4DIP   | 1  | 0.0129037  | 0.42932324 | 0.42442597 | 0.32313456 |
| cg10505902 | PDE4DIP;I | 1  | 0.00071094 | 0.75657883 | 0.70794378 | 0.59584744 |
| cg11164441 | PDE6B;PC  | 4  | 0.00107905 | 0.80817801 | 0.80252423 | 0.63432252 |
| cg12546582 | PDE7B     | 6  | 0.00327239 | 0.85031818 | 0.82168939 | 0.70287089 |
| cg24240349 | PDGFA;PI  | 7  | 0.00156458 | 0.79500947 | 0.71429286 | 0.60405583 |
| cg20070933 | PDGFA;PI  | 7  | 0.00092849 | 0.93078717 | 0.87317417 | 0.76525179 |
| cg16375048 | PDGFC     | 4  | 0.00522751 | 0.74157015 | 0.71131874 | 0.58472548 |
| cg18688704 | PDGFC     | 4  | 0.03302702 | 0.38050174 | 0.42215696 | 0.25446601 |

|            |            |    |            |            |            |            |
|------------|------------|----|------------|------------|------------|------------|
| cg03020863 | PDGFD;PI   | 11 | 0.00248997 | 0.60905696 | 0.601946   | 0.40933681 |
| cg20449614 | PDLIM2;P   | 8  | 0.03916836 | 0.74839102 | 0.77967118 | 0.63410284 |
| cg02484352 | PDLIM4;P   | 5  | 0.00065949 | 0.6720797  | 0.54219012 | 0.4187731  |
| cg02383173 | PDLIM5;P   | 4  | 0.04275864 | 0.61621508 | 0.64378632 | 0.47952431 |
| cg20210051 | PDZRN4;F   | 12 | 0.00412385 | 0.55902577 | 0.53239899 | 0.38046332 |
| cg04368094 | PELI2      | 14 | 0.04153301 | 0.45680362 | 0.45913298 | 0.35554389 |
| cg04397884 | PELI2      | 14 | 0.02002893 | 0.31970779 | 0.31279582 | 0.20996845 |
| cg05014727 | PFKFB3     | 10 | 0.00230932 | 0.77791291 | 0.73003577 | 0.52960605 |
| cg08994060 | PFKFB3     | 10 | 0.00249039 | 0.78608076 | 0.74331247 | 0.57666517 |
| cg26262157 | PFKFB3     | 10 | 0.00317432 | 0.74974397 | 0.71207288 | 0.49620119 |
| cg10517290 | PGS1       | 17 | 0.00894518 | 0.71468444 | 0.70987788 | 0.54752983 |
| cg21216268 | PHC3       | 3  | 0.00967401 | 0.7523979  | 0.74639278 | 0.64513904 |
| cg21328779 | PHLDB2;P   | 3  | 0.00142669 | 0.26531953 | 0.28063349 | 0.12451775 |
| cg16978268 | PHLPP1     | 18 | 0.03849619 | 0.37747392 | 0.33899836 | 0.22670634 |
| cg02960777 | PHTF2;PH   | 7  | 0.0019957  | 0.86481438 | 0.82966313 | 0.70886741 |
| cg09304624 | PI15       | 8  | 0.00812661 | 0.59267077 | 0.60755168 | 0.42815598 |
| cg00961792 | PIGR       | 1  | 0.00144775 | 0.59079461 | 0.58690114 | 0.48292886 |
| cg21723559 | PIGT       | 20 | 0.0012838  | 0.81719282 | 0.76464762 | 0.65888701 |
| cg04287259 | PIK3CD     | 1  | 0.00566397 | 0.80146019 | 0.82278386 | 0.69930699 |
| cg07805542 | PIK3CD     | 1  | 0.00679225 | 0.35158199 | 0.33034314 | 0.18185622 |
| cg04610450 | PIK3R2     | 19 | 0.01773077 | 0.75707281 | 0.78205035 | 0.65499566 |
| cg08697847 | PIK3R6     | 17 | 0.03153468 | 0.45430855 | 0.51560754 | 0.34900123 |
| cg24092340 | PIK3R6;PI  | 17 | 0.03699135 | 0.68559421 | 0.72049816 | 0.58137368 |
| cg09209669 | PIK3R6;PI  | 17 | 0.00356659 | 0.39309857 | 0.47232666 | 0.29114487 |
| cg11969526 | PIKFYVE;F  | 2  | 0.04942609 | 0.77077078 | 0.78881012 | 0.67030268 |
| cg14062643 | PIP5KL1;P  | 9  | 0.00065949 | 0.77704003 | 0.54755399 | 0.43548877 |
| cg01768814 | PITPNC1;I  | 17 | 0.03053716 | 0.3395183  | 0.33161495 | 0.19150992 |
| cg00396667 | PITX1      | 5  | 0.02818766 | 0.68289335 | 0.64414216 | 0.51521344 |
| cg19304088 | PITX2;PIT. | 4  | 0.00097618 | 0.38830745 | 0.35862105 | 0.14658473 |
| cg09781994 | PITX2;PIT. | 4  | 0.00183659 | 0.562013   | 0.52793231 | 0.32857708 |
| cg13891220 | PITX2;PIT. | 4  | 0.0008708  | 0.3096692  | 0.39681078 | 0.1610883  |
| cg21299542 | PITX2;PIT. | 4  | 0.00112235 | 0.2347877  | 0.24772615 | 0.12258724 |
| cg03184290 | PITX2;PIT. | 4  | 0.00262147 | 0.54553067 | 0.51084564 | 0.31204983 |
| cg26831119 | PITX2;PIT. | 4  | 0.00689691 | 0.51869661 | 0.53830217 | 0.31048188 |
| cg01951086 | PITX2;PIT. | 4  | 0.00597821 | 0.46139688 | 0.44205677 | 0.25039692 |
| cg02725370 | PITX2;PIT. | 4  | 0.00220808 | 0.42290875 | 0.42053921 | 0.20964348 |
| cg21029045 | PITX2;PIT. | 4  | 0.00614711 | 0.24580707 | 0.26557685 | 0.12641169 |
| cg26708319 | PITX2;PIT. | 4  | 0.00144772 | 0.44600076 | 0.44699544 | 0.2261066  |
| cg03943773 | PITX2;PIT. | 4  | 0.00126466 | 0.27669286 | 0.34842048 | 0.15057719 |
| cg24925400 | PITX2;PIT. | 4  | 0.00217555 | 0.41818305 | 0.4059569  | 0.20304859 |
| cg09854515 | PITX2;PIT. | 4  | 0.01422483 | 0.6324812  | 0.66325797 | 0.42999911 |
| cg19829847 | PITX2;PIT. | 4  | 0.01235814 | 0.6683175  | 0.67196263 | 0.48716407 |
| cg06842954 | PITX2;PIT. | 4  | 0.00205127 | 0.62742674 | 0.61694351 | 0.46687514 |
| cg13385016 | PITX2;PIT. | 4  | 0.02505273 | 0.68473913 | 0.67269696 | 0.54736984 |
| cg13736376 | PITX2;PIT. | 4  | 0.00231646 | 0.30524715 | 0.31177577 | 0.1837677  |
| cg20291436 | PITX2;PIT. | 4  | 0.00327239 | 0.45785196 | 0.48168492 | 0.26841466 |



|             |           |    |            |            |            |            |
|-------------|-----------|----|------------|------------|------------|------------|
| cg03972665  | PITX2;PIT | 4  | 0.00262855 | 0.63554802 | 0.64664836 | 0.4676108  |
| cg08979895  | PITX2;PIT | 4  | 0.03314909 | 0.51551706 | 0.53151706 | 0.36420906 |
| cg10055501  | PITX2;PIT | 4  | 0.00260155 | 0.71549236 | 0.70247614 | 0.53410086 |
| cg21726372  | PITX2;PIT | 4  | 0.00206218 | 0.70520046 | 0.67360364 | 0.479284   |
| cg031444922 | PITX2;PIT | 4  | 0.00159552 | 0.74746572 | 0.73822659 | 0.5846897  |
| cg27398720  | PITX2;PIT | 4  | 0.0039383  | 0.53194417 | 0.58967303 | 0.35109594 |
| cg22914729  | PITX2;PIT | 4  | 0.00314361 | 0.44549644 | 0.50510539 | 0.26596403 |
| cg01371072  | PITX2;PIT | 4  | 0.00503319 | 0.40539642 | 0.41530378 | 0.24569048 |
| cg17507671  | PITX2;PIT | 4  | 0.00486472 | 0.28068829 | 0.30243505 | 0.17719793 |
| cg05030680  | PITX2;PIT | 4  | 0.00648443 | 0.46116085 | 0.45011728 | 0.33321342 |
| cg16184803  | PITX2;PIT | 4  | 0.00186737 | 0.29588998 | 0.3111806  | 0.18181663 |
| cg22717014  | PITX2;PIT | 4  | 0.00429383 | 0.51042695 | 0.48968255 | 0.35149869 |
| cg05835105  | PITX2;PIT | 4  | 0.00349009 | 0.38582784 | 0.3630821  | 0.20230751 |
| cg14308375  | PITX2;PIT | 4  | 0.00183809 | 0.33218246 | 0.35999535 | 0.19142693 |
| cg17929238  | PITX2;PIT | 4  | 0.02568798 | 0.51891235 | 0.58085871 | 0.3767503  |
| cg03594078  | PIWIL2;PI | 8  | 0.04178799 | 0.75542286 | 0.77469338 | 0.62134913 |
| cg12858593  | PIWIL2;PI | 8  | 0.00429038 | 0.64480283 | 0.58019455 | 0.40231261 |
| cg00163702  | PKD1L2;P  | 16 | 0.00403008 | 0.76372271 | 0.7820004  | 0.65722366 |
| cg09270285  | PKNOX2    | 11 | 0.00554761 | 0.48591744 | 0.49422072 | 0.32971722 |
| cg22193393  | PLA2G4E   | 15 | 0.0269694  | 0.60608334 | 0.63666199 | 0.47117543 |
| cg18981758  | PLA2G6;P  | 22 | 0.00081925 | 0.78034892 | 0.69908065 | 0.5844309  |
| cg09920804  | PLAT;PLA  | 8  | 0.00109472 | 0.79054776 | 0.71060147 | 0.53027849 |
| cg21931938  | PLCB2     | 15 | 0.0035378  | 0.36511999 | 0.40750958 | 0.22794249 |
| cg24624873  | PLCE1;PLC | 10 | 0.00244246 | 0.60684582 | 0.66188813 | 0.46853252 |
| cg16503724  | PLCL2;PLC | 3  | 0.00284268 | 0.46149644 | 0.4315222  | 0.30067028 |
| cg21535931  | PLEC1;PLI | 8  | 0.01540791 | 0.78710831 | 0.75442334 | 0.59561787 |
| cg20784950  | PLEC1;PLI | 8  | 0.02995719 | 0.62225335 | 0.6180579  | 0.45283798 |
| cg22258045  | PLEC1;PLI | 8  | 0.01488914 | 0.73749262 | 0.73450049 | 0.62324364 |
| cg02861056  | PLEK;PLEK | 2  | 0.00287155 | 0.67335092 | 0.63867553 | 0.50763305 |
| cg13060970  | PLEK;PLEK | 2  | 0.00180518 | 0.69315673 | 0.65270155 | 0.53274352 |
| cg04872689  | PLEK;PLEK | 2  | 0.00303201 | 0.70120982 | 0.6561953  | 0.46162183 |
| cg10812236  | PLEK;PLEK | 2  | 0.00367708 | 0.71189908 | 0.68397101 | 0.46021285 |
| cg02556345  | PLEKHA1;  | 10 | 0.00148902 | 0.66091974 | 0.57909694 | 0.42885452 |
| cg01073837  | PLEKHA2   | 8  | 0.00280849 | 0.39349029 | 0.455464   | 0.26490026 |
| cg01767200  | PLEKHG4I  | 5  | 0.01083395 | 0.86849829 | 0.86686083 | 0.75641235 |
| cg07533239  | PLEKHG6;  | 12 | 0.00157573 | 0.68918472 | 0.65506219 | 0.52349596 |
| cg11524454  | PLEKHG7   | 12 | 0.00104452 | 0.62881542 | 0.58007842 | 0.39139452 |
| cg00186909  | PLEKHG7   | 12 | 0.00989055 | 0.6838955  | 0.74871192 | 0.54356733 |
| cg05939149  | PLEKHH2   | 2  | 0.00358325 | 0.86182377 | 0.83631606 | 0.7275461  |
| cg05652225  | PLXDC1    | 17 | 0.00146929 | 0.51883958 | 0.4706007  | 0.35542896 |
| cg02736746  | PLXNA2    | 1  | 0.00971058 | 0.5105028  | 0.50649338 | 0.35911959 |
| cg16850690  | PLXND1    | 3  | 0.0127705  | 0.76615982 | 0.75604867 | 0.59389426 |
| cg01117384  | PMEPA1;I  | 20 | 0.00126804 | 0.49532758 | 0.43789317 | 0.28631802 |
| cg00587342  | PMM1      | 22 | 0.00263672 | 0.70015141 | 0.62257845 | 0.49722514 |
| cg12894984  | PNMT      | 17 | 0.00220808 | 0.56660222 | 0.55635113 | 0.42138851 |
| cg22027204  | PNPLA1;P  | 6  | 0.00242331 | 0.64282646 | 0.61322262 | 0.39534057 |

|            |           |    |            |            |            |            |
|------------|-----------|----|------------|------------|------------|------------|
| cg17921363 | POFUT2;F  | 21 | 0.03301459 | 0.75378499 | 0.69684818 | 0.5852519  |
| cg05673882 | POLK      | 5  | 0.00115897 | 0.51613573 | 0.46344993 | 0.24520064 |
| cg00201870 | POM121L   | 7  | 0.00435264 | 0.54870717 | 0.56790844 | 0.42945459 |
| cg21862081 | POMT2     | 14 | 0.00109472 | 0.77777389 | 0.73932552 | 0.63080262 |
| cg10324703 | POU6F2;F  | 7  | 0.0048909  | 0.4278685  | 0.42310611 | 0.32008819 |
| cg07676920 | PPARG;PF  | 3  | 0.01398164 | 0.82471081 | 0.78448063 | 0.68119807 |
| cg20872072 | PPM1G;P   | 2  | 0.00295711 | 0.78903519 | 0.75399416 | 0.65117006 |
| cg20793532 | PPP2R2C;  | 4  | 0.01608519 | 0.45048462 | 0.42400625 | 0.28988013 |
| cg22325673 | PPP2R2C;  | 4  | 0.00232154 | 0.57664664 | 0.57260328 | 0.46634353 |
| cg20910008 | PPP3CC    | 8  | 0.00546612 | 0.85883478 | 0.86242542 | 0.69637199 |
| cg08752433 | PPTC7     | 12 | 0.01296171 | 0.82934643 | 0.8371621  | 0.70646812 |
| cg23878241 | PPTC7     | 12 | 0.00742222 | 0.63503114 | 0.63038801 | 0.49411371 |
| cg27382409 | PPYR1     | 10 | 0.00152405 | 0.50196343 | 0.4764207  | 0.36353891 |
| cg01556246 | PRAGMIN   | 8  | 0.00314361 | 0.44120451 | 0.45894439 | 0.26865039 |
| cg27345534 | PRB1;PRB  | 12 | 0.00908203 | 0.76060902 | 0.74557889 | 0.64178558 |
| cg08369079 | PRDM1;P   | 6  | 0.02679222 | 0.63718566 | 0.65691168 | 0.49815679 |
| cg08381918 | PRDM15;   | 21 | 0.01183594 | 0.80356374 | 0.87771255 | 0.70132756 |
| cg04852443 | PRDM16;   | 1  | 0.01317683 | 0.63588268 | 0.64240248 | 0.48363555 |
| cg09321238 | PRDM16;   | 1  | 0.01237894 | 0.7119099  | 0.72783467 | 0.49893011 |
| cg01104489 | PRDM16;   | 1  | 0.01864666 | 0.69086762 | 0.72632518 | 0.51104719 |
| cg01448098 | PRDM16;   | 1  | 0.02792018 | 0.68418652 | 0.71520522 | 0.5402479  |
| cg20699701 | PRDM16;   | 1  | 0.03722047 | 0.61143814 | 0.63431342 | 0.50880523 |
| cg18759102 | PRDM16;   | 1  | 0.01123239 | 0.7191506  | 0.792186   | 0.60614312 |
| cg06099439 | PRDM16;   | 1  | 0.00704342 | 0.87126556 | 0.85461876 | 0.74314817 |
| cg03527274 | PRDM16;   | 1  | 0.00441129 | 0.74880072 | 0.71917458 | 0.58097177 |
| cg03082523 | PRDM16;   | 1  | 0.00233439 | 0.87969412 | 0.88150116 | 0.76392872 |
| cg27187555 | PRDM16;   | 1  | 0.01073914 | 0.66668249 | 0.63253036 | 0.51038922 |
| cg01085125 | PRDM6     | 5  | 0.01935097 | 0.68227237 | 0.66946865 | 0.4436029  |
| cg04503968 | PRDM6     | 5  | 0.00303542 | 0.72992054 | 0.71684243 | 0.49082441 |
| cg02300584 | PRDM6     | 5  | 0.02521286 | 0.56797995 | 0.58361717 | 0.41096544 |
| cg05569742 | PRDM6     | 5  | 0.02763355 | 0.58685857 | 0.60743045 | 0.39914958 |
| cg07741162 | PRDM6     | 5  | 0.00539114 | 0.66555588 | 0.72172033 | 0.43069326 |
| cg03729337 | PRDM6     | 5  | 0.01526804 | 0.7151257  | 0.77596994 | 0.56033627 |
| cg02564291 | PRDM6     | 5  | 0.02087024 | 0.65104212 | 0.69068826 | 0.48722488 |
| cg17786697 | PRDM6     | 5  | 0.00582851 | 0.64332595 | 0.66056256 | 0.42567797 |
| cg03776662 | PRDM6     | 5  | 0.01064534 | 0.32399029 | 0.33620755 | 0.2238315  |
| cg07799386 | PRDM6     | 5  | 0.0029375  | 0.41962913 | 0.43837379 | 0.29552047 |
| cg05668996 | PRDM6     | 5  | 0.00891192 | 0.52543137 | 0.64156472 | 0.41733463 |
| cg15262954 | PRIC285;F | 20 | 0.01789965 | 0.69402761 | 0.7449294  | 0.57065809 |
| cg20584157 | PRICKLE2  | 3  | 0.00264208 | 0.7367312  | 0.68405043 | 0.53326166 |
| cg03567939 | PRKAG2;F  | 7  | 0.00065949 | 0.80688996 | 0.70033042 | 0.57853583 |
| cg06728793 | PRKAR1B;  | 7  | 0.0033331  | 0.77332638 | 0.74649075 | 0.57652563 |
| cg12304937 | PRKAR1B;  | 7  | 0.00134844 | 0.75420168 | 0.72736355 | 0.61936062 |
| cg04721825 | PRKCA     | 17 | 0.01471848 | 0.70002345 | 0.75642827 | 0.57442115 |
| cg03543319 | PROKR1    | 2  | 0.0154705  | 0.47007232 | 0.50708351 | 0.32260502 |
| cg17626960 | PRRT1     | 6  | 0.04839114 | 0.57504635 | 0.65156125 | 0.46026472 |

|            |          |    |            |            |            |            |
|------------|----------|----|------------|------------|------------|------------|
| cg02897989 | PRRX1;PR | 1  | 0.02878476 | 0.5305222  | 0.56337835 | 0.42723014 |
| cg25181170 | PRTFDC1  | 10 | 0.00348701 | 0.82683107 | 0.88817701 | 0.71420539 |
| cg20633213 | PRTFDC1  | 10 | 0.00245414 | 0.86023255 | 0.83766551 | 0.71377737 |
| cg17004025 | PRTN3    | 19 | 0.03657758 | 0.50282193 | 0.48643338 | 0.38416981 |
| cg13914324 | PRUNE2   | 9  | 0.02944061 | 0.46073466 | 0.49407313 | 0.33630732 |
| cg07526408 | PSG10    | 19 | 0.04399614 | 0.36843111 | 0.3608506  | 0.23918463 |
| cg16197388 | PSG3     | 19 | 0.01760238 | 0.4419504  | 0.46118417 | 0.32157338 |
| cg11706729 | PSMB8;PS | 6  | 0.01499384 | 0.74380283 | 0.73250291 | 0.5763667  |
| cg02567488 | PSMB9;PS | 6  | 0.0026334  | 0.4135236  | 0.42128451 | 0.2334967  |
| cg18369034 | PTGDR    | 14 | 0.00073547 | 0.71205732 | 0.58773081 | 0.36403176 |
| cg23022053 | PTGDR    | 14 | 0.01268304 | 0.72996203 | 0.62028031 | 0.36405342 |
| cg01091117 | PTGER4   | 5  | 0.01158752 | 0.61768557 | 0.62968191 | 0.43838002 |
| cg16060930 | PTGFRN   | 1  | 0.00810421 | 0.74897317 | 0.68332049 | 0.32454319 |
| cg15430294 | PTGIR    | 19 | 0.01678972 | 0.63986039 | 0.67096228 | 0.52080401 |
| cg11641102 | PTK2B;PT | 8  | 0.00198593 | 0.55530141 | 0.48224221 | 0.3017133  |
| cg21578195 | PTK6     | 20 | 0.02970062 | 0.57291558 | 0.57090591 | 0.45300368 |
| cg25143652 | PTK6;PTK | 20 | 0.00689691 | 0.66836685 | 0.68231881 | 0.47099144 |
| cg20386404 | PTPN14   | 1  | 0.00213077 | 0.46718738 | 0.43333415 | 0.24188129 |
| cg15702949 | PTPN18;P | 2  | 0.02103552 | 0.52768808 | 0.52882597 | 0.42647209 |
| cg07111834 | PTPN22;P | 1  | 0.04433808 | 0.73907995 | 0.76678834 | 0.62567758 |
| cg09887955 | PTPN7;PT | 1  | 0.00658287 | 0.53463717 | 0.57874623 | 0.42265368 |
| cg00238353 | PTPRE    | 10 | 0.00882698 | 0.41647183 | 0.32454706 | 0.22338099 |
| cg07053114 | PTPRE    | 10 | 0.00581095 | 0.57791578 | 0.56885353 | 0.42283845 |
| cg07986469 | PTPRE    | 10 | 0.00190306 | 0.5887042  | 0.53707034 | 0.35607634 |
| cg03900492 | PTPRN2;P | 7  | 0.00084179 | 0.55999299 | 0.58812908 | 0.40232911 |
| cg04996300 | PTPRN2;P | 7  | 0.00441677 | 0.58759431 | 0.56011579 | 0.42282245 |
| cg22128328 | PTPRN2;P | 7  | 0.00271748 | 0.54084291 | 0.49396859 | 0.37227356 |
| cg25910519 | PTPRN2;P | 7  | 0.01174797 | 0.45094549 | 0.43257909 | 0.31530863 |
| cg03232056 | PTPRN2;P | 7  | 0.01093065 | 0.42286764 | 0.44823845 | 0.30165996 |
| cg14468481 | PTPRN2;P | 7  | 0.00349009 | 0.55918117 | 0.53388803 | 0.35986844 |
| cg24842334 | PTPRN2;P | 7  | 0.02291377 | 0.48435138 | 0.51810349 | 0.37010982 |
| cg14582691 | PTPRN2;P | 7  | 0.01530568 | 0.71656711 | 0.73725191 | 0.57596557 |
| cg17429772 | PTPRN2;P | 7  | 0.0026461  | 0.26992465 | 0.26337748 | 0.15796699 |
| cg22337920 | PTPRN2;P | 7  | 0.00220808 | 0.51502596 | 0.49953336 | 0.39693698 |
| cg12434889 | PTPRN2;P | 7  | 0.00629716 | 0.39488973 | 0.37746303 | 0.26479943 |
| cg02100997 | PTPRU;PT | 1  | 0.01471848 | 0.45209188 | 0.51917459 | 0.34571415 |
| cg07856761 | PVALB    | 22 | 0.01767742 | 0.44735816 | 0.44921001 | 0.32676777 |
| cg23898497 | PVT1     | 8  | 0.02895902 | 0.61807019 | 0.58897458 | 0.48514843 |
| cg26753608 | PVT1     | 8  | 0.00092387 | 0.86067737 | 0.79345426 | 0.67270761 |
| cg03402443 | PWRN1    | 15 | 0.02009425 | 0.69008463 | 0.68057836 | 0.57703816 |
| cg08216099 | PXDN     | 2  | 0.00066232 | 0.76245067 | 0.60752914 | 0.39400701 |
| cg08293102 | PYGL;PYG | 14 | 0.01329117 | 0.64903545 | 0.67238655 | 0.53150454 |
| cg05732883 | PYROXD2  | 10 | 0.00971274 | 0.80707372 | 0.82306341 | 0.6947203  |
| cg26712743 | PYROXD2  | 10 | 0.00173154 | 0.57171597 | 0.5669787  | 0.41621781 |
| cg17960615 | RAB31    | 18 | 0.00229687 | 0.75185997 | 0.73315032 | 0.48810171 |
| cg14066471 | RAB37    | 17 | 0.00594191 | 0.31521377 | 0.29578619 | 0.179134   |

|            |          |    |            |            |            |            |
|------------|----------|----|------------|------------|------------|------------|
| cg22213445 | RAB7A    | 3  | 0.0439181  | 0.65302136 | 0.66747795 | 0.53527403 |
| cg10777887 | RAB8B    | 15 | 0.00840111 | 0.77410119 | 0.77806659 | 0.6430727  |
| cg02747950 | RAB8B    | 15 | 0.02377716 | 0.7320101  | 0.74670616 | 0.60535679 |
| cg25603108 | RAD51L1; | 14 | 0.00597656 | 0.42271126 | 0.3603137  | 0.23439398 |
| cg08297686 | RAD51L1; | 14 | 0.00346969 | 0.71773613 | 0.7224274  | 0.50739825 |
| cg14260083 | RADIL    | 7  | 0.01093065 | 0.68891098 | 0.68231204 | 0.57033401 |
| cg14083146 | RALGAPA  | 20 | 0.00476313 | 0.55600252 | 0.58598141 | 0.39882793 |
| cg08622666 | RANBP9   | 6  | 0.00205947 | 0.81866056 | 0.80253868 | 0.68977426 |
| cg06205333 | RAP1A;RA | 1  | 0.00969263 | 0.71361962 | 0.68402163 | 0.50234696 |
| cg18553223 | RAP1GAP  | 17 | 0.02086555 | 0.58993907 | 0.65381179 | 0.45929516 |
| cg09981407 | RAP1GAP  | 17 | 0.03389831 | 0.46477537 | 0.50043223 | 0.35271862 |
| cg13784312 | RAPGEF1  | 9  | 0.02447745 | 0.76667701 | 0.77419666 | 0.58908689 |
| cg13655250 | RAPGEF1; | 9  | 0.00637687 | 0.6326555  | 0.61645989 | 0.46883233 |
| cg22900476 | RAPGEF4  | 2  | 0.00336153 | 0.77104588 | 0.78074518 | 0.57550274 |
| cg11094248 | RARA;RAF | 17 | 0.02507257 | 0.75975343 | 0.77231133 | 0.61730559 |
| cg07944862 | RARA;RAF | 17 | 0.04373093 | 0.70784114 | 0.69670443 | 0.5954753  |
| cg14986890 | RARRES1; | 3  | 0.00160273 | 0.56700896 | 0.40105044 | 0.22346944 |
| cg04402088 | RASA3    | 13 | 0.00065949 | 0.86809453 | 0.79264078 | 0.67381541 |
| cg10976218 | RASA3    | 13 | 0.0037804  | 0.72431869 | 0.67053654 | 0.49406711 |
| cg11288831 | RASA3    | 13 | 0.00826879 | 0.75981498 | 0.76039301 | 0.53182961 |
| cg15972148 | RASA3    | 13 | 0.00412512 | 0.84875499 | 0.82732851 | 0.68262246 |
| cg16046375 | RASA3    | 13 | 0.00368022 | 0.76041573 | 0.7154932  | 0.423456   |
| cg01811815 | RASA3    | 13 | 0.00947108 | 0.74647489 | 0.79541852 | 0.57399068 |
| cg05504085 | RASAL3   | 19 | 0.00576931 | 0.45071897 | 0.42575496 | 0.30419199 |
| cg04707603 | RASGRP3; | 2  | 0.02317852 | 0.69957431 | 0.69484817 | 0.57918234 |
| cg01932734 | RASSF1;R | 3  | 0.00859639 | 0.50125062 | 0.59142529 | 0.37926642 |
| cg12691994 | RASSF5;R | 1  | 0.02766761 | 0.71637454 | 0.72662773 | 0.61002518 |
| cg10992219 | RB1CC1;R | 8  | 0.00113577 | 0.76836338 | 0.7546596  | 0.53292197 |
| cg15168816 | RBM24;R  | 6  | 0.00242331 | 0.40613645 | 0.39339081 | 0.26503785 |
| cg14466942 | RBM24;R  | 6  | 0.00185385 | 0.65933208 | 0.6612608  | 0.50755679 |
| cg02066331 | RBM24;R  | 6  | 0.00758031 | 0.5334861  | 0.53303184 | 0.41057786 |
| cg00137234 | RBM46    | 4  | 0.01946986 | 0.43261144 | 0.46728661 | 0.31071442 |
| cg22062068 | RBMXL2   | 11 | 0.01653351 | 0.60817802 | 0.6163024  | 0.45588893 |
| cg02837128 | RBPM5;R  | 8  | 0.02002893 | 0.45624339 | 0.46406965 | 0.33234865 |
| cg02552250 | RCBTB2   | 13 | 0.01332118 | 0.59635073 | 0.64087277 | 0.48624115 |
| cg09829263 | RCBTB2   | 13 | 0.00961487 | 0.58244547 | 0.65295922 | 0.4502562  |
| cg11093142 | RCBTB2   | 13 | 0.00369903 | 0.79722288 | 0.82930461 | 0.58955127 |
| cg15359390 | REG1P    | 2  | 0.00081789 | 0.6686578  | 0.64589434 | 0.53174631 |
| cg15692837 | REG3A;RE | 2  | 0.00168532 | 0.49606112 | 0.53284006 | 0.36818407 |
| cg07184423 | REPS1;RE | 6  | 0.03302702 | 0.68851715 | 0.73222338 | 0.57653972 |
| cg02098619 | RERE;RER | 1  | 0.01414127 | 0.60243576 | 0.64157979 | 0.48787817 |
| cg20316440 | RERE;RER | 1  | 0.03954748 | 0.52659856 | 0.53777138 | 0.40650625 |
| cg10464462 | RFFL     | 17 | 0.01730009 | 0.61428901 | 0.66608839 | 0.49790368 |
| cg11184109 | RFT1     | 3  | 0.00513612 | 0.59418498 | 0.53336149 | 0.35996669 |
| cg13026795 | RFTN1    | 3  | 0.00685368 | 0.51529296 | 0.55020574 | 0.37106945 |
| cg00506299 | RFTN1    | 3  | 0.02568798 | 0.86525863 | 0.84714983 | 0.73903898 |

|             |          |    |            |            |            |            |
|-------------|----------|----|------------|------------|------------|------------|
| cg04381957  | RFTN1    | 3  | 0.00279686 | 0.68864843 | 0.72708453 | 0.45993289 |
| cg00259834  | RFTN1    | 3  | 0.00367708 | 0.59331786 | 0.58553404 | 0.33298749 |
| cg05991009  | RFX8     | 2  | 0.00741553 | 0.82135756 | 0.85057938 | 0.68153282 |
| cg15611912  | RGS10    | 10 | 0.00227382 | 0.58712575 | 0.54100683 | 0.35283851 |
| cg18944752  | RGS12;RC | 4  | 0.00103895 | 0.41658825 | 0.29535629 | 0.18862914 |
| cg25461508  | RGS14    | 5  | 0.02991399 | 0.33010848 | 0.33780273 | 0.21627619 |
| cg24028809  | RGS17    | 6  | 0.01040141 | 0.70531849 | 0.69883743 | 0.45973363 |
| cg10299383  | RGS20;RC | 8  | 0.00134295 | 0.66853241 | 0.65593129 | 0.50082114 |
| cg11993173  | RGS20;RC | 8  | 0.02944061 | 0.51901153 | 0.53158018 | 0.34111377 |
| cg13604445  | RGS3;RGS | 9  | 0.00306113 | 0.44138396 | 0.42055116 | 0.22439844 |
| cg18515872  | RGS6     | 14 | 0.00572656 | 0.62020292 | 0.58249106 | 0.39172924 |
| cg21899942  | RGS6     | 14 | 0.01959183 | 0.69928016 | 0.70413799 | 0.54739969 |
| cg05111779  | RGS6     | 14 | 0.00224325 | 0.62681605 | 0.55561651 | 0.41593811 |
| cg25329734  | RGS9;RGS | 17 | 0.00355472 | 0.24112518 | 0.23923106 | 0.12947829 |
| cg24497361  | RHOG     | 11 | 0.00663932 | 0.51147222 | 0.50254023 | 0.38200469 |
| cg07768107  | RHOH     | 4  | 0.00703549 | 0.63781931 | 0.69302401 | 0.49863043 |
| cg16086237  | RIMBP2   | 12 | 0.0019386  | 0.50629359 | 0.49390028 | 0.38355626 |
| cg23373401  | RIMBP2   | 12 | 0.00401824 | 0.60102089 | 0.61575093 | 0.48883603 |
| cg05939560  | RIMBP2   | 12 | 0.00186404 | 0.49087814 | 0.50381834 | 0.35289737 |
| cg00009196  | RIN2     | 20 | 0.00386127 | 0.52145108 | 0.58243365 | 0.35711374 |
| cg02902617  | RIN3     | 14 | 0.00429038 | 0.87304626 | 0.86959272 | 0.75390197 |
| ch.14.14889 | RIN3     | 14 | 0.04006803 | 0.42301545 | 0.44905051 | 0.31201634 |
| cg10197238  | RNASE1;R | 14 | 0.00575836 | 0.60169267 | 0.65803701 | 0.48976187 |
| cg12940993  | RNASE1;R | 14 | 0.00272772 | 0.499697   | 0.53375849 | 0.35898835 |
| cg18294707  | RNASE2   | 14 | 0.00553815 | 0.40275044 | 0.41315459 | 0.26959761 |
| cg07525077  | RNASE3   | 14 | 0.03954748 | 0.74588418 | 0.74882568 | 0.61217724 |
| cg00502926  | RNASE7   | 14 | 0.03547817 | 0.33974243 | 0.33791231 | 0.20799762 |
| cg01715025  | RNF115   | 1  | 0.00806395 | 0.73263114 | 0.6661746  | 0.55795443 |
| cg03191504  | RNF149   | 2  | 0.00134295 | 0.83768754 | 0.73088863 | 0.6229763  |
| cg06418113  | RNF165   | 18 | 0.0172362  | 0.58540332 | 0.57724419 | 0.42127233 |
| cg06788514  | RNF166   | 16 | 0.01571591 | 0.54399805 | 0.5235326  | 0.42040203 |
| cg16789707  | RNF166   | 16 | 0.00857641 | 0.44270174 | 0.45163372 | 0.31152734 |
| cg23146741  | RNF170;R | 8  | 0.01771787 | 0.84940358 | 0.85662292 | 0.72938319 |
| cg24820936  | RNF19A;R | 8  | 0.00367963 | 0.56482657 | 0.58066006 | 0.37712825 |
| cg11519930  | RNF220   | 1  | 0.03349395 | 0.54775431 | 0.54952838 | 0.43269239 |
| cg01942845  | RNU5E;R  | 5  | 0.01021897 | 0.27146518 | 0.31843832 | 0.15825063 |
| cg03577157  | RNU5E;SS | 5  | 0.01632034 | 0.49875899 | 0.42499405 | 0.29617173 |
| cg03572680  | ROBO4    | 11 | 0.00230614 | 0.58577677 | 0.49921336 | 0.39826331 |
| cg07906432  | ROR1;ROI | 1  | 0.00894518 | 0.72758002 | 0.70199711 | 0.59661297 |
| cg14244439  | ROR2     | 9  | 0.00415941 | 0.80020667 | 0.817619   | 0.65494878 |
| cg01400040  | RORA     | 15 | 0.00947108 | 0.90829537 | 0.87212582 | 0.77098815 |
| cg18216249  | RPAP3;RP | 12 | 0.00853767 | 0.39993191 | 0.48497459 | 0.2990903  |
| cg20491963  | RPL31P11 | 1  | 0.00997311 | 0.73645744 | 0.75588953 | 0.63084832 |
| cg13271206  | RPS3     | 11 | 0.00805596 | 0.88771359 | 0.87929992 | 0.77031823 |
| cg16490823  | RPS6KA2  | 6  | 0.00298225 | 0.23864256 | 0.24073924 | 0.13699967 |
| cg03849851  | RPS6KA2; | 6  | 0.00065949 | 0.85439538 | 0.75890855 | 0.60148837 |

|            |          |    |            |            |            |            |
|------------|----------|----|------------|------------|------------|------------|
| cg23002590 | RPS6KA2; | 6  | 0.00830789 | 0.60637925 | 0.66386871 | 0.41191311 |
| cg24667756 | RPTOR;RF | 17 | 0.00209538 | 0.69003222 | 0.62874493 | 0.48081985 |
| cg22335826 | RREB1;RR | 6  | 0.001879   | 0.4676709  | 0.45347094 | 0.29308877 |
| cg26932790 | RRN3P1   | 16 | 0.00065949 | 0.4627941  | 0.32875347 | 0.21833948 |
| cg12132508 | RRP15    | 1  | 0.00070285 | 0.75201602 | 0.67106687 | 0.48260915 |
| cg10959651 | RSAD2    | 2  | 0.0301561  | 0.55063598 | 0.59010153 | 0.44671457 |
| cg24249648 | RSPH3    | 6  | 0.00065949 | 0.87701059 | 0.77183796 | 0.56880077 |
| cg05879505 | RTN4RL1  | 17 | 0.02047468 | 0.47899501 | 0.54248399 | 0.35987704 |
| cg15091747 | RUNX1    | 21 | 0.00157573 | 0.63110807 | 0.55411876 | 0.3789232  |
| cg05973398 | RUNX1    | 21 | 0.01678444 | 0.49586371 | 0.43465596 | 0.31265253 |
| cg19836199 | RUNX1    | 21 | 0.0037395  | 0.59761127 | 0.63725166 | 0.37510255 |
| cg08443845 | RUNX1    | 21 | 0.00260306 | 0.56523266 | 0.48684445 | 0.31684499 |
| cg01519261 | RUNX1;Rl | 21 | 0.00156239 | 0.69162447 | 0.60631068 | 0.37018977 |
| cg04915566 | RUNX1;Rl | 21 | 0.00127437 | 0.71818363 | 0.61043267 | 0.30000007 |
| cg13030790 | RUNX1;Rl | 21 | 0.00081789 | 0.35121355 | 0.23945248 | 0.10613821 |
| cg04554131 | RUNX3    | 1  | 0.03853559 | 0.613131   | 0.66835719 | 0.46759167 |
| cg09993145 | RUNX3    | 1  | 0.00113883 | 0.77542805 | 0.78673372 | 0.6321794  |
| cg13461622 | RUNX3;Rl | 1  | 0.0067146  | 0.81815956 | 0.80763628 | 0.70290044 |
| cg14236758 | RXRA     | 9  | 0.02196399 | 0.69968195 | 0.78467551 | 0.5301501  |
| cg10774802 | RYR1;RYR | 19 | 0.00872502 | 0.68251824 | 0.73740201 | 0.56807383 |
| cg03181524 | RYR1;RYR | 19 | 0.02332665 | 0.70980271 | 0.72571869 | 0.54602877 |
| cg01411912 | S100A4;S | 1  | 0.00091908 | 0.72109898 | 0.63224482 | 0.50156555 |
| cg24691453 | S100A4;S | 1  | 0.00132036 | 0.42855654 | 0.37573269 | 0.18792233 |
| cg13091627 | S100A4;S | 1  | 0.00186737 | 0.57045957 | 0.53716261 | 0.33563628 |
| cg21217846 | S100A5   | 1  | 0.00079224 | 0.85181444 | 0.76415087 | 0.60684673 |
| cg26303281 | S100A5   | 1  | 0.00147518 | 0.4087255  | 0.35684232 | 0.23938775 |
| cg03514239 | S100A9   | 1  | 0.02800741 | 0.58989628 | 0.63046347 | 0.48531259 |
| cg14742715 | SAA1;SAA | 11 | 0.01465773 | 0.48444297 | 0.54969414 | 0.35374768 |
| cg15484375 | SAA1;SAA | 11 | 0.00176161 | 0.53115695 | 0.52904678 | 0.29000213 |
| cg12907644 | SAA2;SAA | 11 | 0.00328917 | 0.60888528 | 0.63063369 | 0.43380092 |
| cg09314984 | SAFB     | 19 | 0.0301561  | 0.33918168 | 0.36064742 | 0.23616971 |
| cg02507889 | SALL3    | 18 | 0.01111549 | 0.73966856 | 0.77259103 | 0.61081362 |
| cg17018082 | SAMD12;S | 8  | 0.00639169 | 0.74200126 | 0.70420814 | 0.58512242 |
| cg20466954 | SAMD13;S | 1  | 0.00619019 | 0.24941762 | 0.29258506 | 0.14891021 |
| cg16554153 | SAMD9    | 7  | 0.02856411 | 0.59999027 | 0.54081353 | 0.35968802 |
| cg08986767 | SAMD9;S  | 7  | 0.00313278 | 0.33556313 | 0.37493457 | 0.17208537 |
| cg04554576 | SATB2    | 2  | 0.02657818 | 0.62986468 | 0.62973838 | 0.48462075 |
| cg06876053 | SBF2     | 11 | 0.00748334 | 0.48556463 | 0.47543338 | 0.21662212 |
| cg14068721 | SBK2     | 19 | 0.01561142 | 0.65067477 | 0.66655964 | 0.51648197 |
| cg17297634 | SCARA5   | 8  | 0.00216509 | 0.46945497 | 0.45378874 | 0.34491428 |
| cg03349134 | SCGN     | 6  | 0.002776   | 0.41089384 | 0.44404074 | 0.24179459 |
| cg18751231 | SCHIP1   | 3  | 0.01670995 | 0.71656906 | 0.72140925 | 0.59749924 |
| cg20314918 | SCN2A;SC | 2  | 0.00185385 | 0.71555628 | 0.72042976 | 0.59322902 |
| cg09680149 | SCNN1A   | 12 | 0.00085355 | 0.42952477 | 0.37573315 | 0.23061545 |
| cg20366549 | SCNN1A;S | 12 | 0.03160477 | 0.5060367  | 0.52337455 | 0.37031766 |
| cg03033182 | SCOC     | 4  | 0.00136593 | 0.58509994 | 0.48009606 | 0.33175352 |

|            |           |    |            |            |            |            |
|------------|-----------|----|------------|------------|------------|------------|
| cg05648303 | SCOC;SCC  | 4  | 0.00314361 | 0.64763316 | 0.63302004 | 0.44965877 |
| cg11183307 | SCRT2     | 20 | 0.01687995 | 0.59053701 | 0.68567497 | 0.44349042 |
| cg26736232 | SCT       | 11 | 0.00614688 | 0.7896703  | 0.77545673 | 0.58200977 |
| cg10944063 | SCTR      | 2  | 0.01672645 | 0.59466313 | 0.61279858 | 0.48572407 |
| cg01530803 | SDC4P     | 22 | 0.00669348 | 0.75938012 | 0.73220801 | 0.60168352 |
| cg06968788 | SDC4P     | 22 | 0.00065949 | 0.81321299 | 0.74011525 | 0.62351503 |
| cg00295780 | SDCCAG8   | 1  | 0.01164121 | 0.60609337 | 0.53847826 | 0.42531943 |
| cg11859398 | SDK1      | 7  | 0.04627729 | 0.65137616 | 0.63831184 | 0.5066845  |
| cg27005946 | SDK1      | 7  | 0.00907575 | 0.42297128 | 0.4900743  | 0.31944018 |
| cg17756105 | SDK1      | 7  | 0.00674191 | 0.38226623 | 0.3604258  | 0.24775939 |
| cg16250868 | SDK1      | 7  | 0.00362881 | 0.50784031 | 0.44059997 | 0.26770489 |
| cg25274735 | SDK1      | 7  | 0.00313278 | 0.6329878  | 0.63405727 | 0.50941921 |
| cg04004830 | SDPR      | 2  | 0.04671332 | 0.66550005 | 0.70678101 | 0.55630166 |
| cg16790374 | SDR16C5   | 8  | 0.0012838  | 0.65890082 | 0.68391613 | 0.55247793 |
| cg05149586 | SDSL      | 12 | 0.00422127 | 0.35182524 | 0.37129099 | 0.20365503 |
| cg25750901 | SEC14L3   | 22 | 0.00486472 | 0.39258641 | 0.40843633 | 0.28282788 |
| cg13855364 | SEC16A    | 9  | 0.00144767 | 0.88602668 | 0.88046063 | 0.7455955  |
| cg16640599 | SEC24D    | 4  | 0.00457113 | 0.7995553  | 0.761428   | 0.58823763 |
| cg09043518 | SECTM1    | 17 | 0.01088059 | 0.78354351 | 0.77033226 | 0.62261039 |
| cg09461545 | SEL1L3    | 4  | 0.00648443 | 0.53669399 | 0.51422404 | 0.3950791  |
| cg19853494 | SELL      | 1  | 0.01446542 | 0.4623828  | 0.51185531 | 0.31592168 |
| cg25165932 | SELPLG    | 12 | 0.00648443 | 0.40260068 | 0.42721367 | 0.26009142 |
| cg22328644 | SELPLG    | 12 | 0.01905936 | 0.6608504  | 0.6988497  | 0.55890764 |
| cg01477253 | SEMA4F    | 2  | 0.00073118 | 0.9083583  | 0.84642634 | 0.71772942 |
| cg17679604 | SEMA6A    | 5  | 0.00279494 | 0.43136254 | 0.36808209 | 0.18199231 |
| cg20015689 | SEMG1     | 20 | 0.03699135 | 0.61156859 | 0.62032134 | 0.50189239 |
| cg05474605 | SEPP1;SEI | 5  | 0.00160273 | 0.4407861  | 0.4175165  | 0.19200226 |
| cg00934987 | SEPT4;SEI | 17 | 0.00219764 | 0.52282545 | 0.53392299 | 0.32484368 |
| cg14773822 | SEPT9;SEI | 17 | 0.00935236 | 0.65281584 | 0.53709971 | 0.43009693 |
| cg16293484 | SEPT9;SEI | 17 | 0.01714791 | 0.57563708 | 0.53604115 | 0.42299814 |
| cg22056755 | SERAC1    | 6  | 0.00487618 | 0.80257316 | 0.82568485 | 0.693117   |
| cg18939081 | SERINC2   | 1  | 0.00228407 | 0.75809842 | 0.71993455 | 0.61960624 |
| cg13357229 | SFRP2     | 4  | 0.03349395 | 0.50631591 | 0.49609611 | 0.33109484 |
| cg00705808 | SFRP2     | 4  | 0.02633873 | 0.37228393 | 0.41421781 | 0.26170124 |
| cg21630608 | SFRP2     | 4  | 0.01807343 | 0.51517049 | 0.60622846 | 0.40603077 |
| cg04959480 | SFRP2     | 4  | 0.00548311 | 0.73068518 | 0.78037268 | 0.62337112 |
| cg20054157 | SFTA1P    | 10 | 0.01806244 | 0.50027218 | 0.38121696 | 0.2770363  |
| cg20393620 | SGK1      | 6  | 0.00798815 | 0.26597787 | 0.28193169 | 0.14399573 |
| cg04905719 | SGK1      | 6  | 0.00225589 | 0.51608756 | 0.51721265 | 0.26646988 |
| cg09404376 | SGK1;SGK  | 6  | 0.00144352 | 0.45395661 | 0.43087992 | 0.23483101 |
| cg02904344 | SGK1;SGK  | 6  | 0.00242331 | 0.74840429 | 0.74560651 | 0.5168093  |
| cg26501657 | SH2B3     | 12 | 0.00277425 | 0.75301534 | 0.74333716 | 0.61648861 |
| cg27003165 | SH2D1B    | 1  | 0.00141191 | 0.47258097 | 0.48138354 | 0.34089361 |
| cg20839149 | SH2D2A;M  | 1  | 0.00112849 | 0.23827607 | 0.23095343 | 0.10282656 |
| cg06888746 | SH3PXD2,  | 10 | 0.00195549 | 0.7368909  | 0.67880874 | 0.41207983 |
| cg23786152 | SH3PXD2,  | 10 | 0.00099363 | 0.69636915 | 0.58216092 | 0.4533611  |

|            |           |    |            |            |            |            |
|------------|-----------|----|------------|------------|------------|------------|
| cg16572224 | SH3PXD2I  | 5  | 0.00094183 | 0.80142739 | 0.7554539  | 0.59848181 |
| cg19027424 | SH3PXD2I  | 5  | 0.01310065 | 0.77088759 | 0.79674911 | 0.59075392 |
| cg18135683 | SH3PXD2I  | 5  | 0.00263954 | 0.65465406 | 0.61159831 | 0.4658646  |
| cg09178384 | SH3RF1    | 4  | 0.00291542 | 0.46127065 | 0.47532004 | 0.32705717 |
| cg16635948 | SH3RF3    | 2  | 0.0086408  | 0.79523843 | 0.78036443 | 0.5984554  |
| cg26645082 | SHANK2    | 11 | 0.00218063 | 0.56706169 | 0.56669912 | 0.27510696 |
| cg04404381 | SHANK2    | 11 | 0.00347082 | 0.54864003 | 0.56617581 | 0.33604958 |
| cg13813366 | SHISA3    | 4  | 0.01980843 | 0.82730361 | 0.84606935 | 0.6811133  |
| cg07631533 | SHISA9    | 16 | 0.00864149 | 0.61002114 | 0.61969652 | 0.50233043 |
| cg03222834 | SHISA9    | 16 | 0.00435264 | 0.72330368 | 0.70960211 | 0.58245032 |
| cg19162496 | SHROOM:   | 4  | 0.00521564 | 0.6138162  | 0.62079909 | 0.46764061 |
| cg20311846 | SHROOM:   | 4  | 0.00283173 | 0.32354753 | 0.35660471 | 0.15723192 |
| cg11615509 | SHROOM:   | 4  | 0.00228407 | 0.5619556  | 0.51550337 | 0.3620977  |
| cg04503593 | SHROOM:   | 4  | 0.00101054 | 0.83458016 | 0.79431235 | 0.65623606 |
| cg04461123 | SHROOM:   | 4  | 0.01160447 | 0.8490456  | 0.85170178 | 0.69719281 |
| cg27417997 | SHROOM:   | 4  | 0.00228672 | 0.54862728 | 0.51130441 | 0.36676136 |
| cg27086014 | SIGLEC12  | 19 | 0.01356792 | 0.61273092 | 0.68689691 | 0.50552232 |
| cg08861404 | SIGLECP3  | 19 | 0.00445086 | 0.45597947 | 0.46918963 | 0.3347476  |
| cg21982437 | SIGLECP3  | 19 | 0.00375204 | 0.35011367 | 0.38231686 | 0.21989461 |
| cg17610755 | SIK1      | 21 | 0.0009078  | 0.35165642 | 0.33029814 | 0.19310659 |
| cg09458566 | SIK3      | 11 | 0.0135118  | 0.67668729 | 0.65164669 | 0.52097925 |
| cg00407329 | SIM1      | 6  | 0.04685951 | 0.42058552 | 0.40244864 | 0.29767902 |
| cg06246999 | SIM1      | 6  | 0.00768774 | 0.38448957 | 0.43222692 | 0.27212079 |
| cg27248980 | SIM2;SIM  | 21 | 0.02362077 | 0.60997445 | 0.60774554 | 0.41164295 |
| cg22711869 | SIM2;SIM  | 21 | 0.03889955 | 0.77637821 | 0.82888298 | 0.6685555  |
| cg22289831 | SIM2;SIM  | 21 | 0.02888438 | 0.58533878 | 0.61773028 | 0.4514566  |
| cg21697851 | SIM2;SIM  | 21 | 0.01465218 | 0.69645254 | 0.71789542 | 0.59592804 |
| cg08066129 | SIM2;SIM  | 21 | 0.00277351 | 0.60033157 | 0.69011516 | 0.4112218  |
| cg19498960 | SIM2;SIM  | 21 | 0.00238358 | 0.51385432 | 0.59564682 | 0.30329659 |
| cg07615087 | SIM2;SIM  | 21 | 0.00418817 | 0.70926305 | 0.76748049 | 0.44667345 |
| cg10456990 | SIM2;SIM  | 21 | 0.00359124 | 0.66608292 | 0.69045185 | 0.35565513 |
| cg02701080 | SIM2;SIM  | 21 | 0.03753328 | 0.68575742 | 0.71021421 | 0.50978077 |
| cg00698204 | SIM2;SIM  | 21 | 0.00542585 | 0.67175405 | 0.80419954 | 0.44522877 |
| cg15750546 | SIM2;SIM  | 21 | 0.02041679 | 0.70145276 | 0.69109091 | 0.48166372 |
| cg01090834 | SIM2;SIM  | 21 | 0.02511511 | 0.70935043 | 0.75910221 | 0.57162643 |
| cg11803771 | SIPA1;SIP | 11 | 0.03173228 | 0.76735903 | 0.77930095 | 0.60458263 |
| cg04466898 | SIPA1;SIP | 11 | 0.036552   | 0.68355896 | 0.73294368 | 0.54707032 |
| cg24757937 | SIX1      | 14 | 0.01863458 | 0.74740353 | 0.7547448  | 0.60046364 |
| cg10397765 | SIX1      | 14 | 0.03148743 | 0.4253611  | 0.41927213 | 0.25520409 |
| cg23209353 | SKA3;SKA  | 13 | 0.04237386 | 0.91011158 | 0.8625557  | 0.73710308 |
| cg26017930 | SKI       | 1  | 0.01782206 | 0.45043153 | 0.46429833 | 0.34690323 |
| cg22845912 | SLA;TG;SL | 8  | 0.00102765 | 0.71891146 | 0.62163003 | 0.51870701 |
| cg03841065 | SLA2;SLA: | 20 | 0.00615082 | 0.49249582 | 0.53920805 | 0.39244048 |
| cg07598052 | SLA2;SLA: | 20 | 0.00659076 | 0.52078154 | 0.55144778 | 0.39817179 |
| cg08495185 | SLA2;SLA: | 20 | 0.00591291 | 0.31042689 | 0.31792818 | 0.18729962 |
| cg01710351 | SLAMF1    | 1  | 0.03068939 | 0.72898304 | 0.77009274 | 0.62153484 |



|            |           |    |            |            |            |            |
|------------|-----------|----|------------|------------|------------|------------|
| cg04275881 | SLAMF8    | 1  | 0.0018139  | 0.46113816 | 0.44466393 | 0.24885989 |
| cg07625783 | SLAMF8;S  | 1  | 0.0013706  | 0.59800567 | 0.53219521 | 0.31948103 |
| cg21301505 | SLAMF8;S  | 1  | 0.0025513  | 0.62889716 | 0.56918428 | 0.42316176 |
| cg06764092 | SLAMF8;S  | 1  | 0.00134295 | 0.6378973  | 0.62889169 | 0.42599933 |
| cg26417912 | SLAMF9;S  | 1  | 0.00079512 | 0.74607018 | 0.67847587 | 0.57521387 |
| cg11742202 | SLC17A5   | 6  | 0.00197538 | 0.51033625 | 0.60621972 | 0.38827015 |
| cg13844463 | SLC1A2    | 11 | 0.01585898 | 0.597148   | 0.54443583 | 0.44039959 |
| cg08258650 | SLC1A2    | 11 | 0.03174292 | 0.64111156 | 0.64916896 | 0.44711387 |
| cg07254421 | SLC1A3;SI | 5  | 0.00660273 | 0.60215533 | 0.49976598 | 0.34697808 |
| cg01823958 | SLC1A7    | 1  | 0.02445578 | 0.55471824 | 0.5237467  | 0.3744105  |
| cg00532936 | SLC1A7    | 1  | 0.0013661  | 0.68765105 | 0.64559988 | 0.48502673 |
| cg18105725 | SLC22A1;S | 6  | 0.01678972 | 0.55833255 | 0.6026825  | 0.42641038 |
| cg18458509 | SLC22A18  | 11 | 0.00413669 | 0.56672656 | 0.54944582 | 0.35576658 |
| cg23190089 | SLC22A18  | 11 | 0.00521564 | 0.26886311 | 0.25547738 | 0.14940776 |
| cg19040266 | SLC22A5   | 5  | 0.00688172 | 0.44725281 | 0.39631834 | 0.29501912 |
| cg16146033 | SLC22A8   | 11 | 0.00820507 | 0.28329592 | 0.31565696 | 0.18300128 |
| cg19811934 | SLC24A4;S | 14 | 0.00126059 | 0.62582287 | 0.6095859  | 0.38565627 |
| cg11107966 | SLC24A4;S | 14 | 0.00755255 | 0.43316034 | 0.43684691 | 0.25165271 |
| cg23558213 | SLC25A17  | 22 | 0.00855208 | 0.36613283 | 0.34454674 | 0.22018241 |
| cg11088051 | SLC25A3;S | 12 | 0.0214306  | 0.44004646 | 0.50127727 | 0.33901673 |
| cg07659624 | SLC25A37  | 8  | 0.00065949 | 0.78280352 | 0.68366521 | 0.55077667 |
| cg14646244 | SLC26A4;S | 7  | 0.00233544 | 0.8229487  | 0.72276333 | 0.59364883 |
| cg05028948 | SLC27A2;S | 15 | 0.00320053 | 0.79735233 | 0.80633666 | 0.66838759 |
| cg17217665 | SLC29A1;S | 6  | 0.00175545 | 0.42170667 | 0.50494085 | 0.26151216 |
| cg25602242 | SLC2A5    | 1  | 0.00898993 | 0.7122506  | 0.7227426  | 0.57503833 |
| cg13410614 | SLC2A6;SI | 9  | 0.04024645 | 0.82752148 | 0.87751852 | 0.70915295 |
| cg25788793 | SLC2A9    | 4  | 0.00912728 | 0.36601757 | 0.38411951 | 0.24354358 |
| cg03048902 | SLC35D3   | 6  | 0.01768314 | 0.69437859 | 0.67156339 | 0.54445314 |
| cg27391816 | SLC35E2   | 1  | 0.02393802 | 0.61684296 | 0.60098315 | 0.4395543  |
| cg25067702 | SLC39A11  | 17 | 0.00805596 | 0.37351554 | 0.38461918 | 0.243144   |
| cg11761483 | SLC39A11  | 17 | 0.04013158 | 0.57740106 | 0.63931915 | 0.46567616 |
| cg04204452 | SLC43A2   | 17 | 0.01891899 | 0.69050649 | 0.76451085 | 0.52860385 |
| cg06121226 | SLC4A4;SI | 4  | 0.00209789 | 0.59237443 | 0.5971757  | 0.35781396 |
| cg01629545 | SLC6A18   | 5  | 0.02096691 | 0.65971358 | 0.66727532 | 0.55065501 |
| cg07010687 | SLC6A19   | 5  | 0.00218837 | 0.75152994 | 0.71179095 | 0.61170355 |
| cg24756227 | SLC6A3    | 5  | 0.00279686 | 0.33560559 | 0.35274916 | 0.21003075 |
| cg15155209 | SLC6A6;SI | 3  | 0.00073265 | 0.61181284 | 0.46226054 | 0.30710111 |
| cg10586672 | SLC6A6;SI | 3  | 0.00100759 | 0.79087957 | 0.72465616 | 0.58500384 |
| cg15454698 | SLC6A6;SI | 3  | 0.00315265 | 0.57768802 | 0.56327817 | 0.32091683 |
| cg03987842 | SLC7A6;SI | 16 | 0.00092849 | 0.75938835 | 0.58707707 | 0.46462654 |
| cg19015847 | SLC8A1;SI | 2  | 0.0012504  | 0.840105   | 0.77528543 | 0.64070182 |
| cg08780166 | SLC8A1;SI | 2  | 0.00065949 | 0.52016267 | 0.40716976 | 0.30426794 |
| cg13408795 | SLC9A9    | 3  | 0.00438997 | 0.72849726 | 0.6846996  | 0.50037244 |
| cg22260869 | SLCO3A1;  | 15 | 0.0067125  | 0.68099026 | 0.7678637  | 0.54418408 |
| cg02107844 | SLCO3A1;  | 15 | 0.00379918 | 0.50715534 | 0.50726361 | 0.26472884 |
| cg27132471 | SLCO3A1;  | 15 | 0.00073547 | 0.2921373  | 0.21099356 | 0.09120508 |

|            |          |    |            |            |            |            |
|------------|----------|----|------------|------------|------------|------------|
| cg23480341 | SLPI     | 20 | 0.00317466 | 0.29261604 | 0.2412063  | 0.12273999 |
| cg12966875 | SLPI     | 20 | 0.00211366 | 0.58366214 | 0.57308537 | 0.30977275 |
| cg25594736 | SMAD3    | 15 | 0.00822746 | 0.59034315 | 0.60396935 | 0.43469672 |
| cg10017293 | SMAGP;D  | 12 | 0.01890283 | 0.66334342 | 0.67030203 | 0.51251788 |
| cg26061357 | SMARCD3  | 7  | 0.00606409 | 0.73406361 | 0.72709396 | 0.53422196 |
| cg13783238 | SMC4;MII | 3  | 0.04676265 | 0.65568382 | 0.62315863 | 0.52024576 |
| cg02858512 | SMG6;SM  | 17 | 0.00210972 | 0.70738625 | 0.69280451 | 0.48094536 |
| cg15816464 | SMG6;SM  | 17 | 0.02521286 | 0.57099593 | 0.58169009 | 0.45722862 |
| cg07058377 | SMG6;SM  | 17 | 0.00931986 | 0.44221044 | 0.43712146 | 0.28802174 |
| cg23403980 | SMG6;SM  | 17 | 0.00755255 | 0.53766572 | 0.53827183 | 0.33302578 |
| cg26927232 | SMG6;SM  | 17 | 0.00113577 | 0.89568892 | 0.85527351 | 0.74461287 |
| cg05509228 | SMOC2;SI | 6  | 0.0284419  | 0.46795515 | 0.64627985 | 0.26615799 |
| cg25025181 | SMYD3;SI | 1  | 0.01137235 | 0.83340137 | 0.86010824 | 0.70016201 |
| cg01966878 | SNCA;SNC | 4  | 0.0286529  | 0.53478032 | 0.58901995 | 0.41660769 |
| cg11308170 | SNORA1;S | 11 | 0.02146686 | 0.68777601 | 0.72710272 | 0.56412975 |
| cg16490124 | SNORA14  | 1  | 0.00986941 | 0.15555893 | 0.21989254 | 0.03831878 |
| cg04195863 | SNRPN;SN | 15 | 0.02541872 | 0.76536647 | 0.74519681 | 0.64259386 |
| cg22208536 | SNX25    | 4  | 0.00336153 | 0.51285116 | 0.44142695 | 0.27928617 |
| cg20465954 | SOAT2    | 12 | 0.01113996 | 0.49834552 | 0.54598583 | 0.38243546 |
| cg27312979 | SORBS1;S | 10 | 0.00280849 | 0.81667838 | 0.81611149 | 0.67337541 |
| cg20365580 | SORBS3   | 8  | 0.00152405 | 0.71200715 | 0.71429928 | 0.60897285 |
| cg22357679 | SORCS2   | 4  | 0.01580869 | 0.4827201  | 0.50729918 | 0.37516514 |
| cg05573434 | SORCS2   | 4  | 0.03157474 | 0.64059059 | 0.65106062 | 0.52092379 |
| cg00387964 | SORCS2   | 4  | 0.00588728 | 0.79457956 | 0.78200532 | 0.54785231 |
| cg14239983 | SORL1    | 11 | 0.00090291 | 0.37152759 | 0.30951198 | 0.19817909 |
| cg05075579 | SORL1    | 11 | 0.00097337 | 0.77644257 | 0.74368813 | 0.5379294  |
| cg17510957 | SORL1    | 11 | 0.00216103 | 0.78522987 | 0.73258811 | 0.54160087 |
| cg11287987 | SOST     | 17 | 0.00131453 | 0.36906848 | 0.33636432 | 0.22118029 |
| cg10825530 | SOX6;SOX | 11 | 0.0080564  | 0.79203428 | 0.78006859 | 0.64185614 |
| cg11606261 | SP1;SP1  | 12 | 0.00323074 | 0.63780847 | 0.5921547  | 0.38335041 |
| cg24044052 | SP140L   | 2  | 0.01317683 | 0.43134902 | 0.44524431 | 0.3191189  |
| cg25095994 | SP140L   | 2  | 0.00392454 | 0.4006901  | 0.4397168  | 0.24472706 |
| cg13278004 | SP140L   | 2  | 0.00330705 | 0.26055929 | 0.24193387 | 0.12297408 |
| cg08974244 | SP6      | 17 | 0.0118868  | 0.42715797 | 0.46625941 | 0.27278164 |
| cg05730975 | SPAG16   | 2  | 0.00074016 | 0.62123027 | 0.54113224 | 0.37862936 |
| cg16760223 | SPATA16  | 3  | 0.01891899 | 0.6273852  | 0.59757116 | 0.45131702 |
| cg14669524 | SPATS1   | 6  | 0.03571113 | 0.5441202  | 0.51514315 | 0.383042   |
| cg14774117 | SPATS1   | 6  | 0.00931986 | 0.52877075 | 0.5114148  | 0.28187058 |
| cg06712013 | SPATS2   | 12 | 0.0122594  | 0.65897137 | 0.71409148 | 0.50751485 |
| cg03394909 | SPEG     | 2  | 0.00065949 | 0.67442069 | 0.57008234 | 0.42212923 |
| cg23101680 | SPERT    | 13 | 0.00705117 | 0.62850467 | 0.61801778 | 0.43261154 |
| cg20734569 | SPINK8   | 3  | 0.01206219 | 0.34691493 | 0.38645825 | 0.23649134 |
| cg07856138 | SPN;SPN  | 16 | 0.04243997 | 0.5444355  | 0.55395893 | 0.44139342 |
| cg23083984 | SPN;SPN  | 16 | 0.03630626 | 0.47306372 | 0.49233597 | 0.36458471 |
| cg06101324 | SPRR1A   | 1  | 0.00181386 | 0.39089596 | 0.43557287 | 0.24406838 |
| cg00891995 | SPRR2C   | 1  | 0.01631013 | 0.49246852 | 0.47525896 | 0.3449643  |

|            |           |    |            |            |            |            |
|------------|-----------|----|------------|------------|------------|------------|
| cg02713162 | SPRY4;SPI | 5  | 0.00540086 | 0.5973982  | 0.64783736 | 0.40055966 |
| cg07200877 | SPRYD5    | 11 | 0.00112679 | 0.42292055 | 0.3945553  | 0.28932505 |
| cg11622008 | SPSB4     | 3  | 0.02817065 | 0.61013688 | 0.61961811 | 0.43820334 |
| cg22730004 | SPTA1     | 1  | 0.02435054 | 0.63975587 | 0.68636285 | 0.50237271 |
| cg24544082 | SPTBN1    | 2  | 0.00853827 | 0.83884067 | 0.83363864 | 0.70804181 |
| cg01626885 | SQRDL     | 15 | 0.00958999 | 0.56456559 | 0.56615422 | 0.4142074  |
| cg19701531 | SRCRB4D;  | 7  | 0.00186737 | 0.4262497  | 0.38297388 | 0.27874789 |
| cg27407935 | SREBF1;SI | 17 | 0.01318677 | 0.37478196 | 0.33948709 | 0.23570282 |
| cg16928487 | SREBF1;SI | 17 | 0.01820811 | 0.45671785 | 0.4491205  | 0.32819806 |
| cg01668352 | SRGAP1    | 12 | 0.00094119 | 0.88198287 | 0.85488851 | 0.68050651 |
| cg05733104 | SRGAP3;S  | 3  | 0.00917702 | 0.83448857 | 0.83909997 | 0.67251838 |
| cg09895325 | SRRM1     | 1  | 0.01666517 | 0.44238874 | 0.49617796 | 0.34160295 |
| cg19963589 | SSBP3;SSI | 1  | 0.02586964 | 0.6546404  | 0.71069516 | 0.4574465  |
| cg01996567 | SSPO      | 7  | 0.01771787 | 0.45351912 | 0.45660243 | 0.3136166  |
| cg24119990 | SST       | 3  | 0.02078916 | 0.68258209 | 0.67012336 | 0.56216917 |
| cg09586924 | ST14      | 11 | 0.00154265 | 0.42789364 | 0.39097547 | 0.18578017 |
| cg22110158 | ST14      | 11 | 0.00065949 | 0.7870969  | 0.67644879 | 0.47450805 |
| cg24969820 | ST3GAL6   | 3  | 0.00964959 | 0.51766704 | 0.53796666 | 0.37503163 |
| cg19019345 | ST5       | 11 | 0.00670817 | 0.74056855 | 0.72515034 | 0.61682012 |
| cg08726522 | ST5;ST5;S | 11 | 0.0020588  | 0.35218032 | 0.29421787 | 0.15089064 |
| cg23195547 | ST5;ST5;S | 11 | 0.00140062 | 0.70177241 | 0.62970406 | 0.50614729 |
| cg26550194 | ST6GALN/  | 17 | 0.01580869 | 0.6288803  | 0.63122142 | 0.51641135 |
| cg07168526 | ST7;ST7   | 7  | 0.00429569 | 0.80816634 | 0.83416842 | 0.63707594 |
| cg14871870 | ST8SIA1   | 12 | 0.00798815 | 0.67865438 | 0.70311234 | 0.52262088 |
| cg02369052 | ST8SIA2   | 15 | 0.0048909  | 0.74378549 | 0.74040457 | 0.64017577 |
| cg24112733 | STARD3N   | 7  | 0.00486472 | 0.42153391 | 0.4355557  | 0.22342346 |
| cg05487134 | STAT3;ST/ | 17 | 0.04937176 | 0.80106052 | 0.74980837 | 0.63342387 |
| cg24718015 | STAT3;ST/ | 17 | 0.00339981 | 0.65045574 | 0.64481548 | 0.38963256 |
| cg17833746 | STAT3;ST/ | 17 | 0.00280852 | 0.87825912 | 0.86093109 | 0.73550285 |
| cg16777510 | STAT5A    | 17 | 0.0012838  | 0.46491927 | 0.4642974  | 0.25647412 |
| cg25440680 | STBD1     | 4  | 0.01220473 | 0.49161619 | 0.46949226 | 0.32399809 |
| cg07719679 | STEAP4    | 7  | 0.00073265 | 0.2174215  | 0.1910768  | 0.09048181 |
| cg14143752 | STIM1     | 11 | 0.00551198 | 0.80330995 | 0.81150586 | 0.64697848 |
| cg14462124 | STK17B    | 2  | 0.00855749 | 0.78045642 | 0.83320154 | 0.58107513 |
| cg07804470 | STK24     | 13 | 0.01809124 | 0.86122357 | 0.8668913  | 0.7000018  |
| cg02767093 | STK24;STI | 13 | 0.02974791 | 0.47917385 | 0.43994989 | 0.30828692 |
| cg07496457 | STOX2     | 4  | 0.00174783 | 0.83470348 | 0.80044882 | 0.7002264  |
| cg12253931 | STX18     | 4  | 0.00290723 | 0.78767799 | 0.72951067 | 0.61849933 |
| cg01712428 | STX1A;ST/ | 7  | 0.00099274 | 0.49077751 | 0.39323922 | 0.22744375 |
| cg22472023 | SULT2A1;  | 19 | 0.00131453 | 0.36857327 | 0.32500617 | 0.22154944 |
| cg10262032 | SULT2B1;S | 19 | 0.00539451 | 0.49594265 | 0.4865406  | 0.36642344 |
| cg01946401 | SUPT3H;S  | 6  | 0.00289141 | 0.79707642 | 0.77725057 | 0.64620319 |
| cg03940484 | SV2B;SV2  | 15 | 0.00296278 | 0.35831163 | 0.39675969 | 0.21597547 |
| cg25661049 | SV2C      | 5  | 0.00812456 | 0.56847981 | 0.62262742 | 0.43016112 |
| cg00593008 | SV2C      | 5  | 0.01469567 | 0.61654449 | 0.60442423 | 0.45929918 |
| cg05814312 | SVIL;SVIL | 10 | 0.00822746 | 0.40471135 | 0.42174781 | 0.25383317 |

|            |           |    |            |            |            |            |
|------------|-----------|----|------------|------------|------------|------------|
| cg06537575 | SVOPL;SV  | 7  | 0.01948191 | 0.72043239 | 0.70605827 | 0.59109352 |
| cg09976669 | SWAP70    | 11 | 0.02763355 | 0.56620182 | 0.52809301 | 0.40408859 |
| cg03310376 | SYN2      | 3  | 0.03710592 | 0.44172831 | 0.47157923 | 0.29364072 |
| cg20476019 | SYN3;SYN  | 22 | 0.00309052 | 0.7070024  | 0.69534389 | 0.44945322 |
| cg05342835 | SYNC;SYN  | 1  | 0.01564242 | 0.69430894 | 0.70785564 | 0.54435028 |
| cg07586863 | SYNE1;SYI | 6  | 0.03369957 | 0.69563423 | 0.68196932 | 0.55442402 |
| cg14079545 | SYNGAP1   | 6  | 0.036552   | 0.6380888  | 0.67731282 | 0.4920433  |
| cg03467087 | SYNJ2     | 6  | 0.03129757 | 0.69078558 | 0.68284127 | 0.57770355 |
| cg12002139 | SYNJ2     | 6  | 0.00091059 | 0.86358144 | 0.78272595 | 0.53122493 |
| cg11569478 | SYNPO2;S  | 4  | 0.00070305 | 0.75051996 | 0.66087632 | 0.55606157 |
| cg20515580 | SYT12     | 11 | 0.00352201 | 0.38334225 | 0.35310515 | 0.20761998 |
| cg15957341 | SYT9      | 11 | 0.00554206 | 0.42240979 | 0.46481877 | 0.2843125  |
| cg21672572 | SYT9      | 11 | 0.02630407 | 0.40051714 | 0.43503613 | 0.27582006 |
| cg15731317 | SYTL2;SYT | 11 | 0.01391836 | 0.46928774 | 0.41371129 | 0.30116904 |
| cg11065271 | SYTL3     | 6  | 0.00177922 | 0.74223831 | 0.69203328 | 0.52683302 |
| cg12691330 | SYTL3     | 6  | 0.00568196 | 0.85201522 | 0.833449   | 0.69985022 |
| cg03003434 | SYTL3     | 6  | 0.00499723 | 0.8047841  | 0.83716547 | 0.58981836 |
| cg00370106 | SYTL3;SYT | 6  | 0.04178177 | 0.4946923  | 0.50391351 | 0.33527655 |
| cg10657228 | T-SP1     | 8  | 0.02377716 | 0.58223569 | 0.58275677 | 0.44627549 |
| cg14284618 | TACC1     | 8  | 0.00810401 | 0.29393015 | 0.30856592 | 0.16147864 |
| cg15217044 | TAGAP;TA  | 6  | 0.00458992 | 0.42525444 | 0.43078607 | 0.29082884 |
| cg05262335 | TAGAP;TA  | 6  | 0.02417619 | 0.51104856 | 0.5506413  | 0.37498926 |
| cg22339338 | TAGLN2    | 1  | 0.01471045 | 0.2868606  | 0.30050818 | 0.18326772 |
| cg15641364 | TAGLN2    | 1  | 0.01019308 | 0.68490841 | 0.69051672 | 0.54892306 |
| cg25709789 | TAOK1     | 17 | 0.00197403 | 0.7860293  | 0.77252302 | 0.66678475 |
| cg17626301 | TAP1      | 6  | 0.00144751 | 0.79704617 | 0.77837206 | 0.65343785 |
| cg10666909 | TAP1      | 6  | 0.01714132 | 0.55061692 | 0.5649913  | 0.42859107 |
| cg05592483 | TAP2;TAP  | 6  | 0.04622903 | 0.41952599 | 0.41768581 | 0.31518804 |
| cg24131538 | TAPBPL    | 12 | 0.01302012 | 0.5313464  | 0.54912806 | 0.3745299  |
| cg00862408 | TBC1D10C  | 11 | 0.00276502 | 0.51268604 | 0.60593631 | 0.38633736 |
| cg15437231 | TBC1D15;  | 12 | 0.00065949 | 0.63719699 | 0.53611585 | 0.40977345 |
| cg02348119 | TBC1D16   | 17 | 0.00743666 | 0.80515453 | 0.82537145 | 0.69163453 |
| cg19016694 | TBCD      | 17 | 0.002727   | 0.78141493 | 0.7124344  | 0.59153933 |
| cg03930153 | TBL1XR1   | 3  | 0.03889249 | 0.30795454 | 0.30895605 | 0.18485581 |
| cg04254487 | TBPL1     | 6  | 0.0120439  | 0.73564837 | 0.7510382  | 0.54165224 |
| cg14557487 | TBR1      | 2  | 0.00631385 | 0.40564579 | 0.48460496 | 0.29601076 |
| cg04679902 | TBX1;TBX  | 22 | 0.02729523 | 0.54601312 | 0.62059933 | 0.43022446 |
| cg11631427 | TBX2      | 17 | 0.01123326 | 0.76026378 | 0.75988619 | 0.5175277  |
| cg03753391 | TBX2      | 17 | 0.04296377 | 0.63629608 | 0.62075454 | 0.44755089 |
| cg01913455 | TBX2      | 17 | 0.02054758 | 0.400958   | 0.42433463 | 0.28135768 |
| cg10308654 | TBX2      | 17 | 0.00670817 | 0.65887072 | 0.69275133 | 0.36788353 |
| cg04794141 | TC2N      | 14 | 0.0230167  | 0.29982052 | 0.32513324 | 0.18540184 |
| cg03683087 | TCF7L2;TC | 10 | 0.00935896 | 0.32663543 | 0.25066623 | 0.13941124 |
| cg05402891 | TCL1B;TCI | 14 | 0.01485881 | 0.46606844 | 0.46259745 | 0.3370222  |
| cg03852551 | TCP10L2   | 6  | 0.00541343 | 0.33255055 | 0.29317881 | 0.18950015 |
| cg23346134 | TCTA      | 3  | 0.00346969 | 0.3615191  | 0.35833887 | 0.20193013 |

|            |           |    |            |            |            |            |
|------------|-----------|----|------------|------------|------------|------------|
| cg09861057 | TDRD10;T  | 1  | 0.00080601 | 0.56902385 | 0.46101529 | 0.3276698  |
| cg02097120 | TDRD10;T  | 1  | 0.00065949 | 0.32411244 | 0.25199214 | 0.13840913 |
| cg21198586 | TEAD1     | 11 | 0.00065949 | 0.51496178 | 0.40382865 | 0.28321464 |
| cg12399536 | TEAD1     | 11 | 0.04407901 | 0.56610757 | 0.56733266 | 0.44977359 |
| cg17249224 | TERT;TER  | 5  | 0.0249821  | 0.7124919  | 0.67511563 | 0.56914906 |
| cg06768361 | TESC;TESC | 12 | 0.00427027 | 0.816233   | 0.8157478  | 0.69918622 |
| cg00804338 | TFDP1;TFI | 13 | 0.00197986 | 0.20361828 | 0.20443832 | 0.08286429 |
| cg08053935 | TFEB;TFEI | 6  | 0.01438148 | 0.46993611 | 0.45463202 | 0.30986601 |
| cg15339605 | TFEC;TFEC | 7  | 0.00102765 | 0.47791503 | 0.46239408 | 0.16206472 |
| cg11947187 | TG        | 8  | 0.00225183 | 0.62611431 | 0.52406953 | 0.37159785 |
| cg11883141 | TG;SLA;SL | 8  | 0.00241892 | 0.70093958 | 0.63611271 | 0.47268444 |
| cg08911152 | TG;SLA;SL | 8  | 0.02614058 | 0.35054744 | 0.38893459 | 0.24478381 |
| cg15735736 | TGFB1     | 19 | 0.00211122 | 0.42149837 | 0.33992122 | 0.21707099 |
| cg09417692 | TGFBR2;T  | 3  | 0.01284723 | 0.6227593  | 0.62213058 | 0.38243734 |
| cg02061431 | TGFBR3    | 1  | 0.01390012 | 0.4998714  | 0.51832205 | 0.34080249 |
| cg00857921 | TGFBR3    | 1  | 0.00499412 | 0.60870123 | 0.55781115 | 0.41592441 |
| cg25769732 | TGFBR3    | 1  | 0.01064552 | 0.38593874 | 0.3376501  | 0.23151229 |
| cg04204669 | TH;TH;TH  | 11 | 0.00590146 | 0.70480783 | 0.70477876 | 0.59472439 |
| cg08685909 | TH1L      | 20 | 0.00252483 | 0.43551464 | 0.42153892 | 0.30103142 |
| cg23105419 | THADA;TH  | 2  | 0.00075254 | 0.89022167 | 0.82096495 | 0.5837116  |
| cg13869942 | THEM4     | 1  | 0.02995719 | 0.55141653 | 0.56508934 | 0.43911079 |
| cg11344950 | THEM5;TI  | 1  | 0.00622238 | 0.72543866 | 0.75486378 | 0.62319022 |
| cg19763108 | THRB;THF  | 3  | 0.0033048  | 0.499674   | 0.41213781 | 0.30686252 |
| cg00466492 | TIMM44;T  | 19 | 0.00183809 | 0.62983268 | 0.58197351 | 0.45949237 |
| cg14255824 | TJP2;TJP2 | 9  | 0.00105674 | 0.80454355 | 0.76846247 | 0.62219186 |
| cg02934719 | TK2       | 16 | 0.00155292 | 0.8355086  | 0.77076397 | 0.63727886 |
| cg10472651 | TK2       | 16 | 0.00523248 | 0.6073392  | 0.58645383 | 0.44057554 |
| cg13544946 | TLN1      | 9  | 0.02935375 | 0.43220598 | 0.38777683 | 0.27874582 |
| cg25840354 | TLR10;TLF | 4  | 0.00912728 | 0.39247369 | 0.38869417 | 0.22017821 |
| cg23039250 | TLR5      | 1  | 0.01771787 | 0.4857475  | 0.47975921 | 0.33766265 |
| cg01883662 | TM4SF19   | 3  | 0.00429569 | 0.69881893 | 0.70859956 | 0.57930565 |
| cg21845080 | TM4SF19   | 3  | 0.00704609 | 0.5881633  | 0.58338188 | 0.47261598 |
| cg21090033 | TM4SF19   | 3  | 0.00152405 | 0.78087641 | 0.78009496 | 0.61948916 |
| cg15044270 | TM4SF19   | 3  | 0.0037342  | 0.38632901 | 0.38711957 | 0.22686818 |
| cg13314965 | TM4SF19   | 3  | 0.0013522  | 0.79795618 | 0.7863301  | 0.60124832 |
| cg23250593 | TM4SF19   | 3  | 0.00885213 | 0.61389036 | 0.6072979  | 0.50205853 |
| cg02641539 | TM7SF4    | 8  | 0.00958999 | 0.35550192 | 0.33366656 | 0.21670978 |
| cg03190661 | TMC8;TM   | 17 | 0.02700247 | 0.67844337 | 0.63923619 | 0.4905552  |
| cg19056418 | TMC8;TM   | 17 | 0.036552   | 0.60268975 | 0.59444491 | 0.47767824 |
| cg06507678 | TMED7-TI  | 5  | 0.00598432 | 0.77417964 | 0.70931461 | 0.59884102 |
| cg05384697 | TMEM132   | 12 | 0.02072204 | 0.81086021 | 0.76794336 | 0.66362725 |
| cg21363348 | TMEM140   | 7  | 0.00119385 | 0.26379601 | 0.22366971 | 0.10869893 |
| cg09414827 | TMEM140   | 7  | 0.00160451 | 0.28097769 | 0.26095952 | 0.1103835  |
| cg27641628 | TMEM140   | 7  | 0.002727   | 0.46355135 | 0.44274448 | 0.22751652 |
| cg08016257 | TMEM140   | 7  | 0.00944446 | 0.66746675 | 0.7019125  | 0.50056343 |
| cg07522970 | TMEM140   | 7  | 0.00670577 | 0.55705427 | 0.57170611 | 0.34372667 |

|            |           |    |            |            |            |            |
|------------|-----------|----|------------|------------|------------|------------|
| cg06456031 | TMEM140   | 7  | 0.00317432 | 0.50063093 | 0.49644655 | 0.28011951 |
| cg07972322 | TMEM140   | 7  | 0.00334886 | 0.37910192 | 0.33892227 | 0.18167848 |
| cg15139596 | TMEM140   | 19 | 0.00600204 | 0.58506786 | 0.54115246 | 0.41437341 |
| cg16911583 | TMEM140   | 19 | 0.04648826 | 0.71368728 | 0.73905058 | 0.59783811 |
| cg04232128 | TMEM170   | 5  | 0.00129758 | 0.39805332 | 0.32289531 | 0.19676638 |
| cg18396403 | TMEM184   | 22 | 0.02346046 | 0.65615656 | 0.70160684 | 0.55476312 |
| cg25921357 | TMEM190   | 19 | 0.03524554 | 0.43510872 | 0.43585613 | 0.32654956 |
| cg26906737 | TMEM200   | 1  | 0.00806542 | 0.69427623 | 0.6939745  | 0.58199645 |
| cg06776976 | TMEM200   | 1  | 0.02883885 | 0.54959626 | 0.59914175 | 0.44330105 |
| cg20068209 | TMEM300   | 6  | 0.00950809 | 0.43512432 | 0.5043052  | 0.30153465 |
| cg18282388 | TMEM450   | 11 | 0.01580766 | 0.68397008 | 0.66538735 | 0.52400666 |
| cg24174557 | TMEM490   | 17 | 0.02987993 | 0.647217   | 0.65775384 | 0.50023972 |
| cg01409343 | TMEM490   | 17 | 0.00115895 | 0.60435646 | 0.50083771 | 0.37935156 |
| cg02782634 | TMEM490   | 17 | 0.00160033 | 0.54607985 | 0.45154007 | 0.31859975 |
| cg19897979 | TMEM500   | 1  | 0.00066204 | 0.87336072 | 0.78222552 | 0.64560368 |
| cg23313885 | TMEM710   | 8  | 0.00263672 | 0.47543339 | 0.40627091 | 0.3002369  |
| cg18973101 | TMEM790   | 1  | 0.00375204 | 0.29893833 | 0.27592152 | 0.17023964 |
| cg05954120 | TMEM790   | 1  | 0.01559842 | 0.61809121 | 0.59503024 | 0.46820392 |
| cg14087413 | TMEM8B0   | 9  | 0.01203452 | 0.45916811 | 0.4197203  | 0.30972833 |
| cg13736811 | TMEM910   | 19 | 0.02241786 | 0.71066898 | 0.74309096 | 0.52881151 |
| cg12955084 | TMEM910   | 19 | 0.00447146 | 0.78480866 | 0.76305718 | 0.65598918 |
| cg00488740 | TMIGD2;1  | 19 | 0.00670817 | 0.7989869  | 0.80205061 | 0.68651491 |
| cg27144670 | TMOD3     | 15 | 0.00322924 | 0.77306567 | 0.79076612 | 0.60498696 |
| cg10973881 | TMOD4     | 1  | 0.02595684 | 0.41601001 | 0.4467884  | 0.30063731 |
| cg17318719 | TMPRSS4   | 11 | 0.00368022 | 0.50816558 | 0.45056683 | 0.28444118 |
| cg21370522 | TNF       | 6  | 0.02099588 | 0.58644753 | 0.64447656 | 0.46644174 |
| cg03037030 | TNF       | 6  | 0.01078115 | 0.44363764 | 0.45566858 | 0.27477745 |
| cg01569083 | TNF       | 6  | 0.03060322 | 0.55579862 | 0.58213908 | 0.45848254 |
| cg09918674 | TNFAIP8L  | 19 | 0.03756327 | 0.36956301 | 0.38077352 | 0.26339905 |
| cg02368508 | TNFRSF17  | 16 | 0.0048797  | 0.75359403 | 0.75126033 | 0.63732333 |
| cg20820107 | TNFRSF8;7 | 1  | 0.00244246 | 0.68421816 | 0.71033865 | 0.4447524  |
| cg09247175 | TNFRSF8;7 | 1  | 0.00586773 | 0.51426213 | 0.50083461 | 0.3497939  |
| cg14153654 | TNFRSF9   | 1  | 0.00327239 | 0.5395548  | 0.46343874 | 0.3266607  |
| cg18025409 | TNFRSF9   | 1  | 0.00930715 | 0.42927346 | 0.36347854 | 0.24832433 |
| cg01462856 | TNFSF13E  | 13 | 0.00838913 | 0.35483215 | 0.40273513 | 0.20941061 |
| cg10362335 | TNFSF14;7 | 19 | 0.00868726 | 0.59154919 | 0.64762268 | 0.45266603 |
| cg26315984 | TNFSF4    | 1  | 0.02995719 | 0.62969343 | 0.69371341 | 0.50087831 |
| cg10861599 | TNFSF4    | 1  | 0.0052016  | 0.64173411 | 0.66828428 | 0.48415227 |
| cg05687083 | TNRC18    | 7  | 0.00379918 | 0.83039846 | 0.87290957 | 0.63289892 |
| cg02481714 | TNRC6B    | 22 | 0.00551242 | 0.83128542 | 0.79917991 | 0.66378182 |
| cg12338137 | TNS1      | 2  | 0.00165724 | 0.84409045 | 0.77902416 | 0.59674269 |
| cg01188191 | TNXB      | 6  | 0.01158752 | 0.74126934 | 0.75749191 | 0.60394261 |
| cg03376089 | TOM1L2;7  | 17 | 0.00065949 | 0.84803499 | 0.7793225  | 0.55719587 |
| cg13473434 | TOMM40    | 1  | 0.00134295 | 0.27472382 | 0.24503635 | 0.13435851 |
| cg21388339 | TP73;TP73 | 1  | 0.02774083 | 0.41949457 | 0.50063958 | 0.24983985 |
| cg12205230 | TPM3      | 1  | 0.01334584 | 0.53612693 | 0.59506556 | 0.42992956 |

|            |           |    |            |            |            |            |
|------------|-----------|----|------------|------------|------------|------------|
| cg09856467 | TPST2;TP  | 22 | 0.00749271 | 0.69041461 | 0.68231378 | 0.4453973  |
| cg16704530 | TRAF3IP2  | 6  | 0.00073265 | 0.83996799 | 0.76232806 | 0.6368191  |
| cg11756029 | TRAFD1;T  | 12 | 0.0065693  | 0.56211143 | 0.45191965 | 0.33656338 |
| cg22211507 | TRAT1     | 3  | 0.00694471 | 0.64279935 | 0.66613397 | 0.52303806 |
| cg21328082 | TREM1     | 6  | 0.00128725 | 0.62673138 | 0.58246141 | 0.31363494 |
| cg10981439 | TREM1;TF  | 6  | 0.0015244  | 0.70864534 | 0.69730005 | 0.40111094 |
| cg25473438 | TREML2    | 6  | 0.00855749 | 0.52914418 | 0.55346413 | 0.42896179 |
| cg05264377 | TRERF1    | 6  | 0.0007088  | 0.61190946 | 0.52727376 | 0.40764241 |
| cg09103187 | TRERF1    | 6  | 0.00073118 | 0.57782494 | 0.40456497 | 0.27087251 |
| cg16597079 | TRERF1    | 6  | 0.00628266 | 0.61654312 | 0.62617733 | 0.50001159 |
| cg09804858 | TRERF1    | 6  | 0.00796638 | 0.79561567 | 0.77710363 | 0.6256895  |
| cg15120497 | TRH       | 3  | 0.01884096 | 0.74481183 | 0.71676497 | 0.61237237 |
| cg14741870 | TRIM26    | 6  | 0.00078729 | 0.7913114  | 0.69501835 | 0.53453756 |
| cg01505556 | TRIM26    | 6  | 0.00066232 | 0.56232059 | 0.43494566 | 0.28981879 |
| cg14606478 | TRIM26    | 6  | 0.00112679 | 0.58213873 | 0.51024331 | 0.36858405 |
| cg01591152 | TRIM29    | 11 | 0.00069165 | 0.61883006 | 0.50055362 | 0.35883777 |
| cg17048834 | TRIM31    | 6  | 0.00186404 | 0.55700039 | 0.62793644 | 0.45421706 |
| cg01190484 | TRIM40;T  | 6  | 0.03956605 | 0.45670616 | 0.46889816 | 0.31540948 |
| cg06365108 | TRIM40;T  | 6  | 0.00514311 | 0.54324711 | 0.6050867  | 0.42110769 |
| cg26700215 | TRIM55;T  | 8  | 0.00403008 | 0.50590069 | 0.54654721 | 0.32259937 |
| cg22107533 | TRIM69;T  | 15 | 0.00828598 | 0.66006462 | 0.67733069 | 0.53348945 |
| cg19200592 | TRIM71    | 3  | 0.00805241 | 0.53899684 | 0.58049056 | 0.39611663 |
| cg21531038 | TRIO      | 5  | 0.00159601 | 0.79640092 | 0.77758878 | 0.62116436 |
| cg04646987 | TRIO      | 5  | 0.01531619 | 0.83019376 | 0.79057589 | 0.68794482 |
| cg11421768 | TRIP13    | 5  | 0.00070134 | 0.85759299 | 0.79652324 | 0.66552862 |
| cg17510385 | TRIP13    | 5  | 0.00097509 | 0.84138073 | 0.76964031 | 0.65656601 |
| cg17206393 | TRPC4AP;  | 20 | 0.00629918 | 0.63060547 | 0.65913934 | 0.42310297 |
| cg17406359 | TRPM2     | 21 | 0.03749859 | 0.59981789 | 0.6161993  | 0.4942459  |
| cg08191854 | TRPM2     | 21 | 0.03960534 | 0.60637818 | 0.62204552 | 0.50501964 |
| cg26719625 | TRPV2     | 17 | 0.00092387 | 0.82549481 | 0.79435924 | 0.59668989 |
| cg09093656 | TRPV2     | 17 | 0.00165724 | 0.74476011 | 0.69208902 | 0.45971677 |
| cg10122294 | TSNAX-DI  | 1  | 0.00093001 | 0.39132522 | 0.34650597 | 0.23832866 |
| cg04250837 | TSNAX-DI  | 1  | 0.01820811 | 0.69555269 | 0.70472764 | 0.58602043 |
| cg05946353 | TSPAN10   | 17 | 0.00073118 | 0.77529766 | 0.72688219 | 0.57966482 |
| cg09690632 | TSPAN10   | 17 | 0.0009934  | 0.82330709 | 0.80007663 | 0.6877979  |
| cg00509207 | TSPAN11   | 12 | 0.01561358 | 0.71738304 | 0.69202524 | 0.5878175  |
| cg01481646 | TSPAN14;  | 10 | 0.01268304 | 0.79115001 | 0.79950697 | 0.67157306 |
| cg08560387 | TSPAN14;  | 10 | 0.03452515 | 0.76658777 | 0.81076913 | 0.64302874 |
| cg24328142 | TSPAN15   | 10 | 0.00066232 | 0.83299395 | 0.77604752 | 0.58260973 |
| cg18247223 | TSPAN18   | 11 | 0.00065949 | 0.78993237 | 0.6498869  | 0.5416388  |
| cg11958128 | TSPAN9;T  | 12 | 0.01980843 | 0.65484893 | 0.73242034 | 0.47786657 |
| cg15852320 | TSPAN9;T  | 12 | 0.01476513 | 0.71222831 | 0.73315191 | 0.54113749 |
| cg14340336 | TTC25     | 17 | 0.01044398 | 0.46381934 | 0.4946332  | 0.32658976 |
| cg14766231 | TTC32     | 2  | 0.00938113 | 0.73733238 | 0.74173046 | 0.57035454 |
| cg19319037 | TTF2      | 1  | 0.00970413 | 0.57750307 | 0.53553308 | 0.39292314 |
| cg18788205 | TTPAL;TTI | 20 | 0.03060322 | 0.75946726 | 0.76452516 | 0.64449891 |

|            |          |    |            |            |            |            |
|------------|----------|----|------------|------------|------------|------------|
| cg26282283 | TTYH3    | 7  | 0.02548815 | 0.47107578 | 0.42562631 | 0.30793998 |
| cg19050555 | TUBA1C   | 12 | 0.00362629 | 0.84550544 | 0.84216413 | 0.6417141  |
| cg01108243 | TUBB1    | 20 | 0.01980843 | 0.64631995 | 0.66332944 | 0.54401648 |
| cg13756273 | TUBB1;TL | 20 | 0.00065949 | 0.87490254 | 0.79134357 | 0.64070578 |
| cg19244428 | TUBB2B   | 6  | 0.0048909  | 0.58810645 | 0.58232304 | 0.40936729 |
| cg02113368 | TUBGCP2  | 10 | 0.00132175 | 0.91737953 | 0.88687798 | 0.77486003 |
| cg01280180 | TXNDC6   | 3  | 0.01438148 | 0.72205739 | 0.69147455 | 0.56116629 |
| cg14557690 | UAP1L1   | 9  | 0.00186737 | 0.68732717 | 0.62291745 | 0.48128485 |
| cg07450210 | UBAC2;UI | 13 | 0.00708587 | 0.71435805 | 0.73647788 | 0.47515991 |
| cg05257202 | UBAC2;UI | 13 | 0.00686574 | 0.649849   | 0.63033753 | 0.39771795 |
| cg12578486 | UBAC2;UI | 13 | 0.00693355 | 0.66497415 | 0.64644138 | 0.39205801 |
| cg24058145 | UBD      | 6  | 0.01010631 | 0.79307342 | 0.82393816 | 0.69086788 |
| cg11554335 | UBE2L6   | 11 | 0.00065949 | 0.55049641 | 0.44358895 | 0.26031186 |
| cg27429749 | UBE2L6;U | 11 | 0.00561885 | 0.49611385 | 0.53306561 | 0.31102679 |
| cg04346683 | UBE2Q2;l | 15 | 0.02252087 | 0.52757989 | 0.54438347 | 0.40493354 |
| cg17295666 | UBOX5;F/ | 20 | 0.02634735 | 0.45343985 | 0.45123293 | 0.35025815 |
| cg24247482 | UBTF;UBT | 17 | 0.03437206 | 0.60771383 | 0.59406283 | 0.4751521  |
| cg10135708 | UCN2     | 3  | 0.0235449  | 0.73204319 | 0.72530992 | 0.59960935 |
| cg14699903 | UCN2     | 3  | 0.0019194  | 0.69693659 | 0.68751872 | 0.5681963  |
| cg22145666 | UGT1A10  | 2  | 0.00799281 | 0.60773906 | 0.64604954 | 0.49002454 |
| cg06635797 | UHRF1;UI | 19 | 0.00186784 | 0.35584901 | 0.32230425 | 0.17914857 |
| cg20724032 | ULK4     | 3  | 0.00151202 | 0.49597255 | 0.40036388 | 0.2775946  |
| cg02527375 | ULK4     | 3  | 0.00074036 | 0.89902362 | 0.84099228 | 0.7190831  |
| cg16413715 | UNC5A    | 5  | 0.00938113 | 0.63147734 | 0.64059329 | 0.51235638 |
| cg20434422 | UOX      | 1  | 0.00084118 | 0.84763846 | 0.80893676 | 0.64956922 |
| cg04585822 | USH1G    | 17 | 0.04667899 | 0.72183569 | 0.77187369 | 0.61439457 |
| cg23982392 | UST      | 6  | 0.00170239 | 0.7736754  | 0.70838669 | 0.59939072 |
| cg09594210 | UST      | 6  | 0.02658729 | 0.28633835 | 0.28230148 | 0.18070836 |
| cg11274172 | UVRAG    | 11 | 0.00247655 | 0.78873751 | 0.78581561 | 0.54779327 |
| cg17567602 | UXS1     | 2  | 0.02156272 | 0.79471424 | 0.75318218 | 0.63111798 |
| cg06710195 | VAV3     | 1  | 0.00092849 | 0.6243389  | 0.58799396 | 0.42213955 |
| cg25763716 | VCAM1;V  | 1  | 0.00275808 | 0.52982633 | 0.56192472 | 0.31531094 |
| cg04295372 | VCAM1;V  | 1  | 0.00552473 | 0.6781523  | 0.70675044 | 0.51691656 |
| cg14260889 | VIM      | 10 | 0.00143276 | 0.83910477 | 0.80619641 | 0.6775806  |
| cg12595461 | VIT      | 2  | 0.01158752 | 0.5017437  | 0.47797814 | 0.30420783 |
| cg00852964 | VNN1     | 6  | 0.03696736 | 0.49209597 | 0.55388558 | 0.37827816 |
| cg23654401 | VOPP1    | 7  | 0.00177922 | 0.67937962 | 0.64042781 | 0.40290375 |
| cg14844130 | VPREB1   | 22 | 0.01273892 | 0.37163155 | 0.39613847 | 0.22783988 |
| cg03763796 | VPREB1   | 22 | 0.00383289 | 0.59274919 | 0.60009622 | 0.43981868 |
| cg25330366 | VPREB1   | 22 | 0.00277567 | 0.34687652 | 0.35729096 | 0.19649333 |
| cg18441959 | VPREB1   | 22 | 0.00429038 | 0.29849869 | 0.29950878 | 0.19634324 |
| cg21689902 | VWA5A;V  | 11 | 0.00183809 | 0.55861959 | 0.50856943 | 0.29087519 |
| cg25884442 | VWF      | 12 | 0.00093631 | 0.50431226 | 0.46233769 | 0.31231066 |
| cg18898325 | WBP2NL   | 22 | 0.00720289 | 0.78700328 | 0.76390267 | 0.63279504 |
| cg00187692 | WDFY2    | 13 | 0.0019386  | 0.6113951  | 0.53070018 | 0.37479503 |
| cg20469502 | WDR25;V  | 14 | 0.00065949 | 0.90745825 | 0.82928931 | 0.72055262 |



|            |           |    |            |            |            |            |
|------------|-----------|----|------------|------------|------------|------------|
| cg09755594 | WDR63     | 1  | 0.02195382 | 0.50309595 | 0.54114987 | 0.3766673  |
| cg22822803 | WDR8      | 1  | 0.04388834 | 0.53554831 | 0.50826255 | 0.39752144 |
| cg09433910 | WDR81;W   | 17 | 0.00092661 | 0.54261686 | 0.40855839 | 0.23265122 |
| cg10080732 | WDR81;W   | 17 | 0.00104158 | 0.37446991 | 0.31517956 | 0.1680857  |
| cg11783356 | WFDC10E   | 20 | 0.04901873 | 0.61496268 | 0.61487838 | 0.51438443 |
| cg20485165 | WFDC12    | 20 | 0.00132756 | 0.64908783 | 0.65783054 | 0.54837293 |
| cg07982740 | WFDC3     | 20 | 0.00279442 | 0.74710069 | 0.69609802 | 0.5820904  |
| cg15558558 | WHAMM     | 15 | 0.00201167 | 0.47580101 | 0.42298507 | 0.28173283 |
| cg15058645 | WIPF1     | 2  | 0.00967401 | 0.57749622 | 0.59361161 | 0.37457796 |
| cg19275653 | WIPF1     | 2  | 0.00519569 | 0.53382733 | 0.55670448 | 0.36883948 |
| cg17165848 | WIPF1;WI  | 2  | 0.00478782 | 0.45783071 | 0.34352708 | 0.23834357 |
| cg27117828 | WIPF1;WI  | 2  | 0.00575178 | 0.62865028 | 0.63061813 | 0.41914975 |
| cg03983223 | WIPF1;WI  | 2  | 0.01160447 | 0.53585028 | 0.55294523 | 0.37032263 |
| cg03562120 | WISP2;WI  | 20 | 0.00177039 | 0.76562631 | 0.69687291 | 0.59143328 |
| cg04154465 | WNT2B     | 1  | 0.02122541 | 0.61777776 | 0.65370589 | 0.51662535 |
| cg15237742 | WNT3      | 17 | 0.00701189 | 0.42352098 | 0.43287588 | 0.28552086 |
| cg24114556 | WNT3      | 17 | 0.00429038 | 0.42170681 | 0.48172647 | 0.3141834  |
| cg26121234 | WNT7A     | 3  | 0.00094876 | 0.37859965 | 0.34052604 | 0.23127273 |
| cg02179982 | WNT7B     | 22 | 0.00283173 | 0.76413297 | 0.69769915 | 0.52219635 |
| cg07777652 | WRB       | 21 | 0.0113406  | 0.66369454 | 0.64386929 | 0.43756378 |
| cg24115019 | WWC1;W    | 5  | 0.00107365 | 0.52491058 | 0.4968166  | 0.35598904 |
| cg18484958 | WWTR1;W   | 3  | 0.00065949 | 0.78612313 | 0.6956307  | 0.53763693 |
| cg10353683 | XCR1;XCR  | 3  | 0.00539186 | 0.62392785 | 0.58292865 | 0.41215007 |
| cg24394891 | XPNPEP1;  | 10 | 0.0140881  | 0.72847625 | 0.70802406 | 0.56416332 |
| cg11845168 | XPO4      | 13 | 0.0040421  | 0.6145897  | 0.61473252 | 0.37632387 |
| cg26730763 | XPO6      | 16 | 0.00471011 | 0.47103032 | 0.52546361 | 0.35874395 |
| cg02889774 | XPO7;XPC  | 8  | 0.04390149 | 0.72667242 | 0.73601409 | 0.58288098 |
| cg07140459 | XRN1;XRN  | 3  | 0.00264473 | 0.51481089 | 0.47107177 | 0.30672194 |
| cg15389191 | XRRA1     | 11 | 0.00600779 | 0.78018828 | 0.76841602 | 0.64947733 |
| cg09745987 | XYLT1     | 16 | 0.00228672 | 0.36745443 | 0.37293779 | 0.20957832 |
| cg08908247 | YIF1A     | 11 | 0.01067425 | 0.57762786 | 0.61772842 | 0.46499896 |
| cg24040043 | YOD1      | 1  | 0.04006803 | 0.57248101 | 0.53515174 | 0.42044496 |
| cg19743666 | YPEL5;YPI | 2  | 0.00703549 | 0.61849022 | 0.62885778 | 0.47708857 |
| cg00004667 | ZBTB17    | 1  | 0.01653772 | 0.62957316 | 0.64108232 | 0.43318173 |
| cg03559942 | ZBTB3     | 11 | 0.01198766 | 0.43234239 | 0.485468   | 0.3307733  |
| cg09231418 | ZBTB32    | 19 | 0.04941317 | 0.52271232 | 0.48507127 | 0.38470174 |
| cg03025465 | ZBTB38    | 3  | 0.00779924 | 0.79592253 | 0.80332005 | 0.6331774  |
| cg19680850 | ZC3H12A   | 1  | 0.00344865 | 0.23264255 | 0.24492854 | 0.10511729 |
| cg00859858 | ZC3H12A   | 1  | 0.00139783 | 0.83616357 | 0.78821337 | 0.62063787 |
| cg00073460 | ZC3H12D   | 6  | 0.00168532 | 0.38243632 | 0.31380768 | 0.18408261 |
| cg06762457 | ZC3H12D   | 6  | 0.00329066 | 0.55893773 | 0.52785101 | 0.37295179 |
| cg14030904 | ZC3H12D   | 6  | 0.00522751 | 0.82910228 | 0.80193836 | 0.67641953 |
| cg20995564 | ZEB2;ZEB: | 2  | 0.00555806 | 0.91338083 | 0.90800505 | 0.80665069 |
| cg23095192 | ZEB2;ZEB: | 2  | 0.00121234 | 0.39983863 | 0.45185717 | 0.29316723 |
| cg26608667 | ZFAND2A   | 7  | 0.00575746 | 0.55264324 | 0.53637173 | 0.36017216 |
| cg05972185 | ZFH3;ZFI  | 16 | 0.00334886 | 0.56877749 | 0.55421877 | 0.45304638 |

|            |            |    |            |            |            |            |
|------------|------------|----|------------|------------|------------|------------|
| cg10298741 | ZFH3;ZFI   | 16 | 0.00068904 | 0.65744845 | 0.57796645 | 0.45993343 |
| cg07176589 | ZFH4;LO    | 8  | 0.03878779 | 0.72639099 | 0.75744369 | 0.62529058 |
| cg10174063 | ZFP57      | 6  | 0.0359373  | 0.5446455  | 0.61854822 | 0.35958729 |
| cg11814087 | ZFR        | 5  | 0.02049456 | 0.86957963 | 0.8862461  | 0.75397393 |
| cg26306154 | ZFYVE20    | 3  | 0.00100011 | 0.89758711 | 0.8575974  | 0.75308392 |
| cg04884025 | ZFYVE9;ZI  | 1  | 0.00065949 | 0.67919443 | 0.54122994 | 0.41704203 |
| cg26224785 | ZIC4;ZIC4; | 3  | 0.01841074 | 0.51744149 | 0.60002604 | 0.40688187 |
| cg02872693 | ZNF133;Z   | 20 | 0.00079883 | 0.8948957  | 0.82413196 | 0.71403634 |
| cg10668363 | ZNF175     | 19 | 0.03038061 | 0.8404941  | 0.81304614 | 0.7128689  |
| cg27474223 | ZNF19      | 16 | 0.00097618 | 0.788144   | 0.75257477 | 0.56359945 |
| cg01855245 | ZNF19      | 16 | 0.00186737 | 0.7934311  | 0.75744524 | 0.62424407 |
| cg18507146 | ZNF236     | 18 | 0.01506509 | 0.35824232 | 0.37727899 | 0.25198857 |
| cg27118035 | ZNF267     | 16 | 0.00341932 | 0.30541304 | 0.25939301 | 0.14309781 |
| cg14690467 | ZNF282     | 7  | 0.0008947  | 0.62517803 | 0.53806507 | 0.42256394 |
| cg02278959 | ZNF286B;   | 17 | 0.0047737  | 0.75244191 | 0.72202843 | 0.58512929 |
| cg15394911 | ZNF331;Z   | 19 | 0.00882698 | 0.84649601 | 0.82703592 | 0.7180913  |
| cg13733708 | ZNF335     | 20 | 0.02447745 | 0.5790189  | 0.54758024 | 0.42526153 |
| cg23786747 | ZNF365;Z   | 10 | 0.04639674 | 0.45727875 | 0.46948883 | 0.31635227 |
| cg03861065 | ZNF365;Z   | 10 | 0.00126535 | 0.87539161 | 0.83725003 | 0.70824461 |
| cg13823492 | ZNF365;Z   | 10 | 0.01526804 | 0.7437883  | 0.79165349 | 0.62882016 |
| cg09287086 | ZNF365;Z   | 10 | 0.00806542 | 0.845203   | 0.83875454 | 0.73818226 |
| cg21330896 | ZNF395     | 8  | 0.00206218 | 0.27482299 | 0.27371796 | 0.16926608 |
| cg07787851 | ZNF474     | 5  | 0.00081925 | 0.90144184 | 0.86361796 | 0.76225881 |
| cg21213593 | ZNF608     | 5  | 0.00930663 | 0.7960168  | 0.78410319 | 0.58852184 |
| cg16558770 | ZNF710     | 15 | 0.0091896  | 0.78466584 | 0.83702755 | 0.6389602  |
| cg09939948 | ZNF710     | 15 | 0.00337229 | 0.30886627 | 0.31226608 | 0.15869221 |
| cg02443306 |            | 11 | 0.03170823 | 0.42598012 | 0.38285436 | 0.25877884 |
| cg10308673 |            | 11 | 0.03173228 | 0.46033992 | 0.4708791  | 0.34562525 |
| cg20312077 |            | 8  | 0.00073265 | 0.68028043 | 0.57449652 | 0.44104887 |
| cg20223392 |            | 8  | 0.00152023 | 0.77809051 | 0.68915606 | 0.57264062 |
| cg10717610 |            | 2  | 0.04382199 | 0.59588737 | 0.61098507 | 0.49433477 |
| cg05464506 |            | 2  | 0.01145563 | 0.62851283 | 0.58408518 | 0.42709435 |
| cg02924234 |            | 2  | 0.00190848 | 0.76555856 | 0.68393534 | 0.50759631 |
| cg11539857 |            | 6  | 0.00065949 | 0.88047015 | 0.78185095 | 0.66620136 |
| cg08800670 |            | 6  | 0.00338706 | 0.71958688 | 0.67728119 | 0.5382111  |
| cg12686441 |            | 8  | 0.00178025 | 0.55724292 | 0.56036148 | 0.26641234 |
| cg09533087 |            | 8  | 0.00451843 | 0.83668935 | 0.8313462  | 0.7279536  |
| cg09757158 |            | 2  | 0.00220808 | 0.70444162 | 0.71283121 | 0.57274476 |
| cg19485103 |            | 6  | 0.00559757 | 0.42946757 | 0.50591856 | 0.30455213 |
| cg10454879 |            | 8  | 0.04357378 | 0.78626855 | 0.77266418 | 0.65904013 |
| cg01119145 |            | 20 | 0.0013706  | 0.63093187 | 0.60069782 | 0.49717118 |
| cg20435594 |            | 11 | 0.02195328 | 0.54040498 | 0.54299039 | 0.42030288 |
| cg26201596 |            | 10 | 0.0066172  | 0.70020361 | 0.69127587 | 0.56798136 |
| cg07178994 |            | 8  | 0.00338778 | 0.60967728 | 0.63900442 | 0.46352337 |
| cg06623778 |            | 1  | 0.01760238 | 0.56729551 | 0.58387739 | 0.42384477 |
| cg15415194 |            | 8  | 0.00294138 | 0.70395258 | 0.68407085 | 0.57536869 |

|            |    |            |            |            |            |
|------------|----|------------|------------|------------|------------|
| cg08212438 | 16 | 0.0050226  | 0.82215369 | 0.77779939 | 0.67082352 |
| cg00687073 | 8  | 0.02075001 | 0.59580811 | 0.55977362 | 0.45354713 |
| cg08945340 | 16 | 0.01862437 | 0.65453468 | 0.60020033 | 0.49990848 |
| cg07191524 | 16 | 0.00480767 | 0.74316743 | 0.7030021  | 0.56155991 |
| cg17224892 | 17 | 0.00637687 | 0.46383273 | 0.4404995  | 0.31635046 |
| cg01952913 | 8  | 0.01704845 | 0.50951253 | 0.63305688 | 0.40235766 |
| cg08474826 | 1  | 0.00105291 | 0.82444622 | 0.7557467  | 0.52537421 |
| cg01577678 | 16 | 0.00140274 | 0.81032586 | 0.74159892 | 0.59844523 |
| cg01619416 | 16 | 0.00314038 | 0.68294444 | 0.59070419 | 0.47268483 |
| cg01830154 | 17 | 0.00563159 | 0.48404765 | 0.41116552 | 0.30049119 |
| cg02296931 | 1  | 0.00997964 | 0.66540222 | 0.66100451 | 0.51814566 |
| cg26999501 | 8  | 0.02758055 | 0.86761111 | 0.88090951 | 0.75571678 |
| cg11629812 | 5  | 0.03533922 | 0.57751556 | 0.58591972 | 0.46029288 |
| cg24699005 | 19 | 0.00802316 | 0.67207034 | 0.66278436 | 0.47910295 |
| cg27094323 | 7  | 0.0156946  | 0.46742442 | 0.46495998 | 0.35590471 |
| cg12165219 | 8  | 0.01080128 | 0.8095763  | 0.73495272 | 0.62812037 |
| cg21146170 | 8  | 0.00236052 | 0.73350548 | 0.68764283 | 0.5780817  |
| cg20309975 | 8  | 0.00302287 | 0.65820469 | 0.59680576 | 0.4915372  |
| cg00320597 | 8  | 0.03302702 | 0.7379026  | 0.7710726  | 0.61795469 |
| cg12246922 | 7  | 0.00587243 | 0.72734303 | 0.66988373 | 0.55223875 |
| cg04095327 | 5  | 0.021196   | 0.40211037 | 0.43558522 | 0.29506298 |
| cg15579822 | 6  | 0.028548   | 0.73704967 | 0.73382634 | 0.61504165 |
| cg16442298 | 8  | 0.00242331 | 0.60306911 | 0.57997795 | 0.46637719 |
| cg08525429 | 7  | 0.02708404 | 0.49334176 | 0.47633626 | 0.36902514 |
| cg22013019 | 6  | 0.00133856 | 0.7184448  | 0.6924575  | 0.51633536 |
| cg11234688 | 2  | 0.00920255 | 0.68319151 | 0.6017409  | 0.44571209 |
| cg10397082 | 2  | 0.0156653  | 0.49336088 | 0.4609572  | 0.32092954 |
| cg17159058 | 8  | 0.00207771 | 0.29188528 | 0.24816249 | 0.11104196 |
| cg03503942 | 20 | 0.01485881 | 0.57458794 | 0.57524114 | 0.34866629 |
| cg08692111 | 19 | 0.02655172 | 0.41089744 | 0.40650506 | 0.27692748 |
| cg17681527 | 7  | 0.00437662 | 0.34705179 | 0.41378226 | 0.20260838 |
| cg13827584 | 7  | 0.02414194 | 0.33214136 | 0.30865113 | 0.20274931 |
| cg15684661 | 5  | 0.00147442 | 0.57533045 | 0.52569252 | 0.42183355 |
| cg05693204 | 5  | 0.00628685 | 0.61707352 | 0.60568619 | 0.48948385 |
| cg21707089 | 8  | 0.00097509 | 0.4887266  | 0.43647168 | 0.30868372 |
| cg03660096 | 8  | 0.0048909  | 0.81561707 | 0.78071699 | 0.64380211 |
| cg19462210 | 11 | 0.02511511 | 0.71562977 | 0.75147213 | 0.58847235 |
| cg18143317 | 11 | 0.00729536 | 0.62542026 | 0.60100446 | 0.49931366 |
| cg14553377 | 11 | 0.0235449  | 0.54013225 | 0.53633481 | 0.43141625 |
| cg03024791 | 11 | 0.00097509 | 0.51808049 | 0.48770683 | 0.35271484 |
| cg09476073 | 11 | 0.01423002 | 0.52182257 | 0.56475255 | 0.39480406 |
| cg26986989 | 5  | 0.00183809 | 0.69176087 | 0.67905363 | 0.56165825 |
| cg13183298 | 1  | 0.00994104 | 0.69231031 | 0.65706638 | 0.55132325 |
| cg00055986 | 5  | 0.0154863  | 0.55977013 | 0.59155928 | 0.43212108 |
| cg25794147 | 7  | 0.00725151 | 0.34005816 | 0.36609732 | 0.2250106  |
| cg21957306 | 2  | 0.03124896 | 0.67438184 | 0.66832756 | 0.53930488 |

|              |    |            |            |            |            |
|--------------|----|------------|------------|------------|------------|
| cg07611933   | 16 | 0.00128265 | 0.78935103 | 0.71302332 | 0.58108697 |
| cg15030449   | 1  | 0.00294202 | 0.48102589 | 0.5037364  | 0.3136555  |
| cg12635314   | 10 | 0.02852565 | 0.7639305  | 0.81028679 | 0.65608791 |
| cg21943117   | 1  | 0.00407141 | 0.72447036 | 0.66142083 | 0.50828577 |
| cg25720825   | 1  | 0.01809124 | 0.6273956  | 0.61259588 | 0.48738453 |
| cg13402298   | 1  | 0.00192049 | 0.8652803  | 0.88382565 | 0.70560949 |
| cg04921646   | 1  | 0.0017241  | 0.89307944 | 0.87916796 | 0.73243516 |
| cg10943263   | 6  | 0.02350362 | 0.27807347 | 0.34847963 | 0.17348968 |
| cg01977798   | 1  | 0.00219711 | 0.86854153 | 0.85182324 | 0.70969464 |
| cg00050294   | 1  | 0.00122881 | 0.85788534 | 0.80276571 | 0.62451557 |
| cg02589685   | 11 | 0.02818766 | 0.72209354 | 0.71488484 | 0.60850331 |
| cg08306076   | 6  | 0.01111549 | 0.78830729 | 0.76879875 | 0.6258436  |
| cg01462537   | 10 | 0.00380612 | 0.81182617 | 0.79525    | 0.69508558 |
| cg07295362   | 2  | 0.00878866 | 0.63096305 | 0.68303877 | 0.47537395 |
| cg24882709   | 10 | 0.00093631 | 0.84550225 | 0.80639675 | 0.66177993 |
| cg02621151   | 5  | 0.02514684 | 0.36700447 | 0.44327794 | 0.25990971 |
| cg25555753   | 19 | 0.00670577 | 0.58455208 | 0.60587543 | 0.37822746 |
| cg16428517   | 16 | 0.00065949 | 0.74344629 | 0.65471334 | 0.54804221 |
| cg03247944   | 12 | 0.02310662 | 0.46561321 | 0.50664013 | 0.36327199 |
| cg15805490   | 19 | 0.01661249 | 0.69609653 | 0.67370168 | 0.56468546 |
| cg16704703   | 10 | 0.00099274 | 0.66055054 | 0.59218539 | 0.33355045 |
| cg08698943   | 10 | 0.0012278  | 0.60065075 | 0.52241607 | 0.2673149  |
| cg11624328   | 5  | 0.01574127 | 0.65401249 | 0.67848896 | 0.52163112 |
| cg24996440   | 2  | 0.00180881 | 0.39111873 | 0.35319415 | 0.25042779 |
| cg06637330   | 5  | 0.01157637 | 0.47086133 | 0.48296571 | 0.36481155 |
| cg25354587   | 12 | 0.00225672 | 0.40371655 | 0.37452522 | 0.23776266 |
| cg13413719   | 6  | 0.00961487 | 0.79187737 | 0.7711846  | 0.56965804 |
| cg00520406   | 6  | 0.00403008 | 0.72775692 | 0.7712094  | 0.55896418 |
| cg12048965   | 10 | 0.00173751 | 0.82295242 | 0.79221694 | 0.58288825 |
| cg11964099   | 17 | 0.0036184  | 0.63087282 | 0.59687169 | 0.4427555  |
| cg03076094   | 16 | 0.02514684 | 0.54131506 | 0.54874775 | 0.41861205 |
| cg16747928   | 6  | 0.00065949 | 0.70354998 | 0.56950429 | 0.45369414 |
| cg05148180   | 10 | 0.0120439  | 0.66549839 | 0.66230576 | 0.5167674  |
| cg21995261   | 11 | 0.00323713 | 0.50719087 | 0.58575129 | 0.40477025 |
| cg02849956   | 19 | 0.00154265 | 0.4713037  | 0.364136   | 0.2151023  |
| cg27661394   | 4  | 0.00065949 | 0.71507564 | 0.57209086 | 0.40927397 |
| cg19619817   | 10 | 0.03541631 | 0.80814633 | 0.81182544 | 0.67849537 |
| cg01832712   | 3  | 0.00362881 | 0.4541846  | 0.48517436 | 0.26799101 |
| ch.4.194519R | 4  | 0.02080485 | 0.31241411 | 0.32469461 | 0.18133851 |
| cg00874032   | 3  | 0.00065949 | 0.54817416 | 0.43170576 | 0.3243168  |
| cg00512484   | 18 | 0.02013944 | 0.60955792 | 0.63448222 | 0.50131207 |
| cg15613991   | 7  | 0.01150507 | 0.53985705 | 0.49031676 | 0.39000971 |
| cg13067635   | 1  | 0.00703549 | 0.70625489 | 0.74488325 | 0.56943509 |
| cg19500334   | 1  | 0.00931986 | 0.3519897  | 0.34462053 | 0.23918813 |
| cg05586863   | 16 | 0.00804549 | 0.75576584 | 0.74712041 | 0.62516349 |
| cg05144620   | 17 | 0.00085205 | 0.49495043 | 0.45853525 | 0.32121864 |

|            |    |            |            |            |            |
|------------|----|------------|------------|------------|------------|
| cg10898182 | 5  | 0.00184921 | 0.76025826 | 0.75607574 | 0.62383492 |
| cg15222329 | 5  | 0.00186737 | 0.39942611 | 0.39716795 | 0.28301603 |
| cg15463580 | 19 | 0.00223531 | 0.6054535  | 0.56973672 | 0.45934553 |
| cg19726711 | 10 | 0.00101151 | 0.55874284 | 0.47483972 | 0.36480035 |
| cg10601624 | 12 | 0.00073378 | 0.5828343  | 0.54873672 | 0.34937983 |
| cg11404945 | 1  | 0.00597821 | 0.6394587  | 0.59596966 | 0.48863548 |
| cg07142009 | 17 | 0.00503319 | 0.65377062 | 0.69307236 | 0.43239192 |
| cg21922810 | 1  | 0.04280685 | 0.36314681 | 0.34482493 | 0.23774066 |
| cg10721538 | 17 | 0.0452911  | 0.48434893 | 0.5225808  | 0.36510331 |
| cg08090407 | 7  | 0.00246888 | 0.21977131 | 0.22826796 | 0.11486962 |
| cg27594683 | 6  | 0.00814151 | 0.32924791 | 0.32723971 | 0.21475536 |
| cg16799831 | 6  | 0.00745657 | 0.42999564 | 0.42663201 | 0.28013085 |
| cg03263730 | 1  | 0.0338225  | 0.77375972 | 0.81538557 | 0.67337267 |
| cg22229039 | 1  | 0.01870855 | 0.77563902 | 0.79148542 | 0.61861346 |
| cg02312715 | 5  | 0.00429038 | 0.84019853 | 0.82764003 | 0.71575741 |
| cg26118643 | 1  | 0.00091059 | 0.71521327 | 0.67307908 | 0.53293839 |
| cg08375396 | 11 | 0.00081925 | 0.84912424 | 0.78506376 | 0.67000643 |
| cg13014219 | 4  | 0.03718903 | 0.36734797 | 0.3627556  | 0.25911939 |
| cg06322557 | 3  | 0.00753326 | 0.66656343 | 0.68743659 | 0.50018957 |
| cg14366742 | 4  | 0.01030631 | 0.40806229 | 0.41756946 | 0.27915927 |
| cg08894532 | 19 | 0.01925109 | 0.56595468 | 0.5670759  | 0.4410549  |
| cg08015107 | 11 | 0.02004883 | 0.53301362 | 0.5649469  | 0.40386484 |
| cg18100045 | 3  | 0.00083228 | 0.59956827 | 0.49324904 | 0.3270282  |
| cg00034336 | 2  | 0.00783897 | 0.64979537 | 0.64605467 | 0.47364069 |
| cg15074524 | 2  | 0.00733126 | 0.67997403 | 0.68986568 | 0.44329002 |
| cg15981982 | 2  | 0.00930663 | 0.76459558 | 0.75605313 | 0.57627539 |
| cg03614721 | 5  | 0.00335524 | 0.45406229 | 0.44777898 | 0.27521994 |
| cg00184457 | 8  | 0.01574127 | 0.70083645 | 0.76252594 | 0.54078534 |
| cg05405914 | 16 | 0.01890283 | 0.43814501 | 0.43247736 | 0.32136645 |
| cg08943045 | 1  | 0.01764264 | 0.58866368 | 0.54821769 | 0.40001609 |
| cg10377510 | 1  | 0.02360575 | 0.47730454 | 0.49685208 | 0.32540294 |
| cg22373770 | 1  | 0.00419259 | 0.36936302 | 0.26966303 | 0.15831908 |
| cg16102739 | 1  | 0.04265641 | 0.61613211 | 0.57540415 | 0.44862437 |
| cg13693328 | 1  | 0.00230968 | 0.49274618 | 0.53290769 | 0.29321849 |
| cg05933510 | 1  | 0.00648185 | 0.80489674 | 0.79712838 | 0.5951371  |
| cg22730655 | 1  | 0.00453677 | 0.52459757 | 0.52344887 | 0.37244468 |
| cg01246390 | 12 | 0.00486472 | 0.84285132 | 0.86170188 | 0.72898564 |
| cg27511894 | 1  | 0.00436875 | 0.62120927 | 0.61602578 | 0.4320176  |
| cg01450566 | 20 | 0.00280561 | 0.66100692 | 0.65471958 | 0.51546692 |
| cg11018892 | 6  | 0.00127427 | 0.79401727 | 0.77078263 | 0.63714793 |
| cg13468767 | 17 | 0.00851187 | 0.37686628 | 0.29302083 | 0.18009515 |
| cg11374933 | 8  | 0.00297992 | 0.47086694 | 0.47257921 | 0.33132532 |
| cg03959186 | 2  | 0.0111106  | 0.39401262 | 0.37575867 | 0.22039399 |
| cg18320356 | 12 | 0.00623289 | 0.69830718 | 0.66572956 | 0.42700918 |
| cg13716880 | 2  | 0.00391578 | 0.74264741 | 0.73337129 | 0.6034245  |
| cg07353006 | 8  | 0.02389893 | 0.43864204 | 0.46037408 | 0.32813552 |

|            |    |            |            |            |            |
|------------|----|------------|------------|------------|------------|
| cg24134018 | 18 | 0.04180327 | 0.62120517 | 0.56570768 | 0.42094941 |
| cg05940672 | 2  | 0.01098413 | 0.57853031 | 0.65070063 | 0.4652947  |
| cg06828143 | 5  | 0.04649715 | 0.41268628 | 0.44404116 | 0.30109874 |
| cg20052760 | 6  | 0.00855749 | 0.44025917 | 0.49124049 | 0.32084433 |
| cg24505713 | 11 | 0.01546656 | 0.35993484 | 0.35239471 | 0.24169135 |
| cg10466548 | 16 | 0.00291147 | 0.43361188 | 0.41747653 | 0.22350652 |
| cg04224025 | 1  | 0.01096356 | 0.72514862 | 0.77302331 | 0.62083712 |
| cg23919830 | 21 | 0.01729366 | 0.57024472 | 0.60091812 | 0.46539964 |
| cg01303055 | 11 | 0.01193746 | 0.53803906 | 0.49319244 | 0.38469861 |
| cg08493063 | 16 | 0.01677529 | 0.55284013 | 0.56385833 | 0.41487272 |
| cg09528494 | 8  | 0.00177922 | 0.58161756 | 0.54911743 | 0.34668866 |
| cg04136456 | 1  | 0.00290723 | 0.40803867 | 0.42366951 | 0.22158654 |
| cg06946797 | 16 | 0.00381415 | 0.44205812 | 0.44731613 | 0.26457696 |
| cg15952840 | 8  | 0.01575731 | 0.56790967 | 0.55157778 | 0.44693735 |
| cg01510278 | 16 | 0.00318264 | 0.55405794 | 0.43314533 | 0.24802085 |
| cg09232555 | 8  | 0.00618952 | 0.78136258 | 0.80454713 | 0.67017709 |
| cg16251016 | 19 | 0.0006776  | 0.63345451 | 0.56554858 | 0.43015417 |
| cg03052004 | 6  | 0.01465218 | 0.85180157 | 0.86276312 | 0.74549322 |
| cg07593977 | 8  | 0.00758031 | 0.76653754 | 0.74490103 | 0.52674847 |
| cg07283896 | 6  | 0.00396544 | 0.53233308 | 0.57157899 | 0.28998337 |
| cg26394636 | 10 | 0.0470817  | 0.72413414 | 0.81539562 | 0.62128115 |
| cg22877366 | 1  | 0.00283769 | 0.50569397 | 0.48735999 | 0.36205374 |
| cg19800032 | 7  | 0.03308492 | 0.50732703 | 0.50510006 | 0.39648613 |
| cg04399631 | 3  | 0.00065949 | 0.76661482 | 0.68052378 | 0.49237629 |
| cg15930777 | 6  | 0.00167382 | 0.76212092 | 0.77842359 | 0.66049352 |
| cg25476130 | 8  | 0.00925322 | 0.63046577 | 0.59318439 | 0.46866946 |
| cg03309393 | 6  | 0.01206219 | 0.78695892 | 0.81079202 | 0.6661623  |
| cg16474118 | 2  | 0.00076471 | 0.84072386 | 0.73164821 | 0.50088569 |
| cg04137004 | 11 | 0.0008386  | 0.84061977 | 0.78785059 | 0.62640164 |
| cg04057599 | 11 | 0.00073118 | 0.87729776 | 0.82326506 | 0.67859023 |
| cg01702055 | 6  | 0.00639169 | 0.62820382 | 0.58854324 | 0.41101988 |
| cg07417348 | 12 | 0.00160583 | 0.29170051 | 0.32227759 | 0.14290996 |
| cg06857289 | 4  | 0.0015667  | 0.38124065 | 0.47864244 | 0.27598043 |
| cg18120446 | 4  | 0.00949739 | 0.64990616 | 0.75042611 | 0.47298328 |
| cg00339682 | 4  | 0.00395839 | 0.70435265 | 0.73050566 | 0.42922334 |
| cg00964997 | 4  | 0.01435007 | 0.76957051 | 0.84720557 | 0.57508081 |
| cg22560214 | 4  | 0.0157632  | 0.73512533 | 0.81242244 | 0.57150283 |
| cg06635722 | 4  | 0.01162689 | 0.57251415 | 0.64119401 | 0.45692237 |
| cg05710540 | 4  | 0.00736725 | 0.64103509 | 0.65503587 | 0.53048112 |
| cg19019849 | 4  | 0.02633873 | 0.61351786 | 0.65583619 | 0.51268812 |
| cg14144025 | 4  | 0.00364684 | 0.35368331 | 0.42256349 | 0.25291954 |
| cg02373784 | 4  | 0.0336255  | 0.66215744 | 0.72964289 | 0.53532189 |
| cg10134799 | 6  | 0.0008696  | 0.69346137 | 0.63397108 | 0.4420081  |
| cg17593342 | 6  | 0.00555868 | 0.6802823  | 0.67500722 | 0.54697558 |
| cg02849507 | 16 | 0.00441677 | 0.67399339 | 0.65140697 | 0.44664927 |
| cg01612366 | 4  | 0.00756169 | 0.27738064 | 0.27591938 | 0.15400253 |

|            |    |            |            |            |            |
|------------|----|------------|------------|------------|------------|
| cg26508928 | 18 | 0.02672791 | 0.64918736 | 0.65600021 | 0.54061963 |
| cg21649089 | 17 | 0.00354864 | 0.4418972  | 0.42368549 | 0.30301118 |
| cg10519417 | 17 | 0.00223317 | 0.7258834  | 0.68259312 | 0.48272859 |
| cg09584358 | 17 | 0.00755255 | 0.5346157  | 0.52482208 | 0.33003738 |
| cg15893295 | 6  | 0.00445086 | 0.74079476 | 0.70228846 | 0.4981656  |
| cg12197573 | 18 | 0.00175728 | 0.51423388 | 0.48559065 | 0.34472918 |
| cg26104072 | 5  | 0.02763008 | 0.45396862 | 0.50866683 | 0.35361093 |
| cg22164009 | 6  | 0.01687692 | 0.49803044 | 0.48346122 | 0.34055514 |
| cg08136020 | 6  | 0.00627871 | 0.68303959 | 0.6580781  | 0.44478449 |
| cg18112794 | 21 | 0.00223317 | 0.2838576  | 0.26697753 | 0.16325402 |
| cg18489994 | 4  | 0.00180551 | 0.46583946 | 0.38776233 | 0.20023914 |
| cg25827670 | 17 | 0.00067859 | 0.69118531 | 0.5863973  | 0.40255551 |
| cg09663343 | 11 | 0.01309153 | 0.78125529 | 0.75265615 | 0.61867207 |
| cg03176917 | 19 | 0.00128812 | 0.43147745 | 0.41612848 | 0.14354481 |
| cg23104436 | 11 | 0.00132036 | 0.89291046 | 0.84068529 | 0.72660942 |
| cg13911697 | 11 | 0.00074016 | 0.85822441 | 0.83722922 | 0.73013804 |
| cg26250400 | 19 | 0.00197007 | 0.3528754  | 0.34982768 | 0.24411632 |
| cg27584135 | 3  | 0.0051502  | 0.64797669 | 0.69591983 | 0.42650446 |
| cg11997536 | 19 | 0.00103895 | 0.42049375 | 0.43057735 | 0.26581731 |
| cg07812957 | 19 | 0.00280852 | 0.66628414 | 0.57175959 | 0.45061346 |
| cg11492723 | 3  | 0.00878866 | 0.34553865 | 0.36636963 | 0.22484725 |
| cg20405742 | 6  | 0.00217555 | 0.74503601 | 0.65416672 | 0.51277853 |
| cg02292809 | 6  | 0.00333361 | 0.47398215 | 0.58975597 | 0.35608386 |
| cg26906217 | 11 | 0.04433808 | 0.59170309 | 0.6117786  | 0.42625298 |
| cg04456219 | 7  | 0.0292294  | 0.58082032 | 0.52187961 | 0.37989367 |
| cg08939394 | 1  | 0.00164877 | 0.63938432 | 0.62188267 | 0.39759251 |
| cg22146612 | 6  | 0.007634   | 0.75437247 | 0.73296572 | 0.62381474 |
| cg12512771 | 7  | 0.02080485 | 0.70380134 | 0.73508634 | 0.50565669 |
| cg22012281 | 22 | 0.00486472 | 0.58357496 | 0.57606675 | 0.4148116  |
| cg06937927 | 8  | 0.0011206  | 0.6289096  | 0.61797064 | 0.48551821 |
| cg04139043 | 1  | 0.00066232 | 0.71718307 | 0.61494912 | 0.44872896 |
| cg18890112 | 1  | 0.01891509 | 0.54060046 | 0.55886353 | 0.42474387 |
| cg17109725 | 1  | 0.00855749 | 0.44934903 | 0.45408434 | 0.32368313 |
| cg24095864 | 22 | 0.00299125 | 0.39455763 | 0.40405258 | 0.27321964 |
| cg26220594 | 1  | 0.01657372 | 0.36859499 | 0.40307783 | 0.23152757 |
| cg11630152 | 7  | 0.00362881 | 0.82585096 | 0.72849153 | 0.62007156 |
| cg06615816 | 3  | 0.00349009 | 0.49673574 | 0.49185031 | 0.3763952  |
| cg15509286 | 3  | 0.00333721 | 0.6826706  | 0.66595866 | 0.50557564 |
| cg12253071 | 4  | 0.00572656 | 0.74795768 | 0.70319432 | 0.59288753 |
| cg07866909 | 2  | 0.00065949 | 0.77439834 | 0.66664743 | 0.50129707 |
| cg20082877 | 18 | 0.00144767 | 0.63473194 | 0.62295237 | 0.34835534 |
| cg14799457 | 18 | 0.01015464 | 0.5866579  | 0.53924357 | 0.42624919 |
| cg23614811 | 17 | 0.00947108 | 0.43019341 | 0.41346425 | 0.22995618 |
| cg26727231 | 8  | 0.00073547 | 0.63978616 | 0.56416748 | 0.45144845 |
| cg09772075 | 8  | 0.00506299 | 0.64380373 | 0.62544455 | 0.4677142  |
| cg09539496 | 8  | 0.00155548 | 0.71291366 | 0.69288794 | 0.55309213 |

|            |    |            |            |            |            |
|------------|----|------------|------------|------------|------------|
| cg18014547 | 2  | 0.00320302 | 0.8616179  | 0.82981493 | 0.71377814 |
| cg23047322 | 17 | 0.00263648 | 0.75631874 | 0.73740713 | 0.63662168 |
| cg06195193 | 13 | 0.002776   | 0.26416468 | 0.28130045 | 0.1580562  |
| cg27282397 | 2  | 0.00092783 | 0.86496377 | 0.80297673 | 0.64271522 |
| cg10149296 | 2  | 0.00178025 | 0.82260071 | 0.75751693 | 0.57451136 |
| cg04526480 | 1  | 0.00174783 | 0.47097901 | 0.40465692 | 0.30305128 |
| cg23489384 | 14 | 0.01398885 | 0.41370431 | 0.49054428 | 0.19138756 |
| cg01298102 | 16 | 0.00857669 | 0.6592922  | 0.63750806 | 0.50664278 |
| cg13048903 | 13 | 0.0067125  | 0.68007506 | 0.75210301 | 0.53986578 |
| cg00580562 | 10 | 0.04980289 | 0.49776228 | 0.51357116 | 0.36085546 |
| cg26562263 | 19 | 0.03368408 | 0.67007696 | 0.74313696 | 0.56465074 |
| cg04526361 | 7  | 0.00575863 | 0.46855528 | 0.54944566 | 0.36733068 |
| cg13819609 | 9  | 0.00491697 | 0.82831588 | 0.83944788 | 0.70781185 |
| cg08243401 | 13 | 0.00159552 | 0.78845312 | 0.77395073 | 0.62904971 |
| cg03499161 | 12 | 0.00380612 | 0.40725539 | 0.38977552 | 0.23167442 |
| cg01164574 | 21 | 0.00167443 | 0.50184781 | 0.45574932 | 0.29116283 |
| cg03720745 | 8  | 0.0013706  | 0.54545767 | 0.50115361 | 0.38191976 |
| cg11260715 | 7  | 0.01463726 | 0.43194783 | 0.44320712 | 0.28091829 |
| cg23261107 | 7  | 0.01457962 | 0.79746352 | 0.81776102 | 0.69401997 |
| cg17722435 | 7  | 0.00627871 | 0.793261   | 0.7584339  | 0.63896944 |
| cg04819760 | 10 | 0.00547327 | 0.37411824 | 0.38293825 | 0.21695754 |
| cg25324047 | 10 | 0.02496653 | 0.73566496 | 0.77339233 | 0.62144574 |
| cg17077610 | 10 | 0.00501214 | 0.57323678 | 0.6195407  | 0.33629959 |
| cg15772157 | 10 | 0.02229636 | 0.7501667  | 0.75871467 | 0.54762831 |
| cg15732079 | 7  | 0.00065949 | 0.73788416 | 0.57178701 | 0.4171243  |
| cg10193711 | 14 | 0.0135118  | 0.5796739  | 0.54150474 | 0.35954094 |
| cg13716585 | 14 | 0.01158752 | 0.70473555 | 0.70804345 | 0.53769991 |
| cg26118358 | 14 | 0.00270636 | 0.6883165  | 0.59581589 | 0.35012565 |
| cg05068848 | 4  | 0.01019185 | 0.82565115 | 0.82717627 | 0.62842971 |
| cg00045910 | 10 | 0.00387834 | 0.26030111 | 0.30456461 | 0.15665625 |
| cg04349084 | 8  | 0.00595714 | 0.69665007 | 0.67665791 | 0.4538444  |
| cg14893576 | 2  | 0.02794807 | 0.39288954 | 0.3845999  | 0.25430802 |
| cg04427254 | 19 | 0.00151706 | 0.31951464 | 0.29846028 | 0.16079061 |
| cg16152753 | 10 | 0.01452282 | 0.60716891 | 0.59319362 | 0.41896142 |
| cg12228534 | 19 | 0.00582851 | 0.63348015 | 0.64211314 | 0.50361723 |
| cg01364674 | 1  | 0.00103808 | 0.61275037 | 0.55151513 | 0.45111595 |
| cg07447769 | 13 | 0.03660254 | 0.65193137 | 0.63011829 | 0.51355425 |
| cg04104789 | 15 | 0.01991471 | 0.63390652 | 0.65890723 | 0.52829861 |
| cg24911283 | 4  | 0.02151984 | 0.75996375 | 0.7326381  | 0.61953134 |
| cg12378001 | 7  | 0.00065949 | 0.85611354 | 0.77477612 | 0.62028521 |
| cg02322889 | 4  | 0.00065949 | 0.78370003 | 0.70766147 | 0.58824791 |
| cg18565795 | 10 | 0.01376061 | 0.75913511 | 0.71575226 | 0.61196565 |
| cg12899747 | 3  | 0.00855749 | 0.64356231 | 0.64621115 | 0.43950098 |
| cg00150785 | 20 | 0.00081046 | 0.67736303 | 0.56908476 | 0.39023311 |
| cg10097313 | 14 | 0.00065949 | 0.78411621 | 0.70298227 | 0.4949627  |
| cg14830371 | 8  | 0.00107365 | 0.29302051 | 0.21905682 | 0.11230261 |



|            |    |            |            |            |            |
|------------|----|------------|------------|------------|------------|
| cg17896243 | 8  | 0.01235814 | 0.46200999 | 0.44407497 | 0.29011006 |
| cg03002688 | 4  | 0.00309052 | 0.71247749 | 0.66888493 | 0.44952852 |
| cg21544415 | 12 | 0.0048909  | 0.5736952  | 0.49415889 | 0.37794169 |
| cg10780778 | 6  | 0.01971434 | 0.58307089 | 0.61808445 | 0.45741002 |
| cg23756173 | 17 | 0.01463726 | 0.45127279 | 0.43487307 | 0.30648864 |
| cg27134139 | 10 | 0.00369078 | 0.36316075 | 0.36160494 | 0.24564528 |
| cg23221603 | 2  | 0.01095648 | 0.69247796 | 0.71211358 | 0.54489901 |
| cg09654261 | 11 | 0.00065949 | 0.74455242 | 0.63417491 | 0.48232854 |
| cg09395805 | 6  | 0.04649715 | 0.58547361 | 0.62500384 | 0.46426095 |
| cg17642941 | 7  | 0.00903599 | 0.79903835 | 0.87278086 | 0.64440707 |
| cg06982190 | 7  | 0.03523391 | 0.58704043 | 0.65534438 | 0.45063297 |
| cg26533311 | 6  | 0.01456284 | 0.45027952 | 0.42446574 | 0.28293717 |
| cg16211174 | 7  | 0.00897906 | 0.63515346 | 0.62314197 | 0.49773217 |
| cg17694351 | 7  | 0.02979258 | 0.66611512 | 0.66244741 | 0.42402412 |
| cg02063817 | 7  | 0.02763008 | 0.69258691 | 0.74969476 | 0.56813161 |
| cg21252523 | 7  | 0.02078916 | 0.73328363 | 0.72524221 | 0.5871032  |
| cg05057910 | 7  | 0.00757575 | 0.58351174 | 0.57348286 | 0.42329416 |
| cg04004787 | 7  | 0.00551198 | 0.80487728 | 0.82449405 | 0.56275693 |
| cg23346622 | 7  | 0.00228505 | 0.31784024 | 0.28928337 | 0.18181205 |
| cg23998071 | 7  | 0.00702677 | 0.4480308  | 0.43870159 | 0.27433534 |
| cg09678539 | 2  | 0.01769764 | 0.60211802 | 0.5930299  | 0.46412    |
| cg03402926 | 11 | 0.00095394 | 0.57465343 | 0.57043663 | 0.43350035 |
| cg21437157 | 8  | 0.00450197 | 0.4430854  | 0.46073237 | 0.24687617 |
| cg04522310 | 16 | 0.00211366 | 0.7182449  | 0.69608159 | 0.46034032 |
| cg03834116 | 2  | 0.01678444 | 0.58437176 | 0.5344052  | 0.42907265 |
| cg12143499 | 12 | 0.01296171 | 0.69880406 | 0.70928655 | 0.49579158 |
| cg15921887 | 10 | 0.00218799 | 0.53312139 | 0.46680501 | 0.36115046 |
| cg17284116 | 11 | 0.02008355 | 0.67941399 | 0.64398723 | 0.54043438 |
| cg01037082 | 22 | 0.04248615 | 0.70159792 | 0.74429295 | 0.55251585 |
| cg22500261 | 22 | 0.00323448 | 0.6838412  | 0.66984238 | 0.33496064 |
| cg17955599 | 22 | 0.00964959 | 0.66032471 | 0.65591128 | 0.52094443 |
| cg13873324 | 1  | 0.00422127 | 0.48151804 | 0.47774388 | 0.30276363 |
| cg13215862 | 15 | 0.0088828  | 0.45350579 | 0.47901506 | 0.33001688 |
| cg25653641 | 6  | 0.0122594  | 0.63128776 | 0.61135865 | 0.48269973 |
| cg27535677 | 6  | 0.03934159 | 0.72053649 | 0.74090064 | 0.592411   |
| cg22452837 | 6  | 0.01029727 | 0.30633891 | 0.30650977 | 0.17278309 |
| cg10582608 | 6  | 0.03686125 | 0.36826558 | 0.33081643 | 0.22931986 |
| cg00204512 | 16 | 0.02016391 | 0.58879681 | 0.52417378 | 0.42089516 |
| cg01116161 | 5  | 0.0249821  | 0.90762939 | 0.90182725 | 0.77842198 |
| cg27198040 | 12 | 0.00878866 | 0.78118672 | 0.75292617 | 0.6209335  |
| cg22863700 | 5  | 0.03832563 | 0.69194419 | 0.63275843 | 0.51704882 |
| cg04926881 | 7  | 0.00100759 | 0.53486094 | 0.48622874 | 0.22173728 |
| cg24561305 | 13 | 0.00553815 | 0.41365428 | 0.41238524 | 0.28078071 |
| cg10368834 | 16 | 0.00722201 | 0.64643775 | 0.64139389 | 0.53110975 |
| cg21831467 | 13 | 0.02389893 | 0.73570209 | 0.76002334 | 0.63203005 |
| cg04745064 | 6  | 0.00195644 | 0.77667487 | 0.7443352  | 0.64072216 |

|            |    |            |            |            |            |
|------------|----|------------|------------|------------|------------|
| cg11638399 | 8  | 0.03366673 | 0.67782166 | 0.67434799 | 0.51311629 |
| cg15717275 | 22 | 0.00857669 | 0.61674559 | 0.61657598 | 0.42939077 |
| cg25699073 | 6  | 0.03452515 | 0.881593   | 0.8854617  | 0.77572235 |
| cg06032337 | 6  | 0.00429038 | 0.63530038 | 0.58549288 | 0.23741592 |
| cg20228636 | 6  | 0.02003709 | 0.78035259 | 0.77605319 | 0.5494641  |
| cg11383134 | 6  | 0.01430792 | 0.80944121 | 0.85078536 | 0.65509324 |
| cg03449857 | 6  | 0.0157632  | 0.77504251 | 0.77088912 | 0.49539941 |
| cg15570656 | 6  | 0.02641471 | 0.79017031 | 0.7951158  | 0.54415016 |
| cg02157626 | 6  | 0.00659132 | 0.77779618 | 0.79098544 | 0.5154296  |
| cg13835168 | 6  | 0.03541631 | 0.67284324 | 0.64970872 | 0.40682267 |
| cg08041448 | 6  | 0.04407901 | 0.62640207 | 0.6403526  | 0.41053073 |
| cg24100841 | 6  | 0.00763406 | 0.75869924 | 0.77041731 | 0.50300068 |
| cg19636627 | 6  | 0.03587201 | 0.81067065 | 0.83361469 | 0.57566458 |
| cg06458771 | 6  | 0.03914927 | 0.58367943 | 0.65059569 | 0.38039731 |
| cg06503981 | 6  | 0.00560808 | 0.84688189 | 0.79873518 | 0.60666677 |
| cg15967278 | 8  | 0.01787304 | 0.66773627 | 0.70450617 | 0.54227993 |
| cg20907614 | 8  | 0.01540791 | 0.81611183 | 0.76855461 | 0.66494565 |
| cg00578614 | 6  | 0.0044883  | 0.52039988 | 0.57943676 | 0.33575857 |
| cg09558425 | 10 | 0.00074381 | 0.6719681  | 0.58963582 | 0.4738622  |
| cg06480353 | 7  | 0.00065949 | 0.53731677 | 0.38377243 | 0.25480201 |
| cg00344308 | 3  | 0.0071433  | 0.75706766 | 0.75572152 | 0.54195719 |
| cg27268352 | 10 | 0.00754448 | 0.77794989 | 0.84260736 | 0.63664247 |
| cg02640104 | 13 | 0.00339981 | 0.5576056  | 0.55890187 | 0.26575457 |
| cg16783186 | 2  | 0.00144772 | 0.66111788 | 0.61181192 | 0.38603478 |
| cg10577819 | 2  | 0.00066232 | 0.85915822 | 0.76388014 | 0.62326136 |
| cg11564601 | 22 | 0.02002893 | 0.41273498 | 0.41111999 | 0.23989808 |
| cg14129735 | 6  | 0.01481543 | 0.67493423 | 0.72162989 | 0.52376562 |
| cg20873416 | 6  | 0.02087024 | 0.76307795 | 0.78408666 | 0.63419518 |
| cg10784519 | 6  | 0.00530406 | 0.41760288 | 0.41788956 | 0.23072908 |
| cg03813377 | 6  | 0.0147912  | 0.35097149 | 0.33925532 | 0.22275712 |
| cg07082447 | 11 | 0.03783756 | 0.67077745 | 0.68213956 | 0.5348759  |
| cg11781335 | 10 | 0.01657372 | 0.6401527  | 0.70333199 | 0.53107085 |
| cg14189441 | 10 | 0.00068471 | 0.80290559 | 0.73591223 | 0.570632   |
| cg01511901 | 13 | 0.00139627 | 0.26609049 | 0.24150728 | 0.13051862 |
| cg18890461 | 6  | 0.0097133  | 0.30841292 | 0.30541077 | 0.18991821 |
| cg05775862 | 10 | 0.00398606 | 0.25849256 | 0.2423733  | 0.11534422 |
| cg13426642 | 12 | 0.00220808 | 0.72748283 | 0.70766426 | 0.55201973 |
| cg03127349 | 10 | 0.00065949 | 0.58063212 | 0.44615906 | 0.24968258 |
| cg07851290 | 2  | 0.01631013 | 0.39400456 | 0.3859055  | 0.27415775 |
| cg02914097 | 3  | 0.00228672 | 0.48011654 | 0.42318494 | 0.2453472  |
| cg01076704 | 20 | 0.01484626 | 0.67792625 | 0.71418058 | 0.52896627 |
| cg00516092 | 20 | 0.01390151 | 0.34239069 | 0.32819258 | 0.20375634 |
| cg18016304 | 15 | 0.01512979 | 0.62223069 | 0.637204   | 0.52024949 |
| cg06618134 | 5  | 0.03896039 | 0.47395474 | 0.39720488 | 0.29069883 |
| cg06434490 | 6  | 0.00444287 | 0.79657398 | 0.79206443 | 0.65423803 |
| cg19410609 | 2  | 0.00351772 | 0.8159067  | 0.86235303 | 0.65590113 |

|            |    |            |            |            |            |
|------------|----|------------|------------|------------|------------|
| cg00960906 | 5  | 0.00131467 | 0.49056747 | 0.39817635 | 0.2872343  |
| cg09372486 | 19 | 0.04615769 | 0.55647964 | 0.55202929 | 0.43115409 |
| cg07096763 | 1  | 0.0156946  | 0.44670821 | 0.45086189 | 0.30120388 |
| cg20465333 | 22 | 0.02802634 | 0.48415384 | 0.49419608 | 0.37924533 |
| cg15025379 | 11 | 0.00065949 | 0.63713401 | 0.54828668 | 0.37761412 |
| cg05935961 | 11 | 0.0013706  | 0.55478935 | 0.52510467 | 0.42017249 |
| cg19802929 | 14 | 0.01694602 | 0.6966157  | 0.70533104 | 0.53432119 |
| cg17942618 | 1  | 0.00186737 | 0.31416565 | 0.31211825 | 0.19317053 |
| cg00119778 | 6  | 0.01877442 | 0.23253312 | 0.23921813 | 0.10178313 |
| cg12362478 | 7  | 0.01677529 | 0.47216013 | 0.50465116 | 0.3625508  |
| cg10334416 | 17 | 0.00273943 | 0.83587219 | 0.810915   | 0.68242033 |
| cg01987353 | 17 | 0.00563693 | 0.76640637 | 0.80812661 | 0.57116376 |
| cg07007382 | 6  | 0.01020581 | 0.34165149 | 0.38512021 | 0.21968559 |
| cg07056079 | 6  | 0.01782206 | 0.26398739 | 0.25918524 | 0.1522272  |
| cg02273797 | 1  | 0.02343917 | 0.47468681 | 0.48883869 | 0.36394015 |
| cg14232108 | 9  | 0.00369903 | 0.59624107 | 0.63428536 | 0.36033755 |
| cg23138250 | 5  | 0.00178025 | 0.53028301 | 0.45303112 | 0.34845231 |
| cg25898192 | 15 | 0.00344958 | 0.30487988 | 0.2306965  | 0.1071693  |
| cg06223926 | 10 | 0.00072814 | 0.72101426 | 0.62668229 | 0.39863674 |
| cg16031846 | 8  | 0.00349377 | 0.49822498 | 0.5231728  | 0.39134798 |
| cg11760395 | 10 | 0.00082513 | 0.70009781 | 0.58961807 | 0.44241787 |
| cg08365609 | 19 | 0.00947108 | 0.78965516 | 0.73135937 | 0.58168748 |
| cg12016405 | 6  | 0.002727   | 0.80488945 | 0.78415022 | 0.65996334 |
| cg15626881 | 7  | 0.03934159 | 0.62214063 | 0.62708857 | 0.51821112 |
| cg05512561 | 13 | 0.00263491 | 0.49719265 | 0.47200953 | 0.33515475 |
| cg03116182 | 11 | 0.01473127 | 0.38394092 | 0.41330493 | 0.27045435 |
| cg08854586 | 13 | 0.00128725 | 0.51025437 | 0.46081412 | 0.35267046 |
| cg04762129 | 6  | 0.02895902 | 0.49983328 | 0.48430705 | 0.36265748 |
| cg20170223 | 20 | 0.0156698  | 0.5662969  | 0.5856014  | 0.45974747 |
| cg26550214 | 5  | 0.00233439 | 0.27353663 | 0.22922834 | 0.12301145 |
| cg23201812 | 11 | 0.00170239 | 0.2929566  | 0.23348139 | 0.10220502 |
| cg06287548 | 21 | 0.01820811 | 0.59954794 | 0.64016775 | 0.46199002 |
| cg00974255 | 17 | 0.00280852 | 0.67781994 | 0.68684718 | 0.55042168 |
| cg20814718 | 8  | 0.00076471 | 0.55040764 | 0.58304425 | 0.41532433 |
| cg15481493 | 11 | 0.01317469 | 0.82385447 | 0.83077002 | 0.69416399 |
| cg07979348 | 20 | 0.0006736  | 0.62301357 | 0.51279485 | 0.4109111  |
| cg12837463 | 7  | 0.01670995 | 0.67553501 | 0.70487917 | 0.54000924 |
| cg23155333 | 19 | 0.01665552 | 0.5987986  | 0.63487834 | 0.47967076 |
| cg17998530 | 22 | 0.0042395  | 0.35890414 | 0.35431193 | 0.25150943 |
| cg17367078 | 22 | 0.00925322 | 0.47447119 | 0.44930225 | 0.34795452 |
| cg18388547 | 1  | 0.00174783 | 0.49942818 | 0.50723229 | 0.29451552 |
| cg19530168 | 11 | 0.00197639 | 0.62497757 | 0.54155044 | 0.38001392 |
| cg21913652 | 11 | 0.01178392 | 0.78154453 | 0.79258016 | 0.63258582 |
| cg04244152 | 10 | 0.00073547 | 0.83496341 | 0.76229619 | 0.63846422 |
| cg08272572 | 19 | 0.02086555 | 0.50659093 | 0.55138505 | 0.40311762 |
| cg01166876 | 2  | 0.00732415 | 0.70653396 | 0.72054685 | 0.60233194 |

|             |    |            |            |            |            |
|-------------|----|------------|------------|------------|------------|
| cg03214130  | 7  | 0.00380612 | 0.43179276 | 0.44082236 | 0.24974244 |
| cg16569309  | 19 | 0.02512074 | 0.82347334 | 0.8298727  | 0.58783222 |
| cg03149958  | 6  | 0.02595684 | 0.69152994 | 0.67819776 | 0.57686845 |
| cg18814699  | 7  | 0.00506656 | 0.79572051 | 0.74826995 | 0.63651109 |
| cg14420953  | 6  | 0.00092849 | 0.67074617 | 0.60553314 | 0.48700304 |
| cg13057055  | 17 | 0.02496653 | 0.46568227 | 0.46483271 | 0.34975191 |
| cg211172011 | 21 | 0.02614058 | 0.76993423 | 0.8376607  | 0.65291785 |
| cg05389236  | 6  | 0.00202314 | 0.7033758  | 0.67048828 | 0.50108665 |
| cg03796381  | 15 | 0.00372084 | 0.66226422 | 0.64682457 | 0.42757717 |
| cg26027052  | 6  | 0.03934159 | 0.26024689 | 0.29902272 | 0.15673883 |
| cg13017983  | 8  | 0.00150566 | 0.32865844 | 0.27667938 | 0.15449905 |
| cg14214856  | 10 | 0.00376781 | 0.43051981 | 0.45697573 | 0.28786922 |
| cg10587854  | 3  | 0.03528716 | 0.39266457 | 0.44764953 | 0.27099895 |
| cg06971224  | 10 | 0.02757672 | 0.63252737 | 0.54353532 | 0.30492773 |
| cg20745381  | 1  | 0.0103161  | 0.3125792  | 0.30678189 | 0.2039843  |
| cg04640920  | 15 | 0.01096175 | 0.82449574 | 0.8270662  | 0.71225074 |
| cg22567585  | 15 | 0.0062619  | 0.40660813 | 0.4269752  | 0.26151918 |
| cg21952052  | 1  | 0.01236318 | 0.29615875 | 0.30106502 | 0.18753689 |
| cg02184226  | 17 | 0.0017447  | 0.76609448 | 0.69734203 | 0.56745864 |
| cg03623982  | 6  | 0.00194569 | 0.27898341 | 0.26274182 | 0.13993698 |
| cg10327067  | 8  | 0.00068559 | 0.43408955 | 0.32099297 | 0.17790176 |
| cg15134714  | 8  | 0.01842703 | 0.5115632  | 0.47373042 | 0.35789223 |
| cg03097134  | 6  | 0.00079224 | 0.56646495 | 0.46445481 | 0.33189703 |
| cg23521140  | 2  | 0.00230737 | 0.42599477 | 0.38083169 | 0.25486605 |
| cg02944084  | 17 | 0.00182655 | 0.5084155  | 0.51243897 | 0.36184073 |
| cg09063683  | 5  | 0.00938113 | 0.35704513 | 0.36292937 | 0.2462521  |
| cg18207999  | 17 | 0.00280561 | 0.52178961 | 0.52665175 | 0.27676107 |
| cg16163382  | 2  | 0.00713358 | 0.76220982 | 0.78978065 | 0.53540726 |
| cg19501909  | 22 | 0.00243597 | 0.28021714 | 0.25723891 | 0.15240503 |
| cg00760950  | 13 | 0.00109306 | 0.78716654 | 0.76358559 | 0.61614384 |
| cg08064488  | 21 | 0.00918003 | 0.67034296 | 0.76227118 | 0.55872729 |
| cg24459147  | 21 | 0.00202174 | 0.46269521 | 0.56341185 | 0.28306847 |
| cg09408917  | 21 | 0.01262374 | 0.62130435 | 0.69213921 | 0.40740113 |
| cg06368184  | 21 | 0.00805241 | 0.63310147 | 0.72094443 | 0.39328867 |
| cg02730156  | 21 | 0.00648231 | 0.40337586 | 0.4262434  | 0.25686257 |
| cg16404784  | 14 | 0.00450697 | 0.53057715 | 0.52030342 | 0.3826109  |
| cg07989851  | 15 | 0.02457877 | 0.69369153 | 0.74160805 | 0.57793802 |
| cg04316353  | 6  | 0.04013049 | 0.68927875 | 0.72560833 | 0.58225435 |
| cg19634252  | 4  | 0.00352201 | 0.53628245 | 0.49281705 | 0.38200634 |
| cg05191655  | 4  | 0.0157424  | 0.48692988 | 0.50507246 | 0.32411863 |
| cg03906681  | 15 | 0.0078763  | 0.7230758  | 0.69314618 | 0.53377705 |
| cg24802813  | 7  | 0.00426883 | 0.46464979 | 0.49406096 | 0.29476408 |
| cg16703420  | 14 | 0.00958397 | 0.44655419 | 0.37011489 | 0.26409964 |
| cg08986840  | 8  | 0.00622936 | 0.32212329 | 0.30252991 | 0.15600877 |
| cg11422851  | 8  | 0.00066204 | 0.90914419 | 0.82233642 | 0.69744528 |
| cg08037478  | 12 | 0.01137235 | 0.65752403 | 0.64898477 | 0.54020364 |

|            |    |            |            |            |            |
|------------|----|------------|------------|------------|------------|
| cg27109912 | 17 | 0.00072814 | 0.64404203 | 0.51475324 | 0.36327566 |
| cg26300517 | 4  | 0.00065949 | 0.90570827 | 0.84445691 | 0.73152072 |
| cg22588983 | 5  | 0.00107266 | 0.8076217  | 0.73186197 | 0.61494712 |
| cg27638284 | 20 | 0.0156946  | 0.54524345 | 0.55560293 | 0.31614006 |
| cg14118997 | 14 | 0.008876   | 0.32955604 | 0.36335363 | 0.22817692 |
| cg21949194 | 2  | 0.00595346 | 0.70025296 | 0.74264635 | 0.56056841 |
| cg18275589 | 5  | 0.01284723 | 0.369284   | 0.34471401 | 0.21879105 |
| cg26494138 | 2  | 0.02577962 | 0.64768014 | 0.71029932 | 0.53728766 |
| cg05005073 | 1  | 0.00295889 | 0.83233011 | 0.80154218 | 0.68162603 |
| cg25119946 | 17 | 0.00270728 | 0.89469712 | 0.87524723 | 0.74544435 |
| cg03453870 | 15 | 0.00074381 | 0.86607419 | 0.80602629 | 0.63374494 |
| cg09290175 | 22 | 0.00116059 | 0.93886566 | 0.913445   | 0.78379465 |
| cg25673591 | 17 | 0.00212345 | 0.61133565 | 0.55277714 | 0.41910944 |
| cg04804321 | 8  | 0.00798815 | 0.78679355 | 0.79776986 | 0.67312372 |
| cg09126279 | 4  | 0.03068939 | 0.67341625 | 0.73442213 | 0.52801722 |
| cg19684783 | 5  | 0.02944061 | 0.72952842 | 0.74245725 | 0.62718021 |
| cg14955976 | 11 | 0.0011469  | 0.2912029  | 0.31320839 | 0.16685621 |
| cg07138070 | 7  | 0.02240881 | 0.42314703 | 0.41113433 | 0.30235006 |
| cg06581409 | 19 | 0.00092849 | 0.64454593 | 0.55030019 | 0.41314054 |
| cg02624905 | 6  | 0.00858831 | 0.75221768 | 0.82622666 | 0.54881995 |
| cg24369185 | 6  | 0.0281492  | 0.78660538 | 0.79224532 | 0.68524629 |
| cg21052660 | 6  | 0.04791139 | 0.69301578 | 0.74855432 | 0.47993981 |
| cg17609158 | 6  | 0.02368354 | 0.70721657 | 0.7511086  | 0.48952379 |
| cg10274208 | 13 | 0.01718572 | 0.7486055  | 0.7406769  | 0.59886663 |
| cg26325867 | 6  | 0.00201167 | 0.50914152 | 0.49217973 | 0.28993088 |
| cg08655662 | 6  | 0.00081925 | 0.68774522 | 0.64785366 | 0.50458378 |
| cg20263901 | 6  | 0.00084118 | 0.43207028 | 0.37834302 | 0.25495469 |
| cg05234552 | 6  | 0.00147559 | 0.59372484 | 0.49420063 | 0.29755182 |
| cg20893203 | 6  | 0.00525399 | 0.49429712 | 0.46604512 | 0.24379415 |
| cg06484100 | 17 | 0.00103447 | 0.53633762 | 0.44300828 | 0.32240986 |
| cg02420480 | 7  | 0.00405622 | 0.76152889 | 0.75136669 | 0.49910486 |
| cg24202916 | 20 | 0.00132036 | 0.56847421 | 0.58613458 | 0.46702022 |
| cg24484352 | 17 | 0.01954678 | 0.66757662 | 0.76331102 | 0.54764276 |
| cg13057506 | 15 | 0.00335524 | 0.56263688 | 0.56278945 | 0.38990732 |
| cg04783450 | 6  | 0.00071044 | 0.763751   | 0.65629821 | 0.48308346 |
| cg09244312 | 13 | 0.00073118 | 0.81804523 | 0.72174477 | 0.50673956 |
| cg16230352 | 8  | 0.02828378 | 0.6558536  | 0.67487091 | 0.52894367 |
| cg21293933 | 20 | 0.00622936 | 0.54995867 | 0.53494105 | 0.42950922 |
| cg17367816 | 10 | 0.01616965 | 0.33199321 | 0.32900112 | 0.22820123 |
| cg07339138 | 3  | 0.0009934  | 0.82065546 | 0.78863594 | 0.63323243 |
| cg07749597 | 5  | 0.01244196 | 0.76718447 | 0.76389052 | 0.61528566 |
| cg14697657 | 5  | 0.00212575 | 0.23076515 | 0.24700102 | 0.12548469 |
| cg18739675 | 2  | 0.02190777 | 0.80166804 | 0.85429411 | 0.70043746 |
| cg21567649 | 2  | 0.01245683 | 0.41269683 | 0.42941292 | 0.30349263 |
| cg18257574 | 2  | 0.0008947  | 0.44607594 | 0.37903798 | 0.20240758 |
| cg14718363 | 2  | 0.02122541 | 0.60115559 | 0.61496796 | 0.45769958 |

|            |    |            |            |            |            |
|------------|----|------------|------------|------------|------------|
| cg14675881 | 2  | 0.01212811 | 0.68554059 | 0.77412887 | 0.5805051  |
| cg00568910 | 1  | 0.02917135 | 0.73736424 | 0.75493664 | 0.59313427 |
| cg20788482 | 22 | 0.03257065 | 0.63365108 | 0.62800313 | 0.49898389 |
| cg03143046 | 6  | 0.00908203 | 0.39944996 | 0.32622271 | 0.21844046 |
| cg16540590 | 5  | 0.01640621 | 0.7292954  | 0.70834732 | 0.60190557 |
| cg15142335 | 1  | 0.00354163 | 0.78606136 | 0.78405566 | 0.57113152 |
| cg18403852 | 21 | 0.00136593 | 0.70137526 | 0.63038638 | 0.52462258 |
| cg12670123 | 10 | 0.01021896 | 0.41086399 | 0.50094849 | 0.28665086 |
| cg07121693 | 10 | 0.00218799 | 0.48073165 | 0.46325461 | 0.33745308 |
| cg26606789 | 21 | 0.00461206 | 0.26032269 | 0.27576909 | 0.15348158 |
| cg02698668 | 19 | 0.00100759 | 0.39649571 | 0.29987587 | 0.16626302 |
| cg02059176 | 2  | 0.00275824 | 0.7157742  | 0.7118549  | 0.43726427 |
| cg02068486 | 6  | 0.01310065 | 0.73975265 | 0.71603866 | 0.61009744 |
| cg01482969 | 11 | 0.03891003 | 0.33785341 | 0.38180281 | 0.23336315 |
| cg13979708 | 6  | 0.03857163 | 0.66805263 | 0.68106662 | 0.54193827 |
| cg04781339 | 21 | 0.01334584 | 0.47265498 | 0.52127319 | 0.3472987  |
| cg18703515 | 10 | 0.00106594 | 0.80080198 | 0.77995576 | 0.67251394 |
| cg12111500 | 21 | 0.02310662 | 0.77970303 | 0.73232842 | 0.59888067 |
| cg13413982 | 13 | 0.00971274 | 0.87541116 | 0.8746338  | 0.76617444 |
| cg00362657 | 21 | 0.0423854  | 0.54982742 | 0.59110854 | 0.42609375 |
| cg26203328 | 15 | 0.00174123 | 0.40483633 | 0.41058659 | 0.19818347 |
| cg15006828 | 20 | 0.00174783 | 0.39564856 | 0.37789015 | 0.24117233 |
| cg07780762 | 1  | 0.00073378 | 0.52411545 | 0.47749168 | 0.33163776 |
| cg22912834 | 2  | 0.01607325 | 0.74743623 | 0.83691954 | 0.62306518 |
| cg10068996 | 2  | 0.02284505 | 0.8096165  | 0.84393278 | 0.69633824 |
| cg13207733 | 7  | 0.0058315  | 0.57672963 | 0.56392232 | 0.39745603 |
| cg10281509 | 2  | 0.01678444 | 0.5369822  | 0.58918522 | 0.39948093 |
| cg06798115 | 3  | 0.00344958 | 0.59796953 | 0.5532349  | 0.4221789  |
| cg21981144 | 19 | 0.00068904 | 0.42655227 | 0.37126338 | 0.26488959 |
| cg26587014 | 19 | 0.00708587 | 0.67793527 | 0.67137293 | 0.56681074 |
| cg05168229 | 13 | 0.00216509 | 0.46047859 | 0.48044263 | 0.27014528 |
| cg13496662 | 19 | 0.02473841 | 0.56706194 | 0.55281328 | 0.43730004 |
| cg06739525 | 2  | 0.00299664 | 0.87854844 | 0.86312274 | 0.75511692 |
| cg05091585 | 13 | 0.00142756 | 0.57622914 | 0.50972544 | 0.40191596 |
| cg13076829 | 18 | 0.00073265 | 0.56041986 | 0.42199555 | 0.32150452 |
| cg01632562 | 6  | 0.02215534 | 0.77588627 | 0.7761938  | 0.64119356 |
| cg23425762 | 18 | 0.00501039 | 0.6460605  | 0.53031858 | 0.40591557 |
| cg15835542 | 6  | 0.02002988 | 0.24883892 | 0.24306992 | 0.13975066 |
| cg26904260 | 11 | 0.03692847 | 0.43622981 | 0.44359752 | 0.31434926 |
| cg17527177 | 17 | 0.03346286 | 0.68472576 | 0.72332618 | 0.55677954 |
| cg10521147 | 13 | 0.00655853 | 0.34635932 | 0.37703677 | 0.22362202 |
| cg19061690 | 17 | 0.01038666 | 0.35840972 | 0.39995148 | 0.24074404 |
| cg24954967 | 3  | 0.01011462 | 0.83500919 | 0.84043663 | 0.6805665  |
| cg02352281 | 3  | 0.0012504  | 0.74644739 | 0.72309209 | 0.48156379 |
| cg27609217 | 11 | 0.03342972 | 0.64129917 | 0.63881283 | 0.45946027 |
| cg01514353 | 22 | 0.00857669 | 0.43717657 | 0.46193193 | 0.31770776 |

|            |    |            |            |            |            |
|------------|----|------------|------------|------------|------------|
| cg19916740 | 22 | 0.01794611 | 0.63382513 | 0.62115046 | 0.49469186 |
| cg01993552 | 19 | 0.00073918 | 0.70087966 | 0.57353681 | 0.45626725 |
| cg25255850 | 17 | 0.0051141  | 0.49523086 | 0.50404779 | 0.33974114 |
| cg05322273 | 1  | 0.00937465 | 0.59917603 | 0.72497903 | 0.4858465  |
| cg14686297 | 22 | 0.00751269 | 0.63053123 | 0.63327778 | 0.44357207 |
| cg25636466 | 6  | 0.03778772 | 0.66450791 | 0.69915761 | 0.53390779 |
| cg22005990 | 17 | 0.01096356 | 0.52692828 | 0.51323637 | 0.35842316 |
| cg21082028 | 17 | 0.00297384 | 0.75862888 | 0.73169634 | 0.58138115 |
| cg02311193 | 17 | 0.00516729 | 0.68680368 | 0.63601059 | 0.42464925 |
| cg03666350 | 2  | 0.00065949 | 0.70574866 | 0.52357892 | 0.40867901 |
| cg22266211 | 17 | 0.00499799 | 0.30175808 | 0.28801959 | 0.18763556 |
| cg12131828 | 17 | 0.001181   | 0.27393407 | 0.26672906 | 0.14853045 |
| cg03064100 | 2  | 0.01668465 | 0.66678791 | 0.63028343 | 0.52179268 |
| cg16097858 | 2  | 0.0191912  | 0.56027118 | 0.62541142 | 0.40431772 |
| cg08381504 | 3  | 0.02870038 | 0.7598738  | 0.79789601 | 0.60551807 |
| cg09571950 | 3  | 0.04213177 | 0.75048352 | 0.78742414 | 0.60294039 |
| cg15321306 | 12 | 0.00092661 | 0.9018846  | 0.87140452 | 0.70973589 |
| cg18645361 | 20 | 0.00100011 | 0.8895346  | 0.84706753 | 0.7458039  |
| cg25983901 | 7  | 0.00155276 | 0.75413198 | 0.65985652 | 0.52631775 |
| cg17411016 | 2  | 0.00142756 | 0.47937457 | 0.41808225 | 0.2489875  |
| cg13097800 | 14 | 0.00118952 | 0.59529433 | 0.61771573 | 0.47599566 |
| cg03273315 | 8  | 0.0036184  | 0.47234171 | 0.4448262  | 0.31807649 |
| cg09455881 | 3  | 0.03208512 | 0.63623901 | 0.70292754 | 0.51069175 |
| cg27305917 | 21 | 0.01666517 | 0.58165413 | 0.56961112 | 0.46186878 |
| cg10511890 | 11 | 0.00806542 | 0.70462675 | 0.722534   | 0.55051924 |
| cg13912307 | 11 | 0.00248044 | 0.67314722 | 0.65853767 | 0.50772346 |
| cg25439798 | 21 | 0.00065949 | 0.90755023 | 0.81929824 | 0.68112149 |
| cg15317049 | 21 | 0.00079512 | 0.78777643 | 0.73970937 | 0.49132443 |
| cg12457659 | 21 | 0.00073378 | 0.64024193 | 0.5468442  | 0.36837146 |
| cg03147815 | 21 | 0.01357235 | 0.72646499 | 0.70499297 | 0.59424152 |
| cg22786667 | 7  | 0.02310117 | 0.78196026 | 0.80307665 | 0.62650253 |
| cg01423916 | 11 | 0.00758361 | 0.72382138 | 0.74463577 | 0.56883357 |
| cg15657641 | 11 | 0.00332266 | 0.36539274 | 0.36711001 | 0.21920314 |
| cg22538557 | 19 | 0.01313275 | 0.61062454 | 0.65498432 | 0.50092705 |
| cg09140531 | 6  | 0.00518187 | 0.67825976 | 0.73738429 | 0.51281549 |
| cg14398113 | 15 | 0.0355165  | 0.75708989 | 0.77593642 | 0.63012297 |
| cg18655633 | 19 | 0.01074556 | 0.74600173 | 0.73332395 | 0.61337498 |
| cg14241836 | 7  | 0.00083771 | 0.88654214 | 0.86034094 | 0.65058264 |
| cg23981172 | 14 | 0.03021634 | 0.40813971 | 0.38990626 | 0.289421   |
| cg02134839 | 17 | 0.00238047 | 0.72188968 | 0.69054034 | 0.54830301 |
| cg21286117 | 17 | 0.00066232 | 0.85407003 | 0.77717764 | 0.66785189 |
| cg25616869 | 3  | 0.00065949 | 0.61430802 | 0.4746052  | 0.36720886 |
| cg09889228 | 16 | 0.00502478 | 0.60897477 | 0.63689824 | 0.44010623 |
| cg08871545 | 1  | 0.00299125 | 0.56939204 | 0.63629809 | 0.38863728 |
| cg13772700 | 22 | 0.00112793 | 0.53582553 | 0.49218972 | 0.38887359 |
| cg04149776 | 22 | 0.0157632  | 0.72442413 | 0.72711213 | 0.60525406 |

|            |    |            |            |            |            |
|------------|----|------------|------------|------------|------------|
| cg09341796 | 22 | 0.00216343 | 0.62880973 | 0.58674011 | 0.48622619 |
| cg00253248 | 17 | 0.03743475 | 0.66180351 | 0.68702109 | 0.54729311 |
| cg21393124 | 17 | 0.00147559 | 0.70765712 | 0.64722642 | 0.52092947 |
| cg01955492 | 6  | 0.01223489 | 0.39999754 | 0.41111367 | 0.2833285  |
| cg15471388 | 14 | 0.00581095 | 0.83005774 | 0.8248807  | 0.71944352 |
| cg23391288 | 13 | 0.00074016 | 0.89537003 | 0.85445115 | 0.68186656 |
| cg03421236 | 16 | 0.04976146 | 0.49886044 | 0.5241701  | 0.39813662 |
| cg07586760 | 22 | 0.00414201 | 0.6078794  | 0.57690073 | 0.46631523 |
| cg27166177 | 22 | 0.00103895 | 0.40232893 | 0.40868401 | 0.26053065 |
| cg10828561 | 8  | 0.00077454 | 0.71983946 | 0.66420365 | 0.52599046 |
| cg11905324 | 8  | 0.00067859 | 0.90481832 | 0.84766349 | 0.723377   |
| cg23462772 | 10 | 0.00947108 | 0.57887461 | 0.55819974 | 0.32191936 |
| cg05729745 | 22 | 0.00218799 | 0.60988914 | 0.59411198 | 0.48199164 |
| cg00657780 | 16 | 0.00066204 | 0.78395489 | 0.70016694 | 0.49796202 |
| cg26706803 | 16 | 0.0097835  | 0.29929713 | 0.2760085  | 0.1668045  |
| cg20031845 | 7  | 0.00911882 | 0.74197817 | 0.78442225 | 0.55955703 |
| cg19604907 | 12 | 0.00403008 | 0.32627847 | 0.28518354 | 0.17607623 |
| cg10238080 | 12 | 0.03276765 | 0.65625644 | 0.66082121 | 0.52747085 |
| cg26277754 | 5  | 0.02326722 | 0.57019243 | 0.52488191 | 0.39718984 |
| cg24549912 | 5  | 0.00262867 | 0.50553609 | 0.47198541 | 0.27769656 |
| cg09524946 | 13 | 0.00670577 | 0.29442201 | 0.29522951 | 0.17889184 |
| cg07121900 | 13 | 0.04648826 | 0.47236614 | 0.47733242 | 0.36767158 |
| cg01955153 | 16 | 0.03744929 | 0.61947211 | 0.63691646 | 0.51927958 |
| cg18530299 | 8  | 0.00755255 | 0.40828114 | 0.40019252 | 0.27135593 |
| cg07807757 | 7  | 0.00219431 | 0.75674611 | 0.69394856 | 0.49471606 |
| cg03663556 | 7  | 0.00471011 | 0.44140785 | 0.40641357 | 0.20862287 |
| cg21140898 | 1  | 0.01630619 | 0.55296424 | 0.55381973 | 0.43983538 |
| cg08981669 | 7  | 0.00489082 | 0.67013924 | 0.74667845 | 0.54586685 |
| cg21814178 | 12 | 0.00356822 | 0.45069399 | 0.46218044 | 0.25805779 |
| cg00092400 | 12 | 0.02250121 | 0.72183706 | 0.73047079 | 0.53572055 |
| cg22540135 | 19 | 0.01613093 | 0.69877936 | 0.68884983 | 0.48706299 |
| cg02964087 | 16 | 0.00961487 | 0.61285941 | 0.58687819 | 0.48639693 |
| cg24674269 | 13 | 0.01011462 | 0.73639899 | 0.76903725 | 0.5709099  |
| cg11551296 | 20 | 0.01423002 | 0.32975133 | 0.3707685  | 0.20058748 |
| cg09225373 | 6  | 0.0042005  | 0.33976164 | 0.37243334 | 0.2110764  |
| cg23591955 | 14 | 0.0097835  | 0.46076685 | 0.45235915 | 0.29722485 |
| cg17403995 | 1  | 0.01210192 | 0.72209525 | 0.71854543 | 0.61407899 |
| cg12071775 | 14 | 0.0011159  | 0.38382774 | 0.35460121 | 0.19880704 |
| cg15964159 | 13 | 0.00527173 | 0.81905911 | 0.8098243  | 0.69908195 |
| cg00063982 | 1  | 0.0015244  | 0.89511493 | 0.87423533 | 0.73444193 |
| cg04373760 | 16 | 0.04904378 | 0.38242667 | 0.40054489 | 0.26904969 |
| cg04071967 | 17 | 0.00639169 | 0.51713458 | 0.5489558  | 0.36551391 |
| cg12008054 | 13 | 0.02002893 | 0.73549076 | 0.70887168 | 0.60875112 |
| cg06049381 | 17 | 0.03358212 | 0.34546552 | 0.34898584 | 0.23235552 |
| cg07559178 | 14 | 0.00074381 | 0.73407195 | 0.61568393 | 0.46427941 |
| cg11721349 | 6  | 0.00081789 | 0.4014543  | 0.29342157 | 0.15573252 |



|            |    |            |            |            |            |
|------------|----|------------|------------|------------|------------|
| cg12790424 | 14 | 0.00168532 | 0.70455887 | 0.68210246 | 0.48275936 |
| cg12534147 | 5  | 0.00306394 | 0.56488451 | 0.50161417 | 0.27969155 |
| cg16523850 | 6  | 0.02530038 | 0.47781843 | 0.40698109 | 0.30694959 |
| cg22021794 | 5  | 0.00065949 | 0.84252915 | 0.69472317 | 0.55029285 |
| cg10809166 | 12 | 0.01807343 | 0.63599787 | 0.67833213 | 0.49120739 |
| cg07972716 | 20 | 0.00240097 | 0.50104476 | 0.43793425 | 0.32754276 |
| cg10129391 | 4  | 0.00910614 | 0.54735776 | 0.54854447 | 0.35496168 |
| cg14430614 | 13 | 0.00139783 | 0.82429269 | 0.78857768 | 0.68427667 |
| cg04231042 | 4  | 0.00092849 | 0.89325289 | 0.8373002  | 0.73604254 |
| cg00187120 | 7  | 0.01109894 | 0.54646899 | 0.51426088 | 0.41358652 |
| cg22341513 | 18 | 0.0020873  | 0.52852863 | 0.52312597 | 0.3821626  |
| cg02388378 | 16 | 0.00384078 | 0.74871133 | 0.74412944 | 0.57880894 |
| cg01961105 | 16 | 0.00514    | 0.78786143 | 0.77647253 | 0.6097175  |
| cg07505018 | 16 | 0.00207334 | 0.70370275 | 0.6677371  | 0.51494856 |
| cg07455757 | 16 | 0.00315261 | 0.69592465 | 0.66308215 | 0.53062991 |
| cg06993307 | 16 | 0.00334886 | 0.49229175 | 0.44621578 | 0.24400504 |
| cg27327911 | 16 | 0.00218597 | 0.28675155 | 0.27922241 | 0.17352119 |
| cg15916160 | 16 | 0.03100155 | 0.54382391 | 0.56878834 | 0.36204853 |
| cg08454455 | 16 | 0.00315265 | 0.63555733 | 0.61138718 | 0.48203539 |
| cg01047631 | 16 | 0.00207996 | 0.68300258 | 0.66140552 | 0.46409229 |
| cg13744172 | 16 | 0.00168732 | 0.69492583 | 0.66904608 | 0.30877303 |
| cg00747944 | 16 | 0.00243597 | 0.66402869 | 0.62596903 | 0.34726276 |
| cg10214640 | 16 | 0.00171661 | 0.81938831 | 0.76065321 | 0.546938   |
| cg06138439 | 16 | 0.00275412 | 0.7263199  | 0.69797246 | 0.44661548 |
| cg16387593 | 16 | 0.00454901 | 0.73454631 | 0.71281442 | 0.49245516 |
| cg07271394 | 16 | 0.0048897  | 0.50703481 | 0.52134214 | 0.36291079 |
| cg08732659 | 16 | 0.00576931 | 0.67307838 | 0.68257659 | 0.56584258 |
| cg27577928 | 4  | 0.01463398 | 0.71878218 | 0.82023475 | 0.55586998 |
| cg11332163 | 4  | 0.02244742 | 0.69901202 | 0.79634857 | 0.5520282  |
| cg03709475 | 5  | 0.00320723 | 0.45400591 | 0.43864004 | 0.2352011  |
| cg05616589 | 6  | 0.00110772 | 0.64070802 | 0.68458938 | 0.43193031 |
| cg21620078 | 5  | 0.00186306 | 0.72212216 | 0.68562119 | 0.57844101 |
| cg15742777 | 2  | 0.00487756 | 0.48560289 | 0.51886055 | 0.27133647 |
| cg05403316 | 2  | 0.00711398 | 0.71389637 | 0.70470183 | 0.50182878 |
| cg14553705 | 5  | 0.04292124 | 0.58908551 | 0.64837495 | 0.47081633 |
| cg05267204 | 2  | 0.00967401 | 0.43666216 | 0.46892417 | 0.29318928 |
| cg25750209 | 2  | 0.00092849 | 0.84533335 | 0.80253194 | 0.68543246 |
| cg02670637 | 1  | 0.00957502 | 0.71239735 | 0.6628502  | 0.53497683 |
| cg25537245 | 17 | 0.00332266 | 0.53903907 | 0.54376385 | 0.35770932 |
| cg06551697 | 17 | 0.00830906 | 0.81993103 | 0.82861892 | 0.68765057 |
| cg23408558 | 5  | 0.00341332 | 0.34591508 | 0.41784556 | 0.22925176 |
| cg16426215 | 16 | 0.02911369 | 0.52641974 | 0.55185146 | 0.4070417  |
| cg06821992 | 5  | 0.00679223 | 0.48792571 | 0.61214184 | 0.38212327 |
| cg13670898 | 14 | 0.00262147 | 0.65173398 | 0.62286891 | 0.47066796 |
| cg08415582 | 8  | 0.00520958 | 0.64289233 | 0.64478032 | 0.53823826 |
| cg26236329 | 11 | 0.00779924 | 0.75226354 | 0.75654954 | 0.50730219 |

|            |    |            |            |            |            |
|------------|----|------------|------------|------------|------------|
| cg06627087 | 19 | 0.02562377 | 0.78594458 | 0.85384979 | 0.63604886 |
| cg07980854 | 20 | 0.00082513 | 0.58176034 | 0.50910042 | 0.32593895 |
| cg06815411 | 4  | 0.00305182 | 0.23838102 | 0.28472766 | 0.13448588 |
| cg11895596 | 3  | 0.0009078  | 0.80736549 | 0.76148731 | 0.64143963 |
| cg03500164 | 17 | 0.00886166 | 0.83051626 | 0.8158308  | 0.70541082 |
| cg11718312 | 6  | 0.01430792 | 0.37933478 | 0.39178914 | 0.27752286 |
| cg09726198 | 3  | 0.00341932 | 0.52202641 | 0.46109959 | 0.32764408 |
| cg23634401 | 15 | 0.04997855 | 0.54534278 | 0.59184193 | 0.44436006 |
| cg11661534 | 3  | 0.00687165 | 0.34737878 | 0.32974303 | 0.21732759 |
| cg24499677 | 17 | 0.00217555 | 0.69549714 | 0.64497164 | 0.5397636  |
| cg10416784 | 2  | 0.00156239 | 0.53551121 | 0.48059211 | 0.35376943 |
| cg01360605 | 20 | 0.01249982 | 0.44705043 | 0.44506483 | 0.30743332 |
| cg12207248 | 3  | 0.02078916 | 0.56803628 | 0.56928928 | 0.43942688 |
| cg13432945 | 1  | 0.0009028  | 0.68973566 | 0.66823324 | 0.48796663 |
| cg01556275 | 1  | 0.00169556 | 0.84387477 | 0.78402033 | 0.6807496  |
| cg11586930 | 1  | 0.00074016 | 0.83688099 | 0.75829893 | 0.62776694 |
| cg02691192 | 17 | 0.00372456 | 0.51352273 | 0.49718806 | 0.27668025 |
| cg25766247 | 8  | 0.00364279 | 0.7834151  | 0.78580885 | 0.53313598 |
| cg21493768 | 14 | 0.00223213 | 0.60980397 | 0.66393098 | 0.39476717 |
| cg05995607 | 11 | 0.00211742 | 0.31745022 | 0.37431897 | 0.18320713 |
| cg26915329 | 13 | 0.00155166 | 0.4588738  | 0.46031407 | 0.31208467 |
| cg10589330 | 15 | 0.00153162 | 0.79536093 | 0.7619264  | 0.65186297 |
| cg07486821 | 16 | 0.00192049 | 0.61523898 | 0.58178629 | 0.46883909 |
| cg26124526 | 5  | 0.00462871 | 0.65091575 | 0.63055968 | 0.49799947 |
| cg26930006 | 14 | 0.00548311 | 0.35391433 | 0.39229066 | 0.22187516 |
| cg20321319 | 8  | 0.00669355 | 0.41876286 | 0.41319876 | 0.31273512 |
| cg03032497 | 14 | 0.00937895 | 0.5788785  | 0.57771937 | 0.44328443 |
| cg08082810 | 14 | 0.03190657 | 0.75718918 | 0.77586858 | 0.63061811 |
| cg19610529 | 14 | 0.01064534 | 0.72289003 | 0.72771041 | 0.60236739 |
| cg02320543 | 14 | 0.00664361 | 0.42924944 | 0.44811995 | 0.26770582 |
| cg18103859 | 14 | 0.00822746 | 0.66512768 | 0.69524449 | 0.49675648 |
| cg26236177 | 14 | 0.00803433 | 0.527201   | 0.55381961 | 0.32729026 |
| cg12818596 | 14 | 0.02944061 | 0.49220583 | 0.55143714 | 0.38542264 |
| cg21177821 | 14 | 0.04319217 | 0.7059969  | 0.71077407 | 0.58059098 |
| cg04166812 | 14 | 0.00323448 | 0.77204485 | 0.78994129 | 0.56676015 |
| cg10858480 | 14 | 0.01015119 | 0.723774   | 0.72388075 | 0.61724875 |
| cg15540602 | 14 | 0.01145563 | 0.65592197 | 0.63451284 | 0.43598668 |
| cg05854694 | 14 | 0.01495982 | 0.74628436 | 0.77279208 | 0.61216786 |
| cg23512231 | 17 | 0.01501879 | 0.63067937 | 0.56897821 | 0.46659733 |
| cg24753988 | 14 | 0.00168532 | 0.66953428 | 0.63020457 | 0.48876671 |
| cg14272084 | 14 | 0.00184462 | 0.59785894 | 0.55450017 | 0.39261936 |
| cg06011086 | 8  | 0.00540086 | 0.581363   | 0.61694657 | 0.41637839 |
| cg17922998 | 8  | 0.00219764 | 0.79470402 | 0.7654948  | 0.50081272 |
| cg12171761 | 8  | 0.01026031 | 0.59193348 | 0.59920577 | 0.48575132 |
| cg01279413 | 20 | 0.01059488 | 0.47444913 | 0.45061735 | 0.3335918  |
| cg19532942 | 14 | 0.000777   | 0.61750512 | 0.49205638 | 0.37056093 |

|            |    |            |            |            |            |
|------------|----|------------|------------|------------|------------|
| cg18728780 | 14 | 0.00531242 | 0.544971   | 0.56385771 | 0.37428205 |
| cg11633080 | 7  | 0.01237894 | 0.67116008 | 0.67132269 | 0.56172194 |
| cg06520521 | 11 | 0.00195549 | 0.27448195 | 0.24611487 | 0.13945012 |
| cg01719405 | 14 | 0.00353532 | 0.63911732 | 0.62736659 | 0.40899762 |
| cg21568661 | 15 | 0.01580869 | 0.4822723  | 0.4896593  | 0.28793299 |
| cg10600730 | 20 | 0.00076471 | 0.77265906 | 0.67791771 | 0.52933764 |
| cg18995788 | 8  | 0.00102765 | 0.83003963 | 0.80575216 | 0.65317243 |
| cg15835664 | 1  | 0.00065949 | 0.58746879 | 0.4609275  | 0.32606754 |
| cg19169932 | 15 | 0.00223317 | 0.81828606 | 0.81494148 | 0.64882774 |
| cg22005336 | 5  | 0.02835259 | 0.38501893 | 0.41112524 | 0.27023716 |
| cg04770088 | 17 | 0.0169634  | 0.65481927 | 0.70133679 | 0.54431338 |
| cg17415265 | 17 | 0.0035378  | 0.61407045 | 0.66656714 | 0.43247453 |
| cg03741862 | 17 | 0.00798815 | 0.29190186 | 0.33320319 | 0.16641443 |
| cg06178669 | 11 | 0.01744696 | 0.56438213 | 0.56983172 | 0.43444171 |
| cg19064304 | 15 | 0.00844494 | 0.75675991 | 0.72421811 | 0.62188097 |
| cg13617812 | 15 | 0.01154548 | 0.55213061 | 0.54505199 | 0.42212014 |
| cg26971423 | 15 | 0.00299664 | 0.76767424 | 0.67752417 | 0.54022218 |
| cg22046201 | 1  | 0.00857669 | 0.63185148 | 0.61728075 | 0.40540579 |
| cg04462931 | 7  | 0.01373528 | 0.81632374 | 0.82041405 | 0.54471688 |
| cg07264203 | 3  | 0.00774408 | 0.73392642 | 0.81312879 | 0.62859423 |
| cg14016418 | 2  | 0.00514311 | 0.40149617 | 0.33311151 | 0.2198505  |
| cg24710503 | 11 | 0.00184462 | 0.83393654 | 0.80279765 | 0.66639699 |
| cg18926409 | 15 | 0.00623289 | 0.75918458 | 0.7409886  | 0.56497249 |
| cg07076836 | 15 | 0.01317021 | 0.80117866 | 0.7850651  | 0.64661884 |
| cg20889322 | 11 | 0.00336153 | 0.46359805 | 0.4681863  | 0.30139284 |
| cg07029024 | 11 | 0.02075286 | 0.58392671 | 0.55681617 | 0.4210208  |
| cg05471881 | 13 | 0.00129968 | 0.6300973  | 0.66724021 | 0.4903671  |
| cg07735220 | 2  | 0.0103127  | 0.3572173  | 0.3470316  | 0.22322903 |
| cg18129996 | 7  | 0.00101054 | 0.90354108 | 0.88885834 | 0.76465361 |
| cg21221767 | 14 | 0.00551242 | 0.76929918 | 0.72744887 | 0.57648847 |
| cg16204717 | 12 | 0.0026461  | 0.46877899 | 0.4532738  | 0.30347322 |
| cg23207542 | 2  | 0.00520163 | 0.63992959 | 0.63485403 | 0.51891472 |
| cg00802386 | 7  | 0.00186737 | 0.87310642 | 0.84696224 | 0.73693747 |
| cg04111102 | 1  | 0.00725151 | 0.64326463 | 0.69178085 | 0.5005676  |
| cg08098420 | 16 | 0.00666111 | 0.38401632 | 0.33335338 | 0.22758478 |
| cg12078913 | 13 | 0.00521564 | 0.54413919 | 0.54652052 | 0.44166927 |
| cg27381488 | 16 | 0.00285259 | 0.38779768 | 0.37558465 | 0.21782359 |
| cg08237521 | 16 | 0.00160451 | 0.81290607 | 0.81415904 | 0.70530655 |
| cg10723431 | 14 | 0.01891102 | 0.66800781 | 0.69029343 | 0.5443852  |
| cg07143815 | 8  | 0.00485266 | 0.32396821 | 0.34508592 | 0.21225324 |
| cg16663891 | 3  | 0.00563693 | 0.63771392 | 0.68650585 | 0.38401826 |
| cg09693588 | 3  | 0.00099274 | 0.85502151 | 0.82281593 | 0.71385565 |
| cg05068866 | 3  | 0.00614711 | 0.77917262 | 0.76560041 | 0.61307387 |
| cg14630001 | 3  | 0.00181303 | 0.58344926 | 0.60568336 | 0.46279781 |
| cg13851508 | 2  | 0.00589429 | 0.82848797 | 0.7803218  | 0.67039805 |
| cg10552446 | 2  | 0.00319723 | 0.61874783 | 0.69111282 | 0.44405863 |

|            |    |            |            |            |            |
|------------|----|------------|------------|------------|------------|
| cg08217163 | 2  | 0.00255186 | 0.7111275  | 0.7033405  | 0.55693363 |
| cg11241663 | 2  | 0.00857669 | 0.57347737 | 0.59723084 | 0.39911714 |
| cg01020413 | 2  | 0.00209427 | 0.7147919  | 0.74271611 | 0.55498445 |
| cg01721569 | 2  | 0.00276743 | 0.68207189 | 0.69956565 | 0.51793609 |
| cg02676167 | 2  | 0.00296953 | 0.62851487 | 0.68446011 | 0.40580945 |
| cg08850641 | 17 | 0.00674191 | 0.40924534 | 0.36889424 | 0.26497287 |
| cg23089445 | 8  | 0.00696373 | 0.52217413 | 0.53948849 | 0.40632861 |
| cg19111408 | 15 | 0.0099603  | 0.49966761 | 0.53432065 | 0.37756853 |
| cg19440115 | 15 | 0.00065949 | 0.68891268 | 0.60091766 | 0.49069367 |
| cg18762500 | 6  | 0.00184894 | 0.50935215 | 0.53522833 | 0.38741334 |
| cg04033732 | 16 | 0.00243597 | 0.30978487 | 0.29173964 | 0.18428936 |
| cg00176043 | 1  | 0.00414415 | 0.43947895 | 0.37849135 | 0.26247585 |
| cg26426334 | 1  | 0.00126804 | 0.56963232 | 0.47960136 | 0.34339384 |
| cg03188000 | 12 | 0.01032661 | 0.6468426  | 0.61580501 | 0.45272896 |
| cg19476334 | 12 | 0.00079512 | 0.80929294 | 0.78394683 | 0.64627421 |
| cg22540040 | 12 | 0.03710592 | 0.48673234 | 0.52310299 | 0.38275569 |
| cg20972199 | 11 | 0.00670817 | 0.65389956 | 0.64070077 | 0.45525072 |
| cg17418276 | 11 | 0.00129968 | 0.68282011 | 0.64156978 | 0.41528819 |
| cg24292665 | 11 | 0.0035878  | 0.43657317 | 0.43431678 | 0.26680914 |
| cg24610561 | 11 | 0.03377212 | 0.744068   | 0.8024347  | 0.64296642 |
| cg19616339 | 2  | 0.00181052 | 0.72059466 | 0.66946801 | 0.49787579 |
| cg24178897 | 14 | 0.00081925 | 0.6080414  | 0.55189967 | 0.33899464 |
| cg26540315 | 11 | 0.00830789 | 0.74323835 | 0.77013181 | 0.61326047 |
| cg17064090 | 11 | 0.02252087 | 0.53237957 | 0.55124858 | 0.40918489 |
| cg04718050 | 14 | 0.0013706  | 0.57189903 | 0.54033965 | 0.33237997 |
| cg10791884 | 8  | 0.0016785  | 0.84098389 | 0.85099808 | 0.71682576 |
| cg08422793 | 15 | 0.00796332 | 0.69555826 | 0.71103702 | 0.45046621 |
| cg20175702 | 15 | 0.04006803 | 0.39135581 | 0.35302501 | 0.22125696 |
| cg15705813 | 2  | 0.03354729 | 0.52868219 | 0.52899455 | 0.37682817 |
| cg26248066 | 11 | 0.01541137 | 0.65506408 | 0.57076695 | 0.45283871 |
| cg24680415 | 17 | 0.00076471 | 0.83881521 | 0.74445298 | 0.64096471 |
| cg03261725 | 17 | 0.00177922 | 0.72504582 | 0.69992955 | 0.55977727 |
| cg24796998 | 17 | 0.00480767 | 0.35995391 | 0.32564227 | 0.2139173  |
| cg09362047 | 17 | 0.00073118 | 0.8982764  | 0.81465629 | 0.69429476 |
| cg01957897 | 15 | 0.00065949 | 0.74359222 | 0.60116057 | 0.47028937 |
| cg27492584 | 17 | 0.00947108 | 0.51460961 | 0.44094354 | 0.29091189 |
| cg26962618 | 15 | 0.00252483 | 0.75368622 | 0.72703638 | 0.5625639  |
| cg14434062 | 15 | 0.00315582 | 0.70296894 | 0.66168399 | 0.37318525 |
| cg16973527 | 15 | 0.00221513 | 0.62153265 | 0.54833536 | 0.2829208  |
| cg13427748 | 15 | 0.00384078 | 0.57719084 | 0.56158318 | 0.34532827 |
| cg03278514 | 15 | 0.00107365 | 0.80234361 | 0.71704207 | 0.45742894 |
| cg24405567 | 15 | 0.00631167 | 0.76228239 | 0.79707381 | 0.55615732 |
| cg03108347 | 11 | 0.03608849 | 0.77223628 | 0.81233669 | 0.66978015 |
| cg04380269 | 2  | 0.01488167 | 0.65931538 | 0.65699365 | 0.53656025 |
| cg20391220 | 15 | 0.01910705 | 0.78810226 | 0.80787902 | 0.68059537 |
| cg23153661 | 2  | 0.01562094 | 0.57676811 | 0.56431835 | 0.44560668 |

|            |    |            |            |            |            |
|------------|----|------------|------------|------------|------------|
| cg23883632 | 14 | 0.00315582 | 0.70016638 | 0.66486513 | 0.40898781 |
| cg24611351 | 2  | 0.01558325 | 0.55413951 | 0.55565016 | 0.44424379 |
| cg20928238 | 14 | 0.00971058 | 0.46621373 | 0.47671891 | 0.36358187 |
| cg01816783 | 11 | 0.00112038 | 0.42079517 | 0.46520916 | 0.28727924 |
| cg27409484 | 6  | 0.00930663 | 0.37056738 | 0.4068087  | 0.2303323  |
| cg09478002 | 2  | 0.00077739 | 0.38105983 | 0.29254201 | 0.17323992 |
| cg02001991 | 4  | 0.00220384 | 0.58605763 | 0.60582706 | 0.3242069  |
| cg02235918 | 6  | 0.00112152 | 0.82798164 | 0.7283427  | 0.56466999 |
| cg26094232 | 11 | 0.0062669  | 0.27564337 | 0.28074643 | 0.16110322 |
| cg00206507 | 6  | 0.00335524 | 0.65417833 | 0.69634885 | 0.48970418 |
| cg06498232 | 3  | 0.00279686 | 0.24182039 | 0.255768   | 0.13839388 |
| cg10598503 | 3  | 0.00201346 | 0.78827423 | 0.69875824 | 0.55386405 |
| cg09488090 | 16 | 0.00295711 | 0.83516637 | 0.80861238 | 0.68836031 |
| cg14260169 | 10 | 0.00297228 | 0.38097114 | 0.44085921 | 0.2318742  |
| cg05607079 | 3  | 0.00073547 | 0.89562422 | 0.85029084 | 0.74404085 |
| cg25016544 | 5  | 0.0131276  | 0.34807192 | 0.34710982 | 0.23458903 |
| cg01768201 | 5  | 0.00629935 | 0.57750989 | 0.48530647 | 0.35508536 |
| cg06422883 | 5  | 0.01789337 | 0.6587877  | 0.62942513 | 0.44156328 |
| cg01240795 | 5  | 0.02041679 | 0.75101831 | 0.75746534 | 0.57838881 |
| cg12656681 | 5  | 0.01670995 | 0.57679216 | 0.5902765  | 0.35598012 |
| cg06159353 | 5  | 0.03528716 | 0.62886179 | 0.69905676 | 0.43316253 |
| cg09553242 | 5  | 0.04378149 | 0.70600597 | 0.77328531 | 0.57579646 |
| cg09835740 | 5  | 0.01356792 | 0.60209097 | 0.69845921 | 0.44734234 |
| cg16667631 | 5  | 0.01234856 | 0.75558499 | 0.82402191 | 0.62329679 |
| cg25113089 | 5  | 0.01097293 | 0.41320296 | 0.48023739 | 0.29620355 |
| cg11176481 | 5  | 0.00703549 | 0.49637783 | 0.40946045 | 0.26815496 |
| cg01558931 | 5  | 0.00768024 | 0.50272006 | 0.44310564 | 0.27660925 |
| cg17598999 | 5  | 0.01618273 | 0.44014493 | 0.48954758 | 0.33593154 |
| cg00462107 | 5  | 0.00631385 | 0.45182289 | 0.5284063  | 0.33609482 |
| cg21046148 | 5  | 0.00853629 | 0.73500335 | 0.70464192 | 0.58375502 |
| cg01025233 | 5  | 0.0103161  | 0.73300525 | 0.7728665  | 0.48496838 |
| cg17573301 | 5  | 0.02823023 | 0.70387128 | 0.72990184 | 0.52082569 |
| cg15499368 | 5  | 0.00509326 | 0.6257137  | 0.71159008 | 0.35413538 |
| cg23440636 | 5  | 0.01485881 | 0.67367604 | 0.79244726 | 0.5043521  |
| cg09160020 | 5  | 0.02457467 | 0.71983505 | 0.85167604 | 0.61845737 |
| cg06647928 | 5  | 0.00262173 | 0.85051753 | 0.83960517 | 0.66540045 |
| cg01117339 | 11 | 0.00146203 | 0.79305916 | 0.69997523 | 0.50442005 |
| cg02608831 | 8  | 0.00085355 | 0.73048287 | 0.68084547 | 0.49169677 |
| cg12032650 | 7  | 0.03472106 | 0.55944292 | 0.57219119 | 0.44142587 |
| cg23361127 | 5  | 0.00866121 | 0.83817226 | 0.87711625 | 0.70255849 |
| cg07904073 | 10 | 0.01110735 | 0.63502392 | 0.62593523 | 0.45293997 |
| cg20544372 | 7  | 0.03736046 | 0.44557566 | 0.44326158 | 0.31196232 |
| cg05207637 | 16 | 0.00463443 | 0.53633399 | 0.56741474 | 0.41252588 |
| cg14508696 | 15 | 0.01163705 | 0.61391082 | 0.62405242 | 0.39744804 |
| cg20116800 | 17 | 0.02385226 | 0.68821474 | 0.65886951 | 0.54858103 |
| cg07343174 | 18 | 0.02151248 | 0.7131955  | 0.73628888 | 0.60353021 |

|                 |    |            |            |            |            |
|-----------------|----|------------|------------|------------|------------|
| cg14747132      | 12 | 0.02343917 | 0.65092757 | 0.65351463 | 0.51205065 |
| cg14343713      | 11 | 0.0043837  | 0.57659718 | 0.5691767  | 0.43396531 |
| cg22780193      | 13 | 0.02483202 | 0.78698198 | 0.72732617 | 0.60357324 |
| cg10900663      | 14 | 0.00182631 | 0.48266737 | 0.36431286 | 0.2517717  |
| cg05796504      | 16 | 0.00806542 | 0.52231802 | 0.52378106 | 0.41613299 |
| cg13308743      | 17 | 0.04482831 | 0.56821529 | 0.51873228 | 0.39384887 |
| cg04184716      | 14 | 0.00988742 | 0.7067291  | 0.74279033 | 0.50339286 |
| cg11597902      | 17 | 0.00248015 | 0.83904076 | 0.83563985 | 0.69515064 |
| cg05850870      | 2  | 0.00086498 | 0.89228933 | 0.84431516 | 0.73274856 |
| cg08858426      | 17 | 0.00117894 | 0.79107392 | 0.72697441 | 0.54972404 |
| cg17472111      | 11 | 0.00243597 | 0.33294545 | 0.35875872 | 0.16972089 |
| cg25738326      | 15 | 0.00403008 | 0.42312044 | 0.33952127 | 0.21915745 |
| cg06825878      | 7  | 0.02009829 | 0.57725329 | 0.62037193 | 0.47532056 |
| cg18720803      | 4  | 0.00456818 | 0.71089302 | 0.70031628 | 0.48399722 |
| cg06829584      | 10 | 0.00279494 | 0.85450824 | 0.8305468  | 0.65367615 |
| cg02138953      | 10 | 0.00081789 | 0.76945927 | 0.69518633 | 0.49007174 |
| cg06677367      | 11 | 0.00065949 | 0.76085394 | 0.62879767 | 0.50624563 |
| cg05209996      | 11 | 0.00754215 | 0.33730322 | 0.35877582 | 0.21433003 |
| cg07770402      | 18 | 0.01203452 | 0.78781739 | 0.7597307  | 0.63016002 |
| cg07817608      | 12 | 0.00100445 | 0.78697288 | 0.67014975 | 0.52244138 |
| cg05762612      | 18 | 0.00436502 | 0.51981001 | 0.53241635 | 0.39580568 |
| cg26556489      | 18 | 0.01141835 | 0.69545691 | 0.71048964 | 0.54797282 |
| cg18537464      | 18 | 0.02735855 | 0.6376456  | 0.6342185  | 0.49045147 |
| cg21348406      | 17 | 0.01294921 | 0.68803236 | 0.70641045 | 0.52009207 |
| cg03884860      | 18 | 0.03824432 | 0.66725985 | 0.64798276 | 0.54631977 |
| cg03411579      | 12 | 0.00081599 | 0.55994323 | 0.49574443 | 0.33153883 |
| cg02072834      | 14 | 0.04180327 | 0.57174447 | 0.57134047 | 0.46016325 |
| cg04797957      | 17 | 0.0286529  | 0.23976009 | 0.27704044 | 0.13964946 |
| cg19413066      | 17 | 0.01373528 | 0.38570951 | 0.37905278 | 0.27213489 |
| cg04759376      | 10 | 0.03738486 | 0.51937703 | 0.55743996 | 0.39828511 |
| cg00901878      | 13 | 0.00197189 | 0.79437583 | 0.75524711 | 0.64462075 |
| cg18413218      | 14 | 0.00372084 | 0.60393961 | 0.60409599 | 0.30789754 |
| cg00213052      | 18 | 0.00398122 | 0.53905146 | 0.55257576 | 0.3100106  |
| cg14453935      | 18 | 0.04580358 | 0.71289115 | 0.63544952 | 0.53360712 |
| cg18817955      | 14 | 0.00910491 | 0.78246274 | 0.76092439 | 0.64227083 |
| cg08324862      | 12 | 0.01245683 | 0.66113253 | 0.68298711 | 0.5577988  |
| cg06822193      | 15 | 0.01145563 | 0.46790195 | 0.43635714 | 0.3174203  |
| cg10259521      | 15 | 0.0122204  | 0.63959231 | 0.62097652 | 0.50505806 |
| cg14579864      | 9  | 0.02911369 | 0.53906747 | 0.57772552 | 0.40211579 |
| cg00835745      | 15 | 0.00505751 | 0.64566152 | 0.68266216 | 0.40880538 |
| cg18659867      | 10 | 0.00420965 | 0.73031075 | 0.7008174  | 0.46675485 |
| cg07013698      | 17 | 0.01957672 | 0.31458211 | 0.30962264 | 0.18752689 |
| cg25175654      | 17 | 0.00245827 | 0.45239508 | 0.41549636 | 0.31306425 |
| ch.10.80061816F | 10 | 0.01690382 | 0.35617671 | 0.33388807 | 0.20866019 |
| cg05317600      | 13 | 0.00099274 | 0.83758784 | 0.81050992 | 0.62127478 |
| cg23346544      | 8  | 0.03931081 | 0.64895888 | 0.67107538 | 0.53580805 |

|                |    |            |            |             |            |
|----------------|----|------------|------------|-------------|------------|
| cg27449200     | 15 | 0.00194981 | 0.64580169 | 0.58806281  | 0.41919092 |
| cg01940753     | 15 | 0.00440271 | 0.68087468 | 0.77151895  | 0.41750585 |
| cg08783317     | 11 | 0.02009425 | 0.8177104  | 0.79928143  | 0.69798137 |
| cg09533845     | 8  | 0.01317683 | 0.41846686 | 0.42671269  | 0.28623231 |
| cg00602295     | 16 | 0.00485228 | 0.51891033 | 0.47872757  | 0.28647113 |
| cg22812413     | 15 | 0.00796638 | 0.58103962 | 0.59882168  | 0.38996528 |
| cg21807262     | 14 | 0.00065949 | 0.78273635 | 0.71405611  | 0.58513463 |
| cg09318283     | 8  | 0.00752854 | 0.81143347 | 0.78944366  | 0.67135478 |
| ch.3.82259654F | 3  | 0.00100019 | 0.31408511 | 0.23969276  | 0.1185741  |
| cg16534399     | 16 | 0.00509326 | 0.49877468 | 0.51083369  | 0.28290227 |
| cg17391194     | 11 | 0.00208359 | 0.82130724 | 0.81769002  | 0.68605529 |
| cg14212012     | 3  | 0.00150566 | 0.30342817 | 0.31399096  | 0.13692474 |
| cg11125758     | 14 | 0.01866928 | 0.84701136 | 0.82969636  | 0.71489162 |
| cg04528720     | 16 | 0.00084118 | 0.77689091 | 0.70639238  | 0.59461871 |
| cg25132782     | 15 | 0.03699135 | 0.70607577 | 0.74990869  | 0.58202655 |
| cg17765025     | 2  | 0.00521564 | 0.80103556 | 0.79785207  | 0.65084684 |
| cg11955727     | 2  | 0.00854173 | 0.82374251 | 0.844444553 | 0.67938887 |
| cg07726287     | 16 | 0.00768774 | 0.58639512 | 0.57750121  | 0.4510464  |
| cg26645655     | 3  | 0.01734283 | 0.7528361  | 0.751351    | 0.63922202 |
| cg01722566     | 16 | 0.0135118  | 0.7593114  | 0.71966372  | 0.58766183 |
| cg15034300     | 2  | 0.00597656 | 0.31960756 | 0.32998741  | 0.21298524 |
| cg16700163     | 16 | 0.00302287 | 0.69335604 | 0.62736297  | 0.36444975 |
| cg02975243     | 16 | 0.00368022 | 0.76949379 | 0.74401984  | 0.63750667 |
| cg12656085     | 2  | 0.01802754 | 0.55677583 | 0.59098138  | 0.3778667  |
| cg02803141     | 16 | 0.00091059 | 0.88975616 | 0.85120119  | 0.69971657 |
| cg02201914     | 4  | 0.00263648 | 0.49651974 | 0.50795801  | 0.27825387 |
| cg23793104     | 4  | 0.0035878  | 0.68783749 | 0.68497156  | 0.40416061 |
| cg03475509     | 4  | 0.01580766 | 0.66328694 | 0.66454086  | 0.46732944 |
| cg03988540     | 4  | 0.00461358 | 0.63009986 | 0.59985518  | 0.39767311 |
| cg22122321     | 4  | 0.00229687 | 0.75938446 | 0.7350839   | 0.53483763 |
| cg13996610     | 4  | 0.00329066 | 0.79898114 | 0.73953656  | 0.62853756 |
| cg01227239     | 4  | 0.01015703 | 0.45204036 | 0.48013789  | 0.30526783 |
| cg08474859     | 4  | 0.00168532 | 0.57203028 | 0.54096829  | 0.34249896 |
| cg00316839     | 4  | 0.0058315  | 0.61721451 | 0.58684758  | 0.42883585 |
| cg22869030     | 4  | 0.00342408 | 0.48571412 | 0.47290029  | 0.30177841 |
| cg07673740     | 4  | 0.00689691 | 0.53807013 | 0.56728748  | 0.30031373 |
| cg11857320     | 4  | 0.00291825 | 0.56936915 | 0.5583047   | 0.3484213  |
| cg04184019     | 4  | 0.00606663 | 0.39842831 | 0.38492976  | 0.23592169 |
| cg03998835     | 6  | 0.02115579 | 0.52818119 | 0.51540143  | 0.36127732 |
| cg10893095     | 6  | 0.0023961  | 0.53676212 | 0.5394764   | 0.32168694 |
| cg09708616     | 6  | 0.00342811 | 0.38686791 | 0.40737621  | 0.228902   |
| cg26299756     | 6  | 0.00648231 | 0.40317677 | 0.43891718  | 0.2587094  |
| cg25560696     | 6  | 0.01670995 | 0.74369891 | 0.80183551  | 0.55165455 |
| cg09832245     | 16 | 0.04010261 | 0.71293546 | 0.76385673  | 0.61233296 |
| cg13536080     | 11 | 0.01042401 | 0.53476963 | 0.45242542  | 0.3349987  |
| cg13718418     | 12 | 0.01580869 | 0.6542979  | 0.66159774  | 0.55197695 |

|            |    |            |            |            |            |
|------------|----|------------|------------|------------|------------|
| cg16596317 | 1  | 0.00236052 | 0.67739384 | 0.61876652 | 0.37794552 |
| cg05792169 | 15 | 0.00233298 | 0.50241252 | 0.46301141 | 0.34339448 |
| cg08428292 | 16 | 0.00141131 | 0.83737839 | 0.82664396 | 0.7081815  |
| cg18802138 | 16 | 0.01887509 | 0.64047368 | 0.66134121 | 0.45116545 |
| cg00335219 | 16 | 0.01432832 | 0.52775492 | 0.56509304 | 0.39355828 |
| cg18019509 | 6  | 0.0037342  | 0.80157223 | 0.75576805 | 0.64201915 |
| cg02502233 | 6  | 0.00520163 | 0.29634238 | 0.30068472 | 0.17156104 |
| cg02637247 | 16 | 0.00273355 | 0.78278235 | 0.75824437 | 0.65322147 |
| cg05626644 | 16 | 0.00117325 | 0.78507439 | 0.63997667 | 0.51925076 |
| cg10332116 | 16 | 0.003807   | 0.39533093 | 0.40551996 | 0.2413191  |
| cg17989763 | 10 | 0.00252483 | 0.80952953 | 0.82888367 | 0.68415819 |
| cg16622061 | 16 | 0.0062271  | 0.70056142 | 0.68766599 | 0.51226273 |
| cg01831404 | 5  | 0.02122541 | 0.81650741 | 0.80293932 | 0.70010659 |
| cg24215812 | 10 | 0.02677197 | 0.5409437  | 0.54080363 | 0.4074868  |
| cg09338148 | 16 | 0.00302287 | 0.37681615 | 0.30228667 | 0.17337825 |
| cg04843568 | 5  | 0.01095648 | 0.32254823 | 0.364324   | 0.22030514 |
| cg09247170 | 14 | 0.00244246 | 0.35476783 | 0.40840169 | 0.19855496 |
| cg04041159 | 16 | 0.01390151 | 0.58285977 | 0.55651719 | 0.44906285 |
| cg24406240 | 11 | 0.00878866 | 0.59486027 | 0.62192466 | 0.43278364 |
| cg01413671 | 16 | 0.00144989 | 0.83223211 | 0.76941719 | 0.6569727  |
| cg00318897 | 16 | 0.00118031 | 0.72124904 | 0.69417914 | 0.59158119 |
| cg27464846 | 16 | 0.00198797 | 0.8393912  | 0.79737966 | 0.69057933 |
| cg21494379 | 5  | 0.01376061 | 0.78922336 | 0.76409795 | 0.59772346 |
| cg25414639 | 15 | 0.0023187  | 0.87731014 | 0.85473664 | 0.74781388 |
| cg23598010 | 12 | 0.00065949 | 0.69372531 | 0.56468559 | 0.41728506 |
| cg10172979 | 14 | 0.02627541 | 0.64875527 | 0.64593343 | 0.53061053 |
| cg06531870 | 13 | 0.01946986 | 0.51507282 | 0.53108671 | 0.38457632 |
| cg06183244 | 6  | 0.00463727 | 0.69550995 | 0.64802288 | 0.54675547 |
| cg12177851 | 15 | 0.0194986  | 0.75338687 | 0.74033455 | 0.58514493 |
| cg02984092 | 15 | 0.00547629 | 0.72645672 | 0.76531325 | 0.53240631 |
| cg10513595 | 5  | 0.02720807 | 0.7816981  | 0.77472337 | 0.65724776 |
| cg15547143 | 10 | 0.00459107 | 0.81710228 | 0.81035174 | 0.70094754 |
| cg00172872 | 12 | 0.00113577 | 0.87611829 | 0.83658056 | 0.64172965 |
| cg09884419 | 15 | 0.00099274 | 0.52512639 | 0.42678661 | 0.19862252 |
| cg16846514 | 11 | 0.0440672  | 0.76145421 | 0.77339954 | 0.63948216 |
| cg25430838 | 10 | 0.03204666 | 0.72099133 | 0.77124433 | 0.60646588 |
| cg20801645 | 15 | 0.01887078 | 0.59136831 | 0.59546949 | 0.45592133 |
| cg17083685 | 13 | 0.01092901 | 0.60968277 | 0.57629004 | 0.40364336 |
| cg10255237 | 12 | 0.02382799 | 0.80515456 | 0.81926323 | 0.64252099 |
| cg03618113 | 12 | 0.0065693  | 0.6920949  | 0.68430019 | 0.50331847 |
| cg25946790 | 14 | 0.01264372 | 0.44188424 | 0.43185538 | 0.28317317 |
| cg13410764 | 9  | 0.00087343 | 0.62956867 | 0.55103927 | 0.3609615  |
| cg08447373 | 5  | 0.00119385 | 0.52458301 | 0.42502087 | 0.28137416 |
| cg26404226 | 10 | 0.0012838  | 0.73817208 | 0.71396852 | 0.54750256 |
| cg16598679 | 14 | 0.00081413 | 0.68303953 | 0.65035229 | 0.39810157 |
| cg21946631 | 7  | 0.00149569 | 0.69839115 | 0.60431581 | 0.46050103 |



|            |    |            |            |            |            |
|------------|----|------------|------------|------------|------------|
| cg11465213 | 15 | 0.02338172 | 0.60550519 | 0.65388178 | 0.45103124 |
| cg07786355 | 10 | 0.00168532 | 0.85192407 | 0.80740592 | 0.67976013 |
| cg10108710 | 14 | 0.000777   | 0.89507278 | 0.8130878  | 0.7124052  |
| cg00460983 | 10 | 0.00569156 | 0.75842901 | 0.79054336 | 0.6061606  |
| cg07453778 | 6  | 0.00840828 | 0.4820262  | 0.5459665  | 0.3451237  |
| cg16440978 | 14 | 0.00065949 | 0.62248664 | 0.35143491 | 0.1709459  |
| cg10850823 | 5  | 0.02680775 | 0.59196952 | 0.61898503 | 0.46020862 |
| cg14785064 | 2  | 0.03358212 | 0.52828417 | 0.55181991 | 0.41205417 |
| cg04510459 | 1  | 0.00161582 | 0.63298318 | 0.61196809 | 0.41204235 |
| cg04239548 | 1  | 0.00072814 | 0.85923948 | 0.78141871 | 0.67071722 |
| cg25765315 | 12 | 0.00065949 | 0.83798587 | 0.74310323 | 0.49463258 |
| cg18263166 | 7  | 0.0016785  | 0.50339661 | 0.46612245 | 0.22194804 |
| cg11284842 | 5  | 0.02743413 | 0.53467912 | 0.513398   | 0.40933045 |
| cg19429051 | 5  | 0.03274494 | 0.6770141  | 0.66170344 | 0.53509187 |
| cg07533422 | 5  | 0.00873119 | 0.45977469 | 0.42914446 | 0.3289983  |
| cg22658758 | 5  | 0.01260286 | 0.41727585 | 0.40238306 | 0.27423598 |
| cg11670789 | 15 | 0.00245827 | 0.70948601 | 0.70592274 | 0.51813092 |
| cg14358570 | 14 | 0.00639646 | 0.51016369 | 0.56615032 | 0.37777085 |
| cg08584947 | 8  | 0.00146869 | 0.84591229 | 0.82012692 | 0.70842936 |
| cg09564361 | 8  | 0.00207996 | 0.51683805 | 0.50538733 | 0.24334602 |
| cg14488466 | 9  | 0.00084118 | 0.51916163 | 0.417196   | 0.17641044 |
| cg21241675 | 9  | 0.0120439  | 0.62790126 | 0.6622103  | 0.4497792  |
| cg13823964 | 9  | 0.00457701 | 0.53033257 | 0.51417931 | 0.3170883  |
| cg02922879 | 1  | 0.00387834 | 0.46368457 | 0.40665691 | 0.29082037 |
| cg16060189 | 10 | 0.02118965 | 0.62824936 | 0.67861283 | 0.52199532 |
| cg25483123 | 12 | 0.0016785  | 0.81489053 | 0.77326448 | 0.6192296  |
| cg12999267 | 12 | 0.00670577 | 0.32324789 | 0.32528163 | 0.20016265 |
| cg08257009 | 14 | 0.00375204 | 0.70629954 | 0.66435027 | 0.50076636 |
| cg27295434 | 1  | 0.0011159  | 0.87136251 | 0.85254166 | 0.72575594 |
| cg07144720 | 3  | 0.01183547 | 0.49323834 | 0.4632694  | 0.34454717 |
| cg00778190 | 1  | 0.01393327 | 0.60250467 | 0.63444714 | 0.42769756 |
| cg24941342 | 11 | 0.00554761 | 0.79981713 | 0.81433624 | 0.61760193 |
| cg09051342 | 8  | 0.00066232 | 0.68195716 | 0.54005978 | 0.3816988  |
| cg25969107 | 15 | 0.00639697 | 0.55295912 | 0.61852162 | 0.3491385  |
| cg06788267 | 1  | 0.0026101  | 0.72271517 | 0.72666219 | 0.44229566 |
| cg18808466 | 13 | 0.00917702 | 0.81812214 | 0.83521764 | 0.70399034 |
| cg06388350 | 4  | 0.00213077 | 0.37508395 | 0.34690554 | 0.16971019 |
| cg20068510 | 15 | 0.00073118 | 0.89114825 | 0.83655198 | 0.72107556 |
| cg25668093 | 15 | 0.01259427 | 0.74741574 | 0.82829831 | 0.61814712 |
| cg12434362 | 5  | 0.01426642 | 0.75140493 | 0.77780226 | 0.65098947 |
| cg23464619 | 13 | 0.03940048 | 0.53768261 | 0.60926873 | 0.42613978 |
| cg13681496 | 9  | 0.0293309  | 0.4427162  | 0.44395159 | 0.33990698 |
| cg04203453 | 8  | 0.01015703 | 0.38283179 | 0.4010005  | 0.25675566 |
| cg16099687 | 12 | 0.01291157 | 0.72178081 | 0.72069495 | 0.51791828 |
| cg23314893 | 5  | 0.00779924 | 0.54898821 | 0.57852903 | 0.36917332 |
| cg07959469 | 15 | 0.03174945 | 0.72331508 | 0.74833817 | 0.61370138 |

|            |    |            |            |            |            |
|------------|----|------------|------------|------------|------------|
| cg17454263 | 15 | 0.00252984 | 0.64204477 | 0.68079941 | 0.43083495 |
| cg05289920 | 15 | 0.03933893 | 0.78666108 | 0.79594942 | 0.64743378 |
| cg00033666 | 15 | 0.0133181  | 0.77195499 | 0.82325945 | 0.66139233 |
| cg17140992 | 15 | 0.01529615 | 0.60127496 | 0.62779795 | 0.43543851 |
| cg27336587 | 15 | 0.01317469 | 0.77317833 | 0.79153723 | 0.66203738 |
| cg15281710 | 15 | 0.01342633 | 0.81190477 | 0.82767789 | 0.68707888 |
| cg21834679 | 15 | 0.01336583 | 0.73507664 | 0.78115016 | 0.61386401 |
| cg01223086 | 15 | 0.00667367 | 0.57503957 | 0.62035653 | 0.39812042 |
| cg25428740 | 2  | 0.00485896 | 0.41173286 | 0.42555254 | 0.25483201 |
| cg06837325 | 5  | 0.00366179 | 0.82277872 | 0.83947109 | 0.72113027 |
| cg27423669 | 13 | 0.01373528 | 0.60744746 | 0.5735406  | 0.46080249 |
| cg04230579 | 11 | 0.01678972 | 0.88677777 | 0.89589099 | 0.78122174 |
| cg21653474 | 6  | 0.00065949 | 0.57756916 | 0.48550376 | 0.36735006 |
| cg10419556 | 8  | 0.01241725 | 0.49136406 | 0.45223722 | 0.33880362 |
| cg18643563 | 14 | 0.00971274 | 0.54854499 | 0.54347777 | 0.39498177 |
| cg14378231 | 1  | 0.00144359 | 0.5859378  | 0.47073971 | 0.32519277 |
| cg03848421 | 10 | 0.0157632  | 0.40626211 | 0.40650071 | 0.27035974 |
| cg12593746 | 1  | 0.00128378 | 0.4474163  | 0.4401457  | 0.1675325  |
| cg27076113 | 6  | 0.00338778 | 0.27118552 | 0.30068472 | 0.16677556 |
| cg03593014 | 10 | 0.01183547 | 0.58188137 | 0.56200234 | 0.37107375 |
| cg03580065 | 10 | 0.03174689 | 0.60782714 | 0.61500251 | 0.49914566 |
| cg15583285 | 6  | 0.00221105 | 0.35462303 | 0.3324677  | 0.19729645 |
| cg02756683 | 10 | 0.04046492 | 0.73353224 | 0.74612897 | 0.59211946 |
| cg17150809 | 6  | 0.0107931  | 0.80040764 | 0.82145956 | 0.69132828 |
| cg13522075 | 9  | 0.0198367  | 0.52800049 | 0.45547756 | 0.35503727 |
| cg06257058 | 7  | 0.01725665 | 0.54337615 | 0.54425312 | 0.4351882  |
| cg20617957 | 13 | 0.00694471 | 0.41411022 | 0.43689035 | 0.2543211  |
| cg20012607 | 13 | 0.01388202 | 0.33025023 | 0.38395727 | 0.2223052  |
| cg04362790 | 14 | 0.00065949 | 0.66825736 | 0.42347734 | 0.30566584 |
| cg07485423 | 4  | 0.00132756 | 0.49423327 | 0.41546085 | 0.24162378 |
| cg15457481 | 4  | 0.00065949 | 0.8256089  | 0.73872025 | 0.5383072  |
| cg05494668 | 11 | 0.00109839 | 0.72495192 | 0.64417684 | 0.52148999 |
| cg04230891 | 6  | 0.00263672 | 0.42001258 | 0.45733487 | 0.26014397 |
| cg01889956 | 6  | 0.00066232 | 0.46593328 | 0.33129669 | 0.20335221 |
| cg10123952 | 3  | 0.03409516 | 0.69340865 | 0.67069559 | 0.55473435 |
| cg01905090 | 1  | 0.00262173 | 0.82261825 | 0.81602153 | 0.69619154 |
| cg14327296 | 14 | 0.00768774 | 0.3605661  | 0.38950272 | 0.25483863 |
| cg02954563 | 14 | 0.00629716 | 0.44064617 | 0.43514199 | 0.30133572 |
| cg03185794 | 13 | 0.00081928 | 0.78622218 | 0.72711196 | 0.53773727 |
| cg26063904 | 1  | 0.01026117 | 0.79402606 | 0.79945204 | 0.6911889  |
| cg14918548 | 2  | 0.028548   | 0.44463553 | 0.48045042 | 0.34055846 |
| cg08702879 | 10 | 0.00189637 | 0.7079791  | 0.66484444 | 0.55050463 |
| cg03312117 | 2  | 0.00631832 | 0.6671445  | 0.55608635 | 0.43106472 |
| cg22909709 | 8  | 0.00805596 | 0.72843317 | 0.7295014  | 0.60037766 |
| cg13106758 | 15 | 0.00211366 | 0.65025667 | 0.58735198 | 0.39612502 |
| cg19009471 | 14 | 0.00520958 | 0.71523698 | 0.6694165  | 0.56770915 |

|                 |    |            |            |            |            |
|-----------------|----|------------|------------|------------|------------|
| cg11667061      | 14 | 0.00537181 | 0.5758616  | 0.4504435  | 0.34354286 |
| cg13758186      | 2  | 0.00155292 | 0.55305898 | 0.48056723 | 0.36805892 |
| cg17654419      | 2  | 0.0008696  | 0.7926773  | 0.74169878 | 0.59134732 |
| cg01771065      | 14 | 0.00664725 | 0.7689666  | 0.76311398 | 0.60448947 |
| cg22202381      | 13 | 0.00504019 | 0.74284951 | 0.72259769 | 0.60405443 |
| cg15840891      | 2  | 0.00474032 | 0.50516426 | 0.38122404 | 0.24406404 |
| cg08461576      | 4  | 0.01365382 | 0.73115725 | 0.72469882 | 0.56304523 |
| cg22022821      | 11 | 0.00078196 | 0.8797925  | 0.84692207 | 0.73239838 |
| cg02775243      | 10 | 0.04127719 | 0.65667599 | 0.69163267 | 0.52700837 |
| cg19928294      | 6  | 0.04832512 | 0.47646655 | 0.49418443 | 0.34977362 |
| cg15128147      | 2  | 0.01711555 | 0.57821411 | 0.58367363 | 0.43249028 |
| cg26269286      | 14 | 0.00396452 | 0.37341239 | 0.36489439 | 0.22706658 |
| cg19589396      | 8  | 0.00112679 | 0.76589889 | 0.73959108 | 0.58107708 |
| cg02987523      | 13 | 0.00758361 | 0.83974701 | 0.84129041 | 0.72402989 |
| cg04481603      | 10 | 0.01268304 | 0.5534908  | 0.53453246 | 0.42470832 |
| cg12950030      | 14 | 0.00135325 | 0.4469135  | 0.42681472 | 0.29514351 |
| cg03022263      | 14 | 0.00127427 | 0.65036835 | 0.62221257 | 0.51208064 |
| cg21833076      | 11 | 0.00648231 | 0.53167352 | 0.58114963 | 0.38410407 |
| cg02495743      | 11 | 0.0009264  | 0.33321289 | 0.26666195 | 0.12449603 |
| cg17812664      | 10 | 0.04866142 | 0.73372955 | 0.72850685 | 0.59103717 |
| cg16759813      | 2  | 0.01398885 | 0.49367784 | 0.51361066 | 0.38994113 |
| cg22865501      | 2  | 0.01579113 | 0.85429165 | 0.86160481 | 0.75284844 |
| cg05979457      | 8  | 0.00616656 | 0.50169921 | 0.43625191 | 0.23709013 |
| cg00998372      | 2  | 0.0037756  | 0.56471657 | 0.42274112 | 0.30786525 |
| cg22928386      | 2  | 0.0157632  | 0.69079534 | 0.61820812 | 0.4756679  |
| cg07316846      | 2  | 0.00437887 | 0.75433468 | 0.69813114 | 0.57962387 |
| cg13077865      | 8  | 0.00714351 | 0.8352399  | 0.8358694  | 0.71858366 |
| cg20788020      | 8  | 0.00069166 | 0.74188072 | 0.59579869 | 0.46694921 |
| cg111111372     | 7  | 0.00283173 | 0.48160817 | 0.45014369 | 0.30940068 |
| cg13155421      | 3  | 0.00071044 | 0.80180352 | 0.72635012 | 0.58932623 |
| cg00100420      | 4  | 0.00168849 | 0.32234202 | 0.32860665 | 0.12699711 |
| cg17947364      | 6  | 0.00065949 | 0.90308208 | 0.84444781 | 0.68932503 |
| cg09477232      | 7  | 0.00279494 | 0.78181482 | 0.7668425  | 0.61203018 |
| cg21557087      | 2  | 0.00073118 | 0.84894449 | 0.80161232 | 0.63984224 |
| cg00139681      | 7  | 0.00405622 | 0.51411975 | 0.51665078 | 0.31110147 |
| cg14387626      | 14 | 0.00820507 | 0.55402642 | 0.59548871 | 0.42453357 |
| cg03875496      | 6  | 0.00127427 | 0.53747222 | 0.60139782 | 0.28646771 |
| cg00688840      | 14 | 0.03174689 | 0.36455157 | 0.36619979 | 0.23857931 |
| cg27576694      | 7  | 0.00193378 | 0.48457586 | 0.56604826 | 0.30678126 |
| cg04686230      | 6  | 0.00481427 | 0.44020358 | 0.41905772 | 0.26752215 |
| ch.2.105901354F | 2  | 0.00092643 | 0.38898446 | 0.333906   | 0.17624217 |
| cg17666418      | 6  | 0.01995197 | 0.68398996 | 0.69690293 | 0.49616481 |
| cg06775939      | 14 | 0.0102143  | 0.39361036 | 0.45116256 | 0.28298154 |
| cg17494199      | 13 | 0.00796638 | 0.74106563 | 0.7955771  | 0.61647113 |
| cg04103847      | 10 | 0.03152563 | 0.69989609 | 0.70518476 | 0.59660804 |
| cg07368069      | 12 | 0.00320053 | 0.2797448  | 0.29397578 | 0.16803577 |

|            |    |            |            |            |            |
|------------|----|------------|------------|------------|------------|
| cg16479476 | 6  | 0.00065949 | 0.83461875 | 0.69976574 | 0.5627134  |
| cg08950364 | 1  | 0.02445578 | 0.59210697 | 0.66083207 | 0.40524267 |
| cg21186098 | 8  | 0.00244246 | 0.45643245 | 0.52727348 | 0.28362254 |
| cg00951857 | 6  | 0.02004883 | 0.58567253 | 0.64809078 | 0.46206979 |
| cg08707476 | 1  | 0.01052554 | 0.70565918 | 0.72501003 | 0.59498224 |
| cg01950077 | 6  | 0.04423676 | 0.66703941 | 0.64091465 | 0.52726219 |
| cg04064998 | 11 | 0.02833301 | 0.4158116  | 0.4125672  | 0.24663828 |
| cg12894371 | 6  | 0.0066172  | 0.5948488  | 0.59319975 | 0.45320458 |
| cg20608895 | 13 | 0.01024091 | 0.66310564 | 0.62544149 | 0.46921278 |
| cg02489769 | 12 | 0.00628685 | 0.76435951 | 0.76258819 | 0.64726052 |
| cg00556100 | 1  | 0.00516729 | 0.78338151 | 0.72786266 | 0.59478529 |
| cg05132925 | 1  | 0.00314361 | 0.64547348 | 0.63615516 | 0.46365507 |
| cg01733904 | 13 | 0.00417561 | 0.76640873 | 0.79691335 | 0.58881051 |
| cg21197796 | 9  | 0.00077468 | 0.68381846 | 0.59255306 | 0.47381069 |
| cg22006640 | 4  | 0.00084594 | 0.32567853 | 0.32375123 | 0.20758251 |
| cg13891768 | 4  | 0.00958999 | 0.31001335 | 0.28048854 | 0.17171969 |
| cg04676482 | 4  | 0.00227742 | 0.46507358 | 0.46404703 | 0.33999927 |
| cg05492170 | 4  | 0.00227742 | 0.35419758 | 0.37021147 | 0.19248075 |
| cg11761728 | 4  | 0.00570747 | 0.42503646 | 0.46671877 | 0.31925416 |
| cg19849728 | 4  | 0.00124853 | 0.26632085 | 0.27935632 | 0.12489094 |
| cg23646776 | 4  | 0.00093631 | 0.2305769  | 0.24367099 | 0.09936137 |
| cg07790170 | 4  | 0.00182655 | 0.32886786 | 0.34929728 | 0.13367709 |
| cg03722396 | 4  | 0.00290589 | 0.41289876 | 0.45608017 | 0.20594349 |
| cg16041686 | 4  | 0.00177922 | 0.36901379 | 0.37035498 | 0.22086263 |
| cg01733176 | 4  | 0.01975439 | 0.29848151 | 0.31348277 | 0.18941256 |
| cg17242937 | 4  | 0.00160662 | 0.49460315 | 0.50704009 | 0.28119037 |
| cg16933229 | 4  | 0.00334886 | 0.52025757 | 0.49058987 | 0.31165167 |
| cg03133735 | 4  | 0.00330119 | 0.48140917 | 0.51103693 | 0.27985468 |
| cg11671598 | 4  | 0.00456344 | 0.57311205 | 0.62128611 | 0.45586078 |
| cg13993197 | 1  | 0.00081925 | 0.58427579 | 0.51212152 | 0.38122556 |
| cg03171003 | 2  | 0.00196334 | 0.34529339 | 0.34008372 | 0.20701086 |
| cg24617444 | 10 | 0.01309134 | 0.42871651 | 0.450334   | 0.29289295 |
| cg03548415 | 11 | 0.02445578 | 0.40479649 | 0.38217396 | 0.26918736 |
| cg00035969 | 1  | 0.02157743 | 0.68927029 | 0.71521467 | 0.56829074 |
| cg01269299 | 10 | 0.00557338 | 0.79577188 | 0.77168227 | 0.6619866  |
| cg22976832 | 10 | 0.00314623 | 0.25023525 | 0.27294461 | 0.13737497 |
| cg02655361 | 3  | 0.00161582 | 0.77258401 | 0.73951017 | 0.57428656 |
| cg06685282 | 3  | 0.01944702 | 0.41386268 | 0.50588757 | 0.29850364 |
| cg09662304 | 13 | 0.01463398 | 0.58242986 | 0.66075147 | 0.47391088 |
| cg26117369 | 13 | 0.01616965 | 0.57049684 | 0.57945132 | 0.41918617 |
| cg22378095 | 6  | 0.00103895 | 0.68423294 | 0.61851985 | 0.49154934 |
| cg03705366 | 5  | 0.02944061 | 0.61255515 | 0.63132493 | 0.51085453 |
| cg20948409 | 3  | 0.01096214 | 0.4908929  | 0.49214338 | 0.38459987 |
| cg19186056 | 11 | 0.0439181  | 0.72429697 | 0.79596316 | 0.62342548 |
| cg11612799 | 3  | 0.04565804 | 0.65622047 | 0.62490501 | 0.48916736 |
| cg05117638 | 6  | 0.01776628 | 0.85146193 | 0.86891683 | 0.71279559 |

|            |    |            |            |            |            |
|------------|----|------------|------------|------------|------------|
| cg00066854 | 10 | 0.02146686 | 0.79732376 | 0.84306673 | 0.637913   |
| cg24103651 | 10 | 0.00804549 | 0.80673066 | 0.81963882 | 0.61092699 |
| cg09440866 | 12 | 0.01484626 | 0.36911651 | 0.3641265  | 0.23858675 |
| cg15274309 | 11 | 0.00089205 | 0.87126913 | 0.84268628 | 0.72738244 |
| cg04452203 | 4  | 0.01465773 | 0.29458679 | 0.27747824 | 0.16318081 |
| cg00437124 | 6  | 0.00430896 | 0.58538908 | 0.64075746 | 0.4069687  |
| cg03972891 | 2  | 0.00085355 | 0.86179226 | 0.83180866 | 0.72009056 |
| cg03254336 | 10 | 0.00065949 | 0.45727325 | 0.30827208 | 0.18653551 |
| cg11611580 | 6  | 0.01040141 | 0.50266409 | 0.48119391 | 0.37112132 |
| cg10233830 | 12 | 0.00539451 | 0.43500669 | 0.3999641  | 0.22412925 |
| cg24116380 | 5  | 0.0011414  | 0.79505176 | 0.7814884  | 0.64895317 |
| cg02637031 | 5  | 0.00248044 | 0.47249286 | 0.45377861 | 0.31722601 |
| cg02136690 | 13 | 0.00499353 | 0.35427558 | 0.34633374 | 0.21885151 |
| cg23739746 | 13 | 0.00585298 | 0.42027067 | 0.41531121 | 0.26364145 |
| cg25888386 | 10 | 0.00816896 | 0.70520937 | 0.77445999 | 0.56834995 |
| cg20799176 | 11 | 0.00826879 | 0.43238042 | 0.41028576 | 0.26023441 |
| cg18408273 | 4  | 0.0101333  | 0.56217099 | 0.63249313 | 0.45726631 |
| cg14855679 | 4  | 0.00329066 | 0.54091382 | 0.61928601 | 0.42738802 |
| cg25747670 | 1  | 0.00096242 | 0.73236375 | 0.68262949 | 0.49803798 |
| cg16550264 | 12 | 0.00486966 | 0.55192874 | 0.55534248 | 0.38673046 |
| cg16893861 | 7  | 0.02457497 | 0.62904665 | 0.61964993 | 0.50547898 |
| cg21584846 | 1  | 0.01183547 | 0.76253787 | 0.76042005 | 0.55857723 |
| cg19442415 | 11 | 0.0035878  | 0.33214707 | 0.33610589 | 0.23061102 |
| cg12136387 | 12 | 0.0051099  | 0.31225398 | 0.28676291 | 0.18528334 |
| cg13017929 | 7  | 0.00085355 | 0.73453816 | 0.63065399 | 0.52099    |
| cg00960147 | 1  | 0.00159601 | 0.51543983 | 0.4603386  | 0.27603496 |
| cg14113958 | 9  | 0.01768314 | 0.77662787 | 0.76403672 | 0.62715842 |
| cg22795331 | 6  | 0.00179209 | 0.85857683 | 0.82245311 | 0.71289104 |
| cg13838276 | 6  | 0.03020815 | 0.29555716 | 0.33684634 | 0.18156971 |
| cg11958234 | 1  | 0.00066232 | 0.90499492 | 0.84534239 | 0.70948294 |
| cg07301829 | 8  | 0.01015464 | 0.71134398 | 0.67980558 | 0.54279571 |
| cg25916172 | 10 | 0.00111057 | 0.5310044  | 0.52254138 | 0.42240276 |
| cg21308365 | 6  | 0.00224846 | 0.57901354 | 0.49696797 | 0.27804349 |
| cg06169746 | 3  | 0.00327239 | 0.76674087 | 0.74849655 | 0.58128598 |
| cg04214938 | 2  | 0.0039383  | 0.62671184 | 0.58366984 | 0.46401389 |
| cg12482501 | 10 | 0.0352175  | 0.73104317 | 0.70794969 | 0.59286181 |
| cg21301805 | 1  | 0.00277682 | 0.43901956 | 0.43892098 | 0.25152992 |
| cg26570165 | 1  | 0.00646891 | 0.64375803 | 0.60691203 | 0.41819047 |
| cg00667647 | 1  | 0.01997754 | 0.73546375 | 0.68699165 | 0.52031497 |
| cg26856924 | 1  | 0.01452282 | 0.69913318 | 0.68336021 | 0.46121046 |
| cg12659883 | 1  | 0.01679702 | 0.66050397 | 0.63031995 | 0.43039101 |
| cg02063759 | 1  | 0.01515174 | 0.66620722 | 0.62135444 | 0.42818596 |
| cg01439876 | 1  | 0.04388834 | 0.67622823 | 0.67403988 | 0.54890855 |
| cg17479943 | 1  | 0.00427027 | 0.69119794 | 0.686648   | 0.49601438 |
| cg24053992 | 1  | 0.00441677 | 0.74730461 | 0.71362465 | 0.59928797 |
| cg01994190 | 2  | 0.0063774  | 0.42953887 | 0.47317416 | 0.30891847 |

|            |    |            |            |            |            |
|------------|----|------------|------------|------------|------------|
| cg07080244 | 11 | 0.01467615 | 0.5170099  | 0.49546707 | 0.36373574 |
| cg07081245 | 11 | 0.00066232 | 0.67471348 | 0.52268118 | 0.40906767 |
| cg19318537 | 11 | 0.00311025 | 0.3854662  | 0.38181755 | 0.24509117 |
| cg26123824 | 10 | 0.00065949 | 0.73493078 | 0.6303359  | 0.46978967 |
| cg26671477 | 1  | 0.03342972 | 0.79196445 | 0.82579367 | 0.65208857 |
| cg02601475 | 5  | 0.02089413 | 0.69894952 | 0.69780894 | 0.53022636 |
| cg24298578 | 6  | 0.01806244 | 0.76596007 | 0.68979368 | 0.58925815 |
| cg26196626 | 8  | 0.00110703 | 0.52841594 | 0.43894989 | 0.26726222 |
| cg04844574 | 12 | 0.00357923 | 0.23997792 | 0.2433746  | 0.10654095 |
| cg13988455 | 10 | 0.00098208 | 0.65930909 | 0.53487697 | 0.41303044 |
| cg01434160 | 5  | 0.00166476 | 0.48457313 | 0.5015849  | 0.23963944 |
| cg18829827 | 5  | 0.00620953 | 0.68487512 | 0.70031689 | 0.57027474 |
| cg04285666 | 5  | 0.00458992 | 0.73775969 | 0.74166243 | 0.50908423 |
| cg14698448 | 5  | 0.01935097 | 0.70872585 | 0.69763294 | 0.57576572 |
| cg01250603 | 10 | 0.01643293 | 0.73217213 | 0.8001986  | 0.59782623 |
| cg01829632 | 5  | 0.01390012 | 0.60561389 | 0.62115575 | 0.49647631 |
| cg27365991 | 5  | 0.0010058  | 0.63621564 | 0.61306756 | 0.37028864 |
| cg07874386 | 5  | 0.00349176 | 0.72035219 | 0.69861712 | 0.57176522 |
| cg15083851 | 7  | 0.01580038 | 0.56277309 | 0.53938573 | 0.41213866 |
| cg24623760 | 12 | 0.00156239 | 0.85355601 | 0.835624   | 0.64539451 |
| cg14250450 | 10 | 0.02522711 | 0.5652636  | 0.58379111 | 0.45151704 |
| cg08639279 | 11 | 0.00113577 | 0.88792036 | 0.86352054 | 0.72989508 |
| cg10840277 | 8  | 0.00971058 | 0.77004221 | 0.79407866 | 0.63156874 |
| cg03129324 | 10 | 0.00606663 | 0.60898808 | 0.59867811 | 0.35546904 |
| cg15624719 | 4  | 0.00438281 | 0.60624245 | 0.5151428  | 0.40144136 |
| cg14397231 | 4  | 0.04698917 | 0.37271383 | 0.39550239 | 0.27024978 |
| cg07243762 | 12 | 0.00117201 | 0.72744475 | 0.64963602 | 0.53481192 |
| cg14503489 | 10 | 0.02358538 | 0.59075179 | 0.60241382 | 0.48358491 |
| cg26780125 | 8  | 0.0107931  | 0.63184814 | 0.67238479 | 0.44565467 |
| cg20945764 | 3  | 0.00901377 | 0.53482283 | 0.57089771 | 0.4188187  |
| cg16657152 | 8  | 0.00849487 | 0.46326272 | 0.51840932 | 0.2998597  |
| cg26821681 | 8  | 0.00287555 | 0.48414    | 0.47464003 | 0.25608279 |
| cg02612397 | 6  | 0.01614766 | 0.46314844 | 0.5092237  | 0.35317768 |
| cg16945415 | 3  | 0.00967401 | 0.58416944 | 0.58446096 | 0.41347863 |
| cg17389956 | 12 | 0.00243597 | 0.32206584 | 0.29343255 | 0.17944683 |
| cg08913523 | 8  | 0.00118039 | 0.65626017 | 0.55988584 | 0.31859393 |
| cg17534999 | 11 | 0.03515143 | 0.61474163 | 0.61036988 | 0.4802079  |
| cg16652303 | 11 | 0.01317021 | 0.60631944 | 0.61758598 | 0.41901386 |
| cg17273911 | 11 | 0.01689306 | 0.48105422 | 0.50985762 | 0.36075932 |
| cg17888985 | 10 | 0.00375204 | 0.3638789  | 0.34213982 | 0.20672151 |
| cg20143985 | 10 | 0.01145563 | 0.47554952 | 0.44624317 | 0.34443746 |
| cg19526685 | 8  | 0.01933502 | 0.53204622 | 0.56401675 | 0.33868087 |
| cg14213105 | 9  | 0.02917135 | 0.67270024 | 0.68363302 | 0.52160246 |
| cg20708282 | 5  | 0.00715821 | 0.75732254 | 0.7317392  | 0.57615508 |
| cg12495090 | 2  | 0.03946158 | 0.36315869 | 0.35067559 | 0.22833453 |
| cg16723381 | 2  | 0.01616965 | 0.45276914 | 0.51434086 | 0.34901674 |

|            |    |            |            |            |            |
|------------|----|------------|------------|------------|------------|
| cg16578085 | 4  | 0.00084118 | 0.71792112 | 0.65219393 | 0.39978787 |
| cg27228272 | 2  | 0.00578063 | 0.55594673 | 0.50077426 | 0.39664061 |
| cg01495299 | 8  | 0.02492359 | 0.72326121 | 0.76172106 | 0.58595439 |
| cg18334977 | 3  | 0.00142756 | 0.77168753 | 0.74505352 | 0.56165564 |
| cg17709804 | 11 | 0.04539328 | 0.73034354 | 0.74409995 | 0.62664564 |
| cg25607177 | 11 | 0.03710592 | 0.68230413 | 0.70558966 | 0.55067213 |
| cg07318609 | 10 | 0.025223   | 0.50696595 | 0.57581314 | 0.40537964 |
| cg22950831 | 10 | 0.00073118 | 0.87594239 | 0.73970112 | 0.59886534 |
| cg17588094 | 8  | 0.00381594 | 0.8037784  | 0.80272477 | 0.66458509 |
| cg22881265 | 3  | 0.03659438 | 0.47145826 | 0.48219233 | 0.34783346 |
| cg20475082 | 2  | 0.01235814 | 0.61352193 | 0.61013195 | 0.4560283  |
| cg15331705 | 8  | 0.00763406 | 0.46502318 | 0.44563979 | 0.24904889 |
| cg04795044 | 3  | 0.02715108 | 0.87259983 | 0.85230725 | 0.75147469 |
| cg23229770 | 2  | 0.00857669 | 0.63707057 | 0.6615475  | 0.46230605 |
| cg04998379 | 4  | 0.01506509 | 0.66780406 | 0.71334709 | 0.5255353  |
| cg17477578 | 8  | 0.00079512 | 0.68811645 | 0.53754439 | 0.35699097 |
| cg16434510 | 8  | 0.03052319 | 0.73096985 | 0.68864995 | 0.56782074 |
| cg09187338 | 7  | 0.01130304 | 0.56309377 | 0.53927769 | 0.39994933 |
| cg00228735 | 7  | 0.03009647 | 0.62108489 | 0.65895548 | 0.51124038 |
| cg21211664 | 9  | 0.02190777 | 0.72446774 | 0.7596721  | 0.59863359 |
| cg21551253 | 12 | 0.00538904 | 0.59432883 | 0.62195889 | 0.48089516 |
| cg11225089 | 5  | 0.00223182 | 0.73217028 | 0.68095785 | 0.52472408 |
| cg01645729 | 2  | 0.00233734 | 0.43806699 | 0.45876962 | 0.20765743 |
| cg13363575 | 2  | 0.0108906  | 0.42407712 | 0.68107603 | 0.57250692 |
| cg05189730 | 10 | 0.00281199 | 0.62713708 | 0.63922153 | 0.49917906 |
| cg11161597 | 12 | 0.00428303 | 0.64911464 | 0.65184217 | 0.51304803 |
| cg11367260 | 10 | 0.03477069 | 0.6136375  | 0.636625   | 0.50593418 |
| cg01577029 | 12 | 0.00233298 | 0.64060804 | 0.57394607 | 0.47271347 |
| cg08634598 | 12 | 0.03929291 | 0.54179256 | 0.50966546 | 0.40671266 |
| cg00792107 | 12 | 0.02549971 | 0.4860534  | 0.50492136 | 0.38302095 |
| cg07095347 | 6  | 0.00796332 | 0.49125188 | 0.48525609 | 0.30850497 |
| cg06455180 | 10 | 0.01485881 | 0.66173173 | 0.65911541 | 0.55838408 |
| cg01342115 | 3  | 0.03488893 | 0.40444067 | 0.39710838 | 0.29628111 |
| cg24686551 | 3  | 0.00703549 | 0.77107953 | 0.74599563 | 0.52964033 |
| cg05810177 | 7  | 0.00355472 | 0.76958029 | 0.76478348 | 0.62241742 |
| cg16347123 | 7  | 0.00247734 | 0.36453677 | 0.34911507 | 0.23516502 |
| cg19549902 | 7  | 0.00219711 | 0.87317128 | 0.88439827 | 0.74047306 |
| cg16408820 | 8  | 0.00070678 | 0.90032007 | 0.83002407 | 0.71074551 |
| cg14031473 | 9  | 0.01580766 | 0.51759286 | 0.52700244 | 0.37423645 |
| cg07243202 | 8  | 0.0008947  | 0.61079537 | 0.5220957  | 0.31853464 |
| cg01830023 | 5  | 0.00358374 | 0.57656964 | 0.56931054 | 0.34039688 |
| cg15128679 | 5  | 0.00143343 | 0.26166431 | 0.23467089 | 0.1267986  |
| cg22192489 | 5  | 0.00127413 | 0.60005367 | 0.55071517 | 0.26613957 |
| cg14671011 | 5  | 0.00177922 | 0.775684   | 0.7427566  | 0.54402423 |
| cg02104392 | 2  | 0.00081789 | 0.84037707 | 0.79890275 | 0.65548542 |
| cg24822529 | 5  | 0.00065949 | 0.544361   | 0.33594126 | 0.210375   |

|            |    |            |            |            |            |
|------------|----|------------|------------|------------|------------|
| cg02395454 | 11 | 0.00290723 | 0.40355086 | 0.42461763 | 0.27721898 |
| cg18765405 | 5  | 0.00100561 | 0.76248377 | 0.70580663 | 0.54080227 |
| cg22716280 | 10 | 0.0048909  | 0.54517671 | 0.53702087 | 0.43401102 |
| cg01384319 | 2  | 0.00772025 | 0.71105593 | 0.76286612 | 0.59663733 |
| cg26922854 | 6  | 0.02106058 | 0.58965999 | 0.55981838 | 0.44838267 |
| cg16792071 | 10 | 0.00109306 | 0.48788535 | 0.46385251 | 0.35968894 |
| cg02314201 | 10 | 0.00345314 | 0.64792625 | 0.77998557 | 0.52618499 |
| cg08267250 | 10 | 0.00104158 | 0.30170073 | 0.27280444 | 0.13909775 |
| cg03183618 | 2  | 0.00101054 | 0.71980343 | 0.64245981 | 0.52784393 |
| cg02142926 | 6  | 0.00207423 | 0.573971   | 0.50480824 | 0.33472154 |
| cg16001689 | 6  | 0.00513872 | 0.58355662 | 0.55407557 | 0.32776323 |
| cg17051543 | 10 | 0.03434255 | 0.52018698 | 0.55064894 | 0.40312645 |
| cg09932730 | 7  | 0.01340049 | 0.44370521 | 0.40103525 | 0.28355845 |
| cg18914751 | 5  | 0.00165724 | 0.85108693 | 0.79443333 | 0.69060169 |
| cg01185573 | 3  | 0.00372084 | 0.64631031 | 0.64142023 | 0.53260499 |
| cg13375466 | 8  | 0.01494119 | 0.45623676 | 0.66840176 | 0.56777576 |
| cg07217824 | 7  | 0.00425638 | 0.54622375 | 0.62067011 | 0.35314547 |
| cg25398315 | 8  | 0.00336153 | 0.52853751 | 0.54312817 | 0.40298738 |
| cg19350115 | 6  | 0.01398104 | 0.8174851  | 0.78451389 | 0.6726589  |
| cg00688895 | 7  | 0.00857662 | 0.37335012 | 0.37361947 | 0.26749354 |
| cg11678250 | 7  | 0.01019185 | 0.69811674 | 0.69131135 | 0.52802164 |
| cg13638282 | 9  | 0.00065949 | 0.82422769 | 0.6974666  | 0.55227864 |
| cg00927256 | 2  | 0.00552206 | 0.71554125 | 0.72388146 | 0.58067417 |
| cg25388800 | 5  | 0.00405622 | 0.51679208 | 0.48348516 | 0.21519368 |
| cg20470975 | 6  | 0.01760238 | 0.70674542 | 0.73565522 | 0.60302788 |
| cg11013714 | 3  | 0.00066232 | 0.82131192 | 0.74343506 | 0.63712097 |
| cg13688783 | 9  | 0.00769304 | 0.50792011 | 0.52446481 | 0.40720884 |
| cg08832234 | 8  | 0.00109888 | 0.62061966 | 0.63165943 | 0.5088875  |
| cg27200630 | 3  | 0.01975439 | 0.46214357 | 0.4604085  | 0.31687788 |
| cg15649384 | 2  | 0.02214521 | 0.70965345 | 0.71912423 | 0.59516909 |
| cg07708521 | 5  | 0.00217555 | 0.84152513 | 0.74913111 | 0.63058834 |
| cg22642485 | 5  | 0.01096175 | 0.55631458 | 0.52969953 | 0.33774226 |
| cg07285237 | 6  | 0.00065949 | 0.72045721 | 0.6166704  | 0.36548106 |
| cg14223856 | 9  | 0.00076471 | 0.75249404 | 0.66337094 | 0.5380302  |
| cg14462040 | 9  | 0.04256022 | 0.65243994 | 0.67831728 | 0.53926266 |
| cg08719642 | 9  | 0.01468727 | 0.43883707 | 0.47590576 | 0.33810738 |
| cg19987129 | 6  | 0.04539328 | 0.72354147 | 0.71827436 | 0.60613236 |
| cg05219445 | 6  | 0.02155924 | 0.50052283 | 0.55638044 | 0.37865368 |
| cg14534848 | 9  | 0.00485228 | 0.24292866 | 0.25296105 | 0.1326648  |
| cg15812586 | 7  | 0.00113577 | 0.73457983 | 0.64033561 | 0.35819939 |
| cg13306815 | 6  | 0.00065949 | 0.86387318 | 0.76436334 | 0.65279505 |
| cg12895857 | 6  | 0.00081599 | 0.80184411 | 0.71613398 | 0.60580577 |
| cg23500924 | 5  | 0.04902903 | 0.39321959 | 0.38958409 | 0.27679994 |
| cg26994377 | 4  | 0.00150458 | 0.34798043 | 0.27935558 | 0.15885382 |
| cg14699112 | 4  | 0.00173267 | 0.80460489 | 0.8573036  | 0.69742986 |
| cg05979766 | 5  | 0.00112828 | 0.43103048 | 0.32015624 | 0.15458774 |



|            |   |            |            |            |            |
|------------|---|------------|------------|------------|------------|
| cg22929787 | 5 | 0.00156239 | 0.4844725  | 0.42425352 | 0.25953288 |
| cg21550107 | 5 | 0.00828598 | 0.66437655 | 0.67256896 | 0.53479527 |
| cg09599062 | 3 | 0.01057629 | 0.65165316 | 0.63753856 | 0.48110386 |
| cg22822656 | 8 | 0.01384716 | 0.34701616 | 0.35213954 | 0.2037131  |
| cg07271186 | 7 | 0.01378835 | 0.4122685  | 0.42128573 | 0.28970843 |
| cg11324467 | 8 | 0.00805596 | 0.64906959 | 0.58500394 | 0.46177672 |
| cg26283879 | 8 | 0.04319217 | 0.69444411 | 0.69373326 | 0.54544844 |
| cg20203768 | 8 | 0.00125711 | 0.49946311 | 0.50450994 | 0.39941168 |
| cg21200085 | 1 | 0.02743413 | 0.38127029 | 0.40139264 | 0.27754057 |
| cg19145082 | 3 | 0.00130462 | 0.34586848 | 0.2976081  | 0.18126085 |
| cg17796982 | 8 | 0.01890283 | 0.71483107 | 0.71899508 | 0.58269502 |
| cg10755035 | 8 | 0.01317683 | 0.38059492 | 0.38109501 | 0.26753814 |
| cg18198461 | 8 | 0.00119376 | 0.40202414 | 0.39872666 | 0.2714438  |
| cg12192282 | 2 | 0.00132036 | 0.66040055 | 0.62357875 | 0.38786872 |
| cg04035553 | 8 | 0.00287555 | 0.48623054 | 0.4502742  | 0.28067296 |
| cg01771479 | 8 | 0.01825754 | 0.5881837  | 0.62565005 | 0.47719373 |
| cg17779002 | 8 | 0.01305145 | 0.6342185  | 0.64707907 | 0.4759964  |
| cg04021592 | 2 | 0.01907154 | 0.37062956 | 0.33307634 | 0.21662237 |
| cg19266329 | 1 | 0.00248044 | 0.57058519 | 0.54278907 | 0.37358383 |
| cg02463513 | 3 | 0.0011104  | 0.91171013 | 0.88450895 | 0.77551185 |
| cg26905281 | 8 | 0.02169667 | 0.43545328 | 0.44740734 | 0.32817711 |
| cg20724214 | 3 | 0.02122541 | 0.32868799 | 0.33588173 | 0.22290906 |
| cg25503888 | 3 | 0.02463599 | 0.40871309 | 0.44497695 | 0.30849002 |
| cg09120877 | 1 | 0.00670577 | 0.52245889 | 0.5571225  | 0.38520474 |
| cg20168495 | 4 | 0.00211366 | 0.82957524 | 0.80061501 | 0.65723678 |
| cg01903799 | 4 | 0.00591291 | 0.67787369 | 0.68469493 | 0.50890737 |
| cg16247269 | 5 | 0.00318676 | 0.61033723 | 0.60233527 | 0.49521388 |
| cg03772020 | 6 | 0.00194312 | 0.78549837 | 0.7714611  | 0.41131684 |
| cg09714315 | 2 | 0.03265907 | 0.68525304 | 0.75743788 | 0.56778157 |
| cg11603406 | 7 | 0.00913085 | 0.57511915 | 0.57734064 | 0.47411277 |
| cg26613811 | 7 | 0.00593649 | 0.43703517 | 0.51086591 | 0.28011757 |
| cg01195545 | 7 | 0.01736212 | 0.6493477  | 0.67559716 | 0.48340661 |
| cg12810503 | 7 | 0.02521286 | 0.57428751 | 0.59658093 | 0.44242365 |
| cg00252472 | 6 | 0.03221861 | 0.40910944 | 0.44305805 | 0.27793251 |
| cg24085232 | 5 | 0.00663444 | 0.63218031 | 0.64984758 | 0.53032284 |
| cg04134096 | 3 | 0.00067859 | 0.75270036 | 0.67976993 | 0.56023396 |
| cg07201475 | 2 | 0.00832752 | 0.64428432 | 0.55951323 | 0.41530339 |
| cg08529744 | 1 | 0.00098204 | 0.6327911  | 0.58636129 | 0.46103296 |
| cg07092896 | 2 | 0.00471011 | 0.57401881 | 0.62309128 | 0.45261804 |
| cg08737338 | 2 | 0.0042395  | 0.72993318 | 0.72534342 | 0.58295415 |
| cg07089056 | 3 | 0.00548311 | 0.35846759 | 0.38480864 | 0.24052549 |
| cg10132704 | 7 | 0.00593649 | 0.7309637  | 0.77055964 | 0.61243342 |
| cg21502476 | 3 | 0.04243997 | 0.4747159  | 0.48138372 | 0.33888265 |
| cg26875626 | 4 | 0.04879812 | 0.77334248 | 0.81628622 | 0.66526639 |
| cg00399683 | 7 | 0.01580766 | 0.82717859 | 0.83125223 | 0.68949332 |
| cg05662444 | 5 | 0.01506509 | 0.59527833 | 0.65654945 | 0.46100344 |

|            |   |            |            |            |            |
|------------|---|------------|------------|------------|------------|
| cg16295461 | 4 | 0.00352201 | 0.63990314 | 0.59079011 | 0.46240251 |
| cg00786237 | 3 | 0.00468024 | 0.63295188 | 0.59645679 | 0.48159605 |
| cg03252770 | 4 | 0.00283173 | 0.50517779 | 0.4612502  | 0.27647177 |
| cg00168634 | 4 | 0.01093903 | 0.44124714 | 0.41918623 | 0.2728709  |
| cg08894020 | 5 | 0.00651383 | 0.57345993 | 0.65715413 | 0.46076332 |
| cg25102742 | 7 | 0.02830718 | 0.63442371 | 0.66285076 | 0.4963754  |
| cg00096536 | 4 | 0.02233892 | 0.43114943 | 0.40534259 | 0.25341198 |
| cg19748027 | 5 | 0.00579556 | 0.70718375 | 0.75465011 | 0.56984174 |
| cg06361606 | 1 | 0.00075494 | 0.4716409  | 0.35375382 | 0.16549667 |
| cg03831405 | 7 | 0.00912728 | 0.69708962 | 0.68572347 | 0.57631584 |
| cg23697406 | 7 | 0.00139783 | 0.85008741 | 0.80672153 | 0.68007925 |
| cg03573168 | 7 | 0.01276611 | 0.49474883 | 0.50031257 | 0.39416319 |
| cg20685713 | 1 | 0.00183809 | 0.61404937 | 0.58270965 | 0.43811552 |
| cg25343618 | 1 | 0.00512138 | 0.37999247 | 0.29080326 | 0.18978631 |
| cg05612608 | 3 | 0.01956069 | 0.72410065 | 0.72906967 | 0.59017735 |
| cg00345744 | 7 | 0.03241445 | 0.51467383 | 0.49355758 | 0.36535602 |
| cg15688980 | 3 | 0.0008696  | 0.82354236 | 0.76545762 | 0.66411474 |
| cg26448394 | 4 | 0.01031494 | 0.49349406 | 0.48799803 | 0.31510246 |
| cg25024214 | 1 | 0.00118326 | 0.75051533 | 0.74523821 | 0.62188845 |
| cg25028404 | 1 | 0.00444287 | 0.6769938  | 0.6694228  | 0.50417775 |
| cg25252017 | 6 | 0.00117894 | 0.86087875 | 0.83794039 | 0.73090951 |
| cg11763066 | 6 | 0.00749271 | 0.3785448  | 0.35061827 | 0.21760342 |
| cg16223546 | 5 | 0.00260155 | 0.66062307 | 0.69598776 | 0.41687887 |
| cg01068621 | 1 | 0.00109306 | 0.88235635 | 0.86313643 | 0.73624921 |
| cg04500909 | 5 | 0.00075494 | 0.879225   | 0.81870809 | 0.68141942 |
| cg00975624 | 3 | 0.00094083 | 0.66346253 | 0.59138944 | 0.34339672 |
| cg14217495 | 1 | 0.01314425 | 0.58808641 | 0.60745539 | 0.43260736 |
| cg17033891 | 3 | 0.00170239 | 0.68322077 | 0.67112319 | 0.36479158 |
| cg05581878 | 3 | 0.00132756 | 0.72721162 | 0.6014133  | 0.45201231 |
| cg02682520 | 5 | 0.00608343 | 0.29884575 | 0.33364214 | 0.17481647 |
| cg13423054 | 3 | 0.0011159  | 0.82417068 | 0.7730298  | 0.65980508 |
| cg21832142 | 3 | 0.00072814 | 0.47199109 | 0.35628294 | 0.2206262  |
| cg21758140 | 2 | 0.01126796 | 0.45685957 | 0.48072642 | 0.32497265 |
| cg24525138 | 3 | 0.01783758 | 0.59936236 | 0.6026519  | 0.48180137 |
| cg25831439 | 2 | 0.01884397 | 0.61230237 | 0.63191815 | 0.43639749 |
| cg11141696 | 1 | 0.00189637 | 0.86721404 | 0.86771915 | 0.75277729 |
| cg27227317 | 2 | 0.00078196 | 0.60921632 | 0.56946812 | 0.3542779  |
| cg12341429 | 2 | 0.00065949 | 0.69224418 | 0.53788002 | 0.43379885 |
| cg02104138 | 5 | 0.03954748 | 0.67276405 | 0.69380328 | 0.52403949 |
| cg26338202 | 6 | 0.04291975 | 0.58614118 | 0.54993656 | 0.40876028 |
| cg20867674 | 6 | 0.00912728 | 0.54998498 | 0.54836421 | 0.39254504 |
| cg08510178 | 6 | 0.00670817 | 0.48823545 | 0.50906003 | 0.34919234 |
| cg16721489 | 2 | 0.00159601 | 0.64428151 | 0.60837503 | 0.46320511 |
| cg06500090 | 6 | 0.01332867 | 0.73622956 | 0.72200931 | 0.58221113 |
| cg00386035 | 6 | 0.02042436 | 0.8297058  | 0.84061598 | 0.7013696  |
| cg00121876 | 6 | 0.00383861 | 0.85424369 | 0.83057962 | 0.68687382 |

|            |   |            |            |            |            |
|------------|---|------------|------------|------------|------------|
| cg27325820 | 5 | 0.0103956  | 0.75022822 | 0.68844915 | 0.5448872  |
| cg16383005 | 6 | 0.00213077 | 0.61208514 | 0.58233767 | 0.47521791 |
| cg26954951 | 6 | 0.01206219 | 0.66635799 | 0.676543   | 0.50161171 |
| cg19445758 | 6 | 0.00844494 | 0.62041429 | 0.60163189 | 0.43079537 |
| cg11942594 | 3 | 0.0132124  | 0.796172   | 0.82188759 | 0.64384548 |
| cg04728978 | 2 | 0.00849487 | 0.67475565 | 0.72539157 | 0.57038556 |
| cg20432671 | 1 | 0.01783758 | 0.52985161 | 0.52455513 | 0.37402043 |
| cg12708109 | 1 | 0.00780052 | 0.50193406 | 0.55738568 | 0.38292969 |
| cg01813280 | 6 | 0.0118001  | 0.70108734 | 0.78276471 | 0.53931845 |
| cg08406698 | 6 | 0.048539   | 0.67758195 | 0.65514284 | 0.54009166 |
| cg21002542 | 6 | 0.01344244 | 0.7398416  | 0.70593874 | 0.59455097 |
| cg24104268 | 6 | 0.0102099  | 0.50231119 | 0.53506809 | 0.38334142 |
| cg14580747 | 3 | 0.03204666 | 0.42973526 | 0.46510856 | 0.28884183 |
| cg10703884 | 3 | 0.00930663 | 0.37885879 | 0.43694149 | 0.25311231 |
| cg22453826 | 6 | 0.00065949 | 0.70057729 | 0.60032922 | 0.49378493 |
| cg06853836 | 6 | 0.00106261 | 0.60390927 | 0.52754536 | 0.41663465 |
| cg24939196 | 6 | 0.00104158 | 0.57555821 | 0.53414116 | 0.3067785  |
| cg08866665 | 6 | 0.00367708 | 0.51648609 | 0.49221766 | 0.32785842 |
| cg23143090 | 6 | 0.00155548 | 0.56666647 | 0.58563082 | 0.36189369 |
| cg22006060 | 4 | 0.00146376 | 0.3182171  | 0.30020005 | 0.12918092 |
| cg04398893 | 6 | 0.00077468 | 0.87602033 | 0.81255095 | 0.69404062 |
| cg05935904 | 6 | 0.01019185 | 0.55251938 | 0.55044136 | 0.35406627 |
| cg01766850 | 6 | 0.02435054 | 0.5333833  | 0.57399908 | 0.36837356 |
| cg02360002 | 6 | 0.00855749 | 0.80985181 | 0.81428665 | 0.68655258 |
| cg12439157 | 1 | 0.03860148 | 0.80403632 | 0.80139954 | 0.69523505 |
| cg03292222 | 5 | 0.02616513 | 0.40604039 | 0.4684287  | 0.30398644 |
| cg01423389 | 3 | 0.00113188 | 0.65972702 | 0.67093939 | 0.54603136 |
| cg13945880 | 5 | 0.00065949 | 0.86061181 | 0.8003082  | 0.6597249  |
| cg05468458 | 5 | 0.00077361 | 0.80749763 | 0.7358378  | 0.59974532 |
| cg20952257 | 5 | 0.02357584 | 0.44567045 | 0.39542582 | 0.28311496 |
| cg24114813 | 5 | 0.00857076 | 0.77583212 | 0.79190972 | 0.62675969 |
| cg01905967 | 5 | 0.0012838  | 0.58431525 | 0.54041054 | 0.35211096 |
| cg24465329 | 2 | 0.00642316 | 0.58106615 | 0.53836243 | 0.43094475 |
| cg11079129 | 5 | 0.02099588 | 0.39450731 | 0.4266913  | 0.29033278 |
| cg05234035 | 5 | 0.01050457 | 0.63720268 | 0.67018703 | 0.52006541 |
| cg13313423 | 5 | 0.02658729 | 0.72231141 | 0.71398753 | 0.58259125 |
| cg00321614 | 5 | 0.01533394 | 0.37713497 | 0.40971035 | 0.26339087 |
| cg26473548 | 5 | 0.00112679 | 0.44603854 | 0.41879409 | 0.26896703 |
| cg14746387 | 5 | 0.01492665 | 0.81456803 | 0.8591458  | 0.70906096 |
| cg18234224 | 1 | 0.00083771 | 0.90455712 | 0.87768793 | 0.71797255 |
| cg26355232 | 2 | 0.01359116 | 0.72875858 | 0.72790872 | 0.62509779 |
| cg05871756 | 5 | 0.00260155 | 0.53050769 | 0.46883935 | 0.31330197 |
| cg23091549 | 1 | 0.00181052 | 0.76218097 | 0.69894551 | 0.59644958 |
| cg11470941 | 4 | 0.03832563 | 0.63004013 | 0.61699778 | 0.47000955 |
| cg02307239 | 4 | 0.01807343 | 0.3981008  | 0.40579802 | 0.29637868 |
| cg04840702 | 4 | 0.01422483 | 0.77702115 | 0.79499752 | 0.66928409 |

|            |   |            |            |            |            |
|------------|---|------------|------------|------------|------------|
| cg13401079 | 4 | 0.00381021 | 0.47674274 | 0.48152627 | 0.3078207  |
| cg24530432 | 4 | 0.0113406  | 0.61982547 | 0.61269922 | 0.50405247 |
| cg00070383 | 4 | 0.00576931 | 0.56395412 | 0.67834903 | 0.46079997 |
| cg05191919 | 5 | 0.01183547 | 0.38929118 | 0.3504646  | 0.21684116 |
| cg26113233 | 5 | 0.00065949 | 0.71145727 | 0.61379271 | 0.45762365 |
| cg19807286 | 5 | 0.00186784 | 0.84408818 | 0.81699895 | 0.69334706 |
| cg10256255 | 2 | 0.00129726 | 0.8694677  | 0.88540625 | 0.7420845  |
| cg06609094 | 4 | 0.02466633 | 0.35271869 | 0.41282204 | 0.24923684 |
| cg07240834 | 4 | 0.00913085 | 0.26625712 | 0.27700129 | 0.16306063 |
| cg19867579 | 2 | 0.0009934  | 0.63548832 | 0.51986698 | 0.33590458 |
| cg18526008 | 3 | 0.00973492 | 0.47042208 | 0.51048584 | 0.30244801 |
| cg18475969 | 3 | 0.01276611 | 0.31367135 | 0.33096222 | 0.20857653 |
| cg13401658 | 2 | 0.00420024 | 0.84826139 | 0.8053365  | 0.68223    |
| cg07484739 | 2 | 0.00065949 | 0.76857874 | 0.5877745  | 0.38722572 |
| cg06065019 | 2 | 0.00065949 | 0.41998578 | 0.31816852 | 0.1931315  |
| cg24045357 | 2 | 0.00076043 | 0.62908407 | 0.56538647 | 0.31282857 |
| cg10606620 | 4 | 0.00117894 | 0.86245911 | 0.82067038 | 0.69827701 |
| cg09264231 | 1 | 0.02514684 | 0.61990706 | 0.63578471 | 0.44253002 |
| cg16346032 | 1 | 0.02265546 | 0.7047913  | 0.692595   | 0.52700625 |
| cg08943293 | 1 | 0.02711474 | 0.72740621 | 0.73567405 | 0.58200823 |
| cg04446653 | 3 | 0.00244887 | 0.36219139 | 0.41701954 | 0.20284027 |
| cg17126947 | 4 | 0.00255774 | 0.79793006 | 0.78737804 | 0.60907185 |
| cg23170646 | 4 | 0.01293322 | 0.46161981 | 0.49611815 | 0.31471509 |
| cg13612936 | 2 | 0.00441677 | 0.31917227 | 0.34430655 | 0.21686706 |
| cg22293458 | 3 | 0.00531964 | 0.47896587 | 0.54372919 | 0.33604172 |
| cg04657325 | 4 | 0.01665976 | 0.23785773 | 0.24869204 | 0.13657243 |
| cg18518916 | 4 | 0.03020815 | 0.70611797 | 0.75346565 | 0.59769139 |
| cg14054279 | 3 | 0.00065949 | 0.74479604 | 0.63688412 | 0.49212074 |
| cg20965866 | 4 | 0.00325324 | 0.8580232  | 0.85991458 | 0.74786932 |
| cg04156889 | 3 | 0.00260306 | 0.27585925 | 0.25259265 | 0.13709018 |
| cg10168494 | 3 | 0.01870855 | 0.67127261 | 0.68283961 | 0.52442087 |
| cg13427361 | 4 | 0.0160141  | 0.67502343 | 0.64695318 | 0.47115088 |
| cg03466587 | 3 | 0.00243686 | 0.3848916  | 0.2879519  | 0.1775529  |
| cg12307200 | 3 | 0.00182941 | 0.55413772 | 0.43316208 | 0.32696538 |
| cg04810745 | 2 | 0.0011159  | 0.84741863 | 0.75192332 | 0.62725659 |
| cg16652387 | 4 | 0.03960534 | 0.74611591 | 0.73273389 | 0.59792492 |
| cg27621721 | 3 | 0.00065949 | 0.66569452 | 0.51540173 | 0.33460096 |
| cg25568241 | 3 | 0.00655853 | 0.64849762 | 0.58185446 | 0.48118847 |
| cg12591668 | 1 | 0.00237543 | 0.80076991 | 0.7326863  | 0.57758452 |
| cg07779313 | 2 | 0.02265145 | 0.56113438 | 0.52725536 | 0.42114173 |
| cg23542902 | 3 | 0.00076912 | 0.41328339 | 0.31850527 | 0.17743866 |
| cg23192683 | 3 | 0.03087305 | 0.68894262 | 0.67396058 | 0.54768553 |
| cg13905238 | 3 | 0.00726745 | 0.51310001 | 0.53138721 | 0.34330906 |
| cg14653136 | 1 | 0.00318831 | 0.37402319 | 0.43252264 | 0.24341373 |
| cg00151251 | 2 | 0.0122594  | 0.4142203  | 0.45888147 | 0.30143913 |
| cg09517106 | 1 | 0.01488167 | 0.45699468 | 0.45801312 | 0.28181032 |

|            |   |            |            |            |            |
|------------|---|------------|------------|------------|------------|
| cg26257082 | 1 | 0.01580766 | 0.30386558 | 0.30758397 | 0.15657457 |
| cg27058077 | 1 | 0.00686574 | 0.64852363 | 0.63667851 | 0.48587843 |
| cg15647364 | 1 | 0.0438072  | 0.46123595 | 0.50076977 | 0.33858749 |
| cg12082516 | 1 | 0.00462871 | 0.67445877 | 0.64289772 | 0.51704015 |
| cg22534374 | 1 | 0.00068904 | 0.80346787 | 0.65386327 | 0.44790417 |
| cg00387090 | 1 | 0.01533364 | 0.68188914 | 0.676107   | 0.47264041 |
| cg17836014 | 2 | 0.02348349 | 0.78247864 | 0.75732275 | 0.654301   |
| cg06215984 | 1 | 0.00857662 | 0.47904959 | 0.48214907 | 0.28935356 |
| cg12801030 | 1 | 0.01096356 | 0.6716114  | 0.66933691 | 0.50354757 |
| cg11786870 | 1 | 0.0074197  | 0.7204002  | 0.76306632 | 0.53488739 |
| cg02736228 | 1 | 0.01866928 | 0.6259207  | 0.6119299  | 0.50812863 |
| cg09030187 | 1 | 0.0012504  | 0.65230652 | 0.59611953 | 0.44003228 |
| cg16308270 | 1 | 0.00085355 | 0.46272164 | 0.38062993 | 0.24067775 |
| cg13052638 | 1 | 0.00065949 | 0.71872949 | 0.59460272 | 0.40979903 |
| cg02338840 | 2 | 0.00183659 | 0.78997479 | 0.78366784 | 0.62870954 |
| cg05956608 | 1 | 0.03120023 | 0.6241422  | 0.57593696 | 0.46162468 |
| cg13857933 | 1 | 0.0084821  | 0.4158013  | 0.42346427 | 0.23919734 |
| cg15749661 | 2 | 0.0046036  | 0.73362187 | 0.69154817 | 0.59103864 |
| cg10440877 | 2 | 0.00520958 | 0.65352628 | 0.70178502 | 0.51199405 |
| cg19479609 | 2 | 0.00857076 | 0.47668799 | 0.49739006 | 0.31855144 |
| cg22787719 | 1 | 0.02215556 | 0.56792682 | 0.56024381 | 0.42686374 |
| cg12697139 | 1 | 0.00279455 | 0.5766262  | 0.66313216 | 0.42122573 |
| cg21393051 | 1 | 0.00730525 | 0.45889882 | 0.51498966 | 0.31690144 |
| cg26035071 | 1 | 0.01009664 | 0.70664252 | 0.63449381 | 0.39619414 |
| cg00054639 | 2 | 0.00304655 | 0.2996284  | 0.30867616 | 0.17854007 |
| cg06660522 | 1 | 0.02466633 | 0.75821637 | 0.82916017 | 0.5972318  |
| cg26192309 | 1 | 0.00094183 | 0.80023748 | 0.76611968 | 0.64698112 |
| cg07356549 | 1 | 0.00594191 | 0.5484628  | 0.49718207 | 0.3009263  |
| cg25467833 | 1 | 0.00127427 | 0.51637368 | 0.35633344 | 0.23956267 |
| cg01966974 | 1 | 0.01889561 | 0.67826151 | 0.71190359 | 0.56895107 |
| cg24486958 | 1 | 0.00068904 | 0.62518726 | 0.5267744  | 0.35326926 |
| cg16242653 | 1 | 0.02252189 | 0.35143062 | 0.35229283 | 0.25000276 |
| cg06873024 | 1 | 0.00414415 | 0.7441427  | 0.76894461 | 0.51950186 |
| cg12436772 | 2 | 0.00670577 | 0.77814176 | 0.79311895 | 0.61758657 |
| cg03165356 | 2 | 0.00384818 | 0.55663841 | 0.47812147 | 0.30782094 |
| cg03834467 | 2 | 0.00353204 | 0.83005183 | 0.78137157 | 0.67978393 |
| cg07181395 | 2 | 0.01183547 | 0.41717635 | 0.3982636  | 0.29209323 |
| cg15559833 | 2 | 0.02087024 | 0.42518351 | 0.34341353 | 0.23566415 |
| cg00132972 | 2 | 0.01674385 | 0.61372798 | 0.59413228 | 0.44823557 |
| cg16651768 | 1 | 0.00065949 | 0.71844826 | 0.57534577 | 0.45027867 |
| cg14101940 | 2 | 0.00514    | 0.6727196  | 0.64959861 | 0.54832368 |
| cg06755427 | 2 | 0.00168532 | 0.60690809 | 0.57239677 | 0.41912107 |
| cg00583068 | 1 | 0.00670577 | 0.76545457 | 0.73798464 | 0.57881329 |
| cg06092869 | 1 | 0.00085355 | 0.34189575 | 0.3113995  | 0.19909523 |
| cg09501717 | 2 | 0.00065949 | 0.86060007 | 0.7906922  | 0.66853227 |
| cg25101764 | 2 | 0.0066172  | 0.82533069 | 0.81551207 | 0.66651385 |

|            |   |            |            |            |            |
|------------|---|------------|------------|------------|------------|
| cg02932364 | 1 | 0.00170239 | 0.67442163 | 0.61486216 | 0.47322337 |
| cg17165759 | 1 | 0.00202174 | 0.73371367 | 0.62720615 | 0.51830589 |
| cg07970146 | 2 | 0.00716301 | 0.66269122 | 0.70399697 | 0.51885735 |
| cg01432692 | 1 | 0.00081789 | 0.88325329 | 0.84496701 | 0.67828903 |
| cg04031093 | 1 | 0.00179741 | 0.54924108 | 0.52007084 | 0.27378149 |
| cg13058623 | 1 | 0.02096205 | 0.41884003 | 0.37535302 | 0.23395645 |
| cg03262802 | 2 | 0.0008696  | 0.84017713 | 0.77700403 | 0.63449861 |
| cg10714509 | 1 | 0.00546217 | 0.55726153 | 0.60940947 | 0.4164925  |
| cg10881749 | 1 | 0.00705117 | 0.63517949 | 0.6498834  | 0.47665564 |
| cg13777730 | 1 | 0.02115579 | 0.66126978 | 0.67612481 | 0.45383911 |
| cg26314722 | 1 | 0.00316303 | 0.78322873 | 0.74845327 | 0.54919492 |
| cg25341313 | 1 | 0.00377723 | 0.46901876 | 0.44567268 | 0.28337824 |
| cg20155035 | 1 | 0.01896129 | 0.84144667 | 0.82231819 | 0.71547498 |
| cg05926640 | 1 | 0.00849487 | 0.76169719 | 0.79449278 | 0.54183663 |
| cg18530568 | 2 | 0.00792881 | 0.68440914 | 0.71287457 | 0.488095   |
| cg14127046 | 2 | 0.00806395 | 0.86531522 | 0.8593835  | 0.74841051 |
| cg15867307 | 2 | 0.00065949 | 0.65040274 | 0.48922227 | 0.36665785 |
| cg22304705 | 2 | 0.00074016 | 0.90941801 | 0.82960617 | 0.71093372 |
| cg04838191 | 2 | 0.00109606 | 0.8967991  | 0.88803525 | 0.78344244 |
| cg03190769 | 2 | 0.01296171 | 0.33238991 | 0.33591288 | 0.20758652 |
| cg18141622 | 2 | 0.04320111 | 0.64998185 | 0.65829567 | 0.50668251 |
| cg07480446 | 2 | 0.00132756 | 0.83999984 | 0.79400939 | 0.68918471 |
| cg06761220 | 2 | 0.00065949 | 0.74542607 | 0.65310873 | 0.50307269 |
| cg16640358 | 2 | 0.01583141 | 0.46309049 | 0.46396065 | 0.32544082 |
| cg08454015 | 1 | 0.0012504  | 0.81931197 | 0.75364721 | 0.57833876 |
| cg15808795 | 2 | 0.00183809 | 0.84666793 | 0.77961212 | 0.67719184 |
| cg24232510 | 2 | 0.00065949 | 0.82346865 | 0.69081075 | 0.53529571 |
| cg11792671 | 2 | 0.04716956 | 0.56381264 | 0.6014022  | 0.44977643 |
| cg00248242 | 2 | 0.00763406 | 0.41710732 | 0.37894839 | 0.24775425 |
| cg09499095 | 2 | 0.02980647 | 0.31744361 | 0.34476574 | 0.21626457 |
| cg24980709 | 2 | 0.00073118 | 0.72658548 | 0.623728   | 0.48497303 |
| cg16110704 | 1 | 0.00141131 | 0.4395331  | 0.46013174 | 0.29584876 |
| cg11370814 | 2 | 0.00290723 | 0.60699352 | 0.51683303 | 0.38116522 |
| cg00967073 | 1 | 0.00699558 | 0.36298956 | 0.35405819 | 0.20737106 |
| cg25286679 | 1 | 0.0024732  | 0.6196357  | 0.55178091 | 0.43932562 |
| cg02148612 | 1 | 0.00904235 | 0.50252899 | 0.55318789 | 0.38506508 |
