# Supplementary material for: Differential DNA methylation and expression of inflammatory and zinc transporter genes defines subgroups of osteoarthritic hip patients
Source: PubMed Central journal article supplement (PMC4552898; doi:10.1136/annrheumdis-2014-206752), 2015-04-08
Supplement: annrheumdis-2014-206752-s8.pdf [file annrheumdis-2014-206752-s8.pdf]

**Supplementary Table 4.** List of hypermethylated DMLs in OA hip cluster 2.

| Hypermethylated in OA hip cluster 2 |          |     |            |                     |                           |                           |
|-------------------------------------|----------|-----|------------|---------------------|---------------------------|---------------------------|
| Probe                               | Gene     | CHR | adj.P val  | mean $\beta$<br>NOF | mean $\beta$<br>cluster 1 | mean $\beta$<br>cluster 2 |
| cg04006565                          | A2BP1;A2 | 16  | 0.00626821 | 0.47431908          | 0.479589673               | 0.642442681               |
| cg25710107                          | A2LD1    | 13  | 0.00168532 | 0.33288494          | 0.374014983               | 0.578197911               |
| cg13776095                          | A2LD1;A2 | 13  | 0.00117377 | 0.50176139          | 0.550007564               | 0.687663724               |
| cg07439546                          | ABAT;AB  | 16  | 0.00179741 | 0.29083781          | 0.311020576               | 0.458620744               |
| cg06400857                          | ABCA2;A  | 9   | 0.00220808 | 0.25097072          | 0.239785499               | 0.361063742               |
| cg14151317                          | ABCA2;A  | 9   | 0.00253175 | 0.44913082          | 0.351588157               | 0.627657431               |
| cg01807748                          | ABCA4    | 1   | 0.00430465 | 0.12171182          | 0.095298452               | 0.237625043               |
| cg07372195                          | ABCA5;A  | 17  | 0.00100054 | 0.60985001          | 0.634147407               | 0.815047177               |
| cg21660392                          | ABCA8    | 17  | 0.0106258  | 0.37389018          | 0.392276928               | 0.551651702               |
| cg09330923                          | ABCB8    | 7   | 0.00233298 | 0.6146422           | 0.602164431               | 0.737506678               |
| cg18473642                          | ABCB9;A  | 12  | 0.0022873  | 0.41460194          | 0.376045799               | 0.51984814                |
| cg15656257                          | ABCB9;A  | 12  | 0.04629574 | 0.19542502          | 0.192828921               | 0.301544032               |
| cg06503456                          | ABCC1;A  | 16  | 0.00452348 | 0.22993631          | 0.19001339                | 0.432957911               |
| cg00241432                          | ABCC4;A  | 13  | 0.00255831 | 0.41502837          | 0.459382599               | 0.673754491               |
| cg10311020                          | ABI1;ABI | 10  | 0.00624726 | 0.43681294          | 0.444030625               | 0.623454638               |
| cg15895268                          | ABL2;ABL | 1   | 0.03502085 | 0.36345723          | 0.400702722               | 0.533283983               |
| cg05733497                          | ABLIM2;A | 4   | 0.00074801 | 0.59717169          | 0.623059961               | 0.730911679               |
| cg25046274                          | ABLIM2;A | 4   | 0.01193746 | 0.39120043          | 0.456623031               | 0.570713125               |
| cg23401459                          | ABR;ABR  | 17  | 0.00209427 | 0.74901353          | 0.740475717               | 0.863741606               |
| cg14458783                          | ABR;ABR  | 17  | 0.0041734  | 0.31256713          | 0.276698327               | 0.480803417               |
| cg08458121                          | ABR;ABR  | 17  | 0.00663444 | 0.30773286          | 0.28113315                | 0.456752602               |
| cg04318619                          | ABR;ABR  | 17  | 0.02519732 | 0.27075289          | 0.198636984               | 0.388786052               |
| cg10803453                          | ABR;ABR; | 17  | 0.00161582 | 0.45903084          | 0.504755155               | 0.616332616               |
| cg24439623                          | ABR;ABR; | 17  | 0.03783756 | 0.24631824          | 0.239817707               | 0.346392892               |
| cg10996148                          | ABR;ABR; | 17  | 0.00703549 | 0.29234679          | 0.252763607               | 0.436511606               |
| cg10370025                          | ABR;ABR; | 17  | 0.00119385 | 0.19654698          | 0.191876886               | 0.405409516               |
| cg05633070                          | ABR;ABR; | 17  | 0.00113577 | 0.43764949          | 0.500183456               | 0.635224609               |
| cg24210280                          | ABR;ABR; | 17  | 0.0118868  | 0.4151251           | 0.444276558               | 0.581012483               |
| cg08663298                          | ABTB2    | 11  | 0.00666067 | 0.57149452          | 0.569228596               | 0.694329452               |
| cg04954111                          | ABTB2    | 11  | 0.00590146 | 0.13602838          | 0.131413307               | 0.273571754               |
| cg01369908                          | ABTB2    | 11  | 0.00798569 | 0.50584096          | 0.521953811               | 0.630356627               |
| cg10548708                          | ACAA1;A  | 3   | 0.00189609 | 0.68879915          | 0.677483658               | 0.792547428               |
| cg01760189                          | ACACA;A  | 17  | 0.00146869 | 0.38671456          | 0.422787447               | 0.652892815               |
| cg16822666                          | ACACA;A  | 17  | 0.00197576 | 0.22423123          | 0.217440055               | 0.387433272               |
| cg10458080                          | ACAD10;A | 12  | 0.04937176 | 0.32166355          | 0.340068012               | 0.482784595               |
| cg08931456                          | ACAP2    | 3   | 0.00151706 | 0.44890784          | 0.478527606               | 0.640595932               |
| cg03003335                          | ACAP3    | 1   | 0.01891633 | 0.32665189          | 0.339944598               | 0.496450584               |
| cg19414302                          | ACAP3    | 1   | 0.0011571  | 0.39103345          | 0.44676133                | 0.605158088               |
| cg22675767                          | ACAP3    | 1   | 0.00081413 | 0.24611481          | 0.282856019               | 0.396556841               |
| cg17952826                          | ACAT2    | 6   | 0.02271157 | 0.17076527          | 0.174765354               | 0.279813274               |

|            |          |    |            |            |             |             |
|------------|----------|----|------------|------------|-------------|-------------|
| cg17475583 | ACBD6    | 1  | 0.02195382 | 0.20356383 | 0.147010428 | 0.36632378  |
| cg26142972 | ACCN4;A  | 2  | 0.0016785  | 0.18841554 | 0.192895747 | 0.325596534 |
| cg08172947 | ACO2     | 22 | 0.04194736 | 0.50552433 | 0.489875723 | 0.615021861 |
| cg18180407 | ACOT11;A | 1  | 0.0027878  | 0.25948009 | 0.249029831 | 0.443106385 |
| cg02328793 | ACOT7;A  | 1  | 0.00623418 | 0.45723242 | 0.485290487 | 0.588484351 |
| cg11654006 | ACOT7;A  | 1  | 0.00579556 | 0.24866996 | 0.242056701 | 0.454879089 |
| cg26570804 | ACOT7;A  | 1  | 0.00403008 | 0.26511856 | 0.225585899 | 0.474054079 |
| cg24597207 | ACOX3;A  | 4  | 0.0008696  | 0.56365579 | 0.602891423 | 0.765804851 |
| cg08529267 | ACOX3;A  | 4  | 0.00329066 | 0.43727762 | 0.444647776 | 0.605820299 |
| cg08206079 | ACOX3;A  | 4  | 0.0107931  | 0.49566756 | 0.476363589 | 0.617814288 |
| cg09133485 | ACOX3;A  | 4  | 0.00691903 | 0.39401324 | 0.357550903 | 0.52813479  |
| cg26869512 | ACOX3;A  | 4  | 0.00108946 | 0.41736766 | 0.473968293 | 0.713911833 |
| cg17949316 | ACOX3;A  | 4  | 0.00297992 | 0.50695213 | 0.516659213 | 0.66195499  |
| cg22002216 | ACSF2    | 17 | 0.00171175 | 0.39987338 | 0.44725825  | 0.554362095 |
| cg18038894 | ACSF2    | 17 | 0.00065949 | 0.23175642 | 0.33994089  | 0.47075532  |
| cg14906909 | ACSS3    | 12 | 0.02762555 | 0.36736656 | 0.346378885 | 0.485190117 |
| cg24474409 | ACTR3C;L | 7  | 0.02970062 | 0.38330218 | 0.371219335 | 0.487090783 |
| cg01234517 | ACTR3C;L | 7  | 0.0075368  | 0.35742407 | 0.382205895 | 0.503570247 |
| cg00653455 | ACTR8    | 3  | 0.01219095 | 0.45890384 | 0.421109665 | 0.630707403 |
| cg09648467 | ADAM19   | 5  | 0.00179679 | 0.08985551 | 0.097661256 | 0.202328751 |
| cg26523264 | ADAMTS1  | 19 | 0.01970757 | 0.62438541 | 0.590341956 | 0.727330451 |
| cg12845177 | ADAMTS1  | 19 | 0.00659227 | 0.5127066  | 0.558057188 | 0.728060898 |
| cg06982745 | ADAMTS1  | 10 | 0.02763558 | 0.4787342  | 0.442309782 | 0.587130829 |
| cg24368226 | ADAMTS1  | 15 | 0.00065949 | 0.13514056 | 0.222565196 | 0.336850547 |
| cg21901223 | ADAMTS1  | 5  | 0.00532167 | 0.29697458 | 0.317618668 | 0.423338082 |
| cg17212277 | ADAMTS1  | 5  | 0.00193482 | 0.47283625 | 0.510772593 | 0.643883224 |
| cg27000228 | ADAMTS1  | 5  | 0.00118031 | 0.35625467 | 0.381162116 | 0.50911567  |
| cg10077410 | ADAMTS1  | 15 | 0.00403008 | 0.43227751 | 0.422394827 | 0.547948853 |
| cg13468759 | ADAMTS1  | 9  | 0.00247655 | 0.35462637 | 0.383492193 | 0.625939662 |
| cg18127823 | ADAP1    | 7  | 0.00575746 | 0.30623693 | 0.316107973 | 0.448741814 |
| cg08944086 | ADARB2   | 10 | 0.00193482 | 0.17670048 | 0.206495553 | 0.337100592 |
| cg26361041 | ADARB2   | 10 | 0.03453375 | 0.31125603 | 0.325814823 | 0.455421018 |
| cg16990474 | ADARB2   | 10 | 0.04470828 | 0.39395499 | 0.382104961 | 0.509431607 |
| cg01294521 | ADAT3;SC | 19 | 0.00359124 | 0.38206408 | 0.376304021 | 0.545951858 |
| cg19254118 | ADAT3;SC | 19 | 0.00104158 | 0.48646211 | 0.533645247 | 0.709495296 |
| cg01397065 | ADAT3;SC | 19 | 0.00074016 | 0.26318299 | 0.310493645 | 0.506799547 |
| cg20243900 | ADAT3;SC | 19 | 0.00367708 | 0.45167639 | 0.506757401 | 0.647974588 |
| cg06887224 | ADCY2    | 5  | 0.0107931  | 0.2060656  | 0.199256403 | 0.359900527 |
| cg14418176 | ADCY3    | 2  | 0.00263648 | 0.16494108 | 0.161735216 | 0.300419424 |
| cg10639428 | ADCY3    | 2  | 0.00376781 | 0.21348698 | 0.214416875 | 0.319325831 |
| cg08266286 | ADCY3;AI | 2  | 0.00130383 | 0.13629563 | 0.140262983 | 0.258479181 |
| cg00061520 | ADCY9    | 16 | 0.00317432 | 0.33613984 | 0.425810547 | 0.612680811 |
| cg00162104 | ADD1;AD  | 4  | 0.0048909  | 0.42286633 | 0.408163358 | 0.580778814 |
| cg03532879 | ADIG     | 20 | 0.00170786 | 0.49221002 | 0.548147855 | 0.674087416 |
| cg14271690 | ADIG     | 20 | 0.0035878  | 0.22381879 | 0.207642708 | 0.349902153 |
| cg27392775 | ADIPOR1; | 1  | 0.01137235 | 0.5448716  | 0.550956877 | 0.657024066 |

|            |          |    |            |            |             |             |
|------------|----------|----|------------|------------|-------------|-------------|
| cg19678564 | ADORA1;  | 1  | 0.00569156 | 0.2867513  | 0.255587336 | 0.409052091 |
| cg21083556 | ADSSL1   | 14 | 0.00137603 | 0.34614598 | 0.338189043 | 0.541120111 |
| cg04522949 | ADSSL1;A | 14 | 0.00103808 | 0.41734188 | 0.422467327 | 0.527206746 |
| cg07406289 | AFAP1;AF | 4  | 0.01554011 | 0.21885486 | 0.20396861  | 0.323090303 |
| cg01592387 | AFAP1;AF | 4  | 0.04902903 | 0.45680027 | 0.44783309  | 0.595755582 |
| cg07109358 | AFAP1;AF | 4  | 0.0013661  | 0.32822314 | 0.333502128 | 0.454977487 |
| cg20147046 | AFAP1;AF | 4  | 0.00220808 | 0.32416674 | 0.325091882 | 0.430607149 |
| cg02465859 | AFAP1L2; | 10 | 0.0440672  | 0.2279353  | 0.20445031  | 0.331319433 |
| cg17875845 | AFF1;AFF | 4  | 0.00159552 | 0.35390918 | 0.363106317 | 0.596788874 |
| cg25350306 | AFF3;AFF | 2  | 0.0020873  | 0.19727137 | 0.194383734 | 0.378405967 |
| cg01649623 | AFF3;AFF | 2  | 0.01158752 | 0.15457897 | 0.157165943 | 0.268626968 |
| cg20965469 | AFF3;AFF | 2  | 0.00126337 | 0.6522135  | 0.594538709 | 0.764409552 |
| cg10140126 | AFF3;AFF | 2  | 0.00873782 | 0.4355034  | 0.46855813  | 0.5703987   |
| cg01254170 | AGAP1;A  | 2  | 0.00702677 | 0.34882386 | 0.355082443 | 0.532010575 |
| cg07164047 | AGAP1;A  | 2  | 0.00295373 | 0.43692769 | 0.507297076 | 0.608369535 |
| cg23467747 | AGAP1;A  | 2  | 0.00971274 | 0.65477814 | 0.657172515 | 0.773901919 |
| cg16823042 | AGAP2;LC | 12 | 0.01160447 | 0.22718557 | 0.227164092 | 0.330707673 |
| cg23387569 | AGAP2;LC | 12 | 0.01943805 | 0.2430325  | 0.205642887 | 0.352166743 |
| cg14845962 | AGAP2;LC | 12 | 0.02651696 | 0.14596633 | 0.118760865 | 0.249894937 |
| cg25417842 | AGAP3    | 7  | 0.01430511 | 0.3835687  | 0.360226204 | 0.494625465 |
| cg11817411 | AGAP3;A  | 7  | 0.01956069 | 0.49564516 | 0.488449233 | 0.596778766 |
| cg08321684 | AGER;AG  | 6  | 0.00352201 | 0.30886728 | 0.324428858 | 0.487094553 |
| cg05914981 | AGER;AG  | 6  | 0.00264473 | 0.27241413 | 0.28075241  | 0.400561081 |
| cg01331461 | AGPAT3;A | 21 | 0.0020588  | 0.18500002 | 0.176866375 | 0.291815562 |
| cg19057779 | AGPAT3;A | 21 | 0.02038239 | 0.51471466 | 0.544061861 | 0.665288293 |
| cg12859101 | AGPAT6   | 8  | 0.00211914 | 0.43930381 | 0.460160385 | 0.617324583 |
| cg18272461 | AGRN     | 1  | 0.00597656 | 0.31104854 | 0.302956775 | 0.413403873 |
| cg06712559 | AGRN     | 1  | 0.00073118 | 0.04484806 | 0.075698228 | 0.184536791 |
| cg08057869 | AGXT2L1; | 4  | 0.00227327 | 0.26504484 | 0.232774081 | 0.437697496 |
| cg07181257 | AHDC1    | 1  | 0.00174123 | 0.33454677 | 0.330926763 | 0.503660927 |
| cg11480534 | AHNAK    | 11 | 0.02993615 | 0.24802165 | 0.233203556 | 0.377137385 |
| cg02283949 | AIG1     | 6  | 0.01333054 | 0.21643728 | 0.156926737 | 0.346298545 |
| cg06483820 | AKAP1    | 17 | 0.00129758 | 0.47648293 | 0.507897091 | 0.687727987 |
| cg17133734 | AKAP13;A | 15 | 0.00953692 | 0.24949722 | 0.231183094 | 0.41935841  |
| cg13263323 | AKAP13;A | 15 | 0.00802462 | 0.28126747 | 0.176191389 | 0.392542719 |
| cg13430173 | AKAP2;A  | 9  | 0.01372997 | 0.20419759 | 0.207027256 | 0.35161357  |
| cg25862117 | AKAP7    | 6  | 0.00144772 | 0.1493247  | 0.168075515 | 0.304056295 |
| cg09794444 | AKD1     | 6  | 0.00430465 | 0.63404581 | 0.599673574 | 0.755800833 |
| cg07160992 | AKT1;AKT | 14 | 0.02917135 | 0.36018246 | 0.376288983 | 0.494826167 |
| cg04820159 | AKT1;AKT | 14 | 0.00113577 | 0.13127518 | 0.134877689 | 0.239139646 |
| cg14274357 | AKT1;AKT | 14 | 0.00248015 | 0.32783549 | 0.328090865 | 0.475331321 |
| cg11973514 | AKT3;AKT | 1  | 0.00677233 | 0.74858696 | 0.76353049  | 0.864929607 |
| cg27451508 | ALDH3A1  | 17 | 0.00156869 | 0.59863901 | 0.614095601 | 0.743496873 |
| cg12491555 | ALDH8A1  | 6  | 0.00702785 | 0.21955669 | 0.277693469 | 0.412773725 |
| cg02693227 | ALG1L2   | 3  | 0.04738917 | 0.38063404 | 0.436739922 | 0.589300554 |
| cg18007837 | ALOX12P  | 17 | 0.01020581 | 0.16706025 | 0.147756283 | 0.268473457 |

|            |          |    |            |            |             |             |
|------------|----------|----|------------|------------|-------------|-------------|
| cg11027217 | ALPK1;AL | 4  | 0.00429038 | 0.36073078 | 0.352744458 | 0.463030119 |
| cg00031779 | ALPK2    | 18 | 0.00377723 | 0.2802751  | 0.304473127 | 0.471545452 |
| cg27555092 | ALPK2    | 18 | 0.00167382 | 0.11260307 | 0.115922818 | 0.256429764 |
| cg07910680 | ALPK2    | 18 | 0.00150566 | 0.1881335  | 0.196809555 | 0.35500887  |
| cg27614534 | ALPK2    | 18 | 0.00083551 | 0.53006778 | 0.597630803 | 0.705922948 |
| cg25407077 | ALPK2    | 18 | 0.00359691 | 0.52369163 | 0.546767583 | 0.679108671 |
| cg00894103 | ALPK3    | 15 | 0.02494466 | 0.41245538 | 0.368210799 | 0.524273571 |
| cg26893816 | AMACR;A  | 5  | 0.00841172 | 0.20543367 | 0.201080871 | 0.329506243 |
| cg20406747 | AMHR2;A  | 12 | 0.00173053 | 0.20035447 | 0.220584731 | 0.402236679 |
| cg15616310 | AMOTL1   | 11 | 0.01766834 | 0.1346282  | 0.122836382 | 0.250505882 |
| cg01636354 | AMOTL2   | 3  | 0.00170786 | 0.1474386  | 0.154290998 | 0.262206068 |
| cg08173606 | AMOTL2   | 3  | 0.00263648 | 0.11090519 | 0.110089821 | 0.214979483 |
| cg27565899 | AMPD2;A  | 1  | 0.00067897 | 0.12132633 | 0.163183198 | 0.274609372 |
| cg25772143 | AMPD2;A  | 1  | 0.00126059 | 0.25555033 | 0.263572413 | 0.370015452 |
| cg24435741 | AMPD3    | 11 | 0.04237386 | 0.27593316 | 0.308846999 | 0.451458343 |
| cg22308970 | AMPH;AM  | 7  | 0.0019141  | 0.44619189 | 0.508261063 | 0.626251593 |
| cg06618764 | AMZ1     | 7  | 0.00138618 | 0.33502458 | 0.307201085 | 0.454788245 |
| cg06703803 | ANAPC7   | 12 | 0.00230116 | 0.26735007 | 0.237933728 | 0.474194342 |
| cg25116615 | ANGPT1   | 8  | 0.00401281 | 0.44022858 | 0.472999569 | 0.596406127 |
| cg05234958 | ANK1;AN  | 8  | 0.00291825 | 0.57489521 | 0.576168584 | 0.705812896 |
| cg13555290 | ANK2     | 4  | 0.01807343 | 0.35959126 | 0.298144317 | 0.488359502 |
| cg07677598 | ANK2     | 4  | 0.00169362 | 0.41341817 | 0.416779394 | 0.648634251 |
| cg17665652 | ANK2;AN  | 4  | 0.00536676 | 0.14657919 | 0.088652319 | 0.281993403 |
| cg01497527 | ANKDD1/  | 15 | 0.00295889 | 0.38004964 | 0.381103565 | 0.495874985 |
| cg20647656 | ANKMY1;  | 2  | 0.0011414  | 0.55779107 | 0.586876316 | 0.710741774 |
| cg25810938 | ANKMY1;  | 2  | 0.01580869 | 0.11872078 | 0.099191157 | 0.223079874 |
| cg09420319 | ANKRD11  | 16 | 0.00362881 | 0.26024458 | 0.258298372 | 0.46913423  |
| cg05071195 | ANKRD11  | 16 | 0.01148808 | 0.22593474 | 0.19974317  | 0.339444524 |
| cg08420923 | ANKRD11  | 16 | 0.00703053 | 0.31167492 | 0.283201685 | 0.44772242  |
| cg06567829 | ANKRD11  | 16 | 0.01957672 | 0.35290488 | 0.377232366 | 0.510419103 |
| cg00770754 | ANKRD11  | 16 | 0.00597656 | 0.48942384 | 0.482733671 | 0.615285587 |
| cg03163759 | ANKRD11  | 16 | 0.00488538 | 0.25646517 | 0.239689578 | 0.359577999 |
| cg00488747 | ANKRD11  | 16 | 0.005559   | 0.5895862  | 0.572321832 | 0.738114792 |
| cg09486407 | ANKRD11  | 16 | 0.00104158 | 0.33491258 | 0.392935736 | 0.627910442 |
| cg22889914 | ANKRD2;, | 10 | 0.0009601  | 0.37827404 | 0.432321734 | 0.594284167 |
| cg02950892 | ANKRD2;, | 10 | 0.00143276 | 0.28085281 | 0.329073709 | 0.454929307 |
| cg10343327 | ANKRD2;, | 10 | 0.00107365 | 0.38594537 | 0.442830957 | 0.604168478 |
| cg09114211 | ANKRD23  | 2  | 0.00181052 | 0.5486812  | 0.550928061 | 0.654084962 |
| cg25612428 | ANKRD33  | 5  | 0.00451843 | 0.40992018 | 0.363849008 | 0.523009518 |
| cg07683388 | ANKRD44  | 2  | 0.00520163 | 0.24484314 | 0.226524173 | 0.351574017 |
| cg04869949 | ANKRD44  | 2  | 0.00218291 | 0.56154468 | 0.589290187 | 0.719778428 |
| cg16501561 | ANKRD55  | 5  | 0.02830078 | 0.19330233 | 0.181088302 | 0.344522675 |
| cg03613003 | ANO1;AN  | 11 | 0.00137194 | 0.23184181 | 0.260994012 | 0.468232626 |
| cg15767218 | ANO1;AN  | 11 | 0.00582851 | 0.25531961 | 0.242380151 | 0.435337078 |
| cg13767135 | ANO1;AN  | 11 | 0.02541872 | 0.20014836 | 0.197777027 | 0.303493989 |
| cg04146573 | ANO1;AN  | 11 | 0.00184462 | 0.1170902  | 0.129705153 | 0.232446283 |

|            |          |    |            |            |             |             |
|------------|----------|----|------------|------------|-------------|-------------|
| cg02179492 | ANO1;AN  | 11 | 0.00236311 | 0.55923158 | 0.5800274   | 0.692074326 |
| cg20883194 | ANO6;AN  | 12 | 0.00236311 | 0.11514724 | 0.143584812 | 0.294313331 |
| cg01410615 | ANO7     | 2  | 0.00185385 | 0.14787749 | 0.134583518 | 0.317418362 |
| cg25605313 | ANO8     | 19 | 0.0219159  | 0.15217096 | 0.141229264 | 0.258967636 |
| cg12526923 | ANO8     | 19 | 0.00327469 | 0.21518987 | 0.279558738 | 0.396096697 |
| cg24192660 | ANO8     | 19 | 0.0012838  | 0.1503785  | 0.226541437 | 0.33977312  |
| cg24530041 | ANPEP    | 15 | 0.00329066 | 0.34096255 | 0.378953865 | 0.52154459  |
| cg13042288 | ANPEP    | 15 | 0.00295373 | 0.54065733 | 0.628151485 | 0.74524392  |
| cg20836795 | ANTXR1;A | 2  | 0.01238447 | 0.22716713 | 0.186255296 | 0.348802464 |
| cg03164800 | ANTXR2   | 4  | 0.00403972 | 0.42160051 | 0.503162576 | 0.621412907 |
| cg14818154 | ANTXR2   | 4  | 0.02496653 | 0.29182747 | 0.328205541 | 0.443857217 |
| cg16326777 | ANTXR2   | 4  | 0.02326197 | 0.49544596 | 0.581225433 | 0.704829727 |
| cg11900509 | ANXA11;A | 10 | 0.00357923 | 0.17234089 | 0.172539447 | 0.309605664 |
| cg03730709 | ANXA11;A | 10 | 0.00205947 | 0.20397622 | 0.209791409 | 0.363691822 |
| cg15892650 | ANXA6;A  | 5  | 0.00092643 | 0.28124575 | 0.340923551 | 0.44812577  |
| cg20437604 | ANXA9;A  | 1  | 0.00450697 | 0.30851807 | 0.317842803 | 0.468412792 |
| cg14707353 | AOX1     | 2  | 0.00768774 | 0.60671928 | 0.628730565 | 0.765492456 |
| cg03832197 | AOX2P    | 2  | 0.0154863  | 0.3785106  | 0.303871633 | 0.482432403 |
| cg21185674 | AP2A2    | 11 | 0.01236318 | 0.39723264 | 0.392350101 | 0.530651659 |
| cg27205902 | AP2A2    | 11 | 0.00073118 | 0.2524728  | 0.338129611 | 0.648988778 |
| cg14389139 | AP2A2    | 11 | 0.00293735 | 0.46545141 | 0.542748115 | 0.656463148 |
| cg02570643 | AP3B1    | 5  | 0.0031673  | 0.56725267 | 0.538482395 | 0.676397735 |
| cg17656426 | AP3D1;A  | 19 | 0.0044883  | 0.56235792 | 0.532949994 | 0.694105154 |
| cg13917002 | APBA1    | 9  | 0.00627871 | 0.17940317 | 0.19428843  | 0.321414947 |
| cg27216937 | APBB1;A  | 11 | 0.01396719 | 0.52037509 | 0.518164404 | 0.633411735 |
| cg23774717 | APBB1IP  | 10 | 0.01574127 | 0.21724528 | 0.201904371 | 0.319960619 |
| cg23877017 | APBB2;A  | 4  | 0.00539186 | 0.20559539 | 0.234656065 | 0.4091651   |
| cg26865481 | APBB2;A  | 4  | 0.00569156 | 0.66447101 | 0.691986786 | 0.79961044  |
| cg25611723 | APCDD1   | 18 | 0.0130683  | 0.28653776 | 0.28800269  | 0.395397779 |
| cg04229487 | APCDD1   | 18 | 0.04615769 | 0.57231424 | 0.571108118 | 0.677588549 |
| cg17548735 | APOBEC2  | 6  | 0.00133251 | 0.26928762 | 0.276852222 | 0.491249016 |
| cg24424889 | APOBEC3  | 22 | 0.00146267 | 0.35210367 | 0.424193444 | 0.557600024 |
| cg05502439 | AQP6     | 12 | 0.00590146 | 0.22404266 | 0.212250295 | 0.340921986 |
| cg27321325 | ARAP1;A  | 11 | 0.02110372 | 0.33012523 | 0.316653233 | 0.440398095 |
| cg00487506 | ARC      | 8  | 0.00629716 | 0.43180986 | 0.44163637  | 0.565411083 |
| cg16178743 | ARG1;ME  | 6  | 0.01934763 | 0.40144182 | 0.443021948 | 0.582289789 |
| cg14780276 | ARHGAP1  | 4  | 0.01629158 | 0.31803683 | 0.308340935 | 0.449391153 |
| cg01165159 | ARHGAP1  | 4  | 0.00222822 | 0.23488168 | 0.248974103 | 0.401515396 |
| cg01381498 | ARHGAP1  | 4  | 0.00537181 | 0.25028371 | 0.318069303 | 0.431436572 |
| cg26282731 | ARHGAP1  | 4  | 0.00073118 | 0.11274845 | 0.168179148 | 0.337985491 |
| cg17600630 | ARHGAP1  | 2  | 0.00329066 | 0.20172652 | 0.24454285  | 0.354449059 |
| cg14575356 | ARHGAP1  | 6  | 0.00065949 | 0.11485598 | 0.210275097 | 0.324349936 |
| cg03930313 | ARHGAP2  | 17 | 0.01700751 | 0.2081501  | 0.180006245 | 0.314685792 |
| cg20028019 | ARHGAP2  | 17 | 0.0023961  | 0.48242998 | 0.435805574 | 0.588491903 |
| cg23659289 | ARHGAP2  | 17 | 0.00258198 | 0.11346491 | 0.10366473  | 0.231817066 |
| cg27244773 | ARHGAP2  | 17 | 0.0070644  | 0.33614275 | 0.276756353 | 0.46006096  |

|            |          |    |            |            |             |             |
|------------|----------|----|------------|------------|-------------|-------------|
| cg10094238 | ARHGAP2  | 17 | 0.00211366 | 0.30391855 | 0.270238759 | 0.41385653  |
| cg10236857 | ARHGDIA  | 17 | 0.00132756 | 0.31532103 | 0.331556412 | 0.446512174 |
| cg26074051 | ARHGDIA  | 17 | 0.00391963 | 0.74408322 | 0.675045167 | 0.879244623 |
| cg11326429 | ARHGDIA  | 17 | 0.00758031 | 0.24197933 | 0.236791954 | 0.347121533 |
| cg05503433 | ARHGEF1  | 19 | 0.00097592 | 0.35032179 | 0.382699586 | 0.485841843 |
| cg11492536 | ARHGEF1  | 8  | 0.02214521 | 0.53659569 | 0.571928568 | 0.676896432 |
| cg22223001 | ARHGEF1  | 8  | 0.00213077 | 0.49821928 | 0.549024906 | 0.714265045 |
| cg15414698 | ARHGEF1  | 8  | 0.00802646 | 0.57189766 | 0.599459108 | 0.703517784 |
| cg03705571 | ARHGEF1  | 8  | 0.0011122  | 0.21818179 | 0.274290178 | 0.465992408 |
| cg08381013 | ARHGEF1  | 8  | 0.00312811 | 0.58455354 | 0.596693646 | 0.708990175 |
| cg20149022 | ARHGEF1  | 8  | 0.00081599 | 0.22487794 | 0.326063832 | 0.476594293 |
| cg19351604 | ARHGEF1  | 8  | 0.02680411 | 0.48929629 | 0.51675308  | 0.632184166 |
| cg01607321 | ARHGEF1  | 8  | 0.00753326 | 0.31578218 | 0.310996309 | 0.447430441 |
| cg07694735 | ARHGEF1  | 8  | 0.00165917 | 0.33449357 | 0.349110749 | 0.583414735 |
| cg06807837 | ARHGEF1  | 8  | 0.00085934 | 0.48107451 | 0.52044579  | 0.734257151 |
| cg01824603 | ARHGEF1  | 8  | 0.0011571  | 0.34365494 | 0.36763851  | 0.607699784 |
| cg09915232 | ARHGEF1  | 8  | 0.00113577 | 0.56307553 | 0.5673839   | 0.672582387 |
| cg23780635 | ARHGEF1  | 8  | 0.00491697 | 0.33125883 | 0.312139368 | 0.47639498  |
| cg21161403 | ARHGEF1  | 8  | 0.00084118 | 0.25365228 | 0.26941543  | 0.380833571 |
| cg20690085 | ARHGEF1  | 8  | 0.02549119 | 0.2418051  | 0.212204799 | 0.380790109 |
| cg20294080 | ARHGEF1  | 1  | 0.01384716 | 0.2598926  | 0.248425602 | 0.393079139 |
| cg24371534 | ARHGEF1  | 1  | 0.00534446 | 0.34095296 | 0.359092949 | 0.481802272 |
| cg20430773 | ARHGEF1  | 1  | 0.00745107 | 0.11961934 | 0.100005571 | 0.227700035 |
| cg03887218 | ARHGEF1  | 1  | 0.00456378 | 0.29612857 | 0.253110571 | 0.427369659 |
| cg05722035 | ARHGEF3  | 3  | 0.04457786 | 0.39799079 | 0.325292162 | 0.503472707 |
| cg05400732 | ARHGEF3  | 3  | 0.00317348 | 0.39972056 | 0.258158879 | 0.509655689 |
| cg04606397 | ARID1B;A | 6  | 0.02041679 | 0.45194351 | 0.478191029 | 0.582316113 |
| cg00877708 | ARID1B;A | 6  | 0.00486477 | 0.4977107  | 0.583407711 | 0.68933205  |
| cg02671826 | ARID1B;A | 6  | 0.00262867 | 0.65422082 | 0.687375658 | 0.801494918 |
| cg03561416 | ARID1B;A | 6  | 0.00106137 | 0.17771841 | 0.20455331  | 0.352086998 |
| cg14987175 | ARID1B;A | 6  | 0.00287532 | 0.30559492 | 0.28894233  | 0.43645133  |
| cg26758131 | ARID5B   | 10 | 0.02802634 | 0.47903663 | 0.479894944 | 0.581242673 |
| cg10845391 | ARL10    | 5  | 0.00179217 | 0.18018183 | 0.202147477 | 0.369380305 |
| cg02437766 | ARL15    | 5  | 0.02987215 | 0.2022441  | 0.217603836 | 0.329284275 |
| cg21467371 | ARL16    | 17 | 0.00165724 | 0.31513076 | 0.294583252 | 0.41557237  |
| cg19140602 | ARMC4    | 10 | 0.00705647 | 0.42943707 | 0.33336312  | 0.532416961 |
| cg13004609 | ARMC9    | 2  | 0.01630619 | 0.4735212  | 0.504443141 | 0.614189817 |
| cg10435282 | ARNTL;AF | 11 | 0.00137603 | 0.44552086 | 0.445407607 | 0.633714171 |
| cg19536902 | ARNTL;AF | 11 | 0.02368354 | 0.68282886 | 0.667830105 | 0.783460733 |
| cg11699265 | ARPC1B   | 7  | 0.00259677 | 0.19769045 | 0.18314652  | 0.313869775 |
| cg21852346 | ARPP-21; | 3  | 0.00197986 | 0.5042788  | 0.500214173 | 0.684675254 |
| cg17456851 | ARSB     | 5  | 0.00180881 | 0.48888191 | 0.443463248 | 0.72086476  |
| cg15922611 | ARSJ     | 4  | 0.00889507 | 0.20781649 | 0.208070757 | 0.364694258 |
| cg13258774 | ASAP2;AS | 2  | 0.00375919 | 0.12446059 | 0.109311021 | 0.242331369 |
| cg05027258 | ASAP2;AS | 2  | 0.03358212 | 0.71872037 | 0.725841638 | 0.855796401 |
| cg24580199 | ASAP3;AS | 1  | 0.0284419  | 0.28902436 | 0.247271153 | 0.408181141 |

|            |          |    |            |            |             |             |
|------------|----------|----|------------|------------|-------------|-------------|
| cg24654025 | ASB13;AS | 10 | 0.02549971 | 0.42336964 | 0.407279224 | 0.541126245 |
| cg08240466 | ASIP     | 20 | 0.00429163 | 0.34040819 | 0.424153393 | 0.560179984 |
| cg10584100 | ASPH;ASF | 8  | 0.02995719 | 0.68655209 | 0.69896984  | 0.80952479  |
| cg22949575 | ASPSCR1  | 17 | 0.0013706  | 0.49043883 | 0.533060227 | 0.719664601 |
| cg04784499 | ASPSCR1  | 17 | 0.00220808 | 0.43388534 | 0.436240156 | 0.566552083 |
| cg11780549 | ASPSCR1  | 17 | 0.00310177 | 0.29577915 | 0.312375067 | 0.45078566  |
| cg02647835 | ASPSCR1  | 17 | 0.00220808 | 0.33121729 | 0.343578452 | 0.497013677 |
| cg08311321 | ASPSCR1  | 17 | 0.00431293 | 0.25586778 | 0.250704109 | 0.445107395 |
| cg14419393 | ASPSCR1  | 17 | 0.00449495 | 0.33589012 | 0.347271529 | 0.563100767 |
| cg09925620 | ASPSCR1  | 17 | 0.00072011 | 0.61654354 | 0.677242313 | 0.796659019 |
| cg01410415 | ASPSCR1  | 17 | 0.00320723 | 0.26063364 | 0.258685496 | 0.418321439 |
| cg26955287 | ASPSCR1  | 17 | 0.00181052 | 0.34253324 | 0.359649237 | 0.627359286 |
| cg15438211 | ASPSCR1  | 17 | 0.00089116 | 0.19898025 | 0.206106511 | 0.353365429 |
| cg06483978 | ASPSCR1  | 17 | 0.00081925 | 0.27726427 | 0.276460453 | 0.424089348 |
| cg23928512 | ASPSCR1  | 17 | 0.00314361 | 0.42976096 | 0.490238518 | 0.605567086 |
| cg12374579 | ASPSCR1  | 17 | 0.00174903 | 0.31415258 | 0.336708695 | 0.562811905 |
| cg14010829 | ASS1;ASS | 9  | 0.00283173 | 0.26385537 | 0.291684128 | 0.475945274 |
| cg14053997 | ASS1;ASS | 9  | 0.00126466 | 0.10600713 | 0.117836937 | 0.218292474 |
| cg13792444 | ASTN2;AS | 9  | 0.00167382 | 0.23629071 | 0.244748551 | 0.456947626 |
| cg20363931 | ATE1;ATE | 10 | 0.00420965 | 0.19126904 | 0.190916113 | 0.347366674 |
| cg10064029 | ATF6     | 1  | 0.01622063 | 0.21328242 | 0.253919044 | 0.401948284 |
| cg13074795 | ATF7;ATF | 12 | 0.02505273 | 0.19106502 | 0.207305302 | 0.33832156  |
| cg07238630 | ATG10;A1 | 5  | 0.00142458 | 0.51859431 | 0.51354734  | 0.708942513 |
| cg22214498 | ATG2A    | 11 | 0.00318676 | 0.56729744 | 0.536214411 | 0.6844242   |
| cg16721106 | ATG4B;A1 | 2  | 0.00255774 | 0.66034655 | 0.661429166 | 0.797980637 |
| cg00977707 | ATG7;ATC | 3  | 0.00899313 | 0.44640743 | 0.507612446 | 0.623118991 |
| cg24434988 | ATHL1    | 11 | 0.00840111 | 0.44832969 | 0.446584207 | 0.616253786 |
| cg12139707 | ATM;ATM  | 11 | 0.00107365 | 0.61657538 | 0.692166866 | 0.800197667 |
| cg05471373 | ATM;ATM  | 11 | 0.00080814 | 0.56099667 | 0.662900403 | 0.789150609 |
| cg20839205 | ATOH8    | 2  | 0.00096621 | 0.14101108 | 0.183951736 | 0.362211268 |
| cg18256640 | ATP10A   | 15 | 0.00520958 | 0.2053301  | 0.198189136 | 0.37595412  |
| cg06206670 | ATP11A;A | 13 | 0.00335524 | 0.46561056 | 0.484475872 | 0.669918127 |
| cg14737571 | ATP11A;A | 13 | 0.00539451 | 0.46215513 | 0.494313824 | 0.621740924 |
| cg10883123 | ATP11A;A | 13 | 0.00357848 | 0.36626881 | 0.383549974 | 0.554017844 |
| cg14649073 | ATP11A;A | 13 | 0.03270435 | 0.37639319 | 0.35474604  | 0.487068919 |
| cg14381255 | ATP11A;A | 13 | 0.00349176 | 0.27277839 | 0.299040839 | 0.496925412 |
| cg02873074 | ATP11A;A | 13 | 0.00191447 | 0.30187577 | 0.348064025 | 0.478923524 |
| cg19970086 | ATP11A;A | 13 | 0.00334886 | 0.50309803 | 0.546826453 | 0.678592843 |
| cg13858127 | ATP11A;A | 13 | 0.00777499 | 0.51748639 | 0.555344567 | 0.684393153 |
| cg11840467 | ATP11A;A | 13 | 0.00213077 | 0.30601802 | 0.326796197 | 0.462663562 |
| cg11462099 | ATP11A;A | 13 | 0.00521564 | 0.11529656 | 0.114246978 | 0.223807865 |
| cg17434062 | ATP13A2; | 1  | 0.01533394 | 0.30288527 | 0.281070925 | 0.426983941 |
| cg04403423 | ATP1A1;A | 1  | 0.01466514 | 0.44875622 | 0.491049782 | 0.610690359 |
| cg01448881 | ATP1A2   | 1  | 0.00624726 | 0.3600669  | 0.357832888 | 0.492011241 |
| cg26009832 | ATP1B1;A | 1  | 0.02388672 | 0.28155206 | 0.265834426 | 0.439054738 |
| cg10095954 | ATP2A3;A | 17 | 0.01293322 | 0.29200043 | 0.263925854 | 0.418077733 |

|            |           |    |            |            |             |             |
|------------|-----------|----|------------|------------|-------------|-------------|
| cg03956243 | ATP5G2;/  | 12 | 0.00376781 | 0.16491072 | 0.158670052 | 0.298820575 |
| cg05883442 | ATP6V0D   | 16 | 0.00077468 | 0.21643318 | 0.254822479 | 0.377170948 |
| cg02286270 | ATP8A2    | 13 | 0.0015244  | 0.50300126 | 0.543998524 | 0.702365513 |
| cg17488500 | ATP8B2;/  | 1  | 0.01585745 | 0.20743973 | 0.162182297 | 0.307846564 |
| cg22288309 | ATP8B4    | 15 | 0.02681286 | 0.4392286  | 0.444217628 | 0.636937744 |
| cg07111441 | ATPAF1;/  | 1  | 0.02649037 | 0.31390655 | 0.328243604 | 0.471306176 |
| cg19566879 | ATXN1;/   | 6  | 0.00432931 | 0.41141508 | 0.380559927 | 0.562300786 |
| cg26843612 | ATXN1;/   | 6  | 0.01007472 | 0.35481977 | 0.394263286 | 0.564397489 |
| cg16280399 | ATXN1;/   | 6  | 0.00868726 | 0.27931643 | 0.354338613 | 0.518087251 |
| cg08045301 | ATXN1L;/  | 16 | 0.00921039 | 0.4144134  | 0.440211609 | 0.541353583 |
| cg19053223 | ATXN7L1   | 7  | 0.00248015 | 0.30138931 | 0.337798196 | 0.439910076 |
| cg03619256 | ATXN7L1;/ | 7  | 0.00961538 | 0.22074647 | 0.21627135  | 0.326947454 |
| cg09965388 | ATXN7L3;/ | 17 | 0.01073324 | 0.35509749 | 0.33551643  | 0.550240144 |
| cg04601228 | AUTS2;/   | 7  | 0.00207648 | 0.32533613 | 0.275186396 | 0.55238131  |
| cg19793499 | AUTS2;/   | 7  | 0.00476313 | 0.25086702 | 0.237593488 | 0.383764351 |
| cg08474953 | AUTS2;/   | 7  | 0.00073265 | 0.62409182 | 0.660873528 | 0.801967669 |
| cg14818546 | AUTS2;/   | 7  | 0.01006689 | 0.23326723 | 0.255997979 | 0.377221601 |
| cg00012698 | AVEN      | 15 | 0.02087024 | 0.37136123 | 0.391944096 | 0.511142647 |
| cg24403487 | AZI1;/    | 17 | 0.00143053 | 0.50767028 | 0.512717435 | 0.621151115 |
| cg15564207 | AZI2;/    | 3  | 0.0135118  | 0.60757855 | 0.580689893 | 0.729376994 |
| cg12624040 | B3GALT1;/ | 2  | 0.04659965 | 0.73781612 | 0.674637179 | 0.867470719 |
| cg02413326 | B3GALT5;/ | 21 | 0.00934957 | 0.62251658 | 0.644933843 | 0.750019195 |
| cg05532325 | B3GNT7    | 2  | 0.01096356 | 0.54981608 | 0.506677473 | 0.7126752   |
| cg03037437 | B3GNT7    | 2  | 0.00093925 | 0.30322175 | 0.351991476 | 0.485182131 |
| cg11472422 | B3GNTL1   | 17 | 0.0019386  | 0.20365323 | 0.216542094 | 0.454753766 |
| cg21688152 | B3GNTL1   | 17 | 0.00820352 | 0.20597482 | 0.193265061 | 0.34305524  |
| cg03591954 | B3GNTL1   | 17 | 0.00223317 | 0.19513267 | 0.211004537 | 0.327883581 |
| cg07200616 | B3GNTL1   | 17 | 0.00574659 | 0.16183679 | 0.131822908 | 0.266499624 |
| cg24962672 | B3GNTL1   | 17 | 0.00238047 | 0.33200961 | 0.372476411 | 0.563816335 |
| cg19877683 | B3GNTL1   | 17 | 0.01653406 | 0.35842987 | 0.424813014 | 0.540842551 |
| cg13858803 | B4GALT1   | 9  | 0.00953692 | 0.21942917 | 0.1909923   | 0.404693986 |
| cg16883145 | B9D2;/    | 19 | 0.00126059 | 0.57527004 | 0.606886321 | 0.724810144 |
| cg11523350 | BACE1;/   | 11 | 0.02658897 | 0.32078974 | 0.281416949 | 0.427454885 |
| cg01923020 | BACE1;/   | 11 | 0.00405051 | 0.41800959 | 0.414199157 | 0.543246615 |
| cg09790829 | BACH2;/   | 6  | 0.00414201 | 0.26019304 | 0.278277028 | 0.401551487 |
| cg15380603 | BACH2;/   | 6  | 0.01859349 | 0.39227929 | 0.428732282 | 0.551352419 |
| cg07016556 | BAHCC1    | 17 | 0.01009622 | 0.18888029 | 0.160963844 | 0.29795423  |
| cg17624073 | BAHCC1    | 17 | 0.00168532 | 0.18939303 | 0.159253142 | 0.303796598 |
| cg25348105 | BAHCC1    | 17 | 0.01572147 | 0.27857509 | 0.272890286 | 0.383134434 |
| cg23532322 | BAIAP2;/  | 17 | 0.0023207  | 0.31546829 | 0.354363355 | 0.498026634 |
| cg11620135 | BAIAP2;/  | 17 | 0.00244246 | 0.16867903 | 0.155264834 | 0.32609673  |
| cg12475142 | BAIAP2;/  | 17 | 0.00513872 | 0.23709104 | 0.261167736 | 0.396105859 |
| cg22184944 | BAIAP2;/  | 17 | 0.03409516 | 0.30229043 | 0.30335213  | 0.404868105 |
| cg03060228 | BAIAP2;/  | 17 | 0.00183351 | 0.73841373 | 0.726480768 | 0.84155264  |
| cg12349181 | BAIAP2;/  | 17 | 0.00313278 | 0.47762466 | 0.465986357 | 0.613530632 |
| cg09840386 | BAIAP2;/  | 17 | 0.00126816 | 0.20865437 | 0.228703346 | 0.440476866 |



|            |           |    |            |            |             |             |
|------------|-----------|----|------------|------------|-------------|-------------|
| cg06374794 | BANP;BAI  | 16 | 0.04261712 | 0.40297242 | 0.359090468 | 0.524934607 |
| cg26979299 | BANP;BAI  | 16 | 0.0019469  | 0.39454924 | 0.484518999 | 0.603332603 |
| cg09870004 | BANP;BAI  | 16 | 0.00126059 | 0.20451936 | 0.221541224 | 0.38193049  |
| cg27058702 | BANP;BAI  | 16 | 0.00431293 | 0.29097519 | 0.281723283 | 0.470144779 |
| cg04081145 | BANP;BAI  | 16 | 0.00184468 | 0.583442   | 0.593451495 | 0.705937835 |
| cg01256999 | BANP;BAI  | 16 | 0.00103895 | 0.62321521 | 0.663512571 | 0.791169431 |
| cg05762553 | BANP;BAI  | 16 | 0.00431388 | 0.32062071 | 0.300031638 | 0.503587778 |
| cg06969933 | BANP;BAI  | 16 | 0.00400629 | 0.16997071 | 0.159503805 | 0.270060693 |
| cg15647614 | BAT1;BAT  | 6  | 0.0039229  | 0.55032302 | 0.587600833 | 0.706457919 |
| cg10660666 | BAT2L1    | 9  | 0.01021297 | 0.50806064 | 0.549899067 | 0.684186579 |
| cg09144098 | BBS2      | 16 | 0.02987844 | 0.26215135 | 0.281215461 | 0.427019651 |
| cg05891572 | BBS9;BBS  | 7  | 0.03453375 | 0.32528376 | 0.339842004 | 0.538018469 |
| cg13619623 | BBS9;BBS  | 7  | 0.04180327 | 0.40273507 | 0.425518477 | 0.545890804 |
| cg20299670 | BCAN      | 1  | 0.00482325 | 0.6217093  | 0.437903494 | 0.722227259 |
| cg08284564 | BCAR1;BC  | 16 | 0.01059488 | 0.47648508 | 0.513048024 | 0.62551519  |
| cg06888900 | BCAR1;BC  | 16 | 0.00253378 | 0.28460252 | 0.267922718 | 0.433907214 |
| cg02853019 | BCAR1;BC  | 16 | 0.01206679 | 0.22736829 | 0.197816339 | 0.333337596 |
| cg17192381 | BCL2      | 18 | 0.00290119 | 0.46224841 | 0.518521561 | 0.629580572 |
| cg26157948 | BCL3      | 19 | 0.02630407 | 0.44851581 | 0.423989512 | 0.584688106 |
| cg26811705 | BCL9L;BC  | 11 | 0.00137133 | 0.15346837 | 0.150853079 | 0.281998497 |
| cg20088756 | BEGAIN;E  | 14 | 0.00342408 | 0.44200316 | 0.463305703 | 0.653581519 |
| cg12025832 | BEGAIN;E  | 14 | 0.00177922 | 0.19587407 | 0.19723925  | 0.33099146  |
| cg19883293 | BEGAIN;E  | 14 | 0.00255831 | 0.13819812 | 0.143143412 | 0.25071173  |
| cg01963573 | BEND3     | 6  | 0.00144772 | 0.35672357 | 0.384200884 | 0.551810113 |
| cg08811259 | BEND6     | 6  | 0.02205285 | 0.18774743 | 0.196753297 | 0.321203092 |
| cg11562596 | BEST1;BE  | 11 | 0.00497255 | 0.32580952 | 0.346703733 | 0.483526368 |
| cg17277939 | BEST3;BE  | 12 | 0.01446513 | 0.48074913 | 0.457876315 | 0.627206755 |
| cg13533456 | BET3L     | 6  | 0.00338706 | 0.31450461 | 0.445427315 | 0.585694596 |
| cg18815565 | BFSP1     | 20 | 0.02870038 | 0.33604247 | 0.295920121 | 0.45746022  |
| cg26344982 | BHLHE40   | 3  | 0.00339981 | 0.27395423 | 0.250281068 | 0.41353329  |
| cg18768347 | BHLHE40   | 3  | 0.0059385  | 0.24869517 | 0.216553561 | 0.383470128 |
| cg25629905 | BHLHE41   | 12 | 0.00716301 | 0.2940989  | 0.243655122 | 0.448694119 |
| cg24791156 | BIN3      | 8  | 0.00341796 | 0.38254582 | 0.343179518 | 0.509831404 |
| cg15270350 | BIRC5;BIF | 17 | 0.0019906  | 0.16995448 | 0.176003513 | 0.343697197 |
| cg11971852 | BIRC6     | 2  | 0.02833301 | 0.16767518 | 0.156700072 | 0.279046126 |
| cg14579118 | BLVRA     | 7  | 0.00085355 | 0.19633133 | 0.24489028  | 0.419564959 |
| cg26665274 | BMP2      | 20 | 0.0010778  | 0.31766555 | 0.276852283 | 0.563504426 |
| cg05923197 | BMP4;BN   | 14 | 0.00380612 | 0.41380867 | 0.41913471  | 0.53521378  |
| cg15476602 | BMPR1A    | 10 | 0.00186737 | 0.32348786 | 0.311834874 | 0.478920121 |
| cg23210521 | BMPR1B    | 4  | 0.00074016 | 0.34210406 | 0.53558042  | 0.641443337 |
| cg06147895 | BNIP3     | 10 | 0.00124152 | 0.18893177 | 0.210763384 | 0.372371805 |
| cg02365648 | BNIP3     | 10 | 0.00075702 | 0.15957234 | 0.229999097 | 0.427260915 |
| cg22987267 | BNIP3L    | 8  | 0.00568196 | 0.32108084 | 0.367398425 | 0.531488768 |
| cg25132931 | BOC       | 3  | 0.0017637  | 0.37398848 | 0.43896533  | 0.607420306 |
| cg02858625 | BOC       | 3  | 0.00733126 | 0.29470723 | 0.319277047 | 0.559005972 |
| cg13071869 | BOC       | 3  | 0.00291147 | 0.36889758 | 0.466991683 | 0.647050234 |

|            |           |    |            |            |             |             |
|------------|-----------|----|------------|------------|-------------|-------------|
| cg15111495 | BOC       | 3  | 0.00100376 | 0.24979574 | 0.289249009 | 0.47097434  |
| cg05122957 | BOC       | 3  | 0.00579203 | 0.17408963 | 0.155211668 | 0.29326428  |
| cg13272743 | BOC       | 3  | 0.00177922 | 0.50510802 | 0.5642257   | 0.698497617 |
| cg11882488 | BOC       | 3  | 0.00729536 | 0.60541878 | 0.661419494 | 0.788371137 |
| cg01908177 | BOC       | 3  | 0.00303542 | 0.49156995 | 0.494919548 | 0.625545363 |
| cg25958911 | BOP1      | 8  | 0.03875896 | 0.64663725 | 0.597026309 | 0.749698074 |
| cg06354558 | BOP1      | 8  | 0.00734129 | 0.79286733 | 0.781736489 | 0.896216846 |
| cg01294253 | BRD3      | 9  | 0.00104452 | 0.20173615 | 0.228334829 | 0.37272679  |
| cg03657791 | BRD4      | 19 | 0.00280262 | 0.59476781 | 0.627748653 | 0.756179057 |
| cg10827768 | BRE;BRE;I | 2  | 0.04901873 | 0.4402088  | 0.449176126 | 0.558039523 |
| cg15161050 | BRI3BP    | 12 | 0.01183088 | 0.53118277 | 0.568641879 | 0.682827417 |
| cg24351452 | BRSK1     | 19 | 0.00377206 | 0.50449955 | 0.483936056 | 0.6697867   |
| cg10002860 | BRSK2     | 11 | 0.01317683 | 0.35306534 | 0.346677525 | 0.483019408 |
| cg19977004 | BRSK2     | 11 | 0.00256738 | 0.46128443 | 0.447989388 | 0.59024764  |
| cg24206507 | BRSK2     | 11 | 0.00463097 | 0.50205282 | 0.489416715 | 0.681992277 |
| cg21757872 | BTBD11;E  | 12 | 0.01086076 | 0.1768174  | 0.154792694 | 0.297824242 |
| cg11841741 | BTBD11;E  | 12 | 0.00319532 | 0.14239908 | 0.206819246 | 0.322119829 |
| cg27384342 | BTBD12    | 16 | 0.02438027 | 0.18885371 | 0.202392504 | 0.318490528 |
| cg06094113 | BTBD18    | 11 | 0.00352383 | 0.29762298 | 0.264073173 | 0.443523721 |
| cg06766016 | BTBD19    | 1  | 0.03923812 | 0.46148283 | 0.469087696 | 0.588605055 |
| cg25688060 | BTBD3     | 20 | 0.00747148 | 0.47002113 | 0.527888179 | 0.640825944 |
| cg13442386 | BTBD9;BT  | 6  | 0.00588734 | 0.50393083 | 0.508651456 | 0.674142807 |
| cg11914795 | C10orf10  | 10 | 0.01091243 | 0.25126921 | 0.188677724 | 0.351633616 |
| cg01140247 | C10orf11  | 10 | 0.01387172 | 0.29383321 | 0.312067119 | 0.437268191 |
| cg14207539 | C10orf11  | 10 | 0.00149857 | 0.44729269 | 0.547169625 | 0.698111699 |
| cg23264016 | C10orf11  | 10 | 0.00094083 | 0.29542507 | 0.345011014 | 0.490923579 |
| cg23966017 | C10orf11  | 10 | 0.03212706 | 0.26595883 | 0.284897297 | 0.4349449   |
| cg09411597 | C10orf18  | 10 | 0.01206219 | 0.29456137 | 0.331659133 | 0.47713978  |
| cg17502312 | C10orf18  | 10 | 0.00539114 | 0.23451213 | 0.213362792 | 0.400916814 |
| cg01291665 | C10orf47  | 10 | 0.02182683 | 0.38939914 | 0.39673868  | 0.535028011 |
| cg08571020 | C10orf62  | 10 | 0.00117736 | 0.65890276 | 0.669943516 | 0.809167634 |
| cg10775039 | C10orf71  | 10 | 0.00480767 | 0.25335897 | 0.300751018 | 0.468309309 |
| cg18895336 | C10orf72  | 10 | 0.00065949 | 0.33596759 | 0.411101641 | 0.564566682 |
| cg07260003 | C10orf72  | 10 | 0.00065949 | 0.12494458 | 0.16518496  | 0.274867178 |
| cg18286127 | C10orf84  | 10 | 0.00114256 | 0.21840522 | 0.255899157 | 0.485081426 |
| cg01743835 | C11orf34  | 11 | 0.02846049 | 0.55089476 | 0.59750187  | 0.745883595 |
| cg06579738 | C11orf92  | 11 | 0.0196961  | 0.48388905 | 0.458540509 | 0.612737404 |
| cg27475923 | C11orf95  | 11 | 0.00232154 | 0.32108408 | 0.275342752 | 0.442502074 |
| cg04686545 | C12orf23  | 12 | 0.03009647 | 0.30258894 | 0.267619256 | 0.431582106 |
| cg10082647 | C12orf23  | 12 | 0.00798815 | 0.27154819 | 0.267863017 | 0.376053786 |
| cg00019678 | C12orf34  | 12 | 0.00316372 | 0.15249521 | 0.137910049 | 0.298910036 |
| cg19879537 | C12orf34  | 12 | 0.00419259 | 0.52570478 | 0.597828609 | 0.708447535 |
| cg03061518 | C12orf65  | 12 | 0.00436875 | 0.22064791 | 0.177121622 | 0.330182461 |
| cg11727592 | C13orf18  | 13 | 0.00359037 | 0.41505107 | 0.426803172 | 0.534151729 |
| cg10664305 | C13orf30  | 13 | 0.021196   | 0.54382314 | 0.575428319 | 0.678843885 |
| cg17923947 | C14orf13  | 14 | 0.04745403 | 0.50433864 | 0.482212823 | 0.604662162 |

|            |           |    |            |            |             |             |
|------------|-----------|----|------------|------------|-------------|-------------|
| cg10297617 | C14orf15  | 14 | 0.01026031 | 0.11221884 | 0.100782637 | 0.216082635 |
| cg00780666 | C14orf17  | 14 | 0.02878476 | 0.41728157 | 0.423115097 | 0.578186608 |
| cg08258506 | C14orf43  | 14 | 0.01154548 | 0.22606213 | 0.235784728 | 0.392371239 |
| cg24128590 | C14orf43  | 14 | 0.00353178 | 0.27760037 | 0.25981595  | 0.471657647 |
| cg23938483 | C14orf43  | 14 | 0.00202314 | 0.46776393 | 0.478342782 | 0.672380534 |
| cg21032266 | C14orf43  | 14 | 0.00327239 | 0.38432867 | 0.437587142 | 0.607490217 |
| cg01024668 | C15orf28  | 15 | 0.0062271  | 0.56894803 | 0.591484968 | 0.704301819 |
| cg03536657 | C15orf28  | 15 | 0.00073118 | 0.40512059 | 0.494745643 | 0.622336476 |
| cg27211935 | C15orf39  | 15 | 0.00664361 | 0.59764565 | 0.580830036 | 0.743919956 |
| cg20602300 | C15orf57  | 15 | 0.00068904 | 0.34532637 | 0.482397392 | 0.686891839 |
| cg17140476 | C15orf57  | 15 | 0.00242276 | 0.30901974 | 0.373191765 | 0.557398295 |
| cg03015880 | C16orf13  | 16 | 0.0135118  | 0.47387783 | 0.500296101 | 0.624411007 |
| cg02642565 | C16orf5   | 16 | 0.00661882 | 0.12165337 | 0.110152459 | 0.228706801 |
| cg05396425 | C16orf5   | 16 | 0.04797329 | 0.41849951 | 0.455645839 | 0.56841487  |
| cg08496964 | C16orf68  | 16 | 0.00464252 | 0.4964174  | 0.514552405 | 0.638547849 |
| cg26923629 | C16orf71  | 16 | 0.00810401 | 0.22784134 | 0.191044024 | 0.379793856 |
| cg04558424 | C16orf74  | 16 | 0.00263371 | 0.34005064 | 0.320339775 | 0.488791952 |
| cg26967566 | C16orf74  | 16 | 0.00133856 | 0.33568864 | 0.362146239 | 0.53224501  |
| cg25657222 | C17orf10  | 17 | 0.00692459 | 0.57409402 | 0.611323061 | 0.741205603 |
| cg11494841 | C17orf62  | 17 | 0.00329066 | 0.2944389  | 0.247080663 | 0.400845762 |
| cg09913183 | C17orf65  | 17 | 0.02077264 | 0.69436488 | 0.655479847 | 0.81248549  |
| cg25309567 | C17orf70  | 17 | 0.00087274 | 0.31681071 | 0.356093901 | 0.529063779 |
| cg02698731 | C17orf70  | 17 | 0.00141131 | 0.43665875 | 0.449278455 | 0.567089851 |
| cg26421997 | C17orf79  | 17 | 0.00312077 | 0.56018668 | 0.540972317 | 0.663209959 |
| cg21737421 | C18orf1;( | 18 | 0.00442574 | 0.57700982 | 0.488035559 | 0.691478241 |
| cg23508887 | C18orf1;( | 18 | 0.00232775 | 0.09083004 | 0.080601558 | 0.210708107 |
| cg24780966 | C18orf1;( | 18 | 0.00195644 | 0.32407006 | 0.359777844 | 0.59294717  |
| cg27107110 | C18orf1;( | 18 | 0.00359124 | 0.45127452 | 0.456078708 | 0.570200815 |
| cg23357435 | C19orf26  | 19 | 0.00097337 | 0.55320967 | 0.554145809 | 0.736897912 |
| cg07946961 | C19orf34  | 19 | 0.01189791 | 0.3548933  | 0.33734668  | 0.483436699 |
| cg27345346 | C19orf55  | 19 | 0.01572147 | 0.39034695 | 0.354739147 | 0.504158815 |
| cg17344770 | C19orf71  | 19 | 0.0006736  | 0.22754975 | 0.31530102  | 0.54036976  |
| cg07720789 | C1orf105  | 1  | 0.01268304 | 0.49883583 | 0.509332093 | 0.614152227 |
| cg17131183 | C1orf113  | 1  | 0.0080158  | 0.28360197 | 0.281063225 | 0.438205099 |
| cg15926004 | C1orf133  | 1  | 0.00745107 | 0.1590898  | 0.126801101 | 0.260396628 |
| cg23812948 | C1orf159  | 1  | 0.04937176 | 0.43889327 | 0.40595543  | 0.61359143  |
| cg01722868 | C1orf161  | 1  | 0.00742222 | 0.40306695 | 0.419353717 | 0.61955772  |
| cg14853231 | C1orf174  | 1  | 0.0102761  | 0.35265961 | 0.358177207 | 0.470192975 |
| cg27446570 | C1orf174  | 1  | 0.00715821 | 0.25839005 | 0.221886049 | 0.424737009 |
| cg15324917 | C1orf198  | 1  | 0.00215533 | 0.13611575 | 0.139055743 | 0.309208358 |
| cg21777154 | C1orf21   | 1  | 0.00100561 | 0.43630886 | 0.481370281 | 0.687192835 |
| cg11855643 | C1orf21   | 1  | 0.00074409 | 0.43589492 | 0.51099984  | 0.652832727 |
| cg07582892 | C1orf21   | 1  | 0.00287532 | 0.22472455 | 0.314376568 | 0.485101196 |
| cg15644413 | C1orf216  | 1  | 0.00066232 | 0.36334619 | 0.412450725 | 0.586557141 |
| cg21582311 | C1orf96   | 1  | 0.00381415 | 0.26094342 | 0.233768653 | 0.494260552 |
| cg04243822 | C1QTNF1   | 17 | 0.03249565 | 0.1524468  | 0.133737523 | 0.290079492 |

|            |           |    |            |            |             |             |
|------------|-----------|----|------------|------------|-------------|-------------|
| cg02282892 | C1QTNF3   | 5  | 0.04085317 | 0.17052556 | 0.174713882 | 0.312599967 |
| cg03934354 | C1QTNF3   | 5  | 0.00357923 | 0.15131913 | 0.143545901 | 0.29502997  |
| cg18356785 | C1QTNF4   | 11 | 0.01042463 | 0.25129637 | 0.198678866 | 0.352261676 |
| cg09250458 | C1QTNF8   | 16 | 0.01116167 | 0.14997565 | 0.138025418 | 0.261025758 |
| cg02726898 | C1QTNF8   | 16 | 0.02252189 | 0.24946966 | 0.243613438 | 0.367572203 |
| cg03904630 | C20orf11  | 20 | 0.01523475 | 0.62011228 | 0.635738484 | 0.75775647  |
| cg16125816 | C20orf11  | 20 | 0.00575178 | 0.61107723 | 0.653492353 | 0.782260664 |
| cg02182210 | C20orf16  | 20 | 0.00198606 | 0.24046378 | 0.212307732 | 0.372899145 |
| cg09203029 | C20orf20  | 20 | 0.00201167 | 0.16918912 | 0.147650667 | 0.427842403 |
| cg23736024 | C21orf12  | 21 | 0.00556434 | 0.59302785 | 0.554505938 | 0.714035738 |
| cg10273072 | C21orf34  | 21 | 0.02935375 | 0.27954522 | 0.333538344 | 0.44714156  |
| cg06684407 | C21orf67  | 21 | 0.00227742 | 0.27691821 | 0.284200082 | 0.472511533 |
| cg19902195 | C21orf67  | 21 | 0.00271346 | 0.38673754 | 0.394025637 | 0.602445292 |
| cg10007534 | C21orf70  | 21 | 0.00704342 | 0.32890167 | 0.370588446 | 0.520094249 |
| cg05054998 | C21orf70  | 21 | 0.0293309  | 0.26668922 | 0.258834647 | 0.391983935 |
| cg06787912 | C21orf82  | 21 | 0.00953692 | 0.28007974 | 0.269305144 | 0.478096519 |
| cg12003230 | C21orf84  | 21 | 0.00645854 | 0.34535701 | 0.319477461 | 0.533666305 |
| cg01169075 | C2orf34   | 2  | 0.00838112 | 0.55011783 | 0.554339558 | 0.660453427 |
| cg22948077 | C2orf40   | 2  | 0.00600204 | 0.41080714 | 0.47232772  | 0.603017112 |
| cg02061967 | C2orf48   | 2  | 0.00456818 | 0.54018872 | 0.56886574  | 0.671628573 |
| cg25819429 | C2orf48   | 2  | 0.0046471  | 0.30987168 | 0.325178274 | 0.450876732 |
| cg09994035 | C2orf54;( | 2  | 0.00293735 | 0.34423872 | 0.316602541 | 0.489635725 |
| cg12789935 | C2orf54;( | 2  | 0.00081925 | 0.20765937 | 0.204811632 | 0.381258334 |
| cg16171392 | C2orf54;( | 2  | 0.00067897 | 0.52740499 | 0.574225467 | 0.72722594  |
| cg08517455 | C2orf55   | 2  | 0.00552473 | 0.51628302 | 0.525939204 | 0.654169636 |
| cg10481134 | C2orf58   | 2  | 0.04601984 | 0.31094464 | 0.282654215 | 0.464831952 |
| cg04276057 | C2orf82   | 2  | 0.0019386  | 0.17838869 | 0.188485248 | 0.299965849 |
| cg13047596 | C2orf82;( | 2  | 0.00258141 | 0.4037787  | 0.419426364 | 0.532085446 |
| cg06436504 | C3orf26;( | 3  | 0.00637687 | 0.49481111 | 0.516104103 | 0.645944487 |
| cg00447769 | C3orf62   | 3  | 0.048539   | 0.66058801 | 0.670443161 | 0.78801851  |
| cg22690884 | C3orf74   | 3  | 0.00088355 | 0.45432523 | 0.499606875 | 0.648207133 |
| cg26044340 | C4BPA     | 1  | 0.02995719 | 0.51865569 | 0.441940392 | 0.626324945 |
| cg26430305 | C4BPA     | 1  | 0.02541872 | 0.18296157 | 0.194859109 | 0.312502166 |
| cg14740771 | C4BPB;(C4 | 1  | 0.008246   | 0.19774815 | 0.187159931 | 0.351579584 |
| cg06005199 | C4orf23   | 4  | 0.00076471 | 0.39640787 | 0.480248855 | 0.706908383 |
| cg11036672 | C4orf23   | 4  | 0.00083329 | 0.17590111 | 0.210201903 | 0.379862475 |
| cg09774649 | C4orf23   | 4  | 0.00159903 | 0.12614285 | 0.134863514 | 0.275944455 |
| cg15466157 | C4orf44;( | 4  | 0.000693   | 0.67908639 | 0.744417402 | 0.873302041 |
| cg23210109 | C4orf44;( | 4  | 0.00367311 | 0.3760931  | 0.338108186 | 0.53767038  |
| cg01242977 | C5orf13;( | 5  | 0.00294138 | 0.49700718 | 0.505918166 | 0.643497693 |
| cg08927631 | C5orf33;( | 5  | 0.00178771 | 0.26808115 | 0.360727783 | 0.494216911 |
| cg13011452 | C6orf136  | 6  | 0.00351539 | 0.31393886 | 0.312432053 | 0.424445606 |
| cg19117070 | C6orf145  | 6  | 0.00402744 | 0.54398932 | 0.54062056  | 0.68507535  |
| cg07241170 | C6orf145  | 6  | 0.0122594  | 0.27165002 | 0.222773015 | 0.384525896 |
| cg00786256 | C6orf147  | 6  | 0.01096356 | 0.73996493 | 0.708582419 | 0.844904526 |
| cg24756966 | C6orf154  | 6  | 0.0017228  | 0.53308302 | 0.551180666 | 0.669168784 |

|            |           |    |            |            |             |             |
|------------|-----------|----|------------|------------|-------------|-------------|
| cg11523799 | C6orf154  | 6  | 0.00180881 | 0.47466023 | 0.451914759 | 0.635118518 |
| cg25658884 | C6orf163  | 6  | 0.04685951 | 0.29207385 | 0.304561539 | 0.4065904   |
| cg17767198 | C6orf170  | 6  | 0.00118031 | 0.67917036 | 0.736350131 | 0.868039768 |
| cg16672203 | C6orf27   | 6  | 0.00079512 | 0.40104492 | 0.518784428 | 0.63782232  |
| cg21032074 | C6orf94   | 6  | 0.00186737 | 0.21118781 | 0.195664748 | 0.485243592 |
| cg21863721 | C6orf94;l | 6  | 0.00314038 | 0.65529985 | 0.680477515 | 0.800418481 |
| cg04099158 | C7orf10   | 7  | 0.03585699 | 0.19358991 | 0.162310848 | 0.340694558 |
| cg24921614 | C7orf20   | 7  | 0.00137524 | 0.42855846 | 0.422802729 | 0.539142247 |
| cg25795026 | C7orf20   | 7  | 0.00207648 | 0.26969806 | 0.212534144 | 0.37372099  |
| cg11177223 | C7orf20   | 7  | 0.00488333 | 0.3425397  | 0.310897183 | 0.507794634 |
| cg11360546 | C7orf50;C | 7  | 0.00065949 | 0.35075487 | 0.462992405 | 0.630675806 |
| cg02332902 | C7orf50;C | 7  | 0.00075144 | 0.79121245 | 0.82021996  | 0.9210842   |
| cg09526129 | C7orf50;C | 7  | 0.00090417 | 0.58705952 | 0.608900686 | 0.856285905 |
| cg01343703 | C7orf50;C | 7  | 0.00255186 | 0.53899045 | 0.565349042 | 0.715688115 |
| cg04498913 | C7orf50;C | 7  | 0.00100054 | 0.39621437 | 0.401751356 | 0.526037195 |
| cg21255128 | C7orf50;C | 7  | 0.00195613 | 0.45485123 | 0.390508002 | 0.601708505 |
| cg08081346 | C7orf50;C | 7  | 0.001445   | 0.43334014 | 0.43077755  | 0.606432553 |
| cg00364696 | C7orf50;C | 7  | 0.00870675 | 0.46541023 | 0.448096224 | 0.627333066 |
| cg08626653 | C7orf51   | 7  | 0.00103895 | 0.23916619 | 0.258354491 | 0.412694386 |
| cg05686445 | C7orf54;S | 7  | 0.01820811 | 0.1717131  | 0.175073155 | 0.319898684 |
| cg24777710 | C7orf54;S | 7  | 0.00164959 | 0.346334   | 0.453178453 | 0.622688568 |
| cg11869184 | C7orf61   | 7  | 0.00126235 | 0.61545462 | 0.632073826 | 0.75574769  |
| cg01814565 | C8orf34   | 8  | 0.03889249 | 0.32924667 | 0.341816051 | 0.483952355 |
| cg13402635 | C9orf3    | 9  | 0.00457044 | 0.1606299  | 0.128729926 | 0.30342932  |
| cg21189849 | C9orf3    | 9  | 0.00160732 | 0.35317532 | 0.396878303 | 0.512303556 |
| cg14503441 | C9orf3    | 9  | 0.00126816 | 0.58780574 | 0.578905364 | 0.725010419 |
| cg00542880 | C9orf3    | 9  | 0.00335524 | 0.4295827  | 0.430696252 | 0.611742653 |
| cg14375632 | C9orf3    | 9  | 0.02830078 | 0.52886428 | 0.527785444 | 0.63260571  |
| cg13853813 | C9orf3    | 9  | 0.0097835  | 0.20122929 | 0.202175432 | 0.358158356 |
| cg14601621 | C9orf3    | 9  | 0.00137723 | 0.30806657 | 0.310986588 | 0.45075324  |
| cg13972491 | C9orf3    | 9  | 0.00081711 | 0.25975829 | 0.274499042 | 0.422003832 |
| cg23598352 | C9orf46   | 9  | 0.01640621 | 0.30252004 | 0.342569507 | 0.442951704 |
| cg06788565 | C9orf69   | 9  | 0.00405622 | 0.24277292 | 0.221302477 | 0.383183876 |
| cg14224203 | C9orf86;C | 9  | 0.00126535 | 0.15763515 | 0.189086767 | 0.293851099 |
| cg06557985 | CA10;CA1  | 17 | 0.00804549 | 0.57791424 | 0.568707053 | 0.727473027 |
| cg02190618 | CA5A      | 16 | 0.03956605 | 0.44463887 | 0.471055767 | 0.583589736 |
| cg06948222 | CA5A      | 16 | 0.01512979 | 0.40490186 | 0.379875642 | 0.524808188 |
| cg25919221 | CA6       | 1  | 0.00349176 | 0.29157237 | 0.368278274 | 0.541714223 |
| cg04874511 | CAB39L;C  | 13 | 0.00387834 | 0.54378956 | 0.500834712 | 0.69784639  |
| cg27440150 | CABIN1    | 22 | 0.00124625 | 0.48531917 | 0.478858518 | 0.656111599 |
| cg18793086 | CABLES1;  | 18 | 0.02199601 | 0.24685436 | 0.181643828 | 0.36088971  |
| cg19075717 | CACNA1C   | 17 | 0.00193169 | 0.31220706 | 0.376475676 | 0.485795731 |
| cg14585054 | CACNB1;C  | 17 | 0.00643366 | 0.22110254 | 0.177616853 | 0.380377771 |
| cg15828524 | CACNB3    | 12 | 0.01269426 | 0.54729232 | 0.507332924 | 0.65800406  |
| cg16922523 | CADM1;C   | 11 | 0.00488665 | 0.26709057 | 0.370002376 | 0.499600975 |
| cg11425149 | CALD1;CA  | 7  | 0.00967401 | 0.19609011 | 0.18020382  | 0.381609477 |

|            |          |    |            |            |             |             |
|------------|----------|----|------------|------------|-------------|-------------|
| cg25418947 | CALD1;CA | 7  | 0.00449495 | 0.39999986 | 0.455961087 | 0.587701304 |
| cg09707038 | CALM2    | 2  | 0.0086408  | 0.46128252 | 0.496773655 | 0.613170214 |
| cg19513232 | CAMK2A;  | 5  | 0.0022221  | 0.28517745 | 0.29252432  | 0.431403838 |
| cg05379597 | CAMK2G;  | 10 | 0.00073378 | 0.12196488 | 0.150408421 | 0.260104096 |
| cg25834768 | CAMKK1;  | 17 | 0.01890283 | 0.27416661 | 0.269878597 | 0.417338255 |
| cg01643090 | CAMTA1   | 1  | 0.00375204 | 0.56818179 | 0.571381178 | 0.721602342 |
| cg01912298 | CAMTA2;  | 17 | 0.03524554 | 0.26916741 | 0.249317258 | 0.386896593 |
| cg27090078 | CAPG     | 2  | 0.00112793 | 0.43672196 | 0.464076059 | 0.63598403  |
| cg06970290 | CAPN1    | 11 | 0.00263491 | 0.46223366 | 0.48605351  | 0.657845767 |
| cg09620688 | CAPN1    | 11 | 0.01216006 | 0.33376025 | 0.296995512 | 0.435633972 |
| cg04962005 | CAPN1    | 11 | 0.00541575 | 0.28829744 | 0.263717846 | 0.448836536 |
| cg01712700 | CAPN10;( | 2  | 0.00204904 | 0.24510817 | 0.238544484 | 0.406022812 |
| cg10078335 | CAPN10;( | 2  | 0.00134844 | 0.3930997  | 0.408540374 | 0.527040654 |
| cg14086599 | CAPN10;( | 2  | 0.00178025 | 0.2021347  | 0.19161523  | 0.367407405 |
| cg16615776 | CAPN10;( | 2  | 0.00090002 | 0.27386015 | 0.299319003 | 0.572994062 |
| cg22428691 | CAPN2;C/ | 1  | 0.00070134 | 0.48836337 | 0.538182097 | 0.652605398 |
| cg04652208 | CAPN8    | 1  | 0.00296695 | 0.3813739  | 0.391682313 | 0.64775092  |
| cg19807694 | CAPN8    | 1  | 0.02438027 | 0.24963669 | 0.278497443 | 0.423983648 |
| cg15119640 | CAPN8    | 1  | 0.03270435 | 0.48031943 | 0.480853377 | 0.59378236  |
| cg27235315 | CAPN8    | 1  | 0.01289231 | 0.47103427 | 0.522446565 | 0.644209441 |
| cg13545089 | CAPS;CAF | 19 | 0.00119385 | 0.45005878 | 0.446461707 | 0.620288465 |
| cg07535740 | CAPS;CAF | 19 | 0.00401824 | 0.27438791 | 0.242891788 | 0.39299633  |
| cg12763668 | CAPZB    | 1  | 0.013012   | 0.19750957 | 0.166351005 | 0.32978508  |
| cg17786902 | CAPZB    | 1  | 0.01751915 | 0.26019615 | 0.230638275 | 0.369444047 |
| cg03534655 | CARD11   | 7  | 0.02289623 | 0.58440106 | 0.605715233 | 0.708345743 |
| cg14035368 | CARD9;C/ | 9  | 0.00806542 | 0.29531507 | 0.265668539 | 0.406268532 |
| cg21664614 | CARKD    | 13 | 0.00177922 | 0.46296319 | 0.460138877 | 0.594799691 |
| cg02922734 | CARKD    | 13 | 0.01183117 | 0.53050028 | 0.567486365 | 0.691162817 |
| cg25709335 | CARKD    | 13 | 0.00637687 | 0.47437052 | 0.518893545 | 0.643550871 |
| cg17155330 | CARKD    | 13 | 0.0154863  | 0.63354306 | 0.61303881  | 0.768837605 |
| cg02321885 | CARM1    | 19 | 0.00925638 | 0.35046984 | 0.336843073 | 0.491571384 |
| cg08862742 | CARS;CAF | 11 | 0.01164121 | 0.24116908 | 0.224238699 | 0.424379765 |
| cg14312661 | CARS;CAF | 11 | 0.00854392 | 0.14092511 | 0.129796834 | 0.283870263 |
| cg10993865 | CARS2    | 13 | 0.00674191 | 0.66579118 | 0.665219714 | 0.802841168 |
| cg15597662 | CASC3    | 17 | 0.02551242 | 0.40259779 | 0.360647692 | 0.519004609 |
| cg25525709 | CASKIN2; | 17 | 0.00152405 | 0.68377014 | 0.679866614 | 0.82144906  |
| cg05446253 | CASKIN2; | 17 | 0.00317348 | 0.2979832  | 0.284220984 | 0.487720067 |
| cg09457470 | CASKIN2; | 17 | 0.00401094 | 0.47290001 | 0.437662535 | 0.613832625 |
| cg09662798 | CASKIN2; | 17 | 0.00194569 | 0.25227287 | 0.255466435 | 0.42576153  |
| cg19405868 | CASP1;CA | 11 | 0.00126535 | 0.62391413 | 0.691028629 | 0.836921129 |
| cg01128042 | CASP7;CA | 10 | 0.02766761 | 0.25239554 | 0.250217077 | 0.484788843 |
| cg26194092 | CASP9;CA | 1  | 0.0097835  | 0.54592323 | 0.563991266 | 0.669523349 |
| cg15064681 | CASQ2    | 1  | 0.00320302 | 0.43416429 | 0.524927337 | 0.675186055 |
| cg17158913 | CASZ1;CA | 1  | 0.00395839 | 0.32685486 | 0.308949423 | 0.431278509 |
| cg03845745 | CBR4     | 4  | 0.02001663 | 0.42747071 | 0.432061753 | 0.57966549  |
| cg09257178 | CBWD2;L  | 2  | 0.00168849 | 0.4092642  | 0.407714624 | 0.577013572 |

|            |          |    |            |            |             |             |
|------------|----------|----|------------|------------|-------------|-------------|
| cg05738585 | CBX6     | 22 | 0.00337131 | 0.33647542 | 0.324378318 | 0.455217205 |
| cg12580580 | CCDC109  | 10 | 0.00905411 | 0.40905724 | 0.397126146 | 0.530395195 |
| cg18251984 | CCDC144  | 17 | 0.0181634  | 0.53842393 | 0.530628023 | 0.672984836 |
| cg21646082 | CCDC21   | 1  | 0.01666517 | 0.32411234 | 0.32723708  | 0.435389598 |
| cg11134246 | CCDC24   | 1  | 0.00194312 | 0.35838561 | 0.378752789 | 0.531352491 |
| cg13389211 | CCDC40   | 17 | 0.00242555 | 0.30140587 | 0.320500909 | 0.524218486 |
| cg23197939 | CCDC40   | 17 | 0.00303201 | 0.54947082 | 0.610406411 | 0.771749319 |
| cg15394558 | CCDC42;C | 17 | 0.01206219 | 0.37254062 | 0.422353346 | 0.532954585 |
| cg22110888 | CCDC57   | 17 | 0.00225052 | 0.50446295 | 0.48031743  | 0.632306604 |
| cg12879038 | CCDC57   | 17 | 0.0167445  | 0.32159635 | 0.319179897 | 0.481713529 |
| cg26507988 | CCDC57   | 17 | 0.01487501 | 0.54115397 | 0.532706923 | 0.668054445 |
| cg02967812 | CCDC57   | 17 | 0.00886166 | 0.4785976  | 0.446323891 | 0.604884608 |
| cg11935831 | CCDC57   | 17 | 0.00280849 | 0.36959766 | 0.368857575 | 0.488566041 |
| cg17751591 | CCDC57   | 17 | 0.00127437 | 0.51660205 | 0.463208043 | 0.635909673 |
| cg12113740 | CCDC68;C | 18 | 0.02512074 | 0.41319804 | 0.402673499 | 0.557519703 |
| cg11657323 | CCDC88B  | 11 | 0.00184403 | 0.18452789 | 0.168498628 | 0.317965295 |
| cg15175716 | CCDC88B  | 11 | 0.00405622 | 0.32293458 | 0.31824077  | 0.43972049  |
| cg05233289 | CCDC88B  | 11 | 0.00547327 | 0.34529312 | 0.332817462 | 0.482715588 |
| cg00156230 | CCM2;CC  | 7  | 0.00971274 | 0.1522073  | 0.13007092  | 0.277589138 |
| cg09637363 | CCND1    | 11 | 0.00151706 | 0.26826899 | 0.264952781 | 0.372649275 |
| cg06539449 | CCND1    | 11 | 0.00116059 | 0.29196314 | 0.296423912 | 0.532439744 |
| cg04717045 | CCND1    | 11 | 0.00220693 | 0.40032586 | 0.407466577 | 0.619007153 |
| cg12263469 | CCND1    | 11 | 0.00183659 | 0.50590609 | 0.490545075 | 0.625761243 |
| cg11802013 | CCND1    | 11 | 0.01717855 | 0.54194939 | 0.557432401 | 0.658686713 |
| cg12594237 | CCND2    | 12 | 0.0009934  | 0.61761727 | 0.666383523 | 0.828692178 |
| cg00417288 | CCND2    | 12 | 0.0010753  | 0.53285088 | 0.544416155 | 0.796746885 |
| cg02950701 | CCNY;CC  | 10 | 0.00804549 | 0.27901245 | 0.253315368 | 0.433218099 |
| cg09033997 | CCR9;CCF | 3  | 0.00452348 | 0.74506465 | 0.737917197 | 0.857349781 |
| cg24508095 | CD151;CI | 11 | 0.00357923 | 0.48006077 | 0.481968734 | 0.600003547 |
| cg08614201 | CD160    | 1  | 0.00096946 | 0.51782185 | 0.564334845 | 0.713779384 |
| cg15166089 | CD164L2  | 1  | 0.00757332 | 0.49323671 | 0.492219417 | 0.594935571 |
| cg07458509 | CD320;CI | 19 | 0.02630662 | 0.26244861 | 0.2381221   | 0.373436844 |
| cg17393635 | CD37;CD  | 19 | 0.00129968 | 0.3168772  | 0.321756223 | 0.442798806 |
| cg06448249 | CD79A;CI | 19 | 0.0373326  | 0.40635201 | 0.435450253 | 0.544559511 |
| cg07813265 | CDC14A;C | 1  | 0.01838071 | 0.36849492 | 0.351922057 | 0.472100317 |
| cg04715649 | CDC42BP  | 14 | 0.00736725 | 0.17618942 | 0.16001853  | 0.286921159 |
| cg14267099 | CDC42BP  | 11 | 0.02001663 | 0.47336934 | 0.42778081  | 0.585975893 |
| cg27613998 | CDC42EP  | 2  | 0.01653351 | 0.36603105 | 0.368647696 | 0.520659469 |
| cg05236720 | CDC42EP  | 2  | 0.0042711  | 0.37012051 | 0.360762402 | 0.539796695 |
| cg15703377 | CDC42EP  | 17 | 0.00106734 | 0.57553163 | 0.533214314 | 0.751583154 |
| cg27065254 | CDC42EP  | 17 | 0.00125711 | 0.31046466 | 0.289018049 | 0.468181433 |
| cg24527183 | CDC42SE  | 5  | 0.01124375 | 0.50610534 | 0.557405849 | 0.673695292 |
| cg08271366 | CDH13    | 16 | 0.01163705 | 0.14784627 | 0.132976588 | 0.279556773 |
| cg01093138 | CDH13    | 16 | 0.01760022 | 0.46769728 | 0.4777301   | 0.641546844 |
| cg05323683 | CDH17;CI | 8  | 0.00756169 | 0.14975368 | 0.129632961 | 0.292079003 |
| cg13714026 | CDH23;CI | 10 | 0.00459107 | 0.18276063 | 0.178947476 | 0.343125876 |

|            |          |    |            |            |             |             |
|------------|----------|----|------------|------------|-------------|-------------|
| cg19615295 | CDH26;CI | 20 | 0.00306113 | 0.24833768 | 0.223565094 | 0.441057944 |
| cg05376601 | CDH3     | 16 | 0.00753069 | 0.50162837 | 0.537507792 | 0.661143684 |
| cg05086443 | CDH5     | 16 | 0.00188718 | 0.45738698 | 0.48853791  | 0.594368044 |
| cg01814495 | CDIPT    | 16 | 0.00546217 | 0.44349157 | 0.406054566 | 0.56819096  |
| cg14139051 | CDK14    | 7  | 0.02555878 | 0.3514343  | 0.273751133 | 0.452232056 |
| cg24060173 | CDK18;CI | 1  | 0.00218799 | 0.19892795 | 0.203785911 | 0.303985059 |
| cg01720722 | CDK18;CI | 1  | 0.00110703 | 0.1840805  | 0.200982428 | 0.331109723 |
| cg13189671 | CDK2AP1  | 12 | 0.00318268 | 0.6924246  | 0.692975641 | 0.793183291 |
| cg14948795 | CDK2AP1  | 12 | 0.00710215 | 0.27012834 | 0.242554285 | 0.384008761 |
| cg04270264 | CDK5RAP  | 20 | 0.01838071 | 0.25704993 | 0.260762687 | 0.412907235 |
| cg17405178 | CDKAL1   | 6  | 0.02670405 | 0.239977   | 0.287110346 | 0.39272284  |
| cg05426966 | CDKL2    | 4  | 0.02129269 | 0.2865727  | 0.263419624 | 0.396714893 |
| cg02953912 | CDKN1C;( | 11 | 0.00936285 | 0.5701751  | 0.497148041 | 0.677049247 |
| cg23419490 | CDKN1C;( | 11 | 0.00439411 | 0.56047999 | 0.496777186 | 0.701288016 |
| cg01838596 | CDYL;CDY | 6  | 0.00236882 | 0.3551105  | 0.30347485  | 0.52946996  |
| cg04148753 | CDYL;CDY | 6  | 0.00252833 | 0.45551501 | 0.483877502 | 0.650623758 |
| cg01510990 | CDYL;CDY | 6  | 0.03236546 | 0.26155698 | 0.25275075  | 0.362538861 |
| cg04963575 | CELA1    | 12 | 0.00701189 | 0.53273719 | 0.525934448 | 0.634040392 |
| cg19437325 | CELSR1   | 22 | 0.02568798 | 0.15791792 | 0.17631828  | 0.278596425 |
| cg26456021 | CEMP1;A  | 16 | 0.028548   | 0.56547469 | 0.581710053 | 0.704386785 |
| cg22595230 | CENPB    | 20 | 0.02251946 | 0.20632685 | 0.21075881  | 0.31395214  |
| cg05922384 | CFH      | 1  | 0.00283173 | 0.660745   | 0.625364737 | 0.81501263  |
| cg16767221 | CGNL1    | 15 | 0.00131453 | 0.32788682 | 0.412522356 | 0.612962059 |
| cg07981370 | CHAC1;CI | 15 | 0.00704609 | 0.64927575 | 0.641068993 | 0.753264273 |
| cg22608534 | CHADL    | 22 | 0.00146177 | 0.32164673 | 0.338175382 | 0.501892871 |
| cg16195245 | CHADL    | 22 | 0.00327239 | 0.16081254 | 0.156752967 | 0.261693435 |
| cg27570892 | CHCHD4;( | 3  | 0.00273355 | 0.45504046 | 0.476336955 | 0.606993187 |
| cg04031656 | CHD9     | 16 | 0.00165917 | 0.16794604 | 0.167058504 | 0.279282033 |
| cg27567495 | CHDH     | 3  | 0.00649    | 0.22023958 | 0.224298725 | 0.350405629 |
| cg04071104 | CHDH     | 3  | 0.00459107 | 0.1560914  | 0.145102981 | 0.306118485 |
| cg21232015 | CHFR;CHI | 12 | 0.00336646 | 0.21603936 | 0.213076968 | 0.393332421 |
| cg18451156 | CHFR;CHI | 12 | 0.00429038 | 0.30354449 | 0.305222104 | 0.47551704  |
| cg20066677 | CHFR;CHI | 12 | 0.01465773 | 0.37057456 | 0.380972553 | 0.533448467 |
| cg24532476 | CHFR;CHI | 12 | 0.01788219 | 0.34794729 | 0.323767084 | 0.484646581 |
| cg04002957 | CHID1;CH | 11 | 0.01414127 | 0.74952414 | 0.745466059 | 0.875038613 |
| cg13318256 | CHKA;CHI | 11 | 0.00499723 | 0.2382817  | 0.212250327 | 0.404066503 |
| cg16087630 | CHKA;CHI | 11 | 0.00077468 | 0.52691608 | 0.612906388 | 0.717674682 |
| cg08723459 | CHMP1A;  | 16 | 0.00151706 | 0.60452583 | 0.580920504 | 0.731025712 |
| cg01497921 | CHMP1A;  | 16 | 0.01111549 | 0.42683078 | 0.41020181  | 0.560449403 |
| cg25706861 | CHPF     | 2  | 0.02389893 | 0.64467922 | 0.644951695 | 0.76554619  |
| cg18406852 | CHST10   | 2  | 0.00898993 | 0.19407378 | 0.191641673 | 0.34214234  |
| cg11117177 | CHST11   | 12 | 0.00471011 | 0.32946955 | 0.354583149 | 0.499051187 |
| cg16255541 | CHST12   | 7  | 0.00285469 | 0.68760101 | 0.687934537 | 0.801495179 |
| cg19698242 | CHST3    | 10 | 0.00211366 | 0.14841173 | 0.152594043 | 0.305144974 |
| cg14496909 | CHSY1    | 15 | 0.00217021 | 0.50757077 | 0.52179951  | 0.676085196 |
| cg13902101 | CHSY1    | 15 | 0.00521564 | 0.42157541 | 0.421179985 | 0.636902815 |



|            |          |    |            |            |             |             |
|------------|----------|----|------------|------------|-------------|-------------|
| cg24927646 | CHSY1    | 15 | 0.02103552 | 0.22928027 | 0.244599359 | 0.406197014 |
| cg08080395 | CILP     | 15 | 0.02252189 | 0.61247983 | 0.627160712 | 0.736900855 |
| cg23323879 | CILP     | 15 | 0.01861071 | 0.31543542 | 0.348220956 | 0.467548266 |
| cg13356370 | CILP     | 15 | 0.01206219 | 0.31122074 | 0.359948693 | 0.495567972 |
| cg25896785 | CILP     | 15 | 0.01828536 | 0.59867051 | 0.617835316 | 0.727077335 |
| cg26635955 | CILP2    | 19 | 0.00237009 | 0.14055594 | 0.15729962  | 0.270066605 |
| cg03186620 | CILP2    | 19 | 0.00591291 | 0.25107169 | 0.242770076 | 0.385506966 |
| cg03339668 | CIT      | 12 | 0.00799281 | 0.26282448 | 0.209032983 | 0.391560074 |
| cg26097051 | CIT      | 12 | 0.01665552 | 0.27647429 | 0.237665609 | 0.380183394 |
| cg07180571 | CLASP1;C | 2  | 0.04937176 | 0.28310535 | 0.2507386   | 0.402489992 |
| cg10950615 | CLASP1;C | 2  | 0.00103697 | 0.63761246 | 0.689961284 | 0.80244674  |
| cg16591681 | CLCNKA;C | 1  | 0.0012026  | 0.27799879 | 0.301018824 | 0.437940004 |
| cg09808075 | CLCNKB   | 1  | 0.01502763 | 0.30226234 | 0.260432849 | 0.459397966 |
| cg09413450 | CLCNKB   | 1  | 0.00569156 | 0.2036163  | 0.209917027 | 0.320652856 |
| cg21660130 | CLCNKB   | 1  | 0.03760037 | 0.31579187 | 0.269996035 | 0.488093131 |
| cg11744304 | CLDN15   | 7  | 0.0063774  | 0.30790289 | 0.264253557 | 0.410886817 |
| cg02512860 | CLDN15   | 7  | 0.00131467 | 0.37274315 | 0.395841276 | 0.510978254 |
| cg27507254 | CLDN19;C | 1  | 0.01446513 | 0.34836238 | 0.328231413 | 0.450522233 |
| cg08082763 | CLEC16A  | 16 | 0.00128133 | 0.25847999 | 0.280352715 | 0.42610675  |
| cg00027155 | CLEC16A  | 16 | 0.02009829 | 0.51195306 | 0.460204019 | 0.664082192 |
| cg26597734 | CLEC16A  | 16 | 0.00116579 | 0.13564465 | 0.153492695 | 0.338024408 |
| cg08166431 | CLEC16A  | 16 | 0.01705178 | 0.39247368 | 0.416161303 | 0.519443813 |
| cg06636831 | CLEC3B   | 3  | 0.00515676 | 0.22395724 | 0.220549989 | 0.338154452 |
| cg13423383 | CLIC3    | 9  | 0.01248948 | 0.19585096 | 0.169737648 | 0.299941511 |
| cg17878351 | CLIC5    | 6  | 0.02388672 | 0.6347493  | 0.634212372 | 0.739666714 |
| cg03058520 | CLK3;CLK | 15 | 0.00318676 | 0.56966747 | 0.540857881 | 0.691894063 |
| cg17808195 | CLRN1;CL | 3  | 0.01750308 | 0.43146487 | 0.478216997 | 0.594993655 |
| cg19981828 | CLRN1;CL | 3  | 0.01272761 | 0.32717421 | 0.344194255 | 0.459467186 |
| cg12182284 | CLTB;CLT | 5  | 0.00704609 | 0.40546052 | 0.372124632 | 0.546778079 |
| cg24911827 | CLTCL1;C | 22 | 0.00260155 | 0.27545802 | 0.296430929 | 0.408203294 |
| cg03129774 | CLUAP1   | 16 | 0.00285259 | 0.12925798 | 0.132075366 | 0.34185977  |
| cg07751214 | CLUAP1;C | 16 | 0.00597821 | 0.44627787 | 0.508916798 | 0.623269187 |
| cg04963697 | CLUAP1;C | 16 | 0.04030438 | 0.16065139 | 0.133455463 | 0.262164919 |
| cg27300028 | CLYBL    | 13 | 0.02016391 | 0.52379113 | 0.560999501 | 0.684634939 |
| cg24852561 | CLYBL    | 13 | 0.00176484 | 0.50071587 | 0.488739214 | 0.652848963 |
| cg23284609 | CMBL     | 5  | 0.00183809 | 0.32742278 | 0.377453619 | 0.515120649 |
| cg05705335 | CMIP     | 16 | 0.00654696 | 0.31838435 | 0.278997035 | 0.420012908 |
| cg16353318 | CMIP;CM  | 16 | 0.00066232 | 0.34762364 | 0.431372714 | 0.577492543 |
| cg01761552 | CMIP;CM  | 16 | 0.01825754 | 0.49362146 | 0.465643266 | 0.638516261 |
| cg03122201 | CMIP;CM  | 16 | 0.00775785 | 0.24811584 | 0.201136488 | 0.383355181 |
| cg06896529 | CMIP;CM  | 16 | 0.01817641 | 0.28876916 | 0.229208165 | 0.393470326 |
| cg09963814 | CMIP;CM  | 16 | 0.003807   | 0.25042237 | 0.21231073  | 0.363284125 |
| cg08682723 | CMIP;CM  | 16 | 0.00382061 | 0.3063223  | 0.297534044 | 0.442169093 |
| cg02053054 | CMTM1;C  | 16 | 0.02753865 | 0.55501427 | 0.438862648 | 0.66077393  |
| cg05404009 | CMTM4;C  | 16 | 0.00756169 | 0.17742999 | 0.133303891 | 0.283558024 |
| cg06715352 | CMTM4;C  | 16 | 0.00174928 | 0.58177583 | 0.672266146 | 0.781926878 |

|            |         |    |            |            |             |             |
|------------|---------|----|------------|------------|-------------|-------------|
| cg22843111 | CMYA5   | 5  | 0.02841543 | 0.2182324  | 0.161191787 | 0.355625228 |
| cg05226518 | CNIH    | 14 | 0.00209505 | 0.35210222 | 0.362763675 | 0.601489397 |
| cg27269110 | CNKS3   | 6  | 0.00119385 | 0.36852215 | 0.421689508 | 0.640403627 |
| cg16175941 | CNKS3   | 6  | 0.00184921 | 0.2326764  | 0.28977731  | 0.466569994 |
| cg13777287 | CNKS3   | 6  | 0.02794807 | 0.24912201 | 0.256974302 | 0.362056468 |
| cg12448539 | CNN3    | 1  | 0.00352201 | 0.34509817 | 0.380445417 | 0.578802737 |
| cg19164761 | CNN3    | 1  | 0.00958772 | 0.24515899 | 0.248306499 | 0.400081699 |
| cg26096304 | CNOT6   | 5  | 0.02794807 | 0.40824857 | 0.424355829 | 0.550569608 |
| cg16563470 | CNP     | 17 | 0.01430792 | 0.17327772 | 0.154374511 | 0.280483677 |
| cg21692620 | CNTNAP1 | 17 | 0.00293735 | 0.11778556 | 0.141919096 | 0.248252416 |
| cg07871971 | CNTNAP1 | 17 | 0.00941939 | 0.52067527 | 0.498827234 | 0.642839042 |
| cg10524687 | COBL    | 7  | 0.01677529 | 0.55648267 | 0.560497138 | 0.686398996 |
| cg04723449 | COG7    | 16 | 0.00122881 | 0.41392572 | 0.459534729 | 0.602558067 |
| cg02890435 | COL11A2 | 6  | 0.00081413 | 0.32242304 | 0.354197366 | 0.462568164 |
| cg26867987 | COL11A2 | 6  | 0.00436875 | 0.20757598 | 0.200170969 | 0.327744253 |
| cg04249605 | COL11A2 | 6  | 0.00131641 | 0.27105776 | 0.295729339 | 0.467515632 |
| cg12881453 | COL11A2 | 6  | 0.00175728 | 0.16449203 | 0.171670568 | 0.30510631  |
| cg08077736 | COL11A2 | 6  | 0.00124152 | 0.20383727 | 0.233035324 | 0.389364517 |
| cg19887293 | COL11A2 | 6  | 0.00155292 | 0.31471809 | 0.361504692 | 0.478815782 |
| cg17790159 | COL11A2 | 6  | 0.00233298 | 0.18351899 | 0.20518166  | 0.315553532 |
| cg02667414 | COL11A2 | 6  | 0.00074016 | 0.56736933 | 0.609466963 | 0.715835528 |
| cg03500646 | COL11A2 | 6  | 0.00296695 | 0.22258792 | 0.230591908 | 0.36468008  |
| cg25482983 | COL11A2 | 6  | 0.00777499 | 0.25311678 | 0.274459214 | 0.395608086 |
| cg22748722 | COL11A2 | 6  | 0.00069166 | 0.43115949 | 0.499373401 | 0.675299966 |
| cg21205776 | COL11A2 | 6  | 0.00065949 | 0.29968003 | 0.405146404 | 0.601654109 |
| cg00514307 | COL11A2 | 6  | 0.00234919 | 0.55277917 | 0.56239716  | 0.711208133 |
| cg15173443 | COL11A2 | 6  | 0.00065949 | 0.37914343 | 0.456355913 | 0.649702046 |
| cg23912266 | COL11A2 | 6  | 0.0009934  | 0.342315   | 0.425257478 | 0.541027922 |
| cg01320908 | COL11A2 | 6  | 0.00129968 | 0.55421663 | 0.597286199 | 0.744931375 |
| cg00920162 | COL11A2 | 6  | 0.00177694 | 0.3226058  | 0.377561023 | 0.547160474 |
| cg18384402 | COL11A2 | 6  | 0.00142756 | 0.51443716 | 0.523630816 | 0.671611501 |
| cg22361816 | COL11A2 | 6  | 0.00065949 | 0.37464191 | 0.46649034  | 0.568569478 |
| cg00936309 | COL11A2 | 6  | 0.00076471 | 0.33802436 | 0.427604173 | 0.531184534 |
| cg15818109 | COL11A2 | 6  | 0.00065949 | 0.23836774 | 0.354486794 | 0.540993045 |
| cg00866054 | COL11A2 | 6  | 0.00134532 | 0.25440029 | 0.284691869 | 0.416285111 |
| cg05738403 | COL11A2 | 6  | 0.00077183 | 0.32321323 | 0.354752832 | 0.484891375 |
| cg16139380 | COL11A2 | 6  | 0.00078819 | 0.37667749 | 0.441734135 | 0.573356738 |
| cg20427378 | COL11A2 | 6  | 0.00065949 | 0.22358249 | 0.289310594 | 0.391410294 |
| cg12228461 | COL11A2 | 6  | 0.00227382 | 0.28081166 | 0.311119827 | 0.496062845 |
| cg17636806 | COL11A2 | 6  | 0.00108672 | 0.33205829 | 0.376204742 | 0.48441119  |
| cg27590742 | COL11A2 | 6  | 0.00088728 | 0.66205741 | 0.699797364 | 0.818722911 |
| cg12312338 | COL11A2 | 6  | 0.00431388 | 0.33421136 | 0.327172763 | 0.4410494   |
| cg08733307 | COL11A2 | 6  | 0.00745134 | 0.20624434 | 0.183714558 | 0.329625583 |
| cg14683730 | COL11A2 | 6  | 0.00159903 | 0.17090595 | 0.187678077 | 0.368447891 |
| cg12947757 | COL11A2 | 6  | 0.00068904 | 0.30393093 | 0.347111776 | 0.517593088 |
| cg26322749 | COL11A2 | 6  | 0.00074016 | 0.41751152 | 0.491789366 | 0.691565446 |

|            |         |    |            |            |             |             |
|------------|---------|----|------------|------------|-------------|-------------|
| cg18375610 | COL11A2 | 6  | 0.00065949 | 0.43667206 | 0.525677317 | 0.700421003 |
| cg22161893 | COL11A2 | 6  | 0.00070285 | 0.3822725  | 0.484239417 | 0.667705476 |
| cg12061370 | COL11A2 | 6  | 0.00107089 | 0.26183752 | 0.335802872 | 0.510108123 |
| cg24311693 | COL11A2 | 6  | 0.00126816 | 0.25535762 | 0.278167592 | 0.527983076 |
| cg09261794 | COL11A2 | 6  | 0.0012504  | 0.17011996 | 0.238773093 | 0.399383734 |
| cg18624108 | COL11A2 | 6  | 0.00065949 | 0.50878378 | 0.564396212 | 0.691719642 |
| cg10736955 | COL11A2 | 6  | 0.00074801 | 0.40568241 | 0.509282203 | 0.704196677 |
| cg14466923 | COL11A2 | 6  | 0.00142756 | 0.31116894 | 0.348532149 | 0.473603976 |
| cg01412022 | COL11A2 | 6  | 0.00149569 | 0.2149322  | 0.239002186 | 0.448089331 |
| cg02230225 | COL11A2 | 6  | 0.00098847 | 0.3643795  | 0.427500625 | 0.644226451 |
| cg07457375 | COL11A2 | 6  | 0.00131453 | 0.1338013  | 0.145865811 | 0.315279105 |
| cg13617209 | COL11A2 | 6  | 0.00153162 | 0.20818605 | 0.260423315 | 0.429684276 |
| cg03260211 | COL11A2 | 6  | 0.00092849 | 0.279749   | 0.337904098 | 0.479920885 |
| cg20269729 | COL11A2 | 6  | 0.000777   | 0.29522659 | 0.372239779 | 0.566994594 |
| cg26981781 | COL11A2 | 6  | 0.00074801 | 0.3092619  | 0.35618754  | 0.525106002 |
| cg09502339 | COL11A2 | 6  | 0.00112679 | 0.25441634 | 0.329982749 | 0.495486461 |
| cg00501482 | COL11A2 | 6  | 0.0020498  | 0.3607626  | 0.485198715 | 0.58857367  |
| cg15239679 | COL11A2 | 6  | 0.00646891 | 0.20036313 | 0.206283414 | 0.344015463 |
| cg01194674 | COL11A2 | 6  | 0.00240796 | 0.16533001 | 0.180129112 | 0.333682432 |
| cg20798604 | COL11A2 | 6  | 0.00078196 | 0.21569234 | 0.296676371 | 0.430900014 |
| cg17596257 | COL11A2 | 6  | 0.00352201 | 0.3810836  | 0.477383614 | 0.593663845 |
| cg04653627 | COL11A2 | 6  | 0.00144989 | 0.47674044 | 0.548846111 | 0.654625181 |
| cg18671115 | COL11A2 | 6  | 0.00104158 | 0.26565772 | 0.358068944 | 0.568416809 |
| cg04182805 | COL11A2 | 6  | 0.00111057 | 0.43578625 | 0.476654745 | 0.660715866 |
| cg01806857 | COL11A2 | 6  | 0.00147518 | 0.18613224 | 0.219611986 | 0.37186747  |
| cg24864639 | COL11A2 | 6  | 0.00068904 | 0.25538975 | 0.313218622 | 0.449612298 |
| cg17591573 | COL11A2 | 6  | 0.00240535 | 0.21584743 | 0.217322949 | 0.444483663 |
| cg03790047 | COL11A2 | 6  | 0.00079512 | 0.37195145 | 0.442477033 | 0.621520307 |
| cg21509966 | COL11A2 | 6  | 0.00248997 | 0.30928658 | 0.336994811 | 0.518932706 |
| cg23704085 | COL11A2 | 6  | 0.0013522  | 0.14655169 | 0.184515674 | 0.356122497 |
| cg11835806 | COL11A2 | 6  | 0.00081789 | 0.24944368 | 0.297676546 | 0.493797823 |
| cg01680268 | COL11A2 | 6  | 0.00179679 | 0.16241714 | 0.171054193 | 0.35794721  |
| cg00505762 | COL11A2 | 6  | 0.00207996 | 0.17869348 | 0.188975589 | 0.347181819 |
| cg23231727 | COL11A2 | 6  | 0.00126804 | 0.13627571 | 0.157682688 | 0.259970303 |
| cg22501449 | COL11A2 | 6  | 0.00077468 | 0.18111971 | 0.231444269 | 0.404461693 |
| cg03783258 | COL11A2 | 6  | 0.00117602 | 0.17645487 | 0.210172813 | 0.375650905 |
| cg11411509 | COL11A2 | 6  | 0.00878866 | 0.17264505 | 0.172898008 | 0.359805551 |
| cg19628686 | COL11A2 | 6  | 0.00917376 | 0.19700322 | 0.211731299 | 0.364875453 |
| cg12472351 | COL11A2 | 6  | 0.00660543 | 0.13580206 | 0.139122887 | 0.250161861 |
| cg15089846 | COL12A1 | 6  | 0.00388546 | 0.64498422 | 0.661466718 | 0.775695825 |
| cg20436086 | COL13A1 | 10 | 0.0018139  | 0.21174131 | 0.232758004 | 0.424755164 |
| cg24488229 | COL16A1 | 1  | 0.00262147 | 0.21622937 | 0.228695766 | 0.342394658 |
| cg08930131 | COL23A1 | 5  | 0.04063967 | 0.2408224  | 0.257278882 | 0.364429036 |
| cg04011940 | COL25A1 | 4  | 0.04706253 | 0.26166853 | 0.26944818  | 0.408328566 |
| cg03758241 | COL27A1 | 9  | 0.00193378 | 0.16912999 | 0.158978511 | 0.304264016 |
| cg04382108 | COL27A1 | 9  | 0.00427027 | 0.2288486  | 0.2095251   | 0.332456949 |

|            |          |    |            |            |             |             |
|------------|----------|----|------------|------------|-------------|-------------|
| cg13427810 | COL27A1  | 9  | 0.00161582 | 0.33775733 | 0.408366975 | 0.640910324 |
| cg14031246 | COL27A1  | 9  | 0.00175545 | 0.5926804  | 0.568498429 | 0.697720503 |
| cg15108410 | COL2A1;C | 12 | 0.00302211 | 0.22995589 | 0.245166646 | 0.387649026 |
| cg15465823 | COL2A1;C | 12 | 0.00644172 | 0.17315113 | 0.140043358 | 0.322818153 |
| cg08715466 | COL2A1;C | 12 | 0.00131453 | 0.23422582 | 0.269931999 | 0.452844337 |
| cg10502244 | COL2A1;C | 12 | 0.00314038 | 0.20966422 | 0.217125499 | 0.338733519 |
| cg01906695 | COL2A1;C | 12 | 0.00281543 | 0.22681578 | 0.253368334 | 0.36614509  |
| cg08234256 | COL4A1   | 13 | 0.00894518 | 0.20262014 | 0.201556956 | 0.3262388   |
| cg00050792 | COL4A1   | 13 | 0.00565829 | 0.1855926  | 0.184257114 | 0.305058349 |
| cg13618741 | COL5A1   | 9  | 0.01060969 | 0.24830214 | 0.239427538 | 0.371782826 |
| cg13567205 | COL5A1   | 9  | 0.00548311 | 0.53778712 | 0.51749637  | 0.641646076 |
| cg22247792 | COL6A2;C | 21 | 0.0017241  | 0.4443887  | 0.480733147 | 0.660354032 |
| cg20502977 | COL6A3;C | 2  | 0.02443534 | 0.38090934 | 0.310852486 | 0.533479046 |
| cg03878567 | COL9A1;C | 6  | 0.00478553 | 0.30038852 | 0.285650779 | 0.533087464 |
| cg10210510 | COL9A2   | 1  | 0.00532167 | 0.29705515 | 0.359997861 | 0.470966133 |
| cg03059921 | COL9A3   | 20 | 0.00109888 | 0.27974865 | 0.295686395 | 0.449659539 |
| cg07305723 | COL9A3   | 20 | 0.00189637 | 0.44362576 | 0.459735766 | 0.569501409 |
| cg06598544 | COL9A3   | 20 | 0.00358374 | 0.34232745 | 0.35179317  | 0.546339595 |
| cg25597307 | COLQ;CO  | 3  | 0.02728203 | 0.29155714 | 0.317373521 | 0.419389408 |
| cg20950633 | COLQ;CO  | 3  | 0.00539114 | 0.60407499 | 0.58990966  | 0.71796491  |
| cg24888814 | COPZ1    | 12 | 0.00568196 | 0.34501138 | 0.364732566 | 0.546959855 |
| cg18957463 | CORIN    | 4  | 0.00821138 | 0.15012454 | 0.10459919  | 0.263001741 |
| cg12449974 | CORO2B   | 15 | 0.00126208 | 0.24435464 | 0.226009923 | 0.565817899 |
| cg01678309 | CORO2B   | 15 | 0.00587243 | 0.19359447 | 0.192371964 | 0.310293205 |
| cg02351655 | CORO7    | 16 | 0.01342353 | 0.27789312 | 0.263612117 | 0.40046182  |
| cg09069446 | CORO7    | 16 | 0.00182121 | 0.35930345 | 0.368332259 | 0.469551526 |
| cg20163085 | CORT;API | 1  | 0.02175305 | 0.57396972 | 0.581375548 | 0.683802022 |
| cg24876069 | CP       | 3  | 0.01738159 | 0.44273202 | 0.491901649 | 0.620601622 |
| cg03951662 | CPD      | 17 | 0.0103161  | 0.50267655 | 0.511832293 | 0.677756203 |
| cg11043571 | CPE      | 4  | 0.00894518 | 0.17778525 | 0.168055525 | 0.302082819 |
| cg01708636 | CPE      | 4  | 0.00626125 | 0.24704402 | 0.283077888 | 0.443444074 |
| cg23427348 | CPE      | 4  | 0.01585898 | 0.33327181 | 0.434819053 | 0.556794984 |
| cg15341575 | CPEB3    | 10 | 0.00911882 | 0.188087   | 0.184675183 | 0.354358696 |
| cg16710448 | CPSF3    | 2  | 0.01598777 | 0.58836293 | 0.555281756 | 0.703945658 |
| cg03101058 | CPSF4L   | 17 | 0.00139627 | 0.3647549  | 0.401732806 | 0.570820534 |
| cg15211864 | CPT1A;CF | 11 | 0.01096356 | 0.22733213 | 0.203491596 | 0.391716302 |
| cg04732324 | CPT1A;CF | 11 | 0.00184894 | 0.59247329 | 0.634071006 | 0.750945708 |
| cg26906629 | CPT1A;CF | 11 | 0.00207771 | 0.41685032 | 0.435140292 | 0.596288948 |
| cg20285002 | CPT1A;CF | 11 | 0.00218837 | 0.68720371 | 0.694954601 | 0.795077676 |
| cg23729283 | CPVL;CPV | 7  | 0.00666111 | 0.43876363 | 0.492206442 | 0.635650036 |
| cg19573230 | CREB3L2  | 7  | 0.00127413 | 0.43233394 | 0.471778715 | 0.615563027 |
| cg13016916 | CREB3L2  | 7  | 0.03618565 | 0.17746054 | 0.194737511 | 0.296828922 |
| cg13495373 | CREB5;CF | 7  | 0.00617894 | 0.34254815 | 0.375349911 | 0.50013264  |
| cg07042532 | CREB5;CF | 7  | 0.00217021 | 0.39670956 | 0.407182087 | 0.551842442 |
| cg14862787 | CREB5;CF | 7  | 0.0048909  | 0.57385679 | 0.566105162 | 0.692235317 |
| cg12552104 | CREB5;CF | 7  | 0.00181052 | 0.26713612 | 0.293568726 | 0.483504717 |

|            |          |    |            |            |             |             |
|------------|----------|----|------------|------------|-------------|-------------|
| cg20315150 | CREB5;CF | 7  | 0.00687165 | 0.44665745 | 0.452808283 | 0.632057621 |
| cg22681186 | CREB5;CF | 7  | 0.01934763 | 0.42285467 | 0.448964606 | 0.589800888 |
| cg20306842 | CREB5;CF | 7  | 0.00997311 | 0.16542385 | 0.177663599 | 0.307277654 |
| cg09450153 | CREB5;CF | 7  | 0.0039383  | 0.23783731 | 0.265356331 | 0.381512368 |
| cg21159940 | CREB5;CF | 7  | 0.00420024 | 0.21314888 | 0.198235343 | 0.39198291  |
| cg19588408 | CREB5;CF | 7  | 0.0063774  | 0.31769741 | 0.268601681 | 0.47728336  |
| cg19559984 | CREB5;CF | 7  | 0.01608519 | 0.30648015 | 0.279827654 | 0.441159955 |
| cg04704487 | CRISPLD2 | 16 | 0.00316669 | 0.1884569  | 0.175978987 | 0.367969173 |
| cg09967633 | CRISPLD2 | 16 | 0.00172495 | 0.38223642 | 0.430934396 | 0.626231264 |
| cg13407975 | CRLF1    | 19 | 0.00077582 | 0.0717728  | 0.112319367 | 0.221643428 |
| cg09721078 | CRLF3    | 17 | 0.0261165  | 0.54826416 | 0.568878343 | 0.697804499 |
| cg14973240 | CROCC    | 1  | 0.00905238 | 0.14206805 | 0.094494239 | 0.265777836 |
| cg10558598 | CROCCL1  | 1  | 0.0026668  | 0.29568072 | 0.261896219 | 0.407964721 |
| cg25680629 | CRTAP    | 3  | 0.01595775 | 0.15666047 | 0.127416171 | 0.263638876 |
| cg07015183 | CRTC1;CF | 19 | 0.00379797 | 0.55397183 | 0.504528088 | 0.685145366 |
| cg02961385 | CRTC1;CF | 19 | 0.00769304 | 0.26111586 | 0.231904376 | 0.429880932 |
| cg01874562 | CRTC1;CF | 19 | 0.00186737 | 0.15416369 | 0.150225283 | 0.273876813 |
| cg03073714 | CRY1     | 12 | 0.03879786 | 0.47214615 | 0.463274184 | 0.6290148   |
| cg08688043 | CRYBA1   | 17 | 0.00379918 | 0.40335454 | 0.409275777 | 0.559917716 |
| cg25221625 | CRYBB3   | 22 | 0.00143965 | 0.56091982 | 0.561117567 | 0.687829221 |
| cg03244494 | CRYL1    | 13 | 0.01693242 | 0.3389497  | 0.431198468 | 0.534203057 |
| cg24580724 | CRYZ;CRY | 1  | 0.01219095 | 0.28971169 | 0.235898526 | 0.425965931 |
| cg18636739 | CSDA;CSC | 12 | 0.03477069 | 0.17324699 | 0.145375992 | 0.274061418 |
| cg20704330 | CSF2     | 5  | 0.00344347 | 0.53388013 | 0.509112099 | 0.652049075 |
| cg00158770 | CSGALNA  | 8  | 0.00077468 | 0.33571845 | 0.397007528 | 0.54844068  |
| cg07169233 | CSGALNA  | 8  | 0.00298275 | 0.36494621 | 0.468932679 | 0.611648315 |
| cg12059540 | CSGALNA  | 8  | 0.00425638 | 0.23296353 | 0.258246691 | 0.400384442 |
| cg01129958 | CSGALNA  | 8  | 0.00748334 | 0.38165481 | 0.384249231 | 0.590258615 |
| cg06129556 | CSNK1G1  | 15 | 0.00426288 | 0.32823725 | 0.334965793 | 0.587445036 |
| cg06470424 | CSNK1G2  | 19 | 0.00983482 | 0.26088584 | 0.222908334 | 0.376220795 |
| cg05729827 | CSPG4    | 15 | 0.00262388 | 0.46397274 | 0.456434608 | 0.580787682 |
| cg05208483 | CSPG4    | 15 | 0.00220808 | 0.45210462 | 0.420217633 | 0.606017692 |
| cg06734519 | CSPG4    | 15 | 0.00103895 | 0.55688347 | 0.567099478 | 0.739215628 |
| cg21460582 | CSPG4    | 15 | 0.00315764 | 0.11753816 | 0.11725306  | 0.232201135 |
| cg03238581 | CSPG4    | 15 | 0.00396544 | 0.09903118 | 0.0839921   | 0.229009462 |
| cg14029169 | CST3     | 20 | 0.00084118 | 0.55952114 | 0.646992    | 0.789923767 |
| cg12525219 | CTBP1;CT | 4  | 0.00165724 | 0.60784579 | 0.590274726 | 0.709838957 |
| cg09758273 | CTBP1;CT | 4  | 0.00429038 | 0.54501004 | 0.541387331 | 0.64501247  |
| cg21373263 | CTBP2;CT | 10 | 0.03003784 | 0.41303969 | 0.478642943 | 0.60409638  |
| cg17523415 | CTBP2;CT | 10 | 0.00330705 | 0.56524773 | 0.587607574 | 0.709457441 |
| cg06240209 | CTBP2;CT | 10 | 0.00065949 | 0.55892212 | 0.723288333 | 0.825651386 |
| cg07237540 | CTDP1;CT | 18 | 0.0034485  | 0.43980972 | 0.490463234 | 0.631236745 |
| cg07753598 | CTDSP1;C | 2  | 0.00149569 | 0.49696769 | 0.411636824 | 0.653154766 |
| cg03228931 | CTDSP2   | 12 | 0.00809353 | 0.54674549 | 0.519450412 | 0.661951324 |
| cg27606822 | CTDSP2;N | 12 | 0.00150566 | 0.62142544 | 0.613260384 | 0.735588179 |
| cg13333722 | CTDSPL;C | 3  | 0.00131641 | 0.62399569 | 0.63742124  | 0.768907878 |

|            |          |    |            |            |             |             |
|------------|----------|----|------------|------------|-------------|-------------|
| cg08171483 | CTDSPL;C | 3  | 0.0040421  | 0.12633301 | 0.117946114 | 0.237711776 |
| cg05740575 | CTHRC1   | 8  | 0.00430896 | 0.17404497 | 0.146047032 | 0.351373029 |
| cg01156295 | CTNNA1;I | 5  | 0.01236318 | 0.36570642 | 0.31202839  | 0.527692615 |
| cg11677683 | CTNNA1;I | 5  | 0.02108987 | 0.2274988  | 0.165265609 | 0.333640371 |
| cg27004195 | CTNNA2;I | 2  | 0.01776628 | 0.24625083 | 0.261396247 | 0.383981526 |
| cg12232373 | CTNS;CTN | 17 | 0.00452348 | 0.58293058 | 0.575495056 | 0.683966506 |
| cg16118839 | CTSC;CTS | 11 | 0.00339981 | 0.39744581 | 0.482139688 | 0.607620007 |
| cg08914150 | CTTN;CTT | 11 | 0.00173084 | 0.57784635 | 0.652963578 | 0.787963885 |
| cg22720428 | CTTN;CTT | 11 | 0.00099363 | 0.26000364 | 0.363865586 | 0.512711005 |
| cg02011981 | CTTN;CTT | 11 | 0.00597821 | 0.54787407 | 0.60705682  | 0.734782582 |
| cg13096351 | CTTN;CTT | 11 | 0.03960534 | 0.1996842  | 0.169986282 | 0.310216297 |
| cg12030523 | CTXN3;CT | 5  | 0.02111416 | 0.38531018 | 0.431321808 | 0.536790774 |
| cg08581745 | CUBN     | 10 | 0.00248015 | 0.17242828 | 0.158689083 | 0.36392348  |
| cg06352464 | CUGBP2;C | 10 | 0.00405622 | 0.22684014 | 0.199458744 | 0.479698928 |
| cg11086547 | CUGBP2;C | 10 | 0.02856411 | 0.28438467 | 0.333420645 | 0.434100057 |
| cg20080282 | CUL5     | 11 | 0.00334886 | 0.15940657 | 0.160883578 | 0.311425659 |
| cg20567148 | CUX1;CU; | 7  | 0.00630045 | 0.30002299 | 0.210990121 | 0.440058654 |
| cg24420432 | CUX1;CU; | 7  | 0.00471011 | 0.23856703 | 0.188481155 | 0.423927023 |
| cg14466759 | CUX1;CU; | 7  | 0.00218799 | 0.22119723 | 0.223848237 | 0.48920694  |
| cg26570844 | CUX1;CU; | 7  | 0.00118031 | 0.18462378 | 0.211562246 | 0.492550478 |
| cg24183566 | CUX1;CU; | 7  | 0.02577962 | 0.24695751 | 0.200384172 | 0.359161426 |
| cg02911387 | CUX1;CU; | 7  | 0.00089741 | 0.21285913 | 0.266418894 | 0.408212456 |
| cg17472610 | CUX1;CU; | 7  | 0.00215533 | 0.22455299 | 0.238760973 | 0.364339862 |
| cg07266412 | CUX1;CU; | 7  | 0.00247734 | 0.27371591 | 0.301920218 | 0.492604022 |
| cg17713751 | CUX1;CU; | 7  | 0.00187837 | 0.44346045 | 0.423783099 | 0.586006478 |
| cg12349350 | CUX1;CU; | 7  | 0.00169556 | 0.26157564 | 0.320247342 | 0.550803271 |
| cg14203426 | CUX1;CU; | 7  | 0.00367708 | 0.37410037 | 0.407138687 | 0.560933892 |
| cg18483404 | CUZD1    | 10 | 0.00134844 | 0.25140381 | 0.285806473 | 0.466985769 |
| cg05724197 | CX3CL1   | 16 | 0.00669541 | 0.37258384 | 0.366076398 | 0.481895994 |
| cg22908000 | CXCR7    | 2  | 0.02720807 | 0.20489032 | 0.192410713 | 0.311783944 |
| cg13707793 | CXXC5    | 5  | 0.00466622 | 0.18240861 | 0.160542447 | 0.297754555 |
| cg17306279 | CXXC5    | 5  | 0.00367963 | 0.36252019 | 0.334137394 | 0.472833543 |
| cg23167035 | CXXC5    | 5  | 0.00219711 | 0.39261904 | 0.390085234 | 0.529546223 |
| cg22741735 | CXXC5    | 5  | 0.00513872 | 0.22277782 | 0.217637829 | 0.337447501 |
| cg05227215 | CXXC5    | 5  | 0.00555868 | 0.22783191 | 0.214251348 | 0.378362309 |
| cg14876315 | CXXC5    | 5  | 0.0009934  | 0.56227492 | 0.519843431 | 0.714024254 |
| cg06905511 | CXXC5    | 5  | 0.00206218 | 0.18703036 | 0.188351188 | 0.355033101 |
| cg15290965 | CYB5R2   | 11 | 0.00209505 | 0.18887607 | 0.179152314 | 0.336418905 |
| cg02603251 | CYFIP2;C | 5  | 0.0026958  | 0.34304349 | 0.362947886 | 0.518266891 |
| cg04790755 | CYHR1;CY | 8  | 0.0065693  | 0.32669948 | 0.350429343 | 0.466029279 |
| cg21181051 | CYP20A1  | 2  | 0.00568196 | 0.26571171 | 0.307289411 | 0.478450354 |
| cg20822767 | CYP20A1  | 2  | 0.03960534 | 0.48004039 | 0.485785217 | 0.631594968 |
| cg14577373 | CYP20A1  | 2  | 0.00886166 | 0.17397854 | 0.188350592 | 0.315997286 |
| cg04586286 | CYP26B1  | 2  | 0.00152405 | 0.73314642 | 0.73180959  | 0.847280979 |
| cg01959421 | CYP26B1  | 2  | 0.00128725 | 0.13625342 | 0.14534416  | 0.340712324 |
| cg00999152 | CYP26B1  | 2  | 0.0082702  | 0.33850775 | 0.287734869 | 0.492931932 |

|            |          |    |            |            |             |             |
|------------|----------|----|------------|------------|-------------|-------------|
| cg14447606 | CYP26B1  | 2  | 0.0017637  | 0.09476764 | 0.11186234  | 0.21755167  |
| cg09233204 | CYP26C1  | 10 | 0.01160447 | 0.25248106 | 0.260309513 | 0.400852038 |
| cg11234637 | CYP26C1  | 10 | 0.0034485  | 0.31603835 | 0.333240327 | 0.44994767  |
| cg04564481 | CYP26C1  | 10 | 0.0020873  | 0.2591481  | 0.264922946 | 0.379661049 |
| cg25083618 | CYP26C1  | 10 | 0.00297171 | 0.21890693 | 0.212937026 | 0.327883939 |
| cg20293609 | CYR61    | 1  | 0.01725665 | 0.19876417 | 0.173708482 | 0.324492587 |
| cg13562102 | CYTH3    | 7  | 0.00554206 | 0.50341851 | 0.476232754 | 0.608280636 |
| cg08687948 | CYTH3    | 7  | 0.00261671 | 0.24367309 | 0.226777152 | 0.424959925 |
| cg08893109 | CYTH3    | 7  | 0.00160732 | 0.64177939 | 0.676303067 | 0.816841495 |
| cg20492034 | CYTH3    | 7  | 0.00134844 | 0.2428435  | 0.275461349 | 0.449397262 |
| cg21045385 | CYTSB;CY | 17 | 0.01033353 | 0.47838538 | 0.514628536 | 0.645054678 |
| cg05643545 | CYTSB;CY | 17 | 0.01980843 | 0.24367524 | 0.189177308 | 0.423201793 |
| cg17370412 | CYTSB;CY | 17 | 0.03615697 | 0.20596721 | 0.204665257 | 0.323806713 |
| cg20290367 | CYTSB;CY | 17 | 0.0103127  | 0.22730312 | 0.207215081 | 0.392055365 |
| cg09818912 | CYTSB;CY | 17 | 0.01539932 | 0.32277832 | 0.357339658 | 0.524750802 |
| cg17365725 | D2HGDH   | 2  | 0.00388546 | 0.51761743 | 0.491262262 | 0.642245627 |
| cg27351239 | DAAM2    | 6  | 0.00337568 | 0.13802604 | 0.152053576 | 0.252650298 |
| cg05609656 | DAAM2    | 6  | 0.00193169 | 0.33321809 | 0.452192262 | 0.602604593 |
| cg08465708 | DAB1     | 1  | 0.03657758 | 0.57398779 | 0.609472066 | 0.722198777 |
| cg14190522 | DAB2IP   | 9  | 0.00302211 | 0.11514724 | 0.13226934  | 0.272725322 |
| cg08906015 | DACT3    | 19 | 0.00243597 | 0.19413698 | 0.157527197 | 0.373832347 |
| cg06454084 | DACT3    | 19 | 0.00661882 | 0.27766288 | 0.287574703 | 0.512956871 |
| cg12472022 | DAGLA    | 11 | 0.00845805 | 0.14449775 | 0.133068338 | 0.246909792 |
| cg19633004 | DAP      | 5  | 0.00594191 | 0.21260547 | 0.208175764 | 0.390022641 |
| cg05473987 | DAP      | 5  | 0.00076471 | 0.30959435 | 0.402606393 | 0.55283537  |
| cg18801045 | DAP      | 5  | 0.00109472 | 0.20586813 | 0.259833079 | 0.497735475 |
| cg24754277 | DAPK1    | 9  | 0.00223531 | 0.19197954 | 0.232804387 | 0.348276851 |
| cg16447058 | DAPK2    | 15 | 0.00878866 | 0.22401666 | 0.194035486 | 0.345364678 |
| cg11775215 | DAPK2    | 15 | 0.01507708 | 0.44384491 | 0.506424885 | 0.609479306 |
| cg02872476 | DBNDD1   | 16 | 0.0100567  | 0.36828686 | 0.313563893 | 0.511011769 |
| cg26730025 | DCAKD;D  | 17 | 0.01320626 | 0.1150828  | 0.115115057 | 0.217554969 |
| cg16177647 | DCAKD;D  | 17 | 0.00132036 | 0.34259924 | 0.374654993 | 0.613673645 |
| cg12226735 | DCBLD2   | 3  | 0.00469934 | 0.49586509 | 0.480978979 | 0.637423375 |
| cg23173301 | DCHS1    | 11 | 0.00367708 | 0.33313836 | 0.306216809 | 0.491690006 |
| cg09605634 | DCLK1    | 13 | 0.00440148 | 0.17646206 | 0.150417886 | 0.307782807 |
| cg11325273 | DCLK1    | 13 | 0.01435007 | 0.17298868 | 0.224434463 | 0.352131431 |
| cg22806908 | DCP1A    | 3  | 0.0012281  | 0.36703745 | 0.392166673 | 0.646724588 |
| cg07039975 | DCTN1;D  | 2  | 0.0182655  | 0.31947507 | 0.311490956 | 0.440397791 |
| cg20202112 | DCTN1;D  | 2  | 0.00857669 | 0.29268419 | 0.275763709 | 0.415760052 |
| cg21238257 | DCUN1D2  | 13 | 0.00334886 | 0.67573244 | 0.703196495 | 0.816848218 |
| cg01145245 | DCUN1D3  | 16 | 0.00989055 | 0.1458617  | 0.113635857 | 0.248588262 |
| cg01820584 | DCUN1D4  | 4  | 0.00092643 | 0.27174402 | 0.369721147 | 0.644850388 |
| cg25095032 | DDAH2    | 6  | 0.00334886 | 0.27374086 | 0.239611487 | 0.379815426 |
| cg04074004 | DDAH2    | 6  | 0.00737637 | 0.31995881 | 0.321363932 | 0.44442713  |
| cg10771650 | DDR1     | 6  | 0.00297143 | 0.35587136 | 0.35235087  | 0.54482447  |
| cg19215110 | DDR1;DD  | 6  | 0.01748472 | 0.25804948 | 0.23987511  | 0.379893566 |

|            |          |    |            |            |             |             |
|------------|----------|----|------------|------------|-------------|-------------|
| cg16707952 | DDR1;DD  | 6  | 0.00335022 | 0.44056608 | 0.497142751 | 0.634779233 |
| cg12768993 | DDX10    | 11 | 0.00783744 | 0.66119304 | 0.646014432 | 0.782259869 |
| cg07194374 | DDX24    | 14 | 0.00132036 | 0.40881473 | 0.462581589 | 0.641754288 |
| cg12499311 | DDX46    | 5  | 0.03931081 | 0.1674144  | 0.135440355 | 0.275774837 |
| cg13569700 | DEAF1    | 11 | 0.00367963 | 0.68229042 | 0.672017033 | 0.789853302 |
| cg09375756 | DEAF1    | 11 | 0.00369903 | 0.39946234 | 0.375262027 | 0.595887531 |
| cg21156386 | DEAF1    | 11 | 0.00329066 | 0.25604775 | 0.302552282 | 0.464528781 |
| cg26894841 | DEF8;DEF | 16 | 0.03533938 | 0.41366376 | 0.40850249  | 0.523228503 |
| cg14798653 | DENND1C  | 19 | 0.00466622 | 0.28661886 | 0.271721394 | 0.395437266 |
| cg08379738 | DENND1C  | 19 | 0.02232449 | 0.33201591 | 0.300701675 | 0.468471949 |
| cg08319291 | DENND2/  | 7  | 0.00085355 | 0.59287188 | 0.60075195  | 0.702839334 |
| cg07580128 | DENND3   | 8  | 0.00184462 | 0.63640095 | 0.681097981 | 0.798815508 |
| cg21442881 | DENND3   | 8  | 0.00065949 | 0.21287069 | 0.351217216 | 0.537794669 |
| cg02919712 | DEPDC6   | 8  | 0.01059488 | 0.29242704 | 0.340261017 | 0.466236617 |
| cg12744321 | DFFB     | 1  | 0.01653406 | 0.43297309 | 0.41643697  | 0.538195566 |
| cg17790129 | DFNA5;DI | 7  | 0.00798815 | 0.16438626 | 0.141659445 | 0.299361104 |
| cg25577212 | DFNA5;DI | 7  | 0.00655853 | 0.16619857 | 0.160132705 | 0.292578948 |
| cg13826055 | DFNB31;I | 9  | 0.00152405 | 0.44472118 | 0.458419175 | 0.736589891 |
| cg23224619 | DGKD;DG  | 2  | 0.02205285 | 0.34503295 | 0.351303715 | 0.482371161 |
| cg25107522 | DGKD;DG  | 2  | 0.00620309 | 0.16655459 | 0.127273948 | 0.273319467 |
| cg08051105 | DGKD;DG  | 2  | 0.00290605 | 0.46383916 | 0.473188241 | 0.579780017 |
| cg15815084 | DGKE     | 17 | 0.00138788 | 0.20797433 | 0.275189837 | 0.399415069 |
| cg22718636 | DGKQ     | 4  | 0.03515143 | 0.1866143  | 0.185840418 | 0.288005405 |
| cg10523319 | DHRS3    | 1  | 0.00076471 | 0.57015005 | 0.634998757 | 0.786236161 |
| cg16432031 | DHRS3    | 1  | 0.00485228 | 0.47433594 | 0.50127345  | 0.610456441 |
| cg00352872 | DHRS7C   | 17 | 0.00758031 | 0.15781421 | 0.154666724 | 0.282177084 |
| cg14777519 | DHX30;DI | 3  | 0.00552473 | 0.3219801  | 0.314924573 | 0.474776929 |
| cg20592691 | DIAPH3;E | 13 | 0.02833129 | 0.44295771 | 0.425027964 | 0.601776073 |
| cg23899649 | DICER1;D | 14 | 0.00779924 | 0.63399621 | 0.61885261  | 0.765883363 |
| cg10948630 | DICER1;D | 14 | 0.00192049 | 0.59459332 | 0.653954789 | 0.801618489 |
| cg23488578 | DICER1;D | 14 | 0.00614688 | 0.15828085 | 0.145593354 | 0.260672086 |
| cg13387972 | DIP2C    | 10 | 0.00263125 | 0.53026159 | 0.535773593 | 0.651284888 |
| cg17242812 | DIP2C    | 10 | 0.02823023 | 0.65935981 | 0.594130693 | 0.824559144 |
| cg25301103 | DIP2C    | 10 | 0.0012838  | 0.4888182  | 0.60408024  | 0.813490187 |
| cg11423998 | DIP2C    | 10 | 0.00097509 | 0.50918532 | 0.594489491 | 0.780931381 |
| cg09782637 | DIP2C    | 10 | 0.00227742 | 0.43639176 | 0.521357628 | 0.729256294 |
| cg13477178 | DIP2C    | 10 | 0.0012504  | 0.16477255 | 0.203040301 | 0.366621301 |
| cg20251943 | DIP2C    | 10 | 0.00168532 | 0.24974176 | 0.285560142 | 0.428568211 |
| cg15584954 | DIP2C    | 10 | 0.01373528 | 0.53137363 | 0.565362502 | 0.674279194 |
| cg04806237 | DIP2C    | 10 | 0.00341932 | 0.62739918 | 0.701357609 | 0.860837383 |
| cg08306029 | DIP2C    | 10 | 0.00117894 | 0.57385464 | 0.638815593 | 0.771287215 |
| cg05005968 | DIP2C    | 10 | 0.00726745 | 0.13027951 | 0.10985874  | 0.251395737 |
| cg20517784 | DIP2C    | 10 | 0.00224923 | 0.49633925 | 0.480662804 | 0.716623346 |
| cg17608529 | DIP2C    | 10 | 0.00567752 | 0.3649349  | 0.315462136 | 0.493274401 |
| cg26406407 | DIP2C    | 10 | 0.00722201 | 0.45714615 | 0.465389313 | 0.573062351 |
| cg04248461 | DIP2C    | 10 | 0.00314361 | 0.21050461 | 0.182939712 | 0.313997962 |



|            |          |    |            |            |             |             |
|------------|----------|----|------------|------------|-------------|-------------|
| cg24461627 | DIP2C    | 10 | 0.036552   | 0.39607971 | 0.411603922 | 0.540272292 |
| cg00590260 | DIP2C    | 10 | 0.00488333 | 0.22092949 | 0.189141952 | 0.348734412 |
| cg12531838 | DIP2C    | 10 | 0.00953692 | 0.19090346 | 0.169706021 | 0.307762115 |
| cg17905091 | DIP2C    | 10 | 0.00844494 | 0.41173964 | 0.446150842 | 0.613821305 |
| cg06492521 | DIP2C    | 10 | 0.0231425  | 0.43692249 | 0.42345554  | 0.588883514 |
| cg17861458 | DIP2C    | 10 | 0.00446647 | 0.50259361 | 0.521011119 | 0.644105084 |
| cg26511507 | DIP2C    | 10 | 0.00176085 | 0.14403839 | 0.158775313 | 0.307552658 |
| cg06156195 | DIP2C    | 10 | 0.00319723 | 0.54450334 | 0.604143402 | 0.719611258 |
| cg10441401 | DIP2C    | 10 | 0.00225052 | 0.21905477 | 0.22599385  | 0.385400778 |
| cg11081275 | DIP2C    | 10 | 0.00555638 | 0.27333866 | 0.236077484 | 0.41872938  |
| cg09961254 | DIP2C    | 10 | 0.00852838 | 0.27253103 | 0.249591515 | 0.412590265 |
| cg27159421 | DIP2C    | 10 | 0.00247655 | 0.54835363 | 0.550330375 | 0.708438791 |
| cg26782150 | DIP2C    | 10 | 0.01177946 | 0.24905776 | 0.199621536 | 0.397786148 |
| cg08784934 | DIP2C    | 10 | 0.00103895 | 0.42894028 | 0.415214002 | 0.589873451 |
| cg11468148 | DIP2C    | 10 | 0.00714351 | 0.26786443 | 0.266595351 | 0.404926643 |
| cg08079763 | DIP2C    | 10 | 0.00065949 | 0.20450994 | 0.270471372 | 0.389136055 |
| cg04720116 | DIP2C    | 10 | 0.00337719 | 0.45526937 | 0.486945171 | 0.663813612 |
| cg25297146 | DIP2C    | 10 | 0.00074409 | 0.75863202 | 0.796543821 | 0.901099183 |
| cg10494981 | DIP2C    | 10 | 0.00838577 | 0.63230088 | 0.696629322 | 0.796855529 |
| cg15713378 | DIP2C;C1 | 10 | 0.00233734 | 0.45060537 | 0.453690117 | 0.598698984 |
| cg13660126 | DIP2C;C1 | 10 | 0.01847369 | 0.48539659 | 0.48231296  | 0.624489605 |
| cg15516835 | DIP2C;C1 | 10 | 0.00579556 | 0.17057806 | 0.151804677 | 0.288299426 |
| cg17198320 | DIP2C;C1 | 10 | 0.02630407 | 0.34199329 | 0.373431382 | 0.516808124 |
| cg07469445 | DIP2C;C1 | 10 | 0.02002229 | 0.20026534 | 0.21531231  | 0.339225421 |
| cg16682227 | DIRAS3   | 1  | 0.00664361 | 0.36120055 | 0.330019038 | 0.519835929 |
| cg03803789 | DIXDC1;D | 11 | 0.00538904 | 0.21986211 | 0.158773045 | 0.357322816 |
| cg18962750 | DIXDC1;D | 11 | 0.00213077 | 0.56166623 | 0.599134747 | 0.724930229 |
| cg26148020 | DLC1     | 8  | 0.02212773 | 0.22054979 | 0.194128343 | 0.36400123  |
| cg16749785 | DLC1;DLC | 8  | 0.01443228 | 0.47778702 | 0.529144746 | 0.668878883 |
| cg20607577 | DLC1;DLC | 8  | 0.03898484 | 0.41906895 | 0.449347266 | 0.578237512 |
| cg17989952 | DLC1;DLC | 8  | 0.00796638 | 0.47667885 | 0.429794617 | 0.644867759 |
| cg20733077 | DLEU2    | 13 | 0.04190693 | 0.37833329 | 0.417897508 | 0.543779479 |
| cg01404873 | DLEU2    | 13 | 0.04172015 | 0.34933795 | 0.400197686 | 0.519747035 |
| cg13489576 | DLG1;DLC | 3  | 0.00449495 | 0.61894662 | 0.638510577 | 0.750197453 |
| cg24182581 | DLG2;DLC | 11 | 0.00433996 | 0.32086438 | 0.36828333  | 0.526569202 |
| cg27328839 | DLG5     | 10 | 0.00263491 | 0.61276183 | 0.642563291 | 0.763670657 |
| cg23042540 | DLGAP2   | 8  | 0.02047468 | 0.28154795 | 0.227901947 | 0.38589503  |
| cg06432036 | DLL1     | 6  | 0.00297078 | 0.59067675 | 0.621718017 | 0.726779463 |
| cg14157570 | DLL4     | 15 | 0.00390603 | 0.21799201 | 0.189129435 | 0.416482206 |
| cg00204249 | DNAH17   | 17 | 0.0024796  | 0.44372366 | 0.44531759  | 0.625787234 |
| cg05361750 | DNAH17   | 17 | 0.00644172 | 0.66269363 | 0.65472295  | 0.771183962 |
| cg10161638 | DNAJB6   | 7  | 0.00152273 | 0.32816639 | 0.34847944  | 0.499669695 |
| cg16081609 | DNAJC1   | 10 | 0.03174689 | 0.43332891 | 0.430018177 | 0.545681622 |
| cg26544725 | DNAJC1   | 10 | 0.02888438 | 0.7505124  | 0.727818198 | 0.852410473 |
| cg25700533 | DNAJC17  | 15 | 0.00070678 | 0.0746193  | 0.095908638 | 0.254083547 |
| cg11174089 | DNAJC3   | 13 | 0.00384078 | 0.54634841 | 0.579648827 | 0.752344258 |

|            |          |    |            |            |             |             |
|------------|----------|----|------------|------------|-------------|-------------|
| cg09764984 | DNASE1   | 16 | 0.00367708 | 0.18503276 | 0.169594979 | 0.373521477 |
| cg27552378 | DNASE1   | 16 | 0.00248015 | 0.24400335 | 0.233296927 | 0.382191017 |
| cg23009818 | DNMT3A;  | 2  | 0.001223   | 0.20286479 | 0.236334925 | 0.339120425 |
| cg20702417 | DNMT3A;  | 2  | 0.00173053 | 0.49903571 | 0.522503134 | 0.624211092 |
| cg06748978 | DNMT3A;  | 2  | 0.00219764 | 0.31674545 | 0.351171366 | 0.523124031 |
| cg27482168 | DNPEP    | 2  | 0.03288793 | 0.36496765 | 0.355651441 | 0.476287065 |
| cg26717418 | DOCK1    | 10 | 0.00804549 | 0.47191312 | 0.443669627 | 0.584856616 |
| cg02262162 | DOCK3    | 3  | 0.01748472 | 0.65883735 | 0.593987201 | 0.799777489 |
| cg05046083 | DOCK4    | 7  | 0.00620216 | 0.2328488  | 0.302568886 | 0.429268226 |
| cg16797901 | DOCK4    | 7  | 0.00901377 | 0.16218202 | 0.142036109 | 0.271932602 |
| cg11800635 | DOK1     | 2  | 0.00077739 | 0.16762431 | 0.236444707 | 0.337581188 |
| cg07280936 | DOK7;DO  | 4  | 0.00491697 | 0.19533998 | 0.178423478 | 0.316220613 |
| cg21725158 | DOT1L    | 19 | 0.00679946 | 0.43462966 | 0.419040127 | 0.563125241 |
| cg14293102 | DOT1L    | 19 | 0.0007901  | 0.52872404 | 0.577232828 | 0.757674292 |
| cg09350880 | DPF3     | 14 | 0.01173837 | 0.3041515  | 0.275615263 | 0.408673777 |
| cg01901381 | DPF3     | 14 | 0.00103447 | 0.44797906 | 0.49127242  | 0.624300878 |
| cg06776201 | DPF3     | 14 | 0.03327853 | 0.24741386 | 0.232144473 | 0.365953828 |
| cg23057232 | DPYD     | 1  | 0.01083301 | 0.20980129 | 0.230482604 | 0.393432918 |
| cg16649728 | DRAP1;C1 | 11 | 0.00349176 | 0.28672318 | 0.27726874  | 0.397764768 |
| cg14603539 | DSCAM    | 21 | 0.00591291 | 0.29854688 | 0.297893028 | 0.427158348 |
| cg22778797 | DSCR8;D5 | 21 | 0.00543797 | 0.6242728  | 0.628607611 | 0.729230968 |
| cg12561125 | DTX3;GEF | 12 | 0.01580038 | 0.33854448 | 0.329748695 | 0.458759069 |
| cg03913136 | DUSP14   | 17 | 0.01144141 | 0.73743837 | 0.732392868 | 0.860404406 |
| cg14689456 | DYSF;DYS | 2  | 0.00595714 | 0.53155818 | 0.576159273 | 0.698144251 |
| cg01171786 | DYSF;DYS | 2  | 0.04152323 | 0.30800034 | 0.289381792 | 0.445733713 |
| cg12245706 | DYSF;DYS | 2  | 0.00077468 | 0.26413114 | 0.338194604 | 0.591180372 |
| cg14196395 | DYSF;DYS | 2  | 0.00132175 | 0.27829333 | 0.371516551 | 0.574447821 |
| cg22480875 | E2F7     | 12 | 0.00358002 | 0.57713453 | 0.617985163 | 0.734846806 |
| cg09172244 | EBF1     | 5  | 0.00247734 | 0.30194028 | 0.325593847 | 0.545794077 |
| cg11690724 | EBF1     | 5  | 0.00065949 | 0.41900127 | 0.56525764  | 0.719251137 |
| cg27417526 | EBF3     | 10 | 0.00735709 | 0.59826264 | 0.551212681 | 0.715732024 |
| cg03774288 | EBF3     | 10 | 0.00574743 | 0.32391745 | 0.30916034  | 0.486154949 |
| cg20161275 | EBF3     | 10 | 0.01590217 | 0.30809237 | 0.254548894 | 0.431609379 |
| cg16093296 | EBF3     | 10 | 0.00356189 | 0.61269355 | 0.702655508 | 0.830390582 |
| cg23250262 | EBF3     | 10 | 0.02833301 | 0.26499661 | 0.257599531 | 0.403799897 |
| cg06344553 | EBF3     | 10 | 0.02414194 | 0.44910179 | 0.47283187  | 0.620171292 |
| cg11834658 | ECE1;ECE | 1  | 0.00141131 | 0.48323097 | 0.50294609  | 0.639546025 |
| cg13562122 | ECE1;ECE | 1  | 0.00405794 | 0.41009503 | 0.353152728 | 0.535784293 |
| cg13138089 | ECEL1P2  | 2  | 0.01155848 | 0.42866742 | 0.407064003 | 0.532090655 |
| cg24767131 | ECEL1P2  | 2  | 0.00624349 | 0.32738604 | 0.287918188 | 0.429627035 |
| cg21221557 | EDIL3    | 5  | 0.00279455 | 0.5932348  | 0.536986888 | 0.743271602 |
| cg16306043 | EDIL3    | 5  | 0.00917376 | 0.22263546 | 0.22593078  | 0.391974135 |
| cg05423018 | EEPD1    | 7  | 0.00084118 | 0.24180284 | 0.257235804 | 0.386627289 |
| cg18454133 | EF5;EF5  | 14 | 0.02247384 | 0.27118409 | 0.224389969 | 0.398907969 |
| cg16681436 | EGFL8    | 6  | 0.00109472 | 0.19193016 | 0.197733589 | 0.341627701 |
| cg00359087 | EGFL8    | 6  | 0.00258141 | 0.45412953 | 0.422962806 | 0.568168194 |

|            |           |    |            |            |             |             |
|------------|-----------|----|------------|------------|-------------|-------------|
| cg06154903 | EHD1      | 11 | 0.00302287 | 0.22921905 | 0.26957604  | 0.382872677 |
| cg23121787 | EHD4      | 15 | 0.01336583 | 0.39432277 | 0.373435668 | 0.520855105 |
| cg21195984 | EHMT1     | 9  | 0.00296383 | 0.33926618 | 0.263954222 | 0.452306414 |
| cg14064959 | EHMT1     | 9  | 0.00229687 | 0.52081355 | 0.489443929 | 0.711106755 |
| cg19268388 | EHMT2;E   | 6  | 0.03585699 | 0.73775941 | 0.738016023 | 0.841672233 |
| cg24493649 | EHMT2;S   | 6  | 0.01162689 | 0.22611525 | 0.20226952  | 0.373058245 |
| cg19770715 | EHMT2;S   | 6  | 0.00073118 | 0.25911054 | 0.296483087 | 0.480470166 |
| cg19539385 | EIF2AK1;f | 7  | 0.01749142 | 0.22362705 | 0.238005897 | 0.360512351 |
| cg25922279 | EIF2C2;E  | 8  | 0.0008696  | 0.48628425 | 0.480528596 | 0.667039647 |
| cg24251448 | EIF2C2;E  | 8  | 0.00113577 | 0.56101064 | 0.552431979 | 0.740481071 |
| cg03172341 | EIF2C2;E  | 8  | 0.00126466 | 0.60227813 | 0.640469815 | 0.750716352 |
| cg13582226 | EIF2C2;E  | 8  | 0.00079224 | 0.4698037  | 0.498543112 | 0.644904904 |
| cg02911270 | EIF2C2;E  | 8  | 0.0107931  | 0.52603802 | 0.507145209 | 0.651743305 |
| cg15936375 | EIF2C2;E  | 8  | 0.00120369 | 0.5028474  | 0.478649157 | 0.619613906 |
| cg21301240 | EIF3H     | 8  | 0.00997527 | 0.56289236 | 0.525024734 | 0.708741773 |
| cg17887364 | EIF4EBP1  | 8  | 0.00521564 | 0.2437122  | 0.226327841 | 0.430178158 |
| cg17868307 | EIF4H;E   | 7  | 0.00232775 | 0.47381864 | 0.560017587 | 0.677924599 |
| cg18429196 | EIF4H;E   | 7  | 0.0034485  | 0.37924594 | 0.389944032 | 0.546929955 |
| cg12691679 | ELF1      | 13 | 0.00240097 | 0.32366048 | 0.418810137 | 0.541290803 |
| cg03940407 | ELF2      | 4  | 0.01698967 | 0.43635191 | 0.472467695 | 0.638802601 |
| cg05653018 | ELF3;E    | 1  | 0.00288962 | 0.13150955 | 0.110678085 | 0.239149167 |
| cg16986578 | ELF3;E    | 1  | 0.00295889 | 0.15550822 | 0.171250294 | 0.301562678 |
| cg07897871 | ELF3;E    | 1  | 0.00079224 | 0.45630565 | 0.498352401 | 0.706092931 |
| cg02076020 | ELF3;E    | 1  | 0.00120195 | 0.27318857 | 0.314887429 | 0.500566345 |
| cg26328757 | ELF3;E    | 1  | 0.0016378  | 0.44491595 | 0.486289428 | 0.628513129 |
| cg12967164 | ELFN1     | 7  | 0.0047737  | 0.29255997 | 0.306501335 | 0.48376761  |
| cg26287309 | ELFN2     | 22 | 0.00316916 | 0.37767945 | 0.378617858 | 0.485003001 |
| cg08721338 | ELMO3     | 16 | 0.01405386 | 0.23495305 | 0.235856199 | 0.367727894 |
| cg09777237 | ELN;E     | 7  | 0.00513872 | 0.47789724 | 0.479781453 | 0.629303107 |
| cg15983182 | ELN;E     | 7  | 0.00343258 | 0.14611847 | 0.119723413 | 0.271947881 |
| cg25729687 | ELN;E     | 7  | 0.00725225 | 0.13727785 | 0.128838986 | 0.287212386 |
| cg17363943 | ELOVL6;E  | 4  | 0.01025339 | 0.23486205 | 0.206752695 | 0.372976772 |
| cg13352306 | EML3;R    | 11 | 0.00160583 | 0.27208989 | 0.264349465 | 0.428544044 |
| cg14055970 | ENG;E     | 9  | 0.01026108 | 0.46854496 | 0.499223844 | 0.6488223   |
| cg26938599 | ENKUR     | 10 | 0.02025944 | 0.31019719 | 0.38136868  | 0.482270761 |
| cg13777984 | ENOX1;E   | 13 | 0.00359691 | 0.15505146 | 0.174568159 | 0.372147601 |
| cg00049892 | ENPP1     | 6  | 0.01052586 | 0.40923572 | 0.398613096 | 0.604372688 |
| cg18796704 | ENPP1     | 6  | 0.0084821  | 0.16075901 | 0.137232605 | 0.282014098 |
| cg19270309 | ENPP7     | 17 | 0.00112915 | 0.24156687 | 0.294179413 | 0.413782496 |
| cg02148800 | EP400     | 12 | 0.00485228 | 0.4458515  | 0.479304736 | 0.585332862 |
| cg05629774 | EP400     | 12 | 0.00851187 | 0.46424085 | 0.463638928 | 0.595001257 |
| cg09075307 | EP400     | 12 | 0.00317466 | 0.64650417 | 0.646141739 | 0.75034233  |
| cg27007356 | EP400     | 12 | 0.0013706  | 0.56569535 | 0.585367912 | 0.700706032 |
| cg12608132 | EPAS1     | 2  | 0.00318268 | 0.28005568 | 0.248465608 | 0.396549227 |
| cg13997788 | EPAS1     | 2  | 0.00453882 | 0.32669539 | 0.298905516 | 0.452121182 |
| cg10507988 | EPAS1     | 2  | 0.02530958 | 0.43991323 | 0.442774212 | 0.550650445 |

|            |           |    |            |            |             |             |
|------------|-----------|----|------------|------------|-------------|-------------|
| cg22423984 | EPB41L1   | 20 | 0.01751915 | 0.18668305 | 0.138863266 | 0.287663674 |
| cg14090400 | EPB41L3   | 18 | 0.00262388 | 0.57892633 | 0.637593678 | 0.797017511 |
| cg23205365 | EPB41L5   | 2  | 0.00556434 | 0.2030137  | 0.150382111 | 0.33139034  |
| cg16678564 | EPB49;EP  | 8  | 0.00095459 | 0.39996769 | 0.398759676 | 0.572415277 |
| cg16448847 | EPHB1     | 3  | 0.00344958 | 0.18472792 | 0.212305863 | 0.333442679 |
| cg02974898 | EPHB2;EF  | 1  | 0.00546217 | 0.14361959 | 0.111620633 | 0.277242392 |
| cg18156963 | EPHB2;EF  | 1  | 0.03515606 | 0.24041064 | 0.211959233 | 0.375945048 |
| cg13694876 | EPHB3     | 3  | 0.00359753 | 0.41907234 | 0.467238202 | 0.618302541 |
| cg20438472 | EPHB3     | 3  | 0.00405622 | 0.60708836 | 0.608426386 | 0.716840423 |
| cg15334250 | EPHB3     | 3  | 0.01006689 | 0.33918855 | 0.388006359 | 0.506152664 |
| cg22493616 | EPHB4     | 7  | 0.00411612 | 0.48539637 | 0.464505595 | 0.588322242 |
| cg22303758 | EPHX2     | 8  | 0.0033048  | 0.26642508 | 0.353705369 | 0.486401339 |
| cg17742418 | EPN2;EPN  | 17 | 0.00152023 | 0.6687704  | 0.657247727 | 0.792827851 |
| cg14173476 | EPN2;EPN  | 17 | 0.00186737 | 0.25071513 | 0.24313733  | 0.423663164 |
| cg25673598 | EPN2;EPN  | 17 | 0.00075989 | 0.12023639 | 0.157424745 | 0.290038162 |
| cg11414610 | EPS15L1   | 19 | 0.00176085 | 0.32268283 | 0.42375856  | 0.561898057 |
| cg03332546 | EPS15L1   | 19 | 0.00123203 | 0.09525794 | 0.113553374 | 0.252861546 |
| cg16597993 | EPS15L1   | 19 | 0.00190848 | 0.22046217 | 0.215630568 | 0.3659165   |
| cg17649115 | EPS8L2    | 11 | 0.00183809 | 0.76161169 | 0.78044218  | 0.882201846 |
| cg04587886 | EPS8L2    | 11 | 0.00116732 | 0.59968524 | 0.596351136 | 0.715171315 |
| cg06378010 | ERC1;ERC  | 12 | 0.01502763 | 0.22833921 | 0.230374662 | 0.362222    |
| cg21578987 | ERG;ERG   | 21 | 0.01896129 | 0.23230868 | 0.250371055 | 0.413530711 |
| cg14536431 | ERG;ERG   | 21 | 0.00866121 | 0.1357675  | 0.110203976 | 0.260479854 |
| cg15833565 | ERI3      | 1  | 0.00144775 | 0.19667403 | 0.203714745 | 0.35821208  |
| cg02650323 | ERLIN2;EI | 8  | 0.01860545 | 0.20985545 | 0.2041499   | 0.330243904 |
| cg06193232 | ERN1      | 17 | 0.00327469 | 0.21738805 | 0.217397059 | 0.393740973 |
| cg15676711 | ERRFI1    | 1  | 0.00524148 | 0.41587042 | 0.458065636 | 0.57324352  |
| cg06159484 | ERRFI1    | 1  | 0.00822746 | 0.39756473 | 0.367000199 | 0.549662532 |
| cg25338972 | ESR1      | 6  | 0.01417701 | 0.14833967 | 0.105863917 | 0.251159138 |
| cg07455133 | ESR1;ESR  | 6  | 0.01546656 | 0.21071595 | 0.195259946 | 0.340647757 |
| cg00944421 | ESRP2     | 16 | 0.01487618 | 0.23309211 | 0.217961553 | 0.360079981 |
| cg05212892 | ESYT2     | 7  | 0.00334886 | 0.35202088 | 0.309717422 | 0.548298379 |
| cg16354756 | ETV3;CYC  | 1  | 0.008246   | 0.50528885 | 0.518878677 | 0.628003701 |
| cg03609488 | ETV6      | 12 | 0.00258141 | 0.1145828  | 0.114562099 | 0.215693847 |
| cg26889659 | EXOC2     | 6  | 0.00810421 | 0.20371682 | 0.169182616 | 0.326752644 |
| cg08460580 | EXOC2     | 6  | 0.00878866 | 0.63002266 | 0.609228951 | 0.730821328 |
| cg00449767 | EXOC3L2   | 19 | 0.00542561 | 0.29501282 | 0.288431755 | 0.403845403 |
| cg01565314 | EXOC3L2   | 19 | 0.00113574 | 0.1815062  | 0.178838059 | 0.286335597 |
| cg09450024 | EXOC3L2   | 19 | 0.01114245 | 0.18715235 | 0.163082638 | 0.306202739 |
| cg08882547 | EXOC3L2   | 19 | 0.00566397 | 0.21374254 | 0.178773246 | 0.325001752 |
| cg13654884 | EXOC6     | 10 | 0.00233298 | 0.54582131 | 0.598684953 | 0.706137943 |
| cg13314863 | EXOC6;EX  | 10 | 0.00514    | 0.5787022  | 0.601435455 | 0.718645402 |
| cg24892992 | EXT1      | 8  | 0.00140256 | 0.40481521 | 0.472401889 | 0.645376715 |
| cg22271457 | EXT1      | 8  | 0.00075963 | 0.59799563 | 0.637467846 | 0.812889845 |
| cg03599855 | EXT1      | 8  | 0.0169634  | 0.22490095 | 0.259558538 | 0.383208306 |
| cg04395788 | EXT1      | 8  | 0.00523471 | 0.30109784 | 0.388911322 | 0.507394602 |

|            |          |    |            |            |             |             |
|------------|----------|----|------------|------------|-------------|-------------|
| cg00332126 | EXT2;EXT | 11 | 0.02944061 | 0.26575105 | 0.232199907 | 0.372418772 |
| cg07551677 | EXTL3    | 8  | 0.00168532 | 0.62261161 | 0.675354383 | 0.811693896 |
| cg00550493 | EYS      | 6  | 0.01164166 | 0.21173293 | 0.182088074 | 0.342603733 |
| cg18868540 | F2       | 11 | 0.00294138 | 0.32857307 | 0.348015358 | 0.536570571 |
| cg26667735 | FAAH     | 1  | 0.00065949 | 0.54504911 | 0.647730929 | 0.777249942 |
| cg07168328 | FAAH     | 1  | 0.00196477 | 0.28213078 | 0.299901475 | 0.419018343 |
| cg05009047 | FAM100A  | 16 | 0.01154548 | 0.62580573 | 0.662601893 | 0.765441334 |
| cg05712979 | FAM101A  | 12 | 0.00097618 | 0.46402588 | 0.508158003 | 0.621751782 |
| cg18672389 | FAM101A  | 12 | 0.00148491 | 0.28943683 | 0.314280591 | 0.570134002 |
| cg14273093 | FAM101A  | 12 | 0.00248044 | 0.24911783 | 0.293006797 | 0.47769815  |
| cg13761284 | FAM102A  | 9  | 0.00158181 | 0.36073755 | 0.369337808 | 0.506505723 |
| cg13692655 | FAM102A  | 9  | 0.00403008 | 0.34014629 | 0.342319675 | 0.467048603 |
| cg12354318 | FAM107E  | 10 | 0.00521564 | 0.25357701 | 0.252452033 | 0.375126424 |
| cg08608727 | FAM109A  | 12 | 0.00065949 | 0.51280017 | 0.567846275 | 0.674322591 |
| cg01285862 | FAM114A  | 5  | 0.02289835 | 0.16168282 | 0.153981671 | 0.277622795 |
| cg21184699 | FAM120A  | 9  | 0.00095989 | 0.65539741 | 0.670168612 | 0.813889018 |
| cg06381463 | FAM125E  | 9  | 0.00405622 | 0.45786831 | 0.410393732 | 0.640561952 |
| cg11970163 | FAM129A  | 1  | 0.02822075 | 0.47205387 | 0.426901748 | 0.580640391 |
| cg25182523 | FAM129A  | 1  | 0.00075421 | 0.28195328 | 0.352231633 | 0.483169312 |
| cg06712722 | FAM129E  | 9  | 0.00488333 | 0.43384006 | 0.467999032 | 0.593954111 |
| cg14408339 | FAM129E  | 9  | 0.00184545 | 0.24394679 | 0.248408691 | 0.350798676 |
| cg21169267 | FAM129E  | 9  | 0.00672923 | 0.41557513 | 0.366497975 | 0.524685171 |
| cg17156402 | FAM131C  | 1  | 0.00077454 | 0.50035037 | 0.531334546 | 0.675000668 |
| cg13782092 | FAM13A;  | 4  | 0.0075862  | 0.55977831 | 0.50069908  | 0.688977354 |
| cg04860977 | FAM155A  | 13 | 0.00287555 | 0.31807879 | 0.355170165 | 0.584299405 |
| cg03520938 | FAM160E  | 8  | 0.00272772 | 0.23898138 | 0.241648811 | 0.351239924 |
| cg06551905 | FAM167A  | 8  | 0.00802316 | 0.14121831 | 0.13285282  | 0.243124077 |
| cg16495818 | FAM168A  | 11 | 0.00751061 | 0.19593099 | 0.227806936 | 0.332932999 |
| cg11452043 | FAM168E  | 2  | 0.00216893 | 0.46893816 | 0.402550204 | 0.593194032 |
| cg01245667 | FAM169E  | 15 | 0.02346046 | 0.32561449 | 0.267486038 | 0.443710818 |
| cg12771178 | FAM170E  | 10 | 0.00211366 | 0.18305291 | 0.166105537 | 0.286564537 |
| cg16512990 | FAM170E  | 10 | 0.01068625 | 0.40919673 | 0.41823701  | 0.539030098 |
| cg27406618 | FAM170E  | 10 | 0.00327239 | 0.24318453 | 0.244772941 | 0.397089275 |
| cg01948367 | FAM172A  | 5  | 0.0266726  | 0.62479095 | 0.626504846 | 0.729539707 |
| cg22810403 | FAM176E  | 1  | 0.00653182 | 0.68192119 | 0.683759514 | 0.802244744 |
| cg18665384 | FAM177E  | 1  | 0.00967401 | 0.31537408 | 0.292332578 | 0.45595163  |
| cg26108017 | FAM178E  | 2  | 0.00245827 | 0.4504408  | 0.445537399 | 0.558609051 |
| cg05368724 | FAM178E  | 2  | 0.00092758 | 0.33924749 | 0.350512842 | 0.514810403 |
| cg05557262 | FAM180A  | 7  | 0.00917562 | 0.63896027 | 0.649110817 | 0.758255499 |
| cg00005619 | FAM180E  | 11 | 0.00111524 | 0.23630761 | 0.254118952 | 0.410204979 |
| cg24657419 | FAM184A  | 6  | 0.0048909  | 0.60019885 | 0.567565373 | 0.701189994 |
| cg03309770 | FAM18A;  | 16 | 0.00405622 | 0.15322671 | 0.150191751 | 0.256384699 |
| cg26952618 | FAM18A;  | 16 | 0.00702677 | 0.1513523  | 0.152195299 | 0.263057741 |
| cg12801917 | FAM18B2  | 17 | 0.00233298 | 0.25489605 | 0.247891794 | 0.38436045  |
| cg25790133 | FAM193A  | 4  | 0.00432931 | 0.32022207 | 0.276448679 | 0.542642719 |
| cg05083414 | FAM193A  | 4  | 0.00524121 | 0.26959737 | 0.228330729 | 0.372729042 |

|            |           |    |            |            |             |             |
|------------|-----------|----|------------|------------|-------------|-------------|
| cg05949640 | FAM193A   | 4  | 0.00735604 | 0.33473534 | 0.302246812 | 0.487817963 |
| cg26981170 | FAM193A   | 4  | 0.02248239 | 0.29072947 | 0.244982212 | 0.398081337 |
| cg20163033 | FAM193A   | 4  | 0.00168532 | 0.65278754 | 0.617873536 | 0.762741663 |
| cg05883695 | FAM198A   | 3  | 0.00271218 | 0.19516549 | 0.215397096 | 0.319674752 |
| cg16716189 | FAM19A3   | 1  | 0.00610999 | 0.32763507 | 0.307120544 | 0.43079441  |
| cg19579080 | FAM20A    | 17 | 0.00500442 | 0.18859177 | 0.223948427 | 0.371638996 |
| cg05031931 | FAM20C    | 7  | 0.00758361 | 0.16841662 | 0.159130942 | 0.305508967 |
| cg00308560 | FAM20C    | 7  | 0.00169362 | 0.24020398 | 0.205094697 | 0.348698678 |
| cg23782833 | FAM20C    | 7  | 0.00213077 | 0.24660386 | 0.276615393 | 0.430486335 |
| cg18234533 | FAM20C    | 7  | 0.0018139  | 0.34628942 | 0.382472854 | 0.524852811 |
| cg19619414 | FAM20C    | 7  | 0.0012026  | 0.15593465 | 0.157199661 | 0.261955553 |
| cg12748511 | FAM20C    | 7  | 0.00568798 | 0.17127432 | 0.140622306 | 0.283483391 |
| cg25929664 | FAM20C    | 7  | 0.00160273 | 0.18501268 | 0.198479159 | 0.39789555  |
| cg27640234 | FAM20C    | 7  | 0.00286125 | 0.48903785 | 0.473818762 | 0.644925947 |
| cg11200568 | FAM20C    | 7  | 0.00735709 | 0.31217708 | 0.2716649   | 0.41547243  |
| cg19476741 | FAM20C    | 7  | 0.00232775 | 0.18778747 | 0.189127659 | 0.330772736 |
| cg08616667 | FAM20C    | 7  | 0.00209789 | 0.16530785 | 0.15288364  | 0.280804038 |
| cg04256674 | FAM20C    | 7  | 0.01891102 | 0.67494183 | 0.666363176 | 0.807716361 |
| cg24286414 | FAM20C    | 7  | 0.00130462 | 0.48333364 | 0.519455506 | 0.681937378 |
| cg08728302 | FAM20C    | 7  | 0.00185795 | 0.30310503 | 0.301340629 | 0.566906985 |
| cg24248680 | FAM24B    | 10 | 0.01638971 | 0.52824749 | 0.550909237 | 0.660011552 |
| cg15683166 | FAM24B    | 10 | 0.01580766 | 0.35883421 | 0.29407452  | 0.48369997  |
| cg06751612 | FAM38A    | 16 | 0.00330705 | 0.46444573 | 0.436144783 | 0.57716158  |
| cg06855137 | FAM38A    | 16 | 0.00090315 | 0.2214813  | 0.24950843  | 0.351546172 |
| cg27539806 | FAM38A    | 16 | 0.00142756 | 0.40504833 | 0.440829572 | 0.633330389 |
| cg16641055 | FAM38A    | 16 | 0.0035878  | 0.29401831 | 0.295879064 | 0.399487942 |
| cg00626702 | FAM53A    | 4  | 0.01842786 | 0.20766646 | 0.18235227  | 0.321606337 |
| cg26725552 | FAM53B    | 10 | 0.02382799 | 0.67939653 | 0.68255888  | 0.82876271  |
| cg19975346 | FAM53B    | 10 | 0.00065949 | 0.16614349 | 0.277683078 | 0.480968835 |
| cg23088510 | FAM53B    | 10 | 0.01416646 | 0.28254428 | 0.338069262 | 0.49961553  |
| cg00557402 | FAM55D;   | 11 | 0.00620216 | 0.42562158 | 0.505981235 | 0.629566712 |
| cg22223402 | FAM55D;   | 11 | 0.02985248 | 0.4248458  | 0.395971815 | 0.53053556  |
| cg01045946 | FAM63A;   | 1  | 0.0062271  | 0.43310375 | 0.430062596 | 0.553151541 |
| cg01872947 | FAM65A    | 16 | 0.00349009 | 0.20567111 | 0.208359093 | 0.351457423 |
| cg19619331 | FAM71F2   | 7  | 0.00841172 | 0.18331464 | 0.211408171 | 0.338397708 |
| cg22248750 | FAM82A1   | 2  | 0.01130304 | 0.23292651 | 0.156828999 | 0.355622567 |
| cg00846121 | FAM83E    | 19 | 0.00567904 | 0.23124402 | 0.208228322 | 0.358064043 |
| cg13791971 | FANCC     | 9  | 0.00283173 | 0.28157551 | 0.325848271 | 0.453112891 |
| cg17380943 | FARP1     | 13 | 0.00582397 | 0.43463193 | 0.454562697 | 0.608024581 |
| cg15168958 | FARP1     | 13 | 0.00248015 | 0.35713039 | 0.350734089 | 0.550796844 |
| cg20750642 | FARP1     | 13 | 0.00785654 | 0.20615199 | 0.159242241 | 0.33887884  |
| cg11829616 | FARP1     | 13 | 0.01698967 | 0.44886467 | 0.47449877  | 0.588531766 |
| cg16450249 | FARP1;FA  | 13 | 0.00624349 | 0.17817478 | 0.145770528 | 0.281344382 |
| cg19832331 | FARP1;FA  | 13 | 0.02075286 | 0.62131224 | 0.671936806 | 0.785714156 |
| cg06450397 | FAS;FAS;f | 10 | 0.00079883 | 0.38982478 | 0.46543024  | 0.675172523 |
| cg20656964 | FAT1      | 4  | 0.00314038 | 0.50549028 | 0.556350823 | 0.670082483 |

|            |           |    |            |            |             |             |
|------------|-----------|----|------------|------------|-------------|-------------|
| cg01880399 | FAT1      | 4  | 0.00520163 | 0.30767991 | 0.350981756 | 0.508414412 |
| cg27661793 | FAT1      | 4  | 0.01098413 | 0.22076871 | 0.174105649 | 0.343577434 |
| cg18183817 | FBLN2;FB  | 3  | 0.00077361 | 0.64585865 | 0.726174971 | 0.838170444 |
| cg00498816 | FBLN2;FB  | 3  | 0.00176085 | 0.66564029 | 0.722674738 | 0.823178074 |
| cg04956944 | FBLN7;FB  | 2  | 0.00109472 | 0.39679521 | 0.405853367 | 0.621726591 |
| cg14549078 | FBN1      | 15 | 0.02336655 | 0.18456977 | 0.146958246 | 0.291897661 |
| cg20664313 | FBRSL1    | 12 | 0.00068904 | 0.36227636 | 0.405162135 | 0.548240528 |
| cg19510206 | FBRSL1    | 12 | 0.00702537 | 0.51521585 | 0.543723776 | 0.680190913 |
| cg00960772 | FBRSL1    | 12 | 0.00569156 | 0.30474963 | 0.334521147 | 0.462378864 |
| cg24462656 | FBRSL1    | 12 | 0.0122594  | 0.22314107 | 0.1515971   | 0.339808983 |
| cg24621258 | FBRSL1    | 12 | 0.01817641 | 0.26090651 | 0.183049102 | 0.398646748 |
| cg25750363 | FBRSL1    | 12 | 0.00720967 | 0.24924558 | 0.209817427 | 0.477369425 |
| cg03378525 | FBXL18    | 7  | 0.00243597 | 0.46959031 | 0.484062497 | 0.6046818   |
| cg01149929 | FBXL7     | 5  | 0.02489039 | 0.54387446 | 0.549849745 | 0.656761617 |
| cg02160692 | FBXO11;F  | 2  | 0.01164121 | 0.72010235 | 0.724444778 | 0.826079354 |
| cg24878594 | FBXO2     | 1  | 0.0127705  | 0.15831874 | 0.159870027 | 0.263304775 |
| cg19256813 | FBXO21;F  | 12 | 0.0166015  | 0.19201998 | 0.137141153 | 0.292635187 |
| cg26829322 | FBXO44;F  | 1  | 0.0107931  | 0.35406263 | 0.324483221 | 0.504916339 |
| cg05796704 | FBXO44;F  | 1  | 0.00316372 | 0.148357   | 0.142120621 | 0.28955898  |
| cg05540569 | FBXO47    | 17 | 0.03488234 | 0.14626014 | 0.170933493 | 0.272609558 |
| cg10523001 | FBXW11;   | 5  | 0.01011462 | 0.33385318 | 0.30759575  | 0.521733917 |
| cg23985408 | FBXW11;   | 5  | 0.00295889 | 0.27216457 | 0.329822679 | 0.493010525 |
| cg27371456 | FBXW4     | 10 | 0.01023819 | 0.17333591 | 0.145433623 | 0.324167454 |
| cg08361180 | FBXW4     | 10 | 0.00417561 | 0.14333967 | 0.129296576 | 0.311508086 |
| cg17860133 | FBXW8;FI  | 12 | 0.00281579 | 0.5753524  | 0.598699235 | 0.737722481 |
| cg07050611 | FBXW8;FI  | 12 | 0.00207724 | 0.37528505 | 0.446450574 | 0.609450067 |
| cg22942846 | FCGR2B;F  | 1  | 0.00336153 | 0.3102445  | 0.277223916 | 0.460543683 |
| cg26549860 | FCHSD2    | 11 | 0.0047315  | 0.29924332 | 0.373520322 | 0.516416553 |
| cg24496021 | FCHSD2    | 11 | 0.02980647 | 0.50021384 | 0.493603353 | 0.636560435 |
| cg17467108 | FCHSD2    | 11 | 0.00426883 | 0.54033309 | 0.522168684 | 0.666961467 |
| cg20577477 | FDFT1     | 8  | 0.00648185 | 0.49531319 | 0.509392103 | 0.671325447 |
| cg06979924 | FDPS;FDP  | 1  | 0.00852388 | 0.22235997 | 0.217459574 | 0.338885091 |
| cg26827653 | FEZ1;FEZ: | 11 | 0.01554011 | 0.2539522  | 0.242850003 | 0.36581039  |
| cg07541160 | FGD2      | 6  | 0.00211914 | 0.16011    | 0.159659258 | 0.263972032 |
| cg09718347 | FGD5      | 3  | 0.00147518 | 0.38001378 | 0.486561443 | 0.626615521 |
| cg05173159 | FGD6      | 12 | 0.00387229 | 0.51229544 | 0.531616967 | 0.641055251 |
| cg20684197 | FGF1;FGF  | 5  | 0.00228672 | 0.21026805 | 0.278177466 | 0.481931265 |
| cg21619138 | FGF1;FGF  | 5  | 0.01506509 | 0.18250347 | 0.11847097  | 0.286526294 |
| cg02406096 | FGF1;FGF  | 5  | 0.01672645 | 0.24656328 | 0.210524157 | 0.349616352 |
| cg19576738 | FGF2      | 4  | 0.00187339 | 0.10964145 | 0.148349059 | 0.30160565  |
| cg14703482 | FGF2      | 4  | 0.00539451 | 0.13844226 | 0.129403522 | 0.282080564 |
| cg26955980 | FGF9      | 13 | 0.0103161  | 0.5657343  | 0.568986755 | 0.696172156 |
| cg17091967 | FGFBP1    | 4  | 0.00426288 | 0.32630568 | 0.345276719 | 0.493127945 |
| cg27653103 | FGFR1;FC  | 8  | 0.00211366 | 0.12743128 | 0.13324096  | 0.315515142 |
| cg03552039 | FGFR2;FC  | 10 | 0.00280561 | 0.31102986 | 0.308420755 | 0.479575948 |
| cg13734061 | FGFR2;FC  | 10 | 0.00426288 | 0.52926998 | 0.560277079 | 0.707521043 |

|            |           |    |            |            |             |             |
|------------|-----------|----|------------|------------|-------------|-------------|
| cg25294906 | FGFR2;FC  | 10 | 0.0019906  | 0.36037644 | 0.383639391 | 0.583976636 |
| cg10280007 | FGFR2;FC  | 10 | 0.00897515 | 0.22825629 | 0.264021413 | 0.427183739 |
| cg12226006 | FGFR2;FC  | 10 | 0.00582851 | 0.30715631 | 0.28165689  | 0.537967993 |
| cg14834653 | FGFR2;FC  | 10 | 0.00353204 | 0.19701865 | 0.244367388 | 0.40455322  |
| cg20277356 | FGFR2;FC  | 10 | 0.00873782 | 0.24942825 | 0.292639244 | 0.463133155 |
| cg13175830 | FGFR2;FC  | 10 | 0.00349176 | 0.12259456 | 0.129054092 | 0.272102537 |
| cg17337672 | FGFR2;FC  | 10 | 0.00485228 | 0.33601035 | 0.359488494 | 0.476548591 |
| cg14856220 | FGFR2;FC  | 10 | 0.04333813 | 0.25527151 | 0.295561348 | 0.413173777 |
| cg10362842 | FGFR2;FC  | 10 | 0.0011159  | 0.29877151 | 0.360084233 | 0.482854011 |
| cg10314760 | FGFR2;FC  | 10 | 0.01841511 | 0.29137351 | 0.326791383 | 0.515027376 |
| cg17997363 | FGFR2;FC  | 10 | 0.00521564 | 0.2068611  | 0.21383423  | 0.36636255  |
| cg10788901 | FGFR2;FC  | 10 | 0.00153118 | 0.19714808 | 0.226472556 | 0.326833591 |
| cg00730832 | FGFR2;FC  | 10 | 0.00806395 | 0.18836316 | 0.183020849 | 0.368721597 |
| cg08145949 | FGFR3;FC  | 4  | 0.00079224 | 0.27339587 | 0.307746731 | 0.519137059 |
| cg03629948 | FGFR3;FC  | 4  | 0.02987993 | 0.51528344 | 0.527692481 | 0.630248714 |
| cg02137691 | FGFR3;FC  | 4  | 0.00576163 | 0.40388646 | 0.39322634  | 0.509529379 |
| cg15697036 | FGFR3;FC  | 4  | 0.001181   | 0.38708799 | 0.394862515 | 0.572102254 |
| cg21311834 | FGFR3;FC  | 4  | 0.00162163 | 0.207539   | 0.270391062 | 0.524423389 |
| cg18229134 | FGFR4;FC  | 5  | 0.00336153 | 0.4542154  | 0.459465593 | 0.619991912 |
| cg04849878 | FGFR4;FC  | 5  | 0.01686581 | 0.38559152 | 0.398049443 | 0.518048016 |
| cg00160522 | FGFRL1;F  | 4  | 0.00096621 | 0.46221315 | 0.501527495 | 0.614522597 |
| cg06839424 | FGFRL1;F  | 4  | 0.00073118 | 0.37123585 | 0.416035663 | 0.526904042 |
| cg04145890 | FGFRL1;F  | 4  | 0.00567904 | 0.19477523 | 0.183277373 | 0.294971646 |
| cg18699025 | FGFRL1;F  | 4  | 0.01358672 | 0.23200959 | 0.198839947 | 0.344916052 |
| cg07727358 | FGFRL1;F  | 4  | 0.00127764 | 0.39827888 | 0.428811239 | 0.548549231 |
| cg02826685 | FGFRL1;F  | 4  | 0.00126804 | 0.58569898 | 0.585143276 | 0.764428359 |
| cg08521859 | FGFRL1;F  | 4  | 0.00458661 | 0.19757872 | 0.184090625 | 0.328854732 |
| cg14724492 | FGFRL1;F  | 4  | 0.00167382 | 0.43838852 | 0.45699041  | 0.59858251  |
| cg02014217 | FGFRL1;F  | 4  | 0.00207888 | 0.497238   | 0.495164831 | 0.611317204 |
| cg11411884 | FGFRL1;F  | 4  | 0.00233734 | 0.54130349 | 0.577861474 | 0.715180913 |
| cg14869372 | FGFRL1;F  | 4  | 0.00089116 | 0.39497644 | 0.421046108 | 0.639883865 |
| cg13184177 | FGR;FGR;  | 1  | 0.02376522 | 0.528425   | 0.520875301 | 0.632445631 |
| cg23167456 | FGR;FGR;  | 1  | 0.00283769 | 0.62947252 | 0.653117712 | 0.766865183 |
| cg14160480 | FHAD1     | 1  | 0.01471045 | 0.14156162 | 0.115186776 | 0.259545481 |
| cg11815980 | FHIT;FHIT | 3  | 0.00224923 | 0.41531545 | 0.494290643 | 0.629795439 |
| cg08239282 | FHL2      | 2  | 0.01645625 | 0.18073442 | 0.179542552 | 0.290443933 |
| cg19226017 | FKBP5;LO  | 6  | 0.00376781 | 0.27992924 | 0.30998469  | 0.492609832 |
| cg07702311 | FLI1;FLI1 | 11 | 0.00705117 | 0.4427231  | 0.469030185 | 0.6244091   |
| cg27390009 | FLII      | 17 | 0.00387834 | 0.31933969 | 0.312026132 | 0.43563576  |
| cg01048349 | FLJ10357  | 14 | 0.01342633 | 0.32216539 | 0.32629105  | 0.459788    |
| cg22800743 | FLJ22536  | 6  | 0.00934957 | 0.18167175 | 0.189419544 | 0.345785686 |
| cg26926497 | FLJ22536  | 6  | 0.00396452 | 0.15160002 | 0.151100177 | 0.320015577 |
| cg08373323 | FLJ32810  | 11 | 0.00168532 | 0.2103749  | 0.24966732  | 0.47646614  |
| cg14192935 | FLJ35024  | 9  | 0.00302287 | 0.142449   | 0.146859278 | 0.265347296 |
| cg14761417 | FLJ43663  | 7  | 0.00383939 | 0.40265527 | 0.366402339 | 0.574378238 |
| cg03243768 | FLJ46111  | 11 | 0.00246645 | 0.72749169 | 0.768153071 | 0.899138127 |



|            |          |    |            |            |             |             |
|------------|----------|----|------------|------------|-------------|-------------|
| cg05116002 | FLNB;FLN | 3  | 0.00171175 | 0.18721765 | 0.231930444 | 0.374795731 |
| cg01869548 | FLYWCH2  | 16 | 0.00629918 | 0.47509221 | 0.455998629 | 0.601739254 |
| cg17802486 | FMN1     | 15 | 0.00561885 | 0.16371089 | 0.118040634 | 0.329396102 |
| cg13619277 | FMN1     | 15 | 0.01278183 | 0.15927433 | 0.205465044 | 0.339773655 |
| cg19735250 | FMNL1    | 17 | 0.00555917 | 0.25837956 | 0.259566593 | 0.442614318 |
| cg21617353 | FMNL1    | 17 | 0.0154705  | 0.35155984 | 0.304842577 | 0.496985682 |
| cg20408776 | FMNL1    | 17 | 0.01502763 | 0.32147739 | 0.256765904 | 0.444013156 |
| cg26207245 | FMNL2    | 2  | 0.02115736 | 0.47602376 | 0.476600369 | 0.66086607  |
| cg15705810 | FMNL2    | 2  | 0.00509504 | 0.17758903 | 0.183330052 | 0.384660776 |
| cg06343233 | FMNL2    | 2  | 0.00247433 | 0.3525843  | 0.313427024 | 0.554454264 |
| cg11173609 | FMNL2    | 2  | 0.04220346 | 0.39505642 | 0.380576952 | 0.544408393 |
| cg21860045 | FMNL2    | 2  | 0.00359124 | 0.56160996 | 0.567317392 | 0.748192058 |
| cg16034517 | FMO1     | 1  | 0.02025944 | 0.17218815 | 0.124638065 | 0.294274235 |
| cg12495731 | FN3K     | 17 | 0.00106082 | 0.42474149 | 0.45865325  | 0.706246962 |
| cg08495617 | FNDC3B;f | 3  | 0.00958999 | 0.39868364 | 0.435534073 | 0.584543614 |
| cg12202228 | FNDC3B;f | 3  | 0.02469417 | 0.39180105 | 0.346709575 | 0.531387132 |
| cg00000109 | FNDC3B;f | 3  | 0.00816438 | 0.26673485 | 0.299894091 | 0.481738716 |
| cg26334671 | FNDC3B;f | 3  | 0.00855749 | 0.30623459 | 0.336775521 | 0.511804276 |
| cg00360324 | FNDC4    | 2  | 0.0011122  | 0.62842031 | 0.690261241 | 0.805231688 |
| cg26161895 | FNIP2    | 4  | 0.01895346 | 0.3558055  | 0.420944466 | 0.562096574 |
| cg11244091 | FOXA3    | 19 | 0.00710861 | 0.37187579 | 0.393407065 | 0.513056832 |
| cg23318967 | FOXK1    | 7  | 0.00763406 | 0.39886978 | 0.386488854 | 0.524106585 |
| cg22581896 | FOXK1    | 7  | 0.00684483 | 0.45218602 | 0.484948319 | 0.622076934 |
| cg11931953 | FOXK1    | 7  | 0.00393302 | 0.64683787 | 0.629490034 | 0.8069238   |
| cg05066096 | FOXK1    | 7  | 0.03533922 | 0.49362566 | 0.480633461 | 0.605401054 |
| cg06114605 | FOXK1    | 7  | 0.00376892 | 0.40301424 | 0.459204867 | 0.619903088 |
| cg25330264 | FOXK1    | 7  | 0.00186758 | 0.33328559 | 0.431133804 | 0.545071    |
| cg05237718 | FOXK1    | 7  | 0.00177922 | 0.42864882 | 0.424674119 | 0.573575613 |
| cg06114987 | FOXL1    | 16 | 0.00186737 | 0.59617659 | 0.591707706 | 0.758610266 |
| cg14113778 | FOXN3    | 14 | 0.00089116 | 0.71222589 | 0.728366604 | 0.853351239 |
| cg18359596 | FOXN3;FC | 14 | 0.00677233 | 0.57835263 | 0.602948254 | 0.743500967 |
| cg01838853 | FOXN4    | 12 | 0.00349176 | 0.23144957 | 0.225855719 | 0.378572402 |
| cg07580479 | FOXO3;FC | 6  | 0.01426008 | 0.53488486 | 0.604829806 | 0.709801413 |
| cg19484481 | FOXO3;FC | 6  | 0.00130049 | 0.30233662 | 0.371856092 | 0.62991317  |
| cg15963983 | FOXP1    | 3  | 0.04902903 | 0.51323915 | 0.505421927 | 0.633203612 |
| cg00201568 | FOXP1    | 3  | 0.02115579 | 0.51427527 | 0.528050657 | 0.658047918 |
| cg03504834 | FOXP2;FC | 7  | 0.0261269  | 0.25906692 | 0.293626803 | 0.402385408 |
| cg18871253 | FOXP2;FC | 7  | 0.02394548 | 0.23088073 | 0.206347596 | 0.348346773 |
| cg11177740 | FOXP4;FC | 6  | 0.00213077 | 0.21463753 | 0.217256467 | 0.344591181 |
| cg10719970 | FOXP4;FC | 6  | 0.00845805 | 0.40684614 | 0.402577392 | 0.508363748 |
| cg03127034 | FOXP4;FC | 6  | 0.00092643 | 0.56155366 | 0.562372778 | 0.692632335 |
| cg07588430 | FOXP4;FC | 6  | 0.00112793 | 0.51374314 | 0.538314757 | 0.693627028 |
| cg23867085 | FOXP4;FC | 6  | 0.00232154 | 0.2248223  | 0.221059242 | 0.371840182 |
| cg17631429 | FOXS1    | 20 | 0.00968951 | 0.62827886 | 0.570536276 | 0.785671592 |
| cg15237820 | FRAS1;FR | 4  | 0.00554206 | 0.47446441 | 0.42442033  | 0.642780529 |
| cg13426351 | FREQ     | 9  | 0.0061767  | 0.42921633 | 0.429500943 | 0.577469212 |

|            |          |    |            |            |             |             |
|------------|----------|----|------------|------------|-------------|-------------|
| cg06127202 | FRK      | 6  | 0.00194185 | 0.20605175 | 0.229480167 | 0.379878218 |
| cg24008634 | FRMD4A   | 10 | 0.02385226 | 0.47299573 | 0.494081558 | 0.601579177 |
| cg11813497 | FRMD4A   | 10 | 0.01645625 | 0.30331296 | 0.249348335 | 0.421683638 |
| cg05104995 | FRMPD2;  | 10 | 0.00405622 | 0.50110833 | 0.500303888 | 0.626377183 |
| cg25274185 | FRY      | 13 | 0.00620216 | 0.22807015 | 0.303997494 | 0.409062785 |
| cg16995086 | FRY      | 13 | 0.03241445 | 0.19780414 | 0.221234369 | 0.335775431 |
| cg09188385 | FSCN1    | 7  | 0.00233298 | 0.19308862 | 0.188800412 | 0.383808214 |
| cg13087761 | FSCN1    | 7  | 0.00208745 | 0.1877258  | 0.172459575 | 0.422168029 |
| cg06969129 | FSCN1    | 7  | 0.00893433 | 0.305781   | 0.288804988 | 0.424087052 |
| cg01512532 | FSCN2;FS | 17 | 0.02634735 | 0.28635078 | 0.235650401 | 0.400135042 |
| cg26166170 | FSIP1    | 15 | 0.00368022 | 0.53148895 | 0.566025738 | 0.67684673  |
| cg12075901 | FURIN    | 15 | 0.0011206  | 0.67703085 | 0.697468249 | 0.846808658 |
| cg00758797 | FURIN    | 15 | 0.01205623 | 0.38455046 | 0.443401298 | 0.549744779 |
| cg14231966 | FURIN    | 15 | 0.00219476 | 0.33993468 | 0.345480811 | 0.461451336 |
| cg24256772 | FUT4     | 11 | 0.00357923 | 0.53024541 | 0.535838863 | 0.670161809 |
| cg08863777 | FUT4     | 11 | 0.00086791 | 0.19544058 | 0.215406045 | 0.334137215 |
| cg18554976 | FXD1;FX  | 19 | 0.00270728 | 0.35778305 | 0.310333774 | 0.477663411 |
| cg22335223 | FXD2     | 11 | 0.00066232 | 0.29604415 | 0.354028707 | 0.468482738 |
| cg00480115 | FXD3;FX  | 19 | 0.00554761 | 0.23063072 | 0.220122729 | 0.433443251 |
| cg21304163 | FXD3;FX  | 19 | 0.0026334  | 0.64361765 | 0.655879862 | 0.757187693 |
| cg14848289 | FXD6;FX  | 11 | 0.01189791 | 0.2948122  | 0.252446547 | 0.422170606 |
| cg00161459 | FZD6;FZD | 8  | 0.00648443 | 0.51514576 | 0.556299003 | 0.70912619  |
| cg02906915 | FZD8;FZD | 10 | 0.00704751 | 0.15733755 | 0.127608848 | 0.287514306 |
| cg03009240 | FZR1     | 19 | 0.00607259 | 0.22876829 | 0.180249976 | 0.36273897  |
| cg14142817 | GAB1;GA  | 4  | 0.00103001 | 0.63570834 | 0.667969195 | 0.804179349 |
| cg25742761 | GAB1;GA  | 4  | 0.00852172 | 0.50344202 | 0.541888247 | 0.683714452 |
| cg03286735 | GAK      | 4  | 0.01638971 | 0.36768709 | 0.406530755 | 0.540384228 |
| cg10961323 | GALE;GAI | 1  | 0.01966537 | 0.24078719 | 0.223893776 | 0.348169936 |
| cg21523719 | GALE;GAI | 1  | 0.00961487 | 0.32920955 | 0.327358678 | 0.476677429 |
| cg08466889 | GALNS    | 16 | 0.00444845 | 0.51394951 | 0.454657338 | 0.622721485 |
| cg09308897 | GALNS    | 16 | 0.00197986 | 0.36817469 | 0.360916429 | 0.522294054 |
| cg08894593 | GALNS    | 16 | 0.02568798 | 0.15763427 | 0.141246047 | 0.283567115 |
| cg06062279 | GALNS    | 16 | 0.0022998  | 0.52773442 | 0.534277217 | 0.635438282 |
| cg14968553 | GALNT10  | 5  | 0.00247655 | 0.49984154 | 0.493617449 | 0.664429098 |
| cg00563858 | GALNT10  | 5  | 0.00209262 | 0.32783142 | 0.324758954 | 0.558349408 |
| cg00566187 | GALNT2   | 1  | 0.02524768 | 0.42849796 | 0.481479177 | 0.623568166 |
| cg26525772 | GALNT2   | 1  | 0.0174639  | 0.31889254 | 0.349794577 | 0.526737436 |
| cg16698674 | GALNT2   | 1  | 0.0058315  | 0.29888934 | 0.327221306 | 0.496186803 |
| cg15817769 | GALNT2   | 1  | 0.00284268 | 0.20937662 | 0.253909312 | 0.443981842 |
| cg16246661 | GALNT2   | 1  | 0.03209984 | 0.38264293 | 0.409759963 | 0.574710804 |
| cg12526197 | GALNT2   | 1  | 0.00184569 | 0.2155049  | 0.235589596 | 0.349696867 |
| cg17954142 | GALNT2   | 1  | 0.0011143  | 0.32567498 | 0.37575141  | 0.509787118 |
| cg15438014 | GALNTL2  | 3  | 0.02003709 | 0.61458479 | 0.609853511 | 0.731544864 |
| cg03299336 | GALNTL4  | 11 | 0.00464252 | 0.53785084 | 0.5397074   | 0.651375472 |
| cg15094908 | GALNTL4  | 11 | 0.00275412 | 0.16181515 | 0.156890749 | 0.338945908 |
| cg23678274 | GALNTL4  | 11 | 0.0047737  | 0.10830331 | 0.108167931 | 0.240873742 |

|            |           |    |            |            |             |             |
|------------|-----------|----|------------|------------|-------------|-------------|
| cg05527856 | GALNTL4   | 11 | 0.00151139 | 0.20192495 | 0.214092489 | 0.408186985 |
| cg21089050 | GAS7      | 17 | 0.00100561 | 0.6419203  | 0.671338096 | 0.814398028 |
| cg10296867 | GAS7      | 17 | 0.00067859 | 0.60118773 | 0.695152691 | 0.814052308 |
| cg10237765 | GAS7;GA'  | 17 | 0.00539186 | 0.37868542 | 0.412169928 | 0.527703039 |
| cg10089865 | GATA3;G,  | 10 | 0.00512138 | 0.59425255 | 0.538675365 | 0.747913203 |
| cg03935183 | GATA3;G,  | 10 | 0.01884096 | 0.52220283 | 0.571014111 | 0.706588771 |
| cg25209111 | GBF1      | 10 | 0.04622903 | 0.29851985 | 0.287504915 | 0.408975579 |
| cg12105183 | GBP6      | 1  | 0.00283173 | 0.44375499 | 0.419723265 | 0.594751543 |
| cg02868790 | GCLC      | 6  | 0.0019906  | 0.30559208 | 0.343488429 | 0.564536964 |
| cg20546778 | GDAP1;G   | 8  | 0.02853243 | 0.28231911 | 0.248870828 | 0.393296118 |
| cg19239052 | GDF10     | 10 | 0.00102816 | 0.23254842 | 0.237037444 | 0.343426397 |
| cg12433084 | GDF10     | 10 | 0.00314038 | 0.18833924 | 0.18716451  | 0.324866542 |
| cg13565300 | GDF10     | 10 | 0.00485228 | 0.18593301 | 0.181751239 | 0.302079824 |
| cg17417496 | GDF5      | 20 | 0.00081925 | 0.65810869 | 0.661323093 | 0.78548998  |
| cg08062713 | GDF5      | 20 | 0.0046677  | 0.632859   | 0.615852453 | 0.827195156 |
| cg05567631 | GDPD5     | 11 | 0.01124644 | 0.43003646 | 0.404010115 | 0.543615134 |
| cg22610645 | GEFT;GEF  | 12 | 0.00775531 | 0.27359265 | 0.259781973 | 0.377477454 |
| cg18383668 | GEMIN7;(  | 19 | 0.0021194  | 0.25084889 | 0.21761679  | 0.370236798 |
| cg01769243 | GFAP;GF/  | 17 | 0.00324717 | 0.33224513 | 0.308647858 | 0.442510445 |
| cg03383006 | GFAP;GF/  | 17 | 0.00553815 | 0.38490138 | 0.377086701 | 0.535108773 |
| cg09639715 | GFAP;GF/  | 17 | 0.00556197 | 0.21391275 | 0.199438027 | 0.322148462 |
| cg00318322 | GFOD2;G   | 16 | 0.01612589 | 0.55919255 | 0.535833891 | 0.664124448 |
| cg14476487 | GFPT1     | 2  | 0.04382199 | 0.62431394 | 0.652456395 | 0.759425112 |
| cg06845268 | GFPT1     | 2  | 0.01004931 | 0.52201235 | 0.536520165 | 0.679327794 |
| cg26338723 | GFRA1;Gi  | 10 | 0.00180551 | 0.38715607 | 0.419108886 | 0.562373757 |
| cg20626616 | GHRL;GH   | 3  | 0.01760238 | 0.44889654 | 0.435042894 | 0.61027374  |
| cg11030744 | GHRL;GH   | 3  | 0.00882698 | 0.50538567 | 0.453728674 | 0.677323036 |
| cg08489410 | GHRL;GH   | 3  | 0.00388142 | 0.46038601 | 0.433520701 | 0.660634818 |
| cg07871024 | GHRL;GH   | 3  | 0.0037901  | 0.63150795 | 0.635936721 | 0.754410373 |
| cg14528319 | GIPC1;GII | 19 | 0.00563693 | 0.19624934 | 0.169799851 | 0.297945647 |
| cg17337670 | GIT2;GIT2 | 12 | 0.00186737 | 0.50144193 | 0.557308678 | 0.657520938 |
| cg03650119 | GJC2      | 1  | 0.01471045 | 0.31613395 | 0.305986612 | 0.450935862 |
| cg09257635 | GJC2      | 1  | 0.00597656 | 0.20638682 | 0.189540621 | 0.325241089 |
| cg14773228 | GLI2      | 2  | 0.00195549 | 0.6039942  | 0.619533437 | 0.774570293 |
| cg21133992 | GLI2      | 2  | 0.00219764 | 0.23296943 | 0.229170065 | 0.368240183 |
| cg11791452 | GLI2      | 2  | 0.00111281 | 0.16402142 | 0.18586955  | 0.330712    |
| cg01791238 | GLI2      | 2  | 0.00147208 | 0.20028318 | 0.236654558 | 0.424068497 |
| cg02774705 | GLI2      | 2  | 0.00123883 | 0.41482711 | 0.399104888 | 0.676062537 |
| cg10120778 | GLI3      | 7  | 0.00971128 | 0.42943411 | 0.377543146 | 0.595131759 |
| cg09008589 | GLI3      | 7  | 0.01026031 | 0.16604354 | 0.14631066  | 0.319486836 |
| cg15078211 | GLI3      | 7  | 0.00857641 | 0.28405668 | 0.280119272 | 0.496739381 |
| cg22857963 | GLI4      | 8  | 0.00269197 | 0.17646621 | 0.132964905 | 0.303459994 |
| cg14825413 | GLI4      | 8  | 0.00901377 | 0.24216452 | 0.192302592 | 0.363011736 |
| cg27311970 | GLIS1     | 1  | 0.01678972 | 0.25986182 | 0.227106115 | 0.408045487 |
| cg05040219 | GLIS1     | 1  | 0.03236546 | 0.2456179  | 0.235167519 | 0.350103725 |
| cg08602528 | GLIS2     | 16 | 0.00377206 | 0.35934591 | 0.352161739 | 0.468572781 |

|            |          |    |            |            |             |             |
|------------|----------|----|------------|------------|-------------|-------------|
| cg04694492 | GLIS2    | 16 | 0.0039985  | 0.29869225 | 0.278706117 | 0.46488659  |
| cg05052407 | GLIS2    | 16 | 0.00175728 | 0.32770037 | 0.299755895 | 0.485752254 |
| cg14590902 | GLT1D1   | 12 | 0.0154863  | 0.55285667 | 0.565397313 | 0.694998252 |
| cg26736878 | GLT25D1  | 19 | 0.00339981 | 0.35232583 | 0.360988947 | 0.520568417 |
| cg25605307 | GLT25D2  | 1  | 0.00556621 | 0.29143868 | 0.345490872 | 0.495353493 |
| cg03704673 | GLTPD2;C | 17 | 0.00186404 | 0.29277806 | 0.323245025 | 0.491730327 |
| cg07515565 | GMDS     | 6  | 0.01361135 | 0.28680886 | 0.231104148 | 0.391762189 |
| cg11786839 | GMDS     | 6  | 0.00148102 | 0.50016898 | 0.47660881  | 0.617260424 |
| cg13394216 | GMDS     | 6  | 0.00190306 | 0.23977888 | 0.27616782  | 0.434124169 |
| cg10707788 | GMDS     | 6  | 0.00471011 | 0.35378115 | 0.378388541 | 0.504893015 |
| cg01465824 | GMDS     | 6  | 0.01206219 | 0.17676853 | 0.160719746 | 0.332069762 |
| cg14358088 | GMDS     | 6  | 0.03645999 | 0.17459203 | 0.19611376  | 0.332946702 |
| cg06007850 | GMDS     | 6  | 0.02326197 | 0.2977772  | 0.350310663 | 0.466433291 |
| cg16762849 | GMDS     | 6  | 0.00117965 | 0.2513828  | 0.267369486 | 0.512268645 |
| cg08840441 | GMIP     | 19 | 0.00134295 | 0.32425477 | 0.334445344 | 0.504735662 |
| cg07899459 | GMIP     | 19 | 0.00674227 | 0.29092036 | 0.245500708 | 0.432401608 |
| cg14694205 | GMPS     | 3  | 0.02241528 | 0.30745833 | 0.401169803 | 0.503004735 |
| cg24366168 | GNA11    | 19 | 0.00137603 | 0.31822505 | 0.320054099 | 0.471240358 |
| cg05308829 | GNA12    | 7  | 0.00449258 | 0.58532019 | 0.63905364  | 0.779161696 |
| cg06173857 | GNA12    | 7  | 0.00100019 | 0.6700184  | 0.697228581 | 0.856170573 |
| cg02046881 | GNA12    | 7  | 0.00682394 | 0.64559588 | 0.653339379 | 0.777109061 |
| cg21028562 | GNAI2;G  | 3  | 0.00997527 | 0.31631181 | 0.296755488 | 0.422776139 |
| cg08644463 | GNAI3    | 1  | 0.0137817  | 0.42701423 | 0.395912093 | 0.542506515 |
| cg04037585 | GNAO1;G  | 16 | 0.00684483 | 0.40411809 | 0.429264746 | 0.554505733 |
| cg17658854 | GNAS;GN  | 20 | 0.00975114 | 0.49171068 | 0.470472244 | 0.597224757 |
| cg21971807 | GNAS;GN  | 20 | 0.02757672 | 0.32398516 | 0.340963365 | 0.47509542  |
| cg11021321 | GNAS;GN  | 20 | 0.01678972 | 0.2611458  | 0.256528015 | 0.377182754 |
| cg13680388 | GNAS;GN  | 20 | 0.0283256  | 0.35970601 | 0.364535669 | 0.473585152 |
| cg24714094 | GNAZ;RTI | 22 | 0.00446647 | 0.28742677 | 0.298151848 | 0.454045882 |
| cg00808175 | GNB3     | 12 | 0.0012838  | 0.6160416  | 0.621987839 | 0.741520402 |
| cg16433737 | GNB3     | 12 | 0.00131641 | 0.28202413 | 0.293555685 | 0.488467325 |
| cg08407014 | GNG7     | 19 | 0.028548   | 0.21778842 | 0.18683988  | 0.328616952 |
| cg27176392 | GNG7     | 19 | 0.0071227  | 0.65980394 | 0.660766152 | 0.77947786  |
| cg04267184 | GNRH2;G  | 20 | 0.00576931 | 0.15371438 | 0.129896519 | 0.27984912  |
| cg08436467 | GNRH2;G  | 20 | 0.0338225  | 0.50310358 | 0.4942576   | 0.610949735 |
| cg08424446 | GOLGA3   | 12 | 0.00208616 | 0.6583636  | 0.657527847 | 0.784283654 |
| cg05614952 | GOLGA3   | 12 | 0.00263371 | 0.5997674  | 0.591562879 | 0.727806493 |
| cg16120883 | GOLGA3   | 12 | 0.00685049 | 0.48470557 | 0.466852947 | 0.687300177 |
| cg17346500 | GOLIM4   | 3  | 0.00248997 | 0.34633201 | 0.380212489 | 0.613788834 |
| cg14574047 | GOLM1;C  | 9  | 0.03434255 | 0.54253706 | 0.530179732 | 0.64601624  |
| cg00782690 | GORASP2  | 2  | 0.01137235 | 0.38525613 | 0.380914777 | 0.502301194 |
| cg15011026 | GPATCH2  | 1  | 0.03513796 | 0.19181252 | 0.1532746   | 0.321786925 |
| cg05087722 | GPC1     | 2  | 0.00073118 | 0.54153618 | 0.556244388 | 0.704507821 |
| cg20094506 | GPC1     | 2  | 0.0008696  | 0.44473806 | 0.46987728  | 0.588053817 |
| cg17676994 | GPC1     | 2  | 0.00088355 | 0.38085109 | 0.425850885 | 0.533888403 |
| cg06047020 | GPC6     | 13 | 0.0010144  | 0.23317339 | 0.27326359  | 0.448880456 |

|            |          |    |            |            |             |             |
|------------|----------|----|------------|------------|-------------|-------------|
| cg11772527 | GPC6     | 13 | 0.00168532 | 0.23185062 | 0.280258707 | 0.545237302 |
| cg26671050 | GPC6     | 13 | 0.00590538 | 0.56402284 | 0.564518788 | 0.715415397 |
| cg15318697 | GPD1L    | 3  | 0.00178025 | 0.30634281 | 0.280773284 | 0.527514007 |
| cg25679431 | GPD1L    | 3  | 0.00097487 | 0.4488806  | 0.423489755 | 0.692523136 |
| cg07537750 | GPHA2    | 11 | 0.00150566 | 0.42592624 | 0.467891037 | 0.577382901 |
| cg13393408 | GPR107;C | 9  | 0.00233439 | 0.4312883  | 0.464502268 | 0.655186102 |
| cg16204524 | GPR113   | 2  | 0.02128084 | 0.38043193 | 0.444726305 | 0.549845548 |
| cg12869334 | GPR124   | 8  | 0.00754388 | 0.2729186  | 0.247830483 | 0.416576227 |
| cg19861632 | GPR125   | 4  | 0.00716301 | 0.27489793 | 0.280820873 | 0.388336171 |
| cg26126417 | GPR126;C | 6  | 0.01102429 | 0.21808518 | 0.231117038 | 0.360774629 |
| cg01008088 | GPR133   | 12 | 0.01064552 | 0.42042869 | 0.348462126 | 0.595129079 |
| cg12528056 | GPR44    | 11 | 0.00448016 | 0.36760789 | 0.342531861 | 0.589023579 |
| cg08343644 | GPR56;G  | 16 | 0.02351176 | 0.2765489  | 0.268924042 | 0.383632276 |
| cg19592277 | GPR75;LC | 2  | 0.01815312 | 0.2797091  | 0.211571473 | 0.38653703  |
| cg10124812 | GPR75;LC | 2  | 0.01390004 | 0.29841617 | 0.288739104 | 0.400815911 |
| cg11939825 | GPR75;LC | 2  | 0.03856073 | 0.41397011 | 0.392441684 | 0.521355898 |
| cg09167413 | GPR98;G  | 5  | 0.00312077 | 0.52316152 | 0.521054543 | 0.680941269 |
| cg18421360 | GPR98;G  | 5  | 0.01077982 | 0.3781523  | 0.437543228 | 0.602754706 |
| cg19212391 | GPRC5C;C | 17 | 0.00117602 | 0.60437201 | 0.623723798 | 0.77611627  |
| cg14471064 | GPSM1    | 9  | 0.00149248 | 0.30299847 | 0.313503228 | 0.476473946 |
| cg14213590 | GPSM1    | 9  | 0.00073265 | 0.1109024  | 0.17245017  | 0.344436377 |
| cg13799504 | GPSM1    | 9  | 0.00382061 | 0.20388395 | 0.221352234 | 0.353224776 |
| cg22984256 | GPSM1    | 9  | 0.0011414  | 0.19997291 | 0.204772675 | 0.305951951 |
| cg21195231 | GPSM1    | 9  | 0.01126909 | 0.20631274 | 0.176485283 | 0.318035795 |
| cg14934821 | GPSM1;G  | 9  | 0.00168532 | 0.22813732 | 0.222474293 | 0.367064432 |
| cg04305913 | GPSM1;G  | 9  | 0.00112793 | 0.20074163 | 0.208454112 | 0.317253682 |
| cg01393841 | GPSM1;G  | 9  | 0.00608343 | 0.45829365 | 0.412201937 | 0.611339932 |
| cg14040131 | GPSM1;G  | 9  | 0.00099274 | 0.22908856 | 0.234106957 | 0.43720324  |
| cg14271150 | GPSM1;G  | 9  | 0.00128812 | 0.38284738 | 0.390465048 | 0.549257739 |
| cg13705014 | GPSM1;G  | 9  | 0.00118326 | 0.3827226  | 0.375534285 | 0.524403605 |
| cg14489965 | GPSM1;G  | 9  | 0.00076043 | 0.36320197 | 0.411814887 | 0.626804664 |
| cg14203108 | GPSM1;G  | 9  | 0.00283173 | 0.3059525  | 0.334562137 | 0.436699782 |
| cg00280345 | GPT      | 8  | 0.00610693 | 0.18677226 | 0.17608514  | 0.301799913 |
| cg07658280 | GPT      | 8  | 0.00341517 | 0.32766491 | 0.353094942 | 0.543328946 |
| cg05241828 | GPT      | 8  | 0.00701189 | 0.25594284 | 0.236182569 | 0.446315297 |
| cg09957864 | GPT      | 8  | 0.0069524  | 0.25613763 | 0.260016966 | 0.467556614 |
| cg25600446 | GPT      | 8  | 0.01096214 | 0.25250924 | 0.250193599 | 0.376575283 |
| cg15983520 | GPT      | 8  | 0.00181696 | 0.38349489 | 0.410904721 | 0.60792318  |
| cg05380921 | GPT2;GP1 | 16 | 0.00168532 | 0.1926149  | 0.234287244 | 0.380163289 |
| cg26155983 | GPX2     | 14 | 0.00385922 | 0.52622214 | 0.552702074 | 0.702900167 |
| cg06733347 | GRAMD2   | 15 | 0.00262867 | 0.39746227 | 0.405043364 | 0.547056918 |
| cg25356006 | GRAMD2   | 15 | 0.02103823 | 0.21462615 | 0.196601623 | 0.326287196 |
| cg21811450 | GRAMD4   | 22 | 0.0122594  | 0.36838481 | 0.338968061 | 0.478850667 |
| cg04955856 | GRAMD4   | 22 | 0.00456803 | 0.45788089 | 0.397914333 | 0.563922435 |
| cg09150232 | GRB10    | 7  | 0.01530568 | 0.35453211 | 0.350270321 | 0.512454473 |
| cg18047172 | GRB10;G  | 7  | 0.00332795 | 0.20680153 | 0.205603569 | 0.34628148  |

|            |          |    |            |            |             |             |
|------------|----------|----|------------|------------|-------------|-------------|
| cg02787989 | GREB1;GI | 2  | 0.00337574 | 0.37010507 | 0.382418786 | 0.505351695 |
| cg14605150 | GREM1    | 15 | 0.00339981 | 0.37230753 | 0.460379198 | 0.618615013 |
| cg13651876 | GRHPR    | 9  | 0.00335524 | 0.19320469 | 0.16528087  | 0.413907786 |
| cg07633435 | GRIA1;GF | 5  | 0.00261671 | 0.34851007 | 0.333022059 | 0.537649348 |
| cg19670474 | GRID2    | 4  | 0.00507632 | 0.58326304 | 0.566655366 | 0.699795686 |
| cg17897352 | GRK5     | 10 | 0.00092849 | 0.35611793 | 0.388757573 | 0.520628616 |
| cg10399824 | GRK5     | 10 | 0.00684483 | 0.59021954 | 0.622112184 | 0.737456344 |
| cg13739115 | GRK5     | 10 | 0.01206679 | 0.17719183 | 0.138707985 | 0.312726657 |
| cg26759179 | GRK5     | 10 | 0.02087024 | 0.19262639 | 0.192386275 | 0.293215178 |
| cg18001722 | GRK5     | 10 | 0.01447617 | 0.30381114 | 0.320982174 | 0.555862803 |
| cg16395614 | GRK5     | 10 | 0.01207774 | 0.57692538 | 0.590484204 | 0.716126825 |
| cg00522048 | GRK5     | 10 | 0.00066232 | 0.29165962 | 0.400981802 | 0.530923237 |
| cg23537932 | GRK5     | 10 | 0.00070285 | 0.47619639 | 0.574291068 | 0.722456222 |
| cg24807198 | GRK5     | 10 | 0.0103127  | 0.26899199 | 0.251423686 | 0.374866728 |
| cg00993388 | GRLF1    | 19 | 0.00937895 | 0.43650793 | 0.464701841 | 0.60200821  |
| cg25520422 | GRM5;GF  | 11 | 0.03169761 | 0.42271709 | 0.453863436 | 0.610717667 |
| cg04020590 | GRTP1    | 13 | 0.00130049 | 0.28866171 | 0.340416404 | 0.518270643 |
| cg01695643 | GSC      | 14 | 0.00218429 | 0.21008667 | 0.332727698 | 0.472963811 |
| cg23074992 | GSC      | 14 | 0.00138239 | 0.16121402 | 0.269648903 | 0.398887854 |
| cg13702181 | GSTZ1;GS | 14 | 0.00190848 | 0.24920852 | 0.253403903 | 0.436159029 |
| cg05738924 | GTDC1;G  | 2  | 0.02304757 | 0.17707262 | 0.183860115 | 0.329664576 |
| cg03598457 | GTF3C1   | 16 | 0.00109794 | 0.16187164 | 0.168877875 | 0.325153797 |
| cg27372015 | GTF3C1   | 16 | 0.00158389 | 0.18363106 | 0.20830584  | 0.409372809 |
| cg19202813 | GULP1    | 2  | 0.01158752 | 0.44003651 | 0.449646474 | 0.630351244 |
| cg03392710 | GULP1    | 2  | 0.00209505 | 0.72219287 | 0.693117506 | 0.826565012 |
| cg16335858 | GYLTL1B  | 11 | 0.00065949 | 0.24024783 | 0.302058389 | 0.455586631 |
| cg09025327 | H6PD     | 1  | 0.00586842 | 0.18003786 | 0.200729979 | 0.320209603 |
| cg04566694 | H6PD     | 1  | 0.00551242 | 0.43376366 | 0.431143172 | 0.620762704 |
| cg16256342 | H6PD     | 1  | 0.01789965 | 0.58556153 | 0.562181965 | 0.686716187 |
| cg01566965 | HAND2    | 4  | 0.00189892 | 0.15923418 | 0.24982108  | 0.369962618 |
| cg27218796 | HAND2    | 4  | 0.00223317 | 0.16792847 | 0.246123807 | 0.417292441 |
| cg08297751 | HAND2    | 4  | 0.0032263  | 0.17809025 | 0.227754117 | 0.373361625 |
| cg25325949 | HAPLN1   | 5  | 0.00403008 | 0.30184819 | 0.333854675 | 0.512373022 |
| cg01045835 | HAPLN1   | 5  | 0.03129757 | 0.2521126  | 0.263641531 | 0.418077015 |
| cg22006672 | HAPLN1   | 5  | 0.00233544 | 0.4699018  | 0.473781284 | 0.640720924 |
| cg18156471 | HAPLN1   | 5  | 0.01109894 | 0.13014474 | 0.134392251 | 0.254120272 |
| cg08317426 | HAPLN3   | 15 | 0.00594682 | 0.42919482 | 0.45160988  | 0.576423524 |
| cg13420004 | HAPLN3   | 15 | 0.0070644  | 0.23328172 | 0.226562191 | 0.38900145  |
| cg12828294 | HAS2     | 8  | 0.0074902  | 0.39668211 | 0.473200496 | 0.627249881 |
| cg20737909 | HCCA2    | 11 | 0.00158181 | 0.24437408 | 0.26415245  | 0.365113811 |
| cg15470102 | HCCA2    | 11 | 0.00130219 | 0.25673    | 0.286239734 | 0.455280516 |
| cg03565674 | HCCA2    | 11 | 0.00077739 | 0.20875241 | 0.241014967 | 0.409043041 |
| cg22979615 | HCCA2    | 11 | 0.00111057 | 0.50548656 | 0.50623229  | 0.675597688 |
| cg26892308 | HCCA2    | 11 | 0.0009502  | 0.43145657 | 0.434338953 | 0.537911123 |
| cg24803059 | HCCA2    | 11 | 0.00113577 | 0.50661829 | 0.523364924 | 0.739052637 |
| cg09947611 | HCCA2    | 11 | 0.03110358 | 0.35120308 | 0.352790594 | 0.484307506 |

|            |           |    |            |            |             |             |
|------------|-----------|----|------------|------------|-------------|-------------|
| cg21051815 | HCCA2     | 11 | 0.00367311 | 0.26808066 | 0.240839386 | 0.413237771 |
| cg25050723 | HCCA2;C1  | 11 | 0.00141699 | 0.25709197 | 0.280917157 | 0.505137268 |
| cg13978447 | HCCA2;LC  | 11 | 0.00453677 | 0.47704831 | 0.5072426   | 0.652775574 |
| cg10900641 | HCCA2;LC  | 11 | 0.00173267 | 0.28751462 | 0.264901546 | 0.428059701 |
| cg08966208 | HCCA2;LC  | 11 | 0.00741048 | 0.12891479 | 0.140821196 | 0.247702624 |
| cg03934392 | HCCA2;LC  | 11 | 0.00425638 | 0.24942228 | 0.251900881 | 0.398439245 |
| cg23598212 | HCCA2;LC  | 11 | 0.00405622 | 0.24271575 | 0.242509446 | 0.349020454 |
| cg13337307 | HCRT      | 17 | 0.00905411 | 0.38237775 | 0.376837404 | 0.493771167 |
| cg25893831 | HDAC1     | 1  | 0.01750762 | 0.407979   | 0.515331543 | 0.617815458 |
| cg05446471 | HDAC11;I  | 3  | 0.00283173 | 0.23017084 | 0.230552531 | 0.367909269 |
| cg06568490 | HDAC11;I  | 3  | 0.00383289 | 0.24394795 | 0.254212388 | 0.414900853 |
| cg17410431 | HDAC4     | 2  | 0.00155292 | 0.10030948 | 0.111172305 | 0.24410382  |
| cg03475776 | HDAC4     | 2  | 0.00092022 | 0.2611874  | 0.312223585 | 0.41398363  |
| cg23870168 | HDAC4     | 2  | 0.00263648 | 0.1738454  | 0.168354385 | 0.290584711 |
| cg20924425 | HDAC4     | 2  | 0.00209829 | 0.32146811 | 0.289073614 | 0.549925695 |
| cg09664216 | HDAC4     | 2  | 0.00359124 | 0.62714412 | 0.618841794 | 0.744122517 |
| cg06855182 | HDAC4     | 2  | 0.00229687 | 0.22104283 | 0.228989508 | 0.501921177 |
| cg04869380 | HDAC4     | 2  | 0.00380612 | 0.21965449 | 0.232948675 | 0.401171364 |
| cg19770748 | HDAC4     | 2  | 0.00258198 | 0.42851606 | 0.420688409 | 0.542844319 |
| cg01641368 | HDAC4     | 2  | 0.00186784 | 0.43137981 | 0.454773323 | 0.555903078 |
| cg05684907 | HDAC9;H   | 7  | 0.00851187 | 0.37173924 | 0.383270369 | 0.596373327 |
| cg21464220 | HDLBP     | 2  | 0.00575746 | 0.37143093 | 0.325323949 | 0.529867637 |
| cg18969029 | HDLBP;HI  | 2  | 0.0194986  | 0.5888214  | 0.609777165 | 0.717957232 |
| cg09386050 | HEATR2    | 7  | 0.00221513 | 0.4722828  | 0.403388376 | 0.594726086 |
| cg01743658 | HEATR5A   | 14 | 0.00322149 | 0.36656965 | 0.406720575 | 0.529428591 |
| cg07570069 | HEATR5A   | 14 | 0.0020873  | 0.3761701  | 0.37732543  | 0.548271881 |
| cg00213745 | HEG1      | 3  | 0.00293735 | 0.53077573 | 0.556784557 | 0.670436073 |
| cg14706455 | HEG1      | 3  | 0.00126466 | 0.21439308 | 0.195180865 | 0.347100673 |
| cg10839322 | HERC2     | 15 | 0.00101054 | 0.38056757 | 0.545871675 | 0.66690165  |
| cg11774232 | HERC2     | 15 | 0.00518187 | 0.53720008 | 0.500425081 | 0.64683551  |
| cg20695534 | HHAT;HH   | 1  | 0.03524554 | 0.32002452 | 0.313900173 | 0.444266932 |
| cg08240383 | HHAT;HH   | 1  | 0.01047255 | 0.15124301 | 0.132084288 | 0.276168073 |
| cg01123449 | HHIPL1    | 14 | 0.00414415 | 0.19833312 | 0.191080986 | 0.395757948 |
| cg26025557 | HIGD1A;I  | 3  | 0.00184462 | 0.55090489 | 0.631323079 | 0.773468353 |
| cg16272084 | HIP1      | 7  | 0.00144385 | 0.30336069 | 0.326725894 | 0.529186625 |
| cg02025034 | HIP1R     | 12 | 0.00294138 | 0.10312939 | 0.109468487 | 0.215858095 |
| cg10803309 | HIPK3;HIF | 11 | 0.000777   | 0.73473387 | 0.764803643 | 0.868299688 |
| cg03234702 | HIST1H3E  | 6  | 0.02555878 | 0.30134476 | 0.231147593 | 0.411606047 |
| cg03450107 | HIVEP3;H  | 1  | 0.00137182 | 0.63408054 | 0.652531358 | 0.800214528 |
| cg27169610 | HIVEP3;H  | 1  | 0.00108946 | 0.51270343 | 0.520005943 | 0.722949832 |
| cg00542261 | HK1;HK1;  | 10 | 0.00117377 | 0.14480673 | 0.158672603 | 0.387743145 |
| cg20520115 | HK2       | 2  | 0.00065949 | 0.21534389 | 0.273399406 | 0.379395423 |
| cg10850215 | HLA-DPB:  | 6  | 0.00233439 | 0.20970388 | 0.152553264 | 0.335461785 |
| cg20223237 | HLA-DPB:  | 6  | 0.01783758 | 0.21318474 | 0.157377403 | 0.316094848 |
| cg26228476 | HLA-DQB   | 6  | 0.04317828 | 0.44460426 | 0.413788978 | 0.553707856 |
| cg17316649 | HLA-DRB:  | 6  | 0.00855749 | 0.17036706 | 0.14492977  | 0.298779308 |

|            |            |    |            |            |             |             |
|------------|------------|----|------------|------------|-------------|-------------|
| cg06032479 | HLA-DRB:   | 6  | 0.00423803 | 0.31885251 | 0.254914637 | 0.441746489 |
| cg27159583 | HLCS       | 21 | 0.00866099 | 0.15475867 | 0.13308687  | 0.280984403 |
| cg09515921 | HLX        | 1  | 0.01039075 | 0.4796285  | 0.536957198 | 0.646064712 |
| cg26440142 | HLX        | 1  | 0.00976037 | 0.24448049 | 0.268563777 | 0.381965098 |
| cg08655206 | HLX        | 1  | 0.00233734 | 0.30387247 | 0.306217159 | 0.433819771 |
| cg14531576 | HMCN1;N    | 1  | 0.00168532 | 0.16486134 | 0.196805314 | 0.354561999 |
| cg09996240 | HMG20B     | 19 | 0.04716956 | 0.74754662 | 0.725906269 | 0.849926271 |
| cg07355069 | HMGCS1;    | 5  | 0.0026334  | 0.45970518 | 0.514652546 | 0.65148767  |
| cg13976683 | HMGCS2;    | 1  | 0.0106258  | 0.20436479 | 0.21002219  | 0.312325985 |
| cg09828010 | HMP19      | 5  | 0.0015244  | 0.66250258 | 0.621858906 | 0.794418889 |
| cg14818176 | HN1;HN1    | 17 | 0.04196515 | 0.49919013 | 0.447787746 | 0.629651685 |
| cg19142553 | HNRNPA2    | 7  | 0.00202182 | 0.27697206 | 0.293195475 | 0.398781168 |
| cg17002899 | HNRNPC;    | 14 | 0.00218429 | 0.24635385 | 0.261717111 | 0.396762627 |
| cg19817912 | HOXA3      | 7  | 0.00118326 | 0.55217198 | 0.58183545  | 0.770178085 |
| cg24469729 | HOXA3;H    | 7  | 0.00081789 | 0.15286345 | 0.171654396 | 0.299586832 |
| cg07094847 | HOXA3;H    | 7  | 0.00275824 | 0.45579219 | 0.497190152 | 0.678553247 |
| cg12538674 | HOXA3;H    | 7  | 0.00160273 | 0.41648008 | 0.517922968 | 0.629615101 |
| cg24389585 | HOXA5      | 7  | 0.00353532 | 0.39201001 | 0.419238025 | 0.628538212 |
| cg05349837 | HOXC4      | 12 | 0.00330705 | 0.15625742 | 0.15025447  | 0.291132244 |
| cg14345676 | HRH2;HR    | 5  | 0.01235814 | 0.22538804 | 0.227272619 | 0.388751577 |
| cg24366429 | HRNBP3     | 17 | 0.00628685 | 0.27945879 | 0.277525144 | 0.387524683 |
| cg24895178 | HS3ST3B:   | 17 | 0.015222   | 0.63492356 | 0.600254745 | 0.748860715 |
| cg17863312 | HS3ST3B:   | 17 | 0.03166005 | 0.56284235 | 0.555702416 | 0.6708369   |
| cg11416620 | HS6ST1     | 2  | 0.00065949 | 0.33174554 | 0.381831265 | 0.547101108 |
| cg27405010 | HSBP1      | 16 | 0.00161871 | 0.38562684 | 0.372454703 | 0.580458538 |
| cg05315365 | HSD17B2    | 16 | 0.00359753 | 0.25500547 | 0.29515757  | 0.419653848 |
| cg15854333 | HSD17B8    | 6  | 0.00652679 | 0.20476668 | 0.189186473 | 0.330236379 |
| cg22896793 | HSPA12B    | 20 | 0.0023961  | 0.31223399 | 0.316541694 | 0.427635297 |
| cg13320181 | HSPB7      | 1  | 0.00425638 | 0.15574982 | 0.148338872 | 0.258492363 |
| cg21945949 | HSPC159    | 2  | 0.002727   | 0.24481726 | 0.244502906 | 0.485821147 |
| cg12636882 | HTT        | 4  | 0.00436875 | 0.54851888 | 0.557994744 | 0.663739116 |
| cg11173579 | HUNK       | 21 | 0.03856073 | 0.25374955 | 0.228064436 | 0.36477693  |
| cg08898569 | HYLS1;HY   | 11 | 0.01477927 | 0.29129059 | 0.340699677 | 0.461127134 |
| cg11962566 | HYOU1;H    | 11 | 0.00521564 | 0.24291754 | 0.242401741 | 0.361089682 |
| cg21901386 | ICAM3      | 19 | 0.00525399 | 0.65193937 | 0.6606444   | 0.769711438 |
| cg03065308 | IFNGR1     | 6  | 0.00159903 | 0.21491809 | 0.245052277 | 0.416001453 |
| cg02102832 | IFT140     | 16 | 0.00225589 | 0.50667503 | 0.53836451  | 0.740869714 |
| cg08006309 | IFT140;TM  | 16 | 0.02135859 | 0.46630586 | 0.48250469  | 0.629120883 |
| cg02307681 | IFT140;TM  | 16 | 0.00474032 | 0.22457559 | 0.194241478 | 0.339694469 |
| cg08880369 | IFT140;TM  | 16 | 0.00109399 | 0.49239306 | 0.46536765  | 0.61900497  |
| cg07994487 | IFT140;TM  | 16 | 0.00092056 | 0.49571079 | 0.449758456 | 0.716799057 |
| cg03204177 | IFT81;IFT: | 12 | 0.00285259 | 0.58122168 | 0.592696794 | 0.719635772 |
| cg12544411 | IGDCC3     | 15 | 0.01095648 | 0.51608323 | 0.523436749 | 0.663020263 |
| cg24676120 | IGF1;IGF1  | 12 | 0.0122594  | 0.2057463  | 0.195822513 | 0.357186664 |
| cg20388729 | IGF1R      | 15 | 0.00127427 | 0.53575747 | 0.585359971 | 0.738713187 |
| cg02350767 | IGF1R      | 15 | 0.0021194  | 0.56523009 | 0.672997447 | 0.776748815 |



|            |             |    |            |            |             |             |
|------------|-------------|----|------------|------------|-------------|-------------|
| cg03795574 | IGF1R       | 15 | 0.00855749 | 0.42413629 | 0.522498248 | 0.636167502 |
| cg12402183 | IGF1R       | 15 | 0.00073118 | 0.1694267  | 0.250464695 | 0.463350809 |
| cg05075416 | IGF1R       | 15 | 0.00525399 | 0.45663169 | 0.456120899 | 0.602123656 |
| cg20966754 | IGF2BP1;I   | 17 | 0.01093065 | 0.20102945 | 0.185665658 | 0.323629144 |
| cg12754982 | IGF2R       | 6  | 0.00149088 | 0.45612058 | 0.47382497  | 0.5943362   |
| cg15096505 | IL10        | 1  | 0.0018234  | 0.15522726 | 0.171250984 | 0.336308626 |
| cg27292389 | IL15RA;IL   | 10 | 0.00168532 | 0.49383637 | 0.537856084 | 0.726622865 |
| cg25580782 | IL15RA;IL   | 10 | 0.00371278 | 0.21287206 | 0.22489225  | 0.408842343 |
| cg05042034 | IL16        | 15 | 0.01154548 | 0.37712138 | 0.42127211  | 0.550857658 |
| cg14899065 | IL16;IL16   | 15 | 0.02559062 | 0.2574201  | 0.302751093 | 0.46761329  |
| cg14898127 | IL16;IL16;  | 15 | 0.01910705 | 0.59234431 | 0.546857335 | 0.699777228 |
| cg05860978 | IL17B       | 5  | 0.00164763 | 0.31950662 | 0.359658262 | 0.480543388 |
| cg03876697 | IL17B       | 5  | 0.0009934  | 0.41706518 | 0.436266587 | 0.555109636 |
| cg24394667 | IL1RL2      | 2  | 0.00165724 | 0.37407082 | 0.425423794 | 0.586466018 |
| cg12377972 | IL4;IL4;IL4 | 5  | 0.01123326 | 0.59231322 | 0.607688673 | 0.71420414  |
| cg07998387 | IL6         | 7  | 0.0059365  | 0.43154544 | 0.435907629 | 0.57733547  |
| cg05893902 | IMPG2       | 3  | 0.0460244  | 0.51224706 | 0.506714527 | 0.665824755 |
| cg26122413 | INF2;INF2   | 14 | 0.00173267 | 0.4864541  | 0.391353911 | 0.657261931 |
| cg05132222 | INO80       | 15 | 0.00288962 | 0.27551825 | 0.299060247 | 0.450137189 |
| cg16469046 | INPP4A;IN   | 2  | 0.01092901 | 0.27127871 | 0.325070058 | 0.476312647 |
| cg18455616 | INPP4A;IN   | 2  | 0.02025944 | 0.33271721 | 0.371659721 | 0.475355805 |
| cg01169610 | INPP4A;IN   | 2  | 0.0051754  | 0.476646   | 0.447406865 | 0.618780521 |
| cg10773526 | INPP4B;IN   | 4  | 0.00141131 | 0.58622487 | 0.600800549 | 0.729150705 |
| cg12501287 | INPP5A      | 10 | 0.04006803 | 0.45854761 | 0.577763999 | 0.765673635 |
| cg07249433 | INPP5A      | 10 | 0.02957954 | 0.41471099 | 0.402416559 | 0.537741802 |
| cg02836764 | INPP5A      | 10 | 0.00156239 | 0.57978233 | 0.67977027  | 0.787663235 |
| cg18121190 | INPP5A      | 10 | 0.00207081 | 0.44616819 | 0.448058982 | 0.574157523 |
| cg02668055 | INPP5A      | 10 | 0.00218799 | 0.21975004 | 0.234271701 | 0.353100095 |
| cg12449716 | INPP5A      | 10 | 0.00073378 | 0.44789551 | 0.516242657 | 0.703257021 |
| cg05736824 | INPP5A      | 10 | 0.02878476 | 0.68287956 | 0.73351676  | 0.838883653 |
| cg21140843 | INPP5K;IN   | 17 | 0.0016682  | 0.21252131 | 0.232199773 | 0.416910071 |
| cg20720680 | INPPL1      | 11 | 0.0048909  | 0.26614348 | 0.255372787 | 0.406832741 |
| cg06399933 | INSC        | 11 | 0.01276611 | 0.19890864 | 0.147593391 | 0.305708711 |
| cg06049367 | INSC;INSC   | 11 | 0.00113577 | 0.21956523 | 0.259737935 | 0.452133085 |
| cg20523653 | INSC;INSC   | 11 | 0.00420965 | 0.14611621 | 0.149450466 | 0.286717569 |
| cg09779027 | INSR;INSF   | 19 | 0.00830906 | 0.19257784 | 0.187010017 | 0.323586773 |
| cg16926712 | INTS9;INT   | 8  | 0.00279455 | 0.1420104  | 0.125992328 | 0.24564112  |
| cg13577194 | IPPK        | 9  | 0.00118326 | 0.5110092  | 0.422185484 | 0.672266898 |
| cg14255700 | IPPK        | 9  | 0.00140443 | 0.27430685 | 0.224751447 | 0.49567257  |
| cg04919592 | IQCE;IQCI   | 7  | 0.00104452 | 0.23595052 | 0.292616637 | 0.408020521 |
| cg16686273 | IQCE;IQCI   | 7  | 0.00679946 | 0.28496525 | 0.264251332 | 0.476215356 |
| cg08494871 | IQCK        | 16 | 0.00729536 | 0.24445121 | 0.269894183 | 0.379522528 |
| cg18459152 | IQGAP2      | 5  | 0.00276743 | 0.48202317 | 0.457455686 | 0.678924692 |
| cg02109605 | IQSEC1      | 3  | 0.00302287 | 0.12498083 | 0.117057435 | 0.23496604  |
| cg24380053 | IQSEC1      | 3  | 0.00220808 | 0.21488885 | 0.203778805 | 0.438188081 |
| cg16192821 | IQSEC1      | 3  | 0.00328917 | 0.15291255 | 0.135662701 | 0.263959292 |

|            |           |    |            |            |             |             |
|------------|-----------|----|------------|------------|-------------|-------------|
| cg18000764 | IQSEC1;IC | 3  | 0.00524492 | 0.6471606  | 0.627707213 | 0.749272188 |
| cg17554647 | IQSEC1;IC | 3  | 0.00139627 | 0.12162884 | 0.128276349 | 0.299597415 |
| cg22016995 | IRF7;IRF7 | 11 | 0.0052016  | 0.31332115 | 0.297364082 | 0.422514837 |
| cg00305996 | IRS1      | 2  | 0.00298049 | 0.14756126 | 0.14476566  | 0.29203113  |
| cg00912573 | IRS1      | 2  | 0.00217555 | 0.28045647 | 0.301818176 | 0.469058946 |
| cg14283647 | IRS1      | 2  | 0.00092643 | 0.25261948 | 0.302050023 | 0.501956643 |
| cg04129548 | IRS1      | 2  | 0.00114056 | 0.21661866 | 0.262802396 | 0.399165652 |
| cg13008631 | IRS1      | 2  | 0.00120091 | 0.27524807 | 0.335793147 | 0.458023933 |
| cg06462663 | ISYNA1;IS | 19 | 0.02957954 | 0.75688406 | 0.754291476 | 0.858095327 |
| cg24935345 | ITGA1     | 5  | 0.00798815 | 0.57010686 | 0.548923575 | 0.730223604 |
| cg15638366 | ITGA6;ITC | 2  | 0.03908908 | 0.19656017 | 0.229814127 | 0.349879527 |
| cg03013554 | ITGB2;ITC | 21 | 0.0071433  | 0.43716849 | 0.436649174 | 0.564571319 |
| cg05742728 | ITGB2;ITC | 21 | 0.00504019 | 0.54887883 | 0.603821093 | 0.734656806 |
| cg13613634 | ITGB6     | 2  | 0.01163705 | 0.65703592 | 0.658020418 | 0.782783683 |
| cg15889057 | ITGB7     | 12 | 0.00854289 | 0.53652917 | 0.506189751 | 0.65015763  |
| cg07464094 | ITIH3     | 3  | 0.00107365 | 0.43534979 | 0.44568419  | 0.554490316 |
| cg18994033 | ITM2C;ITI | 2  | 0.00190678 | 0.15793364 | 0.210529935 | 0.311009547 |
| cg16426321 | ITPK1;ITP | 14 | 0.00243597 | 0.53399911 | 0.575539169 | 0.695875171 |
| cg09837298 | ITPK1;ITP | 14 | 0.00158181 | 0.5910912  | 0.615612221 | 0.75146574  |
| cg05139187 | ITSN2;ITS | 2  | 0.00202314 | 0.21590409 | 0.219014336 | 0.390309538 |
| cg26005086 | JAG1      | 20 | 0.00195    | 0.35394776 | 0.312455479 | 0.536574271 |
| cg12075498 | JAK1      | 1  | 0.0191912  | 0.28636459 | 0.319709778 | 0.462707083 |
| cg05796838 | JAK3      | 19 | 0.00295991 | 0.2842239  | 0.211943806 | 0.425304279 |
| cg06493612 | JARID2    | 6  | 0.00233734 | 0.31790906 | 0.323106758 | 0.490592209 |
| cg22982811 | JAZF1     | 7  | 0.0103161  | 0.36645818 | 0.352592148 | 0.569869871 |
| cg17702455 | JAZF1     | 7  | 0.0191912  | 0.21866967 | 0.197102842 | 0.370880098 |
| cg22377814 | JAZF1     | 7  | 0.01149175 | 0.46188367 | 0.496634712 | 0.629874597 |
| cg17052756 | JAZF1     | 7  | 0.00083228 | 0.50121591 | 0.548987778 | 0.676676182 |
| cg07128233 | JMJD1C    | 10 | 0.00144359 | 0.60884741 | 0.609390048 | 0.761249946 |
| cg19495650 | JMJD1C    | 10 | 0.00803433 | 0.24358371 | 0.273387245 | 0.380228776 |
| cg13038025 | JMJD7-PL  | 15 | 0.00152988 | 0.45997687 | 0.42510346  | 0.587724956 |
| cg00409260 | JRK;JRK   | 8  | 0.01661249 | 0.20919625 | 0.233012002 | 0.341304699 |
| cg06690085 | KALRN;K/  | 3  | 0.00073118 | 0.0764574  | 0.110487889 | 0.212790083 |
| cg14688451 | KALRN;K/  | 3  | 0.00244246 | 0.24959324 | 0.210645774 | 0.417726514 |
| cg07949011 | KANK4     | 1  | 0.01630619 | 0.19692544 | 0.183383432 | 0.308548388 |
| cg06133771 | KATNB1    | 16 | 0.00747631 | 0.38312593 | 0.424000122 | 0.561246201 |
| cg25731943 | KCNAB1;I  | 3  | 0.00154265 | 0.15767177 | 0.154693962 | 0.290892926 |
| cg15731035 | KCNAB2;I  | 1  | 0.01135963 | 0.49884191 | 0.534312048 | 0.6397901   |
| cg13377102 | KCNAB3    | 17 | 0.01076929 | 0.32522993 | 0.286022139 | 0.44262788  |
| cg21017569 | KCNAB3    | 17 | 0.02143961 | 0.330596   | 0.311034263 | 0.475987452 |
| cg13407335 | KCNAB3    | 17 | 0.04052436 | 0.25165561 | 0.200847156 | 0.357810695 |
| cg01323777 | KCNAB3    | 17 | 0.02417619 | 0.21691678 | 0.185655089 | 0.325764704 |
| cg24006352 | KCND3;K/  | 1  | 0.0225065  | 0.26733257 | 0.299107767 | 0.43324458  |
| cg26736645 | KCNE1;KC  | 21 | 0.00401283 | 0.55383962 | 0.548372565 | 0.698063352 |
| cg05591210 | KCNE3     | 11 | 0.00649    | 0.47572712 | 0.502739214 | 0.632644345 |
| cg15510325 | KCNH2;K/  | 7  | 0.00472916 | 0.65043732 | 0.639268448 | 0.758920864 |

|            |          |    |            |            |             |             |
|------------|----------|----|------------|------------|-------------|-------------|
| cg00948250 | KCNJ10   | 1  | 0.04649715 | 0.32945538 | 0.327716843 | 0.45784089  |
| cg03746851 | KCNJ12   | 17 | 0.00566397 | 0.32979469 | 0.350347463 | 0.464540632 |
| cg10222534 | KCNJ14;K | 19 | 0.00890116 | 0.2675394  | 0.192926011 | 0.404846062 |
| cg21388745 | KCNK5    | 6  | 0.00160732 | 0.27657768 | 0.365282861 | 0.542658111 |
| cg19427642 | KCNMA1;  | 10 | 0.00626821 | 0.38487915 | 0.384418607 | 0.578685753 |
| cg07210187 | KCNMA1;  | 10 | 0.00968951 | 0.30765385 | 0.269955583 | 0.453196918 |
| cg07029975 | KCNMA1;  | 10 | 0.02897628 | 0.48573955 | 0.476693975 | 0.625945306 |
| cg12614113 | KCNMA1;  | 10 | 0.00488723 | 0.36767821 | 0.376396286 | 0.593885197 |
| cg24529771 | KCNMB3;  | 3  | 0.01921828 | 0.3253716  | 0.264870893 | 0.431850561 |
| cg13396821 | KCNN3;K  | 1  | 0.00247251 | 0.20661065 | 0.202948753 | 0.389248042 |
| cg26504422 | KCNN4    | 19 | 0.00169037 | 0.31156892 | 0.323341774 | 0.615301682 |
| cg22904711 | KCNN4    | 19 | 0.00158899 | 0.19262973 | 0.200714334 | 0.350442983 |
| cg19388050 | KCNQ1;K  | 11 | 0.00336646 | 0.6316296  | 0.607822292 | 0.73319745  |
| cg06960356 | KCNQ1;K  | 11 | 0.00140062 | 0.31176051 | 0.299640985 | 0.444014861 |
| cg24725201 | KCNQ1;K  | 11 | 0.0012838  | 0.57810987 | 0.580649373 | 0.687314185 |
| cg15686157 | KCNQ1;K  | 11 | 0.002153   | 0.2499726  | 0.288569895 | 0.389038204 |
| cg04907802 | KCNQ1;K  | 11 | 0.00141191 | 0.49317578 | 0.548078574 | 0.754287441 |
| cg08376310 | KCNQ1;K  | 11 | 0.00319723 | 0.2214569  | 0.246198752 | 0.391866027 |
| cg13880539 | KCNQ1;K  | 11 | 0.01068658 | 0.23746367 | 0.190844323 | 0.365981207 |
| cg15861694 | KCNQ1;K  | 11 | 0.003299   | 0.50222641 | 0.509572201 | 0.61153742  |
| cg19672982 | KCNQ1;K  | 11 | 0.00263491 | 0.42066899 | 0.432320563 | 0.56768448  |
| cg14245619 | KCNQ2;K  | 20 | 0.00986554 | 0.41085848 | 0.391705016 | 0.529367134 |
| cg07338584 | KCNU1    | 8  | 0.01390151 | 0.21754803 | 0.226273057 | 0.344875776 |
| cg10646179 | KCTD16   | 5  | 0.04127719 | 0.27875104 | 0.313757864 | 0.4525372   |
| cg02969426 | KCTD4;G  | 13 | 0.00065949 | 0.21360523 | 0.349596109 | 0.455025975 |
| cg01080424 | KDEL2;K  | 7  | 0.00250718 | 0.26379125 | 0.191436229 | 0.428205492 |
| cg01640635 | KDEL3;K  | 22 | 0.0091896  | 0.2162057  | 0.173490871 | 0.327137327 |
| cg21166985 | KDM2B;K  | 12 | 0.00315788 | 0.22025977 | 0.199664298 | 0.385215577 |
| cg06646494 | KDM2B;K  | 12 | 0.00125104 | 0.40374206 | 0.403020892 | 0.507740764 |
| cg06024930 | KDM2B;K  | 12 | 0.00317234 | 0.32825816 | 0.341851418 | 0.469219094 |
| cg11724984 | KDM2B;K  | 12 | 0.00067554 | 0.53619615 | 0.573885493 | 0.717207412 |
| cg16062733 | KDM2B;K  | 12 | 0.00118039 | 0.22986308 | 0.298425237 | 0.472581333 |
| cg25482146 | KDM2B;K  | 12 | 0.00099652 | 0.28256568 | 0.279294996 | 0.448318863 |
| cg00946598 | KDM4A    | 1  | 0.00262173 | 0.44442997 | 0.437209448 | 0.588599357 |
| cg02577963 | KDM4B    | 19 | 0.00112679 | 0.38725658 | 0.387312457 | 0.548707944 |
| cg03358468 | KDM4B    | 19 | 0.00388972 | 0.35213902 | 0.464744555 | 0.629443123 |
| cg22079102 | KDM4B    | 19 | 0.00341932 | 0.37520312 | 0.419027611 | 0.540808514 |
| cg20098875 | KDM4B    | 19 | 0.00864245 | 0.6051626  | 0.564332329 | 0.729374877 |
| cg15705062 | KDM4B    | 19 | 0.00133856 | 0.67313552 | 0.658068095 | 0.797822144 |
| cg03310779 | KDM4B    | 19 | 0.00299024 | 0.57688679 | 0.550529874 | 0.69723205  |
| cg02842850 | KDM4B    | 19 | 0.00524492 | 0.30296598 | 0.280614368 | 0.442532019 |
| cg10821320 | KDM4B    | 19 | 0.00666067 | 0.57816917 | 0.584824692 | 0.719753171 |
| cg14438634 | KDM4C;K  | 9  | 0.01980843 | 0.69224776 | 0.676919718 | 0.807476634 |
| cg01586432 | KEAP1;KE | 19 | 0.01075636 | 0.19632227 | 0.183037671 | 0.372342754 |
| cg05441854 | KIAA0182 | 16 | 0.00116059 | 0.31986054 | 0.36640869  | 0.473178994 |
| cg05245094 | KIAA0182 | 16 | 0.00420965 | 0.61667876 | 0.655240735 | 0.764738102 |

|            |           |    |            |            |             |             |
|------------|-----------|----|------------|------------|-------------|-------------|
| cg00168118 | KIAA0182  | 16 | 0.00280849 | 0.29831985 | 0.300690821 | 0.444211698 |
| cg26657404 | KIAA0182  | 16 | 0.00186737 | 0.32237852 | 0.313139583 | 0.538420347 |
| cg08899895 | KIAA0182  | 16 | 0.00183351 | 0.19816254 | 0.191193664 | 0.300883268 |
| cg22455529 | KIAA0195  | 17 | 0.00129968 | 0.27908977 | 0.302136419 | 0.50030741  |
| cg27089714 | KIAA019C  | 8  | 0.04813395 | 0.50088573 | 0.47796775  | 0.606621113 |
| cg25289457 | KIAA024C  | 6  | 0.00584178 | 0.26802445 | 0.204983973 | 0.405229804 |
| cg03505866 | KIAA0247  | 14 | 0.00144775 | 0.27485193 | 0.271715178 | 0.46797677  |
| cg27260684 | KIAA0513  | 16 | 0.02595684 | 0.54734802 | 0.588844697 | 0.697121346 |
| cg06407371 | KIAA0513  | 16 | 0.00657278 | 0.26352419 | 0.306969741 | 0.43500771  |
| cg18618674 | KIAA052E  | 12 | 0.00126804 | 0.83318762 | 0.85560071  | 0.968053306 |
| cg27498545 | KIAA0802  | 18 | 0.00233476 | 0.46482041 | 0.528371299 | 0.673480333 |
| cg17226446 | KIAA0922  | 4  | 0.00070134 | 0.20245833 | 0.291000571 | 0.470428288 |
| cg15733729 | KIAA102C  | 1  | 0.00074381 | 0.42299336 | 0.540951103 | 0.675542913 |
| cg12380772 | KIAA1161  | 9  | 0.00113577 | 0.16795945 | 0.213787476 | 0.329672599 |
| cg22192454 | KIAA1267  | 17 | 0.00428303 | 0.58386058 | 0.616026665 | 0.735488684 |
| cg13732302 | KIAA1267  | 17 | 0.00144365 | 0.3985657  | 0.468628537 | 0.589082512 |
| cg17239876 | KIAA1274  | 10 | 0.0118868  | 0.25239703 | 0.265598894 | 0.427024079 |
| cg24775327 | KIAA1274  | 10 | 0.01378915 | 0.30701178 | 0.300113731 | 0.499992144 |
| cg18295923 | KIAA140C  | 14 | 0.0108413  | 0.4794472  | 0.464065558 | 0.587379571 |
| cg19603836 | KIAA1462  | 10 | 0.00303542 | 0.48464284 | 0.505791992 | 0.67041616  |
| cg13661330 | KIAA1462  | 10 | 0.00295256 | 0.5012803  | 0.494282356 | 0.638393146 |
| cg11197101 | KIAA1522  | 1  | 0.00840111 | 0.08852181 | 0.090650529 | 0.198755389 |
| cg16007395 | KIAA1522  | 1  | 0.00113577 | 0.50813486 | 0.539997776 | 0.679501243 |
| cg12478578 | KIAA1522  | 1  | 0.00205947 | 0.41785485 | 0.450534529 | 0.660063198 |
| cg09804503 | KIAA1522  | 1  | 0.04315457 | 0.31402241 | 0.334253375 | 0.44644518  |
| cg04892182 | KIAA1522  | 1  | 0.00426288 | 0.24032538 | 0.250037183 | 0.437263972 |
| cg00528191 | KIAA1522  | 1  | 0.00556574 | 0.44191514 | 0.412988308 | 0.552557431 |
| cg04173688 | KIAA153C  | 4  | 0.00745107 | 0.68521487 | 0.661332802 | 0.801501824 |
| cg21182616 | KIAA153C  | 4  | 0.04151822 | 0.49831433 | 0.422141552 | 0.617886053 |
| cg00395625 | KIAA154C  | 7  | 0.01860545 | 0.18381679 | 0.165767127 | 0.329201979 |
| cg09510085 | KIAA160C  | 16 | 0.02729523 | 0.5109042  | 0.447768613 | 0.625342451 |
| cg04132007 | KIAA168E  | 8  | 0.00620309 | 0.68110373 | 0.692851979 | 0.818892756 |
| cg26426395 | KIDINS22  | 2  | 0.036552   | 0.2174721  | 0.182067396 | 0.367141089 |
| cg23977002 | KIDINS22  | 2  | 0.00087577 | 0.56008494 | 0.585517233 | 0.784452308 |
| cg09888753 | KIF13B    | 8  | 0.0011206  | 0.49792336 | 0.512948598 | 0.690733505 |
| cg17876641 | KIF21B    | 1  | 0.00097946 | 0.48904693 | 0.495642879 | 0.628549586 |
| cg04257913 | KIF26A    | 14 | 0.02775429 | 0.45714435 | 0.430665668 | 0.575296125 |
| cg26186408 | KIF2A;KIF | 5  | 0.01782206 | 0.51379696 | 0.563493966 | 0.667289631 |
| cg24588468 | KIF3C     | 2  | 0.0472398  | 0.79914366 | 0.553662666 | 0.688600562 |
| cg23186534 | KIF5A     | 12 | 0.03795947 | 0.46385718 | 0.475840926 | 0.603549934 |
| cg11597157 | KIF7      | 15 | 0.00288962 | 0.62400337 | 0.603298285 | 0.737030297 |
| cg02161701 | KIF7      | 15 | 0.00166784 | 0.46892731 | 0.499084789 | 0.672864376 |
| cg00917156 | KIFC3;KIF | 16 | 0.00327239 | 0.27596451 | 0.291952475 | 0.432975313 |
| cg04445570 | KIRREL3;h | 11 | 0.00380612 | 0.55512678 | 0.59062784  | 0.710028186 |
| cg07140250 | KLC1;KLC  | 14 | 0.02001759 | 0.4635219  | 0.454685485 | 0.579506291 |
| cg05647197 | KLF11     | 2  | 0.02001759 | 0.34289519 | 0.344302266 | 0.47216532  |

|            |          |    |            |            |             |             |
|------------|----------|----|------------|------------|-------------|-------------|
| cg00540067 | KLF15    | 3  | 0.00798815 | 0.18302563 | 0.185575606 | 0.289406092 |
| cg02668248 | KLF2     | 19 | 0.00270297 | 0.27265528 | 0.213841674 | 0.378146977 |
| cg12251895 | KLF7     | 2  | 0.01783758 | 0.29670628 | 0.287468396 | 0.435156107 |
| cg01304993 | KLHDC4   | 16 | 0.00442346 | 0.44523474 | 0.489873036 | 0.596271406 |
| cg11705699 | KLHDC4   | 16 | 0.01039926 | 0.68151484 | 0.72287405  | 0.82792313  |
| cg09821701 | KLHDC4   | 16 | 0.00275824 | 0.14697107 | 0.163964679 | 0.271604096 |
| cg08356614 | KLHDC5   | 12 | 0.00713936 | 0.34659803 | 0.343674635 | 0.478033811 |
| cg09502111 | KLHDC8A  | 1  | 0.00124243 | 0.55831991 | 0.58287508  | 0.746282837 |
| cg00058923 | KLHDC9;k | 1  | 0.00298275 | 0.49386289 | 0.487239455 | 0.64784746  |
| cg04359978 | KLHL17   | 1  | 0.00113844 | 0.23364111 | 0.23494831  | 0.351513794 |
| cg26635367 | KLHL2;KL | 4  | 0.00183809 | 0.22595457 | 0.200820155 | 0.422464868 |
| cg01120851 | KLHL21   | 1  | 0.00272772 | 0.70346673 | 0.726233022 | 0.836043105 |
| cg06371489 | KLHL25   | 15 | 0.0048909  | 0.50338025 | 0.506910729 | 0.632819196 |
| cg24215531 | KLHL26   | 19 | 0.00147208 | 0.25540679 | 0.278320116 | 0.379893243 |
| cg27297315 | KLHL29   | 2  | 0.00435059 | 0.34881603 | 0.399305541 | 0.511655282 |
| cg03445244 | KLHL29   | 2  | 0.00152273 | 0.28078626 | 0.317757462 | 0.531067232 |
| cg00854172 | KLHL29   | 2  | 0.00218837 | 0.14149144 | 0.130906503 | 0.325613733 |
| cg14551881 | KLHL29   | 2  | 0.00107365 | 0.18644866 | 0.219598696 | 0.355767316 |
| cg06676049 | KLHL29   | 2  | 0.00548794 | 0.26444715 | 0.266046398 | 0.393778337 |
| cg17245125 | KLHL29   | 2  | 0.00247655 | 0.29636489 | 0.29771829  | 0.402591008 |
| cg00746446 | KLHL29   | 2  | 0.00245827 | 0.50979998 | 0.530643738 | 0.691632092 |
| cg10982443 | KLHL33   | 14 | 0.01372997 | 0.20608477 | 0.160581882 | 0.318875363 |
| cg03946012 | KLKBL4   | 16 | 0.03035371 | 0.24635472 | 0.264579035 | 0.365631504 |
| cg03404742 | KLKBL4;C | 16 | 0.01535397 | 0.37724694 | 0.325178359 | 0.485878971 |
| cg15241779 | KLRD1;KL | 12 | 0.00168532 | 0.53065105 | 0.601130057 | 0.754957696 |
| cg01940139 | KLRD1;KL | 12 | 0.00554761 | 0.30191686 | 0.310345857 | 0.534697202 |
| cg04468334 | KRBA1    | 7  | 0.00073265 | 0.42745886 | 0.473750471 | 0.609220155 |
| cg21336116 | KRT23;KR | 17 | 0.01399795 | 0.19166283 | 0.163779944 | 0.354946709 |
| cg24340657 | KRT24    | 17 | 0.01405386 | 0.31106406 | 0.314493617 | 0.418084666 |
| cg05138546 | KRT36    | 17 | 0.02414773 | 0.65278893 | 0.542029788 | 0.767100372 |
| cg05762338 | KRTAP1-5 | 17 | 0.00574659 | 0.38403405 | 0.360024399 | 0.563922643 |
| cg15322542 | KRTAP17- | 17 | 0.0181634  | 0.22837019 | 0.214370469 | 0.330715369 |
| cg12188197 | KRTAP2-4 | 17 | 0.02601271 | 0.33868571 | 0.331224378 | 0.462774153 |
| cg17158414 | KRTCAP3; | 2  | 0.02089413 | 0.33692245 | 0.332594581 | 0.458439905 |
| cg02592271 | KRTCAP3; | 2  | 0.00441677 | 0.29378426 | 0.316752371 | 0.427852284 |
| cg20102877 | KRTCAP3; | 2  | 0.00317338 | 0.30271201 | 0.315172502 | 0.456711176 |
| cg18428193 | KRTCAP3; | 2  | 0.00953692 | 0.29583562 | 0.299175734 | 0.403685435 |
| cg19826115 | KYNU;KYI | 2  | 0.04769493 | 0.34772309 | 0.39942327  | 0.529641951 |
| cg19421125 | LAG3     | 12 | 0.00097337 | 0.08664671 | 0.116223143 | 0.228857433 |
| cg10191002 | LAG3     | 12 | 0.00144772 | 0.1779051  | 0.226492988 | 0.347556189 |
| cg23613317 | LARP1    | 5  | 0.0058315  | 0.13939488 | 0.131063688 | 0.244303568 |
| cg02639667 | LARP1    | 5  | 0.00245827 | 0.3293151  | 0.313980552 | 0.49183881  |
| cg16645907 | LARP1    | 5  | 0.00150566 | 0.174986   | 0.188533783 | 0.31666753  |
| cg03519907 | LARP1    | 5  | 0.00279775 | 0.14481219 | 0.158688648 | 0.273345415 |
| cg13689073 | LARP1    | 5  | 0.00262867 | 0.12441693 | 0.136586979 | 0.318634934 |
| cg04180113 | LARP4B   | 10 | 0.03209984 | 0.53994607 | 0.562037111 | 0.663561691 |

|            |           |    |            |            |             |             |
|------------|-----------|----|------------|------------|-------------|-------------|
| cg05380759 | LARS2     | 3  | 0.00066232 | 0.10508438 | 0.160306129 | 0.278094402 |
| cg01716603 | LASP1     | 17 | 0.02155924 | 0.34664773 | 0.30186037  | 0.458405254 |
| cg26803993 | LASS6     | 2  | 0.00841172 | 0.59209391 | 0.577856487 | 0.721068299 |
| cg09045552 | LASS6     | 2  | 0.00065949 | 0.60635796 | 0.701246008 | 0.803602819 |
| cg27053177 | LASS6     | 2  | 0.00527173 | 0.22177585 | 0.220359766 | 0.507155997 |
| cg27409974 | LATS1     | 6  | 0.00186737 | 0.43960252 | 0.439997888 | 0.597592744 |
| cg26525870 | LAYN      | 11 | 0.00248026 | 0.47525564 | 0.472369605 | 0.643495415 |
| cg19534945 | LCN12     | 9  | 0.03359449 | 0.3928184  | 0.408924629 | 0.541855489 |
| cg17607330 | LDHA;LDI  | 11 | 0.00422785 | 0.36116922 | 0.413758497 | 0.524809497 |
| cg19002462 | LDLRAD3   | 11 | 0.02188973 | 0.14854454 | 0.148372056 | 0.258023467 |
| cg15108490 | LDLRAD3   | 11 | 0.00317234 | 0.20203848 | 0.209681139 | 0.353249352 |
| cg16943934 | LDLRAD3   | 11 | 0.036396   | 0.40692342 | 0.400930552 | 0.537094335 |
| cg26597485 | LDLRAD3   | 11 | 0.00196334 | 0.15724047 | 0.155594266 | 0.37057755  |
| cg06359931 | LDLRAP1   | 1  | 0.00510852 | 0.37113167 | 0.321106232 | 0.487454593 |
| cg12565679 | LECT2     | 5  | 0.01045915 | 0.2316458  | 0.246632889 | 0.447867267 |
| cg03607891 | LEPR;LEPI | 1  | 0.03409516 | 0.37150613 | 0.394359359 | 0.501762677 |
| cg18968278 | LETM1     | 4  | 0.02773862 | 0.34451427 | 0.374962516 | 0.49892946  |
| cg16500874 | LETM1     | 4  | 0.00187837 | 0.53674409 | 0.501454127 | 0.672544531 |
| cg08824221 | LGR4      | 11 | 0.01311783 | 0.19184522 | 0.1631954   | 0.322141886 |
| cg16964946 | LGR4      | 11 | 0.04790527 | 0.36891111 | 0.352620585 | 0.516356669 |
| cg23586835 | LGR4      | 11 | 0.01613643 | 0.67267755 | 0.690356592 | 0.794857603 |
| cg17707870 | LHFP      | 13 | 0.00480767 | 0.05756945 | 0.078102053 | 0.244286213 |
| cg03499943 | LHPP;LHP  | 10 | 0.00126804 | 0.38109664 | 0.396223941 | 0.55086183  |
| cg09690597 | LHPP;LHP  | 10 | 0.00461558 | 0.23124937 | 0.178686044 | 0.343342968 |
| cg26284388 | LHPP;LHP  | 10 | 0.02514684 | 0.34420875 | 0.3288319   | 0.525491235 |
| cg17995557 | LHPP;LHP  | 10 | 0.00280852 | 0.19817578 | 0.187563254 | 0.459288411 |
| cg04949429 | LHPP;LHP  | 10 | 0.01729366 | 0.2433768  | 0.261738586 | 0.411401864 |
| cg21390852 | LHPP;LHP  | 10 | 0.0108413  | 0.20763774 | 0.190683219 | 0.309802093 |
| cg18593374 | LHPP;LHP  | 10 | 0.01342633 | 0.26374904 | 0.244987061 | 0.386579015 |
| cg14496753 | LHX6;LHX  | 9  | 0.00820507 | 0.2669558  | 0.217753614 | 0.379436747 |
| cg14476745 | LHX6;LHX  | 9  | 0.01616965 | 0.25735063 | 0.226982337 | 0.360274378 |
| cg01578293 | LIMCH1;L  | 4  | 0.00335972 | 0.51586914 | 0.571102963 | 0.701248505 |
| cg23291145 | LIMCH1;L  | 4  | 0.00241261 | 0.30973709 | 0.267931997 | 0.449770634 |
| cg23825522 | LIMD1     | 3  | 0.00298225 | 0.14222465 | 0.117122926 | 0.340191459 |
| cg00225067 | LIMD1     | 3  | 0.00485896 | 0.13968534 | 0.142904446 | 0.307833202 |
| cg01942372 | LIMS1     | 2  | 0.00224325 | 0.41722446 | 0.500123693 | 0.642054591 |
| cg23528975 | LIMS2;GP  | 2  | 0.00499353 | 0.6281791  | 0.648174785 | 0.777442141 |
| cg18044111 | LIMS2;LIM | 2  | 0.00184403 | 0.2846615  | 0.280488821 | 0.404959781 |
| cg21869609 | LINGO3    | 19 | 0.00796638 | 0.25073848 | 0.211797905 | 0.375293541 |
| cg09370594 | LINGO3    | 19 | 0.00287058 | 0.38189367 | 0.364640301 | 0.484322955 |
| cg09610311 | LIPC      | 15 | 0.00570747 | 0.38512244 | 0.348047492 | 0.490079865 |
| cg01891736 | LITAF;LIT | 16 | 0.00739749 | 0.2718769  | 0.294417858 | 0.419301526 |
| cg06461408 | LLGL2;LLC | 17 | 0.01661249 | 0.46399376 | 0.469422128 | 0.591927251 |
| cg26289155 | LLGL2;LLC | 17 | 0.01074953 | 0.56091012 | 0.53274702  | 0.674223265 |
| cg08972916 | LLGL2;LLC | 17 | 0.01039075 | 0.3528465  | 0.399731915 | 0.532980639 |
| cg01707127 | LMF1      | 16 | 0.00624955 | 0.19031227 | 0.183500535 | 0.302987149 |

|            |          |    |            |            |             |             |
|------------|----------|----|------------|------------|-------------|-------------|
| cg10244976 | LMF1     | 16 | 0.00252124 | 0.22176222 | 0.211700591 | 0.348061739 |
| cg16515546 | LMF1     | 16 | 0.001223   | 0.4229095  | 0.457919244 | 0.63003543  |
| cg17408637 | LMO2;LM  | 11 | 0.0086408  | 0.28897932 | 0.306424385 | 0.432639293 |
| cg06529818 | LOC1001: | 1  | 0.00432931 | 0.23165567 | 0.210125763 | 0.358602519 |
| cg01624637 | LOC1001: | 16 | 0.00255186 | 0.4380171  | 0.465357934 | 0.626754448 |
| cg03579904 | LOC1001: | 16 | 0.00228672 | 0.54388977 | 0.580642723 | 0.687473332 |
| cg06908618 | LOC1001: | 16 | 0.00414415 | 0.27907058 | 0.286228562 | 0.487837228 |
| cg03059126 | LOC1001: | 1  | 0.01332118 | 0.48415037 | 0.425815598 | 0.621949039 |
| cg02694925 | LOC1001: | 18 | 0.04046963 | 0.44070809 | 0.345110344 | 0.581786625 |
| cg21987921 | LOC1001: | 4  | 0.00143965 | 0.5130319  | 0.514092522 | 0.666708505 |
| cg02272576 | LOC1001: | 6  | 0.01980822 | 0.20398225 | 0.259168895 | 0.371625367 |
| cg09248429 | LOC1001: | 11 | 0.00218429 | 0.19303828 | 0.205205034 | 0.381801233 |
| cg04859117 | LOC1001: | 11 | 0.00161073 | 0.33016197 | 0.375162135 | 0.588022622 |
| cg18716210 | LOC1001: | 11 | 0.00275824 | 0.17481252 | 0.170471092 | 0.289212602 |
| cg20494635 | LOC1001: | 11 | 0.00206218 | 0.17322025 | 0.181052083 | 0.293265545 |
| cg24143374 | LOC1001: | 1  | 0.00211122 | 0.33313154 | 0.379226274 | 0.503302924 |
| cg04517258 | LOC1001: | 8  | 0.00140256 | 0.19528547 | 0.206688409 | 0.414087753 |
| cg18034368 | LOC1001: | 10 | 0.00735604 | 0.51601468 | 0.507259185 | 0.698235601 |
| cg03141090 | LOC1001: | 10 | 0.00244246 | 0.74999556 | 0.749166665 | 0.855843759 |
| cg23697796 | LOC1001: | 10 | 0.00814151 | 0.09256729 | 0.096832255 | 0.212673755 |
| cg19192065 | LOC1001: | 10 | 0.00151706 | 0.08770043 | 0.095956011 | 0.208655175 |
| cg00526835 | LOC1001: | 10 | 0.00427027 | 0.17344937 | 0.14762735  | 0.367217791 |
| cg03184472 | LOC1002: | 2  | 0.045184   | 0.3222152  | 0.288249377 | 0.44371279  |
| cg25308803 | LOC1002: | 2  | 0.00520958 | 0.19801925 | 0.19267986  | 0.338418592 |
| cg03846641 | LOC1002: | 2  | 0.0031673  | 0.18047143 | 0.156221964 | 0.301130932 |
| cg08390901 | LOC1002: | 2  | 0.00314038 | 0.56184857 | 0.562079843 | 0.706316081 |
| cg25265234 | LOC1003: | 3  | 0.01268304 | 0.33017707 | 0.391467334 | 0.494120307 |
| cg14892517 | LOC1003: | 2  | 0.00669348 | 0.5159675  | 0.562904433 | 0.674380427 |
| cg08611810 | LOC1003: | 2  | 0.00541343 | 0.35679616 | 0.292233407 | 0.460396051 |
| cg13356253 | LOC1003: | 2  | 0.02584059 | 0.38293138 | 0.337866459 | 0.494773634 |
| cg00735454 | LOC1218: | 13 | 0.00375919 | 0.23250088 | 0.21643871  | 0.435798249 |
| cg03826194 | LOC1218: | 13 | 0.01580038 | 0.24041425 | 0.245433255 | 0.440896259 |
| cg09287356 | LOC1219: | 13 | 0.00913085 | 0.43789091 | 0.438287755 | 0.588937695 |
| cg21247923 | LOC1219: | 13 | 0.00074801 | 0.64498258 | 0.60270337  | 0.790848929 |
| cg27053629 | LOC1454: | 14 | 0.00412512 | 0.51118418 | 0.569709312 | 0.705397032 |
| cg22793142 | LOC1486: | 1  | 0.00099274 | 0.48259037 | 0.528155402 | 0.663962905 |
| cg20426361 | LOC1506: | 2  | 0.00931288 | 0.32142927 | 0.270170584 | 0.474171005 |
| cg02969706 | LOC1506: | 2  | 0.03956605 | 0.44674403 | 0.475478374 | 0.596170341 |
| cg08348461 | LOC1511: | 2  | 0.00334886 | 0.65884404 | 0.661429147 | 0.784460462 |
| cg17028595 | LOC2830: | 10 | 0.00527173 | 0.22680629 | 0.244401884 | 0.382802136 |
| cg07580867 | LOC2830: | 10 | 0.00211122 | 0.31282955 | 0.38222542  | 0.54263408  |
| cg24288715 | LOC2857: | 6  | 0.00161073 | 0.49153285 | 0.524425413 | 0.678550073 |
| cg05885137 | LOC2859: | 7  | 0.01598314 | 0.33422853 | 0.373362548 | 0.509522552 |
| cg16415646 | LOC2859: | 7  | 0.00353865 | 0.22884042 | 0.165486248 | 0.39737646  |
| cg20487548 | LOC3395: | 20 | 0.00165724 | 0.55433386 | 0.596267647 | 0.701178422 |
| cg06811361 | LOC3999: | 11 | 0.00456818 | 0.48149561 | 0.454780676 | 0.727578867 |

|            |           |    |            |            |             |             |
|------------|-----------|----|------------|------------|-------------|-------------|
| cg00927666 | LOC40264  | 7  | 0.02050584 | 0.23321622 | 0.187472624 | 0.386567786 |
| cg14286546 | LOC44017  | 9  | 0.02120024 | 0.58346737 | 0.603153819 | 0.753104842 |
| cg00060374 | LOC44180  | 1  | 0.00556434 | 0.26739521 | 0.22099244  | 0.372167915 |
| cg18233411 | LOC55288  | 12 | 0.01541996 | 0.57902032 | 0.584063223 | 0.691821584 |
| cg02536995 | LOC55313  | 6  | 0.00336646 | 0.23057229 | 0.224996627 | 0.385546753 |
| cg00842231 | LOC55908  | 19 | 0.00094083 | 0.51578511 | 0.579591391 | 0.686022032 |
| cg04946709 | LOC64464  | 16 | 0.0266726  | 0.60142894 | 0.582551071 | 0.753693289 |
| cg13159985 | LOC64698  | 13 | 0.00067553 | 0.70345314 | 0.747523873 | 0.858288372 |
| cg20148389 | LOC64698  | 13 | 0.00182941 | 0.49531864 | 0.519909599 | 0.702526619 |
| cg08569979 | LOC64698  | 13 | 0.00143343 | 0.38359173 | 0.41204659  | 0.586548002 |
| cg11510891 | LOC64698  | 13 | 0.00085355 | 0.21155166 | 0.23212278  | 0.365089165 |
| cg13750802 | LOC64698  | 13 | 0.00314361 | 0.36718818 | 0.413776101 | 0.582472621 |
| cg16314851 | LOC72380  | 7  | 0.00323713 | 0.30395004 | 0.328176791 | 0.561041337 |
| cg09205190 | LOC72839  | 17 | 0.00488723 | 0.20081961 | 0.1823748   | 0.346086085 |
| cg09603824 | LOH3CR2   | 3  | 0.02169667 | 0.25816747 | 0.289303798 | 0.423612159 |
| cg26476173 | LONP2     | 16 | 0.03749859 | 0.23461746 | 0.229844188 | 0.362231041 |
| cg09916599 | LOXL1     | 15 | 0.00160451 | 0.53053598 | 0.482014869 | 0.654495153 |
| cg06768079 | LOXL2     | 8  | 0.00128378 | 0.41057337 | 0.429004258 | 0.66033163  |
| cg04259752 | LOXL2     | 8  | 0.00232775 | 0.2240964  | 0.222766903 | 0.347981723 |
| cg00326251 | LOXL2     | 8  | 0.00066232 | 0.28313289 | 0.343906001 | 0.457635924 |
| cg21422605 | LPAR3     | 1  | 0.00073118 | 0.32595844 | 0.375472966 | 0.517180682 |
| cg00281273 | LPCAT1    | 5  | 0.00090315 | 0.18438202 | 0.241108551 | 0.377680084 |
| cg20962974 | LPCAT1    | 5  | 0.00157567 | 0.54733591 | 0.554699217 | 0.665360863 |
| cg21656685 | LPIN2;LO  | 18 | 0.04896636 | 0.43127341 | 0.420581565 | 0.54223547  |
| cg15052335 | LPIN2;LPI | 18 | 0.00468024 | 0.32684579 | 0.391405466 | 0.524078582 |
| cg16224163 | LPP       | 3  | 0.0437543  | 0.23613134 | 0.232860262 | 0.365815388 |
| cg05048043 | LPP;LPP;L | 3  | 0.02544422 | 0.26873247 | 0.299457833 | 0.415774158 |
| cg22486630 | LPPR2;LPI | 19 | 0.00359691 | 0.46188385 | 0.476502045 | 0.628100694 |
| cg18365406 | LPPR2;LPI | 19 | 0.00309973 | 0.29458435 | 0.302780694 | 0.407851965 |
| cg08326019 | LPPR2;LPI | 19 | 0.00334886 | 0.33005961 | 0.334252859 | 0.50854481  |
| cg03729251 | LRBA      | 4  | 0.02013944 | 0.23867823 | 0.18770743  | 0.345127215 |
| cg26053346 | LRIG1     | 3  | 0.01438148 | 0.23660137 | 0.245234438 | 0.400405964 |
| cg05543520 | LRIG1     | 3  | 0.00090291 | 0.12444689 | 0.14919522  | 0.28571915  |
| cg11198596 | LRIG1     | 3  | 0.00065949 | 0.09928535 | 0.145936119 | 0.307183266 |
| cg22459236 | LRIG3;LRI | 12 | 0.00192049 | 0.47304281 | 0.45649994  | 0.694707    |
| cg14621254 | LRP1      | 12 | 0.00291542 | 0.25685257 | 0.232149476 | 0.389452648 |
| cg12832726 | LRP5      | 11 | 0.00081789 | 0.10519808 | 0.157763167 | 0.258606656 |
| cg25781963 | LRP5      | 11 | 0.02362077 | 0.41839574 | 0.419974974 | 0.574006728 |
| cg16409259 | LRP5      | 11 | 0.00180518 | 0.24135998 | 0.290474771 | 0.493408456 |
| cg13738327 | LRP5      | 11 | 0.00203531 | 0.30257116 | 0.332706809 | 0.569602067 |
| cg08648997 | LRP5      | 11 | 0.01305145 | 0.21585579 | 0.212769239 | 0.352177298 |
| cg05754939 | LRP5      | 11 | 0.00174783 | 0.23597554 | 0.241650874 | 0.402080412 |
| cg11950754 | LRP8;LRP  | 1  | 0.00079224 | 0.26008524 | 0.29646627  | 0.546420359 |
| cg04483460 | LRP8;LRP  | 1  | 0.00315365 | 0.15456359 | 0.143095602 | 0.305159444 |
| cg20389822 | LRPAP1    | 4  | 0.00606409 | 0.50597307 | 0.491420571 | 0.607974799 |
| cg20437668 | LRPAP1    | 4  | 0.00245414 | 0.66219548 | 0.682755703 | 0.795961466 |



|            |           |    |            |            |             |             |
|------------|-----------|----|------------|------------|-------------|-------------|
| cg16465012 | LRPAP1    | 4  | 0.00104158 | 0.58890357 | 0.61582592  | 0.730036173 |
| cg12174175 | LRRC1     | 6  | 0.02720807 | 0.30517081 | 0.340996688 | 0.441161652 |
| cg19091930 | LRRC14B   | 5  | 0.03352901 | 0.35721102 | 0.350562835 | 0.457343828 |
| cg01239922 | LRRC14B   | 5  | 0.00904361 | 0.1895034  | 0.180519677 | 0.304728858 |
| cg26692873 | LRRC16A   | 6  | 0.0043837  | 0.54727826 | 0.558519348 | 0.715474845 |
| cg16875182 | LRRC2;TD  | 3  | 0.00099274 | 0.2988039  | 0.360464193 | 0.479251016 |
| cg24602245 | LRRC47    | 1  | 0.00555917 | 0.44007642 | 0.445113435 | 0.611529798 |
| cg03153397 | LRRC48;L  | 17 | 0.00953692 | 0.33965791 | 0.370590295 | 0.49528698  |
| cg07566790 | LRRC48;L  | 17 | 0.00279775 | 0.25674533 | 0.280934859 | 0.426182792 |
| cg21198455 | LRRC8A;L  | 9  | 0.00117201 | 0.41877419 | 0.436557141 | 0.593265714 |
| cg14206615 | LRRC8A;L  | 9  | 0.0023323  | 0.66402073 | 0.673816153 | 0.784885666 |
| cg04550950 | LRRC8D;L  | 1  | 0.00196226 | 0.14001456 | 0.154021405 | 0.2548949   |
| cg17603219 | LRRC8D;L  | 1  | 0.01098413 | 0.30063963 | 0.323488212 | 0.496108865 |
| cg27373390 | LRRFIP2;L | 3  | 0.01479868 | 0.30024972 | 0.266455184 | 0.442746081 |
| cg24305555 | LRRFIP2;L | 3  | 0.00558836 | 0.60488376 | 0.550948722 | 0.741878323 |
| cg07165120 | LRRK1     | 15 | 0.01088059 | 0.23804767 | 0.289393479 | 0.477677716 |
| cg11408395 | LRRK1     | 15 | 0.00112679 | 0.64351206 | 0.660632813 | 0.803093171 |
| cg27313674 | LRRN4     | 20 | 0.00299664 | 0.37418106 | 0.386311402 | 0.536272127 |
| cg08963013 | LRRTM4    | 2  | 0.0190231  | 0.69252146 | 0.543114406 | 0.800190401 |
| cg23352483 | LSAMP     | 3  | 0.03758612 | 0.30882151 | 0.261984542 | 0.410941653 |
| cg03538814 | LSM14A;L  | 19 | 0.01170233 | 0.34690761 | 0.368055652 | 0.490023923 |
| cg09245582 | LSM4      | 19 | 0.0011159  | 0.38404571 | 0.407807921 | 0.647077641 |
| cg05409391 | LSP1      | 11 | 0.00195    | 0.77058989 | 0.756689796 | 0.875378877 |
| cg05003723 | LSP1      | 11 | 0.00223531 | 0.66455771 | 0.696119321 | 0.797705206 |
| cg09989681 | LSP1;LSP1 | 11 | 0.00228505 | 0.29052023 | 0.272070146 | 0.393187606 |
| cg16903735 | LSP1;LSP1 | 11 | 0.00082808 | 0.17466674 | 0.185424661 | 0.333065183 |
| cg26897904 | LSP1;LSP1 | 11 | 0.00466622 | 0.22267724 | 0.204669192 | 0.337067077 |
| cg15079934 | LSP1;LSP1 | 11 | 0.01058353 | 0.33856315 | 0.29990652  | 0.445530684 |
| cg07164388 | LTB4R2;L  | 14 | 0.01060969 | 0.56945193 | 0.561339517 | 0.67731093  |
| cg18658787 | LTBP1;LTI | 2  | 0.03358212 | 0.28679766 | 0.286952751 | 0.432471718 |
| cg27317046 | LTBP2     | 14 | 0.00628266 | 0.21774333 | 0.205836519 | 0.426000122 |
| cg23272978 | LTBP3;LTI | 11 | 0.00132756 | 0.48819838 | 0.532530035 | 0.654285407 |
| cg22046408 | LTBP4;LTI | 19 | 0.00295889 | 0.106322   | 0.13006754  | 0.251874649 |
| cg01564640 | LTBP4;LTI | 19 | 0.00416013 | 0.35521084 | 0.316410731 | 0.480067728 |
| cg26504110 | LTBP4;LTI | 19 | 0.01093065 | 0.17736087 | 0.138042664 | 0.297535442 |
| cg22706992 | LVRN      | 5  | 0.00736892 | 0.42481146 | 0.325569417 | 0.542019166 |
| cg18805892 | LY9;LY9   | 1  | 0.04560477 | 0.19533145 | 0.158710739 | 0.313357904 |
| cg08090164 | LYNX1;LY  | 8  | 0.00521564 | 0.20217148 | 0.206735122 | 0.36648122  |
| cg11812233 | LYPD1;LY  | 2  | 0.00704342 | 0.16805601 | 0.177419523 | 0.314795222 |
| cg19753174 | LYPLAL1   | 1  | 0.00113577 | 0.20408435 | 0.233676371 | 0.43449353  |
| cg02357637 | LYSMD4    | 15 | 0.00109306 | 0.19873069 | 0.225761815 | 0.375497318 |
| cg14085715 | MACC1     | 7  | 0.00663932 | 0.34246125 | 0.36236386  | 0.55047878  |
| cg09230154 | MACF1;M   | 1  | 0.01120712 | 0.15314545 | 0.20317288  | 0.3142901   |
| cg09705456 | MACROD    | 11 | 0.00088355 | 0.55802368 | 0.591964239 | 0.734318081 |
| cg02374207 | MACROD    | 11 | 0.00075494 | 0.14997442 | 0.164378615 | 0.312346235 |
| cg04683210 | MACROD    | 11 | 0.00113577 | 0.33094364 | 0.383692304 | 0.631966014 |

|            |         |    |            |            |             |             |
|------------|---------|----|------------|------------|-------------|-------------|
| cg19324462 | MACROD  | 11 | 0.00099652 | 0.35492085 | 0.408035479 | 0.597486437 |
| cg15769472 | MACROD  | 11 | 0.00208359 | 0.17245712 | 0.170299547 | 0.288999298 |
| cg16519399 | MACROD  | 11 | 0.00137728 | 0.13696213 | 0.138321154 | 0.248618866 |
| cg22011888 | MACROD  | 11 | 0.00160451 | 0.44219203 | 0.441826663 | 0.583500918 |
| cg22963979 | MAD1L1; | 7  | 0.00177922 | 0.20968842 | 0.246407019 | 0.441843874 |
| cg00860321 | MAD1L1; | 7  | 0.00330705 | 0.23174316 | 0.244823932 | 0.365538781 |
| cg08513622 | MAD1L1; | 7  | 0.02595684 | 0.18878053 | 0.205037294 | 0.306765751 |
| cg06624731 | MAD1L1; | 7  | 0.0094452  | 0.35227507 | 0.36843293  | 0.507084148 |
| cg02421172 | MAD1L1; | 7  | 0.0086963  | 0.2583233  | 0.201489598 | 0.421088618 |
| cg00749118 | MAD1L1; | 7  | 0.01766687 | 0.45214944 | 0.321544318 | 0.591958876 |
| cg11852646 | MAD1L1; | 7  | 0.00119385 | 0.48262249 | 0.491429998 | 0.657285818 |
| cg17551891 | MAD1L1; | 7  | 0.00181052 | 0.64052452 | 0.695060281 | 0.802431929 |
| cg03075889 | MAD1L1; | 7  | 0.04937176 | 0.32569885 | 0.506986448 | 0.624891083 |
| cg06994282 | MAD1L1; | 7  | 0.00065949 | 0.61934103 | 0.701774401 | 0.804984148 |
| cg05533001 | MAD1L1; | 7  | 0.00095227 | 0.41600053 | 0.414490776 | 0.551381775 |
| cg05434287 | MAD1L1; | 7  | 0.04489794 | 0.50730917 | 0.47145677  | 0.626040192 |
| cg09118048 | MAD1L1; | 7  | 0.00233734 | 0.18709192 | 0.201627403 | 0.315573075 |
| cg10534659 | MAD1L1; | 7  | 0.00634238 | 0.18405733 | 0.163754144 | 0.37962143  |
| cg05985070 | MAD1L1; | 7  | 0.00352201 | 0.22127159 | 0.22505459  | 0.436900346 |
| cg17498476 | MAD1L1; | 7  | 0.00129758 | 0.18062329 | 0.185560837 | 0.293624502 |
| cg15225688 | MAD1L1; | 7  | 0.00195    | 0.19772252 | 0.229474175 | 0.334208535 |
| cg24295561 | MAD1L1; | 7  | 0.00478595 | 0.38975348 | 0.437599389 | 0.552566895 |
| cg17103856 | MAD1L1; | 7  | 0.0037804  | 0.45469871 | 0.525807646 | 0.657436645 |
| cg21004924 | MAD1L1; | 7  | 0.00302287 | 0.4638076  | 0.535969103 | 0.668297452 |
| cg09075743 | MAD1L1; | 7  | 0.01744696 | 0.48671977 | 0.49747727  | 0.611065336 |
| cg12964697 | MAD1L1; | 7  | 0.00079018 | 0.59179764 | 0.631613453 | 0.732746652 |
| cg18319104 | MAD1L1; | 7  | 0.01191142 | 0.64106614 | 0.626962568 | 0.749677928 |
| cg04596071 | MAD1L1; | 7  | 0.00486966 | 0.27298727 | 0.271466253 | 0.416506057 |
| cg27238358 | MAD1L1; | 7  | 0.00091163 | 0.55011311 | 0.60690346  | 0.709308051 |
| cg16222367 | MAD1L1; | 7  | 0.00157286 | 0.34801474 | 0.39740594  | 0.599041351 |
| cg04863758 | MAEA;M/ | 4  | 0.00967401 | 0.17137117 | 0.163380456 | 0.286873452 |
| cg03207121 | MAFK    | 7  | 0.00913085 | 0.32049497 | 0.318304589 | 0.438545128 |
| cg00650672 | MAG11;M | 3  | 0.02289623 | 0.4086156  | 0.447743378 | 0.564141105 |
| cg25972943 | MAG12   | 7  | 0.01387172 | 0.25815515 | 0.282028526 | 0.411567326 |
| cg19755714 | MAML3   | 4  | 0.01506509 | 0.42861039 | 0.477609584 | 0.592965453 |
| cg03127558 | MAMSTR  | 19 | 0.0084821  | 0.47336681 | 0.481332712 | 0.620479199 |
| cg10404009 | MAMSTR  | 19 | 0.00710689 | 0.12960208 | 0.1301861   | 0.253484794 |
| cg24661274 | MAP1B   | 5  | 0.00120091 | 0.37839282 | 0.436490678 | 0.628467364 |
| cg04589021 | MAP2K3; | 17 | 0.00158722 | 0.22148916 | 0.207877885 | 0.400800145 |
| cg26779305 | MAP2K4; | 17 | 0.0017385  | 0.16482878 | 0.18025973  | 0.360952114 |
| cg04798016 | MAP3K11 | 11 | 0.01134767 | 0.35105967 | 0.30627514  | 0.466768289 |
| cg26038649 | MAP3K6  | 1  | 0.0009934  | 0.25318406 | 0.268524964 | 0.409779038 |
| cg02634454 | MAP4;M/ | 3  | 0.0026461  | 0.47553763 | 0.524908398 | 0.642411838 |
| cg04388901 | MAP4;M/ | 3  | 0.0190357  | 0.57030621 | 0.559185335 | 0.704507843 |
| cg18489755 | MAP6D1  | 3  | 0.0025935  | 0.15271563 | 0.190355982 | 0.328444963 |
| cg22117438 | MAPK10; | 4  | 0.00267111 | 0.6885931  | 0.699643545 | 0.83076714  |

|            |         |    |            |            |             |             |
|------------|---------|----|------------|------------|-------------|-------------|
| cg16054907 | MAPK11  | 22 | 0.00608941 | 0.24123768 | 0.223232968 | 0.353935163 |
| cg04059696 | MAPRE3  | 2  | 0.00109306 | 0.31249182 | 0.35119445  | 0.456166099 |
| cg06982473 | MARK2;N | 11 | 0.0017731  | 0.25223624 | 0.253732547 | 0.400911487 |
| cg09034795 | MARK2;N | 11 | 0.00220808 | 0.21534297 | 0.206329291 | 0.402514128 |
| cg10689689 | MARK2;N | 11 | 0.00156239 | 0.16993238 | 0.175306371 | 0.302560404 |
| cg21609804 | MARK2;N | 11 | 0.00412385 | 0.20730069 | 0.166876519 | 0.315377405 |
| cg18140824 | MASP1;M | 3  | 0.00197403 | 0.340518   | 0.357921456 | 0.581315179 |
| cg17462107 | MAST4;M | 5  | 0.00260306 | 0.20904389 | 0.216716226 | 0.391208023 |
| cg04348183 | MATN1   | 1  | 0.00188718 | 0.60147977 | 0.578049644 | 0.738389075 |
| cg17461278 | MATN1   | 1  | 0.00306113 | 0.35450653 | 0.366345503 | 0.532692378 |
| cg14183455 | MATN1   | 1  | 0.00094183 | 0.62067483 | 0.628779305 | 0.763938761 |
| cg24531825 | MATN1;N | 1  | 0.0023187  | 0.50267099 | 0.524916826 | 0.656319266 |
| cg21745307 | MATN4;R | 20 | 0.00097509 | 0.38383602 | 0.4510172   | 0.633733184 |
| cg12429065 | MB      | 22 | 0.00142756 | 0.23039129 | 0.275954377 | 0.478545109 |
| cg02312594 | MBD3    | 19 | 0.02995719 | 0.56671364 | 0.523371179 | 0.677665528 |
| cg25006077 | MBNL1;N | 3  | 0.00093078 | 0.09387596 | 0.160964283 | 0.281819189 |
| cg06155414 | MBNL2;N | 13 | 0.04270907 | 0.4643524  | 0.46570065  | 0.594521834 |
| cg11862665 | MBNL2;N | 13 | 0.0010175  | 0.43566331 | 0.510489856 | 0.662977271 |
| cg15683856 | MBNL2;N | 13 | 0.02743413 | 0.5335701  | 0.548559943 | 0.65968125  |
| cg15676677 | MCC;MC  | 5  | 0.02389893 | 0.12506514 | 0.112359724 | 0.251061413 |
| cg02481669 | MCCD1   | 6  | 0.00896808 | 0.46484439 | 0.437567816 | 0.586102703 |
| cg21609154 | MCF2L   | 13 | 0.01038208 | 0.32489269 | 0.296693364 | 0.430052035 |
| cg21847368 | MCF2L;M | 13 | 0.03474198 | 0.30462177 | 0.338977823 | 0.445051889 |
| cg15730074 | MCF2L;M | 13 | 0.00564684 | 0.55453439 | 0.625793829 | 0.746498324 |
| cg16277139 | MCF2L;M | 13 | 0.00539451 | 0.51417517 | 0.530943221 | 0.694084957 |
| cg20732304 | MCF2L;M | 13 | 0.01289854 | 0.33522834 | 0.30976385  | 0.448074451 |
| cg06264060 | MCHR1   | 22 | 0.00841345 | 0.19755166 | 0.157061848 | 0.302890189 |
| cg02621376 | MCOLN2  | 1  | 0.00779924 | 0.15248972 | 0.140575143 | 0.253877719 |
| cg19511748 | MCTP1;M | 5  | 0.00758361 | 0.54888942 | 0.543084726 | 0.676197826 |
| cg14558568 | MDFI    | 6  | 0.00198593 | 0.2088418  | 0.222692266 | 0.328358409 |
| cg23671901 | MDFI    | 6  | 0.00089487 | 0.30486855 | 0.336552497 | 0.444120284 |
| cg12328429 | ME3;ME3 | 11 | 0.00139627 | 0.41455452 | 0.479928577 | 0.645674492 |
| cg09416908 | ME3;ME3 | 11 | 0.01342633 | 0.35875459 | 0.404052616 | 0.535995499 |
| cg01384290 | MECOM   | 3  | 0.0075495  | 0.50456872 | 0.497127506 | 0.639658476 |
| cg15877399 | MED13L  | 12 | 0.02195382 | 0.49549078 | 0.450967212 | 0.644400343 |
| cg05133323 | MED13L  | 12 | 0.00468549 | 0.55711937 | 0.602248314 | 0.703508202 |
| cg15412772 | MED24;N | 17 | 0.00065949 | 0.11095947 | 0.169256204 | 0.320017496 |
| cg14300812 | MED27   | 9  | 0.00485896 | 0.72375072 | 0.737865719 | 0.841774641 |
| cg16126137 | MEG8    | 14 | 0.00142756 | 0.1086797  | 0.12195472  | 0.246869226 |
| cg26450275 | MEGF10  | 5  | 0.00422345 | 0.45837258 | 0.421515028 | 0.653110064 |
| cg22760690 | MEGF11  | 15 | 0.00629716 | 0.47579707 | 0.385400643 | 0.591357659 |
| cg06511312 | MEGF6   | 1  | 0.00576931 | 0.32060309 | 0.270156613 | 0.463583719 |
| cg27450668 | MEGF6   | 1  | 0.00744839 | 0.291611   | 0.228303816 | 0.411747931 |
| cg20826162 | MEGF6   | 1  | 0.01643293 | 0.19399036 | 0.153774933 | 0.294560819 |
| cg18553657 | MEGF8   | 19 | 0.00180551 | 0.48556339 | 0.513427608 | 0.615135718 |
| cg17945976 | MEIS1   | 2  | 0.00129758 | 0.05083793 | 0.111953611 | 0.213900799 |

|            |          |    |            |            |             |             |
|------------|----------|----|------------|------------|-------------|-------------|
| cg04288999 | MEIS1    | 2  | 0.00158297 | 0.0620715  | 0.124638951 | 0.235335722 |
| cg05877497 | MEIS1    | 2  | 0.00099274 | 0.09037555 | 0.185163114 | 0.322046755 |
| cg26537478 | MEIS1    | 2  | 0.00124625 | 0.10471389 | 0.182579139 | 0.308280441 |
| cg01271812 | MEIS1    | 2  | 0.00092849 | 0.12152126 | 0.200428252 | 0.34250914  |
| cg09535924 | MEIS1    | 2  | 0.00290119 | 0.21351855 | 0.254396314 | 0.430181838 |
| cg12082609 | MEIS1    | 2  | 0.00108543 | 0.11694856 | 0.180240855 | 0.31279964  |
| cg09550083 | MEIS1    | 2  | 0.00543186 | 0.20326956 | 0.281835155 | 0.466206605 |
| cg06994420 | MEIS1    | 2  | 0.00679225 | 0.34799333 | 0.361752471 | 0.51181836  |
| cg10464312 | MEIS1    | 2  | 0.00092643 | 0.16638842 | 0.23363133  | 0.35970276  |
| cg14775296 | MEIS1    | 2  | 0.00868337 | 0.15652235 | 0.173530081 | 0.274211567 |
| cg06833110 | MEIS1    | 2  | 0.0012898  | 0.08766502 | 0.165928578 | 0.295682849 |
| cg08238215 | MEIS1    | 2  | 0.00165724 | 0.11727227 | 0.173164519 | 0.276947711 |
| cg04339553 | MEIS2;MI | 15 | 0.00741048 | 0.32305691 | 0.356474439 | 0.554186126 |
| cg25447144 | MEIS2;MI | 15 | 0.00417366 | 0.52816652 | 0.568558864 | 0.687494609 |
| cg25221496 | MEIS2;MI | 15 | 0.01060969 | 0.52892686 | 0.511287246 | 0.744210341 |
| cg21177426 | MEIS2;MI | 15 | 0.00073118 | 0.22398474 | 0.314809153 | 0.593249761 |
| cg15902390 | MEIS2;MI | 15 | 0.00147518 | 0.12724435 | 0.199224315 | 0.32105838  |
| cg26708220 | MEIS2;MI | 15 | 0.00132935 | 0.15358077 | 0.226855099 | 0.364011561 |
| cg19010490 | MEIS2;MI | 15 | 0.00183659 | 0.26239887 | 0.299844513 | 0.504621991 |
| cg02377544 | MEIS2;MI | 15 | 0.00106594 | 0.29605495 | 0.325224127 | 0.491436476 |
| cg13181164 | MEIS2;MI | 15 | 0.00108543 | 0.09173825 | 0.170071018 | 0.277677909 |
| cg26585007 | MERTK    | 2  | 0.00253153 | 0.53741429 | 0.572092129 | 0.718691203 |
| cg13831540 | MESTIT1; | 7  | 0.00339981 | 0.25930412 | 0.229038587 | 0.410977869 |
| cg03260530 | METRNL   | 17 | 0.00180551 | 0.27027774 | 0.309752284 | 0.483834188 |
| cg16002136 | METRNL   | 17 | 0.00103509 | 0.61017328 | 0.604608902 | 0.765319336 |
| cg22846776 | METT10C  | 17 | 0.00337229 | 0.54965827 | 0.548600144 | 0.669003504 |
| cg24035107 | METT10C  | 17 | 0.00753069 | 0.13709549 | 0.140486193 | 0.302116902 |
| cg02148547 | METT11C  | 14 | 0.02990873 | 0.33211392 | 0.360470801 | 0.489751611 |
| cg16424082 | METTL7A  | 12 | 0.00488538 | 0.17821389 | 0.152073175 | 0.317449018 |
| cg11717597 | MEX3A    | 1  | 0.00081928 | 0.18575256 | 0.240812255 | 0.369782675 |
| cg26396535 | MEX3A    | 1  | 0.01102429 | 0.51433592 | 0.551968338 | 0.687081961 |
| cg02895724 | MEX3C    | 18 | 0.0252514  | 0.62275013 | 0.619290862 | 0.739187618 |
| cg21304454 | MFAP2;M  | 1  | 0.00228672 | 0.2261318  | 0.227361186 | 0.403200577 |
| cg01627785 | MFI2;MFI | 3  | 0.00393586 | 0.3300956  | 0.367671462 | 0.477296041 |
| cg00637433 | MFI2;MFI | 3  | 0.00113894 | 0.46124805 | 0.463312053 | 0.718448064 |
| cg03784611 | MFI2;MFI | 3  | 0.00893433 | 0.3214221  | 0.311072572 | 0.467972479 |
| cg21856334 | MFI2;MFI | 3  | 0.00233734 | 0.3695846  | 0.378332117 | 0.513561682 |
| cg04498801 | MFSD10;l | 4  | 0.00352201 | 0.4735168  | 0.50707579  | 0.638208322 |
| cg16924045 | MFSD6    | 2  | 0.00588734 | 0.25020484 | 0.236001629 | 0.476168597 |
| cg19391560 | MFSD6L   | 17 | 0.00131453 | 0.2190094  | 0.233324595 | 0.338102476 |
| cg18432414 | MFSD6L;l | 17 | 0.00287532 | 0.27179957 | 0.246642864 | 0.376022938 |
| cg11685316 | MFSD6L;l | 17 | 0.00395854 | 0.19643247 | 0.16016295  | 0.318651593 |
| cg07382437 | MGC1443  | 12 | 0.00252984 | 0.43352711 | 0.497619134 | 0.605764697 |
| cg11842367 | MGC2738  | 1  | 0.00223531 | 0.13107746 | 0.149301985 | 0.28208684  |
| cg18297349 | MGC295C  | 5  | 0.00552473 | 0.4125082  | 0.430578012 | 0.540538942 |
| cg18811130 | MGMT     | 10 | 0.02774083 | 0.52341294 | 0.562304738 | 0.672777241 |

|            |          |    |            |            |             |             |
|------------|----------|----|------------|------------|-------------|-------------|
| cg25974017 | MGMT     | 10 | 0.00917603 | 0.18517448 | 0.138171793 | 0.286361481 |
| cg13171643 | MGMT     | 10 | 0.00488538 | 0.34766935 | 0.35013835  | 0.527596897 |
| cg18502933 | MGMT     | 10 | 0.00796332 | 0.53327049 | 0.53768568  | 0.654163322 |
| cg08883995 | MGMT     | 10 | 0.01698967 | 0.27559271 | 0.293212378 | 0.437511592 |
| cg02750154 | MGMT     | 10 | 0.02291377 | 0.41340491 | 0.393929618 | 0.52567726  |
| cg25145165 | MGMT     | 10 | 0.00258198 | 0.39695393 | 0.435870759 | 0.553164934 |
| cg08147187 | MGRN1;N  | 16 | 0.00747631 | 0.65868012 | 0.631390035 | 0.775887476 |
| cg01156249 | MGRN1;N  | 16 | 0.00433996 | 0.30752328 | 0.359832426 | 0.484294733 |
| cg27436118 | MGRN1;N  | 16 | 0.00111057 | 0.13263378 | 0.145008965 | 0.276063977 |
| cg00736299 | MGRN1;N  | 16 | 0.00073118 | 0.21572325 | 0.176815175 | 0.348409425 |
| cg02074956 | MGRN1;N  | 16 | 0.00137728 | 0.2321141  | 0.233319077 | 0.346907429 |
| cg10505257 | MGRN1;N  | 16 | 0.00084371 | 0.23683886 | 0.224677322 | 0.476441958 |
| cg07812289 | MGRN1;N  | 16 | 0.0019386  | 0.50137708 | 0.486787448 | 0.63886171  |
| cg17456675 | MIB2;MIE | 1  | 0.0023961  | 0.40369694 | 0.408673415 | 0.562439325 |
| cg17529716 | MICA     | 6  | 0.03969411 | 0.67424204 | 0.649198005 | 0.790634288 |
| cg09210225 | MICA     | 6  | 0.00602378 | 0.49598379 | 0.49961586  | 0.643558142 |
| cg23080546 | MICA     | 6  | 0.00286384 | 0.24917703 | 0.212903098 | 0.395725847 |
| cg15242630 | MICAL3;N | 22 | 0.01440243 | 0.15921192 | 0.13883148  | 0.283123039 |
| cg02759751 | MICALL2  | 7  | 0.00113577 | 0.53654341 | 0.544077533 | 0.736791693 |
| cg05242402 | MICALL2  | 7  | 0.00092643 | 0.51804011 | 0.514747543 | 0.658051821 |
| cg11251690 | MICALL2  | 7  | 0.00127403 | 0.52311146 | 0.532267655 | 0.67277185  |
| cg02492818 | MICALL2  | 7  | 0.00131453 | 0.45497043 | 0.452847115 | 0.672287985 |
| cg22972565 | MICB     | 6  | 0.00953692 | 0.50220961 | 0.520461145 | 0.64283228  |
| cg14773523 | MINA;MI  | 3  | 0.01690382 | 0.42110045 | 0.377786687 | 0.532013354 |
| cg17649671 | MINPP1   | 10 | 0.00174721 | 0.12148466 | 0.099364953 | 0.254536948 |
| cg27621931 | MIPEP    | 13 | 0.01235814 | 0.16627493 | 0.171949018 | 0.29823909  |
| cg18222371 | MIR101-1 | 1  | 0.00208745 | 0.63485955 | 0.621162221 | 0.736755004 |
| cg20841588 | MIR1246  | 2  | 0.01934763 | 0.4651153  | 0.494611083 | 0.607162884 |
| cg03417340 | MIR140;v | 16 | 0.00081928 | 0.12131667 | 0.144095615 | 0.309338925 |
| cg00699693 | MIR140;v | 16 | 0.00165724 | 0.19979266 | 0.235706781 | 0.427788649 |
| cg07281938 | MIR140;v | 16 | 0.00078196 | 0.22234595 | 0.29547023  | 0.483609516 |
| cg03848856 | MIR140;v | 16 | 0.00233734 | 0.13655203 | 0.130833074 | 0.281603534 |
| cg03549146 | MIR140;v | 16 | 0.00075421 | 0.11019514 | 0.172161773 | 0.28773027  |
| cg00158530 | MIR140;v | 16 | 0.0011345  | 0.10406504 | 0.115213482 | 0.278912628 |
| cg08209934 | MIR140;v | 16 | 0.00427549 | 0.12782688 | 0.14231915  | 0.268482883 |
| cg26514117 | MIR181D  | 19 | 0.00183809 | 0.52944203 | 0.518540833 | 0.672610028 |
| cg26754262 | MIR2052  | 8  | 0.00802316 | 0.09543997 | 0.101596226 | 0.202343699 |
| cg02268620 | MIR24-1; | 9  | 0.00089174 | 0.61155547 | 0.644628043 | 0.810039488 |
| cg15076217 | MIR29C   | 1  | 0.00091042 | 0.52750881 | 0.521952809 | 0.663760552 |
| cg02875879 | MIR302A  | 4  | 0.02817047 | 0.44213175 | 0.426732885 | 0.556410131 |
| cg04390865 | MIR320B  | 1  | 0.03538972 | 0.19566471 | 0.164570732 | 0.315679281 |
| cg20632224 | MIR320B  | 1  | 0.02003709 | 0.1423178  | 0.139224289 | 0.265462413 |
| cg18163364 | MIR377   | 14 | 0.0103161  | 0.53189865 | 0.518476236 | 0.650776176 |
| cg11134801 | MIR377   | 14 | 0.01678972 | 0.31687821 | 0.300901294 | 0.430746942 |
| cg10006887 | MIR377   | 14 | 0.00912728 | 0.26480093 | 0.246211038 | 0.377846759 |
| cg04522625 | MIR548A  | 3  | 0.0013706  | 0.44330283 | 0.495598706 | 0.649081847 |

|            |          |    |            |            |             |             |
|------------|----------|----|------------|------------|-------------|-------------|
| cg18697991 | MIR548A  | 3  | 0.00935896 | 0.15478531 | 0.174299386 | 0.308568771 |
| cg23036340 | MIR548H  | 15 | 0.00964959 | 0.26337669 | 0.252268418 | 0.39839288  |
| cg09031823 | MIR575;S | 4  | 0.02265546 | 0.23299323 | 0.204130118 | 0.348759574 |
| cg20206204 | MIR614   | 12 | 0.01006689 | 0.50432372 | 0.501686507 | 0.626617393 |
| cg05346831 | MIR614   | 12 | 0.03453375 | 0.42929897 | 0.440287844 | 0.543925613 |
| cg18156845 | MIR744;N | 17 | 0.00124243 | 0.34138845 | 0.471644581 | 0.637123421 |
| cg06549228 | MIR758;N | 14 | 0.00133856 | 0.56355897 | 0.584499178 | 0.695508215 |
| cg22030962 | MIR874;K | 5  | 0.0055506  | 0.42304662 | 0.421166062 | 0.597395384 |
| cg00926267 | MKL1     | 22 | 0.00197789 | 0.35878365 | 0.36349     | 0.527794481 |
| cg00434573 | MKNK2;N  | 19 | 0.00079512 | 0.25538106 | 0.308892353 | 0.422176613 |
| cg07723431 | MKNK2;N  | 19 | 0.00105733 | 0.37527093 | 0.341872407 | 0.504238699 |
| cg07746514 | MLEC     | 12 | 0.0042054  | 0.49177545 | 0.552354327 | 0.684243654 |
| cg11872373 | MLL3     | 7  | 0.00467005 | 0.25154127 | 0.2070103   | 0.387597641 |
| cg25076197 | MLL5;ML  | 7  | 0.00921039 | 0.2855326  | 0.358407289 | 0.493051782 |
| cg01969558 | MLLT1    | 19 | 0.01233628 | 0.57842222 | 0.585836685 | 0.692955567 |
| cg22501243 | MLXIP    | 12 | 0.00479693 | 0.20091331 | 0.151934483 | 0.345591731 |
| cg14589810 | MMP28    | 17 | 0.00536676 | 0.3869223  | 0.431665171 | 0.537563147 |
| cg00187327 | MN1      | 22 | 0.01021297 | 0.2613643  | 0.29284399  | 0.441757611 |
| cg22708961 | MORN1    | 1  | 0.00630644 | 0.28193503 | 0.24095587  | 0.38402416  |
| cg08868601 | MORN1    | 1  | 0.00106082 | 0.38439164 | 0.399147219 | 0.587200242 |
| cg16600733 | MORN1    | 1  | 0.00645854 | 0.17717326 | 0.151711667 | 0.301042344 |
| cg05787839 | MORN1    | 1  | 0.00113894 | 0.23217184 | 0.26767395  | 0.38517623  |
| cg09811127 | MORN1;L  | 1  | 0.00147518 | 0.45124987 | 0.520844043 | 0.632202039 |
| cg20120371 | MPP2     | 17 | 0.01473127 | 0.27455238 | 0.246998648 | 0.413839042 |
| cg15406585 | MPP7     | 10 | 0.00073547 | 0.58897539 | 0.636564856 | 0.775032885 |
| cg14133850 | MPP7     | 10 | 0.00471011 | 0.38926677 | 0.493710006 | 0.629547587 |
| cg16527477 | MPP7     | 10 | 0.00659076 | 0.24243007 | 0.302760933 | 0.403911257 |
| cg09850478 | MPPED1   | 22 | 0.00702941 | 0.22436042 | 0.195032573 | 0.361817425 |
| cg20545941 | MPPED1   | 22 | 0.00917702 | 0.22608965 | 0.20157969  | 0.352197092 |
| cg03289072 | MRC2     | 17 | 0.00355421 | 0.56870627 | 0.36105388  | 0.46169792  |
| cg16405908 | MRGPRE   | 11 | 0.00675316 | 0.29192821 | 0.259432782 | 0.419291809 |
| cg25807487 | MRGPRF;  | 11 | 0.01810942 | 0.24595467 | 0.263962531 | 0.392641591 |
| cg18850728 | MRO;MR   | 18 | 0.01092179 | 0.25421155 | 0.235508649 | 0.373372685 |
| cg11375053 | MRPL17   | 11 | 0.02595684 | 0.46579887 | 0.420515092 | 0.57481742  |
| cg02928928 | MRPL23   | 11 | 0.00119376 | 0.1857221  | 0.190255883 | 0.338558549 |
| cg01530482 | MRPL23   | 11 | 0.01687692 | 0.5599964  | 0.602830332 | 0.711265507 |
| cg17519037 | MRPL45   | 17 | 0.00186737 | 0.26160267 | 0.26055145  | 0.36342832  |
| cg06995967 | MRPS16;  | 10 | 0.00655853 | 0.23517385 | 0.230910284 | 0.406373688 |
| cg04955683 | MRPS6    | 21 | 0.00569156 | 0.18997754 | 0.155279153 | 0.312543367 |
| cg02556430 | MRPS6;SI | 21 | 0.00197986 | 0.38215262 | 0.37822478  | 0.625230416 |
| cg21291385 | MRPS6;SI | 21 | 0.00100561 | 0.07939634 | 0.098375608 | 0.207739137 |
| cg08298091 | MRVI1;M  | 11 | 0.00319723 | 0.16409993 | 0.143162858 | 0.285795013 |
| cg00510149 | MRVI1;M  | 11 | 0.00079883 | 0.4020394  | 0.512293605 | 0.652437271 |
| cg22762189 | MSGN1    | 2  | 0.01543666 | 0.41269714 | 0.42661413  | 0.549063134 |
| cg22149471 | MSI2     | 17 | 0.00359691 | 0.25076941 | 0.261165208 | 0.494216669 |
| cg18875496 | MSI2;MSI | 17 | 0.03227846 | 0.28320738 | 0.323932505 | 0.430151313 |

|            |          |    |            |            |             |             |
|------------|----------|----|------------|------------|-------------|-------------|
| cg13654836 | MSI2;MSI | 17 | 0.00073118 | 0.19905919 | 0.264971347 | 0.427424422 |
| cg07159758 | MSI2;MSI | 17 | 0.00248169 | 0.21602417 | 0.241922909 | 0.46318551  |
| cg08677210 | MSI2;MSI | 17 | 0.02203216 | 0.37528694 | 0.4200692   | 0.531048237 |
| cg08788712 | MSI2;MSI | 17 | 0.0283256  | 0.53040963 | 0.536603578 | 0.66817475  |
| cg17045539 | MSI2;MSI | 17 | 0.00100115 | 0.56425615 | 0.600689371 | 0.717589895 |
| cg01030886 | MSRB3;M  | 12 | 0.00381594 | 0.63828254 | 0.661676193 | 0.797262435 |
| cg21538208 | MSX1     | 4  | 0.00081599 | 0.21293271 | 0.297077029 | 0.429251542 |
| cg09748975 | MSX1     | 4  | 0.00279442 | 0.36678568 | 0.414866942 | 0.554881399 |
| cg19001023 | MTA1     | 14 | 0.00297992 | 0.45983485 | 0.461746361 | 0.684438709 |
| cg18238340 | MTA1     | 14 | 0.0106654  | 0.36664041 | 0.342991929 | 0.503141779 |
| cg24183741 | MTA1     | 14 | 0.00153162 | 0.59332071 | 0.607119806 | 0.759265247 |
| cg27055366 | MTA1     | 14 | 0.00197007 | 0.25326875 | 0.246362444 | 0.378267137 |
| cg18920088 | MTHFD1L  | 6  | 0.00094083 | 0.25121632 | 0.266721491 | 0.55364392  |
| cg02285003 | MTMR12   | 5  | 0.00857076 | 0.23929667 | 0.220336984 | 0.412252064 |
| cg06740866 | MTMR12   | 5  | 0.00937895 | 0.66460856 | 0.685865192 | 0.792022487 |
| cg24683185 | MTMR15   | 15 | 0.00457113 | 0.30195821 | 0.351026011 | 0.510296828 |
| cg14256977 | MTMR2;M  | 11 | 0.00589356 | 0.17600055 | 0.150680441 | 0.279555259 |
| cg06094043 | MTMR6    | 13 | 0.02336655 | 0.41112455 | 0.430921248 | 0.545035524 |
| cg07122170 | MTOR;AN  | 1  | 0.04030438 | 0.2840728  | 0.251382261 | 0.426911124 |
| cg23629187 | MTSS1    | 8  | 0.0457117  | 0.58904782 | 0.543485715 | 0.689984255 |
| cg27038717 | MTSS1    | 8  | 0.02773862 | 0.42139298 | 0.451431233 | 0.553275558 |
| cg08996445 | MTSS1L   | 16 | 0.013012   | 0.24765026 | 0.2144585   | 0.386371398 |
| cg00147286 | MTSS1L   | 16 | 0.00126059 | 0.52262119 | 0.541979513 | 0.672750819 |
| cg07128900 | MTSS1L   | 16 | 0.00098577 | 0.54793018 | 0.563175503 | 0.742050031 |
| cg19075081 | MTSS1L   | 16 | 0.00463097 | 0.36145877 | 0.347958504 | 0.518843609 |
| cg07813065 | MTSS1L   | 16 | 0.00115277 | 0.35517392 | 0.368036193 | 0.54501736  |
| cg01304894 | MTSS1L   | 16 | 0.00110296 | 0.30310513 | 0.310538886 | 0.496538371 |
| cg04898035 | MTUS1;M  | 8  | 0.02149232 | 0.48554882 | 0.524263556 | 0.663202655 |
| cg02698708 | MTUS1;M  | 8  | 0.00349176 | 0.35012246 | 0.364923571 | 0.488592892 |
| cg25566714 | MUM1;M   | 19 | 0.00073378 | 0.7151523  | 0.767141544 | 0.907735745 |
| cg13937462 | MUPCDH   | 11 | 0.01773077 | 0.4273026  | 0.402921282 | 0.52755281  |
| cg14161107 | MUSK;MI  | 9  | 0.02096205 | 0.38753339 | 0.342379067 | 0.521571135 |
| cg04863197 | MYADML   | 17 | 0.00893433 | 0.30197173 | 0.292522607 | 0.425721082 |
| cg13189020 | MYBBP1A  | 17 | 0.00174903 | 0.25094679 | 0.230305292 | 0.392278724 |
| cg15598069 | MYH10    | 17 | 0.03708299 | 0.57359476 | 0.591661699 | 0.72509924  |
| cg25930644 | MYH10    | 17 | 0.00173053 | 0.35074843 | 0.400208406 | 0.536164624 |
| cg01828111 | MYH11;N  | 16 | 0.00539963 | 0.60117873 | 0.631157593 | 0.742855474 |
| cg26749543 | MYH9     | 22 | 0.00182655 | 0.27639863 | 0.262243454 | 0.427058636 |
| cg24899871 | MYL10    | 7  | 0.00591291 | 0.32236222 | 0.320228692 | 0.474894525 |
| cg10123201 | MYL3     | 3  | 0.00140256 | 0.34835026 | 0.386216809 | 0.545996303 |
| cg08936706 | MYL3     | 3  | 0.00576931 | 0.3537987  | 0.34291195  | 0.484549363 |
| cg19007948 | MYLK4    | 6  | 0.00274286 | 0.1948652  | 0.189976795 | 0.394264274 |
| cg05713044 | MYO10    | 5  | 0.00787909 | 0.16171012 | 0.159247407 | 0.310807037 |
| cg26264133 | MYO18A;  | 17 | 0.00295909 | 0.54111078 | 0.430772912 | 0.65951688  |
| cg20029153 | MYO18A;  | 17 | 0.00073118 | 0.18183788 | 0.245721285 | 0.380855418 |
| cg03134230 | MYO1B;N  | 2  | 0.02355792 | 0.42681987 | 0.368650379 | 0.544774967 |

|            |          |    |            |            |             |             |
|------------|----------|----|------------|------------|-------------|-------------|
| cg22987448 | MYO1F    | 19 | 0.00551458 | 0.23389124 | 0.183400157 | 0.355578877 |
| cg13523014 | MYO1F    | 19 | 0.00186737 | 0.6350455  | 0.61168425  | 0.797113811 |
| cg19089201 | MYO1G    | 7  | 0.00858426 | 0.31051078 | 0.283152342 | 0.42096809  |
| cg22132788 | MYO1G    | 7  | 0.00213825 | 0.32813822 | 0.297378646 | 0.485303422 |
| cg01379730 | MYO3B;N  | 2  | 0.00214604 | 0.61108148 | 0.637607739 | 0.758916054 |
| cg14100211 | MYO9A;S  | 15 | 0.00079512 | 0.42349016 | 0.469867372 | 0.672856278 |
| cg16526705 | MYO9B;N  | 19 | 0.00344865 | 0.59443935 | 0.591780822 | 0.704844572 |
| cg01410279 | MYOC     | 1  | 0.01880235 | 0.25990282 | 0.276736098 | 0.466026018 |
| cg00806505 | MYOC     | 1  | 0.00670577 | 0.3992237  | 0.38937236  | 0.553433709 |
| cg04852893 | MYOCD;N  | 17 | 0.00948686 | 0.29235715 | 0.282095952 | 0.473545544 |
| cg23636406 | MYOCD;N  | 17 | 0.00480767 | 0.27649504 | 0.27028868  | 0.45780897  |
| cg17800426 | MYOZ3;N  | 5  | 0.01040861 | 0.15893575 | 0.15289048  | 0.282920095 |
| cg13214422 | MYOZ3;N  | 5  | 0.00643366 | 0.58946263 | 0.604777391 | 0.727455681 |
| cg08549216 | MYST1;M  | 16 | 0.00353146 | 0.61292707 | 0.614746697 | 0.74057624  |
| cg15370732 | MYST2    | 17 | 0.00202314 | 0.57667292 | 0.589649166 | 0.756669761 |
| cg11849327 | MYST4    | 10 | 0.00465176 | 0.34414188 | 0.40161709  | 0.545138941 |
| cg03852659 | MYT1L    | 2  | 0.02385226 | 0.18357857 | 0.165522149 | 0.296687812 |
| cg02493986 | NACC2    | 9  | 0.00337598 | 0.36242075 | 0.345851532 | 0.626189751 |
| cg14152854 | NACC2    | 9  | 0.00553981 | 0.54403439 | 0.569897903 | 0.694926998 |
| cg23954731 | NAT14    | 19 | 0.0042005  | 0.33510752 | 0.323009432 | 0.436501765 |
| cg19827875 | NAV1     | 1  | 0.00368543 | 0.32155407 | 0.305304698 | 0.455218985 |
| cg03400139 | NAV1     | 1  | 0.0135118  | 0.32262453 | 0.303683525 | 0.42701314  |
| cg05695876 | NAV1     | 1  | 0.00180422 | 0.1986412  | 0.168920427 | 0.342276847 |
| cg14969261 | NAV2     | 11 | 0.0009934  | 0.30014249 | 0.346066041 | 0.55846542  |
| cg00491064 | NAV2     | 11 | 0.00205947 | 0.18610628 | 0.202206216 | 0.351609835 |
| cg18009574 | NAV2;NA  | 11 | 0.00354346 | 0.25201242 | 0.263620321 | 0.421773662 |
| cg09571376 | NAV2;NA  | 11 | 0.03576735 | 0.41389709 | 0.449669993 | 0.562485937 |
| cg23371436 | NAV2;NA  | 11 | 0.00156458 | 0.28982525 | 0.35327647  | 0.495006052 |
| cg01816186 | NBAS     | 2  | 0.00084118 | 0.32590699 | 0.38325487  | 0.587740699 |
| cg09936572 | NBPF1    | 1  | 0.00911882 | 0.31934439 | 0.330320546 | 0.470529219 |
| cg19865916 | NCDN;NC  | 1  | 0.00078196 | 0.39371064 | 0.459026638 | 0.640051082 |
| cg19758142 | NCEH1;N  | 3  | 0.00663444 | 0.4433776  | 0.414609053 | 0.66499863  |
| cg03729042 | NCF2;NCI | 1  | 0.00521564 | 0.28055686 | 0.331150474 | 0.465533983 |
| cg22687475 | NCK2;NCI | 2  | 0.00252124 | 0.72347419 | 0.711275094 | 0.833769628 |
| cg10998894 | NCLN     | 19 | 0.03190657 | 0.51706171 | 0.555009042 | 0.655648036 |
| cg27015161 | NCOA1;N  | 2  | 0.00298275 | 0.23619995 | 0.217769826 | 0.468142453 |
| cg08325898 | NCOA2    | 8  | 0.00947108 | 0.37169213 | 0.393664238 | 0.535444124 |
| cg13335567 | NCOA2    | 8  | 0.01040141 | 0.17845942 | 0.203619137 | 0.34250726  |
| cg04544533 | NCOR2;N  | 12 | 0.02551242 | 0.58532545 | 0.535500887 | 0.695622188 |
| cg11197258 | NCOR2;N  | 12 | 0.00156869 | 0.22163822 | 0.243471703 | 0.518315686 |
| cg10283674 | NCOR2;N  | 12 | 0.00239775 | 0.45452204 | 0.42178142  | 0.5629661   |
| cg10082088 | NCOR2;N  | 12 | 0.00342408 | 0.2889593  | 0.301503265 | 0.449982246 |
| cg10849160 | NCOR2;N  | 12 | 0.00561885 | 0.18266623 | 0.160712161 | 0.285480002 |
| cg08276543 | NCOR2;N  | 12 | 0.00147873 | 0.41105097 | 0.392549832 | 0.520902039 |
| cg24432389 | NCOR2;N  | 12 | 0.00259677 | 0.33735852 | 0.33172038  | 0.446921376 |
| cg17429587 | NCOR2;N  | 12 | 0.00309287 | 0.51551425 | 0.497729713 | 0.665322555 |



|            |          |    |            |            |             |             |
|------------|----------|----|------------|------------|-------------|-------------|
| cg09831875 | NCOR2;N  | 12 | 0.02562377 | 0.23107625 | 0.199411282 | 0.335848985 |
| cg03406367 | NCOR2;N  | 12 | 0.00971274 | 0.147289   | 0.134757468 | 0.26577669  |
| cg19341309 | NCOR2;N  | 12 | 0.00115308 | 0.18055621 | 0.210552646 | 0.392281136 |
| cg22611259 | NCOR2;N  | 12 | 0.00065949 | 0.67472938 | 0.733648563 | 0.838664674 |
| cg20494738 | NCOR2;N  | 12 | 0.00073265 | 0.58507911 | 0.672878164 | 0.84905526  |
| cg27044649 | NCOR2;N  | 12 | 0.00141573 | 0.29225961 | 0.371830231 | 0.562363572 |
| cg10996589 | NCOR2;N  | 12 | 0.0011122  | 0.29099306 | 0.333682059 | 0.553381413 |
| cg04579183 | NCRNAOC  | 15 | 0.00133856 | 0.40680716 | 0.486341692 | 0.734612571 |
| cg10859327 | NCRNAOC  | 10 | 0.0034485  | 0.21303711 | 0.234395098 | 0.505511319 |
| cg03938110 | NCRNAOC  | 21 | 0.00411808 | 0.22939447 | 0.231337607 | 0.393120961 |
| cg02532853 | NCRNAOC  | 21 | 0.00751269 | 0.32306559 | 0.309613541 | 0.494939671 |
| cg13049432 | NCRNAOC  | 21 | 0.00352201 | 0.47869634 | 0.52099784  | 0.64836898  |
| cg17611512 | NCRNAOC  | 21 | 0.00910457 | 0.2636446  | 0.257142821 | 0.38930862  |
| cg25623524 | NCRNAOC  | 19 | 0.00882698 | 0.19910476 | 0.152312742 | 0.307379096 |
| cg02396982 | NDE1;ND  | 16 | 0.00312811 | 0.52143644 | 0.526178412 | 0.657812719 |
| cg10078898 | NDRG2;N  | 14 | 0.00208072 | 0.15569243 | 0.157127905 | 0.261544377 |
| cg04359602 | NDRG2;N  | 14 | 0.01713917 | 0.17845695 | 0.18566723  | 0.323161525 |
| cg08895618 | NDST1    | 5  | 0.00591073 | 0.13581164 | 0.127302414 | 0.255074693 |
| cg16674484 | NDST1    | 5  | 0.00219431 | 0.19853721 | 0.263245815 | 0.392014695 |
| cg02633363 | NDST1    | 5  | 0.02833129 | 0.35111475 | 0.351701532 | 0.457369747 |
| cg15337815 | NDST1    | 5  | 0.00341932 | 0.4523429  | 0.475431341 | 0.577492718 |
| cg08733553 | NDUFAB1  | 16 | 0.00332487 | 0.63173053 | 0.607348426 | 0.745685142 |
| cg05774231 | NDUFB4;I | 3  | 0.03354729 | 0.36121769 | 0.409338294 | 0.516888803 |
| cg00525496 | NEDD9;N  | 6  | 0.0261625  | 0.48737361 | 0.471864053 | 0.592697093 |
| cg13974765 | NEK6;NEI | 9  | 0.00317466 | 0.2456938  | 0.239651504 | 0.360016194 |
| cg19624630 | NEK7     | 1  | 0.02348349 | 0.32807329 | 0.36950938  | 0.511539535 |
| cg24429037 | NEU4;NEI | 2  | 0.00228672 | 0.44604817 | 0.506503322 | 0.636268872 |
| cg10504150 | NEU4;NEI | 2  | 0.00123203 | 0.50692593 | 0.581744535 | 0.686943876 |
| cg18095041 | NEU4;NEI | 2  | 0.00081413 | 0.33592161 | 0.372258028 | 0.542157004 |
| cg16660312 | NEU4;NEI | 2  | 0.00081925 | 0.26872332 | 0.347630729 | 0.492636612 |
| cg11706790 | NEU4;NEI | 2  | 0.0011571  | 0.37709327 | 0.466335244 | 0.640009499 |
| cg20791593 | NEU4;NEI | 2  | 0.00312811 | 0.22126685 | 0.242557347 | 0.413007704 |
| cg02358362 | NEURL1B  | 5  | 0.00625772 | 0.19016264 | 0.154941521 | 0.291656835 |
| cg01691332 | NEURL1B  | 5  | 0.00201346 | 0.23129162 | 0.203447164 | 0.414469921 |
| cg17505852 | NF2;NF2; | 22 | 0.0212437  | 0.22108776 | 0.162277135 | 0.334628315 |
| cg13098379 | NFASC;NF | 1  | 0.00283173 | 0.47608362 | 0.508462609 | 0.671867209 |
| cg27426044 | NFASC;NF | 1  | 0.00160583 | 0.31386235 | 0.351870948 | 0.467783669 |
| cg04110750 | NFAT5;NF | 16 | 0.00322924 | 0.25645164 | 0.286338334 | 0.523741124 |
| cg23240477 | NFATC1;I | 18 | 0.00131453 | 0.18152323 | 0.198998476 | 0.368276221 |
| cg16536399 | NFATC1;I | 18 | 0.00087274 | 0.2725976  | 0.338837487 | 0.482775402 |
| cg22532194 | NFATC1;I | 18 | 0.00993335 | 0.49634073 | 0.495859792 | 0.617394565 |
| cg11321921 | NFATC1;I | 18 | 0.03947516 | 0.60034927 | 0.518524555 | 0.729310247 |
| cg05718035 | NFATC1;I | 18 | 0.00107365 | 0.29599856 | 0.333239096 | 0.485648889 |
| cg14715383 | NFATC1;I | 18 | 0.00184894 | 0.30227776 | 0.338128486 | 0.555210318 |
| cg15517343 | NFATC1;I | 18 | 0.00177192 | 0.41848687 | 0.444757032 | 0.601818219 |
| cg18590092 | NFATC1;I | 18 | 0.00332266 | 0.26515818 | 0.269361963 | 0.413158139 |

|            |           |    |            |            |             |             |
|------------|-----------|----|------------|------------|-------------|-------------|
| cg05859578 | NFATC1;†  | 18 | 0.00540896 | 0.25345265 | 0.260941619 | 0.422814276 |
| cg27624471 | NFATC1;†  | 18 | 0.01083301 | 0.33129405 | 0.370217153 | 0.472643857 |
| cg16182267 | NFATC1;†  | 18 | 0.00126235 | 0.38413659 | 0.392329572 | 0.494409814 |
| cg13731636 | NFATC1;†  | 18 | 0.00403328 | 0.43539176 | 0.43884785  | 0.624323817 |
| cg15784814 | NFATC1;†  | 18 | 0.04508458 | 0.55309599 | 0.58641876  | 0.719755186 |
| cg15908877 | NFATC1;†  | 18 | 0.00202314 | 0.57769775 | 0.580927474 | 0.695144712 |
| cg05264214 | NFATC1;†  | 18 | 0.00233544 | 0.25419243 | 0.245280442 | 0.469604366 |
| cg07342752 | NFATC1;†  | 18 | 0.00073265 | 0.39801286 | 0.477499809 | 0.699279977 |
| cg10357989 | NFATC1;†  | 18 | 0.00228672 | 0.38218992 | 0.393442704 | 0.525316095 |
| cg25546405 | NFATC1;†  | 18 | 0.00400629 | 0.15232604 | 0.145509396 | 0.316251142 |
| cg27019645 | NFATC1;†  | 18 | 0.00629918 | 0.25534754 | 0.188581451 | 0.368641091 |
| cg15532942 | NFATC1;†  | 18 | 0.00152273 | 0.14979256 | 0.15533231  | 0.27601178  |
| cg09773897 | NFIC      | 19 | 0.00167443 | 0.38613031 | 0.424285431 | 0.569236936 |
| cg04340258 | NFIC;NFIC | 19 | 0.00088355 | 0.2297972  | 0.25371862  | 0.360783208 |
| cg15658793 | NFIC;NFIC | 19 | 0.00123203 | 0.16228763 | 0.172748873 | 0.312835834 |
| cg22315974 | NFIC;NFIC | 19 | 0.00547327 | 0.14278119 | 0.127421715 | 0.24338189  |
| cg16588649 | NFIC;NFIC | 19 | 0.00109472 | 0.37878491 | 0.375071202 | 0.557567599 |
| cg22824635 | NFIX      | 19 | 0.00405051 | 0.31972011 | 0.330207277 | 0.55610512  |
| cg09394128 | NFIX      | 19 | 0.00402744 | 0.39699154 | 0.393632522 | 0.512068389 |
| cg12522311 | NFIX      | 19 | 0.01016149 | 0.16820396 | 0.156058307 | 0.269395044 |
| cg15783941 | NFIX      | 19 | 0.00227382 | 0.22703836 | 0.235919374 | 0.386947482 |
| cg06623668 | NFIX      | 19 | 0.008246   | 0.43586427 | 0.456487179 | 0.615930988 |
| cg13649253 | NFIX      | 19 | 0.00203482 | 0.26082772 | 0.307965376 | 0.474980428 |
| cg12499092 | NFYB      | 12 | 0.00197576 | 0.69823732 | 0.668373222 | 0.824641671 |
| cg12421282 | NFYC;NFY  | 1  | 0.02157743 | 0.3727106  | 0.358802146 | 0.537369439 |
| cg11135080 | NFYC;NFY  | 1  | 0.00293735 | 0.40830246 | 0.455218782 | 0.598168614 |
| cg17048169 | NGEF;NG   | 2  | 0.00165917 | 0.18998134 | 0.190163413 | 0.407589288 |
| cg26178217 | NGEF;NG   | 2  | 0.00099274 | 0.57378366 | 0.616706651 | 0.722576615 |
| cg20388707 | NGEF;NG   | 2  | 0.00093925 | 0.31178778 | 0.327186199 | 0.441744257 |
| cg24367967 | NGEF;NG   | 2  | 0.00627871 | 0.41558074 | 0.432306405 | 0.534069491 |
| cg20539430 | NGEF;NG   | 2  | 0.00521564 | 0.56454141 | 0.599237976 | 0.708600411 |
| cg26152051 | NHEJ1     | 2  | 0.00112679 | 0.4842212  | 0.561405418 | 0.728752803 |
| cg08106288 | NHEJ1     | 2  | 0.02155924 | 0.13989346 | 0.114204073 | 0.242876396 |
| cg24324628 | NHSL1     | 6  | 0.03038061 | 0.26950495 | 0.218028594 | 0.377313293 |
| cg03379797 | NHSL1     | 6  | 0.00499408 | 0.20220557 | 0.150259693 | 0.325016557 |
| cg21730858 | NHSL1;Nf  | 6  | 0.0138324  | 0.32762437 | 0.361807095 | 0.478682148 |
| cg16449219 | NIN;NIN;I | 14 | 0.03124896 | 0.1543222  | 0.144459254 | 0.289661597 |
| cg04155718 | NISCH     | 3  | 0.0051141  | 0.69079209 | 0.672744725 | 0.811054388 |
| cg16750777 | NKD1      | 16 | 0.00218799 | 0.27207964 | 0.288844647 | 0.40195762  |
| cg04685962 | NKD1      | 16 | 0.00666111 | 0.54668334 | 0.577859034 | 0.682583789 |
| cg01827248 | NKD1      | 16 | 0.0023323  | 0.29282047 | 0.297798053 | 0.488627772 |
| cg02015823 | NKD1      | 16 | 0.02717186 | 0.27740338 | 0.27346458  | 0.403294522 |
| cg05779675 | NKD1      | 16 | 0.00369903 | 0.34873387 | 0.338673558 | 0.455842217 |
| cg09624807 | NLRC5     | 16 | 0.00073118 | 0.34167032 | 0.38816907  | 0.616972979 |
| cg07121721 | NLRP1     | 17 | 0.00152405 | 0.30722855 | 0.199882436 | 0.450734859 |
| cg19972788 | NLRP1;LC  | 17 | 0.004607   | 0.39858331 | 0.415687842 | 0.558904733 |

|            |          |    |            |            |             |             |
|------------|----------|----|------------|------------|-------------|-------------|
| cg06877848 | NME2;NM  | 17 | 0.03160477 | 0.58989092 | 0.596594007 | 0.714989205 |
| cg27233027 | NME7;NM  | 1  | 0.02680775 | 0.55324682 | 0.503948721 | 0.678024672 |
| cg02016985 | NMRAL1   | 16 | 0.00218837 | 0.51654969 | 0.520993444 | 0.644672683 |
| cg02268561 | NMT2     | 10 | 0.02846049 | 0.3042408  | 0.341525625 | 0.446225883 |
| cg20299802 | NOS1AP;I | 1  | 0.01284723 | 0.3014978  | 0.309845392 | 0.439485223 |
| cg06301529 | NOS2;NO  | 17 | 0.02794807 | 0.18065145 | 0.136711059 | 0.288794541 |
| cg21292909 | NOSIP    | 19 | 0.01580869 | 0.5198696  | 0.516358095 | 0.665238162 |
| cg04355077 | NOSIP    | 19 | 0.01767742 | 0.69004414 | 0.685450699 | 0.792190073 |
| cg26274166 | NOSIP    | 19 | 0.00904361 | 0.38278493 | 0.376668397 | 0.53526432  |
| cg03348937 | NOTCH1   | 9  | 0.04957184 | 0.4159798  | 0.479304815 | 0.58115383  |
| cg13613245 | NOTCH1   | 9  | 0.01960841 | 0.42147189 | 0.51194757  | 0.617259955 |
| cg14528979 | NOTCH1   | 9  | 0.00391578 | 0.28669548 | 0.386287543 | 0.594191042 |
| cg14205001 | NOTCH1   | 9  | 0.00073118 | 0.57865772 | 0.612967607 | 0.776764441 |
| cg05019807 | NOTCH1   | 9  | 0.00146869 | 0.67747588 | 0.707769617 | 0.831740399 |
| cg14494733 | NOTCH1   | 9  | 0.00083771 | 0.31739747 | 0.341165859 | 0.687331683 |
| cg26779406 | NOTCH1   | 9  | 0.00132756 | 0.34564157 | 0.361995708 | 0.478054275 |
| cg21234123 | NOTCH1   | 9  | 0.00251187 | 0.66619118 | 0.681182524 | 0.790001411 |
| cg08828723 | NOTCH4   | 6  | 0.01670995 | 0.26303903 | 0.253482059 | 0.384112684 |
| cg08801479 | NOTCH4   | 6  | 0.02748288 | 0.1837936  | 0.163868734 | 0.304552164 |
| cg07012823 | NOX3     | 6  | 0.02902686 | 0.13358266 | 0.142465253 | 0.246155882 |
| cg21765730 | NOX3     | 6  | 0.00211366 | 0.137505   | 0.138515527 | 0.324227773 |
| cg02156899 | NOXO1;N  | 16 | 0.00693622 | 0.26248164 | 0.246866448 | 0.375679028 |
| cg26047938 | NPAS2    | 2  | 0.01891633 | 0.24763485 | 0.22992615  | 0.401382052 |
| cg10147348 | NPAS2    | 2  | 0.00971128 | 0.60320944 | 0.584039058 | 0.703728408 |
| cg02094363 | NPAS3;NI | 14 | 0.00670577 | 0.35603697 | 0.356538526 | 0.509923347 |
| cg13496915 | NPAS3;NI | 14 | 0.00518902 | 0.24122739 | 0.224745904 | 0.46196791  |
| cg13019512 | NPM1;NF  | 5  | 0.00806542 | 0.36622613 | 0.362893556 | 0.50049032  |
| cg04865220 | NPTN;NP  | 15 | 0.00265516 | 0.18450219 | 0.199475228 | 0.354293129 |
| cg19996221 | NPTN;NP  | 15 | 0.02075286 | 0.35629953 | 0.38524774  | 0.503558957 |
| cg22082015 | NR1D1    | 17 | 0.00103895 | 0.34665124 | 0.441022415 | 0.554328785 |
| cg24975211 | NR1D1;Tf | 17 | 0.00414415 | 0.14919473 | 0.136984719 | 0.261420272 |
| cg18713088 | NR4A1;Nf | 12 | 0.0051141  | 0.53900287 | 0.534529763 | 0.673851972 |
| cg26933107 | NR4A1;Nf | 12 | 0.00252984 | 0.43451422 | 0.399150984 | 0.546808647 |
| cg17841545 | NRAP;NR  | 10 | 0.00473034 | 0.37064741 | 0.469638517 | 0.578097754 |
| cg13216112 | NRBF2    | 10 | 0.00394226 | 0.21914812 | 0.246236214 | 0.39225124  |
| cg01540911 | NRF1;NRI | 7  | 0.04794324 | 0.44598898 | 0.435057803 | 0.581882593 |
| cg20712980 | NRF1;NRI | 7  | 0.00219137 | 0.25303373 | 0.314755083 | 0.419456288 |
| cg02359746 | NRG1;NR  | 8  | 0.01543114 | 0.22293089 | 0.244853513 | 0.362744705 |
| cg24724630 | NRG2;NR  | 5  | 0.00375959 | 0.35772413 | 0.315832692 | 0.460063984 |
| cg01068601 | NRN1L    | 16 | 0.00754388 | 0.30235845 | 0.262197    | 0.438616552 |
| cg21660452 | NRXN2;N  | 11 | 0.0057439  | 0.42452118 | 0.504053248 | 0.647532206 |
| cg18121224 | NSD1;NSI | 5  | 0.0103127  | 0.17161393 | 0.149667044 | 0.301186682 |
| cg14950344 | NSF      | 17 | 0.03999097 | 0.21619868 | 0.224972735 | 0.327393716 |
| cg12034199 | NSUN5B;I | 7  | 0.00181621 | 0.48867782 | 0.480793677 | 0.589557843 |
| cg02344784 | NT5DC3   | 12 | 0.00556197 | 0.27574918 | 0.277522288 | 0.442633836 |
| cg02042623 | NT5DC3   | 12 | 0.01011462 | 0.17216191 | 0.143346251 | 0.294744012 |

|            |          |    |            |            |             |             |
|------------|----------|----|------------|------------|-------------|-------------|
| cg09989847 | NT5E     | 6  | 0.03173228 | 0.25982731 | 0.271719669 | 0.375228487 |
| cg12620806 | NTF3;NTF | 12 | 0.00570746 | 0.42014549 | 0.484487141 | 0.645518619 |
| cg11647944 | NTF3;NTF | 12 | 0.01144141 | 0.23181436 | 0.213029144 | 0.362380039 |
| cg23405457 | NTM      | 11 | 0.00257729 | 0.55919418 | 0.56719193  | 0.715124348 |
| cg11754374 | NTM      | 11 | 0.00126059 | 0.75257097 | 0.756111208 | 0.883470835 |
| cg18377376 | NTM      | 11 | 0.00198688 | 0.49299412 | 0.47853404  | 0.678106908 |
| cg20827960 | NTM;NTM  | 11 | 0.00619019 | 0.66612854 | 0.604841086 | 0.773961864 |
| cg16996632 | NTM;NTM  | 11 | 0.00753069 | 0.5529928  | 0.507776888 | 0.663942178 |
| cg07114544 | NTN1     | 17 | 0.00354864 | 0.18853884 | 0.184765088 | 0.385258007 |
| cg19441674 | NTN1     | 17 | 0.00704609 | 0.42216375 | 0.403714123 | 0.531564023 |
| cg14447193 | NTRK2;N  | 9  | 0.00337598 | 0.16428772 | 0.153094349 | 0.292508151 |
| cg02926307 | NUAK1    | 12 | 0.00138618 | 0.19221924 | 0.221714984 | 0.394744686 |
| cg07508429 | NUDCD3   | 7  | 0.00971256 | 0.36766859 | 0.332923929 | 0.523966027 |
| cg24829430 | NUDCD3   | 7  | 0.00323448 | 0.58850799 | 0.59804901  | 0.714577172 |
| cg16251232 | NUDCD3   | 7  | 0.00675316 | 0.49896891 | 0.460504464 | 0.629130201 |
| cg02151120 | NUMA1    | 11 | 0.00513872 | 0.24799222 | 0.236350856 | 0.357788862 |
| cg07999415 | NUMA1    | 11 | 0.02010471 | 0.30243878 | 0.280642802 | 0.41708966  |
| cg14705010 | NUMA1    | 11 | 0.00515613 | 0.26658727 | 0.213574167 | 0.423142278 |
| cg20887442 | NUMA1    | 11 | 0.00157286 | 0.20851127 | 0.196462402 | 0.388312307 |
| cg11196788 | NUMA1    | 11 | 0.00476313 | 0.30586084 | 0.281832681 | 0.414392668 |
| cg03352427 | NUP210L  | 1  | 0.01336583 | 0.33938533 | 0.30073822  | 0.459020489 |
| cg10093067 | NUP98;N  | 11 | 0.04228846 | 0.41100372 | 0.369763811 | 0.547643205 |
| cg21035374 | NWD1;N   | 19 | 0.01486263 | 0.44588499 | 0.423523427 | 0.556350991 |
| cg24101979 | NXN      | 17 | 0.00295889 | 0.34860914 | 0.39887749  | 0.530930281 |
| cg23768572 | NXN      | 17 | 0.00467797 | 0.14373554 | 0.143878487 | 0.254421623 |
| cg02273477 | NXN      | 17 | 0.02075001 | 0.40930766 | 0.452225193 | 0.574947733 |
| cg19669385 | NXN      | 17 | 0.01146765 | 0.2906041  | 0.338275179 | 0.495057283 |
| cg20633370 | NXN      | 17 | 0.00194981 | 0.4383108  | 0.506878731 | 0.650694732 |
| cg14136893 | NXN      | 17 | 0.01450286 | 0.27746772 | 0.263441847 | 0.382103888 |
| cg05794117 | OBSCN;O  | 1  | 0.00705117 | 0.25942405 | 0.272075325 | 0.393018647 |
| cg23644589 | OBSCN;O  | 1  | 0.00936695 | 0.75458573 | 0.686766052 | 0.872332843 |
| cg18494421 | OBSCN;O  | 1  | 0.00295623 | 0.30599335 | 0.26792818  | 0.420252048 |
| cg05521175 | OBSL1    | 2  | 0.02389088 | 0.26653114 | 0.265284314 | 0.416193957 |
| cg14037346 | ODF2     | 9  | 0.00426883 | 0.19926876 | 0.16638848  | 0.321101021 |
| cg06608378 | ODF3L1   | 15 | 0.00228672 | 0.57409947 | 0.585020527 | 0.70489127  |
| cg11097249 | ODZ2     | 5  | 0.01093065 | 0.28661412 | 0.294015027 | 0.479818762 |
| cg00192966 | ODZ2     | 5  | 0.03095964 | 0.26950965 | 0.233015511 | 0.373044314 |
| cg12025243 | ODZ4     | 11 | 0.00160583 | 0.43883547 | 0.415174044 | 0.565955877 |
| cg16013670 | OPN3     | 1  | 0.00585587 | 0.4343737  | 0.445851997 | 0.580304428 |
| cg09970593 | OPRD1    | 1  | 0.00311192 | 0.303085   | 0.277790533 | 0.457348839 |
| cg22539670 | OSBPL10  | 3  | 0.01708682 | 0.44423985 | 0.420459196 | 0.595934336 |
| cg09641663 | OSBPL10  | 3  | 0.0156698  | 0.30578543 | 0.29936465  | 0.465047194 |
| cg26949612 | OSBPL6   | 2  | 0.01880235 | 0.51989561 | 0.541918051 | 0.658809815 |
| cg03739877 | P11;P11  | 12 | 0.00089487 | 0.48319449 | 0.469877192 | 0.604020951 |
| cg10287137 | P2RY2;P2 | 11 | 0.00113577 | 0.2032046  | 0.198302723 | 0.305530857 |
| cg08695113 | P4HA1;P4 | 10 | 0.01616965 | 0.16089872 | 0.129218582 | 0.317744953 |

|            |          |    |            |            |             |             |
|------------|----------|----|------------|------------|-------------|-------------|
| cg17054691 | P4HB     | 17 | 0.0022985  | 0.30144042 | 0.297240717 | 0.408295659 |
| cg14492337 | P4HB     | 17 | 0.00172495 | 0.14310103 | 0.146328797 | 0.261527299 |
| cg20869369 | PABPC1L  | 20 | 0.00556434 | 0.41832005 | 0.385536746 | 0.552259486 |
| cg08999742 | PABPN1L  | 16 | 0.00561885 | 0.43072841 | 0.466324596 | 0.568844366 |
| cg09428340 | PACRG;P/ | 6  | 0.00230768 | 0.35444061 | 0.395269969 | 0.531079125 |
| cg26344026 | PACS1    | 11 | 0.00173353 | 0.43156995 | 0.415595001 | 0.620957335 |
| cg16162970 | PACS2;PA | 14 | 0.00144385 | 0.15577282 | 0.176089821 | 0.278234951 |
| cg16783764 | PACS2;PA | 14 | 0.00094183 | 0.61440098 | 0.618108704 | 0.726985204 |
| cg18374755 | PACS2;PA | 14 | 0.00494219 | 0.48238475 | 0.45785818  | 0.598694729 |
| cg14063129 | PACS2;PA | 14 | 0.00174721 | 0.11563139 | 0.126117569 | 0.250176549 |
| cg01052428 | PACS2;PA | 14 | 0.00090315 | 0.22229624 | 0.243439628 | 0.348156621 |
| cg21170836 | PACS2;PA | 14 | 0.00198593 | 0.47261233 | 0.483932171 | 0.59812483  |
| cg07521618 | PACS2;PA | 14 | 0.00092387 | 0.2770181  | 0.30408509  | 0.483573596 |
| cg15483436 | PACS2;PA | 14 | 0.00153162 | 0.50542274 | 0.513020304 | 0.627355474 |
| cg12158535 | PACS2;PA | 14 | 0.00146869 | 0.21565089 | 0.226998245 | 0.339033338 |
| cg12397564 | PAFAH2   | 1  | 0.00822746 | 0.16044948 | 0.128631281 | 0.30888424  |
| cg17263916 | PAIP2;PA | 5  | 0.00591073 | 0.47778669 | 0.48532271  | 0.625315503 |
| cg14069287 | PALLD;PA | 4  | 0.00689691 | 0.22711149 | 0.221343563 | 0.339973879 |
| cg21204870 | PALM2;P/ | 9  | 0.00277534 | 0.53524004 | 0.585295806 | 0.75092361  |
| cg17407629 | PAM;PAN  | 5  | 0.01398104 | 0.35240442 | 0.356858878 | 0.508260663 |
| cg22911687 | PAM;PAN  | 5  | 0.00109306 | 0.64821996 | 0.561283408 | 0.807392938 |
| cg20655220 | PAM;PAN  | 5  | 0.03793002 | 0.48209643 | 0.443276605 | 0.628058299 |
| cg12617066 | PANK2;M  | 20 | 0.02277323 | 0.25405066 | 0.279395659 | 0.400681095 |
| cg15007472 | PANX1    | 11 | 0.01674385 | 0.52804638 | 0.539424694 | 0.661093373 |
| cg16805189 | PANX1    | 11 | 0.0033331  | 0.52656117 | 0.567620374 | 0.678520303 |
| cg21894762 | PAPLN    | 14 | 0.00232775 | 0.31180326 | 0.313105965 | 0.503568424 |
| cg17691988 | PAPSS1   | 4  | 0.02041679 | 0.27817674 | 0.23621349  | 0.387622547 |
| cg26541780 | PAQR6;P/ | 1  | 0.01820811 | 0.25910187 | 0.227511773 | 0.360967749 |
| cg14150803 | PARK7;PA | 1  | 0.00575746 | 0.24035348 | 0.239194261 | 0.349598866 |
| cg00734683 | PARP3;PA | 3  | 0.00087864 | 0.64175256 | 0.673506197 | 0.784980604 |
| cg13518121 | PARVA    | 11 | 0.00911882 | 0.24959089 | 0.22028023  | 0.483281147 |
| cg16634971 | PARVA    | 11 | 0.00758031 | 0.26185921 | 0.249650595 | 0.452068906 |
| cg08647724 | PARVA    | 11 | 0.00804549 | 0.18597131 | 0.179048767 | 0.29411986  |
| cg15123662 | PARVA    | 11 | 0.00155548 | 0.30159541 | 0.281082177 | 0.427451911 |
| cg13959831 | PAX5     | 9  | 0.02562377 | 0.18043297 | 0.154143539 | 0.29515627  |
| cg14293548 | PAX6;PA  | 11 | 0.01783758 | 0.59982208 | 0.594067927 | 0.707110952 |
| cg05923681 | PBRM1;P  | 3  | 0.00195549 | 0.54166513 | 0.593895059 | 0.720924371 |
| cg15937861 | PC;PC;PC | 11 | 0.00263648 | 0.27256935 | 0.262043118 | 0.471811574 |
| cg15784784 | PC;PC;PC | 11 | 0.00205127 | 0.60823074 | 0.600196498 | 0.719767676 |
| cg06467504 | PC;PC;PC | 11 | 0.01678972 | 0.28021398 | 0.279304009 | 0.394207927 |
| cg23022313 | PC;PC;PC | 11 | 0.00937895 | 0.1983714  | 0.197770058 | 0.311829148 |
| cg11194398 | PC;PC;PC | 11 | 0.01159878 | 0.1990814  | 0.204734232 | 0.36927043  |
| cg06022884 | PCCB     | 3  | 0.0026628  | 0.49915902 | 0.526062369 | 0.680084779 |
| cg00160440 | PCDH10   | 4  | 0.0008947  | 0.24091029 | 0.343208832 | 0.544199432 |
| cg18869485 | PCDHGA4  | 5  | 0.00873119 | 0.50900068 | 0.568989256 | 0.677508222 |
| cg03415916 | PCDHGA4  | 5  | 0.02957954 | 0.50422089 | 0.537742791 | 0.650780837 |

|            |          |    |            |            |             |             |
|------------|----------|----|------------|------------|-------------|-------------|
| cg16056164 | PCNXL2   | 1  | 0.00382061 | 0.1386362  | 0.142469327 | 0.278291727 |
| cg04105230 | PCSK6;PC | 15 | 0.03157474 | 0.62188426 | 0.631757078 | 0.755256528 |
| cg19316405 | PDDC1    | 11 | 0.00197403 | 0.25541398 | 0.25188094  | 0.48479607  |
| cg10856894 | PDE10A;F | 6  | 0.03468727 | 0.37745569 | 0.27234599  | 0.497078277 |
| cg05034374 | PDE11A;F | 2  | 0.00521564 | 0.24886823 | 0.226812312 | 0.475701284 |
| cg05691871 | PDE4D;PI | 5  | 0.00376781 | 0.69325603 | 0.705143897 | 0.82344057  |
| cg25317315 | PDE4DIP; | 1  | 0.00202182 | 0.27235754 | 0.298621544 | 0.452124486 |
| cg10872815 | PDE7B    | 6  | 0.00725225 | 0.29415901 | 0.269895635 | 0.440175775 |
| cg22835523 | PDE8A;PI | 15 | 0.00276855 | 0.62055539 | 0.62789854  | 0.728067873 |
| cg08835985 | PDF;COG; | 16 | 0.0018345  | 0.30154531 | 0.241104012 | 0.476041143 |
| cg23496331 | PDGFRB   | 5  | 0.01113996 | 0.37005203 | 0.334217972 | 0.482222402 |
| cg07576186 | PDHB     | 3  | 0.00483111 | 0.33898761 | 0.448938306 | 0.591231008 |
| cg10093934 | PDK1     | 2  | 0.00384818 | 0.34111576 | 0.398761103 | 0.570627536 |
| cg20714347 | PDLIM1   | 10 | 0.00353204 | 0.31195608 | 0.353241031 | 0.508377109 |
| cg07262247 | PDLIM4;F | 5  | 0.01823439 | 0.28161111 | 0.252372408 | 0.381886599 |
| cg23976221 | PDLIM5;F | 4  | 0.00408296 | 0.22750042 | 0.185327708 | 0.355679732 |
| cg27650985 | PDLIM7;F | 5  | 0.00653182 | 0.50664004 | 0.497711577 | 0.614175693 |
| cg17037976 | PDLIM7;F | 5  | 0.00911882 | 0.29395912 | 0.283426211 | 0.399165038 |
| cg09972454 | PDXDC1   | 16 | 0.00661882 | 0.35176714 | 0.349054863 | 0.481296778 |
| cg14906976 | PDXK     | 21 | 0.00243695 | 0.215175   | 0.176241541 | 0.368404196 |
| cg11565786 | PDZD2    | 5  | 0.00169556 | 0.63390002 | 0.685811593 | 0.797725214 |
| cg18410110 | PDZD2    | 5  | 0.00233284 | 0.20465168 | 0.226178303 | 0.35773222  |
| cg02529095 | PDZD7    | 10 | 0.00658735 | 0.43925975 | 0.446272215 | 0.590977703 |
| cg05593775 | PDZD7    | 10 | 0.00381594 | 0.14822021 | 0.147950341 | 0.26815728  |
| cg09437460 | PDZD8    | 10 | 0.02895902 | 0.35441716 | 0.39065424  | 0.529117706 |
| cg13019092 | PDZK1    | 1  | 0.00130383 | 0.27498037 | 0.324121773 | 0.501182343 |
| cg10321723 | PDZK1    | 1  | 0.00318268 | 0.20399091 | 0.218758958 | 0.31936744  |
| cg07810156 | PDZK1IP1 | 1  | 0.00307424 | 0.27373598 | 0.233808114 | 0.420160309 |
| cg25688523 | PDZRN3   | 3  | 0.00142706 | 0.3049934  | 0.360115165 | 0.514184732 |
| cg13050115 | PDZRN3   | 3  | 0.002727   | 0.411668   | 0.44617683  | 0.680758373 |
| cg12584826 | PDZRN3   | 3  | 0.00401281 | 0.36962821 | 0.411500958 | 0.545962957 |
| cg01826056 | PDZRN4;F | 12 | 0.0070644  | 0.51212936 | 0.509113617 | 0.612290019 |
| cg15534461 | PEBP1    | 12 | 0.00499723 | 0.41353266 | 0.39731249  | 0.548054453 |
| cg13521002 | PEBP4    | 8  | 0.00134844 | 0.37451433 | 0.428421394 | 0.59606439  |
| cg21932360 | PEBP4    | 8  | 0.00958999 | 0.49319333 | 0.505065549 | 0.610937192 |
| cg18050520 | PEBP4    | 8  | 0.02494466 | 0.2117841  | 0.156805795 | 0.315337768 |
| cg25392325 | PEMT;PEI | 17 | 0.00279729 | 0.2679462  | 0.261616004 | 0.456660865 |
| cg26177311 | PEMT;PEI | 17 | 0.00414415 | 0.12575103 | 0.132108654 | 0.26215135  |
| cg12308675 | PER2     | 2  | 0.00154265 | 0.46594959 | 0.440624328 | 0.694211365 |
| cg22879834 | PER2     | 2  | 0.00291825 | 0.37632687 | 0.38331856  | 0.567581488 |
| cg07719617 | PER2     | 2  | 0.00308097 | 0.31100487 | 0.318630315 | 0.484287343 |
| cg25514503 | PER3     | 1  | 0.02878476 | 0.31059517 | 0.316045463 | 0.435110485 |
| cg09327610 | PER3     | 1  | 0.00401796 | 0.29128929 | 0.366731184 | 0.557062773 |
| cg25821223 | PERP     | 6  | 0.0011159  | 0.35801045 | 0.466091102 | 0.600662571 |
| cg24524895 | PEX11A   | 15 | 0.01966537 | 0.33270703 | 0.296202893 | 0.486509555 |
| cg08745329 | PFKFB3   | 10 | 0.0042395  | 0.31041389 | 0.305146129 | 0.462151724 |

|            |           |    |            |            |             |             |
|------------|-----------|----|------------|------------|-------------|-------------|
| cg08500510 | PFKFB3    | 10 | 0.00197986 | 0.16419783 | 0.146413568 | 0.418310149 |
| cg03124510 | PFKFB3    | 10 | 0.00216509 | 0.19630667 | 0.170171772 | 0.437060448 |
| cg08289056 | PFKFB3    | 10 | 0.00076471 | 0.43397789 | 0.571524984 | 0.685712307 |
| cg13782176 | PFKFB3;P  | 10 | 0.00129758 | 0.47608834 | 0.491146141 | 0.654833203 |
| cg19084628 | PFKFB3;P  | 10 | 0.00219711 | 0.2942995  | 0.31680953  | 0.496312468 |
| cg07102808 | PFKFB3;P  | 10 | 0.0011104  | 0.22843727 | 0.2650601   | 0.439311846 |
| cg00373371 | PFKFB3;P  | 10 | 0.00303542 | 0.42936273 | 0.445897803 | 0.551233471 |
| cg08568670 | PFKFB4    | 3  | 0.00756169 | 0.39451735 | 0.479667431 | 0.624391731 |
| cg09274658 | PFKL;PFKI | 21 | 0.00141699 | 0.23002701 | 0.250918305 | 0.363901937 |
| cg04643920 | PFKL;PFKI | 21 | 0.00271218 | 0.22336071 | 0.240893012 | 0.354909292 |
| cg16324184 | PFKP      | 10 | 0.00514    | 0.64816976 | 0.628990798 | 0.748326651 |
| cg12265908 | PFKP      | 10 | 0.00855749 | 0.31087303 | 0.308630813 | 0.463500558 |
| cg16963373 | PFKP      | 10 | 0.01237003 | 0.38088193 | 0.374820063 | 0.487826166 |
| cg12303582 | PFKP      | 10 | 0.00403008 | 0.21725749 | 0.222279717 | 0.355163734 |
| cg01287088 | PFN3      | 5  | 0.01236318 | 0.2763359  | 0.249480364 | 0.383663286 |
| cg05888583 | PGBD5     | 1  | 0.00422785 | 0.31832786 | 0.270630172 | 0.42632247  |
| cg27224809 | PGBD5     | 1  | 0.00328556 | 0.38949409 | 0.334499753 | 0.536282911 |
| cg04026948 | PGCP      | 8  | 0.00539963 | 0.18340458 | 0.228525939 | 0.422991354 |
| cg22624827 | PGM1      | 1  | 0.02499377 | 0.28013945 | 0.329434387 | 0.454870732 |
| cg04839673 | PGM1      | 1  | 0.00099274 | 0.40945676 | 0.483349122 | 0.67379782  |
| cg03891302 | PHACTR1   | 6  | 0.00253062 | 0.57778173 | 0.621260487 | 0.778637328 |
| cg17586302 | PHACTR2   | 6  | 0.00279494 | 0.13313328 | 0.135275744 | 0.240655197 |
| cg08482167 | PHACTR2   | 6  | 0.00436875 | 0.22145938 | 0.233538192 | 0.46499451  |
| cg06953325 | PHC2      | 1  | 0.01964774 | 0.54359153 | 0.547240689 | 0.649275247 |
| cg24691891 | PHC2      | 1  | 0.00556197 | 0.19243322 | 0.189076637 | 0.36055468  |
| cg00582531 | PHF15     | 5  | 0.00279997 | 0.57827886 | 0.58596408  | 0.702342991 |
| cg13471712 | PHF21A;F  | 11 | 0.00078196 | 0.44391158 | 0.495755753 | 0.601918286 |
| cg16220788 | PHF21A;F  | 11 | 0.00494232 | 0.19034045 | 0.227225799 | 0.425082452 |
| cg06763568 | PHGDH     | 1  | 0.00457305 | 0.33471691 | 0.321997836 | 0.470263699 |
| cg19818271 | PHTF2;P   | 7  | 0.01179846 | 0.17063933 | 0.200648708 | 0.30609934  |
| cg05036615 | PHTF2;P   | 7  | 0.02944061 | 0.30987862 | 0.298990945 | 0.425909564 |
| cg13613439 | PHYHD1;I  | 9  | 0.01317021 | 0.39682716 | 0.392304458 | 0.554915135 |
| cg12083852 | PI4KB     | 1  | 0.00198593 | 0.31700827 | 0.330891147 | 0.467773513 |
| cg07926644 | PIAS4     | 19 | 0.00854289 | 0.35263707 | 0.311137846 | 0.488753523 |
| cg24200175 | PICALM;F  | 11 | 0.02496653 | 0.25355896 | 0.231520728 | 0.414655562 |
| cg16760049 | PICK1;PIC | 22 | 0.00539451 | 0.51088129 | 0.530721404 | 0.64600851  |
| cg24859236 | PIK3CD    | 1  | 0.00209789 | 0.1865202  | 0.182068953 | 0.322623543 |
| cg17725019 | PIK3IP1;P | 22 | 0.00263125 | 0.25866266 | 0.257314234 | 0.486167813 |
| cg01394255 | PIK3R5;PI | 17 | 0.00344865 | 0.53253156 | 0.517188647 | 0.655960468 |
| cg17609282 | PION      | 7  | 0.01174492 | 0.7254037  | 0.713230822 | 0.841508818 |
| cg19397801 | PIP4K2A   | 10 | 0.0039383  | 0.3072699  | 0.423782936 | 0.635067629 |
| cg11327029 | PIP4K2A   | 10 | 0.00104452 | 0.31845253 | 0.411117566 | 0.689157304 |
| cg03771739 | PIP4K2A   | 10 | 0.00065949 | 0.31568576 | 0.549544671 | 0.666393312 |
| cg13995193 | PIP5K1C   | 19 | 0.00167255 | 0.40719291 | 0.421034374 | 0.566402969 |
| cg19841005 | PIP5K1C   | 19 | 0.00116286 | 0.17341787 | 0.195167435 | 0.304455898 |
| cg12148647 | PIP5K1C   | 19 | 0.00159949 | 0.16499905 | 0.222843799 | 0.326743826 |

|            |          |    |            |            |             |             |
|------------|----------|----|------------|------------|-------------|-------------|
| cg04965671 | PISD     | 22 | 0.00878866 | 0.31715319 | 0.29456732  | 0.507672549 |
| cg07284476 | PITPNC1; | 17 | 0.00312811 | 0.63478825 | 0.683704098 | 0.793597652 |
| cg13037550 | PITPNM2  | 12 | 0.00510852 | 0.56070016 | 0.596481425 | 0.730141897 |
| cg05399718 | PITPNM2  | 12 | 0.00107365 | 0.2294389  | 0.233951393 | 0.437858512 |
| cg24389239 | PITPNM3  | 17 | 0.0050337  | 0.63537686 | 0.638069103 | 0.739546836 |
| cg12020444 | PIWIL1   | 12 | 0.01163705 | 0.55977986 | 0.552121021 | 0.665597529 |
| cg05598886 | PKD1;MIF | 16 | 0.00334886 | 0.66584018 | 0.619236882 | 0.777053275 |
| cg19949931 | PKD1;MIF | 16 | 0.01529615 | 0.42536629 | 0.410424817 | 0.575208339 |
| cg07568117 | PKD1;PKI | 16 | 0.00152023 | 0.65789048 | 0.662027642 | 0.799895514 |
| cg27227497 | PKD1;PKI | 16 | 0.00663932 | 0.22965886 | 0.225130511 | 0.402850473 |
| cg03494430 | PKD1;PKI | 16 | 0.00439624 | 0.2446409  | 0.224595102 | 0.402178719 |
| cg10731848 | PKD1L1   | 7  | 0.0048909  | 0.21386324 | 0.198536174 | 0.439008455 |
| cg27618305 | PKD1L1   | 7  | 0.00883809 | 0.17293915 | 0.144952707 | 0.275760363 |
| cg02735620 | PKD2     | 4  | 0.00422345 | 0.50014615 | 0.467195093 | 0.680091015 |
| cg12078253 | PKDCC    | 2  | 0.03749859 | 0.30381156 | 0.292356844 | 0.438229257 |
| cg07565018 | PKM2;PKI | 15 | 0.00667367 | 0.22774041 | 0.17158805  | 0.393862835 |
| cg02742281 | PKMYT1;I | 16 | 0.00200001 | 0.34616179 | 0.288075241 | 0.516250389 |
| cg01243773 | PKNOX2   | 11 | 0.00855749 | 0.223106   | 0.193431427 | 0.381699865 |
| cg15727708 | PKNOX2   | 11 | 0.00152273 | 0.54528092 | 0.53681024  | 0.666030394 |
| cg13168187 | PKP4;PKP | 2  | 0.00092985 | 0.31689471 | 0.395685867 | 0.618668568 |
| cg13211559 | PLA2G2A  | 1  | 0.00218837 | 0.40829731 | 0.3500685   | 0.524550903 |
| cg02203881 | PLA2G4D  | 15 | 0.02151984 | 0.3179537  | 0.318725066 | 0.424111928 |
| cg21776667 | PLAGL1;P | 6  | 0.03502867 | 0.25393475 | 0.289131118 | 0.391239562 |
| cg23120601 | PLCB2    | 15 | 0.00262867 | 0.25685909 | 0.217044086 | 0.383657656 |
| cg09233429 | PLCB2    | 15 | 0.00352383 | 0.29113978 | 0.243194734 | 0.393099804 |
| cg20484832 | PLCB4;PL | 20 | 0.00546612 | 0.74512567 | 0.754557303 | 0.85808337  |
| cg13506485 | PLCE1    | 10 | 0.03384214 | 0.18926019 | 0.180072129 | 0.298613377 |
| cg27638309 | PLCE1;PL | 10 | 0.03817436 | 0.3586983  | 0.256839845 | 0.4612736   |
| cg00940248 | PLCG2    | 16 | 0.04459242 | 0.3004198  | 0.252689195 | 0.416584092 |
| cg21767191 | PLCL2;PL | 3  | 0.00714809 | 0.69867485 | 0.675681297 | 0.801195145 |
| cg02681842 | PLEC1;PL | 8  | 0.00896808 | 0.17916161 | 0.161418998 | 0.307432251 |
| cg17082405 | PLEC1;PL | 8  | 0.00219764 | 0.12828809 | 0.107241766 | 0.27504109  |
| cg20680163 | PLEC1;PL | 8  | 0.01329117 | 0.17463804 | 0.13829554  | 0.286742881 |
| cg05141333 | PLEC1;PL | 8  | 0.00204964 | 0.47587437 | 0.500845831 | 0.605922104 |
| cg07598407 | PLEC1;PL | 8  | 0.00574743 | 0.30687035 | 0.302054703 | 0.429847256 |
| cg03537810 | PLEC1;PL | 8  | 0.00252124 | 0.37113607 | 0.35973539  | 0.478405535 |
| cg07132086 | PLEKHA2  | 8  | 0.03352901 | 0.26792644 | 0.252716884 | 0.421187179 |
| cg19755459 | PLEKHA5; | 12 | 0.01751915 | 0.31584021 | 0.342242348 | 0.461258614 |
| cg11131599 | PLEKHA6  | 1  | 0.00081925 | 0.41017906 | 0.543973333 | 0.656519764 |
| cg15306794 | PLEKHA7  | 11 | 0.01195883 | 0.36340497 | 0.387714877 | 0.559520805 |
| cg22309568 | PLEKHF1  | 19 | 0.02595684 | 0.3104935  | 0.272173199 | 0.424298708 |
| cg08445687 | PLEKHF1  | 19 | 0.00076471 | 0.15823672 | 0.181954744 | 0.360122004 |
| cg12063688 | PLEKHG3  | 14 | 0.00218597 | 0.15966075 | 0.157151528 | 0.305834483 |
| cg07942500 | PLEKHG3  | 14 | 0.00170239 | 0.15934798 | 0.161074867 | 0.299126107 |
| cg11802553 | PLEKHG3  | 14 | 0.00207771 | 0.38589228 | 0.401196975 | 0.560121296 |
| cg06426253 | PLEKHG4; | 16 | 0.00147208 | 0.63637366 | 0.650201652 | 0.772648486 |



|            |           |    |            |            |             |             |
|------------|-----------|----|------------|------------|-------------|-------------|
| cg23462129 | PLEKHG4   | 5  | 0.01206219 | 0.57367696 | 0.600161738 | 0.703377547 |
| cg02815014 | PLEKHM3   | 2  | 0.0012785  | 0.60210687 | 0.574943944 | 0.752165013 |
| cg26232945 | PLEKHM3   | 2  | 0.00602378 | 0.19997147 | 0.199062062 | 0.397541064 |
| cg18778727 | PLSCR1    | 3  | 0.02389893 | 0.3798257  | 0.443208312 | 0.548441267 |
| cg18686270 | PLSCR1    | 3  | 0.02089413 | 0.67588044 | 0.668926508 | 0.777860169 |
| cg03631457 | PLXDC2    | 10 | 0.00169556 | 0.43996504 | 0.491903459 | 0.654060119 |
| cg12723985 | PLXDC2    | 10 | 0.00802316 | 0.40589773 | 0.417531912 | 0.570530693 |
| cg11546777 | PLXDC2    | 10 | 0.00365165 | 0.33107413 | 0.435060059 | 0.572083115 |
| cg24161018 | PLXNA4    | 7  | 0.0008696  | 0.41034353 | 0.4732683   | 0.678617292 |
| cg11602148 | PLXNB1;F  | 3  | 0.00157567 | 0.47005319 | 0.485333    | 0.718416488 |
| cg16357930 | PLXNB1;F  | 3  | 0.00165724 | 0.35892793 | 0.362771234 | 0.52992137  |
| cg09837648 | PLXNB1;F  | 3  | 0.00068904 | 0.25299715 | 0.345595089 | 0.528274906 |
| cg10698910 | PLXNB2    | 22 | 0.00667841 | 0.39791394 | 0.395628888 | 0.506304751 |
| cg27206976 | PLXNB2    | 22 | 0.00119385 | 0.26974409 | 0.312784895 | 0.441530627 |
| cg12349580 | PLXNC1    | 12 | 0.00262388 | 0.39495637 | 0.401570617 | 0.563781651 |
| cg07078269 | PLXND1    | 3  | 0.00092849 | 0.36251665 | 0.429292206 | 0.640906836 |
| cg27353085 | PLXND1    | 3  | 0.00248169 | 0.26668655 | 0.305425649 | 0.507995167 |
| cg05490233 | PLXND1    | 3  | 0.00319723 | 0.41284198 | 0.424450437 | 0.554708843 |
| cg07908223 | PMEPA1;   | 20 | 0.00214604 | 0.31898343 | 0.359490519 | 0.563801308 |
| cg05355067 | PMEPA1;   | 20 | 0.00186474 | 0.21083678 | 0.200422197 | 0.367920957 |
| cg00177431 | PMEPA1;   | 20 | 0.02152265 | 0.19173718 | 0.192245742 | 0.344068144 |
| cg11858564 | PNMA1;C   | 14 | 0.03514972 | 0.65483702 | 0.65110734  | 0.773903665 |
| cg27178772 | PNRC1     | 6  | 0.00213077 | 0.33826783 | 0.361167848 | 0.525919548 |
| cg14522034 | POFUT2;F  | 21 | 0.00384078 | 0.18686557 | 0.165085771 | 0.288149678 |
| cg23694811 | POGK      | 1  | 0.00935896 | 0.37553578 | 0.411571093 | 0.521324273 |
| cg01444413 | POGZ;PO   | 1  | 0.01221904 | 0.56340531 | 0.576868145 | 0.711136176 |
| cg07274204 | POL3S     | 16 | 0.00243678 | 0.44577186 | 0.356723983 | 0.55781987  |
| cg27197524 | POLE      | 12 | 0.00141191 | 0.59537273 | 0.573109459 | 0.791924877 |
| cg20361429 | POLE      | 12 | 0.00103895 | 0.58010467 | 0.577145015 | 0.788364809 |
| cg24940701 | POLR2E    | 19 | 0.00147208 | 0.69702939 | 0.705912752 | 0.826903448 |
| cg13859108 | POM121C   | 7  | 0.00425007 | 0.29207384 | 0.238163917 | 0.451867694 |
| cg04089800 | POMGNT    | 1  | 0.02681286 | 0.16495654 | 0.140397363 | 0.269454438 |
| cg04270402 | PON2;PO   | 7  | 0.01698967 | 0.4288896  | 0.444595681 | 0.551467248 |
| cg18397073 | POU2F2    | 19 | 0.01479868 | 0.23669632 | 0.19363645  | 0.356100917 |
| cg11682697 | PPAP2B;F  | 1  | 0.00140062 | 0.09190934 | 0.099673994 | 0.204540578 |
| cg15896446 | PPAPDC1   | 10 | 0.00804549 | 0.4587011  | 0.454502863 | 0.591512439 |
| cg13436417 | PPAPDC1   | 10 | 0.00556197 | 0.26882197 | 0.26895388  | 0.378386249 |
| cg21286173 | PPAPDC1   | 8  | 0.00219764 | 0.21590282 | 0.235057563 | 0.45774463  |
| cg22185879 | PPDPF     | 20 | 0.00317466 | 0.22719266 | 0.227818805 | 0.360176448 |
| cg12652780 | PPFIA1;PI | 11 | 0.00337131 | 0.25788714 | 0.254866696 | 0.396784828 |
| cg10952234 | PPFIA4;PI | 1  | 0.00091059 | 0.3562958  | 0.405181238 | 0.541010339 |
| cg24000087 | PPFIA4;PI | 1  | 0.00142706 | 0.30367631 | 0.341204831 | 0.488771923 |
| cg04375036 | PPP1CC    | 12 | 0.00336646 | 0.29010803 | 0.286511935 | 0.435310041 |
| cg03596877 | PPP1R10   | 6  | 0.01110735 | 0.39541063 | 0.422234512 | 0.526719462 |
| cg26058884 | PPP1R10   | 6  | 0.00921039 | 0.2609847  | 0.195670436 | 0.382092016 |
| cg08067969 | PPP1R13I  | 14 | 0.00398122 | 0.35813309 | 0.343913599 | 0.552368814 |

|            |          |    |            |            |             |             |
|------------|----------|----|------------|------------|-------------|-------------|
| cg06398396 | PPP1R16; | 8  | 0.00075458 | 0.31573184 | 0.349764972 | 0.456351339 |
| cg18354248 | PPP1R3C  | 10 | 0.02735855 | 0.16887801 | 0.149007129 | 0.289598932 |
| cg24288527 | PPP1R3C  | 10 | 0.00579556 | 0.20827181 | 0.193432928 | 0.327713156 |
| cg25409308 | PPP2R1B  | 11 | 0.00295256 | 0.47306315 | 0.526506624 | 0.642384014 |
| cg03723716 | PPP2R1B; | 11 | 0.04180327 | 0.18702022 | 0.166455899 | 0.304016729 |
| cg14823825 | PPP2R2A  | 8  | 0.03223944 | 0.43203244 | 0.470999725 | 0.585050597 |
| cg02265810 | PPP2R2D  | 10 | 0.00206218 | 0.44989177 | 0.466309723 | 0.707712407 |
| cg15444217 | PPP2R2D  | 10 | 0.01561358 | 0.59774031 | 0.630647351 | 0.738774817 |
| cg15102070 | PPP2R2D  | 10 | 0.00094183 | 0.53809551 | 0.569570413 | 0.689566048 |
| cg03072003 | PPP2R2D  | 10 | 0.00318584 | 0.24211949 | 0.247496757 | 0.385664482 |
| cg13845634 | PPY      | 17 | 0.00449495 | 0.50629849 | 0.53079741  | 0.637803029 |
| cg02710481 | PQLC1;PC | 18 | 0.00317183 | 0.27307374 | 0.188890139 | 0.384985307 |
| cg13448468 | PRDM11   | 11 | 0.00245827 | 0.23283614 | 0.252239415 | 0.397384571 |
| cg00328729 | PRDM11   | 11 | 0.01907089 | 0.23217792 | 0.239771495 | 0.35771602  |
| cg15619820 | PRDM16;  | 1  | 0.00274286 | 0.24555427 | 0.248760022 | 0.431272407 |
| cg22720392 | PRDM16;  | 1  | 0.00177922 | 0.19662409 | 0.214895627 | 0.382281094 |
| cg25153629 | PRDM16;  | 1  | 0.00220808 | 0.42401515 | 0.425034656 | 0.622875977 |
| cg22497969 | PRDM16;  | 1  | 0.00130383 | 0.13217033 | 0.13533609  | 0.344132447 |
| cg04855369 | PRDM16;  | 1  | 0.00279686 | 0.26833497 | 0.242617888 | 0.416142978 |
| cg11392550 | PRDM16;  | 1  | 0.00273943 | 0.22272221 | 0.252265905 | 0.431395446 |
| cg19263228 | PRDM16;  | 1  | 0.00338778 | 0.1799868  | 0.191017376 | 0.311898095 |
| cg17601209 | PRDM16;  | 1  | 0.00550622 | 0.30678688 | 0.347511675 | 0.499855026 |
| cg26520908 | PRDM16;  | 1  | 0.0073123  | 0.22352269 | 0.229780556 | 0.341875688 |
| cg00894041 | PRDM16;  | 1  | 0.00889507 | 0.22062033 | 0.207519807 | 0.337676619 |
| cg11138362 | PRDM16;  | 1  | 0.00068904 | 0.13893301 | 0.213123209 | 0.315540995 |
| cg14712575 | PRDM16;  | 1  | 0.00154265 | 0.45760175 | 0.474631007 | 0.622488911 |
| cg06911744 | PRDM16;  | 1  | 0.00154265 | 0.2714533  | 0.33592814  | 0.516129845 |
| cg26938014 | PRDM6    | 5  | 0.00993101 | 0.46294232 | 0.494507751 | 0.630038558 |
| cg19644991 | PRDM6    | 5  | 0.00387834 | 0.43229943 | 0.519059169 | 0.660759528 |
| cg03311556 | PRDM8    | 4  | 0.00087298 | 0.28760765 | 0.390318091 | 0.59491434  |
| cg01789499 | PRDM8    | 4  | 0.0019386  | 0.16841359 | 0.174711258 | 0.295759229 |
| cg09595050 | PRDM8    | 4  | 0.00079883 | 0.33829421 | 0.379605577 | 0.493513814 |
| cg06440348 | PRDM8    | 4  | 0.00249039 | 0.32392139 | 0.349747107 | 0.507810077 |
| cg05452645 | PRDM8;P  | 4  | 0.00066232 | 0.21910546 | 0.296982233 | 0.434586395 |
| cg00138041 | PRDM8;P  | 4  | 0.00065949 | 0.20963815 | 0.272097207 | 0.414311555 |
| cg19409579 | PRDM8;P  | 4  | 0.00246645 | 0.11280971 | 0.125756515 | 0.243362741 |
| cg02732915 | PRDM8;P  | 4  | 0.01021212 | 0.4344348  | 0.521964113 | 0.675941789 |
| cg02941135 | PRDM8;P  | 4  | 0.0113009  | 0.50255521 | 0.603894373 | 0.715398421 |
| cg10880006 | PRDM8;P  | 4  | 0.00774063 | 0.18512407 | 0.199156643 | 0.336097301 |
| cg05522011 | PRDM8;P  | 4  | 0.00148902 | 0.34693957 | 0.420288285 | 0.570366342 |
| cg06989253 | PRDX1;PF | 1  | 0.00425638 | 0.18376734 | 0.162556456 | 0.291540125 |
| cg05889294 | PRELP;PR | 1  | 0.0113406  | 0.1891543  | 0.19338481  | 0.308097813 |
| cg19752143 | PREPL;PR | 2  | 0.04791139 | 0.36894911 | 0.342176215 | 0.493961965 |
| cg00555268 | PRIC285  | 20 | 0.01580766 | 0.29425016 | 0.287504979 | 0.410823293 |
| cg11409510 | PRICKLE1 | 12 | 0.01026108 | 0.58777416 | 0.630143193 | 0.744475134 |
| cg03190018 | PRKAG2;f | 7  | 0.00141191 | 0.3104136  | 0.28958745  | 0.537073995 |

|            |          |    |            |            |             |             |
|------------|----------|----|------------|------------|-------------|-------------|
| cg22719878 | PRKAG2;f | 7  | 0.00107365 | 0.39221776 | 0.443136984 | 0.59194616  |
| cg27577993 | PRKAG2;f | 7  | 0.0135118  | 0.22883494 | 0.191502401 | 0.411887185 |
| cg17814717 | PRKAG2;f | 7  | 0.01151933 | 0.29538013 | 0.285041718 | 0.418821452 |
| cg26482626 | PRKAG2;f | 7  | 0.00099274 | 0.37190729 | 0.437755584 | 0.573664925 |
| cg26284782 | PRKAG2;f | 7  | 0.00073547 | 0.17538171 | 0.225424488 | 0.411983904 |
| cg09397579 | PRKAG2;f | 7  | 0.00183351 | 0.21108391 | 0.223452253 | 0.344958793 |
| cg11315991 | PRKAR1B  | 7  | 0.00366802 | 0.37491434 | 0.418739229 | 0.593977227 |
| cg06878741 | PRKAR1B  | 7  | 0.00226669 | 0.33319304 | 0.341783759 | 0.50821507  |
| cg18241094 | PRKAR1B  | 7  | 0.00444287 | 0.22970653 | 0.228926145 | 0.364664237 |
| cg04666346 | PRKAR1B  | 7  | 0.01677529 | 0.2093989  | 0.189431001 | 0.328569983 |
| cg21150288 | PRKAR1B  | 7  | 0.00521564 | 0.5190511  | 0.534672325 | 0.674955802 |
| cg04191989 | PRKAR1B  | 7  | 0.01276611 | 0.27647838 | 0.242729782 | 0.416634895 |
| cg06413196 | PRKAR1B  | 7  | 0.01725665 | 0.18873383 | 0.160737765 | 0.302106178 |
| cg03719152 | PRKAR1B  | 7  | 0.01291157 | 0.19392599 | 0.172723761 | 0.344223533 |
| cg01462184 | PRKAR1B  | 7  | 0.0048909  | 0.12986675 | 0.132595569 | 0.233508947 |
| cg10127554 | PRKAR1B  | 7  | 0.00077468 | 0.45370671 | 0.520132129 | 0.644729953 |
| cg16581738 | PRKAR1B  | 7  | 0.00081789 | 0.43164228 | 0.506441531 | 0.734248361 |
| cg27418434 | PRKAR1B  | 7  | 0.0013661  | 0.31440448 | 0.318191584 | 0.479706094 |
| cg01477379 | PRKCA    | 17 | 0.01299988 | 0.21112688 | 0.204513691 | 0.356670481 |
| cg14121185 | PRKCA    | 17 | 0.00820044 | 0.20246892 | 0.245380902 | 0.35015529  |
| cg19325477 | PRKCA    | 17 | 0.01032661 | 0.64244054 | 0.555896822 | 0.761329276 |
| cg02699518 | PRKCA    | 17 | 0.00322924 | 0.45834938 | 0.448074093 | 0.655376849 |
| cg24171047 | PRKCA    | 17 | 0.01463726 | 0.61121595 | 0.633358494 | 0.74244023  |
| cg09655520 | PRKCA    | 17 | 0.00099274 | 0.45902831 | 0.471141908 | 0.716420846 |
| cg22632947 | PRKCA    | 17 | 0.01373528 | 0.38434757 | 0.416428209 | 0.523605425 |
| cg10460643 | PRKCD;PF | 3  | 0.00073118 | 0.34756875 | 0.405972766 | 0.560176752 |
| cg15035324 | PRKCE    | 2  | 0.01705178 | 0.34124382 | 0.376793351 | 0.519388301 |
| cg24545602 | PRKCE    | 2  | 0.03502867 | 0.33808639 | 0.270710098 | 0.458272459 |
| cg00409434 | PRKCE    | 2  | 0.01145563 | 0.39913565 | 0.421069438 | 0.589380749 |
| cg15505219 | PRKCH    | 14 | 0.01309134 | 0.41689646 | 0.388100556 | 0.572149409 |
| cg24447775 | PRKCZ    | 1  | 0.00701147 | 0.42366148 | 0.439503601 | 0.542046968 |
| cg06176608 | PRKCZ;PR | 1  | 0.01281774 | 0.38672253 | 0.374868102 | 0.49035992  |
| cg00409816 | PRKCZ;PR | 1  | 0.00137043 | 0.5927351  | 0.582889724 | 0.760170047 |
| cg00981070 | PRKCZ;PR | 1  | 0.01317683 | 0.32416111 | 0.322425806 | 0.442855657 |
| cg09179248 | PRKCZ;PR | 1  | 0.00756169 | 0.24516892 | 0.24206268  | 0.387204803 |
| cg07836663 | PRKCZ;PR | 1  | 0.00129968 | 0.36766224 | 0.362363309 | 0.487550276 |
| cg00866690 | PRKCZ;PR | 1  | 0.0026668  | 0.32608066 | 0.313071442 | 0.468195638 |
| cg22128985 | PRKCZ;PR | 1  | 0.00207771 | 0.33911093 | 0.362404639 | 0.542414036 |
| cg24578937 | PRKCZ;PR | 1  | 0.00081599 | 0.11253055 | 0.158545526 | 0.258917627 |
| cg02840585 | PRKCZ;PR | 1  | 0.00066232 | 0.39752583 | 0.482415382 | 0.679636204 |
| cg17156349 | PRKCZ;PR | 1  | 0.00334886 | 0.26224464 | 0.298603203 | 0.474418424 |
| cg25727019 | PRKCZ;PR | 1  | 0.00197487 | 0.3392053  | 0.384374023 | 0.546663122 |
| cg22338356 | PRKDC;PF | 8  | 0.01842786 | 0.23146844 | 0.18284814  | 0.351879947 |
| cg15121267 | PRL;PRL  | 6  | 0.00097053 | 0.31582314 | 0.350266628 | 0.507657042 |
| cg11705975 | PRLHR    | 10 | 0.00329066 | 0.21846566 | 0.188153001 | 0.329081745 |
| cg01456572 | PRM3     | 16 | 0.00284268 | 0.29988504 | 0.320323998 | 0.441728512 |

|            |          |    |            |            |             |             |
|------------|----------|----|------------|------------|-------------|-------------|
| cg08358964 | PRM3     | 16 | 0.00953692 | 0.19856679 | 0.198526535 | 0.322439327 |
| cg09196146 | PRO1768  | 14 | 0.00911311 | 0.3196743  | 0.375414624 | 0.486943608 |
| cg25734864 | PROZ     | 13 | 0.01148808 | 0.55750442 | 0.536726222 | 0.662695634 |
| cg23800587 | PROZ     | 13 | 0.00563693 | 0.54873601 | 0.539398062 | 0.659742268 |
| cg12459923 | PRPF6    | 20 | 0.00175545 | 0.37549093 | 0.303068003 | 0.594347925 |
| cg11167993 | PRPF6    | 20 | 0.00220808 | 0.64924629 | 0.497833241 | 0.778975871 |
| cg12155028 | PRR16    | 5  | 0.00320159 | 0.48088702 | 0.41392421  | 0.584644723 |
| cg26995244 | PRR5;PRF | 22 | 0.00227382 | 0.09569346 | 0.120131801 | 0.22023228  |
| cg08123207 | PRRT1    | 6  | 0.00139627 | 0.24134134 | 0.218229229 | 0.391513648 |
| cg19227031 | PRRT1    | 6  | 0.00368543 | 0.30637332 | 0.28192279  | 0.417271434 |
| cg22849665 | PRRT1    | 6  | 0.01026031 | 0.12982147 | 0.132306691 | 0.236693376 |
| cg16040614 | PRRT1    | 6  | 0.00458159 | 0.36368323 | 0.35100708  | 0.505249287 |
| cg20266593 | PRRT1    | 6  | 0.00428303 | 0.29355714 | 0.262977966 | 0.491955847 |
| cg01943851 | PRRT2    | 16 | 0.00297078 | 0.7319372  | 0.705855769 | 0.841807793 |
| cg20094462 | PRTN3    | 19 | 0.00264473 | 0.11055604 | 0.098459507 | 0.2131193   |
| cg13579473 | PSD3     | 8  | 0.02215556 | 0.43512121 | 0.45027069  | 0.606240872 |
| cg24804106 | PSD3     | 8  | 0.01616965 | 0.68730656 | 0.686601075 | 0.789447463 |
| cg09894683 | PSD3;PSC | 8  | 0.01970757 | 0.22187403 | 0.237053752 | 0.392884082 |
| cg03172765 | PSMD1    | 2  | 0.01884035 | 0.55946503 | 0.511118549 | 0.704458519 |
| cg05989984 | PSMD9;W  | 12 | 0.00904235 | 0.5686919  | 0.576318076 | 0.742988895 |
| cg15077193 | PTBP1;PT | 19 | 0.00997311 | 0.14832143 | 0.133077092 | 0.266465814 |
| cg02086742 | PTBP1;PT | 19 | 0.00377759 | 0.61374906 | 0.621010641 | 0.806853005 |
| cg17357561 | PTBP1;PT | 19 | 0.0048909  | 0.30522735 | 0.288025208 | 0.478570604 |
| cg01025800 | PTBP1;PT | 19 | 0.00130383 | 0.48328449 | 0.54221961  | 0.687329371 |
| cg16656493 | PTCRA    | 6  | 0.01240534 | 0.40982162 | 0.385316041 | 0.520566646 |
| cg14914552 | PTDSS1   | 8  | 0.00240535 | 0.50278069 | 0.530883536 | 0.701140275 |
| cg09267188 | PTDSS1   | 8  | 0.00756169 | 0.32999322 | 0.398391345 | 0.499523041 |
| cg24862548 | PTDSS1   | 8  | 0.00513872 | 0.52865769 | 0.523684208 | 0.660657929 |
| cg08251761 | PTDSS2   | 11 | 0.00457044 | 0.42521552 | 0.400851079 | 0.562603494 |
| cg15751198 | PTDSS2   | 11 | 0.0156698  | 0.68980199 | 0.683444971 | 0.792637078 |
| cg10575846 | PTDSS2   | 11 | 0.00124243 | 0.44534192 | 0.449835409 | 0.651332168 |
| cg13712952 | PTENP1   | 9  | 0.01064534 | 0.4762364  | 0.524781747 | 0.655169999 |
| cg12603671 | PTGER3;F | 1  | 0.01910705 | 0.16283783 | 0.133618407 | 0.273774016 |
| cg01311102 | PTGES2;P | 9  | 0.03100155 | 0.48844515 | 0.481673368 | 0.593152693 |
| cg04041000 | PTH1R    | 3  | 0.00219711 | 0.45288121 | 0.40032123  | 0.632351844 |
| cg18707417 | PTH1R    | 3  | 0.00429038 | 0.30691498 | 0.306071012 | 0.466984752 |
| cg00658161 | PTK2B;PT | 8  | 0.00799281 | 0.42632906 | 0.402632839 | 0.533880926 |
| cg02454815 | PTOV1    | 19 | 0.01365382 | 0.70215965 | 0.708620795 | 0.814290357 |
| cg07268431 | PTPN23   | 3  | 0.00430896 | 0.15045305 | 0.153731991 | 0.326039845 |
| cg27234747 | PTPN4    | 2  | 0.01237894 | 0.32858534 | 0.313776544 | 0.502230417 |
| cg04025127 | PTPRF;PT | 1  | 0.00361412 | 0.42623243 | 0.395645193 | 0.53713789  |
| cg13235366 | PTPRF;PT | 1  | 0.00725763 | 0.17539815 | 0.151728587 | 0.293171655 |
| cg18022607 | PTPRG    | 3  | 0.00384078 | 0.59289751 | 0.643779459 | 0.743782543 |
| cg27118533 | PTPRK;PT | 6  | 0.00515613 | 0.15620813 | 0.126930984 | 0.284431261 |
| cg21323106 | PTPRN2;F | 7  | 0.00401824 | 0.42950021 | 0.389587993 | 0.56880896  |
| cg02505956 | PTPRN2;F | 7  | 0.00359753 | 0.39589414 | 0.310873713 | 0.533224569 |

|            |          |    |            |            |             |             |
|------------|----------|----|------------|------------|-------------|-------------|
| cg27572053 | PTPRN2;F | 7  | 0.04054798 | 0.30266805 | 0.333703312 | 0.447692089 |
| cg15085205 | PTPRR    | 12 | 0.01426642 | 0.38733595 | 0.351534425 | 0.509979202 |
| cg13896328 | PTPRU;PT | 1  | 0.00186737 | 0.20209829 | 0.204670107 | 0.358407298 |
| cg26369180 | PUSL1    | 1  | 0.00784239 | 0.56599236 | 0.554233525 | 0.666431759 |
| cg25328384 | PVR;PVR; | 19 | 0.03274223 | 0.24169137 | 0.214725412 | 0.366965129 |
| cg20847701 | PVT1     | 8  | 0.0009934  | 0.11534492 | 0.124775328 | 0.316498264 |
| cg07733247 | PWWP2B   | 10 | 0.00309973 | 0.53611542 | 0.533616834 | 0.651940262 |
| cg14230647 | PXDN     | 2  | 0.01148808 | 0.54305969 | 0.54291169  | 0.649980026 |
| cg20311673 | PXDN     | 2  | 0.00306982 | 0.25704537 | 0.243673408 | 0.401588444 |
| cg21514857 | PXDNL    | 8  | 0.02346534 | 0.23823987 | 0.246269369 | 0.375494219 |
| cg09849967 | QARS     | 3  | 0.00629716 | 0.62735002 | 0.602019695 | 0.747376713 |
| cg13991698 | QSOX1;Q  | 1  | 0.00160732 | 0.567837   | 0.554394607 | 0.701696465 |
| cg23626387 | QSOX1;Q  | 1  | 0.00323646 | 0.17684374 | 0.16284118  | 0.306942497 |
| cg10023454 | QSOX1;Q  | 1  | 0.01373528 | 0.52691661 | 0.5625597   | 0.688660731 |
| cg02363202 | R3HDM2   | 12 | 0.00262147 | 0.38073935 | 0.368658877 | 0.500873233 |
| cg04685747 | RAB11B   | 19 | 0.0252514  | 0.30429489 | 0.303858466 | 0.412356292 |
| cg09962377 | RAB11FIP | 16 | 0.00299664 | 0.17417553 | 0.171440615 | 0.338253442 |
| cg09408143 | RAB11FIP | 16 | 0.0061024  | 0.32280835 | 0.379446076 | 0.480767643 |
| cg05000339 | RAB11FIP | 17 | 0.00092661 | 0.23233434 | 0.271379628 | 0.421587582 |
| cg25709050 | RAB11FIP | 17 | 0.00126804 | 0.22190902 | 0.271543699 | 0.397373952 |
| cg24174232 | RAB11FIP | 17 | 0.00114883 | 0.15352986 | 0.184673406 | 0.329664783 |
| cg01433190 | RAB11FIP | 2  | 0.0156698  | 0.4295882  | 0.434151177 | 0.588134112 |
| cg26881535 | RAB3GAP  | 1  | 0.02507458 | 0.27769462 | 0.23753048  | 0.474178851 |
| cg06755297 | RAB3GAP  | 1  | 0.00670817 | 0.65916575 | 0.661286778 | 0.785435358 |
| cg03349407 | RAB3GAP  | 1  | 0.00367708 | 0.26571347 | 0.292262972 | 0.49249542  |
| cg18573251 | RAB3IL1  | 11 | 0.00630644 | 0.25923978 | 0.222829985 | 0.432969032 |
| cg03828193 | RAB40B   | 17 | 0.0103161  | 0.37643699 | 0.366510226 | 0.504278166 |
| cg06714655 | RAB40C   | 16 | 0.00170239 | 0.62121985 | 0.646265424 | 0.76354759  |
| cg07597022 | RAB40C   | 16 | 0.00197786 | 0.49323528 | 0.49249184  | 0.666782642 |
| cg08524190 | RAB43    | 3  | 0.02628532 | 0.25357966 | 0.224585364 | 0.365399365 |
| cg06459724 | RAB7L1;R | 1  | 0.00670577 | 0.17188148 | 0.153515186 | 0.299736898 |
| cg10098464 | RAB7L1;R | 1  | 0.00893394 | 0.41691976 | 0.398288876 | 0.55427565  |
| cg12019814 | RAD21    | 8  | 0.00461206 | 0.61937907 | 0.580005258 | 0.736872175 |
| cg01197302 | RADIL    | 7  | 0.00703549 | 0.2453173  | 0.19491437  | 0.378177887 |
| cg09856107 | RAF1     | 3  | 0.03674299 | 0.19704966 | 0.214268454 | 0.343957878 |
| cg03461781 | RAGE     | 14 | 0.04897117 | 0.41751726 | 0.40595649  | 0.540519759 |
| cg19147912 | RAI1     | 17 | 0.00088355 | 0.29166078 | 0.288524012 | 0.498822429 |
| cg03791861 | RAI1     | 17 | 0.00077183 | 0.44349559 | 0.490684057 | 0.661997417 |
| cg06775073 | RAI1     | 17 | 0.00151094 | 0.23487381 | 0.231452576 | 0.350568186 |
| cg02147681 | RAI1     | 17 | 0.00993335 | 0.13568826 | 0.143848894 | 0.248864376 |
| cg19447962 | RAI1     | 17 | 0.00065949 | 0.18586097 | 0.27117583  | 0.486592446 |
| cg06685437 | RAI1     | 17 | 0.00588106 | 0.17649019 | 0.16216358  | 0.300632092 |
| cg13658093 | RAI1     | 17 | 0.04180327 | 0.60688405 | 0.629294579 | 0.7312017   |
| cg07505049 | RAI14;RA | 5  | 0.00134844 | 0.55296103 | 0.616747219 | 0.734135683 |
| cg01363736 | RALGAPB  | 20 | 0.00095963 | 0.5509638  | 0.580974463 | 0.80358574  |
| cg14586546 | RALGDS   | 9  | 0.00170239 | 0.218641   | 0.228775783 | 0.372111886 |

|            |           |    |            |            |             |             |
|------------|-----------|----|------------|------------|-------------|-------------|
| cg14541011 | RALGDS;F  | 9  | 0.0012838  | 0.14481244 | 0.153350927 | 0.260157941 |
| cg07213181 | RAMP1     | 2  | 0.02649781 | 0.18639509 | 0.225537695 | 0.332224832 |
| cg14819160 | RAMP1     | 2  | 0.00143537 | 0.18492725 | 0.262858473 | 0.365953513 |
| cg10846682 | RAMP1     | 2  | 0.00472614 | 0.36568476 | 0.31380795  | 0.494610208 |
| cg02909097 | RAP1GAP   | 17 | 0.00100445 | 0.2056647  | 0.238404033 | 0.412614914 |
| cg15070283 | RAP1GAP   | 17 | 0.00455939 | 0.4569044  | 0.451763671 | 0.560217428 |
| cg19458020 | RARA;RAI  | 17 | 0.013012   | 0.1515971  | 0.133089507 | 0.255310771 |
| cg26878655 | RARA;RAI  | 17 | 0.00079224 | 0.48469424 | 0.544933311 | 0.685877235 |
| cg21746001 | RARG;RAI  | 12 | 0.02003709 | 0.51286878 | 0.510488332 | 0.636300425 |
| cg10592478 | RARG;RAI  | 12 | 0.01366893 | 0.28395047 | 0.209811068 | 0.415619246 |
| cg08977270 | RARRES1;  | 3  | 0.00065949 | 0.44598518 | 0.530100469 | 0.637267172 |
| cg21107044 | RASA3     | 13 | 0.00349176 | 0.31562581 | 0.333888241 | 0.511373339 |
| cg00502575 | RASA3     | 13 | 0.00100445 | 0.34308524 | 0.399696999 | 0.608368589 |
| cg15082473 | RASA3     | 13 | 0.01183547 | 0.30947736 | 0.332164265 | 0.480786974 |
| cg06560223 | RASA3     | 13 | 0.01767742 | 0.39175922 | 0.380398476 | 0.499656644 |
| cg18013730 | RASA3     | 13 | 0.00218799 | 0.33070381 | 0.269707606 | 0.485743585 |
| cg05187651 | RASA3     | 13 | 0.00183809 | 0.29245672 | 0.280922086 | 0.62587442  |
| cg04493793 | RASGRF2   | 5  | 0.00226669 | 0.61766672 | 0.624945489 | 0.73244675  |
| cg15787807 | RASGRP2   | 11 | 0.01447617 | 0.27487736 | 0.295955511 | 0.411895496 |
| cg17735563 | RASGRP3   | 2  | 0.00186737 | 0.57309736 | 0.602543666 | 0.728089526 |
| cg21226754 | RBM22     | 5  | 0.01281774 | 0.59997109 | 0.612288904 | 0.729578774 |
| cg08161081 | RBM39;R   | 20 | 0.01487501 | 0.28672442 | 0.283229681 | 0.407476921 |
| cg27052183 | RBM4      | 11 | 0.02120024 | 0.40809686 | 0.429939669 | 0.542711704 |
| cg22109787 | RBM43     | 2  | 0.04395526 | 0.25211084 | 0.207570032 | 0.357686159 |
| cg11657849 | RBM4B     | 11 | 0.02990975 | 0.36779607 | 0.404833153 | 0.524300014 |
| cg08127080 | RBMS1;R   | 2  | 0.01585745 | 0.40112897 | 0.340556999 | 0.535835449 |
| cg02048613 | RBMS1;R   | 2  | 0.02489039 | 0.31166856 | 0.302587834 | 0.447385549 |
| cg25834692 | RBMS3;R   | 3  | 0.0048909  | 0.65201163 | 0.634405396 | 0.788734184 |
| cg08667600 | RBMS3;R   | 3  | 0.00227742 | 0.37546177 | 0.376854545 | 0.666994086 |
| cg22494026 | RBMS3;R   | 3  | 0.00544367 | 0.2765817  | 0.211641174 | 0.429384499 |
| cg22992279 | RBPJ;RBP  | 4  | 0.00083228 | 0.3084568  | 0.406893165 | 0.559619411 |
| cg17487741 | RCBTB1    | 13 | 0.00754388 | 0.20140484 | 0.16125204  | 0.326755875 |
| cg16550606 | RCBTB1    | 13 | 0.00280849 | 0.30215641 | 0.250377825 | 0.418248164 |
| cg13471374 | RCL1      | 9  | 0.00671027 | 0.57660996 | 0.537439397 | 0.691420214 |
| cg03907174 | RCN3      | 19 | 0.00838913 | 0.33637804 | 0.310928452 | 0.521070184 |
| cg22619810 | RCOR2     | 11 | 0.00643366 | 0.68228033 | 0.697034908 | 0.824119827 |
| cg10823566 | RCSD1     | 1  | 0.00099652 | 0.20627784 | 0.23869318  | 0.418204878 |
| cg09354263 | RECQL5;L  | 17 | 0.00093925 | 0.25573589 | 0.264400033 | 0.470070636 |
| cg08907956 | REEP3     | 10 | 0.00218799 | 0.46184506 | 0.378662384 | 0.592211756 |
| cg11937768 | REEP3     | 10 | 0.00359753 | 0.25132966 | 0.317109353 | 0.528875554 |
| cg14396758 | RELL1;REI | 4  | 0.01690382 | 0.489621   | 0.438373379 | 0.5938969   |
| cg10630085 | RELT;REL  | 11 | 0.01910846 | 0.43220751 | 0.392332515 | 0.572926887 |
| cg27235337 | RER1      | 1  | 0.00230634 | 0.22535402 | 0.17522316  | 0.398212349 |
| cg25722041 | RERE;RER  | 1  | 0.00094083 | 0.36264754 | 0.403155042 | 0.564637912 |
| cg19400316 | RERE;RER  | 1  | 0.01398885 | 0.34253753 | 0.32968836  | 0.531157608 |
| cg13400249 | RERE;RER  | 1  | 0.03349395 | 0.31989841 | 0.318101774 | 0.4546657   |

|            |           |    |            |            |             |             |
|------------|-----------|----|------------|------------|-------------|-------------|
| cg02780029 | RET;RET   | 10 | 0.00160273 | 0.37334243 | 0.39889375  | 0.554464296 |
| cg23527387 | REV1;REV  | 2  | 0.01408624 | 0.17583817 | 0.229688689 | 0.349968216 |
| cg15952465 | RFPL4B    | 6  | 0.00490166 | 0.5191791  | 0.568296824 | 0.692350834 |
| cg24250363 | RFPL4B    | 6  | 0.00233734 | 0.25539319 | 0.242748233 | 0.402826227 |
| cg04212651 | RFPL4B    | 6  | 0.00113577 | 0.45644319 | 0.520953633 | 0.731601166 |
| cg12728543 | RFWD2;R   | 1  | 0.00660543 | 0.59681626 | 0.646737898 | 0.784695811 |
| cg07205154 | RFWD2;R   | 1  | 0.00186404 | 0.52780288 | 0.545504935 | 0.709805214 |
| cg08675117 | RFX2;RFX  | 19 | 0.00666067 | 0.1552694  | 0.154804567 | 0.268652283 |
| cg25741259 | RFX2;RFX  | 19 | 0.00383861 | 0.50700048 | 0.546786611 | 0.653127948 |
| cg24937727 | RGL3;RGL  | 19 | 0.0212437  | 0.13198896 | 0.125471695 | 0.236209567 |
| cg14819229 | RGMA;RC   | 15 | 0.00615082 | 0.59924072 | 0.570361815 | 0.773074614 |
| cg05342906 | RGMA;RC   | 15 | 0.00449302 | 0.61648231 | 0.605524691 | 0.728906    |
| cg03462901 | RGMA;RC   | 15 | 0.00073547 | 0.26304847 | 0.304182994 | 0.505824552 |
| cg26905931 | RGMA;RC   | 15 | 0.00067897 | 0.18460092 | 0.220188913 | 0.451637294 |
| cg24569831 | RGMA;RC   | 15 | 0.00127403 | 0.21989848 | 0.234835138 | 0.384421954 |
| cg03971808 | RGS12;RC  | 4  | 0.00065949 | 0.61158768 | 0.657215441 | 0.785137487 |
| cg13702185 | RGS12;RC  | 4  | 0.01159097 | 0.24263717 | 0.196163294 | 0.360638017 |
| cg10954765 | RGS12;RC  | 4  | 0.00857623 | 0.6338807  | 0.623852158 | 0.761842257 |
| cg16324409 | RGS12;RC  | 4  | 0.00075989 | 0.12237756 | 0.161849226 | 0.280843698 |
| cg08403043 | RGS12;RC  | 4  | 0.00113577 | 0.32139835 | 0.330721788 | 0.523998424 |
| cg21836117 | RGS6      | 14 | 0.00245414 | 0.36976299 | 0.385714222 | 0.500095799 |
| cg24928726 | RGS8;RGS  | 1  | 0.00311025 | 0.18122729 | 0.229917289 | 0.350167918 |
| cg00179196 | RHBDF1    | 16 | 0.00218597 | 0.34887575 | 0.351882847 | 0.465947964 |
| cg07405083 | RHBDF1    | 16 | 0.0009078  | 0.18548561 | 0.210944123 | 0.385962686 |
| cg15120848 | RHBDL2    | 1  | 0.0109037  | 0.58490201 | 0.589849702 | 0.703334295 |
| cg20333869 | RHEB      | 7  | 0.02120024 | 0.38872933 | 0.412044522 | 0.563031614 |
| cg18237616 | RHEB      | 7  | 0.01538119 | 0.25812684 | 0.223886027 | 0.388183495 |
| cg20171453 | RHOH      | 4  | 0.0130683  | 0.40532292 | 0.4157571   | 0.529808119 |
| cg10331518 | RHOT2     | 16 | 0.03129419 | 0.70927426 | 0.702749665 | 0.819024889 |
| cg03054541 | RIC3;RIC3 | 11 | 0.00233544 | 0.43312701 | 0.434811288 | 0.639477544 |
| cg00219210 | RICH2     | 17 | 0.01281867 | 0.33492671 | 0.392100386 | 0.547325295 |
| cg18393905 | RICTOR    | 5  | 0.00131796 | 0.66787305 | 0.587068529 | 0.812364116 |
| cg22107662 | RIMBP3    | 22 | 0.00103447 | 0.26633994 | 0.294267867 | 0.480233727 |
| cg08591048 | RIMBP3C   | 22 | 0.00154265 | 0.26947579 | 0.290912192 | 0.412848543 |
| cg27036054 | RIMS1;RII | 6  | 0.00319723 | 0.69944583 | 0.672063078 | 0.84328404  |
| cg01288337 | RIN3      | 14 | 0.00073118 | 0.1725844  | 0.260446767 | 0.382068908 |
| cg15789055 | RING1     | 6  | 0.00855749 | 0.56371231 | 0.567461275 | 0.667969791 |
| cg13796295 | RIPK3     | 14 | 0.00796332 | 0.44342975 | 0.4453608   | 0.563609189 |
| cg20989926 | RLBP1     | 15 | 0.00365562 | 0.35008704 | 0.400698533 | 0.519303461 |
| cg12903024 | RLBP1     | 15 | 0.00755255 | 0.27558901 | 0.270041247 | 0.433251348 |
| cg10173075 | RLBP1;RL  | 15 | 0.00188718 | 0.34518961 | 0.387029467 | 0.531380631 |
| cg00452882 | RLTPR     | 16 | 0.01366893 | 0.40099946 | 0.37677707  | 0.531920327 |
| cg10665490 | RMND5A    | 2  | 0.00591291 | 0.35354402 | 0.369613605 | 0.520468015 |
| cg06033764 | RNF138;F  | 18 | 0.00279455 | 0.18386639 | 0.180799755 | 0.28949422  |
| cg08058160 | RNF144A   | 2  | 0.01980822 | 0.39044739 | 0.433531572 | 0.578596985 |
| cg17918184 | RNF144A   | 2  | 0.04084205 | 0.58498899 | 0.618460969 | 0.727214815 |

|            |          |    |            |             |             |             |
|------------|----------|----|------------|-------------|-------------|-------------|
| cg17589449 | RNF185;F | 22 | 0.01678972 | 0.23022792  | 0.20740006  | 0.330798713 |
| cg22163472 | RNF19B;F | 1  | 0.00147518 | 0.56363733  | 0.6153886   | 0.741028922 |
| cg15106452 | RNF208   | 9  | 0.00758031 | 0.52672884  | 0.53083726  | 0.692664106 |
| cg11606607 | RNF213;F | 17 | 0.01970757 | 0.63933537  | 0.62834071  | 0.788074666 |
| cg09860921 | RNF220   | 1  | 0.00331728 | 0.50017576  | 0.4899494   | 0.616411655 |
| cg20748242 | RNF44    | 5  | 0.00209505 | 0.15084352  | 0.140525744 | 0.31469909  |
| cg19311055 | RNF5P1   | 8  | 0.00194981 | 0.36316343  | 0.436375667 | 0.631617672 |
| cg03163812 | RNF5P1   | 8  | 0.00084118 | 0.20658015  | 0.279800695 | 0.550298748 |
| cg19488149 | RNGTT    | 6  | 0.01073914 | 0.61006539  | 0.64268852  | 0.753900772 |
| cg26204913 | RNH1;RN  | 11 | 0.0016549  | 0.53163443  | 0.516895822 | 0.688218491 |
| cg24933651 | ROBO2;R  | 3  | 0.00177694 | 0.69981188  | 0.766210068 | 0.868066302 |
| cg14216252 | ROR1;RO  | 1  | 0.00092643 | 0.28309303  | 0.291768449 | 0.501609708 |
| cg19267457 | ROR1;RO  | 1  | 0.00154265 | 0.1641922   | 0.171837428 | 0.319822197 |
| cg20629316 | ROR1;RO  | 1  | 0.01358672 | 0.75028686  | 0.750380103 | 0.855961554 |
| cg14044388 | ROR2     | 9  | 0.00283173 | 0.34379837  | 0.385545473 | 0.499295655 |
| cg00937392 | ROR2     | 9  | 0.00459107 | 0.46199558  | 0.456805786 | 0.589237228 |
| cg08106764 | RORA     | 15 | 0.01235814 | 0.34221403  | 0.388910394 | 0.498653481 |
| cg22387253 | RORA     | 15 | 0.00262173 | 0.47981513  | 0.499261343 | 0.610060638 |
| cg08099431 | RORA     | 15 | 0.03981181 | 0.37840466  | 0.292156503 | 0.533062205 |
| cg03952578 | RORA     | 15 | 0.00142756 | 0.61944752  | 0.646287067 | 0.764072625 |
| cg09026994 | RPH3AL   | 17 | 0.00132036 | 0.17249262  | 0.184179498 | 0.315814229 |
| cg12742645 | RPH3AL   | 17 | 0.02418358 | 0.46979684  | 0.42505848  | 0.611241961 |
| cg22251117 | RPH3AL   | 17 | 0.02078916 | 0.42358955  | 0.443380117 | 0.579158372 |
| cg11407989 | RPL13AP: | 7  | 0.0081506  | 0.35158547  | 0.385512377 | 0.505429847 |
| cg05181927 | RPS24;RP | 10 | 0.02381973 | 0.33758576  | 0.324639383 | 0.50208452  |
| cg16361947 | RPSA;RPS | 3  | 0.00172495 | 0.19058202  | 0.195950945 | 0.43869287  |
| cg20462129 | RPTOR;Rf | 17 | 0.00211914 | 0.64600203  | 0.66022928  | 0.77218435  |
| cg15815120 | RPTOR;Rf | 17 | 0.00375204 | 0.60543035  | 0.621237475 | 0.749881096 |
| cg12434898 | RPTOR;Rf | 17 | 0.00327239 | 0.26693736  | 0.291818444 | 0.444558658 |
| cg01911440 | RPTOR;Rf | 17 | 0.02252087 | 0.3685837   | 0.364493107 | 0.506806678 |
| cg14647957 | RPTOR;Rf | 17 | 0.00097592 | 0.65356565  | 0.700680046 | 0.802720596 |
| cg01886663 | RPTOR;Rf | 17 | 0.00070678 | 0.33852372  | 0.394128751 | 0.535514239 |
| cg24327522 | RPTOR;Rf | 17 | 0.03856073 | 0.38928452  | 0.367861154 | 0.496485379 |
| cg06053702 | RPTOR;Rf | 17 | 0.00103895 | 0.57351706  | 0.576202774 | 0.682691554 |
| cg02864619 | RPTOR;Rf | 17 | 0.00136593 | 0.46050331  | 0.422109897 | 0.653587307 |
| cg09361653 | RPTOR;Rf | 17 | 0.00249952 | 0.444414582 | 0.449470462 | 0.561758471 |
| cg12632411 | RRBP1;Rf | 20 | 0.00954417 | 0.22462895  | 0.177830766 | 0.364083374 |
| cg26161708 | RRBP1;Rf | 20 | 0.00969263 | 0.1567002   | 0.119693174 | 0.267110255 |
| cg01358966 | RRN3P2   | 16 | 0.00215126 | 0.41171103  | 0.465254907 | 0.604028851 |
| cg24517066 | RSAD1    | 17 | 0.00629918 | 0.12269856  | 0.11777421  | 0.25049507  |
| cg07112562 | RSU1;RSL | 10 | 0.02199481 | 0.58050308  | 0.56190824  | 0.683697829 |
| cg11994630 | RTKN;RTK | 2  | 0.00320053 | 0.36047069  | 0.357134839 | 0.467633547 |
| cg00326131 | RTKN;RTK | 2  | 0.00702941 | 0.17555475  | 0.150618308 | 0.290104666 |
| cg18280126 | RTN4RL2  | 11 | 0.01783758 | 0.44601204  | 0.437939834 | 0.561042028 |
| cg02767634 | RUFY1;RL | 5  | 0.00741048 | 0.30715485  | 0.317988984 | 0.510086026 |
| cg04194479 | RUNDC2C  | 16 | 0.00119385 | 0.30683009  | 0.348672626 | 0.586552248 |



|            |          |    |            |            |             |             |
|------------|----------|----|------------|------------|-------------|-------------|
| cg08254842 | RUNDC2C  | 16 | 0.01744696 | 0.22747891 | 0.223845471 | 0.355458751 |
| cg04110902 | RUNX2;R  | 6  | 0.03680055 | 0.54073498 | 0.544712696 | 0.659290249 |
| cg05162523 | RUNX3;R  | 1  | 0.00376781 | 0.21935408 | 0.241784343 | 0.35587027  |
| cg04875697 | RXRA     | 9  | 0.00497255 | 0.39771309 | 0.418879046 | 0.598851214 |
| cg02319187 | RXRA     | 9  | 0.00099274 | 0.41409802 | 0.473190101 | 0.6972652   |
| cg14545975 | RXRA     | 9  | 0.00065949 | 0.31906315 | 0.446339868 | 0.618868959 |
| cg14344989 | RXRA     | 9  | 0.00220808 | 0.17218197 | 0.173166747 | 0.370198822 |
| cg13425135 | RXRA     | 9  | 0.00089205 | 0.37764328 | 0.433428961 | 0.557947684 |
| cg04966574 | RXRB     | 6  | 0.00092912 | 0.31668152 | 0.34178986  | 0.463294803 |
| cg14263924 | RXRB     | 6  | 0.00556197 | 0.58268209 | 0.581330373 | 0.702362828 |
| cg06370855 | RXRB     | 6  | 0.00316916 | 0.22397666 | 0.218148469 | 0.358433763 |
| cg19033438 | RXRB     | 6  | 0.01766834 | 0.53709649 | 0.546035276 | 0.669440875 |
| cg07516307 | RXRB     | 6  | 0.00146869 | 0.59133067 | 0.618617643 | 0.729520672 |
| cg11284973 | RXRB     | 6  | 0.00255774 | 0.24439438 | 0.246044202 | 0.428695587 |
| cg08092515 | RYK;RYK  | 3  | 0.0070502  | 0.5505005  | 0.58361277  | 0.713993595 |
| cg00299070 | RYR2     | 1  | 0.00089487 | 0.153893   | 0.189791782 | 0.335135716 |
| cg16888559 | RYR3     | 15 | 0.04742879 | 0.47045579 | 0.462067559 | 0.57528372  |
| cg17080740 | S100A1;S | 1  | 0.00107001 | 0.19821817 | 0.233707056 | 0.370001896 |
| cg14467840 | S100A13; | 1  | 0.0009078  | 0.1312236  | 0.158761362 | 0.333719087 |
| cg10963218 | S100A13; | 1  | 0.00162163 | 0.18545618 | 0.248721913 | 0.430618859 |
| cg15559456 | S100A13; | 1  | 0.00081789 | 0.13159529 | 0.153088318 | 0.313595511 |
| cg20847746 | S100A13; | 1  | 0.00910491 | 0.19215074 | 0.198247422 | 0.360397589 |
| cg10224088 | S100A13; | 1  | 0.01842703 | 0.21264263 | 0.205372454 | 0.353643107 |
| cg11064537 | S100B    | 21 | 0.02586844 | 0.16741603 | 0.140901202 | 0.299804535 |
| cg04353438 | SAFB2    | 19 | 0.00232154 | 0.21186893 | 0.234679215 | 0.395893289 |
| cg04312620 | SALL4    | 20 | 0.00597821 | 0.32052689 | 0.329274845 | 0.463854686 |
| cg14160518 | SALL4;SA | 20 | 0.01787304 | 0.35051143 | 0.312051425 | 0.467360003 |
| cg13856810 | SAMD11   | 1  | 0.01195883 | 0.37880109 | 0.343667544 | 0.490526477 |
| cg20074307 | SAMD4A;  | 14 | 0.04407901 | 0.31858554 | 0.315888787 | 0.451746065 |
| cg10888242 | SAMD4A;  | 14 | 0.01102429 | 0.27808089 | 0.291639928 | 0.444909883 |
| cg23901920 | SAMD4A;  | 14 | 0.01010631 | 0.1842696  | 0.133010672 | 0.295576259 |
| cg26300500 | SBF1     | 22 | 0.00434915 | 0.49573477 | 0.470821143 | 0.638374224 |
| cg18019717 | SBF1     | 22 | 0.00240535 | 0.4928004  | 0.514853707 | 0.637240433 |
| cg04563863 | SBNO2    | 19 | 0.01496968 | 0.42127137 | 0.403303193 | 0.543489197 |
| cg18693051 | SBNO2    | 19 | 0.00081789 | 0.15448578 | 0.169060094 | 0.350060725 |
| cg26019472 | SBNO2    | 19 | 0.01530568 | 0.199407   | 0.176426318 | 0.313432441 |
| cg21080562 | SBNO2;S  | 19 | 0.00690449 | 0.26133519 | 0.203308834 | 0.377164151 |
| cg22152492 | SCAND3   | 6  | 0.01311724 | 0.42172971 | 0.408266567 | 0.528001894 |
| cg20781847 | SCARA3;S | 8  | 0.00711398 | 0.17279858 | 0.153215044 | 0.321370829 |
| cg22775642 | SCARB1;S | 12 | 0.00290605 | 0.2160546  | 0.210400308 | 0.372542906 |
| cg13075279 | SCARB1;S | 12 | 0.00620216 | 0.45011853 | 0.466682518 | 0.659490954 |
| cg14846380 | SCARB1;S | 12 | 0.04667899 | 0.49010178 | 0.543011926 | 0.657054345 |
| cg09268718 | SCARF1;S | 17 | 0.00668249 | 0.36994116 | 0.298815752 | 0.557474948 |
| cg22091609 | SCARF2;S | 22 | 0.00066232 | 0.16210454 | 0.248005156 | 0.349901684 |
| cg18518722 | SCARF2;S | 22 | 0.00204405 | 0.60103325 | 0.587263671 | 0.705605346 |
| cg24708308 | SCARNA1  | 12 | 0.00380968 | 0.31947005 | 0.339489162 | 0.521970924 |

|            |           |    |            |            |             |             |
|------------|-----------|----|------------|------------|-------------|-------------|
| cg02237755 | SCD       | 10 | 0.02817047 | 0.24176254 | 0.247040379 | 0.397669712 |
| cg16744911 | SCD       | 10 | 0.00168732 | 0.17678491 | 0.177511951 | 0.359606147 |
| cg04881673 | SCD5;SCD  | 4  | 0.00186404 | 0.49597794 | 0.505226059 | 0.677624562 |
| cg23999526 | SCFD2     | 4  | 0.00317338 | 0.14633932 | 0.140206425 | 0.252250838 |
| cg16061228 | SCN4B;SC  | 11 | 0.00450197 | 0.24010992 | 0.229607113 | 0.342601219 |
| cg10294363 | SCNN1A;S  | 12 | 0.01212237 | 0.38752877 | 0.371011203 | 0.556306933 |
| cg12510724 | SCNN1A;S  | 12 | 0.00245414 | 0.19049657 | 0.204926687 | 0.384130026 |
| cg23245485 | SCNN1A;S  | 12 | 0.00077468 | 0.35065015 | 0.417334772 | 0.530973066 |
| cg01324261 | SCRG1;SC  | 4  | 0.01561358 | 0.17488154 | 0.130058928 | 0.276054318 |
| cg04858110 | SCRN1;SC  | 7  | 0.00065949 | 0.50018804 | 0.585358829 | 0.695238629 |
| cg24733126 | SCUBE2;S  | 11 | 0.04884648 | 0.43086431 | 0.491341649 | 0.597440243 |
| cg26842303 | SDC2      | 8  | 0.00747631 | 0.40520647 | 0.42961865  | 0.629384224 |
| cg14830748 | SDC2      | 8  | 0.00447146 | 0.758568   | 0.769635897 | 0.871833437 |
| cg16962683 | SDC2      | 8  | 0.00854289 | 0.27498556 | 0.197079521 | 0.459332704 |
| cg12190613 | SDC2      | 8  | 0.00456818 | 0.29749128 | 0.324682394 | 0.495488095 |
| cg14836522 | SDC3      | 1  | 0.00104452 | 0.13912818 | 0.19703763  | 0.333848401 |
| cg08443357 | SDCBP2    | 20 | 0.03110358 | 0.27463874 | 0.279887705 | 0.424169092 |
| cg05007126 | SDCBP2    | 20 | 0.00244246 | 0.28801059 | 0.273411636 | 0.388758696 |
| cg16786297 | SDCBP2;S  | 20 | 0.00630552 | 0.51543095 | 0.551871674 | 0.666435157 |
| cg08262429 | SDCCAG8   | 1  | 0.00725151 | 0.25108537 | 0.209542241 | 0.437944422 |
| cg18022346 | SDK1      | 7  | 0.0156698  | 0.56465014 | 0.542134789 | 0.676388056 |
| cg04609841 | SDK1      | 7  | 0.00359376 | 0.21019544 | 0.276182156 | 0.395810051 |
| cg02491557 | SDK1      | 7  | 0.00752854 | 0.19782667 | 0.238766718 | 0.361428473 |
| cg00711291 | SDK2      | 17 | 0.00085355 | 0.14454195 | 0.181175801 | 0.42721323  |
| cg14295306 | SDK2      | 17 | 0.00294138 | 0.47815275 | 0.491318995 | 0.658521477 |
| cg24527434 | SDK2      | 17 | 0.00090315 | 0.26450253 | 0.316426673 | 0.454340696 |
| cg13699963 | SDK2      | 17 | 0.00100115 | 0.16083415 | 0.196151245 | 0.347797559 |
| cg26503079 | SDR9C7    | 12 | 0.00375204 | 0.57780409 | 0.590555624 | 0.714417456 |
| cg20337028 | SEC14L1;S | 17 | 0.00405622 | 0.40927408 | 0.407398529 | 0.577010161 |
| cg15046304 | SEC14L1;S | 17 | 0.0017637  | 0.20793461 | 0.225944256 | 0.440174196 |
| cg21243064 | SEC16A    | 9  | 0.028548   | 0.48057743 | 0.542675919 | 0.701800466 |
| cg25135333 | SEC16B    | 1  | 0.0108413  | 0.46832572 | 0.451728596 | 0.617888842 |
| cg02289040 | SEC16B    | 1  | 0.04006803 | 0.53679201 | 0.516746535 | 0.640015242 |
| cg07468956 | SECTM1    | 17 | 0.00556197 | 0.60984938 | 0.612853429 | 0.724472936 |
| cg12862820 | SEMA3A    | 7  | 0.00462124 | 0.5207635  | 0.413792354 | 0.687003143 |
| cg13381679 | SEMA4B;S  | 15 | 0.03941479 | 0.46516142 | 0.478145128 | 0.621305694 |
| cg17819119 | SEMA4C    | 2  | 0.00753573 | 0.31486161 | 0.298711617 | 0.460967545 |
| cg21578050 | SEMA6A    | 5  | 0.00126466 | 0.67546077 | 0.723112998 | 0.851228694 |
| cg27157619 | SEMA7A;S  | 15 | 0.00119471 | 0.23129714 | 0.270247036 | 0.487530401 |
| cg14397309 | SENP1     | 12 | 0.01857513 | 0.18074107 | 0.156358904 | 0.282124756 |
| cg16976499 | SENP6;SE  | 6  | 0.01613643 | 0.32154393 | 0.337484037 | 0.476515251 |
| cg00871371 | SEPT9;SEI | 17 | 0.00290119 | 0.40373196 | 0.461329023 | 0.577590423 |
| cg07827420 | SEPT9;SEI | 17 | 0.00068904 | 0.2952961  | 0.343524301 | 0.492541712 |
| cg01320579 | SEPT9;SEI | 17 | 0.0035878  | 0.25621662 | 0.245266479 | 0.418644929 |
| cg05865280 | SEPT9;SEI | 17 | 0.03585699 | 0.11774174 | 0.143193374 | 0.252874965 |
| cg26079706 | SEPT9;SEI | 17 | 0.00193482 | 0.46309858 | 0.487129809 | 0.654728653 |

|            |           |    |            |            |             |             |
|------------|-----------|----|------------|------------|-------------|-------------|
| cg17112975 | SEPT9;SEI | 17 | 0.00065949 | 0.15684373 | 0.207209211 | 0.336502671 |
| cg07324245 | SEPT9;SEI | 17 | 0.00169055 | 0.1906593  | 0.186085464 | 0.306556145 |
| cg17922695 | SEPT9;SEI | 17 | 0.00233298 | 0.43966949 | 0.429204764 | 0.591810467 |
| cg14843920 | SEPT9;SEI | 17 | 0.00192049 | 0.61859413 | 0.625965334 | 0.757914918 |
| cg02397064 | SEPT9;SEI | 17 | 0.00129597 | 0.62501441 | 0.629593288 | 0.746873059 |
| cg12194864 | SEPT9;SEI | 17 | 0.00118326 | 0.63282838 | 0.66406662  | 0.806957844 |
| cg17053854 | SEPT9;SEI | 17 | 0.00092022 | 0.69163292 | 0.704705678 | 0.815818613 |
| cg06791979 | SEPT9;SEI | 17 | 0.00944446 | 0.40345515 | 0.387482678 | 0.511599004 |
| cg01899544 | SEPT9;SEI | 17 | 0.00336646 | 0.54066224 | 0.533180264 | 0.645331503 |
| cg21985691 | SERGEF    | 11 | 0.00925638 | 0.23284411 | 0.192954911 | 0.34177187  |
| cg12673019 | SERGEF    | 11 | 0.0129251  | 0.29827797 | 0.355955391 | 0.5076088   |
| cg06677021 | SERINC5   | 5  | 0.00349176 | 0.64221255 | 0.599679161 | 0.762231803 |
| cg24099605 | SERPINA4  | 14 | 0.00574743 | 0.38975631 | 0.370126477 | 0.522311532 |
| cg23524537 | SERPINA4  | 14 | 0.00176484 | 0.25453002 | 0.254358923 | 0.389330123 |
| cg07348591 | SERPINE2  | 2  | 0.01665976 | 0.64863574 | 0.64075274  | 0.796491279 |
| cg01417313 | SERTAD4   | 1  | 0.00133251 | 0.18666496 | 0.184962811 | 0.441179638 |
| cg17117243 | SESN1     | 6  | 0.00065949 | 0.31319368 | 0.489367081 | 0.616922883 |
| cg24180006 | SETD3;SE  | 14 | 0.00359124 | 0.21783706 | 0.214386877 | 0.452792943 |
| cg22633932 | SETD7     | 4  | 0.00177922 | 0.48720125 | 0.489434452 | 0.683857036 |
| cg22885062 | SF1;SF1;S | 11 | 0.01780469 | 0.56291858 | 0.563775607 | 0.709348542 |
| cg03986574 | SF1;SF1;S | 11 | 0.00103895 | 0.57426532 | 0.58267636  | 0.746049552 |
| cg03421300 | SFN       | 1  | 0.01561381 | 0.5977419  | 0.592561455 | 0.717270516 |
| cg02154585 | SFRP1     | 8  | 0.00140256 | 0.44180901 | 0.485632026 | 0.63508139  |
| cg21977218 | SFRS12;SI | 5  | 0.01116167 | 0.48014437 | 0.495842912 | 0.608587382 |
| cg15817163 | SFRS8     | 12 | 0.03354729 | 0.40599755 | 0.409490298 | 0.560560003 |
| cg06555661 | SFRS8     | 12 | 0.04790527 | 0.37038114 | 0.360124724 | 0.500652199 |
| cg04582295 | SGCA;SGC  | 17 | 0.00314038 | 0.50420157 | 0.50956231  | 0.612197994 |
| cg16627285 | SGCA;SGC  | 17 | 0.00626125 | 0.47220662 | 0.535228572 | 0.674553557 |
| cg15756653 | SGCA;SGC  | 17 | 0.00592671 | 0.49696128 | 0.526157433 | 0.629401451 |
| cg22086834 | SGCE;SGC  | 7  | 0.04741646 | 0.3496088  | 0.385104042 | 0.505301914 |
| cg03920161 | SGK2;SGK  | 20 | 0.00584729 | 0.39692269 | 0.386381243 | 0.507291909 |
| cg13799263 | SGMS1     | 10 | 0.0191912  | 0.29435561 | 0.259769422 | 0.416173281 |
| cg09806432 | SGSM2;Si  | 17 | 0.00319723 | 0.46290809 | 0.432331545 | 0.598442469 |
| cg23375247 | SGTA      | 19 | 0.00301632 | 0.3085539  | 0.308919624 | 0.533242757 |
| cg10362613 | SH2D4A    | 8  | 0.00129639 | 0.25091385 | 0.282790336 | 0.453046095 |
| cg18403548 | SH3BP2;S  | 4  | 0.0026101  | 0.21117373 | 0.210274767 | 0.364312884 |
| cg12559925 | SH3BP4    | 2  | 0.00174783 | 0.22767035 | 0.27097247  | 0.458200821 |
| cg11677744 | SH3BP4    | 2  | 0.00242331 | 0.15360799 | 0.160485768 | 0.292687594 |
| cg09042791 | SH3BP4    | 2  | 0.00157573 | 0.25780386 | 0.304656019 | 0.554066751 |
| cg01854776 | SH3BP4    | 2  | 0.00244246 | 0.19478257 | 0.213840627 | 0.374831413 |
| cg01696784 | SH3BP4    | 2  | 0.00369078 | 0.16771063 | 0.178425028 | 0.292403611 |
| cg01881549 | SH3BP4    | 2  | 0.01155671 | 0.16827076 | 0.162389511 | 0.278461874 |
| cg21283680 | SH3BP5    | 3  | 0.00081925 | 0.25439604 | 0.377937351 | 0.482470756 |
| cg24203758 | SH3D20    | 17 | 0.01134767 | 0.33361616 | 0.307938963 | 0.440750269 |
| cg20463302 | SH3D20    | 17 | 0.00388546 | 0.33029281 | 0.30735242  | 0.439580203 |
| cg02030270 | SH3GL3;S  | 15 | 0.00187198 | 0.37817503 | 0.413157284 | 0.618453372 |

|            |           |    |            |            |             |             |
|------------|-----------|----|------------|------------|-------------|-------------|
| cg04388244 | SH3PXD2.  | 10 | 0.00838913 | 0.32537472 | 0.314904494 | 0.425384218 |
| cg23985995 | SH3PXD2.  | 10 | 0.04052226 | 0.25747839 | 0.228237574 | 0.363429582 |
| cg25693317 | SH3PXD2   | 5  | 0.00065949 | 0.14608246 | 0.356115597 | 0.540919028 |
| cg15678744 | SH3PXD2   | 5  | 0.00195549 | 0.12005908 | 0.126373081 | 0.236382918 |
| cg03868944 | SH3PXD2   | 5  | 0.00271346 | 0.21386739 | 0.214296976 | 0.429867751 |
| cg02772159 | SH3PXD2   | 5  | 0.00154265 | 0.35116794 | 0.372911327 | 0.53615797  |
| cg13022534 | SH3PXD2   | 5  | 0.01887509 | 0.20951396 | 0.169955536 | 0.362041314 |
| cg01642901 | SH3RF1    | 4  | 0.01297808 | 0.50935987 | 0.595453474 | 0.696148848 |
| cg14966782 | SH3RF3    | 2  | 0.0084821  | 0.2129175  | 0.211130684 | 0.341573262 |
| cg19024599 | SH3RF3    | 2  | 0.00163361 | 0.33967997 | 0.388476633 | 0.623132747 |
| cg10842314 | SH3TC1    | 4  | 0.00294511 | 0.47981634 | 0.511655013 | 0.614227909 |
| cg20277282 | SH3TC1    | 4  | 0.01783758 | 0.22950646 | 0.234791078 | 0.350891063 |
| cg07248017 | SH3TC1    | 4  | 0.00081599 | 0.3717793  | 0.430958894 | 0.561273475 |
| cg14818279 | SH3TC2    | 5  | 0.00192049 | 0.34457042 | 0.324678264 | 0.60464165  |
| cg26474043 | SH3TC2    | 5  | 0.00168532 | 0.21361536 | 0.237610395 | 0.356148032 |
| cg09548638 | SH3TC2    | 5  | 0.00194312 | 0.21482832 | 0.235548729 | 0.412969026 |
| cg15418783 | SHANK2    | 11 | 0.00499799 | 0.34630666 | 0.352825859 | 0.501813993 |
| cg06868991 | SHANK2    | 11 | 0.00948686 | 0.45212852 | 0.463740568 | 0.593297333 |
| cg17959824 | SHANK2;S  | 11 | 0.00144365 | 0.49746707 | 0.454214471 | 0.645019952 |
| cg12159995 | SHANK2;S  | 11 | 0.00620309 | 0.49168531 | 0.496663168 | 0.601419453 |
| cg04112058 | SHCBP1    | 16 | 0.01365382 | 0.62917803 | 0.553038148 | 0.73303494  |
| cg00954833 | SHFM1     | 7  | 0.01789337 | 0.28627285 | 0.286712945 | 0.462229343 |
| cg12639933 | SHMT2;SI  | 12 | 0.0074197  | 0.22695767 | 0.199615842 | 0.341459059 |
| cg25004176 | SHPK;TRP  | 17 | 0.00317348 | 0.76453158 | 0.769869813 | 0.892382287 |
| cg17376853 | SIGIRR;SI | 11 | 0.0049312  | 0.35914376 | 0.381878256 | 0.53424015  |
| cg10824582 | SIK3      | 11 | 0.02823023 | 0.15873446 | 0.149290865 | 0.261802658 |
| cg01324702 | SIL1;SIL1 | 5  | 0.00161871 | 0.13260178 | 0.135283007 | 0.27143412  |
| cg05452066 | SIL1;SIL1 | 5  | 0.02775429 | 0.40114974 | 0.399312254 | 0.54063349  |
| cg25462751 | SIL1;SIL1 | 5  | 0.01358672 | 0.26210198 | 0.232016954 | 0.420736942 |
| cg07536018 | SIL1;SIL1 | 5  | 0.00520163 | 0.14914304 | 0.121477839 | 0.306470606 |
| cg10538440 | SIM2;SIM  | 21 | 0.04163515 | 0.32355105 | 0.298451975 | 0.45845057  |
| cg24147428 | SIPA1;SIP | 11 | 0.00152023 | 0.22110337 | 0.255791464 | 0.357747483 |
| cg21033440 | SIPA1;SIP | 11 | 0.00570412 | 0.25065821 | 0.221778699 | 0.374390973 |
| cg18975839 | SIPA1L2   | 1  | 0.00521564 | 0.60729005 | 0.606534022 | 0.726297431 |
| cg04400145 | SIRPA     | 20 | 0.00648443 | 0.2582561  | 0.251818579 | 0.384773453 |
| cg00472837 | SIRPD     | 20 | 0.00783744 | 0.61954421 | 0.602931833 | 0.72561509  |
| cg24338091 | SIX5      | 19 | 0.01746225 | 0.16528906 | 0.153643579 | 0.273610559 |
| cg27181142 | SIX5      | 19 | 0.00597387 | 0.29182825 | 0.249106757 | 0.405783312 |
| cg25686087 | SIX5      | 19 | 0.00347947 | 0.24393874 | 0.228694549 | 0.348775196 |
| cg02050917 | SKI       | 1  | 0.00114883 | 0.23781705 | 0.268541749 | 0.380347486 |
| cg24377150 | SKI       | 1  | 0.00247734 | 0.40779363 | 0.434998341 | 0.613922919 |
| cg02360367 | SKI       | 1  | 0.00103697 | 0.31093125 | 0.377351151 | 0.604335805 |
| cg12473697 | SKI       | 1  | 0.00524148 | 0.23887729 | 0.259074854 | 0.419220669 |
| cg05948763 | SKI       | 1  | 0.01783758 | 0.41624507 | 0.411555214 | 0.542647804 |
| cg16575461 | SKI       | 1  | 0.00129968 | 0.61813076 | 0.659715702 | 0.759852898 |
| cg04619852 | SKI       | 1  | 0.00176085 | 0.26668673 | 0.283639674 | 0.401421218 |

|            |          |    |            |            |             |             |
|------------|----------|----|------------|------------|-------------|-------------|
| cg21405929 | SKI      | 1  | 0.00186404 | 0.25981674 | 0.277885213 | 0.400541343 |
| cg17854510 | SKI      | 1  | 0.0097835  | 0.29725173 | 0.306738775 | 0.442436833 |
| cg14178705 | SKIV2L   | 6  | 0.00539451 | 0.63191314 | 0.589251711 | 0.742981048 |
| cg13015485 | SKIV2L   | 6  | 0.00917562 | 0.31250417 | 0.325049085 | 0.472220792 |
| cg01817009 | SLC12A4; | 16 | 0.00236877 | 0.22762312 | 0.193355635 | 0.420445295 |
| cg10544611 | SLC12A4; | 16 | 0.00186737 | 0.53045295 | 0.508222432 | 0.687346394 |
| cg06378129 | SLC12A4; | 16 | 0.00124625 | 0.3554822  | 0.349698378 | 0.516489837 |
| cg02564259 | SLC12A4; | 16 | 0.00743161 | 0.27567842 | 0.238240657 | 0.422517921 |
| cg20003638 | SLC12A5; | 20 | 0.01393327 | 0.26814637 | 0.2581032   | 0.37571151  |
| cg26803305 | SLC14A1; | 18 | 0.00354864 | 0.16386735 | 0.168742383 | 0.335433563 |
| cg19363889 | SLC14A1; | 18 | 0.0048909  | 0.40128748 | 0.397503586 | 0.590799835 |
| cg18130079 | SLC16A1; | 1  | 0.00471011 | 0.32927353 | 0.349856057 | 0.59985737  |
| cg20822693 | SLC16A14 | 2  | 0.00931986 | 0.16420227 | 0.14650556  | 0.274108156 |
| cg18247852 | SLC16A3; | 17 | 0.0017385  | 0.2905478  | 0.30132899  | 0.467998761 |
| cg03227481 | SLC16A9  | 10 | 0.00555806 | 0.64027148 | 0.645254815 | 0.766418032 |
| cg22231400 | SLC17A7  | 19 | 0.00165724 | 0.1288246  | 0.188430651 | 0.326060982 |
| cg19074198 | SLC19A1  | 21 | 0.0103127  | 0.33862427 | 0.332408865 | 0.479801993 |
| cg13971030 | SLC1A2   | 11 | 0.00908203 | 0.16582311 | 0.191186596 | 0.31385622  |
| cg13434757 | SLC22A1; | 6  | 0.04089782 | 0.32457573 | 0.298643712 | 0.512865763 |
| cg12882392 | SLC22A11 | 11 | 0.00280849 | 0.47637472 | 0.417631925 | 0.607164363 |
| cg01822289 | SLC22A11 | 11 | 0.00137441 | 0.45938554 | 0.412293646 | 0.590337122 |
| cg01748193 | SLC22A11 | 11 | 0.00220808 | 0.45802659 | 0.466958478 | 0.578102813 |
| cg06048910 | SLC22A18 | 11 | 0.00653182 | 0.25103506 | 0.231602679 | 0.38427178  |
| cg24041239 | SLC22A18 | 11 | 0.03954748 | 0.63935172 | 0.639090201 | 0.768435246 |
| cg07291601 | SLC22A18 | 11 | 0.00186737 | 0.42866588 | 0.422289014 | 0.686479737 |
| cg25548316 | SLC22A18 | 11 | 0.00247655 | 0.2638734  | 0.260751987 | 0.458190196 |
| cg10943932 | SLC22A18 | 11 | 0.01109894 | 0.28260986 | 0.252480195 | 0.427425137 |
| cg02081198 | SLC22A18 | 11 | 0.00429569 | 0.56152834 | 0.556935449 | 0.693262416 |
| cg24102242 | SLC22A23 | 6  | 0.00357777 | 0.4622761  | 0.485628101 | 0.589740955 |
| cg09226986 | SLC22A3  | 6  | 0.01206679 | 0.23370555 | 0.190609826 | 0.348846574 |
| cg26929925 | SLC23A1; | 5  | 0.02047468 | 0.40690463 | 0.353384788 | 0.515978258 |
| cg12205435 | SLC23A1; | 5  | 0.01783758 | 0.35502987 | 0.32164502  | 0.47975043  |
| cg11953252 | SLC24A3; | 20 | 0.01622063 | 0.36223798 | 0.406230956 | 0.599491005 |
| cg22944803 | SLC24A3; | 20 | 0.01263862 | 0.20112367 | 0.163267145 | 0.362512498 |
| cg05200313 | SLC24A4; | 14 | 0.00073118 | 0.11299715 | 0.157014581 | 0.264421178 |
| cg11609462 | SLC25A10 | 17 | 0.01004931 | 0.47084003 | 0.480810638 | 0.629224845 |
| cg04337734 | SLC25A12 | 2  | 0.00454314 | 0.3566944  | 0.346028519 | 0.543124122 |
| cg14213297 | SLC25A25 | 9  | 0.01131777 | 0.36591795 | 0.373895885 | 0.480015707 |
| cg16713727 | SLC25A34 | 1  | 0.00537713 | 0.33401356 | 0.30360576  | 0.466334303 |
| cg10881110 | SLC25A34 | 1  | 0.00405051 | 0.2696193  | 0.264150009 | 0.383849903 |
| cg09153458 | SLC26A1; | 4  | 0.00544367 | 0.70757999 | 0.686653652 | 0.810785845 |
| cg25561754 | SLC26A11 | 17 | 0.00194312 | 0.31060075 | 0.338472525 | 0.527592792 |
| cg10930502 | SLC26A11 | 17 | 0.00329066 | 0.17952237 | 0.165808074 | 0.286081143 |
| cg09479512 | SLC27A1  | 19 | 0.00141699 | 0.16167365 | 0.17534925  | 0.337442076 |
| cg07826642 | SLC29A1; | 6  | 0.00917562 | 0.20636356 | 0.200543692 | 0.372502597 |
| cg02354828 | SLC29A3  | 10 | 0.00554086 | 0.53888927 | 0.558689527 | 0.673752626 |

|            |          |    |            |            |             |             |
|------------|----------|----|------------|------------|-------------|-------------|
| cg06702884 | SLC29A3  | 10 | 0.00124758 | 0.29320907 | 0.344893147 | 0.473393966 |
| cg05345039 | SLC2A1   | 1  | 0.00088355 | 0.31205899 | 0.377659091 | 0.611085912 |
| cg05942022 | SLC2A1   | 1  | 0.01786937 | 0.21125577 | 0.195476425 | 0.324770345 |
| cg20294984 | SLC2A1   | 1  | 0.00073732 | 0.53368693 | 0.639397866 | 0.781460114 |
| cg11381149 | SLC2A12  | 6  | 0.01481543 | 0.29908296 | 0.369317751 | 0.470078672 |
| cg07656922 | SLC38A1C | 17 | 0.00325324 | 0.30528707 | 0.282968581 | 0.454027038 |
| cg02339793 | SLC38A1C | 17 | 0.00206218 | 0.34435226 | 0.353372599 | 0.54038016  |
| cg18025838 | SLC38A1C | 17 | 0.00429038 | 0.60223636 | 0.570170228 | 0.70658356  |
| cg14019146 | SLC38A3  | 3  | 0.00856489 | 0.15288828 | 0.143966466 | 0.258524967 |
| cg04682699 | SLC38A3  | 3  | 0.00279442 | 0.32453425 | 0.356947057 | 0.471794465 |
| cg22059438 | SLC39A4  | 8  | 0.02911369 | 0.35678695 | 0.340274749 | 0.461467949 |
| cg21461745 | SLC39A11 | 17 | 0.00442346 | 0.38781491 | 0.472876312 | 0.634322611 |
| cg24136932 | SLC39A14 | 8  | 0.00604317 | 0.44149848 | 0.521539114 | 0.637005107 |
| cg26750489 | SLC39A7; | 6  | 0.00168532 | 0.58809175 | 0.536503954 | 0.759119134 |
| cg25059165 | SLC39A7; | 6  | 0.0027878  | 0.33531256 | 0.318424743 | 0.499658228 |
| cg21580456 | SLC41A3; | 3  | 0.00203531 | 0.46300261 | 0.47060732  | 0.603324061 |
| cg09478995 | SLC43A1  | 11 | 0.0048909  | 0.48452446 | 0.509405321 | 0.630943505 |
| cg17330838 | SLC43A1  | 11 | 0.00381594 | 0.18407047 | 0.17885962  | 0.293206884 |
| cg27315497 | SLC43A1  | 11 | 0.00065949 | 0.14946697 | 0.206009353 | 0.367168653 |
| cg09361598 | SLC43A2  | 17 | 0.02595684 | 0.29645606 | 0.321173873 | 0.437494723 |
| cg09197783 | SLC43A3; | 11 | 0.00617318 | 0.65147187 | 0.639021522 | 0.759229915 |
| cg06561886 | SLC44A2; | 19 | 0.00359274 | 0.33385304 | 0.288362627 | 0.443129643 |
| cg06033721 | SLC44A3; | 1  | 0.00481427 | 0.57932765 | 0.589055228 | 0.734007204 |
| cg01921484 | SLC45A4  | 8  | 0.01943315 | 0.71305594 | 0.630448754 | 0.893973876 |
| cg22073332 | SLC4A4;S | 4  | 0.00432931 | 0.52508952 | 0.554731308 | 0.667539113 |
| cg13763232 | SLC6A6;S | 3  | 0.00405622 | 0.27251408 | 0.269730703 | 0.422789038 |
| cg04833514 | SLC6A9   | 1  | 0.0212437  | 0.47729937 | 0.474691559 | 0.584246826 |
| cg10752421 | SLC7A1   | 13 | 0.00202547 | 0.44739152 | 0.503626903 | 0.65385044  |
| cg26117398 | SLC7A1   | 13 | 0.00344347 | 0.1930356  | 0.160344757 | 0.305338177 |
| cg06665333 | SLC7A5   | 16 | 0.00083329 | 0.70807752 | 0.7283224   | 0.843208659 |
| cg04171052 | SLC7A5   | 16 | 0.00182941 | 0.28572278 | 0.304980306 | 0.471375974 |
| cg26637881 | SLC7A5   | 16 | 0.00227742 | 0.27009258 | 0.276984594 | 0.450510022 |
| cg12833872 | SLC9A3   | 5  | 0.00480838 | 0.13294638 | 0.118981557 | 0.24066077  |
| cg08074555 | SLC9A3R2 | 16 | 0.01009622 | 0.17930055 | 0.146486038 | 0.282675379 |
| cg03158310 | SLC9A3R2 | 16 | 0.01991471 | 0.27008964 | 0.248570691 | 0.375728414 |
| cg01346158 | SLC9A3R2 | 16 | 0.00113894 | 0.60787174 | 0.61101578  | 0.864099101 |
| cg04558907 | SLC9A9   | 3  | 0.02111228 | 0.61224378 | 0.593591756 | 0.712273219 |
| cg04860674 | SLC9A9   | 3  | 0.03120023 | 0.36765382 | 0.415809657 | 0.519823227 |
| cg13008977 | SLIT3    | 5  | 0.00101815 | 0.32554405 | 0.400487744 | 0.562567208 |
| cg13908833 | SLIT3    | 5  | 0.00258198 | 0.37815148 | 0.369186629 | 0.478857645 |
| cg21953891 | SLIT3    | 5  | 0.00337598 | 0.23729055 | 0.216614496 | 0.428240387 |
| cg05906024 | SLIT3    | 5  | 0.00133856 | 0.34700028 | 0.396034823 | 0.635970519 |
| cg25984601 | SLIT3    | 5  | 0.00168656 | 0.24755521 | 0.247610717 | 0.449278365 |
| cg17229698 | SLIT3    | 5  | 0.00147518 | 0.32681263 | 0.383381263 | 0.581476761 |
| cg18364770 | SLIT3    | 5  | 0.00156239 | 0.26273161 | 0.280242883 | 0.397968413 |
| cg22631387 | SLIT3    | 5  | 0.00170786 | 0.63070971 | 0.640875123 | 0.74926929  |

|            |         |    |            |            |             |             |
|------------|---------|----|------------|------------|-------------|-------------|
| cg04093349 | SMAD6;S | 15 | 0.00459107 | 0.56723119 | 0.556225505 | 0.673942014 |
| cg23172828 | SMAD6;S | 15 | 0.01095648 | 0.63253988 | 0.624746092 | 0.766256675 |
| cg00350432 | SMAD6;S | 15 | 0.00202967 | 0.35179358 | 0.389826025 | 0.512440907 |
| cg02184281 | SMAD7   | 18 | 0.00471363 | 0.54063343 | 0.521405025 | 0.710858197 |
| cg19430553 | SMAD7   | 18 | 0.0135118  | 0.19256963 | 0.172678222 | 0.335508088 |
| cg08151828 | SMARCA4 | 19 | 0.01980822 | 0.3002768  | 0.294848805 | 0.445144147 |
| cg01982788 | SMARCC2 | 12 | 0.00440148 | 0.21179985 | 0.220611216 | 0.321219648 |
| cg02596233 | SMARCD3 | 7  | 0.00333032 | 0.37157553 | 0.352947273 | 0.497715002 |
| cg14636077 | SMCR5;R | 17 | 0.00211366 | 0.4205669  | 0.467827663 | 0.61714116  |
| cg08593157 | SMCR5;R | 17 | 0.00215739 | 0.12027342 | 0.119207927 | 0.229035018 |
| cg06217803 | SMO     | 7  | 0.00670817 | 0.26099569 | 0.268725278 | 0.373250626 |
| cg18653027 | SMOC1;S | 14 | 0.01311902 | 0.47218933 | 0.49590922  | 0.619416077 |
| cg23972474 | SMOC1;S | 14 | 0.00126804 | 0.13628648 | 0.165670051 | 0.277318734 |
| cg02873263 | SMOC1;S | 14 | 0.00344865 | 0.49404444 | 0.479639147 | 0.631350974 |
| cg19628299 | SMOC2;S | 6  | 0.00182941 | 0.1882879  | 0.203083733 | 0.33478041  |
| cg14329365 | SMOC2;S | 6  | 0.00141699 | 0.31903492 | 0.344705563 | 0.468328432 |
| cg13705956 | SMOC2;S | 6  | 0.00311324 | 0.41659383 | 0.469466652 | 0.595258055 |
| cg10041417 | SMOC2;S | 6  | 0.00184921 | 0.25961034 | 0.26495154  | 0.498707108 |
| cg02662873 | SMOC2;S | 6  | 0.01163705 | 0.67035565 | 0.671686626 | 0.778278199 |
| cg04967737 | SMOC2;S | 6  | 0.00379406 | 0.43729313 | 0.429752826 | 0.61723373  |
| cg09499136 | SMOC2;S | 6  | 0.00537713 | 0.40242774 | 0.374633943 | 0.557593819 |
| cg24114708 | SMOC2;S | 6  | 0.00289141 | 0.34360807 | 0.384623564 | 0.572441765 |
| cg02129017 | SMOC2;S | 6  | 0.00144352 | 0.58175419 | 0.603912698 | 0.743757627 |
| cg25599473 | SMOC2;S | 6  | 0.01029727 | 0.22636618 | 0.206491075 | 0.384453704 |
| cg08112248 | SMOC2;S | 6  | 0.01313275 | 0.47037888 | 0.450623771 | 0.586480802 |
| cg14806083 | SMOC2;S | 6  | 0.02381297 | 0.31305523 | 0.367082198 | 0.495965586 |
| cg17802216 | SMOC2;S | 6  | 0.00099652 | 0.47901904 | 0.552367512 | 0.736758604 |
| cg04467832 | SMOC2;S | 6  | 0.00104778 | 0.34765869 | 0.36933065  | 0.496574712 |
| cg22967008 | SMOC2;S | 6  | 0.00076471 | 0.46950827 | 0.586302021 | 0.708937784 |
| cg26505935 | SMOC2;S | 6  | 0.00636561 | 0.48470146 | 0.517219651 | 0.640811761 |
| cg03490766 | SMOC2;S | 6  | 0.00179812 | 0.52589364 | 0.556737263 | 0.66383652  |
| cg15741247 | SMOC2;S | 6  | 0.0034485  | 0.58868683 | 0.595778229 | 0.724029875 |
| cg21755672 | SMOC2;S | 6  | 0.00531242 | 0.63009296 | 0.57441894  | 0.747802001 |
| cg22771904 | SMOC2;S | 6  | 0.00271346 | 0.28235015 | 0.227162652 | 0.566583012 |
| cg15792134 | SMOC2;S | 6  | 0.03137447 | 0.19718524 | 0.178995332 | 0.310708149 |
| cg07979566 | SMOC2;S | 6  | 0.00212345 | 0.54340523 | 0.612434329 | 0.719730268 |
| cg01210622 | SMPD3   | 16 | 0.01206219 | 0.38678029 | 0.340045382 | 0.498783476 |
| cg27045405 | SMPD3   | 16 | 0.00160662 | 0.58521052 | 0.594909931 | 0.724166165 |
| cg00532477 | SMPD4;S | 2  | 0.00801038 | 0.37103123 | 0.40052987  | 0.528706486 |
| cg02973057 | SMTN;SM | 22 | 0.00713358 | 0.32336938 | 0.274317771 | 0.494733736 |
| cg02415020 | SMYD3;S | 1  | 0.00379918 | 0.435932   | 0.451369902 | 0.604167493 |
| cg22024479 | SMYD3;S | 1  | 0.00403008 | 0.34003829 | 0.342705442 | 0.535377851 |
| cg12461735 | SMYD3;S | 1  | 0.00176816 | 0.32180146 | 0.322468983 | 0.54419971  |
| cg18121962 | SMYD3;S | 1  | 0.0144255  | 0.28639133 | 0.355460112 | 0.466247966 |
| cg18592195 | SNAP47  | 1  | 0.02548197 | 0.30275891 | 0.259906091 | 0.423528248 |
| cg05073044 | SNAPC1  | 14 | 0.0019957  | 0.31569128 | 0.398697596 | 0.587402141 |

|            |          |    |            |            |             |             |
|------------|----------|----|------------|------------|-------------|-------------|
| cg20643991 | SNCAIP   | 5  | 0.03750141 | 0.31447833 | 0.291882688 | 0.443723176 |
| cg22171145 | SND1     | 7  | 0.00958999 | 0.28037394 | 0.235647836 | 0.393973011 |
| cg00092551 | SND1     | 7  | 0.00201167 | 0.18074342 | 0.187989115 | 0.351414144 |
| cg14678084 | SND1     | 7  | 0.00314361 | 0.13256622 | 0.098547884 | 0.252502684 |
| cg11857142 | SND1     | 7  | 0.00097053 | 0.20248813 | 0.227906004 | 0.394395215 |
| cg09991306 | SNED1    | 2  | 0.01935097 | 0.33031406 | 0.364396832 | 0.470443494 |
| cg22635676 | SNED1    | 2  | 0.00073265 | 0.13376029 | 0.181494609 | 0.385253222 |
| cg23491743 | SNED1    | 2  | 0.00556197 | 0.3815106  | 0.379177048 | 0.500349326 |
| cg25241559 | SNED1    | 2  | 0.00384818 | 0.62112586 | 0.692547028 | 0.796665247 |
| cg21393619 | SNORA27  | 13 | 0.03434255 | 0.14289365 | 0.110765738 | 0.247359693 |
| cg23234674 | SNORA74  | 5  | 0.00931986 | 0.21464403 | 0.187355448 | 0.316226468 |
| cg15889424 | SNORA80  | 21 | 0.00068904 | 0.33697918 | 0.400123329 | 0.565043941 |
| cg09199848 | SNORA80  | 21 | 0.00245827 | 0.45726954 | 0.487907863 | 0.602679825 |
| cg15075241 | SNORA80  | 2  | 0.00065949 | 0.4163127  | 0.569765073 | 0.716638431 |
| cg24722354 | SNORD1C  | 1  | 0.00878702 | 0.47364882 | 0.498487136 | 0.667131613 |
| cg27565803 | SNORD1C  | 1  | 0.00589356 | 0.25663499 | 0.223146803 | 0.413469855 |
| cg00581541 | SNORD1C  | 1  | 0.0062271  | 0.64257696 | 0.626518424 | 0.790044902 |
| cg00098985 | SNPH     | 20 | 0.00159903 | 0.21781648 | 0.221848434 | 0.354713322 |
| cg13399741 | SNPH     | 20 | 0.0008696  | 0.21415179 | 0.229186575 | 0.352138436 |
| cg14992108 | SNTB1    | 8  | 0.00354163 | 0.62417571 | 0.630437244 | 0.761742707 |
| cg25352714 | SNX1;SN  | 15 | 0.01257717 | 0.56675375 | 0.508506776 | 0.688610613 |
| cg14556808 | SNX19    | 11 | 0.00195    | 0.65616904 | 0.61445509  | 0.799003116 |
| cg08763673 | SNX2     | 5  | 0.00209505 | 0.65135202 | 0.614993637 | 0.775983681 |
| cg03512808 | SNX29    | 16 | 0.0355165  | 0.48093703 | 0.476054553 | 0.597938444 |
| cg08073667 | SNX29    | 16 | 0.00606409 | 0.57692273 | 0.603943959 | 0.709400985 |
| cg12205429 | SNX8     | 7  | 0.00679551 | 0.15256657 | 0.119561368 | 0.266112642 |
| cg09672545 | SNX9     | 6  | 0.00394919 | 0.59113505 | 0.551911637 | 0.71810105  |
| cg00429523 | SOBP     | 6  | 0.01753222 | 0.41273941 | 0.402448762 | 0.538035372 |
| cg07944936 | SOBP     | 6  | 0.00491697 | 0.14075209 | 0.11796474  | 0.252544139 |
| cg06583438 | SOBP     | 6  | 0.00298303 | 0.52072199 | 0.612765732 | 0.713085437 |
| cg17217443 | SOCS7    | 17 | 0.00569156 | 0.16611369 | 0.135354402 | 0.30560985  |
| cg01123186 | SOCS7    | 17 | 0.00805596 | 0.16177441 | 0.137973798 | 0.325619276 |
| cg05679440 | SOLH     | 16 | 0.00204611 | 0.44250208 | 0.410949664 | 0.556616625 |
| cg04076387 | SOLH     | 16 | 0.00798815 | 0.52381098 | 0.51135324  | 0.642545548 |
| cg17369406 | SON;SON  | 21 | 0.00975209 | 0.32242867 | 0.407699615 | 0.510429057 |
| cg16622520 | SORBS1;S | 10 | 0.00219711 | 0.27631772 | 0.282790113 | 0.459947746 |
| cg12197399 | SORBS2   | 4  | 0.00367708 | 0.27406384 | 0.294675397 | 0.442686912 |
| cg16871385 | SORBS2   | 4  | 0.00853102 | 0.23819324 | 0.289227272 | 0.399198222 |
| cg19216056 | SORBS2;S | 4  | 0.01771787 | 0.22087632 | 0.217306913 | 0.360413295 |
| cg26583078 | SORBS2;S | 4  | 0.00582851 | 0.17699275 | 0.196883497 | 0.384399576 |
| cg15883603 | SORBS2;S | 4  | 0.04016502 | 0.17338522 | 0.197313894 | 0.308931062 |
| cg18515303 | SORCS1;S | 10 | 0.01033091 | 0.25733832 | 0.256497714 | 0.390285446 |
| cg23649083 | SORCS2   | 4  | 0.00095484 | 0.36742708 | 0.375125037 | 0.487471952 |
| cg14180415 | SORCS2   | 4  | 0.00174783 | 0.35705049 | 0.385938871 | 0.515110448 |
| cg18803251 | SORCS2   | 4  | 0.0040624  | 0.61395899 | 0.642221498 | 0.786444698 |
| cg19593680 | SORCS2   | 4  | 0.01613643 | 0.31191601 | 0.315909126 | 0.454437135 |



|            |           |    |            |            |             |             |
|------------|-----------|----|------------|------------|-------------|-------------|
| cg15989318 | SORCS3    | 10 | 0.01377008 | 0.19825359 | 0.178500802 | 0.309604452 |
| cg01898628 | SOST      | 17 | 0.00677233 | 0.31579627 | 0.332206995 | 0.478796315 |
| cg10473369 | SOX15     | 17 | 0.00685368 | 0.32678384 | 0.305508146 | 0.438029026 |
| cg06205574 | SOX5;SO)  | 12 | 0.00099274 | 0.33868245 | 0.433894381 | 0.675529712 |
| cg06764736 | SOX5;SO)  | 12 | 0.00079512 | 0.73196143 | 0.65915592  | 0.856708713 |
| cg26716834 | SOX8      | 16 | 0.00133251 | 0.63462729 | 0.638800922 | 0.789662207 |
| cg08992854 | SOX8      | 16 | 0.00458661 | 0.31396218 | 0.27224507  | 0.565151065 |
| cg06234051 | SOX9      | 17 | 0.01365382 | 0.18640743 | 0.173170121 | 0.301621534 |
| cg18693004 | SP4       | 7  | 0.02308074 | 0.34100621 | 0.410701879 | 0.546624644 |
| cg06571753 | SPARC     | 5  | 0.00763406 | 0.31145029 | 0.34033618  | 0.483226758 |
| cg27460824 | SPATA13;  | 13 | 0.00656134 | 0.23296557 | 0.232977039 | 0.463387338 |
| cg25104266 | SPATA13;  | 13 | 0.01977061 | 0.47337303 | 0.498552853 | 0.634354538 |
| cg01688202 | SPATA2;S  | 20 | 0.00530406 | 0.37621862 | 0.39797243  | 0.534345113 |
| cg06905367 | SPATS2L;: | 2  | 0.01891191 | 0.22061506 | 0.210595591 | 0.362337856 |
| cg00556627 | SPATS2L;: | 2  | 0.02169667 | 0.66543439 | 0.641567217 | 0.777380793 |
| cg14106933 | SPATS2L;: | 2  | 0.00458537 | 0.33605379 | 0.370487988 | 0.511309934 |
| cg02882004 | SPATS2L;: | 2  | 0.00295368 | 0.18684923 | 0.142991291 | 0.366647434 |
| cg07180355 | SPEN      | 1  | 0.002727   | 0.50660775 | 0.524153865 | 0.626233593 |
| cg15754752 | SPG20     | 13 | 0.00131453 | 0.16810494 | 0.195686865 | 0.482949306 |
| cg21056788 | SPG20     | 13 | 0.00279455 | 0.16116388 | 0.165447043 | 0.33581867  |
| cg05635923 | SPG20     | 13 | 0.00248044 | 0.26519186 | 0.305419813 | 0.57975526  |
| cg21484515 | SPG20     | 13 | 0.01457962 | 0.20690294 | 0.160860286 | 0.347268183 |
| cg00084432 | SPG20     | 13 | 0.00756169 | 0.17767978 | 0.157115951 | 0.360415137 |
| cg09410612 | SPG20     | 13 | 0.00717306 | 0.24427067 | 0.267323669 | 0.368740058 |
| cg01279418 | SPG7      | 16 | 0.00375204 | 0.53320351 | 0.487918374 | 0.657609315 |
| cg02207944 | SPG7;SPC  | 16 | 0.01842786 | 0.56359443 | 0.542131739 | 0.668824872 |
| cg01539849 | SPI1;SPI1 | 11 | 0.02087024 | 0.31284667 | 0.269413406 | 0.425364678 |
| cg14074366 | SPIN1     | 9  | 0.02050584 | 0.21235255 | 0.168813798 | 0.341159671 |
| cg00401471 | SPINT2;Sf | 19 | 0.00299315 | 0.23799513 | 0.321873705 | 0.483802777 |
| cg05604800 | SPIRE2    | 16 | 0.01456284 | 0.48798368 | 0.498540457 | 0.611027068 |
| cg20551922 | SPNS3     | 17 | 0.00155548 | 0.30934953 | 0.322601825 | 0.50493352  |
| cg02065148 | SPON2;SF  | 4  | 0.00074381 | 0.36219039 | 0.452716374 | 0.558580972 |
| cg01571977 | SPPL2B;Sf | 19 | 0.00586842 | 0.26066585 | 0.27294132  | 0.381479324 |
| cg22854448 | SPRED2    | 2  | 0.00065949 | 0.19428879 | 0.361311969 | 0.617839323 |
| cg08651590 | SPRED2;S  | 2  | 0.00065949 | 0.16983606 | 0.225141283 | 0.482151588 |
| cg23632432 | SPSB1     | 1  | 0.00124152 | 0.31431368 | 0.347874322 | 0.528302283 |
| cg09256832 | SPSB1     | 1  | 0.00459082 | 0.22365031 | 0.219600632 | 0.421916813 |
| cg04778236 | SPSB1     | 1  | 0.01515174 | 0.25152851 | 0.259212495 | 0.390947636 |
| cg24597774 | SPSB1     | 1  | 0.01269426 | 0.19206662 | 0.162837359 | 0.305607196 |
| cg26348847 | SPTB      | 14 | 0.00129968 | 0.18106985 | 0.190389594 | 0.29365035  |
| cg02531794 | SRCRB4D   | 7  | 0.01162689 | 0.32735311 | 0.319216836 | 0.470604436 |
| cg23875758 | SREBF1;S  | 17 | 0.00206218 | 0.17761804 | 0.174162128 | 0.331454622 |
| cg17354987 | SRGAP1    | 12 | 0.00930715 | 0.44018877 | 0.533412017 | 0.638241853 |
| cg04938109 | SRGAP1    | 12 | 0.03951832 | 0.44598368 | 0.423631037 | 0.592382043 |
| cg11014073 | SRGAP1    | 12 | 0.00161582 | 0.27704132 | 0.309955459 | 0.572177924 |
| cg12587213 | SRGAP2;S  | 1  | 0.00398606 | 0.72439209 | 0.763376219 | 0.863975935 |

|            |           |    |            |            |             |             |
|------------|-----------|----|------------|------------|-------------|-------------|
| cg05905586 | SSBP2     | 5  | 0.00756169 | 0.33472461 | 0.331956424 | 0.53908603  |
| cg06988422 | SSBP3;SSI | 1  | 0.0042395  | 0.43973424 | 0.453073612 | 0.622279847 |
| cg23544107 | SSBP4;SSI | 19 | 0.00158181 | 0.24504738 | 0.226289701 | 0.345306551 |
| cg24878115 | SSBP4;SSI | 19 | 0.00081925 | 0.26277577 | 0.345397466 | 0.519777143 |
| cg19589652 | SSC5D     | 19 | 0.00703549 | 0.32071279 | 0.308602351 | 0.446000311 |
| cg14338936 | SSH2      | 17 | 0.01334584 | 0.39598067 | 0.342683275 | 0.528128929 |
| cg06422039 | SSTR5;LO  | 16 | 0.01093065 | 0.2265755  | 0.181510493 | 0.350241869 |
| cg18312113 | SSU72     | 1  | 0.00211366 | 0.51650334 | 0.541547767 | 0.671792933 |
| cg24991874 | ST14      | 11 | 0.01663906 | 0.47541753 | 0.509393309 | 0.63980568  |
| cg05284912 | ST14      | 11 | 0.00290605 | 0.14361063 | 0.149755205 | 0.264001192 |
| cg04273299 | ST3GAL1;  | 8  | 0.00748137 | 0.54954963 | 0.523775019 | 0.71620224  |
| cg12831076 | ST3GAL1;  | 8  | 0.02133627 | 0.31574009 | 0.254018866 | 0.419573077 |
| cg11015768 | ST3GAL5   | 2  | 0.00218063 | 0.19352198 | 0.192130914 | 0.355876749 |
| cg00249584 | ST5;ST5;S | 11 | 0.00367708 | 0.14176635 | 0.147955297 | 0.296348946 |
| cg11020894 | ST6GAL1;  | 3  | 0.00245414 | 0.20045479 | 0.227681441 | 0.446197774 |
| cg05720226 | ST7;ST7;S | 7  | 0.00234919 | 0.40302244 | 0.430954262 | 0.57309041  |
| cg25784872 | STAG1     | 3  | 0.02385226 | 0.4259504  | 0.432465923 | 0.597435284 |
| cg03906031 | STARD10   | 11 | 0.00092849 | 0.5611794  | 0.59891609  | 0.710604454 |
| cg03575969 | STARD10   | 11 | 0.00353178 | 0.19331321 | 0.186719904 | 0.304191643 |
| cg13860360 | STARD13   | 13 | 0.0042141  | 0.12364586 | 0.097381116 | 0.224461388 |
| cg01146501 | STARD4    | 5  | 0.00422785 | 0.26898541 | 0.314226033 | 0.460305557 |
| cg12312086 | STARD9    | 15 | 0.00113577 | 0.32717335 | 0.37758318  | 0.572223252 |
| cg20173260 | STAT1;ST  | 2  | 0.00099274 | 0.21530579 | 0.239432595 | 0.534098476 |
| cg14951497 | STAT1;ST  | 2  | 0.02817047 | 0.43219424 | 0.446665999 | 0.582972434 |
| cg02733918 | STAU1;ST  | 20 | 0.04539328 | 0.43391018 | 0.44275195  | 0.552161963 |
| cg19728382 | STC2      | 5  | 0.00065949 | 0.17728222 | 0.244424097 | 0.359640558 |
| cg07109745 | STIM1     | 11 | 0.00147518 | 0.21232804 | 0.260928024 | 0.451778258 |
| cg10564791 | STK10     | 5  | 0.00141131 | 0.43925524 | 0.466854689 | 0.59669682  |
| cg23423191 | STK10     | 5  | 0.00102765 | 0.47312211 | 0.523172554 | 0.684268872 |
| cg03534504 | STK10     | 5  | 0.00078196 | 0.27803651 | 0.37757541  | 0.619927858 |
| cg26006084 | STK10     | 5  | 0.01782206 | 0.33736089 | 0.324942616 | 0.447920359 |
| cg16711597 | STK24     | 13 | 0.00197576 | 0.52115819 | 0.476190264 | 0.694759755 |
| cg09110502 | STK24     | 13 | 0.00126816 | 0.41701956 | 0.545474925 | 0.686820467 |
| cg07340007 | STK24;STI | 13 | 0.0020873  | 0.11192874 | 0.118854166 | 0.271716003 |
| cg16924565 | STK24;STI | 13 | 0.00855749 | 0.56143921 | 0.515573263 | 0.687848098 |
| cg01442200 | STK24;STI | 13 | 0.00073547 | 0.49920976 | 0.548937761 | 0.736102525 |
| cg11966803 | STK24;STI | 13 | 0.00756169 | 0.54241174 | 0.563195004 | 0.696268085 |
| cg23724635 | STK24;STI | 13 | 0.00806542 | 0.66097449 | 0.67327237  | 0.791557418 |
| cg10533161 | STK24;STI | 13 | 0.00230968 | 0.46870893 | 0.44238473  | 0.606025156 |
| cg14582191 | STK32B    | 4  | 0.00124152 | 0.36975572 | 0.494854403 | 0.632814275 |
| cg16033410 | STK32C    | 10 | 0.01240534 | 0.52119604 | 0.488922885 | 0.621603446 |
| cg18518262 | STK32C    | 10 | 0.02340764 | 0.2396565  | 0.22502829  | 0.342360353 |
| cg15246131 | STK32C    | 10 | 0.00948686 | 0.19650219 | 0.271809507 | 0.381124693 |
| cg23433370 | STK38L    | 12 | 0.00639646 | 0.28409175 | 0.332685499 | 0.448960328 |
| cg13345122 | STK39     | 2  | 0.0065693  | 0.23376071 | 0.322395735 | 0.447671869 |
| cg07992385 | STK39     | 2  | 0.01440243 | 0.21322207 | 0.220362158 | 0.373680145 |

|            |           |    |            |            |             |             |
|------------|-----------|----|------------|------------|-------------|-------------|
| cg13431028 | STK39     | 2  | 0.00480767 | 0.19755053 | 0.214646236 | 0.365628272 |
| cg11775828 | STK39     | 2  | 0.00123203 | 0.19600906 | 0.246518201 | 0.370047961 |
| cg06631999 | STMN1     | 1  | 0.00193817 | 0.35282026 | 0.403575598 | 0.600596984 |
| cg13668495 | STRBP;ST  | 9  | 0.00568196 | 0.45989224 | 0.505704413 | 0.650650116 |
| cg02068351 | STX7      | 6  | 0.00504019 | 0.2544512  | 0.277777798 | 0.39750826  |
| cg04225902 | SUB1      | 5  | 0.00971274 | 0.60435148 | 0.610211922 | 0.736598655 |
| cg02662441 | SUFU      | 10 | 0.00289119 | 0.72679545 | 0.71782099  | 0.842575513 |
| cg03369906 | SUFU      | 10 | 0.00286384 | 0.20769143 | 0.166898549 | 0.334446332 |
| cg10260044 | SULF1;SU  | 8  | 0.00209505 | 0.25068995 | 0.221876468 | 0.465269159 |
| cg21130926 | SULF2;SU  | 20 | 0.02418358 | 0.48659735 | 0.109577751 | 0.287419462 |
| cg01003859 | SULT1C2;  | 2  | 0.00430406 | 0.39121473 | 0.378990427 | 0.537362684 |
| cg25426867 | SVIL;MIR  | 10 | 0.00231479 | 0.15943507 | 0.173058407 | 0.343285177 |
| cg24726783 | SVIL;SVIL | 10 | 0.001445   | 0.66623348 | 0.663563071 | 0.774378983 |
| cg25334461 | SVIL;SVIL | 10 | 0.01044398 | 0.59780968 | 0.586688906 | 0.737167969 |
| cg03108697 | SWAP70    | 11 | 0.00714351 | 0.4543581  | 0.466574418 | 0.670748531 |
| cg08010619 | SWAP70    | 11 | 0.00092022 | 0.20265991 | 0.25001902  | 0.443543145 |
| cg10023915 | SWAP70    | 11 | 0.01216466 | 0.67325735 | 0.682366682 | 0.78976027  |
| cg15173428 | SYN3;SYN  | 22 | 0.00747148 | 0.27483957 | 0.316692236 | 0.430436775 |
| cg19987354 | SYNE2;SY  | 14 | 0.00168532 | 0.23566126 | 0.253109598 | 0.521148141 |
| cg13057576 | SYNE2;SY  | 14 | 0.0218987  | 0.57579241 | 0.558888979 | 0.680106695 |
| cg01340991 | SYNGAP1   | 6  | 0.00201017 | 0.31049141 | 0.340350708 | 0.465014618 |
| cg14533068 | SYNJ2     | 6  | 0.00081925 | 0.24507996 | 0.305668715 | 0.46475945  |
| cg05951351 | SYNM;SYI  | 15 | 0.03680055 | 0.54520266 | 0.541055791 | 0.663182234 |
| cg05106892 | SYNM;SYI  | 15 | 0.00537348 | 0.26599463 | 0.235544347 | 0.383223165 |
| cg01228193 | SYNPO     | 5  | 0.0012838  | 0.23675454 | 0.237459206 | 0.464220213 |
| cg26444282 | SYNPO;SY  | 5  | 0.00911948 | 0.30840459 | 0.260405544 | 0.432093315 |
| cg05714559 | SYNPO;SY  | 5  | 0.0091896  | 0.32721471 | 0.269571139 | 0.437740289 |
| cg06559925 | SYNPO;SY  | 5  | 0.00111057 | 0.3120802  | 0.330781553 | 0.49128599  |
| cg01025434 | SYNPO;SY  | 5  | 0.00197007 | 0.18096355 | 0.181843081 | 0.356047759 |
| cg03634767 | SYNPO;SY  | 5  | 0.00656134 | 0.47980492 | 0.495603256 | 0.645183549 |
| cg13991728 | SYNPO;SY  | 5  | 0.00140436 | 0.20672209 | 0.212712099 | 0.452743775 |
| cg27039501 | SYNPO;SY  | 5  | 0.00126059 | 0.41282705 | 0.400547975 | 0.661327353 |
| cg18416096 | SYNPO;SY  | 5  | 0.00101815 | 0.33701172 | 0.335448218 | 0.450079935 |
| cg02991753 | SYNPO2    | 4  | 0.01311533 | 0.45639705 | 0.537029135 | 0.649266408 |
| cg05697785 | SYNPO2L   | 10 | 0.0097835  | 0.41369777 | 0.440594651 | 0.552399715 |
| cg27550918 | SYNPO2L   | 10 | 0.0018345  | 0.29221722 | 0.306841801 | 0.476696242 |
| cg09575189 | SYT8      | 11 | 0.00080095 | 0.38653645 | 0.45178664  | 0.594251237 |
| cg02294791 | SYT8      | 11 | 0.00068904 | 0.42873127 | 0.500035546 | 0.632201228 |
| cg21544658 | SYT8      | 11 | 0.00066232 | 0.39963293 | 0.482058522 | 0.607422891 |
| cg24331162 | SYT8      | 11 | 0.00073118 | 0.36281484 | 0.418334482 | 0.556807376 |
| cg12748890 | SYTL1     | 1  | 0.02469417 | 0.18200683 | 0.141754052 | 0.282316897 |
| cg11123303 | TAAR2     | 6  | 0.03100155 | 0.44690492 | 0.423035266 | 0.572733357 |
| cg11404751 | TACC2;TA  | 10 | 0.04904378 | 0.22316433 | 0.21945264  | 0.334075066 |
| cg11535638 | TACC2;TA  | 10 | 0.00971058 | 0.53205629 | 0.524002009 | 0.666845647 |
| cg02684964 | TACR2     | 10 | 0.00458992 | 0.26538549 | 0.262533988 | 0.385416858 |
| cg00563768 | TAF15;TA  | 17 | 0.03035371 | 0.20444719 | 0.227369226 | 0.327470377 |

|            |          |    |            |            |             |             |
|------------|----------|----|------------|------------|-------------|-------------|
| cg05595429 | TAF1A;TA | 1  | 0.01852003 | 0.23844977 | 0.258000942 | 0.375738757 |
| cg13257421 | TAF1B    | 2  | 0.00297143 | 0.12763963 | 0.130851023 | 0.251677695 |
| cg00473045 | TAF2     | 8  | 0.00301844 | 0.21688955 | 0.164352011 | 0.407825052 |
| cg18848959 | TAF4     | 20 | 0.00092849 | 0.19813586 | 0.197304829 | 0.37280299  |
| cg22778957 | TAF4     | 20 | 0.00135654 | 0.16938751 | 0.171718068 | 0.278062613 |
| cg20353780 | TAOK3    | 12 | 0.02802634 | 0.33053107 | 0.367174338 | 0.51070824  |
| cg10117400 | TBC1D14  | 4  | 0.00610999 | 0.15840293 | 0.127233471 | 0.263573484 |
| cg17854297 | TBC1D16  | 17 | 0.00158181 | 0.54951262 | 0.578002345 | 0.686129253 |
| cg07618085 | TBC1D16  | 17 | 0.03767458 | 0.63147882 | 0.646300114 | 0.769740389 |
| cg17295878 | TBC1D16  | 17 | 0.0022221  | 0.25735894 | 0.262896285 | 0.453011265 |
| cg23651872 | TBC1D16  | 17 | 0.01365382 | 0.278631   | 0.285807103 | 0.470386459 |
| cg19004465 | TBC1D16  | 17 | 0.02252087 | 0.21638932 | 0.203806903 | 0.361380184 |
| cg13466546 | TBC1D16  | 17 | 0.00065949 | 0.14995021 | 0.20062866  | 0.36734723  |
| cg06856735 | TBC1D16  | 17 | 0.00258141 | 0.34687143 | 0.314267106 | 0.465161608 |
| cg12314682 | TBC1D16  | 17 | 0.00520163 | 0.26592676 | 0.23862361  | 0.410875478 |
| cg16461139 | TBC1D16  | 17 | 0.00463097 | 0.43579681 | 0.408991808 | 0.637268938 |
| cg09675820 | TBC1D16  | 17 | 0.01426642 | 0.33699398 | 0.319959279 | 0.447169274 |
| cg24805759 | TBC1D16  | 17 | 0.00921039 | 0.16986636 | 0.153106379 | 0.271246405 |
| cg21048763 | TBC1D16  | 17 | 0.04196515 | 0.25873358 | 0.210376712 | 0.37023935  |
| cg07397612 | TBC1D22  | 22 | 0.00111301 | 0.26035689 | 0.270440026 | 0.601225383 |
| cg09692364 | TBC1D4   | 13 | 0.00295889 | 0.40154925 | 0.362360869 | 0.608554776 |
| cg12594615 | TBC1D8   | 2  | 0.00854392 | 0.38441432 | 0.382464383 | 0.51093218  |
| cg02050985 | TBC1D8   | 2  | 0.02773862 | 0.39766315 | 0.419505035 | 0.527096754 |
| cg17662369 | TBC1D9B  | 5  | 0.00552473 | 0.21240986 | 0.216655929 | 0.33132138  |
| cg11142556 | TBCD     | 17 | 0.03615697 | 0.49313064 | 0.480244337 | 0.622138924 |
| cg00830755 | TBCD     | 17 | 0.03541631 | 0.54101333 | 0.539004772 | 0.683960238 |
| cg08811443 | TBCD     | 17 | 0.0130683  | 0.68108044 | 0.718983932 | 0.870363571 |
| cg25399461 | TBCD     | 17 | 0.00425638 | 0.17285847 | 0.172390636 | 0.27298082  |
| cg13304638 | TBCD     | 17 | 0.01012853 | 0.30583436 | 0.396513358 | 0.509583113 |
| cg01771850 | TBCD     | 17 | 0.00249952 | 0.19240347 | 0.151657416 | 0.386163503 |
| cg05398905 | TBCD     | 17 | 0.00223558 | 0.18956952 | 0.163460825 | 0.34743674  |
| cg03535099 | TBCD     | 17 | 0.00381594 | 0.47760693 | 0.470287857 | 0.643220114 |
| cg02768197 | TBCD     | 17 | 0.00757332 | 0.45423002 | 0.447962929 | 0.610204283 |
| cg25055744 | TBCD;ZNF | 17 | 0.00832892 | 0.48446718 | 0.449182274 | 0.638798125 |
| cg04216936 | TBCK;TBC | 4  | 0.00237565 | 0.49029486 | 0.566755305 | 0.686277758 |
| cg10714160 | TBL1XR1  | 3  | 0.01195883 | 0.22011809 | 0.257778024 | 0.418136595 |
| cg03656099 | TBX2     | 17 | 0.00065949 | 0.12870331 | 0.247508571 | 0.407908581 |
| cg22635491 | TBX3;TBX | 12 | 0.00243287 | 0.2341952  | 0.362411428 | 0.470768148 |
| cg16277169 | TBX3;TBX | 12 | 0.00243925 | 0.41347978 | 0.48818017  | 0.634943914 |
| cg09413529 | TBX3;TBX | 12 | 0.00251443 | 0.38153359 | 0.418899231 | 0.527618559 |
| cg11246938 | TBX3;TBX | 12 | 0.0035878  | 0.46129596 | 0.500930812 | 0.647922628 |
| cg01078446 | TBX3;TBX | 12 | 0.00442269 | 0.3081052  | 0.391000726 | 0.50778132  |
| cg13030332 | TBX3;TBX | 12 | 0.00126059 | 0.58016327 | 0.64149055  | 0.814421947 |
| cg09053536 | TBX3;TBX | 12 | 0.00283769 | 0.53278535 | 0.572023675 | 0.771087943 |
| cg16406892 | TBX3;TBX | 12 | 0.00144365 | 0.3219171  | 0.464848156 | 0.601995158 |
| cg26196480 | TBX5;TBX | 12 | 0.00188499 | 0.17380981 | 0.2608949   | 0.395568137 |

|            |           |    |            |            |             |             |
|------------|-----------|----|------------|------------|-------------|-------------|
| cg16458436 | TBX5;TBX  | 12 | 0.0194986  | 0.27169847 | 0.303899306 | 0.415128858 |
| cg16559598 | TBX5;TBX  | 12 | 0.00178269 | 0.12110663 | 0.195433595 | 0.310582738 |
| cg06911121 | TBX5;TBX  | 12 | 0.00160732 | 0.1253986  | 0.189588803 | 0.341756218 |
| cg12670347 | TBX5;TBX  | 12 | 0.0135118  | 0.35516959 | 0.387356819 | 0.501124137 |
| cg05555207 | TBX5;TBX  | 12 | 0.0035878  | 0.18113093 | 0.214969532 | 0.395909276 |
| cg03559073 | TBX5;TBX  | 12 | 0.00183659 | 0.12373557 | 0.194424658 | 0.296883668 |
| cg12610207 | TBX5;TBX  | 12 | 0.00455738 | 0.12935099 | 0.161720342 | 0.283106933 |
| cg22929859 | TBX5;TBX  | 12 | 0.00523353 | 0.22466763 | 0.296863071 | 0.425915173 |
| cg04562909 | TBX5;TBX  | 12 | 0.03146035 | 0.23601723 | 0.259222944 | 0.391507334 |
| cg06725552 | TBX5;TBX  | 12 | 0.00165724 | 0.16008268 | 0.237890672 | 0.380591888 |
| cg17554126 | TBX5;TBX  | 12 | 0.00324717 | 0.19896223 | 0.293835361 | 0.4387511   |
| cg08184159 | TBX5;TBX  | 12 | 0.0017228  | 0.19299536 | 0.292846826 | 0.398648701 |
| cg25399352 | TBX5;TBX  | 12 | 0.00623289 | 0.20584144 | 0.292359029 | 0.409433434 |
| cg18689332 | TBX5;TBX  | 12 | 0.0011414  | 0.13582829 | 0.203030795 | 0.351473391 |
| cg11357746 | TBX5;TBX  | 12 | 0.00666111 | 0.15008203 | 0.189155961 | 0.331198767 |
| cg07658357 | TBX5;TBX  | 12 | 0.01068658 | 0.25349646 | 0.317209274 | 0.418907389 |
| cg11841394 | TBX5;TBX  | 12 | 0.00744196 | 0.14568772 | 0.178523501 | 0.290531793 |
| cg13823415 | TBXAS1;T  | 7  | 0.00196226 | 0.66838818 | 0.630778956 | 0.79564904  |
| cg09697084 | TBXAS1;T  | 7  | 0.02332665 | 0.62696835 | 0.624761937 | 0.727033809 |
| cg23759823 | TBXAS1;T  | 7  | 0.00854392 | 0.45775707 | 0.446975155 | 0.619505717 |
| cg06462921 | TBXAS1;T  | 7  | 0.00931986 | 0.44863216 | 0.420018142 | 0.590154823 |
| cg24348495 | TCEA2;TC  | 20 | 0.01158752 | 0.25446465 | 0.253332855 | 0.407834073 |
| cg03946671 | TCEA2;TC  | 20 | 0.00582851 | 0.16961401 | 0.159915927 | 0.290960787 |
| cg12176783 | TCEA2;TC  | 20 | 0.01230099 | 0.11799712 | 0.114342793 | 0.235448728 |
| cg12452800 | TCERG1L   | 10 | 0.01776628 | 0.34659544 | 0.341895232 | 0.48233869  |
| cg03303475 | TCF19;TC  | 6  | 0.03095521 | 0.40702512 | 0.425524758 | 0.52891297  |
| cg20217307 | TCF19;TC  | 6  | 0.00828598 | 0.67144073 | 0.659394014 | 0.809997485 |
| cg22207584 | TCF7L1    | 2  | 0.00189591 | 0.41369504 | 0.430250526 | 0.536998746 |
| cg07168930 | TCF7L2;T  | 10 | 0.01522043 | 0.34223713 | 0.41130414  | 0.522482248 |
| cg04743859 | TCIRG1;T  | 11 | 0.00405622 | 0.30752916 | 0.305478062 | 0.415090778 |
| cg04435320 | TCP11L1;  | 11 | 0.02791506 | 0.46870778 | 0.500080157 | 0.601395911 |
| cg27240158 | TEAD1     | 11 | 0.04832512 | 0.40451014 | 0.401135438 | 0.526015357 |
| cg18555698 | TEAD1     | 11 | 0.00866121 | 0.42167255 | 0.3920236   | 0.546977132 |
| cg25878366 | TEAD1     | 11 | 0.00149451 | 0.2979337  | 0.333680637 | 0.580877713 |
| cg15722533 | TEAD1     | 11 | 0.00173224 | 0.27558934 | 0.385193523 | 0.54596767  |
| cg24902858 | TECTA     | 11 | 0.00367963 | 0.37758848 | 0.399487077 | 0.54527514  |
| cg04370442 | TEPP;TEP  | 16 | 0.00343305 | 0.34064498 | 0.267165904 | 0.45589135  |
| cg19127638 | TET1      | 10 | 0.00315788 | 0.40908267 | 0.524400905 | 0.627161151 |
| cg01093854 | TET1      | 10 | 0.00174311 | 0.31091464 | 0.340353791 | 0.604276123 |
| cg04066190 | TFAP2A;T  | 6  | 0.00205966 | 0.13943951 | 0.219627276 | 0.340229948 |
| cg21082644 | TFDP1;TF  | 13 | 0.0048909  | 0.51680765 | 0.516275252 | 0.638242339 |
| cg18335233 | TG        | 8  | 0.00524789 | 0.3366872  | 0.407366041 | 0.564587324 |
| cg11155356 | TG;SLA;SI | 8  | 0.00227382 | 0.38450998 | 0.409545101 | 0.606188145 |
| cg16967578 | TGFBR2;TC | 1  | 0.01321831 | 0.31565995 | 0.381947182 | 0.546433869 |
| cg06270049 | TGFBR2;T  | 3  | 0.00452504 | 0.22932142 | 0.243030977 | 0.446597474 |
| cg05450916 | TGFBR2;T  | 3  | 0.00414415 | 0.34123196 | 0.36952951  | 0.555020488 |

|            |           |    |            |            |             |             |
|------------|-----------|----|------------|------------|-------------|-------------|
| cg24719910 | TGFBR2;T  | 3  | 0.00456818 | 0.34907371 | 0.405853332 | 0.56189269  |
| cg21814995 | TGFBR2;T  | 3  | 0.02636662 | 0.39215758 | 0.408765018 | 0.562498313 |
| cg03630790 | TGFBR2;T  | 3  | 0.00233284 | 0.47529061 | 0.546912159 | 0.680676843 |
| cg06047655 | THADA;TI  | 2  | 0.00841172 | 0.11644552 | 0.119570118 | 0.233327188 |
| cg06678594 | THADA;TI  | 2  | 0.02686773 | 0.47490617 | 0.500137974 | 0.633122512 |
| cg04684014 | THADA;TI  | 2  | 0.00219224 | 0.37691047 | 0.495377101 | 0.630705916 |
| cg21679402 | THAP4     | 2  | 0.02522711 | 0.63123503 | 0.607154249 | 0.737234451 |
| cg01637789 | THBS1     | 15 | 0.00997964 | 0.22853969 | 0.292138145 | 0.459460041 |
| cg00836101 | THBS1     | 15 | 0.01485881 | 0.23131273 | 0.248748671 | 0.425384381 |
| cg18234606 | THBS1     | 15 | 0.00463727 | 0.25058341 | 0.27378525  | 0.475863729 |
| cg16805094 | THBS2     | 6  | 0.00139627 | 0.26410224 | 0.309435835 | 0.45340421  |
| cg24391982 | THBS2     | 6  | 0.00116579 | 0.1976099  | 0.225641804 | 0.339360364 |
| cg14627862 | THBS2     | 6  | 0.00408989 | 0.40912022 | 0.358462095 | 0.580226621 |
| cg24462200 | THOP1     | 19 | 0.004607   | 0.69940575 | 0.717618156 | 0.848560949 |
| cg19919217 | THRA      | 17 | 0.00295256 | 0.18932111 | 0.182727027 | 0.31465504  |
| cg14829516 | THRA;NR   | 17 | 0.00337598 | 0.15057832 | 0.141910332 | 0.254193981 |
| cg01341751 | THRA;NR   | 17 | 0.00589429 | 0.27731867 | 0.278479768 | 0.390738248 |
| cg02030908 | THRA;NR   | 17 | 0.00327239 | 0.32576156 | 0.308720325 | 0.451876723 |
| cg03724728 | THRA;THI  | 17 | 0.00353146 | 0.31084559 | 0.32832519  | 0.4990453   |
| cg01190276 | THRB;THI  | 3  | 0.00087343 | 0.34084888 | 0.41889252  | 0.580199982 |
| cg16505204 | THRSP     | 11 | 0.00144772 | 0.12715888 | 0.133672322 | 0.327386342 |
| cg21864730 | THRSP     | 11 | 0.0024796  | 0.29557654 | 0.289062314 | 0.49565514  |
| cg13726166 | TIAF1;MY  | 17 | 0.00165724 | 0.23476155 | 0.260911942 | 0.413284701 |
| cg17730176 | TIAF1;MY  | 17 | 0.00216343 | 0.3880886  | 0.438763783 | 0.587805751 |
| cg04228709 | TIAM2;TI  | 6  | 0.00100011 | 0.33881585 | 0.462472421 | 0.579200479 |
| cg18132964 | TIAM2;TI  | 6  | 0.00337598 | 0.23230392 | 0.21721042  | 0.347633428 |
| cg06694381 | TIAM2;TI  | 6  | 0.00456818 | 0.46355944 | 0.433866795 | 0.619894917 |
| cg26934881 | TIAM2;TI  | 6  | 0.00457701 | 0.68237394 | 0.695077526 | 0.795577699 |
| cg21539594 | TIE1      | 1  | 0.00080373 | 0.3474685  | 0.423535374 | 0.57890471  |
| cg26195652 | TIE1      | 1  | 0.00219711 | 0.46614823 | 0.529811432 | 0.673983941 |
| cg15756407 | TIMM8B;   | 11 | 0.03515143 | 0.44624417 | 0.482404095 | 0.603236265 |
| cg15106744 | TIPARP    | 3  | 0.00539963 | 0.33773184 | 0.402777169 | 0.573660317 |
| cg07230792 | TJAP1;TJA | 6  | 0.00178025 | 0.38962425 | 0.389654969 | 0.561975902 |
| cg12427941 | TJAP1;TJA | 6  | 0.00602029 | 0.32213863 | 0.307638026 | 0.433712977 |
| cg25069807 | TK1       | 17 | 0.00119376 | 0.54901892 | 0.539608436 | 0.72211327  |
| cg06098276 | TK1       | 17 | 0.0023397  | 0.3891833  | 0.403144035 | 0.535930629 |
| cg03702413 | TLCD1;TL  | 17 | 0.00377297 | 0.33330084 | 0.277755974 | 0.435542355 |
| cg14199629 | TLE1      | 9  | 0.00480767 | 0.29084297 | 0.329845387 | 0.520355097 |
| cg08025415 | TLE2      | 19 | 0.01124644 | 0.2632167  | 0.258706259 | 0.407833424 |
| cg24772525 | TLK1;TLK  | 2  | 0.00630552 | 0.60503774 | 0.649643625 | 0.795131153 |
| cg02898977 | TM9SF1;T  | 14 | 0.01314425 | 0.63153439 | 0.634176962 | 0.876182171 |
| cg05679002 | TMCC1;TI  | 3  | 0.04127719 | 0.28938149 | 0.264691331 | 0.415651123 |
| cg23167246 | TMCO3     | 13 | 0.02686773 | 0.22375448 | 0.182084097 | 0.33131101  |
| cg24121069 | TMCO3     | 13 | 0.00587243 | 0.21598933 | 0.211005795 | 0.355020783 |
| cg01383440 | TMCO3     | 13 | 0.00703549 | 0.78316712 | 0.786345778 | 0.894791834 |
| cg22355895 | TMED5;TI  | 1  | 0.00223213 | 0.45659394 | 0.485655616 | 0.656231325 |

|            |          |    |            |            |             |             |
|------------|----------|----|------------|------------|-------------|-------------|
| cg02768480 | TMEM10   | 17 | 0.01039075 | 0.20551965 | 0.219280538 | 0.346176197 |
| cg10976623 | TMEM10   | 17 | 0.01342353 | 0.47917544 | 0.468096411 | 0.626448045 |
| cg11758345 | TMEM10   | 17 | 0.00143965 | 0.53549033 | 0.541728069 | 0.701657131 |
| cg03841376 | TMEM10   | 17 | 0.00590146 | 0.33015684 | 0.320057449 | 0.45600508  |
| cg09695261 | TMEM10   | 17 | 0.00134844 | 0.47381663 | 0.492202385 | 0.615489007 |
| cg21735384 | TMEM10   | 17 | 0.00243597 | 0.42798146 | 0.408464575 | 0.545920052 |
| cg21591452 | TMEM10   | 17 | 0.00207996 | 0.36507108 | 0.378493423 | 0.500345725 |
| cg22532155 | TMEM10   | 17 | 0.00152023 | 0.47255141 | 0.4645871   | 0.594623117 |
| cg06406157 | TMEM13   | 11 | 0.00385922 | 0.25536339 | 0.256102394 | 0.391140216 |
| cg06630988 | TMEM13   | 12 | 0.01148808 | 0.35067491 | 0.335415516 | 0.463876164 |
| cg15936861 | TMEM13   | 12 | 0.0235591  | 0.23478753 | 0.245769477 | 0.364728522 |
| cg07803856 | TMEM15   | 3  | 0.00113577 | 0.43779183 | 0.457519547 | 0.558676404 |
| cg00584026 | TMEM17   | 4  | 0.00457701 | 0.25184187 | 0.270908985 | 0.433281664 |
| cg03424213 | TMEM17   | 4  | 0.00510852 | 0.67322921 | 0.652433887 | 0.780873905 |
| cg12989041 | TMEM18   | 6  | 0.00143343 | 0.65763297 | 0.665939631 | 0.809605686 |
| cg01581326 | TMEM18   | 6  | 0.00418551 | 0.18112404 | 0.122368108 | 0.319968162 |
| cg18172186 | TMEM20   | 6  | 0.00551198 | 0.45802785 | 0.470705031 | 0.645944176 |
| cg03890628 | TMEM20   | 1  | 0.00499799 | 0.24154745 | 0.250776772 | 0.452903586 |
| cg00175735 | TMEM30   | 3  | 0.01891102 | 0.27618088 | 0.247932574 | 0.478411379 |
| cg18811916 | TMEM33   | 4  | 0.01236318 | 0.63054694 | 0.616053673 | 0.746662607 |
| cg08844169 | TMEM39   | 3  | 0.0482028  | 0.35090998 | 0.394340475 | 0.514508286 |
| cg13075537 | TMEM57   | 1  | 0.00178025 | 0.17176221 | 0.166744485 | 0.318583601 |
| cg07192718 | TMEM61   | 1  | 0.00756169 | 0.33884372 | 0.294822927 | 0.443650549 |
| cg21191255 | TMEM80   | 11 | 0.00133251 | 0.1375205  | 0.152350806 | 0.258100646 |
| cg12703825 | TMEM82   | 1  | 0.00472673 | 0.27930759 | 0.25565157  | 0.399646101 |
| cg17977470 | TMEM88   | 17 | 0.00628685 | 0.27828722 | 0.236237468 | 0.417596444 |
| cg14068176 | TMEM8B   | 9  | 0.00207724 | 0.63689206 | 0.687206012 | 0.798673783 |
| cg01263574 | TMEM8C   | 9  | 0.00095748 | 0.10574211 | 0.134695779 | 0.266141455 |
| cg15844374 | TMPRSS5  | 11 | 0.00788453 | 0.27446078 | 0.263736822 | 0.398259477 |
| cg18165914 | TMPRSS5  | 11 | 0.00194185 | 0.20177667 | 0.22146333  | 0.348562201 |
| cg25460340 | TMPRSS5  | 11 | 0.00124758 | 0.43713646 | 0.490514729 | 0.651907677 |
| cg05183271 | TMPRSS5  | 11 | 0.00380612 | 0.18592356 | 0.194413843 | 0.318150513 |
| cg23871994 | TMPRSS5  | 11 | 0.00101054 | 0.33358091 | 0.372719125 | 0.521230311 |
| cg23033870 | TMPRSS5  | 11 | 0.00128378 | 0.18204931 | 0.197544885 | 0.298923971 |
| cg06733903 | TMTC1    | 12 | 0.01124644 | 0.20960595 | 0.182152886 | 0.318029726 |
| cg18927181 | TMTC1    | 12 | 0.00244246 | 0.26141369 | 0.244608156 | 0.532256512 |
| cg01401465 | TMTC1    | 12 | 0.00201167 | 0.60233914 | 0.616960298 | 0.745594736 |
| cg03191794 | TMTC2    | 12 | 0.0015244  | 0.46797569 | 0.494846839 | 0.6811013   |
| cg18587137 | TNFAIP2  | 14 | 0.00730525 | 0.2894106  | 0.24881136  | 0.401304288 |
| cg18620571 | TNFAIP2  | 14 | 0.01148141 | 0.27901749 | 0.204129111 | 0.386810452 |
| cg10501093 | TNFAIP2  | 14 | 0.01303821 | 0.26318189 | 0.200579115 | 0.374386767 |
| cg08301307 | TNFAIP2  | 14 | 0.00128725 | 0.52007578 | 0.542583542 | 0.677179146 |
| cg07086380 | TNFAIP8  | 5  | 0.00277534 | 0.23628606 | 0.283587574 | 0.47635901  |
| cg02134720 | TNFRSF11 | 8  | 0.03771398 | 0.20482628 | 0.153926645 | 0.307180188 |
| cg11665613 | TNFRSF11 | 1  | 0.00252833 | 0.21428163 | 0.219260135 | 0.419728469 |
| cg08547922 | TNFRSF8  | 1  | 0.00311547 | 0.13489982 | 0.144099138 | 0.286155355 |

|            |          |    |            |            |             |             |
|------------|----------|----|------------|------------|-------------|-------------|
| cg26691200 | TNFRSF8  | 1  | 0.00154265 | 0.44587532 | 0.464843021 | 0.654994011 |
| cg00569500 | TNFRSF8  | 1  | 0.00236541 | 0.14262503 | 0.13432894  | 0.282702523 |
| cg10425291 | TNFRSF8; | 1  | 0.00094183 | 0.57507966 | 0.629272663 | 0.733815175 |
| cg07499259 | TNFRSF8; | 1  | 0.01430511 | 0.38538338 | 0.385068793 | 0.498851032 |
| cg00463840 | TNFRSF8; | 1  | 0.01372997 | 0.2491786  | 0.216305561 | 0.357185082 |
| cg15690400 | TNFRSF8; | 1  | 0.00614688 | 0.31515717 | 0.378095344 | 0.571170542 |
| cg17267493 | TNFSF12; | 17 | 0.00838913 | 0.54438402 | 0.529631213 | 0.659864171 |
| cg23321140 | TNIP1    | 5  | 0.01172466 | 0.16570165 | 0.13204702  | 0.281713747 |
| cg09813400 | TNIP1    | 5  | 0.0006736  | 0.39770837 | 0.442570764 | 0.550736645 |
| cg25737411 | TNK1     | 17 | 0.01907154 | 0.45629188 | 0.471843078 | 0.578250316 |
| cg00190795 | TNK2;TN  | 3  | 0.00158181 | 0.26861767 | 0.25435244  | 0.397668708 |
| cg20092936 | TNK2;TN  | 3  | 0.00230116 | 0.54198124 | 0.534406218 | 0.705181187 |
| cg21553700 | TNK2;TN  | 3  | 0.00221513 | 0.60108344 | 0.580360041 | 0.784001029 |
| cg08767936 | TNK2;TN  | 3  | 0.00081413 | 0.36790637 | 0.325734289 | 0.596592221 |
| cg08048178 | TNK2;TN  | 3  | 0.00236285 | 0.69515571 | 0.583715838 | 0.868110062 |
| cg19233001 | TNNT2;T  | 1  | 0.00520163 | 0.39158686 | 0.388379834 | 0.49178693  |
| cg19673237 | TNP1     | 2  | 0.01632034 | 0.34267045 | 0.411070934 | 0.516840451 |
| cg20310485 | TNP1     | 2  | 0.00337568 | 0.27102237 | 0.322035801 | 0.50646081  |
| cg18314765 | TNP1     | 2  | 0.00140274 | 0.30406028 | 0.404194712 | 0.636038698 |
| cg19384546 | TNP1     | 2  | 0.0094452  | 0.26308363 | 0.278437337 | 0.412931421 |
| cg12845678 | TNRC18   | 7  | 0.00214604 | 0.64763046 | 0.670361104 | 0.775902129 |
| cg06947694 | TNRC18   | 7  | 0.00078196 | 0.42754457 | 0.493799341 | 0.680265521 |
| cg20025824 | TNRC18   | 7  | 0.00103697 | 0.45649471 | 0.541154617 | 0.673473727 |
| cg10327399 | TNRC18   | 7  | 0.00182121 | 0.52125823 | 0.538266166 | 0.659670499 |
| cg00795125 | TNRC18   | 7  | 0.00344958 | 0.45957877 | 0.483710339 | 0.662584503 |
| cg23058673 | TNRC18   | 7  | 0.00126816 | 0.31479132 | 0.33531966  | 0.459716765 |
| cg14517056 | TNRC18   | 7  | 0.01863458 | 0.5845996  | 0.580386471 | 0.74410692  |
| cg06420129 | TNRC6A   | 16 | 0.00264473 | 0.29502226 | 0.274973708 | 0.437442505 |
| cg09029192 | TNRC6C;T | 17 | 0.00101423 | 0.52052525 | 0.518255475 | 0.641495809 |
| cg14410503 | TNS3     | 7  | 0.00519569 | 0.22611244 | 0.211891909 | 0.393598583 |
| cg13800949 | TNS3     | 7  | 0.00545658 | 0.31447305 | 0.280941066 | 0.42432143  |
| cg27525731 | TNS3     | 7  | 0.00335524 | 0.38184114 | 0.377217818 | 0.508469199 |
| cg12292947 | TNS3     | 7  | 0.00568798 | 0.25003934 | 0.215445378 | 0.391246878 |
| cg24661184 | TNS3     | 7  | 0.00471011 | 0.37212128 | 0.468494024 | 0.575281439 |
| cg03958512 | TNS3     | 7  | 0.00068904 | 0.37751572 | 0.468055091 | 0.74787922  |
| cg20782724 | TNS3     | 7  | 0.00067897 | 0.51365246 | 0.595184843 | 0.746276165 |
| cg27275374 | TNS3     | 7  | 0.00132175 | 0.28750229 | 0.344773578 | 0.525221748 |
| cg06871974 | TNS3     | 7  | 0.03552968 | 0.45661896 | 0.439839449 | 0.560985454 |
| cg25854703 | TNXB     | 6  | 0.00354346 | 0.54523243 | 0.492602055 | 0.698775341 |
| cg03822479 | TNXB     | 6  | 0.00450197 | 0.5845237  | 0.575100728 | 0.728919258 |
| cg04389484 | TNXB     | 6  | 0.02231558 | 0.65049431 | 0.624468643 | 0.752422852 |
| cg14924781 | TNXB     | 6  | 0.00796332 | 0.33915786 | 0.354622425 | 0.567205474 |
| cg21042276 | TNXB     | 6  | 0.00135325 | 0.12848211 | 0.138014407 | 0.238494501 |
| cg14669361 | TNXB     | 6  | 0.00157286 | 0.15119064 | 0.167517958 | 0.328005784 |
| cg23462632 | TNXB     | 6  | 0.00626821 | 0.18360106 | 0.183466984 | 0.285316479 |
| cg13798746 | TNXB     | 6  | 0.00208745 | 0.15535211 | 0.14862353  | 0.304465555 |



|            |          |    |            |            |             |             |
|------------|----------|----|------------|------------|-------------|-------------|
| cg15318957 | TNXB     | 6  | 0.00524148 | 0.11291052 | 0.110259907 | 0.252063324 |
| cg08660959 | TNXB     | 6  | 0.00228672 | 0.20516764 | 0.246214199 | 0.367526017 |
| cg07485305 | TNXB     | 6  | 0.00714351 | 0.13199851 | 0.122224596 | 0.23764665  |
| cg20407792 | TNXB     | 6  | 0.00218799 | 0.14702968 | 0.144549943 | 0.348045235 |
| cg23186098 | TNXB     | 6  | 0.00549982 | 0.25865704 | 0.264266939 | 0.423940237 |
| cg19609334 | TNXB     | 6  | 0.00159949 | 0.44708108 | 0.450375234 | 0.602909941 |
| cg02151997 | TNXB     | 6  | 0.00414201 | 0.33556747 | 0.387534277 | 0.584825747 |
| cg04757901 | TNXB     | 6  | 0.00276855 | 0.27660517 | 0.28404036  | 0.527241489 |
| cg03130418 | TNXB     | 6  | 0.01024014 | 0.30945687 | 0.337642716 | 0.4503544   |
| cg14196170 | TNXB     | 6  | 0.00614688 | 0.3620051  | 0.366758567 | 0.519460337 |
| cg02989255 | TNXB     | 6  | 0.01456284 | 0.32082497 | 0.325665287 | 0.4359032   |
| cg26266427 | TNXB     | 6  | 0.00615357 | 0.33125241 | 0.380509021 | 0.496480626 |
| cg10365886 | TNXB     | 6  | 0.00290119 | 0.36710914 | 0.449061511 | 0.630460872 |
| cg14188106 | TNXB     | 6  | 0.00183657 | 0.25984045 | 0.330853752 | 0.480752462 |
| cg07524919 | TNXB     | 6  | 0.02203296 | 0.29882231 | 0.362878897 | 0.480790738 |
| cg27387193 | TNXB     | 6  | 0.00527609 | 0.30364106 | 0.382148222 | 0.483410229 |
| cg19267551 | TNXB     | 6  | 0.00269197 | 0.24834584 | 0.32642005  | 0.440449004 |
| cg01992382 | TNXB     | 6  | 0.00170239 | 0.17331522 | 0.23767608  | 0.381102444 |
| cg16834823 | TNXB     | 6  | 0.00073265 | 0.20057536 | 0.307196899 | 0.491964581 |
| cg10923662 | TNXB     | 6  | 0.00158407 | 0.16093788 | 0.24373314  | 0.383810801 |
| cg24882324 | TNXB     | 6  | 0.00065949 | 0.16189808 | 0.324811608 | 0.451875183 |
| cg15196197 | TNXB     | 6  | 0.00073265 | 0.14239092 | 0.233237265 | 0.378481151 |
| cg12694372 | TNXB     | 6  | 0.00081599 | 0.22240251 | 0.369165807 | 0.524327319 |
| cg15265085 | TNXB     | 6  | 0.00073118 | 0.26242565 | 0.44538525  | 0.576045154 |
| cg08650890 | TNXB     | 6  | 0.00071094 | 0.25111109 | 0.371493407 | 0.492752198 |
| cg21642103 | TNXB     | 6  | 0.00071094 | 0.21671254 | 0.281217124 | 0.390220616 |
| cg13698691 | TNXB     | 6  | 0.00065949 | 0.1757775  | 0.269883786 | 0.370953655 |
| cg01485117 | TNXB     | 6  | 0.00073547 | 0.20092235 | 0.286521547 | 0.406236529 |
| cg15745284 | TNXB     | 6  | 0.00113577 | 0.46136317 | 0.525609338 | 0.654334017 |
| cg00979704 | TNXB     | 6  | 0.00600791 | 0.17502453 | 0.133483279 | 0.286782159 |
| cg13739666 | TNXB;TN) | 6  | 0.00467005 | 0.36626252 | 0.344553697 | 0.481752062 |
| cg26537323 | TNXB;TN) | 6  | 0.00575836 | 0.3139684  | 0.28393119  | 0.414236775 |
| cg26779330 | TOLLIP   | 11 | 0.00947108 | 0.27108208 | 0.291251893 | 0.40750861  |
| cg23041020 | TOLLIP   | 11 | 0.02835259 | 0.36301162 | 0.344194978 | 0.474484852 |
| cg17092096 | TOLLIP   | 11 | 0.00436875 | 0.33482161 | 0.28791765  | 0.435606641 |
| cg03466237 | TOLLIP   | 11 | 0.00925638 | 0.44670839 | 0.427338481 | 0.642613791 |
| cg10696445 | TOLLIP   | 11 | 0.00207762 | 0.27239234 | 0.273659594 | 0.406820806 |
| cg05311626 | TOLLIP   | 11 | 0.00163336 | 0.14677262 | 0.14702831  | 0.355658015 |
| cg03044471 | TOLLIP   | 11 | 0.00450197 | 0.32944558 | 0.314368495 | 0.466788956 |
| cg23178186 | TOLLIP   | 11 | 0.00948869 | 0.61515607 | 0.598884902 | 0.730028897 |
| cg24186398 | TOLLIP   | 11 | 0.00748137 | 0.43943784 | 0.43986894  | 0.638396938 |
| cg22050611 | TOLLIP   | 11 | 0.00166045 | 0.33685399 | 0.298702283 | 0.534281157 |
| cg12601909 | TOLLIP   | 11 | 0.00137973 | 0.61822193 | 0.629055408 | 0.749329454 |
| cg17591574 | TOR3A    | 1  | 0.0011104  | 0.16902537 | 0.185038257 | 0.376235691 |
| cg13962286 | TP53AIP1 | 11 | 0.03173228 | 0.17149785 | 0.151696416 | 0.282042942 |
| cg03760518 | TP73;TP7 | 1  | 0.00380283 | 0.30003799 | 0.301476414 | 0.40812866  |

|            |          |    |            |            |             |             |
|------------|----------|----|------------|------------|-------------|-------------|
| cg06624991 | TPCN2    | 11 | 0.00217555 | 0.62058456 | 0.634540116 | 0.752035821 |
| cg10256045 | TPCN2    | 11 | 0.00444533 | 0.23784645 | 0.203869186 | 0.461460989 |
| cg18053228 | TPCN2    | 11 | 0.0097133  | 0.19764683 | 0.136626095 | 0.302550805 |
| cg08847919 | TPCN2    | 11 | 0.00565706 | 0.53643556 | 0.502004736 | 0.667289309 |
| cg08192033 | TPD52L1; | 6  | 0.02899242 | 0.26737283 | 0.23850348  | 0.381139939 |
| cg02807882 | TPD52L1; | 6  | 0.01589679 | 0.23178957 | 0.216546659 | 0.344876154 |
| cg12017635 | TPH2     | 12 | 0.02828378 | 0.1352745  | 0.115757531 | 0.236969735 |
| cg27174787 | TPM4     | 19 | 0.0219159  | 0.19344943 | 0.167012971 | 0.297783543 |
| cg22546122 | TPM4     | 19 | 0.01093903 | 0.16912197 | 0.136638503 | 0.276144865 |
| cg01950495 | TPPP     | 5  | 0.00146177 | 0.28331512 | 0.26284605  | 0.439928646 |
| cg03655389 | TPPP     | 5  | 0.01256322 | 0.73880039 | 0.777209137 | 0.884930425 |
| cg18389810 | TPPP2    | 14 | 0.00160583 | 0.16627629 | 0.197271393 | 0.344538432 |
| cg13597809 | TRAF2    | 9  | 0.00317466 | 0.32344817 | 0.317745417 | 0.466417185 |
| cg00827663 | TRAF2    | 9  | 0.00810401 | 0.67048691 | 0.654377848 | 0.782666594 |
| cg18372196 | TRAM2    | 6  | 0.01657372 | 0.4089394  | 0.364139925 | 0.525939885 |
| cg11723904 | TRAP1    | 16 | 0.00446647 | 0.47265723 | 0.490056759 | 0.660177464 |
| cg18219994 | TRAPPC9; | 8  | 0.00108661 | 0.33983385 | 0.407482276 | 0.578405362 |
| cg24317069 | TRAPPC9; | 8  | 0.00085355 | 0.62432842 | 0.651134876 | 0.75689783  |
| cg03282105 | TRAPPC9; | 8  | 0.00149058 | 0.26695218 | 0.28492409  | 0.443720263 |
| cg02528189 | TRAPPC9; | 8  | 0.00083228 | 0.27757119 | 0.31927577  | 0.444933653 |
| cg17290943 | TRAPPC9; | 8  | 0.00154265 | 0.55423154 | 0.586242616 | 0.714562945 |
| cg08504029 | TRAPPC9; | 8  | 0.00189637 | 0.31734101 | 0.358350039 | 0.48743349  |
| cg24388061 | TRAPPC9; | 8  | 0.00702537 | 0.21784356 | 0.231974264 | 0.343610155 |
| cg20946943 | TRAPPC9; | 8  | 0.00944201 | 0.3278417  | 0.330145319 | 0.543568632 |
| cg11256152 | TRAPPC9; | 8  | 0.03739058 | 0.47178738 | 0.496423877 | 0.616287421 |
| cg14023589 | TRHDE    | 12 | 0.01198766 | 0.70691901 | 0.696850132 | 0.816552543 |
| cg08322448 | TRIM2;TR | 4  | 0.00073118 | 0.52659293 | 0.575779256 | 0.735746111 |
| cg00787996 | TRIM31   | 6  | 0.00911882 | 0.5425209  | 0.546252977 | 0.693681944 |
| cg27351624 | TRIM31   | 6  | 0.0008774  | 0.42380171 | 0.478750514 | 0.6508889   |
| cg22262055 | TRIM38   | 6  | 0.03829642 | 0.51133121 | 0.462454067 | 0.617221116 |
| cg03306027 | TRIM62   | 1  | 0.00134295 | 0.22436086 | 0.233140629 | 0.366528028 |
| cg12077698 | TRIM62   | 1  | 0.00094876 | 0.36839512 | 0.37768394  | 0.626179603 |
| cg26780705 | TRIM65   | 17 | 0.00555868 | 0.17287217 | 0.166326852 | 0.283533668 |
| cg23367683 | TRIM7;TR | 5  | 0.02673403 | 0.52113283 | 0.525065123 | 0.64957915  |
| cg00608540 | TRIM7;TR | 5  | 0.000777   | 0.34197914 | 0.364929445 | 0.502228881 |
| cg10179300 | TRIO     | 5  | 0.00129968 | 0.57193422 | 0.578762414 | 0.758479926 |
| cg26689441 | TRIO     | 5  | 0.01729366 | 0.47141978 | 0.483180722 | 0.600675683 |
| cg22126499 | TRMT2A;  | 22 | 0.00204405 | 0.33268707 | 0.323419107 | 0.458597738 |
| cg00530568 | TRPC7;TR | 5  | 0.00299125 | 0.42024792 | 0.389837742 | 0.563235814 |
| cg03716852 | TRPM4    | 19 | 0.00248015 | 0.2322856  | 0.209882204 | 0.367717211 |
| cg18225577 | TRPM4    | 19 | 0.00133251 | 0.18720128 | 0.152067843 | 0.377591582 |
| cg14220181 | TRPM8    | 2  | 0.00482325 | 0.25891802 | 0.211142643 | 0.36117369  |
| cg26358374 | TRPV4;TR | 12 | 0.00113577 | 0.12723513 | 0.143362126 | 0.297361049 |
| cg12765716 | TRPV4;TR | 12 | 0.0010753  | 0.12357209 | 0.132705002 | 0.234944821 |
| cg04717595 | TRPV4;TR | 12 | 0.00091163 | 0.1160977  | 0.142654141 | 0.257950571 |
| cg07675656 | TSC2;TSC | 16 | 0.00155292 | 0.24181814 | 0.257656888 | 0.417402784 |

|            |           |    |            |            |             |             |
|------------|-----------|----|------------|------------|-------------|-------------|
| cg02364279 | TSC2;TSC  | 16 | 0.00157567 | 0.38949013 | 0.407147049 | 0.534810244 |
| cg08936056 | TSC2;TSC  | 16 | 0.00544367 | 0.31874606 | 0.306256496 | 0.468466276 |
| cg01769813 | TSC2;TSC  | 16 | 0.00602029 | 0.36556421 | 0.336822865 | 0.515982146 |
| cg22497575 | TSC22D1   | 13 | 0.00481061 | 0.15368395 | 0.15595867  | 0.314228363 |
| cg03097389 | TSC22D1;  | 13 | 0.00866099 | 0.13980604 | 0.124180719 | 0.289433777 |
| cg17600231 | TSC22D1;  | 13 | 0.00840516 | 0.09550183 | 0.093064231 | 0.200994771 |
| cg25247409 | TSNARE1   | 8  | 0.021196   | 0.22514496 | 0.190769039 | 0.326599471 |
| cg09663584 | TSPAN3;T  | 15 | 0.00174311 | 0.70277365 | 0.743963742 | 0.848997166 |
| cg13071185 | TSPAN4;T  | 11 | 0.00679946 | 0.32278579 | 0.301530991 | 0.434209067 |
| cg13614606 | TSPAN4;T  | 11 | 0.00186737 | 0.53731899 | 0.532677783 | 0.692864338 |
| cg17998346 | TSPAN4;T  | 11 | 0.00097618 | 0.52045733 | 0.537090639 | 0.646361399 |
| cg09296942 | TSPAN5    | 4  | 0.01506509 | 0.38063079 | 0.337133817 | 0.494837386 |
| cg23246886 | TSPAN5    | 4  | 0.00221105 | 0.63061836 | 0.592263855 | 0.750258526 |
| cg00615469 | TSPAN5    | 4  | 0.00803433 | 0.20067976 | 0.194612316 | 0.323585158 |
| cg20639398 | TSPAN9;T  | 12 | 0.0026964  | 0.60777808 | 0.616325345 | 0.729732629 |
| cg25672027 | TSPO;TSP  | 22 | 0.00078196 | 0.29894394 | 0.362249186 | 0.548220859 |
| cg06766636 | TSPYL1;T  | 6  | 0.03110358 | 0.27310999 | 0.28984864  | 0.394940206 |
| cg03646994 | TSSC1     | 2  | 0.03352901 | 0.38795167 | 0.369213431 | 0.51671231  |
| cg03025986 | TSSC1     | 2  | 0.00336646 | 0.56415173 | 0.635427628 | 0.735618263 |
| cg19536922 | TSSC1     | 2  | 0.00092849 | 0.67105988 | 0.705051534 | 0.819702169 |
| cg04951371 | TSSC1     | 2  | 0.00249468 | 0.26474096 | 0.242430628 | 0.390753334 |
| cg11685249 | TSSK1B;M  | 5  | 0.00140443 | 0.39232635 | 0.395766443 | 0.569400451 |
| cg25714774 | TTC15     | 2  | 0.00220808 | 0.68327645 | 0.642427264 | 0.788059747 |
| cg12392225 | TTC15     | 2  | 0.00209654 | 0.10982347 | 0.093297914 | 0.305576559 |
| cg27639897 | TTC15     | 2  | 0.00215692 | 0.12866421 | 0.141546704 | 0.347677009 |
| cg25113123 | TTC15     | 2  | 0.00279704 | 0.54849077 | 0.543284496 | 0.670214445 |
| cg19022697 | TTC22     | 1  | 0.00399104 | 0.23952702 | 0.183546469 | 0.341426802 |
| cg15645660 | TTC22     | 1  | 0.01151007 | 0.30880173 | 0.243422773 | 0.413622084 |
| cg05401069 | TTC39C    | 18 | 0.01842724 | 0.20035493 | 0.141203587 | 0.332559157 |
| cg18719665 | TTC39C    | 18 | 0.01263862 | 0.14846309 | 0.10799271  | 0.273016052 |
| cg11222440 | TTC7A     | 2  | 0.00806542 | 0.35875129 | 0.354529595 | 0.565977966 |
| cg04437845 | TTC7A     | 2  | 0.00301844 | 0.55478137 | 0.523951304 | 0.667364778 |
| cg23870587 | TTC7B     | 14 | 0.03686125 | 0.32462927 | 0.343326917 | 0.445815136 |
| cg10062874 | TTC7B     | 14 | 0.0120439  | 0.22170837 | 0.220320926 | 0.416008761 |
| cg04458567 | TTL       | 2  | 0.00500442 | 0.37927107 | 0.458780115 | 0.606919636 |
| cg05545910 | TTLL1;TTI | 22 | 0.00093925 | 0.37440594 | 0.41728725  | 0.616607313 |
| cg03959147 | TTLL7     | 1  | 0.02817047 | 0.62436874 | 0.666817871 | 0.772428185 |
| cg10087754 | TTYH3     | 7  | 0.03722047 | 0.26234907 | 0.23231435  | 0.367620588 |
| cg22788953 | TTYH3     | 7  | 0.00768774 | 0.27134945 | 0.275451844 | 0.382239948 |
| cg05519002 | TUB;TUB   | 11 | 0.00115308 | 0.28479109 | 0.302399774 | 0.48386278  |
| cg10133610 | TUBB2B    | 6  | 0.01641391 | 0.43555485 | 0.48690848  | 0.625196532 |
| cg10724940 | TUBGCP6   | 22 | 0.0048909  | 0.41512094 | 0.408460467 | 0.525613993 |
| cg00696711 | TULP4;TL  | 6  | 0.02367946 | 0.78661552 | 0.738386801 | 0.888460641 |
| cg03467567 | TULP4;TL  | 6  | 0.01263862 | 0.59874528 | 0.549570474 | 0.755399759 |
| cg07705604 | TULP4;TL  | 6  | 0.00147208 | 0.43750342 | 0.44895755  | 0.610162108 |
| cg13068216 | TULP4;TL  | 6  | 0.00070134 | 0.21670728 | 0.278336671 | 0.575340211 |

|            |          |    |            |            |             |             |
|------------|----------|----|------------|------------|-------------|-------------|
| cg12601856 | TULP4;TU | 6  | 0.00074016 | 0.2715312  | 0.315003628 | 0.643671075 |
| cg18978680 | TULP4;TU | 6  | 0.00107573 | 0.23575003 | 0.251314934 | 0.569411303 |
| cg19987965 | TULP4;TU | 6  | 0.00113577 | 0.30002409 | 0.373187181 | 0.673621233 |
| cg07165851 | TULP4;TU | 6  | 0.00280852 | 0.15723126 | 0.156227749 | 0.278676881 |
| cg23816737 | TULP4;TU | 6  | 0.00230768 | 0.17329653 | 0.213941666 | 0.398825987 |
| cg02060443 | TULP4;TU | 6  | 0.00102765 | 0.47508283 | 0.518430919 | 0.772210441 |
| cg14755699 | TWIST2   | 2  | 0.04265641 | 0.26994805 | 0.314586976 | 0.460276325 |
| cg22986947 | TXNDC5;T | 6  | 0.00374355 | 0.49923369 | 0.495667066 | 0.610708686 |
| cg21480173 | TYK2     | 19 | 0.00534171 | 0.65476914 | 0.683914689 | 0.794107975 |
| cg23306063 | TYK2     | 19 | 0.00890116 | 0.31843803 | 0.291389145 | 0.426518394 |
| cg24509225 | UBAC2;U  | 13 | 0.00177922 | 0.23447447 | 0.245384825 | 0.437647586 |
| cg20555462 | UBASH3B  | 11 | 0.03053716 | 0.45459772 | 0.48091802  | 0.610743797 |
| cg23081194 | UBE2G2;U | 21 | 0.04568556 | 0.6636732  | 0.701904916 | 0.815140348 |
| cg27031484 | UBE2H;U  | 7  | 0.0261269  | 0.25982429 | 0.278476697 | 0.430670768 |
| cg10628201 | UBE2L3;U | 22 | 0.01109894 | 0.25185563 | 0.20841805  | 0.4218088   |
| cg17957183 | UBE2N    | 12 | 0.02445578 | 0.39617978 | 0.436175516 | 0.54933073  |
| cg12547839 | UBE2O    | 17 | 0.00190848 | 0.15770438 | 0.156260978 | 0.275492527 |
| cg02390515 | UBE4B;U  | 1  | 0.00429038 | 0.49933462 | 0.487674463 | 0.636212149 |
| cg04440724 | UBN1;UB  | 16 | 0.0062669  | 0.79338172 | 0.792572645 | 0.910144199 |
| cg22840650 | UBTD1    | 10 | 0.00357848 | 0.14245219 | 0.135509224 | 0.328780843 |
| cg08499158 | UBTF;UB  | 17 | 0.00381594 | 0.41661422 | 0.421857327 | 0.591487616 |
| cg10308265 | UBTF;UB  | 17 | 0.00341796 | 0.33477582 | 0.294053509 | 0.452053516 |
| cg10402321 | UBXN11;U | 1  | 0.00186737 | 0.2810318  | 0.33078103  | 0.46335739  |
| cg21934504 | UBXN6;U  | 19 | 0.02510464 | 0.40189324 | 0.363473241 | 0.512549977 |
| cg01637548 | UCKL1;M  | 20 | 0.00301844 | 0.17757143 | 0.18530083  | 0.289914213 |
| cg27243297 | UCMA     | 10 | 0.00838112 | 0.22596694 | 0.207221123 | 0.366460531 |
| cg15671083 | UCN3     | 10 | 0.01511943 | 0.38710647 | 0.423199802 | 0.542765641 |
| cg00621899 | UFSP1;UF | 7  | 0.00503527 | 0.31357062 | 0.282139207 | 0.425220033 |
| cg17028658 | UFSP2;UF | 4  | 0.0102761  | 0.50278901 | 0.510380063 | 0.693256545 |
| cg19931529 | UGP2;UG  | 2  | 0.00815824 | 0.14023118 | 0.144195703 | 0.279976873 |
| cg07823755 | UGT1A10  | 2  | 0.0103127  | 0.58996171 | 0.615261047 | 0.724487666 |
| cg22609233 | UGT8     | 4  | 0.02002229 | 0.32925987 | 0.393071092 | 0.520608377 |
| cg03240473 | UMODL1   | 21 | 0.00359124 | 0.46569042 | 0.467360958 | 0.642972863 |
| cg14380013 | UNC119B  | 12 | 0.00376892 | 0.20599159 | 0.227870358 | 0.365373882 |
| cg26716839 | UNC119B  | 12 | 0.02289835 | 0.44218254 | 0.464563527 | 0.595250253 |
| cg12407791 | UNC13D   | 17 | 0.00065949 | 0.29142782 | 0.363285207 | 0.485771657 |
| cg23470227 | UNC13D   | 17 | 0.00107905 | 0.53804833 | 0.513228096 | 0.65583454  |
| cg16759416 | UNC5B    | 10 | 0.01406453 | 0.4971562  | 0.468953242 | 0.616245173 |
| cg16490191 | UNKL     | 16 | 0.01496968 | 0.69871718 | 0.691573027 | 0.803844253 |
| cg01682111 | UNKL     | 16 | 0.00377206 | 0.09777091 | 0.095789374 | 0.201285561 |
| cg03622431 | UOX;DNA  | 1  | 0.01887509 | 0.41900166 | 0.396205641 | 0.536140489 |
| cg07151747 | UPP2;UPI | 2  | 0.00100059 | 0.30600418 | 0.341144104 | 0.495421329 |
| cg17710536 | URGCP;U  | 7  | 0.00664725 | 0.41649952 | 0.396381257 | 0.583312427 |
| cg19985030 | USH1G    | 17 | 0.00106261 | 0.43900817 | 0.466617094 | 0.640982959 |
| cg04431002 | USP10    | 16 | 0.0026958  | 0.30561287 | 0.346859309 | 0.530193368 |
| cg07795346 | USP10    | 16 | 0.00200001 | 0.15273007 | 0.116581239 | 0.28755982  |

|            |          |    |            |            |             |             |
|------------|----------|----|------------|------------|-------------|-------------|
| cg01019355 | USP12    | 13 | 0.00273943 | 0.25469319 | 0.236784248 | 0.401058695 |
| cg02387639 | USP13    | 3  | 0.00606409 | 0.32560932 | 0.354729087 | 0.554754861 |
| cg02756502 | USP20;US | 9  | 0.00362881 | 0.19720631 | 0.206266447 | 0.348204178 |
| cg24427271 | USP36    | 17 | 0.00330705 | 0.39841311 | 0.433906366 | 0.643391238 |
| cg23496516 | USP36    | 17 | 0.00186737 | 0.35268047 | 0.352197938 | 0.508422917 |
| cg04491365 | USP38    | 4  | 0.01713917 | 0.61993697 | 0.665958281 | 0.778689404 |
| cg05638347 | USP42    | 7  | 0.00177922 | 0.71971335 | 0.76514155  | 0.867734962 |
| cg22849526 | USP42    | 7  | 0.00798815 | 0.66457683 | 0.650836541 | 0.779191803 |
| cg10752190 | USP43    | 17 | 0.00575746 | 0.3221302  | 0.330732197 | 0.469251818 |
| cg10098221 | USP46;US | 4  | 0.00213077 | 0.15734502 | 0.161534339 | 0.315726747 |
| cg27181013 | USP5;USF | 12 | 0.01838071 | 0.30959183 | 0.292657755 | 0.426256991 |
| cg05265574 | USP6NL   | 10 | 0.00579337 | 0.16892905 | 0.210865167 | 0.342360932 |
| cg06302998 | USP6NL;L | 10 | 0.0025513  | 0.15812782 | 0.144948667 | 0.301556713 |
| cg10853431 | USP6NL;L | 10 | 0.00263648 | 0.35944686 | 0.353512815 | 0.561760512 |
| cg06528737 | USP6NL;L | 10 | 0.00174311 | 0.42981977 | 0.48389023  | 0.647634767 |
| cg18766900 | USP6NL;L | 10 | 0.00284268 | 0.30512256 | 0.351734816 | 0.533821106 |
| cg04444027 | USP7     | 16 | 0.00753569 | 0.18734248 | 0.185533821 | 0.339977781 |
| cg01601926 | USP7     | 16 | 0.01191142 | 0.28665784 | 0.270932702 | 0.397396092 |
| cg18800739 | UTRN     | 6  | 0.00569156 | 0.24456937 | 0.24983599  | 0.378175469 |
| cg02475675 | UTRN     | 6  | 0.01863458 | 0.65757927 | 0.648411945 | 0.769393662 |
| cg20625138 | UTS2;UTS | 1  | 0.0009078  | 0.24341561 | 0.338124709 | 0.526573373 |
| cg07783183 | UVRAG    | 11 | 0.0012785  | 0.60812428 | 0.573872105 | 0.794222931 |
| cg14321837 | UXS1     | 2  | 0.01561358 | 0.47548656 | 0.498075094 | 0.625261441 |
| cg10262662 | VAC14    | 16 | 0.00093183 | 0.40656657 | 0.424890205 | 0.581309505 |
| cg05704955 | VAC14    | 16 | 0.00294138 | 0.15506909 | 0.160798511 | 0.271236108 |
| cg08201451 | VAC14    | 16 | 0.00358002 | 0.40433533 | 0.408580451 | 0.593586445 |
| cg10216848 | VAC14    | 16 | 0.00552206 | 0.52825026 | 0.436647092 | 0.665020444 |
| cg02149965 | VARS2;V/ | 6  | 0.02568798 | 0.3172493  | 0.296963212 | 0.420358426 |
| cg17428922 | VARS2;V/ | 6  | 0.00594682 | 0.4187706  | 0.451519584 | 0.581521568 |
| cg15673491 | VARS2;V/ | 6  | 0.00670817 | 0.44091734 | 0.432103712 | 0.566103002 |
| cg26457890 | VASN;CO  | 16 | 0.00109306 | 0.15643929 | 0.147510989 | 0.351887352 |
| cg01851968 | VASN;CO  | 16 | 0.00156869 | 0.38855845 | 0.402774714 | 0.529206463 |
| cg13836412 | VAV2;VA\ | 9  | 0.00521564 | 0.46263259 | 0.460666728 | 0.573319376 |
| cg14286025 | VAV2;VA\ | 9  | 0.00073118 | 0.20045684 | 0.244783304 | 0.390303442 |
| cg13954067 | VAV2;VA\ | 9  | 0.00083228 | 0.09010415 | 0.109248499 | 0.302605536 |
| cg13829680 | VAV2;VA\ | 9  | 0.0023323  | 0.57614923 | 0.595086042 | 0.755752406 |
| cg00788204 | VAV2;VA\ | 9  | 0.00405622 | 0.63549661 | 0.639550372 | 0.775770845 |
| cg14308466 | VAV2;VA\ | 9  | 0.00745657 | 0.17905658 | 0.186506905 | 0.306852984 |
| cg13424940 | VAV2;VA\ | 9  | 0.01688348 | 0.22116106 | 0.197966453 | 0.347440042 |
| cg04223006 | VCAN;VC  | 5  | 0.00168532 | 0.17552392 | 0.209085526 | 0.353927939 |
| cg16492597 | VDAC1    | 5  | 0.00112793 | 0.12591483 | 0.135980795 | 0.274905781 |
| cg25219939 | VDR;VDR  | 12 | 0.00405622 | 0.48849149 | 0.482732935 | 0.675389664 |
| cg12279019 | VEGFA;VI | 6  | 0.00714351 | 0.31704914 | 0.309684469 | 0.495576323 |
| cg16907527 | VEGFA;VI | 6  | 0.00408296 | 0.59789996 | 0.58077853  | 0.729408614 |
| cg25547939 | VEGFB;DI | 11 | 0.0115311  | 0.36863287 | 0.337952354 | 0.472027701 |
| cg22658311 | VEGFC    | 4  | 0.00066232 | 0.30637737 | 0.399455297 | 0.552896626 |

|            |          |    |            |            |             |             |
|------------|----------|----|------------|------------|-------------|-------------|
| cg01589054 | VGLL4    | 3  | 0.04187319 | 0.56022783 | 0.545076953 | 0.693078324 |
| cg26015019 | VGLL4;VC | 3  | 0.01613093 | 0.4710436  | 0.502075522 | 0.618293663 |
| cg17553677 | VGLL4;VC | 3  | 0.00462871 | 0.17339592 | 0.175794757 | 0.308822259 |
| cg22841079 | VGLL4;VC | 3  | 0.01160447 | 0.21870482 | 0.194096306 | 0.378563455 |
| cg03182000 | VGLL4;VC | 3  | 0.00315788 | 0.61507956 | 0.601653584 | 0.726293568 |
| cg08815359 | VGLL4;VC | 3  | 0.00076471 | 0.60250107 | 0.637938739 | 0.806714131 |
| cg23193320 | VGLL4;VC | 3  | 0.00883762 | 0.49272594 | 0.467427591 | 0.612175112 |
| cg00510331 | VGLL4;VC | 3  | 0.01236318 | 0.48263441 | 0.441973462 | 0.603810559 |
| cg19880465 | VILL     | 3  | 0.00576931 | 0.2211934  | 0.178963765 | 0.374355814 |
| cg13336326 | VIPR2    | 7  | 0.02199155 | 0.38241874 | 0.47188292  | 0.630590641 |
| cg14974056 | VIT      | 2  | 0.01776628 | 0.5606209  | 0.559010726 | 0.680896952 |
| cg17117823 | VPS13B;V | 8  | 0.01580766 | 0.53456892 | 0.524821745 | 0.684685051 |
| cg18576301 | VPS13B;V | 8  | 0.00073378 | 0.39129543 | 0.466079074 | 0.630583846 |
| cg18224970 | VPS13B;V | 8  | 0.00708294 | 0.38460047 | 0.423799606 | 0.550882241 |
| cg07139350 | VPS13D;V | 1  | 0.0315497  | 0.18877201 | 0.128907474 | 0.296513678 |
| cg26228280 | VPS13D;V | 1  | 0.01236318 | 0.31597404 | 0.264807887 | 0.462633321 |
| cg24692310 | VPS37C   | 11 | 0.00230116 | 0.37683655 | 0.363316734 | 0.486596203 |
| cg15105901 | VPS4A    | 16 | 0.00757332 | 0.68799135 | 0.694009046 | 0.80254323  |
| cg23510109 | VPS53;VP | 17 | 0.00426883 | 0.46430569 | 0.385286225 | 0.606978449 |
| cg09668627 | VWA1;VV  | 1  | 0.01100502 | 0.19250292 | 0.201367813 | 0.304959097 |
| cg15104126 | VWF      | 12 | 0.02172582 | 0.47435482 | 0.502420186 | 0.620644806 |
| cg20837463 | VWF      | 12 | 0.0048146  | 0.1558543  | 0.129512338 | 0.271577655 |
| cg10775733 | WASF1;W  | 6  | 0.03752792 | 0.69956752 | 0.685917731 | 0.806686813 |
| cg09537568 | WDFY3;W  | 4  | 0.00195    | 0.34132587 | 0.441916436 | 0.586592976 |
| cg24789587 | WDR18    | 19 | 0.01045915 | 0.63290017 | 0.650061518 | 0.762680856 |
| cg01755336 | WDR20;V  | 14 | 0.01126796 | 0.33884222 | 0.303438366 | 0.456304543 |
| cg09980114 | WDR20;V  | 14 | 0.00168532 | 0.62864274 | 0.671180194 | 0.772537439 |
| cg04858090 | WDR27    | 6  | 0.04963055 | 0.72401139 | 0.646679749 | 0.824023112 |
| cg06630010 | WDR37    | 10 | 0.00896145 | 0.66079488 | 0.668606984 | 0.771024949 |
| cg13504933 | WDR51A;  | 3  | 0.01488167 | 0.46035711 | 0.454993484 | 0.595020663 |
| cg07822618 | WDR60    | 7  | 0.00154265 | 0.25114438 | 0.272932499 | 0.471146103 |
| cg01302119 | WDR60    | 7  | 0.00159903 | 0.40376061 | 0.421096401 | 0.531559632 |
| cg08933790 | WFIKKN1  | 16 | 0.01109894 | 0.70370097 | 0.718646919 | 0.834939516 |
| cg08674236 | WHSC1;V  | 4  | 0.0336255  | 0.42037574 | 0.440124885 | 0.547714747 |
| cg00248861 | WHSC2    | 4  | 0.01045915 | 0.37323894 | 0.407225497 | 0.543322044 |
| cg04996238 | WHSC2    | 4  | 0.0235712  | 0.30214216 | 0.253149158 | 0.407585217 |
| cg18690368 | WIPF3    | 7  | 0.01100502 | 0.23815767 | 0.215808798 | 0.382859298 |
| cg26988194 | WIPI1    | 17 | 0.00315582 | 0.51044737 | 0.52740715  | 0.663531207 |
| cg17667625 | WISP1;W  | 8  | 0.01317683 | 0.14043299 | 0.120469549 | 0.250565797 |
| cg19804071 | WISP3;W  | 6  | 0.00642271 | 0.26878773 | 0.2903974   | 0.40816495  |
| cg14723977 | WIZ      | 19 | 0.00372084 | 0.33810811 | 0.306047984 | 0.491745401 |
| cg13481840 | WNK2     | 9  | 0.00628685 | 0.37340095 | 0.376511724 | 0.559691662 |
| cg02169981 | WNT11    | 11 | 0.00769304 | 0.51692099 | 0.501549924 | 0.661845741 |
| cg02298472 | WNT5A    | 3  | 0.00066232 | 0.33074447 | 0.44524463  | 0.603419626 |
| cg01777121 | WNT5A    | 3  | 0.00065949 | 0.20429598 | 0.287715895 | 0.429041873 |
| cg18562578 | WNT5A    | 3  | 0.00092643 | 0.25321853 | 0.321381184 | 0.44575571  |

|            |          |    |            |            |             |             |
|------------|----------|----|------------|------------|-------------|-------------|
| cg24216596 | WNT5A    | 3  | 0.00073118 | 0.35020289 | 0.42042661  | 0.537744713 |
| cg22264616 | WT1;WT1  | 11 | 0.03169761 | 0.23702975 | 0.240087896 | 0.346812112 |
| cg21038780 | WWC1;W   | 5  | 0.01482933 | 0.19957257 | 0.20167584  | 0.36701098  |
| cg03119442 | WWOX     | 16 | 0.00325993 | 0.74615213 | 0.710158605 | 0.850116047 |
| cg26990527 | WWOX     | 16 | 0.00383265 | 0.6582364  | 0.612462777 | 0.773904201 |
| cg01171429 | WWP2;W   | 16 | 0.00614711 | 0.37046127 | 0.401175904 | 0.568735778 |
| cg05781582 | WWP2;W   | 16 | 0.00258141 | 0.12935148 | 0.118914207 | 0.298846572 |
| cg26884345 | WWP2;W   | 16 | 0.00148491 | 0.11864113 | 0.119049781 | 0.256532937 |
| cg00657810 | WWP2;W   | 16 | 0.00917376 | 0.16127408 | 0.147055859 | 0.323149818 |
| cg02712546 | WWP2;W   | 16 | 0.00637792 | 0.20146414 | 0.16822977  | 0.351782485 |
| cg08701134 | WWP2;W   | 16 | 0.00323448 | 0.20799215 | 0.214316557 | 0.385729414 |
| cg08419373 | WWP2;W   | 16 | 0.00190308 | 0.19776485 | 0.227927172 | 0.3320074   |
| cg01656717 | WWP2;W   | 16 | 0.00101054 | 0.14821844 | 0.182404151 | 0.374766235 |
| cg09036558 | WWP2;W   | 16 | 0.00101054 | 0.19048207 | 0.260910169 | 0.427782643 |
| cg26481896 | WWP2;W   | 16 | 0.00223182 | 0.1539091  | 0.185940132 | 0.30989549  |
| cg02412345 | XPO7;XPC | 8  | 0.02753451 | 0.28335752 | 0.306968933 | 0.432809858 |
| cg22272713 | XPO7;XPC | 8  | 0.00149088 | 0.11764609 | 0.132135863 | 0.254470478 |
| cg14514120 | XPOT     | 12 | 0.00081599 | 0.30607344 | 0.330981195 | 0.53189009  |
| cg27170268 | XRCC3;XF | 14 | 0.00553815 | 0.44162936 | 0.453664754 | 0.565551451 |
| cg02259047 | XRCC3;XF | 14 | 0.00425638 | 0.34957245 | 0.329392685 | 0.524215706 |
| cg10347949 | XRCC3;XF | 14 | 0.00177143 | 0.52428639 | 0.496144327 | 0.684225139 |
| cg13255208 | XRCC3;XF | 14 | 0.00113577 | 0.49537167 | 0.529275631 | 0.630730989 |
| cg25561904 | XRCC3;XF | 14 | 0.00112793 | 0.40299058 | 0.399931297 | 0.565407515 |
| cg02256455 | XRCC3;XF | 14 | 0.00119385 | 0.40089728 | 0.401354797 | 0.508756704 |
| cg07896448 | XYLT1    | 16 | 0.01024832 | 0.19752543 | 0.192963916 | 0.345651997 |
| cg16546017 | XYLT1    | 16 | 0.01580766 | 0.22834372 | 0.213116422 | 0.381271496 |
| cg26706077 | XYLT1    | 16 | 0.0078101  | 0.48402491 | 0.521353276 | 0.62836792  |
| cg06066697 | XYLT1    | 16 | 0.00620953 | 0.20948716 | 0.189462372 | 0.338248784 |
| cg07248440 | XYLT1    | 16 | 0.02174344 | 0.12839357 | 0.115656955 | 0.252624648 |
| cg06635133 | XYLT1    | 16 | 0.00070678 | 0.13620885 | 0.176955581 | 0.42193118  |
| cg04986899 | XYLT1    | 16 | 0.00151202 | 0.39042296 | 0.435647999 | 0.670749553 |
| cg15839431 | YJEFN3   | 19 | 0.00855749 | 0.29863158 | 0.272793762 | 0.405533153 |
| cg16640973 | YJEFN3   | 19 | 0.00575836 | 0.24413233 | 0.203908681 | 0.383534801 |
| cg01653532 | YPEL2    | 17 | 0.00158181 | 0.09626482 | 0.105368906 | 0.270440152 |
| cg10948088 | YPEL2    | 17 | 0.01884397 | 0.58286312 | 0.599888255 | 0.715252273 |
| cg26003360 | YPEL2    | 17 | 0.00339981 | 0.66469552 | 0.692834243 | 0.797208633 |
| cg21364719 | ZADH2    | 18 | 0.01529615 | 0.56517365 | 0.547941909 | 0.676856013 |
| cg24214000 | ZBED4    | 22 | 0.00298303 | 0.28779719 | 0.309320613 | 0.410114553 |
| cg11049439 | ZBTB12   | 6  | 0.00143276 | 0.18411294 | 0.201809435 | 0.43259129  |
| cg11349594 | ZBTB12   | 6  | 0.00310772 | 0.37354248 | 0.349943238 | 0.547380544 |
| cg03725573 | ZBTB16;Z | 11 | 0.00079883 | 0.18037869 | 0.20605179  | 0.342290352 |
| cg07631435 | ZBTB16;Z | 11 | 0.00232154 | 0.13621546 | 0.164573083 | 0.282396452 |
| cg12026858 | ZBTB16;Z | 11 | 0.00169556 | 0.32714219 | 0.362438232 | 0.600861065 |
| cg14373380 | ZBTB17   | 1  | 0.00447146 | 0.33922663 | 0.362979287 | 0.495486267 |
| cg07165288 | ZBTB20;Z | 3  | 0.00556197 | 0.17119899 | 0.151334112 | 0.330147535 |
| cg27168291 | ZBTB22;T | 6  | 0.00244246 | 0.28885387 | 0.25078355  | 0.401440588 |

|            |          |    |            |            |             |             |
|------------|----------|----|------------|------------|-------------|-------------|
| cg01620248 | ZBTB42   | 14 | 0.00190746 | 0.59448268 | 0.567386375 | 0.721970029 |
| cg09255505 | ZBTB42   | 14 | 0.00997311 | 0.53201437 | 0.503861984 | 0.654070218 |
| cg14918743 | ZBTB42   | 14 | 0.00118952 | 0.29006159 | 0.315716731 | 0.518530754 |
| cg12840850 | ZBTB46   | 20 | 0.00566397 | 0.36838875 | 0.382898246 | 0.500895662 |
| cg22735105 | ZBTB46   | 20 | 0.00355607 | 0.37891485 | 0.333469309 | 0.5308399   |
| cg04634182 | ZBTB47   | 3  | 0.0051238  | 0.61831996 | 0.560710744 | 0.722433119 |
| cg21250061 | ZBTB5    | 9  | 0.00701147 | 0.18118768 | 0.178127215 | 0.325527622 |
| cg04377850 | ZC3H18   | 16 | 0.01846658 | 0.48403459 | 0.500576393 | 0.605823157 |
| cg17517442 | ZC3H3    | 8  | 0.00627871 | 0.48436133 | 0.493923391 | 0.663372471 |
| cg15170442 | ZC3H3    | 8  | 0.00474032 | 0.39986938 | 0.363753918 | 0.514356446 |
| cg11329090 | ZC3H3    | 8  | 0.01465218 | 0.66823021 | 0.667618897 | 0.76959819  |
| cg11497758 | ZC3H3    | 8  | 0.01580766 | 0.53420599 | 0.556016035 | 0.656034928 |
| cg24974704 | ZC3H3    | 8  | 0.00360641 | 0.30596519 | 0.266943878 | 0.447607073 |
| cg12688965 | ZC3H3    | 8  | 0.00097337 | 0.25222085 | 0.348021477 | 0.52998546  |
| cg13191508 | ZC3H3    | 8  | 0.00177922 | 0.22245896 | 0.251218359 | 0.430026324 |
| cg08380064 | ZC3H3    | 8  | 0.00092849 | 0.486919   | 0.465889313 | 0.691457004 |
| cg04040861 | ZC3H3    | 8  | 0.00186737 | 0.24461109 | 0.234233543 | 0.398326453 |
| cg15681229 | ZC3H3    | 8  | 0.00126059 | 0.45436665 | 0.451760631 | 0.583846357 |
| cg14189808 | ZC3H4    | 19 | 0.00546552 | 0.15993133 | 0.150838956 | 0.293231999 |
| cg09095525 | ZC3H7A   | 16 | 0.01157637 | 0.16845472 | 0.145773948 | 0.277237973 |
| cg02896970 | ZCCHC14  | 16 | 0.00473973 | 0.45009331 | 0.461228901 | 0.57421528  |
| cg04772241 | ZCCHC14  | 16 | 0.00997311 | 0.1917501  | 0.200131606 | 0.320259205 |
| cg27414087 | ZCCHC14  | 16 | 0.01311724 | 0.27856983 | 0.242326308 | 0.428999219 |
| cg07894883 | ZCCHC24  | 10 | 0.00129968 | 0.49666795 | 0.446610233 | 0.617475396 |
| cg04920385 | ZCCHC24  | 10 | 0.00132036 | 0.10631085 | 0.116137241 | 0.245956162 |
| cg04904468 | ZCCHC24  | 10 | 0.01842786 | 0.5574937  | 0.541095885 | 0.673235072 |
| cg17310882 | ZDHHC14  | 6  | 0.00073118 | 0.16431004 | 0.220712452 | 0.385004944 |
| cg04116155 | ZEB1;ZEB | 10 | 0.00359124 | 0.64601629 | 0.665211807 | 0.798170224 |
| cg17552088 | ZFAND3   | 6  | 0.01608519 | 0.24420218 | 0.208154111 | 0.436798048 |
| cg08858926 | ZFH3;ZF  | 16 | 0.00244887 | 0.46829867 | 0.523227842 | 0.680546728 |
| cg07395439 | ZFH3;ZF  | 16 | 0.01227276 | 0.63094968 | 0.62470984  | 0.735154799 |
| cg06126698 | ZFPM1    | 16 | 0.01259427 | 0.48258323 | 0.387848894 | 0.600137635 |
| cg04117455 | ZFYVE21  | 14 | 0.0018485  | 0.24916298 | 0.225238073 | 0.494499731 |
| cg04162497 | ZFYVE21  | 14 | 0.00670577 | 0.30142925 | 0.29712807  | 0.410720564 |
| cg06946814 | ZFYVE21  | 14 | 0.00177554 | 0.56127224 | 0.556832431 | 0.758934979 |
| cg13154413 | ZFYVE21  | 14 | 0.00177922 | 0.39664143 | 0.449089429 | 0.600720079 |
| cg04984818 | ZFYVE21  | 14 | 0.01026117 | 0.6249691  | 0.642858768 | 0.770724047 |
| cg09924366 | ZFYVE21  | 14 | 0.00372084 | 0.26500882 | 0.243939253 | 0.365981507 |
| cg10126234 | ZFYVE21  | 14 | 0.00913085 | 0.35123214 | 0.345685167 | 0.502479046 |
| cg21167502 | ZFYVE21  | 14 | 0.02897628 | 0.5494859  | 0.507684159 | 0.663194402 |
| cg25580656 | ZFYVE21  | 14 | 0.00280512 | 0.51839505 | 0.515201739 | 0.658825939 |
| cg08489478 | ZFYVE27; | 10 | 0.00205127 | 0.45277076 | 0.527880084 | 0.686632709 |
| cg23859313 | ZFYVE28  | 4  | 0.00279997 | 0.44377794 | 0.436898621 | 0.588169801 |
| cg06035200 | ZHX2     | 8  | 0.00519569 | 0.1624944  | 0.134079309 | 0.339249573 |
| cg21926603 | ZHX2     | 8  | 0.00249952 | 0.17004825 | 0.179203559 | 0.339673669 |
| cg02743070 | ZMIZ1    | 10 | 0.00067897 | 0.32870123 | 0.357484452 | 0.508985712 |



|            |          |    |            |            |             |             |
|------------|----------|----|------------|------------|-------------|-------------|
| cg17823346 | ZMIZ1    | 10 | 0.00065949 | 0.08168704 | 0.106806998 | 0.214255723 |
| cg17065712 | ZMIZ1    | 10 | 0.00186737 | 0.43874247 | 0.469525955 | 0.572157499 |
| cg16201273 | ZMIZ1    | 10 | 0.0009968  | 0.67884373 | 0.68766113  | 0.790332559 |
| cg10812439 | ZMIZ1    | 10 | 0.03659438 | 0.48832868 | 0.483690207 | 0.615648841 |
| cg14841514 | ZMIZ1    | 10 | 0.00079224 | 0.38353122 | 0.424936829 | 0.529388016 |
| cg16815157 | ZMIZ1    | 10 | 0.00159601 | 0.51423134 | 0.495116537 | 0.636011592 |
| cg02851873 | ZMIZ1    | 10 | 0.00195    | 0.30005263 | 0.358816021 | 0.466139158 |
| cg01053681 | ZMIZ1    | 10 | 0.00197576 | 0.7034744  | 0.702445201 | 0.806291754 |
| cg09354331 | ZMIZ1    | 10 | 0.00248026 | 0.48331846 | 0.475174955 | 0.592936482 |
| cg10816687 | ZMIZ1    | 10 | 0.00317466 | 0.71029176 | 0.709273195 | 0.810566437 |
| cg14825905 | ZMIZ1    | 10 | 0.00101054 | 0.20188747 | 0.249978011 | 0.411178404 |
| cg20744163 | ZMIZ1    | 10 | 0.00358002 | 0.69472628 | 0.722237861 | 0.824503472 |
| cg02795981 | ZMIZ1    | 10 | 0.00227327 | 0.31497863 | 0.282598982 | 0.509326248 |
| cg20679052 | ZMIZ1    | 10 | 0.00168532 | 0.40515998 | 0.39165792  | 0.610026811 |
| cg25365214 | ZMIZ1    | 10 | 0.00113577 | 0.4641514  | 0.466856067 | 0.61130682  |
| cg04256907 | ZMIZ1    | 10 | 0.00405622 | 0.44974764 | 0.451938797 | 0.626207773 |
| cg15733068 | ZMIZ1    | 10 | 0.00117602 | 0.39992908 | 0.416157326 | 0.581962587 |
| cg24752964 | ZMIZ1    | 10 | 0.00553981 | 0.16803086 | 0.147589386 | 0.29884247  |
| cg19666787 | ZMIZ1    | 10 | 0.00183659 | 0.15637601 | 0.149676767 | 0.334672325 |
| cg13676902 | ZMIZ1    | 10 | 0.00147518 | 0.58171298 | 0.651045044 | 0.766655448 |
| cg19523667 | ZMIZ2;ZM | 7  | 0.00099274 | 0.16614396 | 0.191074281 | 0.312358774 |
| cg05141341 | ZMIZ2;ZM | 7  | 0.00174311 | 0.21240528 | 0.225225744 | 0.427076151 |
| cg15264273 | ZNF169   | 9  | 0.00590538 | 0.69678684 | 0.709809938 | 0.82420293  |
| cg14781805 | ZNF236   | 18 | 0.03515606 | 0.68003857 | 0.645311608 | 0.791382293 |
| cg10061906 | ZNF34    | 8  | 0.01130868 | 0.16216497 | 0.147856595 | 0.263520316 |
| cg20435267 | ZNF354B  | 5  | 0.01093903 | 0.5315955  | 0.547235967 | 0.653930387 |
| cg02712553 | ZNF365;Z | 10 | 0.00113577 | 0.61899929 | 0.665602169 | 0.783764998 |
| cg14700504 | ZNF365;Z | 10 | 0.01057629 | 0.43334128 | 0.458352537 | 0.578804856 |
| cg15872458 | ZNF385A; | 12 | 0.0009934  | 0.40300387 | 0.522001398 | 0.652443383 |
| cg17970299 | ZNF385A; | 12 | 0.00732161 | 0.26608498 | 0.190462567 | 0.366722575 |
| cg16000504 | ZNF385D  | 3  | 0.04020956 | 0.15499844 | 0.154669443 | 0.261505697 |
| cg19507160 | ZNF395   | 8  | 0.00806542 | 0.17832779 | 0.174909022 | 0.395549631 |
| cg10768564 | ZNF414;Z | 19 | 0.00459107 | 0.69565416 | 0.696852212 | 0.800277341 |
| cg15560061 | ZNF414;Z | 19 | 0.01011462 | 0.27133447 | 0.244811152 | 0.37509082  |
| cg02335656 | ZNF423   | 16 | 0.01134767 | 0.43825908 | 0.394434689 | 0.580519162 |
| cg27154394 | ZNF444   | 19 | 0.02003709 | 0.62408474 | 0.590046235 | 0.774583392 |
| cg26700277 | ZNF469   | 16 | 0.00453677 | 0.31687789 | 0.33233069  | 0.484426524 |
| cg10120897 | ZNF469   | 16 | 0.00218799 | 0.33107996 | 0.370831539 | 0.539586102 |
| cg16284674 | ZNF511;T | 10 | 0.00087343 | 0.30725755 | 0.347220096 | 0.597035012 |
| cg17675150 | ZNF532   | 18 | 0.02680411 | 0.3773816  | 0.405646385 | 0.56941405  |
| cg25401010 | ZNF532   | 18 | 0.01212299 | 0.41710235 | 0.485578979 | 0.621163565 |
| cg26804891 | ZNF598   | 16 | 0.00450394 | 0.38197828 | 0.322092998 | 0.507647387 |
| cg22589697 | ZNF608   | 5  | 0.02386355 | 0.41753711 | 0.416680787 | 0.524597502 |
| cg05957504 | ZNF608   | 5  | 0.00156239 | 0.26311783 | 0.322866137 | 0.540940771 |
| cg23598573 | ZNF609   | 15 | 0.00244887 | 0.45645044 | 0.528703568 | 0.673048206 |
| cg11964338 | ZNF610;Z | 19 | 0.00868337 | 0.35426915 | 0.3799416   | 0.549830383 |

|            |          |    |            |            |             |             |
|------------|----------|----|------------|------------|-------------|-------------|
| cg05342816 | ZNF707;Z | 8  | 0.0051754  | 0.69452177 | 0.587183823 | 0.823297834 |
| cg14110920 | ZNF740   | 12 | 0.01342633 | 0.17893703 | 0.175481847 | 0.283756551 |
| cg07999732 | ZNF775   | 7  | 0.00387834 | 0.55946554 | 0.551550677 | 0.669110696 |
| cg21326642 | ZNF777   | 7  | 0.01925109 | 0.74216449 | 0.762401514 | 0.863394735 |
| cg09427605 | ZNF827   | 4  | 0.00506149 | 0.23332922 | 0.19949436  | 0.45044939  |
| cg22598458 | ZNF92;ZN | 7  | 0.02168773 | 0.20658768 | 0.198776908 | 0.318452553 |
| cg12968041 | ZNRF3    | 22 | 0.02878476 | 0.37650484 | 0.353036342 | 0.497211281 |
| cg05325182 | ZSWIM4   | 19 | 0.00622936 | 0.26778129 | 0.272867809 | 0.379982439 |
| cg18590299 | ZZEF1    | 17 | 0.0075495  | 0.23264525 | 0.277919254 | 0.392785387 |
| cg09089118 |          | 7  | 0.00092849 | 0.24726873 | 0.311761717 | 0.458626571 |
| cg01433527 |          | 7  | 0.00269773 | 0.37129241 | 0.391228607 | 0.551050672 |
| cg18913924 |          | 7  | 0.00103001 | 0.42169427 | 0.455092449 | 0.592455991 |
| cg07115848 |          | 7  | 0.0283256  | 0.61299861 | 0.631158759 | 0.753690353 |
| cg23190268 |          | 7  | 0.02348349 | 0.57018623 | 0.644860646 | 0.791494347 |
| cg05657096 |          | 16 | 0.01378915 | 0.53535366 | 0.546702001 | 0.676099363 |
| cg26976707 |          | 11 | 0.02991399 | 0.33274073 | 0.322491561 | 0.459991491 |
| cg02095697 |          | 2  | 0.04635001 | 0.32981558 | 0.310035053 | 0.445854456 |
| cg23365135 |          | 7  | 0.03645999 | 0.2747985  | 0.287145331 | 0.391006306 |
| cg16784234 |          | 7  | 0.00262388 | 0.18119543 | 0.200646423 | 0.312720619 |
| cg03677126 |          | 5  | 0.01006689 | 0.36107642 | 0.410354727 | 0.52155883  |
| cg15254822 |          | 7  | 0.01596342 | 0.43051205 | 0.457290201 | 0.584238461 |
| cg04063906 |          | 7  | 0.00165724 | 0.46330015 | 0.533989127 | 0.673970845 |
| cg02084467 |          | 17 | 0.00176816 | 0.14374618 | 0.168473412 | 0.33693482  |
| cg04165337 |          | 8  | 0.03917446 | 0.58489155 | 0.438819339 | 0.688922623 |
| cg08900511 |          | 1  | 0.02240881 | 0.26808822 | 0.268657118 | 0.385998073 |
| cg05081908 |          | 4  | 0.00112235 | 0.23697284 | 0.268596241 | 0.401827883 |
| cg18169505 |          | 4  | 0.00193378 | 0.30249731 | 0.31873713  | 0.498343547 |
| cg02064798 |          | 4  | 0.00130462 | 0.33234944 | 0.354110881 | 0.556718441 |
| cg09223687 |          | 4  | 0.00703053 | 0.2598113  | 0.226931828 | 0.382748954 |
| cg15556591 |          | 4  | 0.00997311 | 0.33576217 | 0.316390728 | 0.468380104 |
| cg25428177 |          | 4  | 0.00585587 | 0.22508865 | 0.228004201 | 0.372507058 |
| cg01215742 |          | 16 | 0.00854289 | 0.20474911 | 0.165415433 | 0.31333024  |
| cg08886020 |          | 16 | 0.01366893 | 0.2424484  | 0.215392693 | 0.346828261 |
| cg16525974 |          | 16 | 0.00124521 | 0.65923915 | 0.629860195 | 0.763212748 |
| cg00624589 |          | 16 | 0.00936413 | 0.36613595 | 0.32603913  | 0.473879954 |
| cg18767278 |          | 5  | 0.00338717 | 0.25091209 | 0.217212305 | 0.426202095 |
| cg09776395 |          | 17 | 0.00513612 | 0.54792309 | 0.594341949 | 0.695319798 |
| cg09358961 |          | 16 | 0.0017637  | 0.49598773 | 0.516323132 | 0.619114924 |
| cg06091804 |          | 4  | 0.00756169 | 0.23399787 | 0.24393059  | 0.354181809 |
| cg09807446 |          | 16 | 0.01998122 | 0.3641908  | 0.330886533 | 0.508632352 |
| cg21118819 |          | 1  | 0.00174903 | 0.23300947 | 0.244951647 | 0.385536038 |
| cg25310427 |          | 11 | 0.00471011 | 0.61759879 | 0.627982593 | 0.743402968 |
| cg13750214 |          | 19 | 0.00295368 | 0.32460322 | 0.291382664 | 0.432063914 |
| cg10607454 |          | 7  | 0.00785654 | 0.35001151 | 0.328202889 | 0.455850208 |
| cg11902934 |          | 5  | 0.01296171 | 0.47698852 | 0.482357353 | 0.585841287 |
| cg18590119 |          | 6  | 0.04644539 | 0.55295399 | 0.568846825 | 0.679979852 |

|            |    |            |            |             |             |
|------------|----|------------|------------|-------------|-------------|
| cg04130549 | 6  | 0.00144385 | 0.13938268 | 0.159893003 | 0.31131095  |
| cg05006473 | 4  | 0.00179679 | 0.22062094 | 0.252114808 | 0.373221078 |
| cg22244039 | 4  | 0.01015703 | 0.583573   | 0.544603928 | 0.746320954 |
| cg11174255 | 4  | 0.02248036 | 0.66011434 | 0.725538109 | 0.845187048 |
| cg11599887 | 5  | 0.00403008 | 0.60280184 | 0.6182312   | 0.734175551 |
| cg27039593 | 5  | 0.00741048 | 0.18639744 | 0.189528786 | 0.296819128 |
| cg21129181 | 5  | 0.02310117 | 0.2379496  | 0.207793531 | 0.34874591  |
| cg14706317 | 5  | 0.00109472 | 0.39662861 | 0.441563218 | 0.555632126 |
| cg21297366 | 6  | 0.01825754 | 0.54759602 | 0.530196556 | 0.736324662 |
| cg04206219 | 6  | 0.00663932 | 0.27125066 | 0.27530218  | 0.382264063 |
| cg25460984 | 6  | 0.00141131 | 0.11529016 | 0.131757559 | 0.237233736 |
| cg19265546 | 7  | 0.00092643 | 0.55506223 | 0.558989726 | 0.699436927 |
| cg23879937 | 4  | 0.01465218 | 0.36174928 | 0.359820901 | 0.489438719 |
| cg08488569 | 4  | 0.01372997 | 0.27126852 | 0.229367222 | 0.406925119 |
| cg20387391 | 4  | 0.01891899 | 0.33058669 | 0.291727322 | 0.438545584 |
| cg10310751 | 11 | 0.00649    | 0.61489414 | 0.65135645  | 0.75756236  |
| cg05488279 | 17 | 0.04337605 | 0.32531199 | 0.337182448 | 0.444320827 |
| cg07007213 | 11 | 0.00133856 | 0.67266847 | 0.68568898  | 0.78941966  |
| cg10626792 | 11 | 0.00436875 | 0.39227216 | 0.42809167  | 0.565698232 |
| cg18490269 | 7  | 0.00127427 | 0.760162   | 0.749336082 | 0.860892614 |
| cg05006231 | 19 | 0.00133856 | 0.08361054 | 0.110854376 | 0.221817676 |
| cg12030226 | 11 | 0.0103127  | 0.21108379 | 0.196774817 | 0.354769775 |
| cg20741418 | 11 | 0.0106187  | 0.26478196 | 0.264918636 | 0.434649899 |
| cg03858917 | 11 | 0.00210972 | 0.14038707 | 0.147255901 | 0.288591442 |
| cg17223748 | 11 | 0.00480838 | 0.25880753 | 0.23779598  | 0.383583251 |
| cg16858121 | 11 | 0.0023961  | 0.72318668 | 0.740733116 | 0.846487108 |
| cg06258939 | 11 | 0.04698917 | 0.3800254  | 0.397457194 | 0.520652299 |
| cg19290938 | 11 | 0.00141412 | 0.36341475 | 0.382590485 | 0.543530643 |
| cg24465592 | 11 | 0.00756169 | 0.65751492 | 0.592530592 | 0.767844169 |
| cg19425295 | 11 | 0.00165724 | 0.4296935  | 0.390262996 | 0.606643493 |
| cg08637446 | 11 | 0.00155548 | 0.44135248 | 0.458400623 | 0.572329331 |
| cg26343563 | 12 | 0.00218063 | 0.29332416 | 0.293124573 | 0.469872035 |
| cg13821914 | 11 | 0.00866121 | 0.27551954 | 0.247127493 | 0.397631414 |
| cg14310533 | 12 | 0.00519569 | 0.41893322 | 0.419668359 | 0.654438558 |
| cg17164513 | 19 | 0.00218291 | 0.26817508 | 0.295899889 | 0.502071579 |
| cg02263444 | 5  | 0.00494816 | 0.38290191 | 0.363293778 | 0.503198424 |
| cg00574742 | 5  | 0.04382199 | 0.20338846 | 0.202254336 | 0.314053906 |
| cg24709511 | 1  | 0.00637792 | 0.34906555 | 0.321182451 | 0.454269499 |
| cg06250886 | 6  | 0.00701189 | 0.51831468 | 0.603947546 | 0.727415941 |
| cg27416412 | 4  | 0.00277682 | 0.55511973 | 0.569877873 | 0.690224371 |
| cg00259279 | 1  | 0.00589356 | 0.36252917 | 0.347423247 | 0.52063403  |
| cg26195356 | 5  | 0.0023961  | 0.17541882 | 0.20078763  | 0.305346082 |
| cg10809958 | 7  | 0.00796332 | 0.36796951 | 0.381489237 | 0.572910626 |
| cg05123755 | 7  | 0.04220346 | 0.71827609 | 0.706812217 | 0.846289441 |
| cg16252110 | 5  | 0.00314361 | 0.60861197 | 0.631821905 | 0.746368838 |
| cg18718469 | 6  | 0.02653106 | 0.29145736 | 0.323852927 | 0.427089854 |

|            |    |            |            |             |             |
|------------|----|------------|------------|-------------|-------------|
| cg14508405 | 2  | 0.01109894 | 0.32146589 | 0.318098404 | 0.441252505 |
| cg21964252 | 1  | 0.00991052 | 0.55886979 | 0.486053903 | 0.670522622 |
| cg23226249 | 1  | 0.00453677 | 0.25416143 | 0.282962978 | 0.425028885 |
| cg04229986 | 10 | 0.00420939 | 0.52295772 | 0.589326602 | 0.694056515 |
| cg01269702 | 2  | 0.00237009 | 0.23690417 | 0.272852025 | 0.45598876  |
| cg14595617 | 2  | 0.01019185 | 0.25961325 | 0.263427943 | 0.437790709 |
| cg07628073 | 19 | 0.00149088 | 0.62625826 | 0.607713196 | 0.731923897 |
| cg27070372 | 19 | 0.00478553 | 0.50208574 | 0.497888276 | 0.602663401 |
| cg15516052 | 11 | 0.01378059 | 0.30115239 | 0.348004334 | 0.458693116 |
| cg18384190 | 10 | 0.00490166 | 0.34896118 | 0.40060178  | 0.556678348 |
| cg20244327 | 10 | 0.00280262 | 0.11619558 | 0.128214524 | 0.285502209 |
| cg18054281 | 10 | 0.00411808 | 0.21737531 | 0.176374252 | 0.426520714 |
| cg10492240 | 4  | 0.00184091 | 0.20764873 | 0.242378825 | 0.37952659  |
| cg11256956 | 12 | 0.00708294 | 0.25435098 | 0.281119151 | 0.392396124 |
| cg16063018 | 12 | 0.00943797 | 0.33911403 | 0.3717131   | 0.516371347 |
| cg14099845 | 19 | 0.00548311 | 0.3576192  | 0.309485251 | 0.548447077 |
| cg15197458 | 19 | 0.00491697 | 0.41678551 | 0.398823751 | 0.545289789 |
| cg02859421 | 19 | 0.00602029 | 0.34330065 | 0.321777746 | 0.451630516 |
| cg07482222 | 19 | 0.01957651 | 0.4826055  | 0.425122958 | 0.587138558 |
| cg16377959 | 5  | 0.0086963  | 0.20879803 | 0.164156483 | 0.35228425  |
| cg21240684 | 2  | 0.00587243 | 0.4712138  | 0.428443616 | 0.59555667  |
| cg17855390 | 1  | 0.0063644  | 0.33038773 | 0.395875095 | 0.526217465 |
| cg25367559 | 12 | 0.00705117 | 0.13958391 | 0.118561243 | 0.260784631 |
| cg20594961 | 4  | 0.00429038 | 0.32386099 | 0.305723151 | 0.432668121 |
| cg03222374 | 4  | 0.00457044 | 0.2953351  | 0.279553939 | 0.403993756 |
| cg19480965 | 6  | 0.00201346 | 0.20330397 | 0.263579982 | 0.454863132 |
| cg06144418 | 2  | 0.01111549 | 0.58787794 | 0.551335481 | 0.712406927 |
| cg24221559 | 2  | 0.01463726 | 0.40955416 | 0.441085297 | 0.571647084 |
| cg05562828 | 17 | 0.03934159 | 0.28565735 | 0.275980428 | 0.399554462 |
| cg11204139 | 17 | 0.00130383 | 0.24779882 | 0.25787865  | 0.371330484 |
| cg09695851 | 17 | 0.00088355 | 0.30181254 | 0.345801354 | 0.475400449 |
| cg19504528 | 10 | 0.00099363 | 0.54371653 | 0.538967663 | 0.75387955  |
| cg18400751 | 19 | 0.01236318 | 0.58193894 | 0.583828206 | 0.696181828 |
| cg17729072 | 6  | 0.00287532 | 0.14344004 | 0.186313181 | 0.309051776 |
| cg01385708 | 16 | 0.00263648 | 0.14092782 | 0.132951677 | 0.289507213 |
| cg02574863 | 3  | 0.01021212 | 0.3968255  | 0.424221854 | 0.562631171 |
| cg09697697 | 17 | 0.00466831 | 0.22953288 | 0.22728398  | 0.367204586 |
| cg00349608 | 17 | 0.00306113 | 0.43030073 | 0.412908055 | 0.536282211 |
| cg04492459 | 17 | 0.00287532 | 0.29544224 | 0.269974532 | 0.511990944 |
| cg23678364 | 4  | 0.00104158 | 0.21499581 | 0.249041092 | 0.559893982 |
| cg08653258 | 3  | 0.01499384 | 0.33351961 | 0.341425361 | 0.508910853 |
| cg01414572 | 12 | 0.00403972 | 0.50123716 | 0.494230289 | 0.608831419 |
| cg06876766 | 12 | 0.0167445  | 0.50540527 | 0.518006592 | 0.627577024 |
| cg19993680 | 10 | 0.02496653 | 0.25003581 | 0.273060064 | 0.388218777 |
| cg18239481 | 10 | 0.0007283  | 0.1776284  | 0.244629815 | 0.457979167 |
| cg10410412 | 10 | 0.03931081 | 0.34469776 | 0.313964274 | 0.471911328 |

|            |    |            |            |             |             |
|------------|----|------------|------------|-------------|-------------|
| cg22321267 | 7  | 0.00287555 | 0.3597264  | 0.378240999 | 0.506310539 |
| cg09879604 | 12 | 0.02394548 | 0.5894351  | 0.633743411 | 0.739550325 |
| cg05881698 | 19 | 0.00362629 | 0.40054658 | 0.411465139 | 0.603611589 |
| cg14390263 | 9  | 0.01665976 | 0.20357373 | 0.175188517 | 0.342405925 |
| cg04705429 | 10 | 0.00658735 | 0.58576769 | 0.589922074 | 0.705752964 |
| cg03504160 | 4  | 0.03160477 | 0.47318976 | 0.463144476 | 0.584572706 |
| cg23418467 | 4  | 0.00140256 | 0.21894862 | 0.190037036 | 0.348609267 |
| cg22521263 | 4  | 0.00083679 | 0.24425166 | 0.268848971 | 0.406179293 |
| cg23612072 | 17 | 0.00364279 | 0.20642058 | 0.237005477 | 0.367576493 |
| cg04536588 | 10 | 0.01629158 | 0.40123988 | 0.395381698 | 0.572540968 |
| cg18986956 | 2  | 0.00574743 | 0.49675272 | 0.486293108 | 0.606861126 |
| cg24067325 | 5  | 0.01861071 | 0.47917116 | 0.518502051 | 0.629143217 |
| cg24384120 | 10 | 0.00122278 | 0.14367247 | 0.16527587  | 0.344054275 |
| cg15741354 | 8  | 0.00849487 | 0.23173517 | 0.231473014 | 0.340841167 |
| cg09225701 | 4  | 0.02003798 | 0.5437079  | 0.542826154 | 0.665682247 |
| cg01962750 | 2  | 0.00311324 | 0.32634077 | 0.384779137 | 0.524524264 |
| cg00562598 | 17 | 0.00233439 | 0.47125963 | 0.46399726  | 0.605975505 |
| cg14191955 | 17 | 0.00144811 | 0.3702258  | 0.36635023  | 0.562996613 |
| cg15406343 | 17 | 0.00427027 | 0.48120068 | 0.486820755 | 0.619861456 |
| cg00061635 | 17 | 0.00230932 | 0.17773646 | 0.202220951 | 0.320361118 |
| cg15629868 | 1  | 0.01040108 | 0.21000951 | 0.212942122 | 0.347864182 |
| cg03874542 | 10 | 0.04648826 | 0.4840981  | 0.480689209 | 0.596052011 |
| cg19209355 | 4  | 0.00206218 | 0.62769763 | 0.630189922 | 0.738490533 |
| cg05295696 | 4  | 0.00463097 | 0.61892541 | 0.60397338  | 0.728155559 |
| cg08490246 | 4  | 0.00735709 | 0.41886874 | 0.463534418 | 0.574626256 |
| cg21545013 | 1  | 0.00218597 | 0.28949573 | 0.284464588 | 0.445885515 |
| cg19704902 | 2  | 0.00130993 | 0.13148829 | 0.126418521 | 0.307524569 |
| cg08786370 | 4  | 0.00256449 | 0.63753091 | 0.693078582 | 0.842659079 |
| cg04361019 | 2  | 0.00238047 | 0.16955333 | 0.186447325 | 0.37079728  |
| cg06002476 | 3  | 0.00230737 | 0.27119319 | 0.32780231  | 0.478081494 |
| cg01099150 | 2  | 0.00377723 | 0.14721271 | 0.15566699  | 0.361315759 |
| cg00782839 | 2  | 0.00670577 | 0.23768047 | 0.267271348 | 0.455594627 |
| cg12204974 | 5  | 0.00444287 | 0.43175191 | 0.435969018 | 0.610833142 |
| cg08127108 | 2  | 0.00243597 | 0.29472264 | 0.312669994 | 0.518439711 |
| cg27230594 | 1  | 0.00244246 | 0.27115382 | 0.263685996 | 0.420311562 |
| cg01550810 | 1  | 0.00664725 | 0.55117538 | 0.594616929 | 0.741686264 |
| cg16455376 | 16 | 0.0020588  | 0.19718695 | 0.193229077 | 0.361693553 |
| cg24537275 | 17 | 0.00672923 | 0.5497258  | 0.486098195 | 0.657756987 |
| cg08787698 | 2  | 0.00485896 | 0.34606985 | 0.374672056 | 0.577250505 |
| cg02525997 | 8  | 0.00441677 | 0.13862881 | 0.139918468 | 0.245586542 |
| cg23606162 | 1  | 0.00211366 | 0.53590958 | 0.576717308 | 0.69513954  |
| cg08089449 | 11 | 0.00845805 | 0.72758017 | 0.727686044 | 0.838670445 |
| cg10992465 | 1  | 0.00485896 | 0.19238123 | 0.151747712 | 0.335315022 |
| cg24683121 | 2  | 0.00811207 | 0.66304746 | 0.617790691 | 0.821290975 |
| cg05804846 | 11 | 0.0019906  | 0.16290469 | 0.161320756 | 0.349177977 |
| cg19988235 | 2  | 0.00814151 | 0.3085593  | 0.314633891 | 0.456307957 |

|            |    |            |            |             |             |
|------------|----|------------|------------|-------------|-------------|
| cg16937583 | 3  | 0.00629918 | 0.34980376 | 0.345973595 | 0.508264989 |
| cg06657240 | 18 | 0.00118031 | 0.4934509  | 0.525993958 | 0.645836453 |
| cg16588492 | 12 | 0.00997527 | 0.36519201 | 0.329117711 | 0.506960644 |
| cg14359798 | 11 | 0.00074016 | 0.21451207 | 0.399105514 | 0.603916544 |
| cg25338818 | 18 | 0.00347082 | 0.49045421 | 0.489418489 | 0.623140253 |
| cg24998791 | 8  | 0.00853827 | 0.21277654 | 0.207749399 | 0.335290116 |
| cg16362189 | 11 | 0.00168532 | 0.28730868 | 0.298779193 | 0.573669861 |
| cg12499062 | 18 | 0.00342611 | 0.30030029 | 0.281456344 | 0.440703726 |
| cg01774019 | 4  | 0.03753328 | 0.37064161 | 0.357093933 | 0.476521052 |
| cg01413548 | 6  | 0.00144359 | 0.31872438 | 0.312448769 | 0.52628765  |
| cg26159128 | 4  | 0.0190357  | 0.19003307 | 0.150055685 | 0.302718333 |
| cg00594191 | 10 | 0.00090002 | 0.14349402 | 0.168235838 | 0.33682287  |
| cg08422172 | 16 | 0.00457097 | 0.50418149 | 0.511392398 | 0.616854256 |
| cg22004089 | 2  | 0.00197986 | 0.62195114 | 0.629133825 | 0.759682255 |
| cg20462100 | 1  | 0.00622936 | 0.50310844 | 0.52437493  | 0.651269865 |
| cg19771350 | 11 | 0.014833   | 0.48378997 | 0.481256999 | 0.658102702 |
| cg13866214 | 18 | 0.00283173 | 0.11687928 | 0.117445067 | 0.217725196 |
| cg19072083 | 2  | 0.02448461 | 0.23155591 | 0.267624415 | 0.373202131 |
| cg15135803 | 1  | 0.01366893 | 0.1720758  | 0.121496689 | 0.272471734 |
| cg07230078 | 4  | 0.00111104 | 0.22243529 | 0.251062374 | 0.439909342 |
| cg18384893 | 17 | 0.04879812 | 0.52239996 | 0.515296006 | 0.632701741 |
| cg26632875 | 12 | 0.00628685 | 0.10918841 | 0.122388606 | 0.242212791 |
| cg27511461 | 10 | 0.00126059 | 0.47031996 | 0.484491382 | 0.682661594 |
| cg21776813 | 3  | 0.00667841 | 0.24683977 | 0.231034708 | 0.368409684 |
| cg13824456 | 7  | 0.01006689 | 0.67491481 | 0.677106699 | 0.884612022 |
| cg08879390 | 19 | 0.00383289 | 0.41295774 | 0.431770003 | 0.56886712  |
| cg19499614 | 17 | 0.00459107 | 0.17739098 | 0.172093391 | 0.328474648 |
| cg08301211 | 6  | 0.00114928 | 0.48318604 | 0.553057068 | 0.68778435  |
| cg09425032 | 19 | 0.00193378 | 0.32170443 | 0.259419257 | 0.459998778 |
| cg12871937 | 3  | 0.00338706 | 0.4749399  | 0.5076618   | 0.609780026 |
| cg12146763 | 17 | 0.00774063 | 0.22984036 | 0.169956099 | 0.336301367 |
| cg09148630 | 6  | 0.00119376 | 0.17810445 | 0.192798239 | 0.383501511 |
| cg09571082 | 6  | 0.00911882 | 0.25481651 | 0.221251013 | 0.364013363 |
| cg24219974 | 6  | 0.00146929 | 0.44257852 | 0.4878359   | 0.591073603 |
| cg09858767 | 1  | 0.0084915  | 0.13845506 | 0.14413559  | 0.252806453 |
| cg01289290 | 3  | 0.00111524 | 0.58811877 | 0.651160185 | 0.76059373  |
| cg02852847 | 1  | 0.00173648 | 0.5423785  | 0.570098049 | 0.706139124 |
| cg00366236 | 17 | 0.01093065 | 0.39569473 | 0.412723948 | 0.561331852 |
| cg23429664 | 10 | 0.00111281 | 0.28958907 | 0.379024176 | 0.630486069 |
| cg16426034 | 11 | 0.00158407 | 0.20262815 | 0.247425279 | 0.463216451 |
| cg23332827 | 11 | 0.00404842 | 0.30812437 | 0.308233574 | 0.460671213 |
| cg06256007 | 11 | 0.00810421 | 0.22629149 | 0.199201736 | 0.327678936 |
| cg06359632 | 11 | 0.04390149 | 0.49682857 | 0.510804223 | 0.638222816 |
| cg03624438 | 3  | 0.01980822 | 0.36846482 | 0.303004378 | 0.486211193 |
| cg11804725 | 3  | 0.00225589 | 0.1012042  | 0.101280323 | 0.242208665 |
| cg22542685 | 17 | 0.0147494  | 0.63065291 | 0.640876685 | 0.760378625 |

|            |    |            |            |             |             |
|------------|----|------------|------------|-------------|-------------|
| cg09011316 | 1  | 0.00140256 | 0.37955578 | 0.43214833  | 0.546889271 |
| cg22251148 | 11 | 0.01580869 | 0.21240486 | 0.219467946 | 0.35275214  |
| cg20101110 | 11 | 0.00401281 | 0.23080982 | 0.282926239 | 0.46767112  |
| cg10969209 | 1  | 0.04648826 | 0.20265509 | 0.198077334 | 0.304585667 |
| cg01872122 | 5  | 0.00753326 | 0.24671509 | 0.226696354 | 0.35901918  |
| cg19516754 | 6  | 0.00219711 | 0.20712137 | 0.201313899 | 0.40548259  |
| cg15842898 | 4  | 0.04768316 | 0.23588935 | 0.234105691 | 0.363454375 |
| cg18869244 | 17 | 0.00128133 | 0.17979844 | 0.192922859 | 0.407651568 |
| cg17419514 | 7  | 0.00595346 | 0.63376514 | 0.603853479 | 0.793770371 |
| cg03291548 | 22 | 0.00538453 | 0.37501836 | 0.38285809  | 0.519183293 |
| cg17209471 | 22 | 0.0025393  | 0.26677778 | 0.312292524 | 0.547364837 |
| cg12656424 | 2  | 0.00150566 | 0.62608679 | 0.663720277 | 0.770256203 |
| cg17882587 | 2  | 0.00856489 | 0.15292784 | 0.143576932 | 0.283716068 |
| cg10244770 | 12 | 0.02069475 | 0.46239689 | 0.458740892 | 0.589846401 |
| cg09936919 | 2  | 0.00173154 | 0.18488351 | 0.181957168 | 0.480724825 |
| cg01230988 | 17 | 0.03270435 | 0.25264546 | 0.226346606 | 0.381495383 |
| cg06720014 | 1  | 0.00372456 | 0.36099129 | 0.412486362 | 0.57816418  |
| cg07584582 | 22 | 0.00146177 | 0.26559422 | 0.288094096 | 0.516072958 |
| cg08866876 | 8  | 0.01309134 | 0.23323598 | 0.201631284 | 0.416970074 |
| cg23291376 | 2  | 0.01183547 | 0.45698254 | 0.484561473 | 0.612735647 |
| cg00830419 | 2  | 0.00521564 | 0.6330714  | 0.65394323  | 0.778330069 |
| cg09139491 | 13 | 0.01206219 | 0.44752931 | 0.477105857 | 0.593467567 |
| cg18899220 | 13 | 0.01666517 | 0.43966963 | 0.443868645 | 0.547571351 |
| cg08264835 | 1  | 0.00634238 | 0.42583966 | 0.439439801 | 0.583816802 |
| cg25430713 | 2  | 0.00958999 | 0.24975381 | 0.222579616 | 0.377056451 |
| cg23992493 | 17 | 0.00276938 | 0.38660464 | 0.328328612 | 0.514265221 |
| cg08392142 | 13 | 0.03166005 | 0.28552044 | 0.266585441 | 0.394339007 |
| cg17404640 | 6  | 0.01446513 | 0.40203729 | 0.455792332 | 0.572812123 |
| cg02451502 | 13 | 0.00526183 | 0.2212353  | 0.187724769 | 0.334699045 |
| cg00792968 | 13 | 0.00195    | 0.3772175  | 0.446234516 | 0.633067445 |
| cg11315081 | 13 | 0.00295256 | 0.70054206 | 0.721964749 | 0.826542563 |
| cg14863944 | 13 | 0.00331728 | 0.67819575 | 0.712847001 | 0.82748659  |
| cg02067239 | 16 | 0.00377723 | 0.21937785 | 0.248014433 | 0.460099031 |
| cg19994159 | 13 | 0.00576931 | 0.30846804 | 0.33711173  | 0.480168248 |
| cg06711873 | 19 | 0.00392454 | 0.15306269 | 0.13592347  | 0.258165639 |
| cg23864514 | 7  | 0.01178392 | 0.40075427 | 0.377395571 | 0.603144277 |
| cg20073893 | 14 | 0.00107365 | 0.32851813 | 0.409064078 | 0.558525635 |
| cg23117727 | 20 | 0.00658735 | 0.64355192 | 0.648656863 | 0.764820064 |
| cg08026493 | 8  | 0.00162163 | 0.33419806 | 0.372037043 | 0.537478254 |
| cg20845639 | 8  | 0.00233734 | 0.22171225 | 0.217336949 | 0.333786943 |
| cg19577365 | 14 | 0.00345706 | 0.3522233  | 0.37566122  | 0.496825688 |
| cg12646386 | 1  | 0.01320626 | 0.42626109 | 0.469972397 | 0.591575958 |
| cg00005740 | 13 | 0.00682394 | 0.36269335 | 0.369141584 | 0.49956654  |
| cg05801374 | 1  | 0.00123203 | 0.33014352 | 0.388677076 | 0.494569306 |
| cg05210480 | 7  | 0.00345706 | 0.2614354  | 0.288589045 | 0.42819091  |
| cg00491577 | 2  | 0.01154279 | 0.27881634 | 0.246157986 | 0.459398315 |

|            |    |            |            |             |             |
|------------|----|------------|------------|-------------|-------------|
| cg06151171 | 2  | 0.00679225 | 0.23853905 | 0.247528367 | 0.43383327  |
| cg03160656 | 4  | 0.01810942 | 0.37446587 | 0.454573569 | 0.59416763  |
| cg22183373 | 4  | 0.02389893 | 0.51718487 | 0.503683193 | 0.674169345 |
| cg02924972 | 13 | 0.0252514  | 0.5614878  | 0.572342751 | 0.703729401 |
| cg25772185 | 10 | 0.00388546 | 0.1785362  | 0.175222825 | 0.361197987 |
| cg02681163 | 8  | 0.00715821 | 0.35040802 | 0.377317651 | 0.535350885 |
| cg17590003 | 17 | 0.00391578 | 0.21566277 | 0.22494664  | 0.344157418 |
| cg21897970 | 17 | 0.00327239 | 0.31219163 | 0.353992467 | 0.481789146 |
| cg08549390 | 7  | 0.00092985 | 0.1263993  | 0.1654345   | 0.368179536 |
| cg09501314 | 15 | 0.00107365 | 0.14402489 | 0.175397773 | 0.344571884 |
| cg24985060 | 15 | 0.00472614 | 0.21270036 | 0.151986789 | 0.431355117 |
| cg12315995 | 15 | 0.00439411 | 0.20875815 | 0.146689034 | 0.37783784  |
| cg27574223 | 12 | 0.00230737 | 0.17849851 | 0.202297383 | 0.310301862 |
| cg03665255 | 6  | 0.01773077 | 0.29808169 | 0.248067319 | 0.419677568 |
| cg21917512 | 2  | 0.02078916 | 0.22966758 | 0.222850595 | 0.403519049 |
| cg08243094 | 1  | 0.01543666 | 0.40404154 | 0.426844805 | 0.574440601 |
| cg18985738 | 11 | 0.00302287 | 0.13681517 | 0.165586496 | 0.320104539 |
| cg15741935 | 2  | 0.00166335 | 0.31196126 | 0.341357343 | 0.446836605 |
| cg17431023 | 7  | 0.00638555 | 0.27147051 | 0.27553442  | 0.396196559 |
| cg09976157 | 6  | 0.02172582 | 0.28344783 | 0.365100463 | 0.46746487  |
| cg24527636 | 1  | 0.00468549 | 0.19847491 | 0.22394322  | 0.375521993 |
| cg03413253 | 12 | 0.00296353 | 0.60038136 | 0.52683832  | 0.713032114 |
| cg10143823 | 14 | 0.00224923 | 0.31286763 | 0.304897313 | 0.564313124 |
| cg08029969 | 16 | 0.00613201 | 0.32924567 | 0.307286846 | 0.448593897 |
| cg02553872 | 16 | 0.00806395 | 0.33089573 | 0.331721436 | 0.467556891 |
| cg22609511 | 7  | 0.00935896 | 0.20568672 | 0.248601002 | 0.348601607 |
| cg02621030 | 16 | 0.01237003 | 0.64727601 | 0.685580883 | 0.808638737 |
| cg09039112 | 16 | 0.00453677 | 0.6717947  | 0.688598085 | 0.804786121 |
| cg16528596 | 16 | 0.00177922 | 0.25494905 | 0.258676986 | 0.407373574 |
| cg25927044 | 10 | 0.01021297 | 0.2665815  | 0.283087766 | 0.391347898 |
| cg10484693 | 10 | 0.00112235 | 0.18382305 | 0.192475362 | 0.383250694 |
| cg04649852 | 16 | 0.01585745 | 0.28172752 | 0.248560368 | 0.38774794  |
| cg09007841 | 16 | 0.00463443 | 0.28363111 | 0.240943601 | 0.416688977 |
| cg09345153 | 16 | 0.0157424  | 0.23398225 | 0.229205436 | 0.341144921 |
| cg09320079 | 16 | 0.00522751 | 0.16570454 | 0.193734434 | 0.356788497 |
| cg07356338 | 16 | 0.00461358 | 0.34791015 | 0.371210911 | 0.495784544 |
| cg27438754 | 16 | 0.01332867 | 0.24523075 | 0.267018736 | 0.450023444 |
| cg22840887 | 10 | 0.0051502  | 0.16836    | 0.15196236  | 0.373706782 |
| cg00286119 | 8  | 0.01888833 | 0.24673343 | 0.228885065 | 0.376822809 |
| cg03147324 | 15 | 0.00314981 | 0.23657068 | 0.240765219 | 0.351828394 |
| cg13018639 | 14 | 0.03219604 | 0.5819932  | 0.495587287 | 0.683325442 |
| cg23375895 | 6  | 0.01585898 | 0.42579864 | 0.451533552 | 0.556967107 |
| cg24335092 | 3  | 0.01580766 | 0.20876445 | 0.189105698 | 0.332514499 |
| cg05098589 | 10 | 0.00073118 | 0.54254548 | 0.626218338 | 0.791241521 |
| cg19667811 | 10 | 0.00117377 | 0.08395261 | 0.086797146 | 0.206067174 |
| cg10533060 | 16 | 0.0012026  | 0.67095553 | 0.693333023 | 0.8291932   |



|            |    |            |            |             |             |
|------------|----|------------|------------|-------------|-------------|
| cg04935436 | 20 | 0.00491882 | 0.19455873 | 0.194541403 | 0.315970011 |
| cg16444826 | 2  | 0.00556972 | 0.22350361 | 0.214376175 | 0.415536465 |
| cg24167667 | 3  | 0.02935375 | 0.20318096 | 0.241453627 | 0.380404472 |
| cg22282089 | 13 | 0.02172582 | 0.41833097 | 0.361386734 | 0.558464371 |
| cg21249595 | 6  | 0.00263536 | 0.53607282 | 0.53398085  | 0.642627567 |
| cg06369155 | 13 | 0.02817047 | 0.51895201 | 0.557715971 | 0.679954003 |
| cg02264079 | 16 | 0.0071227  | 0.34753198 | 0.357332285 | 0.476560385 |
| cg04702989 | 16 | 0.03174689 | 0.395375   | 0.407999697 | 0.536783708 |
| cg05928033 | 1  | 0.00401094 | 0.26767707 | 0.232273039 | 0.394702876 |
| cg24366665 | 13 | 0.00669541 | 0.52288397 | 0.519597159 | 0.649418788 |
| cg17382879 | 13 | 0.00371278 | 0.51695229 | 0.534438836 | 0.669422881 |
| cg19735151 | 10 | 0.00509941 | 0.41588172 | 0.45841847  | 0.600655116 |
| cg11703759 | 1  | 0.02641471 | 0.66613386 | 0.656471491 | 0.766790755 |
| cg03727169 | 10 | 0.00134295 | 0.29672992 | 0.311685243 | 0.42888928  |
| cg04589649 | 2  | 0.00126466 | 0.24422511 | 0.283361117 | 0.600695743 |
| cg25417675 | 6  | 0.00670317 | 0.19744716 | 0.185203281 | 0.304273433 |
| cg15417287 | 12 | 0.00375959 | 0.19360846 | 0.155402818 | 0.303066592 |
| cg17082026 | 13 | 0.00428303 | 0.39934113 | 0.474950265 | 0.621538489 |
| cg09502809 | 1  | 0.00127413 | 0.47293888 | 0.491729113 | 0.622468946 |
| cg16311740 | 3  | 0.00068904 | 0.30206101 | 0.357458347 | 0.503951637 |
| cg22593432 | 13 | 0.01643588 | 0.15283162 | 0.163079855 | 0.2936974   |
| cg23027179 | 5  | 0.00412029 | 0.27964724 | 0.224724255 | 0.465693939 |
| cg01481251 | 11 | 0.04650849 | 0.32945765 | 0.333494849 | 0.460604705 |
| cg09548241 | 1  | 0.00308097 | 0.14326452 | 0.129204903 | 0.291909789 |
| cg26070099 | 1  | 0.01398927 | 0.35836567 | 0.302749901 | 0.494663226 |
| cg22501483 | 7  | 0.0190357  | 0.37251677 | 0.364461815 | 0.517852021 |
| cg16522412 | 13 | 0.00643366 | 0.12101264 | 0.116947502 | 0.243648138 |
| cg14299572 | 10 | 0.00092259 | 0.16345103 | 0.18369693  | 0.303213527 |
| cg00527307 | 13 | 0.01354962 | 0.62167995 | 0.598016938 | 0.741524739 |
| cg03741824 | 21 | 0.00820352 | 0.31938201 | 0.325972265 | 0.437385451 |
| cg18833994 | 5  | 0.00532167 | 0.32107854 | 0.353451348 | 0.504763095 |
| cg12370929 | 9  | 0.01748472 | 0.20821117 | 0.196665599 | 0.309592262 |
| cg07220149 | 17 | 0.02638649 | 0.3074858  | 0.268970041 | 0.428126981 |
| cg17540450 | 13 | 0.00087274 | 0.2080098  | 0.312278242 | 0.471452548 |
| cg06228857 | 15 | 0.00896145 | 0.31825568 | 0.346524949 | 0.541479063 |
| cg26107642 | 5  | 0.00620321 | 0.23266933 | 0.271592015 | 0.419913252 |
| cg12784272 | 17 | 0.01997904 | 0.25955365 | 0.248585841 | 0.367848218 |
| cg05686379 | 7  | 0.01015703 | 0.2445814  | 0.201404222 | 0.40197922  |
| cg27022420 | 17 | 0.00112849 | 0.5151692  | 0.528612216 | 0.680484663 |
| cg26891237 | 6  | 0.00246645 | 0.14479108 | 0.13478547  | 0.348628858 |
| cg20098468 | 8  | 0.01870855 | 0.27669359 | 0.26225169  | 0.432585426 |
| cg11202634 | 8  | 0.00715821 | 0.44951215 | 0.42833853  | 0.55461393  |
| cg19067025 | 15 | 0.0011571  | 0.29421181 | 0.389245587 | 0.596480567 |
| cg22286764 | 3  | 0.00186737 | 0.16326023 | 0.168181409 | 0.278700418 |
| cg04245294 | 3  | 0.00517777 | 0.37683453 | 0.382337822 | 0.570505793 |
| cg11466131 | 22 | 0.02049456 | 0.56494494 | 0.533905205 | 0.717275297 |

|            |    |            |            |             |             |
|------------|----|------------|------------|-------------|-------------|
| cg25695992 | 2  | 0.00170239 | 0.43298044 | 0.528646633 | 0.697310783 |
| cg01021196 | 14 | 0.03305066 | 0.24007279 | 0.213951384 | 0.349042857 |
| cg18451016 | 1  | 0.00447688 | 0.17642854 | 0.130563554 | 0.290620537 |
| cg06444374 | 1  | 0.00816896 | 0.62434736 | 0.617488857 | 0.728466776 |
| cg04848137 | 8  | 0.01317683 | 0.2047205  | 0.185251242 | 0.326159516 |
| cg26068090 | 13 | 0.01896129 | 0.4066343  | 0.455133725 | 0.571560907 |
| cg20684375 | 8  | 0.04645191 | 0.23149576 | 0.24065344  | 0.349923841 |
| cg26241893 | 5  | 0.00220384 | 0.46249575 | 0.374662758 | 0.613659101 |
| cg23165992 | 5  | 0.04406604 | 0.583657   | 0.593473306 | 0.696437786 |
| cg25943481 | 15 | 0.001879   | 0.35030903 | 0.365461214 | 0.551330384 |
| cg14410733 | 15 | 0.001223   | 0.27850995 | 0.294865675 | 0.395324798 |
| cg00270974 | 6  | 0.00953692 | 0.18956428 | 0.153170296 | 0.362561279 |
| cg27657363 | 22 | 0.00349377 | 0.28298431 | 0.322175235 | 0.498474099 |
| cg00618626 | 17 | 0.00306113 | 0.40465728 | 0.407312257 | 0.528524086 |
| cg21879236 | 5  | 0.00705117 | 0.18043076 | 0.162325176 | 0.370399185 |
| cg07849237 | 17 | 0.00682394 | 0.6364198  | 0.641010625 | 0.76665611  |
| cg26884359 | 17 | 0.00113577 | 0.16855191 | 0.189025792 | 0.379843873 |
| cg14482712 | 15 | 0.00067859 | 0.26037042 | 0.319944581 | 0.481369523 |
| cg23114476 | 5  | 0.00208745 | 0.28077893 | 0.261649184 | 0.528494922 |
| cg22615203 | 13 | 0.00098825 | 0.24710673 | 0.321656778 | 0.555276925 |
| cg20886660 | 13 | 0.00318264 | 0.44314122 | 0.523706364 | 0.653024364 |
| cg04754683 | 8  | 0.01718572 | 0.47607379 | 0.516203783 | 0.659971614 |
| cg15305352 | 6  | 0.00238378 | 0.17287471 | 0.212970768 | 0.395275171 |
| cg14732815 | 6  | 0.01980843 | 0.23492308 | 0.208427371 | 0.351368946 |
| cg08244518 | 22 | 0.00168532 | 0.47566604 | 0.515298585 | 0.621874387 |
| cg08037719 | 1  | 0.0012838  | 0.35942643 | 0.451790197 | 0.63003214  |
| cg06238004 | 17 | 0.00766486 | 0.26379459 | 0.203518701 | 0.379393426 |
| cg03656290 | 4  | 0.00515785 | 0.19193221 | 0.183748799 | 0.345054395 |
| cg04495313 | 4  | 0.00591291 | 0.2201483  | 0.218124694 | 0.334414712 |
| cg08357895 | 5  | 0.0020562  | 0.19185518 | 0.198726483 | 0.448062599 |
| cg09772333 | 19 | 0.01905936 | 0.31451103 | 0.280144962 | 0.433347798 |
| cg04570228 | 13 | 0.02768694 | 0.34921559 | 0.355327771 | 0.461757003 |
| cg06815361 | 8  | 0.01715886 | 0.49226186 | 0.470419454 | 0.602180628 |
| cg23201188 | 3  | 0.0033048  | 0.27109289 | 0.365978721 | 0.516907303 |
| cg01817364 | 5  | 0.03488234 | 0.34143093 | 0.327253389 | 0.447542316 |
| cg17427675 | 5  | 0.00548794 | 0.42662272 | 0.43266535  | 0.612490469 |
| cg05422883 | 2  | 0.00295256 | 0.53385316 | 0.529841207 | 0.66510315  |
| cg15360478 | 2  | 0.01398104 | 0.2698581  | 0.238078916 | 0.404570599 |
| cg13215995 | 17 | 0.00241305 | 0.24743249 | 0.230824377 | 0.359641111 |
| cg07621853 | 2  | 0.00077582 | 0.53441017 | 0.569475749 | 0.790383857 |
| cg05672223 | 2  | 0.00208621 | 0.3296455  | 0.307057941 | 0.443884683 |
| cg14706297 | 2  | 0.00233439 | 0.18658096 | 0.132746184 | 0.29436026  |
| cg00909401 | 2  | 0.00103447 | 0.48567497 | 0.558909558 | 0.710819517 |
| cg01243072 | 2  | 0.00106261 | 0.22791513 | 0.306248387 | 0.421544282 |
| cg05753629 | 1  | 0.00275824 | 0.3814694  | 0.428825901 | 0.592376186 |
| cg01403655 | 13 | 0.02360575 | 0.61101881 | 0.605964411 | 0.717691621 |

|            |    |            |            |             |             |
|------------|----|------------|------------|-------------|-------------|
| cg01019249 | 5  | 0.0016453  | 0.6110813  | 0.61571279  | 0.721739161 |
| cg27360992 | 22 | 0.00298303 | 0.22212608 | 0.243915047 | 0.453384674 |
| cg15526213 | 10 | 0.0074197  | 0.47762623 | 0.464030629 | 0.59143264  |
| cg07095818 | 20 | 0.00367708 | 0.18816495 | 0.188006499 | 0.360767122 |
| cg04609694 | 6  | 0.00563553 | 0.23498212 | 0.253499723 | 0.411864226 |
| cg05215056 | 10 | 0.01311902 | 0.3961423  | 0.410411606 | 0.529530149 |
| cg17504641 | 10 | 0.00193378 | 0.31986154 | 0.321915895 | 0.481562839 |
| cg01019484 | 6  | 0.02938665 | 0.28981853 | 0.291041062 | 0.391445957 |
| cg22757418 | 6  | 0.00168741 | 0.6251986  | 0.672912473 | 0.773310592 |
| cg06976222 | 1  | 0.02106374 | 0.48722021 | 0.589199571 | 0.707359199 |
| cg07099073 | 6  | 0.00180881 | 0.58908603 | 0.667162799 | 0.807325062 |
| cg04809712 | 7  | 0.00535203 | 0.63706634 | 0.681841545 | 0.785131509 |
| cg03155825 | 7  | 0.00174783 | 0.22642161 | 0.262965331 | 0.478937441 |
| cg22991039 | 21 | 0.00252735 | 0.39415143 | 0.348541722 | 0.563673399 |
| cg04914930 | 13 | 0.00323448 | 0.16758746 | 0.180653167 | 0.341864316 |
| cg26703511 | 21 | 0.00312811 | 0.34940758 | 0.357778449 | 0.520420617 |
| cg14223001 | 11 | 0.01009622 | 0.2123712  | 0.184274519 | 0.320285887 |
| cg00615941 | 3  | 0.00315582 | 0.39559375 | 0.426795771 | 0.591104549 |
| cg01369207 | 2  | 0.00713358 | 0.48304655 | 0.458289694 | 0.600380222 |
| cg02093902 | 2  | 0.00539451 | 0.11780223 | 0.110790725 | 0.227142677 |
| cg15765353 | 3  | 0.04760642 | 0.29186795 | 0.342081604 | 0.468440374 |
| cg18749015 | 6  | 0.00071094 | 0.08927287 | 0.138340402 | 0.293333721 |
| cg12019475 | 6  | 0.0026964  | 0.18251323 | 0.179221656 | 0.383051387 |
| cg00348891 | 13 | 0.00806542 | 0.23246557 | 0.218282751 | 0.354032114 |
| cg25668878 | 3  | 0.00192049 | 0.57168605 | 0.593269169 | 0.702574536 |
| cg00490603 | 22 | 0.00274286 | 0.15765094 | 0.151686488 | 0.265681708 |
| cg11378001 | 21 | 0.00174311 | 0.26545838 | 0.235858256 | 0.429040254 |
| cg24489344 | 22 | 0.00280852 | 0.36752552 | 0.367857871 | 0.489363706 |
| cg03343669 | 2  | 0.00663932 | 0.27792985 | 0.27638982  | 0.445239187 |
| cg07704235 | 18 | 0.00073118 | 0.54718578 | 0.658694328 | 0.772984542 |
| cg15294263 | 21 | 0.00248015 | 0.29988988 | 0.268167229 | 0.41655815  |
| cg09604238 | 12 | 0.00845805 | 0.52752692 | 0.525868545 | 0.628761724 |
| cg06350882 | 7  | 0.00912728 | 0.51138275 | 0.500522778 | 0.63729728  |
| cg13554773 | 17 | 0.0373326  | 0.48770992 | 0.519778518 | 0.648586248 |
| cg14327359 | 2  | 0.00733126 | 0.35521995 | 0.367759553 | 0.52662344  |
| cg18064917 | 2  | 0.00245414 | 0.3563401  | 0.451862431 | 0.606010572 |
| cg13604150 | 21 | 0.00470488 | 0.63919241 | 0.670675358 | 0.808156357 |
| cg00129785 | 21 | 0.02241528 | 0.47308068 | 0.508567613 | 0.617811259 |
| cg22964758 | 12 | 0.00752854 | 0.544816   | 0.593369705 | 0.709249789 |
| cg25073998 | 2  | 0.00551198 | 0.12929663 | 0.124462277 | 0.241370501 |
| cg23101632 | 2  | 0.0103161  | 0.14655506 | 0.127276138 | 0.276515279 |
| cg00092565 | 21 | 0.00626821 | 0.21071479 | 0.196670555 | 0.390282146 |
| cg16425161 | 15 | 0.03853559 | 0.39308096 | 0.340357029 | 0.501910544 |
| cg20430104 | 7  | 0.00964959 | 0.45620912 | 0.476261633 | 0.593136053 |
| cg02518338 | 17 | 0.0101333  | 0.40980788 | 0.3256401   | 0.520754944 |
| cg05310240 | 17 | 0.00908203 | 0.42384049 | 0.453793699 | 0.559126798 |

|            |    |            |            |             |             |
|------------|----|------------|------------|-------------|-------------|
| cg18553570 | 12 | 0.01289795 | 0.18195103 | 0.15913309  | 0.326619405 |
| cg06212297 | 16 | 0.00066232 | 0.45652569 | 0.553931805 | 0.670773798 |
| cg02411088 | 17 | 0.00152273 | 0.11696478 | 0.1253447   | 0.256690781 |
| cg16401668 | 1  | 0.04452792 | 0.31528681 | 0.316358678 | 0.438595054 |
| cg02470587 | 12 | 0.00851187 | 0.1313798  | 0.104478734 | 0.263121277 |
| cg22919538 | 3  | 0.00181386 | 0.54833371 | 0.573439315 | 0.724400527 |
| cg19513492 | 12 | 0.00177922 | 0.23051534 | 0.264856345 | 0.398852098 |
| cg20597127 | 1  | 0.00218291 | 0.23192184 | 0.257240501 | 0.444256232 |
| cg03810376 | 1  | 0.00088355 | 0.14073679 | 0.158815176 | 0.31636661  |
| cg06260709 | 20 | 0.00542561 | 0.22218978 | 0.205038639 | 0.344142351 |
| cg06801658 | 20 | 0.02658897 | 0.45278696 | 0.426366411 | 0.606755744 |
| cg09814448 | 1  | 0.02389893 | 0.36805965 | 0.338572703 | 0.507988225 |
| cg17152266 | 19 | 0.00441677 | 0.50934814 | 0.543412261 | 0.646144689 |
| cg01898377 | 20 | 0.00248015 | 0.31991222 | 0.309108256 | 0.5503871   |
| cg05765734 | 8  | 0.00694471 | 0.20105781 | 0.163914713 | 0.301488996 |
| cg20384325 | 15 | 0.00101423 | 0.60862544 | 0.574987506 | 0.712445269 |
| cg26702098 | 8  | 0.00354346 | 0.37104138 | 0.409908421 | 0.571260826 |
| cg16322269 | 8  | 0.00100059 | 0.42462566 | 0.454608984 | 0.610177132 |
| cg21463446 | 8  | 0.00419158 | 0.48830273 | 0.510584387 | 0.683595449 |
| cg15257489 | 8  | 0.00083228 | 0.17150237 | 0.217734144 | 0.444980297 |
| cg24183575 | 3  | 0.00129758 | 0.41024217 | 0.437869558 | 0.544540056 |
| cg17516571 | 8  | 0.01183117 | 0.25898682 | 0.273044489 | 0.431054362 |
| cg06034711 | 8  | 0.00072814 | 0.53380174 | 0.593141691 | 0.695474364 |
| cg01502811 | 16 | 0.00092643 | 0.54861809 | 0.539514032 | 0.743283511 |
| cg26811425 | 16 | 0.00364379 | 0.2206755  | 0.165357052 | 0.336497659 |
| cg25920857 | 3  | 0.01278326 | 0.43446987 | 0.398716413 | 0.546622133 |
| cg03295274 | 13 | 0.03431393 | 0.10287231 | 0.098698216 | 0.203430734 |
| cg24800883 | 5  | 0.01010425 | 0.24371261 | 0.282868236 | 0.435951175 |
| cg19885001 | 13 | 0.01390151 | 0.46370829 | 0.496169209 | 0.624090714 |
| cg00465247 | 13 | 0.01244196 | 0.3284284  | 0.34553967  | 0.460893793 |
| cg17388712 | 7  | 0.01776318 | 0.24228179 | 0.247826681 | 0.37601654  |
| cg22143274 | 5  | 0.01430511 | 0.47390645 | 0.449870248 | 0.606619206 |
| cg04251886 | 14 | 0.01356792 | 0.52684433 | 0.459804993 | 0.632004491 |
| cg11807040 | 13 | 0.01158752 | 0.43588755 | 0.454985623 | 0.572708164 |
| cg05777602 | 16 | 0.01910705 | 0.55675028 | 0.547073527 | 0.701103554 |
| cg24352299 | 13 | 0.00642316 | 0.55587476 | 0.615432248 | 0.723635008 |
| cg00750630 | 14 | 0.00164959 | 0.46992735 | 0.564611066 | 0.679681866 |
| cg01265068 | 13 | 0.04581055 | 0.72730854 | 0.738740497 | 0.847915389 |
| cg05261299 | 12 | 0.0012838  | 0.25479692 | 0.326637061 | 0.439323715 |
| cg25351353 | 12 | 0.00913085 | 0.44332378 | 0.439345686 | 0.558280687 |
| cg17485988 | 7  | 0.0012026  | 0.27093099 | 0.29078954  | 0.502830282 |
| cg05382185 | 6  | 0.02999866 | 0.4671203  | 0.454311503 | 0.627634914 |
| cg00491530 | 12 | 0.00336153 | 0.46979595 | 0.46040959  | 0.609515486 |
| cg11936809 | 8  | 0.0094452  | 0.34897933 | 0.363814165 | 0.528119646 |
| cg05051799 | 6  | 0.03525194 | 0.21549444 | 0.21601509  | 0.384745226 |
| cg11841288 | 1  | 0.01630619 | 0.53684499 | 0.558065103 | 0.693434413 |

|            |    |            |            |             |             |
|------------|----|------------|------------|-------------|-------------|
| cg26785370 | 17 | 0.004607   | 0.32121699 | 0.343553015 | 0.495964664 |
| cg24543939 | 5  | 0.02970062 | 0.1744583  | 0.151309458 | 0.28823503  |
| cg17091056 | 2  | 0.00931986 | 0.22453635 | 0.226304039 | 0.409869496 |
| cg05138082 | 14 | 0.02362077 | 0.41463957 | 0.408994212 | 0.517737909 |
| cg03221837 | 16 | 0.00237687 | 0.29253272 | 0.321641952 | 0.483484436 |
| cg14833626 | 4  | 0.00081789 | 0.21937464 | 0.307684231 | 0.502186533 |
| cg22115196 | 4  | 0.01463726 | 0.4429042  | 0.470977159 | 0.580522278 |
| cg09290893 | 17 | 0.00337574 | 0.27268679 | 0.271498471 | 0.407318413 |
| cg16278514 | 3  | 0.0013661  | 0.26888074 | 0.339039952 | 0.464089027 |
| cg17073708 | 8  | 0.0347271  | 0.38831943 | 0.394968029 | 0.504971958 |
| cg25249728 | 2  | 0.00162163 | 0.14472551 | 0.173979055 | 0.347486058 |
| cg07006398 | 16 | 0.01289795 | 0.48673777 | 0.519884557 | 0.623698709 |
| cg04013650 | 8  | 0.00830789 | 0.57704048 | 0.613531647 | 0.713927513 |
| cg22680536 | 4  | 0.00646891 | 0.26533054 | 0.237871856 | 0.41324433  |
| cg10783149 | 14 | 0.01446542 | 0.31268167 | 0.261402617 | 0.420244376 |
| cg06443678 | 17 | 0.00315576 | 0.47973411 | 0.532628705 | 0.649857227 |
| cg19595295 | 17 | 0.0011206  | 0.22100201 | 0.234304237 | 0.435689047 |
| cg13767779 | 17 | 0.00152273 | 0.39384749 | 0.457522642 | 0.589930976 |
| cg13212831 | 1  | 0.01998122 | 0.62494724 | 0.614946464 | 0.747325548 |
| cg19241927 | 1  | 0.02634735 | 0.31310794 | 0.333213326 | 0.526250593 |
| cg01905690 | 14 | 0.00716181 | 0.23010422 | 0.200017222 | 0.339884572 |
| cg14377849 | 1  | 0.01164124 | 0.23559869 | 0.168601021 | 0.361340712 |
| cg11818544 | 5  | 0.01539932 | 0.4480764  | 0.49047118  | 0.620025806 |
| cg14883605 | 14 | 0.02317852 | 0.28743361 | 0.278677156 | 0.421963162 |
| cg17011134 | 1  | 0.0010058  | 0.58195915 | 0.596942001 | 0.708317386 |
| cg11738198 | 1  | 0.00283456 | 0.18921517 | 0.224525257 | 0.346619522 |
| cg13482375 | 17 | 0.00457097 | 0.21225778 | 0.199134855 | 0.345135081 |
| cg24741744 | 18 | 0.00186737 | 0.26747747 | 0.260511277 | 0.474002521 |
| cg12741572 | 18 | 0.00168656 | 0.31662693 | 0.312452339 | 0.536387684 |
| cg22300615 | 20 | 0.03488893 | 0.36312752 | 0.374253216 | 0.504085276 |
| cg17074989 | 15 | 0.00524189 | 0.21571116 | 0.2872982   | 0.412949757 |
| cg17479898 | 1  | 0.00509941 | 0.43809451 | 0.494021756 | 0.631266899 |
| cg13494055 | 3  | 0.00263491 | 0.60104182 | 0.624231941 | 0.738423775 |
| cg14244013 | 17 | 0.00066232 | 0.15840294 | 0.210429426 | 0.315326974 |
| cg09767588 | 1  | 0.00117894 | 0.26838671 | 0.331619049 | 0.580344545 |
| cg17139283 | 1  | 0.00219711 | 0.70717202 | 0.719044062 | 0.840784604 |
| cg07579884 | 14 | 0.00403008 | 0.32109594 | 0.350356752 | 0.504474492 |
| cg09798077 | 5  | 0.00569156 | 0.5199839  | 0.550803053 | 0.656317796 |
| cg11254532 | 1  | 0.0011104  | 0.26460429 | 0.30267017  | 0.448855862 |
| cg25769127 | 3  | 0.00142756 | 0.33782402 | 0.347578637 | 0.509427641 |
| cg09213451 | 14 | 0.00217555 | 0.43808296 | 0.476627624 | 0.588403699 |
| cg03753942 | 8  | 0.0283256  | 0.39664952 | 0.384062686 | 0.509687584 |
| cg22968789 | 15 | 0.00323448 | 0.21893335 | 0.22015848  | 0.400683397 |
| cg05917797 | 14 | 0.00263954 | 0.12269625 | 0.093268055 | 0.265407213 |
| cg24690715 | 20 | 0.00725225 | 0.32308595 | 0.350009854 | 0.507198484 |
| cg05599759 | 20 | 0.00113577 | 0.24147242 | 0.253970075 | 0.441281022 |

|            |    |            |            |             |             |
|------------|----|------------|------------|-------------|-------------|
| cg23819144 | 10 | 0.00197515 | 0.55879359 | 0.592929669 | 0.732241661 |
| cg13385601 | 15 | 0.01980843 | 0.20465317 | 0.173418994 | 0.339565216 |
| cg27251686 | 2  | 0.02577962 | 0.62483769 | 0.623124712 | 0.734193365 |
| cg26987928 | 15 | 0.00116059 | 0.55025976 | 0.616040463 | 0.743253442 |
| cg01744607 | 15 | 0.00438281 | 0.3351164  | 0.433171156 | 0.543383491 |
| cg15851389 | 15 | 0.00116059 | 0.60617136 | 0.644961868 | 0.758708923 |
| cg05276184 | 15 | 0.00380612 | 0.14511267 | 0.141442824 | 0.33132993  |
| cg02243157 | 2  | 0.01783758 | 0.47816753 | 0.497004052 | 0.640693887 |
| cg09802893 | 7  | 0.0080143  | 0.63312823 | 0.648031557 | 0.762231307 |
| cg16993013 | 15 | 0.00670577 | 0.65938426 | 0.664382146 | 0.770074834 |
| cg16572600 | 11 | 0.00233439 | 0.26122133 | 0.242628482 | 0.445270918 |
| cg26097711 | 15 | 0.01831034 | 0.18555819 | 0.170445569 | 0.313924665 |
| cg18528696 | 12 | 0.04062029 | 0.39396407 | 0.36052605  | 0.494211469 |
| cg00847221 | 17 | 0.03075767 | 0.35417698 | 0.377282494 | 0.563884944 |
| cg05339976 | 2  | 0.00629918 | 0.34295128 | 0.326076915 | 0.473772316 |
| cg00997998 | 14 | 0.00292358 | 0.65686439 | 0.620912445 | 0.77778132  |
| cg11746048 | 11 | 0.00168532 | 0.26904482 | 0.328469227 | 0.572954347 |
| cg01292856 | 11 | 0.01164121 | 0.60438074 | 0.595921126 | 0.714027682 |
| cg16175245 | 11 | 0.01378915 | 0.194356   | 0.193799469 | 0.306566268 |
| cg20743628 | 7  | 0.02457877 | 0.24223176 | 0.243468005 | 0.399010026 |
| cg00978505 | 1  | 0.00291636 | 0.49831432 | 0.526967371 | 0.647921023 |
| cg17010895 | 2  | 0.01746225 | 0.4720955  | 0.544561107 | 0.655735164 |
| cg03995968 | 16 | 0.04406604 | 0.31387169 | 0.300979548 | 0.418456328 |
| cg12905176 | 3  | 0.01111106 | 0.34365873 | 0.3553207   | 0.487430704 |
| cg03116409 | 12 | 0.01482933 | 0.36813724 | 0.390114049 | 0.530461444 |
| cg03819089 | 2  | 0.03227846 | 0.46469549 | 0.445591868 | 0.625735885 |
| cg22375757 | 3  | 0.00129968 | 0.35771709 | 0.395922997 | 0.581019698 |
| cg27133959 | 3  | 0.04936492 | 0.44250496 | 0.354957871 | 0.543009759 |
| cg19967176 | 15 | 0.00223213 | 0.53199748 | 0.548480277 | 0.659127534 |
| cg07909444 | 17 | 0.00883762 | 0.45827609 | 0.401439099 | 0.562615967 |
| cg16627836 | 2  | 0.04062029 | 0.30574917 | 0.29216356  | 0.41926218  |
| cg11680908 | 5  | 0.00155548 | 0.70319469 | 0.675724915 | 0.841634831 |
| cg26893699 | 17 | 0.01620455 | 0.29480013 | 0.362274654 | 0.471259707 |
| cg14574066 | 11 | 0.00106261 | 0.16928096 | 0.18344088  | 0.334629171 |
| cg09743615 | 11 | 0.00294138 | 0.5990303  | 0.617240313 | 0.736970104 |
| cg15857051 | 14 | 0.00225672 | 0.16458363 | 0.164281373 | 0.379280689 |
| cg02645287 | 16 | 0.00209829 | 0.51758266 | 0.506408454 | 0.633483162 |
| cg06597413 | 11 | 0.00068904 | 0.33018711 | 0.406415793 | 0.541746259 |
| cg26290155 | 14 | 0.01009664 | 0.16970586 | 0.175246714 | 0.310033722 |
| cg02116942 | 2  | 0.01980843 | 0.1437215  | 0.115342702 | 0.245509983 |
| cg01152374 | 15 | 0.00367708 | 0.16445996 | 0.180904344 | 0.303995844 |
| cg03025413 | 8  | 0.01034491 | 0.5730842  | 0.46523865  | 0.677323912 |
| cg04852323 | 16 | 0.00195644 | 0.42555466 | 0.451348423 | 0.607438785 |
| cg00549064 | 16 | 0.00108543 | 0.10341203 | 0.111215628 | 0.279111166 |
| cg14445366 | 17 | 0.00073547 | 0.19688258 | 0.318368584 | 0.460222429 |
| cg13544294 | 17 | 0.00247655 | 0.18696263 | 0.189027364 | 0.293939169 |

|            |    |            |            |             |             |
|------------|----|------------|------------|-------------|-------------|
| cg02274236 | 7  | 0.00179679 | 0.18427087 | 0.19639796  | 0.418882631 |
| cg02327773 | 7  | 0.0039229  | 0.14678308 | 0.151779935 | 0.327544442 |
| cg18542967 | 7  | 0.00702785 | 0.14200924 | 0.156809395 | 0.313000133 |
| cg14498227 | 11 | 0.00147559 | 0.26529665 | 0.306489944 | 0.413341694 |
| cg14041701 | 11 | 0.00197986 | 0.26291989 | 0.259057263 | 0.50793335  |
| cg20933897 | 17 | 0.00483111 | 0.41387375 | 0.503517001 | 0.610161698 |
| cg19051238 | 12 | 0.04237386 | 0.23221118 | 0.233303939 | 0.372264816 |
| cg14125530 | 12 | 0.00621701 | 0.20654069 | 0.174311902 | 0.322787489 |
| cg04147969 | 15 | 0.00075518 | 0.08501659 | 0.112140108 | 0.244071093 |
| cg09256716 | 17 | 0.03221861 | 0.17225495 | 0.134012635 | 0.295963172 |
| cg12109883 | 15 | 0.00218429 | 0.17920626 | 0.221367841 | 0.404578516 |
| cg26848957 | 17 | 0.0070644  | 0.41331063 | 0.531487013 | 0.637356106 |
| cg23681616 | 17 | 0.00126804 | 0.51535499 | 0.597120414 | 0.747975092 |
| cg19298400 | 17 | 0.00174721 | 0.38048525 | 0.409005119 | 0.550866267 |
| cg24930059 | 17 | 0.012575   | 0.21983916 | 0.18881042  | 0.35164115  |
| cg05565697 | 15 | 0.00088355 | 0.41263133 | 0.461873642 | 0.597568669 |
| cg05199904 | 5  | 0.00159552 | 0.14997685 | 0.148444074 | 0.311256338 |
| cg04525683 | 14 | 0.04382199 | 0.4840153  | 0.486556031 | 0.596114107 |
| cg27540038 | 15 | 0.02101935 | 0.29885762 | 0.32237917  | 0.432332116 |
| cg11877773 | 14 | 0.00237508 | 0.42483756 | 0.445240827 | 0.557553174 |
| cg00196474 | 3  | 0.01411406 | 0.17862588 | 0.14148615  | 0.335076251 |
| cg21470704 | 2  | 0.00211366 | 0.28426319 | 0.347638873 | 0.513694864 |
| cg24516106 | 2  | 0.00318676 | 0.16514459 | 0.182302554 | 0.333991037 |
| cg22163280 | 17 | 0.00569156 | 0.16921188 | 0.168164409 | 0.290575623 |
| cg00051307 | 5  | 0.04052436 | 0.44916006 | 0.416234229 | 0.566270259 |
| cg01454395 | 17 | 0.00355472 | 0.19487965 | 0.194196394 | 0.30901924  |
| cg12809483 | 5  | 0.00168532 | 0.29134521 | 0.357839145 | 0.553838972 |
| cg11423680 | 5  | 0.00079224 | 0.13598831 | 0.154701723 | 0.29206955  |
| cg05155038 | 5  | 0.00233734 | 0.49458121 | 0.523325809 | 0.659215659 |
| cg25889504 | 7  | 0.02473841 | 0.39247261 | 0.397135933 | 0.532092881 |
| cg14297340 | 9  | 0.0412314  | 0.20478304 | 0.16735083  | 0.324359282 |
| cg19502359 | 11 | 0.00074381 | 0.1496229  | 0.19916248  | 0.302703881 |
| cg12741293 | 7  | 0.00405622 | 0.12784733 | 0.125681683 | 0.250801944 |
| cg17500962 | 16 | 0.00240097 | 0.52925229 | 0.553862991 | 0.690322356 |
| cg08818377 | 7  | 0.00113577 | 0.33946201 | 0.32856838  | 0.543687432 |
| cg00305740 | 7  | 0.00852172 | 0.32672517 | 0.340321098 | 0.45962169  |
| cg27298940 | 7  | 0.00843889 | 0.29534308 | 0.290288406 | 0.404307137 |
| cg26611650 | 16 | 0.01482933 | 0.41557745 | 0.416449825 | 0.555931158 |
| cg23844085 | 18 | 0.00648185 | 0.2517091  | 0.263852079 | 0.417160728 |
| cg23096806 | 10 | 0.00165724 | 0.24658466 | 0.300148538 | 0.426475246 |
| cg10924875 | 8  | 0.00675316 | 0.24563663 | 0.222731127 | 0.347380445 |
| cg25149122 | 18 | 0.00079512 | 0.29752271 | 0.349281524 | 0.509465786 |
| cg27421117 | 2  | 0.00725763 | 0.54295083 | 0.535674781 | 0.661464599 |
| cg03457984 | 2  | 0.00293735 | 0.4969862  | 0.524284732 | 0.625773505 |
| cg03742250 | 17 | 0.01896129 | 0.32807593 | 0.270814413 | 0.429938515 |
| cg04524475 | 13 | 0.00973492 | 0.34490684 | 0.31731961  | 0.507499616 |

|            |    |            |            |             |             |
|------------|----|------------|------------|-------------|-------------|
| cg21059878 | 4  | 0.00128133 | 0.49635389 | 0.420460839 | 0.656992767 |
| cg10020890 | 16 | 0.00126059 | 0.39499464 | 0.449334703 | 0.563034779 |
| cg01555052 | 14 | 0.02108987 | 0.48853806 | 0.529398917 | 0.635814124 |
| cg14886850 | 14 | 0.02214521 | 0.22897801 | 0.277050995 | 0.381051324 |
| cg10031989 | 16 | 0.00745134 | 0.21025844 | 0.1931772   | 0.346576217 |
| cg01824933 | 17 | 0.00830789 | 0.6655099  | 0.646215767 | 0.78438687  |
| cg01765623 | 17 | 0.01000517 | 0.19385673 | 0.1664236   | 0.33562374  |
| cg01128025 | 4  | 0.0016785  | 0.32194735 | 0.3263221   | 0.546283839 |
| cg16087077 | 15 | 0.028548   | 0.50503398 | 0.504674646 | 0.605780254 |
| cg23086519 | 14 | 0.0012838  | 0.14632764 | 0.173441278 | 0.313416103 |
| cg17990185 | 17 | 0.00429038 | 0.63305425 | 0.640758307 | 0.745316506 |
| cg14523804 | 17 | 0.00122358 | 0.44831517 | 0.559892453 | 0.713971185 |
| cg17723381 | 12 | 0.00576931 | 0.16079597 | 0.143442915 | 0.30399444  |
| cg23499779 | 12 | 0.00455738 | 0.53444774 | 0.609265824 | 0.720421672 |
| cg16020437 | 12 | 0.00395976 | 0.16640567 | 0.116511107 | 0.287316665 |
| cg27366617 | 18 | 0.01663906 | 0.24779338 | 0.229823064 | 0.36496843  |
| cg05843312 | 7  | 0.00388546 | 0.2255257  | 0.302910256 | 0.424457872 |
| cg27107963 | 18 | 0.0111106  | 0.30457401 | 0.328665559 | 0.488375223 |
| cg11856476 | 12 | 0.02524768 | 0.33382212 | 0.363879056 | 0.468907588 |
| cg10108888 | 7  | 0.03209984 | 0.61642425 | 0.637464382 | 0.74343861  |
| cg11596779 | 5  | 0.00152405 | 0.3872121  | 0.323037463 | 0.528190029 |
| cg13307782 | 5  | 0.00857669 | 0.37797276 | 0.309894285 | 0.518952139 |
| cg19109570 | 18 | 0.02794807 | 0.51421725 | 0.44418446  | 0.627406069 |
| cg02571436 | 10 | 0.00073378 | 0.147229   | 0.196487454 | 0.497366748 |
| cg17141972 | 6  | 0.00168532 | 0.64387497 | 0.639156154 | 0.802304803 |
| cg01387072 | 4  | 0.002727   | 0.35823249 | 0.326512007 | 0.498530811 |
| cg19547330 | 5  | 0.01665976 | 0.24830653 | 0.224611594 | 0.403204343 |
| cg06646139 | 4  | 0.00205947 | 0.15137281 | 0.157603777 | 0.402436853 |
| cg04313941 | 15 | 0.00152988 | 0.65503096 | 0.615143821 | 0.779277019 |
| cg19359940 | 13 | 0.03363259 | 0.56349502 | 0.521296536 | 0.674347457 |
| cg07197092 | 2  | 0.01093065 | 0.48414849 | 0.502500293 | 0.64731066  |
| cg00540400 | 15 | 0.03153279 | 0.39729958 | 0.359709924 | 0.537344223 |
| cg07311419 | 11 | 0.0167445  | 0.19235017 | 0.195130822 | 0.325982423 |
| cg21393885 | 17 | 0.00314038 | 0.51509508 | 0.577402865 | 0.70184514  |
| cg21430752 | 17 | 0.00138618 | 0.55798993 | 0.597593525 | 0.720897947 |
| cg20219172 | 17 | 0.0016785  | 0.46772065 | 0.454495484 | 0.598319063 |
| cg21034531 | 17 | 0.00202182 | 0.64870875 | 0.680337744 | 0.821650934 |
| cg02744699 | 17 | 0.00166583 | 0.67381484 | 0.708900338 | 0.840940675 |
| cg14951856 | 10 | 0.00279455 | 0.50321313 | 0.488179604 | 0.640083559 |
| cg17100047 | 10 | 0.0042005  | 0.1774398  | 0.158277457 | 0.280063769 |
| cg08326300 | 10 | 0.00228672 | 0.14772725 | 0.165079987 | 0.326885421 |
| cg14962025 | 11 | 0.0190357  | 0.48576338 | 0.473955495 | 0.650138607 |
| cg18745317 | 5  | 0.00937895 | 0.42745648 | 0.443843471 | 0.579982117 |
| cg26207372 | 7  | 0.00783809 | 0.70154623 | 0.643442607 | 0.839300773 |
| cg11411968 | 3  | 0.0035878  | 0.55009952 | 0.528498118 | 0.691050519 |
| cg07818978 | 15 | 0.01952894 | 0.28990878 | 0.235803064 | 0.407262037 |



|            |    |            |            |             |             |
|------------|----|------------|------------|-------------|-------------|
| cg22405226 | 6  | 0.01126796 | 0.16779332 | 0.136599975 | 0.274363068 |
| cg09214892 | 16 | 0.00144958 | 0.49532914 | 0.562683771 | 0.722053945 |
| cg13537774 | 9  | 0.00417366 | 0.56524756 | 0.606133985 | 0.721993768 |
| cg26710983 | 16 | 0.00336153 | 0.32339478 | 0.36117279  | 0.542043562 |
| cg26955580 | 16 | 0.00093183 | 0.69723689 | 0.716106491 | 0.818530598 |
| cg08057411 | 16 | 0.00458661 | 0.47026908 | 0.467042337 | 0.61523264  |
| cg06214869 | 7  | 0.01177597 | 0.26886712 | 0.343069469 | 0.472112721 |
| cg00925054 | 1  | 0.01660506 | 0.30040646 | 0.281805268 | 0.413981035 |
| cg20267580 | 1  | 0.00904361 | 0.28685851 | 0.270712746 | 0.418798434 |
| cg02203714 | 16 | 0.00132756 | 0.42567754 | 0.470294264 | 0.593765151 |
| cg01275133 | 16 | 0.00354864 | 0.19811439 | 0.197315943 | 0.415763713 |
| cg06213047 | 16 | 0.00202314 | 0.23476551 | 0.275507295 | 0.501222785 |
| cg06259351 | 16 | 0.00283173 | 0.60501832 | 0.582747757 | 0.71959445  |
| cg09274961 | 16 | 0.01336583 | 0.37986424 | 0.360656149 | 0.523456598 |
| cg06761167 | 16 | 0.00116286 | 0.24785168 | 0.293344407 | 0.451227003 |
| cg09437523 | 16 | 0.0012026  | 0.40803513 | 0.452910424 | 0.667534449 |
| cg07725206 | 1  | 0.00089205 | 0.13225928 | 0.156974242 | 0.258199949 |
| cg10228981 | 16 | 0.00080814 | 0.57773828 | 0.626557107 | 0.744414415 |
| cg08390381 | 16 | 0.00521893 | 0.73451452 | 0.68918942  | 0.847215495 |
| cg06984848 | 16 | 0.02651696 | 0.20946167 | 0.181653924 | 0.328495313 |
| cg07765595 | 16 | 0.00101423 | 0.33491633 | 0.360273882 | 0.531762864 |
| cg02522990 | 16 | 0.00066204 | 0.44389743 | 0.552749774 | 0.66079262  |
| cg03096954 | 16 | 0.00195613 | 0.36372486 | 0.32424369  | 0.480106157 |
| cg20208979 | 6  | 0.00314981 | 0.32044225 | 0.327858155 | 0.528237382 |
| cg05540639 | 16 | 0.00429038 | 0.22607643 | 0.24257551  | 0.397483378 |
| cg02244233 | 10 | 0.00310446 | 0.22869108 | 0.290532087 | 0.400850952 |
| cg04607671 | 16 | 0.00097509 | 0.39591221 | 0.436991301 | 0.582764638 |
| cg00834923 | 16 | 0.00081046 | 0.20687321 | 0.248645978 | 0.369185558 |
| cg00866541 | 16 | 0.00147559 | 0.39801064 | 0.463247227 | 0.652214878 |
| cg08550517 | 16 | 0.00065949 | 0.17253488 | 0.2529967   | 0.449649577 |
| cg08006672 | 16 | 0.00703549 | 0.6305209  | 0.619501178 | 0.74101384  |
| cg05824809 | 16 | 0.01408624 | 0.29331241 | 0.29996051  | 0.41860715  |
| cg01481978 | 16 | 0.00588728 | 0.29611301 | 0.308021746 | 0.471028217 |
| cg27219972 | 16 | 0.01430792 | 0.21923692 | 0.202540712 | 0.346179977 |
| cg00101940 | 16 | 0.00168532 | 0.28752498 | 0.268714716 | 0.461824571 |
| cg27338109 | 16 | 0.00128724 | 0.42356763 | 0.412809934 | 0.553269625 |
| cg05905731 | 16 | 0.00130534 | 0.39938213 | 0.397157609 | 0.524039661 |
| cg25045013 | 15 | 0.00806542 | 0.54654335 | 0.549367939 | 0.677899495 |
| cg27065717 | 16 | 0.00098825 | 0.61870139 | 0.675593714 | 0.784607893 |
| cg10174683 | 16 | 0.00220808 | 0.34261358 | 0.371970182 | 0.528399083 |
| cg01072388 | 16 | 0.04804069 | 0.26667284 | 0.223407396 | 0.377790888 |
| cg07066163 | 16 | 0.00170736 | 0.63165857 | 0.597526597 | 0.769506469 |
| cg11524773 | 6  | 0.00578816 | 0.22935577 | 0.291289656 | 0.407772315 |
| cg04213390 | 2  | 0.00071044 | 0.12373085 | 0.202997424 | 0.331784186 |
| cg09296742 | 14 | 0.0252514  | 0.27923317 | 0.273777266 | 0.436853381 |
| cg01984854 | 16 | 0.00777499 | 0.34784699 | 0.294768498 | 0.452473619 |

|            |    |            |            |             |             |
|------------|----|------------|------------|-------------|-------------|
| cg08183425 | 2  | 0.00160732 | 0.40595525 | 0.393970258 | 0.508035548 |
| cg00925244 | 2  | 0.0066366  | 0.21936198 | 0.246333287 | 0.347622013 |
| cg05021291 | 2  | 0.01782206 | 0.43364888 | 0.45491958  | 0.633091896 |
| cg01234251 | 11 | 0.00362881 | 0.26081344 | 0.213887708 | 0.509315467 |
| cg01803461 | 16 | 0.00629918 | 0.22267143 | 0.206818813 | 0.384577107 |
| cg08785317 | 16 | 0.04180327 | 0.22106389 | 0.226124592 | 0.339355916 |
| cg09941601 | 16 | 0.00315582 | 0.2342818  | 0.256690045 | 0.447287831 |
| cg16681649 | 11 | 0.00930715 | 0.61787431 | 0.696938123 | 0.799295522 |
| cg24006667 | 7  | 0.01207774 | 0.2706785  | 0.298402677 | 0.430255289 |
| cg25830548 | 6  | 0.03437206 | 0.23961389 | 0.275407472 | 0.389990449 |
| cg07950220 | 16 | 0.00555806 | 0.17893843 | 0.159660371 | 0.357439614 |
| cg04239863 | 16 | 0.00076471 | 0.28719483 | 0.373664627 | 0.515589036 |
| cg08317243 | 16 | 0.00065949 | 0.61278041 | 0.657305302 | 0.763361292 |
| cg26866349 | 16 | 0.00092661 | 0.64193383 | 0.693095419 | 0.814658235 |
| cg07126126 | 16 | 0.00702537 | 0.54982853 | 0.587140114 | 0.740724433 |
| cg07347205 | 16 | 0.00150458 | 0.20215646 | 0.235611147 | 0.366782686 |
| cg07478240 | 16 | 0.00194569 | 0.19216267 | 0.19754631  | 0.364872813 |
| cg03923640 | 16 | 0.01321271 | 0.19935826 | 0.195882661 | 0.318534548 |
| cg05932560 | 16 | 0.01729366 | 0.20193088 | 0.157810751 | 0.322276736 |
| cg08959182 | 5  | 0.0020562  | 0.51472173 | 0.544275532 | 0.673548874 |
| cg26573923 | 16 | 0.00950438 | 0.42269941 | 0.396416196 | 0.556997589 |
| cg19742687 | 11 | 0.0062271  | 0.31734457 | 0.345537248 | 0.520836389 |
| cg02622846 | 11 | 0.00932052 | 0.39308125 | 0.343517529 | 0.536664525 |
| cg10263737 | 16 | 0.00317466 | 0.34513585 | 0.340708817 | 0.479670671 |
| cg08959094 | 16 | 0.00748137 | 0.28104873 | 0.254274075 | 0.434065664 |
| cg03558269 | 16 | 0.01273892 | 0.2935021  | 0.276814576 | 0.416481445 |
| cg03262260 | 16 | 0.00768774 | 0.24620127 | 0.20467138  | 0.369437366 |
| cg03512577 | 16 | 0.0022496  | 0.22734775 | 0.19308282  | 0.349254999 |
| cg09788978 | 16 | 0.0082702  | 0.32692694 | 0.284509006 | 0.46127073  |
| cg09077862 | 5  | 0.02686466 | 0.20999125 | 0.219352724 | 0.343560778 |
| cg00934299 | 16 | 0.00134295 | 0.44791334 | 0.454837148 | 0.571590008 |
| cg02656871 | 16 | 0.00177922 | 0.19971143 | 0.198751875 | 0.342661686 |
| cg01095004 | 16 | 0.00285469 | 0.27434046 | 0.257046874 | 0.433123929 |
| cg00837308 | 16 | 0.00575247 | 0.56343904 | 0.590830085 | 0.696973202 |
| cg04152616 | 16 | 0.00429038 | 0.15337327 | 0.129118792 | 0.299164598 |
| cg03428314 | 16 | 0.00316669 | 0.25585852 | 0.250109376 | 0.372906858 |
| cg03396664 | 16 | 0.0010144  | 0.34678594 | 0.380748294 | 0.503971441 |
| cg05748238 | 16 | 0.00144751 | 0.41148275 | 0.447882499 | 0.575110932 |
| cg07545858 | 16 | 0.00183809 | 0.32552691 | 0.402723917 | 0.59016669  |
| cg00685614 | 16 | 0.00186737 | 0.20303357 | 0.190601395 | 0.320300166 |
| cg08362283 | 16 | 0.00358374 | 0.19056835 | 0.183104694 | 0.323094811 |
| cg17793497 | 15 | 0.00385922 | 0.27354627 | 0.307330807 | 0.507487638 |
| cg13935765 | 9  | 0.0013522  | 0.51719442 | 0.498951929 | 0.663255899 |
| cg13445230 | 9  | 0.00787909 | 0.18436267 | 0.166460845 | 0.355502631 |
| cg06073695 | 6  | 0.00908024 | 0.39932689 | 0.382042836 | 0.508849187 |
| cg06645120 | 16 | 0.00338706 | 0.56568489 | 0.59254228  | 0.705188352 |

|             |    |            |            |             |             |
|-------------|----|------------|------------|-------------|-------------|
| cg06089606  | 3  | 0.00534171 | 0.24136163 | 0.247932157 | 0.417139091 |
| cg08305808  | 15 | 0.00855208 | 0.21524006 | 0.162077762 | 0.326547422 |
| cg26365847  | 14 | 0.04615769 | 0.4540456  | 0.457544497 | 0.567784532 |
| cg10578701  | 10 | 0.0352175  | 0.21736337 | 0.219079791 | 0.335207202 |
| cg14304674  | 9  | 0.00504019 | 0.38562097 | 0.465962362 | 0.574429502 |
| cg19910940  | 1  | 0.02672791 | 0.36919217 | 0.347255944 | 0.471609203 |
| cg111119301 | 12 | 0.00578285 | 0.15907386 | 0.139827426 | 0.358260463 |
| cg24006770  | 1  | 0.00106082 | 0.35504712 | 0.382117622 | 0.65093961  |
| cg18774857  | 15 | 0.03811638 | 0.21413241 | 0.19668762  | 0.335160073 |
| cg09502464  | 7  | 0.01828536 | 0.22485452 | 0.24438499  | 0.388512751 |
| cg23751171  | 12 | 0.00398606 | 0.29878845 | 0.293233784 | 0.497625221 |
| cg03973379  | 7  | 0.01852917 | 0.31229186 | 0.369866747 | 0.476355551 |
| cg08698198  | 5  | 0.00569156 | 0.24430056 | 0.252314217 | 0.354754456 |
| cg12569007  | 10 | 0.01615583 | 0.16053845 | 0.146236252 | 0.263714008 |
| cg07889827  | 10 | 0.04828533 | 0.3418288  | 0.350995856 | 0.469941453 |
| cg22635041  | 10 | 0.02003798 | 0.45605786 | 0.454434503 | 0.560122966 |
| cg02703145  | 9  | 0.04850545 | 0.21519958 | 0.20507348  | 0.322190694 |
| cg12311651  | 15 | 0.04332612 | 0.39674861 | 0.376012013 | 0.501474549 |
| cg05797224  | 1  | 0.0126518  | 0.12515923 | 0.106353101 | 0.239420497 |
| cg21386766  | 12 | 0.00246645 | 0.40668684 | 0.440633321 | 0.611234571 |
| cg00165078  | 1  | 0.00405622 | 0.48866246 | 0.516789859 | 0.631333414 |
| cg17211890  | 10 | 0.01891899 | 0.66474693 | 0.633400879 | 0.773315976 |
| cg20062681  | 11 | 0.00073265 | 0.31707084 | 0.423326712 | 0.565218438 |
| cg23660866  | 14 | 0.0080158  | 0.25647916 | 0.243923327 | 0.384562097 |
| cg10658307  | 11 | 0.00457044 | 0.18501934 | 0.159242757 | 0.323999283 |
| cg27415425  | 8  | 0.01802754 | 0.44339117 | 0.438672631 | 0.588806053 |
| cg19363785  | 8  | 0.00081925 | 0.40663427 | 0.49434341  | 0.64208435  |
| cg14111437  | 5  | 0.04928347 | 0.18838457 | 0.142269319 | 0.304540574 |
| cg01915328  | 14 | 0.00325899 | 0.12984597 | 0.125344034 | 0.286788505 |
| cg01869093  | 14 | 0.00211366 | 0.17441058 | 0.178468826 | 0.294873312 |
| cg16800228  | 15 | 0.00553981 | 0.67332059 | 0.680271418 | 0.793733563 |
| cg13476964  | 7  | 0.00803433 | 0.56744278 | 0.577855248 | 0.721992577 |
| cg11603201  | 12 | 0.00194981 | 0.67904421 | 0.733766125 | 0.834830376 |
| cg07554408  | 14 | 0.00387834 | 0.17290787 | 0.209284105 | 0.35283376  |
| cg23535322  | 14 | 0.00387229 | 0.28862965 | 0.308200795 | 0.417928681 |
| cg00931957  | 1  | 0.00173751 | 0.51668055 | 0.583510313 | 0.724506605 |
| cg14459158  | 9  | 0.008246   | 0.12877798 | 0.138044515 | 0.245799742 |
| cg03595986  | 8  | 0.02447745 | 0.24532534 | 0.256890694 | 0.414800305 |
| cg25526960  | 10 | 0.00541343 | 0.24867826 | 0.272167854 | 0.430010198 |
| cg21106695  | 14 | 0.01370104 | 0.57659918 | 0.613137089 | 0.730410304 |
| cg18220365  | 1  | 0.01151933 | 0.49424766 | 0.486671248 | 0.626366367 |
| cg26389913  | 12 | 0.04280685 | 0.30554078 | 0.281380788 | 0.416550819 |
| cg06803420  | 5  | 0.00254294 | 0.2336652  | 0.225735024 | 0.475097626 |
| cg14123436  | 9  | 0.00157286 | 0.23105291 | 0.269418299 | 0.500383101 |
| cg14605447  | 9  | 0.00178025 | 0.14171151 | 0.139062491 | 0.282399043 |
| cg26330928  | 1  | 0.02995719 | 0.30761549 | 0.312289914 | 0.453324635 |

|            |    |            |            |             |             |
|------------|----|------------|------------|-------------|-------------|
| cg01655158 | 8  | 0.01004931 | 0.58745654 | 0.601803247 | 0.72370669  |
| cg13520053 | 9  | 0.00642271 | 0.21578291 | 0.240488556 | 0.470475277 |
| cg13280063 | 6  | 0.02683244 | 0.30096718 | 0.299598788 | 0.40886354  |
| cg10421739 | 6  | 0.0016785  | 0.30005394 | 0.367456817 | 0.582682455 |
| cg13463465 | 2  | 0.00716301 | 0.37153957 | 0.385338173 | 0.513170165 |
| cg11806439 | 14 | 0.02433216 | 0.19476664 | 0.175020695 | 0.306470133 |
| cg03548062 | 14 | 0.01083395 | 0.19904672 | 0.196354844 | 0.345846628 |
| cg01194073 | 14 | 0.00685368 | 0.31807277 | 0.304536914 | 0.442245907 |
| cg24707486 | 14 | 0.0194844  | 0.50725596 | 0.486303655 | 0.617721276 |
| cg10506844 | 10 | 0.02822075 | 0.32816137 | 0.279795191 | 0.437437548 |
| cg23856536 | 7  | 0.00070134 | 0.08562304 | 0.135079229 | 0.251579569 |
| cg02019528 | 14 | 0.02673403 | 0.64344978 | 0.631339098 | 0.75040832  |
| cg10548805 | 14 | 0.00092783 | 0.24189127 | 0.278725654 | 0.553413853 |
| cg00881378 | 15 | 0.00382061 | 0.59606836 | 0.576322736 | 0.71093408  |
| cg03991106 | 15 | 0.00240895 | 0.45130566 | 0.457428194 | 0.57337041  |
| cg01099300 | 10 | 0.00810401 | 0.17870954 | 0.163647382 | 0.333126109 |
| cg11782714 | 14 | 0.00147518 | 0.22626883 | 0.244848774 | 0.365370781 |
| cg15337521 | 5  | 0.00177922 | 0.50906942 | 0.549167    | 0.717476553 |
| cg11484721 | 15 | 0.00628685 | 0.27623064 | 0.295358863 | 0.434785078 |
| cg16036584 | 5  | 0.00864245 | 0.30067344 | 0.272617866 | 0.467387278 |
| cg26366958 | 2  | 0.00197007 | 0.42695492 | 0.429027211 | 0.622714871 |
| cg14961690 | 11 | 0.03305066 | 0.29994274 | 0.279902151 | 0.453972692 |
| cg01118348 | 14 | 0.00196477 | 0.29323926 | 0.303685826 | 0.404134805 |
| cg10632966 | 10 | 0.00171661 | 0.60772521 | 0.674017018 | 0.775169649 |
| cg05153781 | 14 | 0.00295256 | 0.23538219 | 0.209588764 | 0.397753976 |
| cg13419345 | 3  | 0.00426429 | 0.35039234 | 0.45818838  | 0.581315252 |
| cg16106254 | 12 | 0.02651696 | 0.20537064 | 0.183050277 | 0.323685804 |
| cg27535538 | 7  | 0.0020154  | 0.4226876  | 0.489870668 | 0.593213791 |
| cg14501119 | 14 | 0.00079224 | 0.23202378 | 0.253663738 | 0.362774146 |
| cg06535003 | 6  | 0.00168532 | 0.09285399 | 0.101136213 | 0.206181142 |
| cg02370923 | 2  | 0.02240881 | 0.23746076 | 0.226815742 | 0.408083206 |
| cg12331004 | 2  | 0.01230099 | 0.27367614 | 0.260220865 | 0.449718877 |
| cg21034034 | 2  | 0.01336583 | 0.20057259 | 0.163081817 | 0.319293653 |
| cg12107466 | 10 | 0.00186404 | 0.46471626 | 0.497884884 | 0.672547993 |
| cg06450976 | 6  | 0.00065949 | 0.56054911 | 0.6807384   | 0.788451697 |
| cg21661768 | 2  | 0.00381594 | 0.12904947 | 0.123170518 | 0.255917032 |
| cg14799129 | 3  | 0.00132756 | 0.44767718 | 0.53326024  | 0.67958548  |
| cg26538335 | 12 | 0.00816896 | 0.40402227 | 0.392518739 | 0.527332529 |
| cg15339026 | 13 | 0.00564684 | 0.14247763 | 0.108250796 | 0.278411748 |
| cg14833024 | 12 | 0.03166005 | 0.23550104 | 0.213727877 | 0.351029695 |
| cg11394820 | 2  | 0.00359037 | 0.28173106 | 0.279472946 | 0.429494145 |
| cg26072561 | 8  | 0.00339056 | 0.34955485 | 0.321007626 | 0.514539003 |
| cg14326909 | 6  | 0.03891003 | 0.34792575 | 0.309965711 | 0.467668202 |
| cg01116425 | 2  | 0.01136421 | 0.2970989  | 0.356735074 | 0.46736525  |
| cg01894366 | 3  | 0.00317432 | 0.14445681 | 0.158620198 | 0.293683542 |
| cg17432647 | 5  | 0.01317683 | 0.34577079 | 0.356909075 | 0.522737004 |

|            |    |            |            |             |             |
|------------|----|------------|------------|-------------|-------------|
| cg12369091 | 12 | 0.00410164 | 0.35995101 | 0.417922538 | 0.532317301 |
| cg26699655 | 11 | 0.02110372 | 0.21055047 | 0.183440061 | 0.334606604 |
| cg26575105 | 6  | 0.00591291 | 0.38596995 | 0.387652822 | 0.501923195 |
| cg11073813 | 6  | 0.0037804  | 0.22296312 | 0.186247379 | 0.367265396 |
| cg17635080 | 12 | 0.0016682  | 0.32865458 | 0.376187094 | 0.542003387 |
| cg09907439 | 12 | 0.01398885 | 0.38396486 | 0.365576801 | 0.489984099 |
| cg08055994 | 2  | 0.01398885 | 0.43081916 | 0.41735868  | 0.570191373 |
| cg04690342 | 2  | 0.03829642 | 0.26373293 | 0.208789797 | 0.381291886 |
| cg12389397 | 1  | 0.00150566 | 0.39001739 | 0.414338495 | 0.587991427 |
| cg10624395 | 11 | 0.02614058 | 0.26256196 | 0.218526668 | 0.380643565 |
| cg10088622 | 1  | 0.01465218 | 0.14371082 | 0.125639265 | 0.271514802 |
| cg19699170 | 2  | 0.0013643  | 0.29855612 | 0.337574278 | 0.487553614 |
| cg25508181 | 5  | 0.02757672 | 0.14761121 | 0.150732697 | 0.258859218 |
| cg08374552 | 5  | 0.00233476 | 0.36222628 | 0.407074083 | 0.553548533 |
| cg01885839 | 5  | 0.04685951 | 0.52608196 | 0.550004481 | 0.655844659 |
| cg19629079 | 12 | 0.00999043 | 0.30543305 | 0.320447831 | 0.482785591 |
| cg13235891 | 12 | 0.00491882 | 0.15211403 | 0.146661024 | 0.257318308 |
| cg06918928 | 12 | 0.01358672 | 0.21951037 | 0.211989331 | 0.323130398 |
| cg22725830 | 13 | 0.0048909  | 0.32119043 | 0.327362545 | 0.483114503 |
| cg01552748 | 13 | 0.00619212 | 0.61777284 | 0.595300851 | 0.718820925 |
| cg24360892 | 13 | 0.00403972 | 0.23104451 | 0.257680162 | 0.36898862  |
| cg18712566 | 13 | 0.00753069 | 0.37177386 | 0.409860198 | 0.545705691 |
| cg04853995 | 12 | 0.01585898 | 0.34376105 | 0.421327768 | 0.528411524 |
| cg14060417 | 12 | 0.00993335 | 0.33249959 | 0.349021258 | 0.544818792 |
| cg13063274 | 3  | 0.00555806 | 0.2432292  | 0.237728553 | 0.471929623 |
| cg19763682 | 13 | 0.0016785  | 0.470498   | 0.478446267 | 0.631635787 |
| cg19649152 | 13 | 0.01116167 | 0.39356235 | 0.371429148 | 0.501852441 |
| cg25114855 | 2  | 0.0015244  | 0.65494915 | 0.629449168 | 0.797238474 |
| cg03743262 | 7  | 0.00368022 | 0.17918499 | 0.202352183 | 0.348644212 |
| cg24030485 | 13 | 0.00798815 | 0.34927689 | 0.359780769 | 0.511920416 |
| cg22122342 | 13 | 0.02823023 | 0.67632985 | 0.692535901 | 0.814204515 |
| cg11707796 | 13 | 0.00434915 | 0.30287488 | 0.2852132   | 0.432257205 |
| cg19129687 | 13 | 0.0035878  | 0.47989188 | 0.508503491 | 0.610057186 |
| cg13099542 | 13 | 0.02655172 | 0.53962717 | 0.583206187 | 0.701187848 |
| cg26655004 | 13 | 0.00775794 | 0.73428073 | 0.703850209 | 0.845650571 |
| cg22484690 | 1  | 0.00330705 | 0.61079211 | 0.622353449 | 0.737682474 |
| cg21408197 | 2  | 0.01596342 | 0.17468479 | 0.158286927 | 0.333169006 |
| cg02305412 | 1  | 0.03615697 | 0.42203323 | 0.409988582 | 0.566082517 |
| cg23591463 | 12 | 0.0011141  | 0.09411351 | 0.139415509 | 0.258500042 |
| cg01184975 | 12 | 0.00084118 | 0.07502445 | 0.132396558 | 0.242537956 |
| cg20249252 | 12 | 0.00149569 | 0.11434965 | 0.186058882 | 0.306813383 |
| cg03104083 | 12 | 0.00762625 | 0.21907718 | 0.267679395 | 0.40672593  |
| cg00386586 | 13 | 0.04042709 | 0.49314286 | 0.50062928  | 0.602700338 |
| cg13697968 | 13 | 0.00629918 | 0.34791528 | 0.348282842 | 0.498566567 |
| cg02332936 | 9  | 0.02050584 | 0.32602244 | 0.265823404 | 0.497846797 |
| cg06482783 | 5  | 0.01485881 | 0.6773159  | 0.675259273 | 0.784625509 |

|            |    |            |            |             |             |
|------------|----|------------|------------|-------------|-------------|
| cg15203566 | 5  | 0.00111524 | 0.26433851 | 0.251558617 | 0.383127726 |
| cg12551394 | 12 | 0.00151706 | 0.47645221 | 0.485314191 | 0.651436527 |
| cg25109508 | 1  | 0.00658287 | 0.22292742 | 0.169115511 | 0.346540535 |
| cg07148025 | 5  | 0.0035878  | 0.15917966 | 0.135763672 | 0.304922493 |
| cg01792876 | 8  | 0.02385226 | 0.19367137 | 0.224136367 | 0.360794917 |
| cg19576241 | 12 | 0.02075001 | 0.14833682 | 0.149217483 | 0.26693334  |
| cg13645530 | 12 | 0.00337574 | 0.16919916 | 0.163443761 | 0.3016802   |
| cg01558281 | 1  | 0.01064534 | 0.26174316 | 0.231122952 | 0.38406007  |
| cg13761419 | 9  | 0.00276502 | 0.10455479 | 0.120745417 | 0.222907288 |
| cg20637688 | 12 | 0.00747631 | 0.47546176 | 0.500336782 | 0.626542171 |
| cg04962865 | 8  | 0.00521564 | 0.14739833 | 0.174855155 | 0.364757768 |
| cg15317129 | 3  | 0.00725763 | 0.59506074 | 0.527758718 | 0.721573504 |
| cg22138219 | 8  | 0.0070758  | 0.50316456 | 0.567359645 | 0.677196122 |
| cg01536979 | 8  | 0.01614766 | 0.26226476 | 0.21227673  | 0.369038249 |
| cg20366218 | 2  | 0.03585699 | 0.50480396 | 0.511042243 | 0.624744837 |
| cg13796936 | 1  | 0.00167443 | 0.19220421 | 0.205357181 | 0.424751308 |
| cg26120971 | 8  | 0.00377759 | 0.22796721 | 0.237727357 | 0.37138031  |
| cg20778022 | 7  | 0.00203938 | 0.54174323 | 0.579204979 | 0.715908357 |
| cg16600876 | 8  | 0.04638176 | 0.31421294 | 0.269042524 | 0.441428759 |
| cg27551395 | 1  | 0.00368543 | 0.55913987 | 0.469208323 | 0.686817893 |
| cg09221960 | 11 | 0.00259677 | 0.53467869 | 0.517043937 | 0.649753574 |
| cg23340777 | 12 | 0.0012838  | 0.21619136 | 0.272349432 | 0.494006401 |
| cg27310831 | 8  | 0.00181052 | 0.55871239 | 0.595054052 | 0.700946607 |
| cg25306875 | 2  | 0.00540086 | 0.32168151 | 0.273028078 | 0.487428947 |
| cg26373051 | 2  | 0.00111281 | 0.15802658 | 0.192048446 | 0.359127044 |
| cg00637745 | 2  | 0.00077454 | 0.12490469 | 0.157293757 | 0.272516427 |
| cg17870997 | 2  | 0.00166583 | 0.31849301 | 0.345893545 | 0.513712458 |
| cg18097872 | 2  | 0.00122881 | 0.31449172 | 0.359178292 | 0.484410002 |
| cg15699099 | 2  | 0.00131467 | 0.26993    | 0.297482206 | 0.526507387 |
| cg14658300 | 5  | 0.00583531 | 0.56526291 | 0.590660541 | 0.709836016 |
| cg23834919 | 11 | 0.01359116 | 0.13090189 | 0.121332739 | 0.246097858 |
| cg04522792 | 8  | 0.01172344 | 0.19645487 | 0.146882328 | 0.331617194 |
| cg14256511 | 12 | 0.00081925 | 0.45975997 | 0.544045438 | 0.692801342 |
| cg24571086 | 10 | 0.00432931 | 0.3097893  | 0.269684183 | 0.455367631 |
| cg08349093 | 10 | 0.00971274 | 0.32563684 | 0.335377856 | 0.469987359 |
| cg08211704 | 8  | 0.00091907 | 0.46904392 | 0.571829614 | 0.681238021 |
| cg22959827 | 5  | 0.0086963  | 0.43115808 | 0.482213335 | 0.592886383 |
| cg25051510 | 12 | 0.00134844 | 0.34184029 | 0.374878213 | 0.53084784  |
| cg23400222 | 5  | 0.0249821  | 0.24281525 | 0.265928331 | 0.376140174 |
| cg25024515 | 12 | 0.01980843 | 0.29872447 | 0.253825612 | 0.470581198 |
| cg18648169 | 12 | 0.0016785  | 0.24356243 | 0.226491924 | 0.369048162 |
| cg12277789 | 10 | 0.00240097 | 0.28612638 | 0.308223118 | 0.496998219 |
| cg11846355 | 12 | 0.00219711 | 0.61743591 | 0.603851408 | 0.722788237 |
| cg02807786 | 12 | 0.00356915 | 0.51219294 | 0.516542065 | 0.681734358 |
| cg11818127 | 12 | 0.00140062 | 0.15913153 | 0.152501637 | 0.298362481 |
| cg24691330 | 8  | 0.00589429 | 0.52080229 | 0.549597614 | 0.695166279 |

|            |    |            |            |             |             |
|------------|----|------------|------------|-------------|-------------|
| cg04658679 | 12 | 0.00733128 | 0.23724065 | 0.287063908 | 0.471924659 |
| cg09789874 | 12 | 0.00081925 | 0.07677797 | 0.114414891 | 0.225383568 |
| cg15226808 | 6  | 0.00318584 | 0.57092527 | 0.599598432 | 0.724830542 |
| cg14267222 | 10 | 0.02252087 | 0.22338173 | 0.204223366 | 0.32935178  |
| cg03464765 | 11 | 0.0020562  | 0.49155062 | 0.545418956 | 0.732260878 |
| cg10903132 | 10 | 0.00989055 | 0.59120775 | 0.539993999 | 0.698457125 |
| cg05872570 | 10 | 0.00119385 | 0.65466739 | 0.681092585 | 0.796980684 |
| cg21392435 | 8  | 0.0007088  | 0.27732029 | 0.339937603 | 0.458461139 |
| cg27031099 | 8  | 0.0008696  | 0.09013946 | 0.118769094 | 0.225872596 |
| cg26781392 | 6  | 0.00459107 | 0.48410515 | 0.454922773 | 0.662582961 |
| cg05165087 | 5  | 0.0104642  | 0.20676852 | 0.243833776 | 0.354036276 |
| cg10522535 | 11 | 0.03431393 | 0.43927141 | 0.44523598  | 0.583048454 |
| cg19153828 | 2  | 0.00286125 | 0.18701561 | 0.165184791 | 0.297540611 |
| cg25214552 | 4  | 0.02045637 | 0.18592792 | 0.203627931 | 0.339623135 |
| cg23756265 | 11 | 0.00065949 | 0.29704759 | 0.390515807 | 0.58040694  |
| cg23487517 | 11 | 0.01358672 | 0.20378011 | 0.190367906 | 0.357555707 |
| cg06521347 | 8  | 0.0104642  | 0.3342723  | 0.421337239 | 0.532463404 |
| cg01571001 | 3  | 0.00960362 | 0.22125318 | 0.198110881 | 0.343707718 |
| cg21121082 | 11 | 0.00620216 | 0.21179797 | 0.176959398 | 0.419142696 |
| cg10334741 | 11 | 0.00789188 | 0.22197509 | 0.162627089 | 0.328834972 |
| cg15010140 | 2  | 0.01172466 | 0.51128297 | 0.493911065 | 0.639454546 |
| cg17297696 | 11 | 0.01159673 | 0.61298362 | 0.678946744 | 0.800975946 |
| cg02148562 | 8  | 0.00362881 | 0.18826935 | 0.192593956 | 0.319264618 |
| cg02433979 | 7  | 0.0018345  | 0.21945797 | 0.25119294  | 0.406702838 |
| cg18261434 | 2  | 0.00243028 | 0.64276659 | 0.681051573 | 0.781833356 |
| cg10149870 | 2  | 0.04928347 | 0.22234037 | 0.201638345 | 0.346772642 |
| cg21875839 | 2  | 0.01390012 | 0.59642606 | 0.582042799 | 0.702627387 |
| cg13807254 | 9  | 0.01384967 | 0.19296128 | 0.176373776 | 0.309065271 |
| cg01935436 | 7  | 0.01842724 | 0.1823584  | 0.153547519 | 0.288798948 |
| cg10985970 | 11 | 0.00086166 | 0.52228835 | 0.583225061 | 0.707489157 |
| cg12441957 | 10 | 0.0194844  | 0.22900164 | 0.19893271  | 0.32994509  |
| cg23858650 | 12 | 0.00917376 | 0.24497388 | 0.210749394 | 0.376080309 |
| cg02506248 | 12 | 0.02076533 | 0.29254066 | 0.261271678 | 0.407811155 |
| cg23653492 | 12 | 0.01116167 | 0.28772449 | 0.279953153 | 0.468213794 |
| cg04879750 | 12 | 0.0042711  | 0.25404514 | 0.235130133 | 0.380224368 |
| cg02642891 | 10 | 0.01218672 | 0.52598977 | 0.468146402 | 0.630942143 |
| cg08372212 | 10 | 0.00937465 | 0.40824871 | 0.29431786  | 0.526207301 |
| cg16864819 | 11 | 0.00161582 | 0.41558318 | 0.47516734  | 0.651546274 |
| cg01231009 | 8  | 0.00103808 | 0.52986648 | 0.593600633 | 0.71113107  |
| cg02506275 | 12 | 0.02158529 | 0.50204365 | 0.479835603 | 0.619133696 |
| cg13391028 | 11 | 0.00758361 | 0.17374285 | 0.149108077 | 0.312114799 |
| cg19030317 | 11 | 0.00827092 | 0.74685202 | 0.735309637 | 0.857066188 |
| cg11584284 | 6  | 0.00103447 | 0.59344101 | 0.645331153 | 0.757677264 |
| cg14101442 | 11 | 0.00252833 | 0.27905412 | 0.278634948 | 0.529464471 |
| cg14549841 | 12 | 0.01174797 | 0.46134594 | 0.495328821 | 0.602705178 |
| cg19248958 | 10 | 0.00352201 | 0.51292589 | 0.57009355  | 0.723914493 |

|            |    |            |            |             |             |
|------------|----|------------|------------|-------------|-------------|
| cg03598731 | 8  | 0.01823439 | 0.28771218 | 0.259102854 | 0.389272631 |
| cg17451493 | 10 | 0.00462969 | 0.60578285 | 0.571660463 | 0.722298587 |
| cg14360029 | 9  | 0.00310772 | 0.16366517 | 0.146878366 | 0.31169958  |
| cg26843278 | 10 | 0.00589429 | 0.45455423 | 0.45032495  | 0.591212969 |
| cg12474686 | 10 | 0.00431388 | 0.62986565 | 0.628309888 | 0.761939011 |
| cg11826295 | 10 | 0.00233284 | 0.46755071 | 0.412980342 | 0.585102407 |
| cg19198993 | 12 | 0.00815824 | 0.31578933 | 0.3441158   | 0.450241982 |
| cg08601192 | 10 | 0.02336655 | 0.56170248 | 0.582407    | 0.697035145 |
| cg14623910 | 12 | 0.0023187  | 0.52594719 | 0.551619684 | 0.651938492 |
| cg14145524 | 9  | 0.00368543 | 0.23768049 | 0.213340558 | 0.339731783 |
| cg13253210 | 10 | 0.00296695 | 0.25213519 | 0.246377821 | 0.431532877 |
| cg03371778 | 10 | 0.00594443 | 0.48433211 | 0.399917912 | 0.599563881 |
| cg20824932 | 6  | 0.00312811 | 0.15025351 | 0.152347819 | 0.287894012 |
| cg19546792 | 10 | 0.00150075 | 0.60228237 | 0.59665871  | 0.730497108 |
| cg02862059 | 10 | 0.0097133  | 0.52124336 | 0.520693213 | 0.62894971  |
| cg01205299 | 6  | 0.00727686 | 0.47475458 | 0.510408884 | 0.628343359 |
| cg23200818 | 12 | 0.00169055 | 0.23297947 | 0.240270374 | 0.379099443 |
| cg26415787 | 12 | 0.00411612 | 0.24693711 | 0.21855096  | 0.405377996 |
| cg04847478 | 10 | 0.0012838  | 0.62016589 | 0.650656467 | 0.770701727 |
| cg13406593 | 9  | 0.00489904 | 0.26107782 | 0.274504885 | 0.411582205 |
| cg07593205 | 10 | 0.00396544 | 0.20542895 | 0.18860891  | 0.354529112 |
| cg09505233 | 10 | 0.00798815 | 0.42028566 | 0.405633687 | 0.609203257 |
| cg00753748 | 3  | 0.02708404 | 0.36283007 | 0.391710617 | 0.502935482 |
| cg08452095 | 3  | 0.00262388 | 0.48518471 | 0.523347435 | 0.650116287 |
| cg24794669 | 10 | 0.00174311 | 0.41685929 | 0.464259577 | 0.573397618 |
| cg08981844 | 8  | 0.01007472 | 0.16581116 | 0.179355057 | 0.291353509 |
| cg00402352 | 11 | 0.00986554 | 0.45340811 | 0.4337303   | 0.564318595 |
| cg24692595 | 3  | 0.00230867 | 0.46316382 | 0.60697552  | 0.720265277 |
| cg18121989 | 8  | 0.00227742 | 0.13985667 | 0.147383739 | 0.289560676 |
| cg11929693 | 5  | 0.00276502 | 0.55909729 | 0.510375151 | 0.728556518 |
| cg08954863 | 10 | 0.00309798 | 0.54208551 | 0.49219005  | 0.657583938 |
| cg20824201 | 2  | 0.00354346 | 0.31862655 | 0.345371221 | 0.515545582 |
| cg20595634 | 10 | 0.00787799 | 0.30509763 | 0.331190295 | 0.44055557  |
| cg16139202 | 5  | 0.00890116 | 0.25860903 | 0.222750191 | 0.385720926 |
| cg18992570 | 5  | 0.00736707 | 0.31024208 | 0.271891327 | 0.446413933 |
| cg18682731 | 10 | 0.01786937 | 0.29008391 | 0.267830855 | 0.411916954 |
| cg14107822 | 6  | 0.01532682 | 0.5686528  | 0.587632923 | 0.688012695 |
| cg24680439 | 10 | 0.02692184 | 0.35280096 | 0.475381924 | 0.588830354 |
| cg19958511 | 10 | 0.01088059 | 0.44773193 | 0.455862729 | 0.588863619 |
| cg20481247 | 10 | 0.00174311 | 0.51353175 | 0.535784067 | 0.69986575  |
| cg26509250 | 2  | 0.00456818 | 0.43660574 | 0.508719558 | 0.62890769  |
| cg11368900 | 10 | 0.01207774 | 0.5928704  | 0.625662594 | 0.729316594 |
| cg06139749 | 7  | 0.00099274 | 0.18707192 | 0.203825436 | 0.437153288 |
| cg02516703 | 5  | 0.00398122 | 0.36600114 | 0.388280438 | 0.551065488 |
| cg02490659 | 9  | 0.00325899 | 0.27567223 | 0.288190016 | 0.426384435 |
| cg02654265 | 5  | 0.01019185 | 0.5425314  | 0.556517182 | 0.6752625   |



|            |   |            |            |             |             |
|------------|---|------------|------------|-------------|-------------|
| cg13429168 | 9 | 0.00359124 | 0.30571558 | 0.299971046 | 0.435373544 |
| cg14402385 | 9 | 0.0048909  | 0.24696571 | 0.234070386 | 0.35433087  |
| cg02204521 | 2 | 0.00279442 | 0.11568878 | 0.156387216 | 0.290753981 |
| cg14463995 | 9 | 0.00430896 | 0.2821115  | 0.271609462 | 0.47481381  |
| cg07879474 | 5 | 0.0121837  | 0.28742058 | 0.275139765 | 0.430220848 |
| cg08819431 | 5 | 0.00357923 | 0.12866774 | 0.112373014 | 0.280327949 |
| cg11698445 | 5 | 0.00299125 | 0.17066291 | 0.15871459  | 0.375817676 |
| cg15942368 | 7 | 0.00429383 | 0.35877707 | 0.400834672 | 0.609825916 |
| cg00271204 | 5 | 0.00145997 | 0.3158604  | 0.30261929  | 0.499813128 |
| cg14130595 | 9 | 0.00205947 | 0.21726611 | 0.205485295 | 0.351418913 |
| cg18631996 | 5 | 0.00073118 | 0.18905753 | 0.267955909 | 0.387160523 |
| cg13534503 | 9 | 0.00221105 | 0.68391286 | 0.59865878  | 0.790234135 |
| cg21924472 | 4 | 0.0007901  | 0.42104109 | 0.457336566 | 0.595583115 |
| cg15224626 | 6 | 0.00419259 | 0.47524915 | 0.57237575  | 0.679865505 |
| cg12418043 | 5 | 0.01317683 | 0.41278084 | 0.403551314 | 0.54557148  |
| cg27411547 | 8 | 0.00249468 | 0.66909622 | 0.618331362 | 0.815480015 |
| cg16927416 | 8 | 0.00065949 | 0.31474983 | 0.361473834 | 0.49279169  |
| cg06575772 | 8 | 0.00068904 | 0.49101238 | 0.55603516  | 0.707751668 |
| cg24134292 | 8 | 0.01334709 | 0.19769746 | 0.231841402 | 0.339632317 |
| cg08918272 | 6 | 0.036552   | 0.18205883 | 0.142097027 | 0.321059338 |
| cg15171155 | 3 | 0.00247655 | 0.50796224 | 0.547228912 | 0.692223038 |
| cg26472326 | 5 | 0.00217021 | 0.25168766 | 0.374240116 | 0.477110611 |
| cg07531093 | 8 | 0.01191142 | 0.21049336 | 0.178093564 | 0.350783884 |
| cg15554023 | 1 | 0.00422785 | 0.17722108 | 0.180113117 | 0.288116371 |
| cg10276948 | 8 | 0.00576931 | 0.43656962 | 0.43054341  | 0.547101529 |
| cg06993255 | 8 | 0.00207081 | 0.29446766 | 0.296241717 | 0.415112938 |
| cg06228407 | 2 | 0.00113894 | 0.35095555 | 0.356341373 | 0.646056892 |
| cg15983072 | 2 | 0.00341932 | 0.35246249 | 0.461574543 | 0.573402224 |
| cg08508936 | 5 | 0.00971274 | 0.43369691 | 0.441612542 | 0.55235836  |
| cg18879198 | 2 | 0.00179741 | 0.36153484 | 0.394957146 | 0.540210566 |
| cg03577128 | 3 | 0.03181424 | 0.60714551 | 0.601698952 | 0.714740038 |
| cg04293770 | 5 | 0.00777499 | 0.54490524 | 0.601810143 | 0.7233925   |
| cg06192592 | 6 | 0.00315576 | 0.19519096 | 0.244382815 | 0.365153255 |
| cg23623851 | 3 | 0.00275807 | 0.29691295 | 0.278569929 | 0.421917971 |
| cg25601481 | 6 | 0.00349732 | 0.42230424 | 0.373764972 | 0.54205868  |
| cg14548047 | 5 | 0.00118039 | 0.11872972 | 0.138238386 | 0.244115791 |
| cg11286742 | 3 | 0.00164763 | 0.52965499 | 0.585597708 | 0.739423915 |
| cg06636220 | 3 | 0.00608941 | 0.56968818 | 0.543736589 | 0.680181302 |
| cg00927503 | 2 | 0.00081925 | 0.52910032 | 0.616534953 | 0.767474965 |
| cg21072457 | 5 | 0.00767399 | 0.59575631 | 0.572348108 | 0.70252678  |
| cg09578620 | 2 | 0.00269197 | 0.24398636 | 0.204791494 | 0.431839884 |
| cg10476950 | 7 | 0.00189311 | 0.57373878 | 0.608230141 | 0.771042519 |
| cg13074572 | 7 | 0.00575746 | 0.53577179 | 0.549210204 | 0.684341582 |
| cg12207367 | 2 | 0.00291636 | 0.16908553 | 0.169893544 | 0.376792974 |
| cg06883206 | 4 | 0.00150566 | 0.23408169 | 0.24868524  | 0.359700336 |
| cg20957370 | 5 | 0.0078101  | 0.29712119 | 0.347577951 | 0.463159032 |

|            |   |            |            |             |             |
|------------|---|------------|------------|-------------|-------------|
| cg04095226 | 6 | 0.00186758 | 0.32518296 | 0.469952648 | 0.584709527 |
| cg23409007 | 6 | 0.00423787 | 0.54240827 | 0.42019024  | 0.712176161 |
| cg00423598 | 7 | 0.00368593 | 0.32577237 | 0.352640019 | 0.492572513 |
| cg23786812 | 7 | 0.02757672 | 0.50607631 | 0.523251181 | 0.636267882 |
| cg12159689 | 7 | 0.00716301 | 0.55220818 | 0.56120053  | 0.66632113  |
| cg01942797 | 7 | 0.00451843 | 0.21568581 | 0.222394507 | 0.343271322 |
| cg05711023 | 3 | 0.00938113 | 0.6532918  | 0.639437647 | 0.780093849 |
| cg05225634 | 6 | 0.00694471 | 0.33372454 | 0.3036352   | 0.457149609 |
| cg09056876 | 6 | 0.01206679 | 0.25407752 | 0.220896327 | 0.369815876 |
| cg04127867 | 7 | 0.00109306 | 0.47003348 | 0.478171534 | 0.633399099 |
| cg02627405 | 5 | 0.00065949 | 0.64046043 | 0.694752504 | 0.798142401 |
| cg19891924 | 5 | 0.0017637  | 0.15304399 | 0.159508555 | 0.295327213 |
| cg00637940 | 7 | 0.01760022 | 0.2552121  | 0.264104661 | 0.39632336  |
| cg24455158 | 7 | 0.02078916 | 0.56958254 | 0.56923118  | 0.710343342 |
| cg09426420 | 7 | 0.02680775 | 0.52858494 | 0.537069544 | 0.665461979 |
| cg20462493 | 5 | 0.0015244  | 0.27780324 | 0.310202204 | 0.556891425 |
| cg10525394 | 6 | 0.00101436 | 0.38916566 | 0.411032674 | 0.558310758 |
| cg02962647 | 6 | 0.00176816 | 0.45509253 | 0.448330128 | 0.587741605 |
| cg25575845 | 7 | 0.0097133  | 0.44855022 | 0.45358163  | 0.590534327 |
| cg00089966 | 5 | 0.01120433 | 0.16994179 | 0.180859666 | 0.284406186 |
| cg25256538 | 6 | 0.02489039 | 0.39565456 | 0.38594308  | 0.500780359 |
| cg18672053 | 5 | 0.01863458 | 0.48270447 | 0.48649186  | 0.606797254 |
| cg00730887 | 4 | 0.03634588 | 0.16303454 | 0.161588635 | 0.276764076 |
| cg12684999 | 2 | 0.00359124 | 0.30543369 | 0.298773481 | 0.457317566 |
| cg25232786 | 3 | 0.01310065 | 0.56711661 | 0.574746452 | 0.740549054 |
| cg25116792 | 3 | 0.00122621 | 0.65705358 | 0.505198254 | 0.761173779 |
| cg18200075 | 1 | 0.00561533 | 0.3430575  | 0.350825789 | 0.493494787 |
| cg18758281 | 2 | 0.02249063 | 0.22667176 | 0.208675123 | 0.375200084 |
| cg03662049 | 2 | 0.00336646 | 0.23541113 | 0.202807084 | 0.339725524 |
| cg15584084 | 4 | 0.02562377 | 0.35360913 | 0.384350207 | 0.542940351 |
| cg16163174 | 6 | 0.00118039 | 0.33604158 | 0.408436817 | 0.599228923 |
| cg21413947 | 1 | 0.02205285 | 0.47852448 | 0.515372464 | 0.624320001 |
| cg10932916 | 5 | 0.0090396  | 0.31374268 | 0.402167277 | 0.502846707 |
| cg23172911 | 1 | 0.00209654 | 0.16274801 | 0.148922723 | 0.343429096 |
| cg16206344 | 6 | 0.00798815 | 0.3289044  | 0.356989375 | 0.516145458 |
| cg21464704 | 6 | 0.03208015 | 0.20144837 | 0.152943889 | 0.301933251 |
| cg15403758 | 4 | 0.02096205 | 0.50785751 | 0.54620185  | 0.664445665 |
| cg24603922 | 6 | 0.00363129 | 0.4453251  | 0.437296453 | 0.547342686 |
| cg23863157 | 4 | 0.01016149 | 0.35928696 | 0.342840598 | 0.525887172 |
| cg03474525 | 6 | 0.02697984 | 0.3961901  | 0.429693877 | 0.569118942 |
| cg14705155 | 6 | 0.00566397 | 0.40242834 | 0.368936575 | 0.517146972 |
| cg06389605 | 6 | 0.01155671 | 0.24155167 | 0.226279391 | 0.38619014  |
| cg03703733 | 6 | 0.00362881 | 0.44953518 | 0.551057659 | 0.670505225 |
| cg18469813 | 6 | 0.00247734 | 0.32603073 | 0.400313842 | 0.526707296 |
| cg22049902 | 6 | 0.02917135 | 0.67968886 | 0.659899593 | 0.793423641 |
| cg03994717 | 6 | 0.00218799 | 0.21322064 | 0.18332626  | 0.380156877 |

|            |   |            |            |             |             |
|------------|---|------------|------------|-------------|-------------|
| cg05315633 | 6 | 0.00538453 | 0.16221604 | 0.160921625 | 0.287224924 |
| cg20735682 | 6 | 0.00382061 | 0.35980541 | 0.3942862   | 0.496202412 |
| cg14462369 | 6 | 0.0047687  | 0.30802413 | 0.324602566 | 0.48953637  |
| cg10075004 | 6 | 0.03576735 | 0.49919868 | 0.525584813 | 0.642923842 |
| cg05184395 | 6 | 0.00670577 | 0.1604286  | 0.134606692 | 0.27618211  |
| cg05740106 | 6 | 0.00458537 | 0.72958914 | 0.760618866 | 0.862883594 |
| cg02383285 | 6 | 0.00214604 | 0.20728181 | 0.233776645 | 0.386849883 |
| cg10122103 | 6 | 0.00299824 | 0.26235023 | 0.247381277 | 0.369341284 |
| cg09867546 | 6 | 0.00431293 | 0.25746326 | 0.237697045 | 0.450870551 |
| cg12201544 | 6 | 0.00088355 | 0.26003205 | 0.323550418 | 0.513301752 |
| cg17017878 | 6 | 0.00081925 | 0.18441212 | 0.206306205 | 0.486198567 |
| cg23253674 | 6 | 0.00103447 | 0.33091099 | 0.377297135 | 0.607395044 |
| cg24148931 | 6 | 0.02152265 | 0.69554755 | 0.707090308 | 0.809369528 |
| cg08672919 | 6 | 0.00079512 | 0.25136328 | 0.342617478 | 0.523799043 |
| cg23180941 | 5 | 0.00211366 | 0.71720061 | 0.692678479 | 0.820380493 |
| cg24527591 | 3 | 0.03744929 | 0.27117449 | 0.264022257 | 0.371321335 |
| cg13207606 | 6 | 0.00144365 | 0.64748837 | 0.694835776 | 0.797746164 |
| cg07140792 | 5 | 0.00337574 | 0.09839794 | 0.103950959 | 0.209412167 |
| cg00532399 | 5 | 0.02068126 | 0.35454925 | 0.379550203 | 0.500856715 |
| cg17393083 | 3 | 0.0019957  | 0.18757038 | 0.175703135 | 0.473073396 |
| cg08371532 | 5 | 0.00385922 | 0.24433719 | 0.275601986 | 0.385046529 |
| cg20683802 | 5 | 0.00561533 | 0.33492444 | 0.349659935 | 0.498259548 |
| cg24720604 | 5 | 0.02919075 | 0.21533678 | 0.179313214 | 0.322863559 |
| cg14524724 | 5 | 0.00332795 | 0.16038063 | 0.160450569 | 0.291871578 |
| cg16213787 | 2 | 0.00262388 | 0.15117777 | 0.165542017 | 0.394200536 |
| cg01418539 | 2 | 0.00768774 | 0.12586214 | 0.116452153 | 0.232644611 |
| cg25912037 | 2 | 0.01612589 | 0.23526331 | 0.175195338 | 0.352718844 |
| cg22992137 | 2 | 0.00476647 | 0.52602742 | 0.539649819 | 0.686397395 |
| cg21748138 | 2 | 0.00483687 | 0.50968349 | 0.525956558 | 0.642698341 |
| cg00688246 | 3 | 0.00344535 | 0.12662349 | 0.138211346 | 0.301635966 |
| cg18607127 | 5 | 0.00428303 | 0.40827922 | 0.430634163 | 0.547718374 |
| cg00075103 | 3 | 0.0096307  | 0.17112163 | 0.190636331 | 0.293994394 |
| cg20187173 | 3 | 0.00816896 | 0.14614406 | 0.124217948 | 0.309918611 |
| cg10541663 | 3 | 0.00782077 | 0.30597414 | 0.263027965 | 0.48432325  |
| cg25925252 | 5 | 0.0071227  | 0.3062936  | 0.306681762 | 0.4219244   |
| cg09267467 | 1 | 0.00330705 | 0.18844737 | 0.178006489 | 0.325765152 |
| cg07535366 | 5 | 0.00112679 | 0.6078162  | 0.625962573 | 0.734460878 |
| cg21188409 | 3 | 0.0012838  | 0.2913761  | 0.305712951 | 0.517683928 |
| cg24990255 | 2 | 0.00379486 | 0.33790729 | 0.275970019 | 0.495939275 |
| cg01549525 | 1 | 0.02445578 | 0.2551065  | 0.274244772 | 0.38142001  |
| cg10152627 | 3 | 0.01329482 | 0.26684215 | 0.283126843 | 0.383938596 |
| cg13460850 | 3 | 0.00340195 | 0.20161593 | 0.258077087 | 0.390343108 |
| cg07467854 | 3 | 0.01502763 | 0.1847996  | 0.150634958 | 0.303926633 |
| cg16893634 | 3 | 0.00141699 | 0.16196737 | 0.178550622 | 0.329562682 |
| cg00432953 | 3 | 0.01077982 | 0.31844703 | 0.377443574 | 0.51180268  |
| cg22607164 | 3 | 0.0082702  | 0.20422825 | 0.166536864 | 0.307083927 |

|            |   |            |            |             |             |
|------------|---|------------|------------|-------------|-------------|
| cg16510460 | 3 | 0.00309973 | 0.18796939 | 0.190385706 | 0.291829629 |
| cg00163089 | 1 | 0.00133251 | 0.13790151 | 0.14038229  | 0.27855613  |
| cg25556051 | 4 | 0.01073914 | 0.39711912 | 0.428365879 | 0.583597019 |
| cg12354056 | 3 | 0.00387438 | 0.38763818 | 0.424346193 | 0.565810931 |
| cg01394884 | 4 | 0.00297384 | 0.16285431 | 0.168658169 | 0.333380435 |
| cg27338202 | 3 | 0.02265145 | 0.12758713 | 0.12203584  | 0.227964798 |
| cg12626957 | 3 | 0.0022985  | 0.11816412 | 0.107907001 | 0.233298467 |
| cg15813266 | 4 | 0.00227742 | 0.72339688 | 0.744371363 | 0.849102354 |
| cg00317585 | 4 | 0.00279494 | 0.34959565 | 0.356860343 | 0.502095116 |
| cg21351437 | 4 | 0.00471011 | 0.29051539 | 0.337973799 | 0.489249527 |
| cg13755270 | 3 | 0.00076471 | 0.18801798 | 0.234943712 | 0.443583587 |
| cg05782966 | 2 | 0.01317021 | 0.5675965  | 0.564622352 | 0.697074309 |
| cg03055271 | 1 | 0.03161897 | 0.41178404 | 0.351831047 | 0.520173312 |
| cg03209398 | 2 | 0.00689691 | 0.21228808 | 0.181685652 | 0.352357819 |
| cg05970547 | 4 | 0.02910643 | 0.6359426  | 0.659854693 | 0.77811658  |
| cg14460008 | 2 | 0.00211366 | 0.54542788 | 0.609979214 | 0.713845356 |
| cg27327370 | 2 | 0.04601984 | 0.66899807 | 0.659903038 | 0.792726605 |
| cg04051365 | 3 | 0.00113577 | 0.26562853 | 0.400222785 | 0.55543386  |
| cg26345916 | 3 | 0.00262388 | 0.17093793 | 0.162255123 | 0.316860792 |
| cg27423739 | 3 | 0.00149088 | 0.18895496 | 0.196819307 | 0.366809463 |
| cg00271177 | 3 | 0.00181052 | 0.17611697 | 0.175545924 | 0.352696225 |
| cg00209623 | 3 | 0.00085205 | 0.31675491 | 0.339351116 | 0.473690578 |
| cg23003225 | 3 | 0.02944061 | 0.50285126 | 0.487395533 | 0.631339315 |
| cg04485482 | 3 | 0.02126887 | 0.47048842 | 0.503316856 | 0.643166485 |
| cg20074526 | 3 | 0.01100502 | 0.16611056 | 0.168647382 | 0.302617556 |
| cg15578332 | 3 | 0.02979258 | 0.25507297 | 0.245652923 | 0.375414839 |
| cg18229092 | 2 | 0.00654696 | 0.66261216 | 0.651294041 | 0.771047191 |
| cg09197279 | 2 | 0.00303201 | 0.2619193  | 0.274698523 | 0.440092752 |
| cg18558476 | 3 | 0.00331301 | 0.34247721 | 0.469415035 | 0.603580578 |
| cg26853787 | 2 | 0.00702941 | 0.27075098 | 0.317872401 | 0.485004561 |
| cg09155881 | 2 | 0.00297078 | 0.16213317 | 0.182404474 | 0.287690044 |
| cg11719784 | 1 | 0.00213077 | 0.57709151 | 0.621589523 | 0.723734219 |
| cg16516919 | 1 | 0.03453375 | 0.27875259 | 0.28061694  | 0.385761557 |
| cg15824962 | 1 | 0.00368022 | 0.15907524 | 0.197889121 | 0.413351148 |
| cg22218806 | 1 | 0.0126518  | 0.20688772 | 0.235682327 | 0.349523646 |
| cg13235761 | 1 | 0.00077582 | 0.13841733 | 0.18473719  | 0.330063647 |
| cg18378955 | 1 | 0.04407901 | 0.23457739 | 0.238367592 | 0.393939221 |
| cg15765889 | 2 | 0.0094452  | 0.26244186 | 0.228235757 | 0.421754535 |
| cg19990373 | 2 | 0.0042395  | 0.25139823 | 0.235290438 | 0.45196302  |
| cg20817822 | 1 | 0.00168532 | 0.67980314 | 0.670727698 | 0.779986768 |
| cg18011188 | 2 | 0.0157632  | 0.41529752 | 0.465859608 | 0.585249461 |
| cg12277870 | 1 | 0.04320918 | 0.3306143  | 0.296907671 | 0.436435345 |
| cg09937500 | 2 | 0.00679225 | 0.15131642 | 0.15150455  | 0.291723633 |
| cg02059896 | 2 | 0.01580038 | 0.61133351 | 0.626536784 | 0.736086836 |
| cg06653292 | 2 | 0.00195    | 0.51286713 | 0.508211058 | 0.731070771 |
| cg16976599 | 2 | 0.00279442 | 0.41349852 | 0.530314584 | 0.659188396 |

|            |   |            |            |             |             |
|------------|---|------------|------------|-------------|-------------|
| cg00506297 | 1 | 0.02735855 | 0.56403167 | 0.583316347 | 0.700761975 |
| cg10717691 | 1 | 0.00073118 | 0.14273434 | 0.249784278 | 0.389689597 |
| cg26197530 | 1 | 0.03659438 | 0.19408635 | 0.180673776 | 0.297816617 |
| cg06123700 | 1 | 0.01457962 | 0.22869908 | 0.220742059 | 0.365543398 |
| cg01081168 | 1 | 0.03306333 | 0.24611058 | 0.245936585 | 0.421759393 |
| cg24296187 | 1 | 0.00333331 | 0.15682144 | 0.161166725 | 0.313119127 |
| cg22761483 | 2 | 0.04407901 | 0.42038622 | 0.4086471   | 0.558824018 |
| cg00760938 | 2 | 0.00338706 | 0.49798115 | 0.516902923 | 0.622990414 |
| cg19907293 | 2 | 0.00101775 | 0.33718157 | 0.396697902 | 0.620914916 |
| cg06271720 | 2 | 0.01110735 | 0.17649621 | 0.199057197 | 0.373969699 |
| cg06453241 | 2 | 0.00445086 | 0.18255955 | 0.163747724 | 0.339383218 |
| cg01089914 | 2 | 0.01488167 | 0.32703567 | 0.287400287 | 0.434618132 |
| cg05783384 | 2 | 0.00809353 | 0.2721903  | 0.244425759 | 0.385920676 |
| cg25464265 | 1 | 0.00262147 | 0.33050604 | 0.349502944 | 0.605155019 |
| cg15730491 | 1 | 0.00137973 | 0.16777882 | 0.152551253 | 0.273574703 |
| cg25001102 | 1 | 0.0074197  | 0.47175006 | 0.448343664 | 0.585879651 |
| cg26047066 | 1 | 0.00691903 | 0.39309454 | 0.355925661 | 0.53011789  |
| cg17969662 | 1 | 0.00099274 | 0.43720512 | 0.514308323 | 0.681390483 |
| cg12804063 | 1 | 0.01268304 | 0.2237788  | 0.279765007 | 0.380825427 |
| cg14380474 | 1 | 0.00485228 | 0.45770117 | 0.503908522 | 0.684251389 |
| cg03970900 | 1 | 0.00403328 | 0.16511345 | 0.167214311 | 0.322283708 |
| cg05998301 | 2 | 0.00352201 | 0.38027331 | 0.439649802 | 0.59051158  |
| cg25552018 | 1 | 0.00368022 | 0.32829997 | 0.404535614 | 0.55208642  |
| cg06193628 | 2 | 0.00590505 | 0.32397153 | 0.337458772 | 0.496463159 |
| cg21663666 | 2 | 0.00519569 | 0.21307494 | 0.21471692  | 0.332305349 |
| cg22374586 | 2 | 0.0048909  | 0.21108755 | 0.20809109  | 0.375669608 |
| cg09494379 | 2 | 0.00177922 | 0.27262955 | 0.293703831 | 0.41438505  |
| cg24172324 | 2 | 0.01093065 | 0.24148527 | 0.24175692  | 0.354763863 |
| cg17008160 | 1 | 0.00065949 | 0.43596908 | 0.515724082 | 0.660430303 |
| cg16685313 | 1 | 0.00187198 | 0.20470881 | 0.209414651 | 0.393172042 |
| cg22699768 | 1 | 0.01660506 | 0.34047021 | 0.327068929 | 0.553527328 |
| cg13055709 | 1 | 0.00216509 | 0.19733156 | 0.18372993  | 0.403935175 |
| cg15924102 | 1 | 0.00255682 | 0.29656968 | 0.330369438 | 0.573227453 |
| cg27584255 | 1 | 0.00945582 | 0.30872713 | 0.20254791  | 0.428961643 |
| cg26601431 | 1 | 0.00208621 | 0.29952216 | 0.245375814 | 0.526228409 |
| cg23597271 | 2 | 0.00170786 | 0.55043956 | 0.582649617 | 0.69618246  |
| cg02800216 | 2 | 0.00429569 | 0.33795633 | 0.336175955 | 0.493001481 |
| cg20722637 | 2 | 0.00166476 | 0.71494102 | 0.729669918 | 0.850021955 |
| cg15065627 | 2 | 0.01050457 | 0.26328242 | 0.222029315 | 0.403179587 |
| cg09326079 | 2 | 0.00456818 | 0.29473683 | 0.325553948 | 0.525235835 |
| cg17263013 | 2 | 0.0122155  | 0.34672017 | 0.375924528 | 0.496800386 |
| cg08873746 | 2 | 0.00152206 | 0.51335538 | 0.514925882 | 0.692492019 |
| cg09050372 | 2 | 0.0015244  | 0.50302504 | 0.562076319 | 0.67221944  |
| cg11843673 | 2 | 0.00385922 | 0.56748335 | 0.605880883 | 0.726124162 |
| cg19821872 | 2 | 0.00189311 | 0.54692422 | 0.574055575 | 0.705930791 |
| cg20342432 | 2 | 0.00989476 | 0.45849969 | 0.493224554 | 0.615349473 |

|            |   |            |            |             |             |
|------------|---|------------|------------|-------------|-------------|
| cg13750219 | 2 | 0.00367708 | 0.56557444 | 0.582236821 | 0.697774823 |
| cg26057577 | 2 | 0.00973492 | 0.24533818 | 0.223327441 | 0.389545051 |
| cg08200420 | 2 | 0.00276502 | 0.37005069 | 0.386693551 | 0.516738694 |
| cg00459898 | 2 | 0.00667307 | 0.22037469 | 0.171550935 | 0.342424378 |
| cg03388247 | 2 | 0.00085205 | 0.53445349 | 0.566981842 | 0.693656762 |
| cg23899450 | 2 | 0.00211366 | 0.38444149 | 0.435094106 | 0.578685945 |
| cg15506703 | 2 | 0.03587201 | 0.36003585 | 0.322848855 | 0.472482408 |
| cg16016888 | 2 | 0.03452515 | 0.61317022 | 0.585473103 | 0.757164094 |
| cg13298632 | 2 | 0.01678444 | 0.71376303 | 0.690824996 | 0.868596827 |
| cg27540865 | 1 | 0.02195328 | 0.12591845 | 0.116347033 | 0.302505628 |
| cg12748499 | 1 | 0.00087274 | 0.68327215 | 0.555963737 | 0.810658561 |
| cg22036872 | 1 | 0.00349658 | 0.43709685 | 0.508473956 | 0.620344867 |
