# Supplementary material for: Differential DNA methylation and expression of inflammatory and zinc transporter genes defines subgroups of osteoarthritic hip patients
Source: PubMed Central journal article supplement (PMC4552898; doi:10.1136/annrheumdis-2014-206752), 2015-04-08
Supplement: annrheumdis-2014-206752-s9.pdf [file annrheumdis-2014-206752-s9.pdf]

**Supplementary Table 5.** GO terms enriched in genes hypomethylated in OA hip cluster 2.

P value is Bonferroni corrected.

| Term                                                      | Number of genes | P-value  |
|-----------------------------------------------------------|-----------------|----------|
| immune system process (GO:0002376)                        | 198             | 1.28E-19 |
| system development (GO:0048731)                           | 306             | 2.29E-19 |
| anatomical structure development (GO:0048856)             | 332             | 7.60E-18 |
| immune response (GO:0006955)                              | 130             | 5.76E-15 |
| cell communication (GO:0007154)                           | 361             | 6.02E-15 |
| signal transduction (GO:0007165)                          | 327             | 1.17E-13 |
| locomotion (GO:0040011)                                   | 118             | 1.55E-12 |
| defense response (GO:0006952)                             | 128             | 2.10E-11 |
| anatomical structure morphogenesis (GO:0009653)           | 175             | 5.06E-11 |
| response to stress (GO:0006950)                           | 241             | 1.12E-10 |
| protein binding (GO:0005515)                              | 523             | 1.35E-10 |
| response to external stimulus (GO:0009605)                | 154             | 1.41E-10 |
| response to organic substance (GO:0010033)                | 183             | 1.08E-09 |
| regulation of immune response (GO:0050776)                | 83              | 1.87E-09 |
| positive regulation of immune response (GO:0050778)       | 63              | 2.60E-09 |
| cellular response to chemical stimulus (GO:0070887)       | 171             | 3.35E-09 |
| innate immune response (GO:0045087)                       | 87              | 3.78E-09 |
| neurogenesis (GO:0022008)                                 | 123             | 5.01E-09 |
| regulation of immune system process (GO:0002682)          | 110             | 7.36E-09 |
| regulation of cell communication (GO:0010646)             | 206             | 8.17E-09 |
| positive regulation of immune system process (GO:0002684) | 80              | 1.27E-08 |
| generation of neurons (GO:0048699)                        | 115             | 4.39E-08 |
| chemotaxis (GO:0006935)                                   | 69              | 4.85E-08 |
| regulation of signaling (GO:0023051)                      | 202             | 6.26E-08 |
| localization of cell (GO:0051674)                         | 80              | 8.92E-08 |
| cell motility (GO:0048870)                                | 80              | 8.92E-08 |
| cell migration (GO:0016477)                               | 75              | 1.08E-07 |
| localization (GO:0051179)                                 | 294             | 5.26E-07 |
| regulation of signal transduction (GO:0009966)            | 179             | 1.95E-06 |
| cellular response to endogenous stimulus (GO:0071495)     | 86              | 2.74E-06 |
| response to oxygen-containing compound (GO:1901700)       | 104             | 3.15E-06 |
| regulation of hydrolase activity (GO:0051336)             | 105             | 4.06E-06 |
| cell activation (GO:0001775)                              | 66              | 4.19E-06 |
| extracellular matrix organization (GO:0030198)            | 46              | 6.65E-06 |
| activation of immune response (GO:0002253)                | 45              | 1.04E-05 |
| immune system development (GO:0002520)                    | 62              | 1.18E-05 |
| neuron differentiation (GO:0030182)                       | 86              | 1.23E-05 |
| neuron development (GO:0048666)                           | 74              | 1.86E-05 |
| hematopoietic or lymphoid organ development (GO:0048534)  | 59              | 2.49E-05 |
| immune response-regulating signaling pathway (GO:0002764) | 48              | 4.94E-05 |
| ion binding (GO:0043167)                                  | 361             | 4.97E-05 |
| receptor activity (GO:0004872)                            | 118             | 8.07E-05 |

|                                                                |     |          |
|----------------------------------------------------------------|-----|----------|
| neuron projection development (GO:0031175)                     | 63  | 8.46E-05 |
| regulation of biological quality (GO:0065008)                  | 192 | 1.01E-04 |
| positive regulation of phosphorus metabolic process (GO:0010   | 109 | 1.09E-04 |
| positive regulation of phosphate metabolic process (GO:00459   | 109 | 1.09E-04 |
| neuron projection morphogenesis (GO:0048812)                   | 55  | 1.30E-04 |
| positive regulation of cell communication (GO:0010647)         | 103 | 1.54E-04 |
| cell-cell signaling (GO:0007267)                               | 82  | 1.97E-04 |
| intracellular signal transduction (GO:0035556)                 | 119 | 2.04E-04 |
| axon development (GO:0061564)                                  | 52  | 2.14E-04 |
| response to other organism (GO:0051707)                        | 63  | 2.26E-04 |
| response to external biotic stimulus (GO:0043207)              | 63  | 2.26E-04 |
| response to biotic stimulus (GO:0009607)                       | 65  | 2.29E-04 |
| axon guidance (GO:0007411)                                     | 43  | 2.39E-04 |
| neuron projection guidance (GO:0097485)                        | 43  | 2.39E-04 |
| positive regulation of hydrolase activity (GO:0051345)         | 75  | 2.41E-04 |
| signal transducer activity (GO:0004871)                        | 120 | 3.25E-04 |
| molecular transducer activity (GO:0060089)                     | 120 | 3.25E-04 |
| axonogenesis (GO:0007409)                                      | 50  | 3.36E-04 |
| immune response-regulating cell surface receptor signaling pai | 38  | 3.40E-04 |
| positive regulation of lymphocyte activation (GO:0051251)      | 32  | 3.41E-04 |
| positive regulation of defense response (GO:0031349)           | 35  | 3.42E-04 |
| response to bacterium (GO:0009617)                             | 45  | 3.85E-04 |
| mRNA metabolic process (GO:0016071)                            | 7   | 4.47E-04 |
| cellular response to oxygen-containing compound (GO:190170     | 68  | 5.13E-04 |
| actin binding (GO:0003779)                                     | 42  | 5.30E-04 |
| regulation of leukocyte activation (GO:0002694)                | 43  | 5.58E-04 |
| positive regulation of T cell activation (GO:0050870)          | 27  | 5.91E-04 |
| hemopoiesis (GO:0030097)                                       | 52  | 5.97E-04 |
| positive regulation of leukocyte activation (GO:0002696)       | 33  | 6.40E-04 |
| immune response-activating signal transduction (GO:0002757)    | 37  | 7.19E-04 |
| positive regulation of immune effector process (GO:0002699)    | 22  | 7.41E-04 |
| defense response to other organism (GO:0098542)                | 39  | 7.46E-04 |
| positive regulation of signaling (GO:0023056)                  | 100 | 7.47E-04 |
| regulation of defense response (GO:0031347)                    | 52  | 1.06E-03 |
| blood vessel development (GO:0001568)                          | 46  | 1.20E-03 |
| leukocyte activation (GO:0045321)                              | 43  | 1.25E-03 |
| cell projection morphogenesis (GO:0048858)                     | 63  | 1.40E-03 |
| cell morphogenesis involved in neuron differentiation (GO:004  | 51  | 1.41E-03 |
| regulation of immune effector process (GO:0002697)             | 33  | 1.48E-03 |
| organ morphogenesis (GO:0009887)                               | 74  | 1.70E-03 |
| cell projection organization (GO:0030030)                      | 78  | 1.80E-03 |
| regulation of interleukin-1 beta production (GO:0032651)       | 11  | 2.35E-03 |
| regulation of cytokine production (GO:0001817)                 | 48  | 3.14E-03 |
| cell part morphogenesis (GO:0032990)                           | 63  | 3.24E-03 |
| regulation of cell proliferation (GO:0042127)                  | 104 | 3.32E-03 |
| vasculature development (GO:0001944)                           | 47  | 3.33E-03 |

|                                                                |     |          |
|----------------------------------------------------------------|-----|----------|
| proteoglycan biosynthetic process (GO:0030166)                 | 13  | 3.40E-03 |
| mRNA processing (GO:0006397)                                   | 3   | 3.51E-03 |
| regulation of apoptotic process (GO:0042981)                   | 100 | 3.60E-03 |
| cytoskeletal protein binding (GO:0008092)                      | 65  | 3.76E-03 |
| immune effector process (GO:0002252)                           | 43  | 3.87E-03 |
| positive regulation of cytokine production (GO:0001819)        | 37  | 4.11E-03 |
| negative regulation of immune system process (GO:0002683)      | 35  | 4.17E-03 |
| cytokine production (GO:0001816)                               | 19  | 4.45E-03 |
| response to lipopolysaccharide (GO:0032496)                    | 29  | 4.85E-03 |
| positive regulation of catabolic process (GO:0009896)          | 63  | 4.86E-03 |
| regulation of programmed cell death (GO:0043067)               | 100 | 4.98E-03 |
| positive regulation of interleukin-1 beta production (GO:00327 | 9   | 5.02E-03 |
| response to molecule of bacterial origin (GO:0002237)          | 30  | 5.54E-03 |
| response to lipid (GO:0033993)                                 | 60  | 6.11E-03 |
| positive regulation of GTP catabolic process (GO:0033126)      | 47  | 6.49E-03 |
| positive regulation of GTPase activity (GO:0043547)            | 47  | 6.49E-03 |
| regulation of interleukin-1 production (GO:0032652)            | 11  | 6.49E-03 |
| receptor binding (GO:0005102)                                  | 97  | 6.69E-03 |
| regulation of response to stress (GO:0080134)                  | 78  | 7.52E-03 |
| regulation of cell death (GO:0010941)                          | 103 | 7.62E-03 |
| cell adhesion (GO:0007155)                                     | 70  | 7.96E-03 |
| proteoglycan metabolic process (GO:0006029)                    | 17  | 7.97E-03 |
| circulatory system development (GO:0072359)                    | 65  | 8.34E-03 |
| cardiovascular system development (GO:0072358)                 | 65  | 8.34E-03 |
| regulation of GTPase activity (GO:0043087)                     | 49  | 9.06E-03 |
| positive regulation of lymphocyte mediated immunity (GO:000    | 14  | 9.09E-03 |
| cellular component organization (GO:0016043)                   | 268 | 9.88E-03 |
| positive regulation of leukocyte mediated immunity (GO:0002    | 15  | 1.01E-02 |
| antigen receptor-mediated signaling pathway (GO:0050851)       | 19  | 1.05E-02 |
| immune response-activating cell surface receptor signaling pat | 25  | 1.11E-02 |
| regulation of T cell activation (GO:0050863)                   | 30  | 1.11E-02 |
| leukocyte differentiation (GO:0002521)                         | 32  | 1.13E-02 |
| regulation of response to external stimulus (GO:0032101)       | 54  | 1.14E-02 |
| regulation of transport (GO:0051049)                           | 106 | 1.16E-02 |
| T cell costimulation (GO:0031295)                              | 14  | 1.26E-02 |
| positive regulation of interleukin-1 production (GO:0032732)   | 9   | 1.27E-02 |
| T cell activation (GO:0042110)                                 | 27  | 1.28E-02 |
| skeletal system development (GO:0001501)                       | 43  | 1.30E-02 |
| regulation of lymphocyte activation (GO:0051249)               | 36  | 1.38E-02 |
| RNA binding (GO:0003723)                                       | 42  | 1.39E-02 |
| response to interferon-gamma (GO:0034341)                      | 18  | 1.44E-02 |
| lymphocyte costimulation (GO:0031294)                          | 14  | 1.48E-02 |
| protein domain specific binding (GO:0019904)                   | 51  | 1.51E-02 |
| lymphocyte activation (GO:0046649)                             | 35  | 1.52E-02 |
| RNA splicing (GO:0008380)                                      | 2   | 1.78E-02 |
| cellular response to growth factor stimulus (GO:0071363)       | 52  | 1.80E-02 |

|                                                         |     |          |
|---------------------------------------------------------|-----|----------|
| T cell receptor signaling pathway (GO:0050852)          | 16  | 1.82E-02 |
| response to growth factor (GO:0070848)                  | 53  | 1.98E-02 |
| peptide antigen binding (GO:0042605)                    | 8   | 2.05E-02 |
| secretion (GO:0046903)                                  | 49  | 2.55E-02 |
| carbohydrate derivative binding (GO:0097367)            | 143 | 2.61E-02 |
| regulation of lymphocyte mediated immunity (GO:0002706) | 16  | 2.69E-02 |
| cell proliferation (GO:0008283)                         | 56  | 2.90E-02 |
| metal ion binding (GO:0046872)                          | 241 | 2.97E-02 |
| synaptic transmission (GO:0007268)                      | 53  | 3.09E-02 |
| cation binding (GO:0043169)                             | 244 | 3.74E-02 |
| T cell differentiation (GO:0030217)                     | 18  | 4.03E-02 |
| regulation of leukocyte mediated immunity (GO:0002703)  | 18  | 4.03E-02 |
| identical protein binding (GO:0042802)                  | 80  | 4.19E-02 |
| glycosaminoglycan biosynthetic process (GO:0006024)     | 16  | 4.98E-02 |
