# Supplementary material for: Differential DNA methylation and expression of inflammatory and zinc transporter genes defines subgroups of osteoarthritic hip patients
Source: PubMed Central journal article supplement (PMC4552898; doi:10.1136/annrheumdis-2014-206752), 2015-04-08
Supplement: annrheumdis-2014-206752-s10.pdf [file annrheumdis-2014-206752-s10.pdf]

**Supplementary Table 6.** GO terms enriched in genes hypermethylated in OA hip cluster 2.

P value is Bonferroni corrected.

| Term                                                          | Number of genes | P-value  |
|---------------------------------------------------------------|-----------------|----------|
| regulation of response to stimulus (GO:0048583)               | 303             | 9.85E-18 |
| anatomical structure development (GO:0048856)                 | 384             | 1.06E-17 |
| regulation of signal transduction (GO:0009966)                | 250             | 1.91E-17 |
| cell differentiation (GO:0030154)                             | 289             | 3.01E-16 |
| regulation of signaling (GO:0023051)                          | 267             | 3.15E-16 |
| regulation of cell communication (GO:0010646)                 | 266             | 8.20E-16 |
| anatomical structure morphogenesis (GO:0009653)               | 212             | 4.88E-14 |
| ion binding (GO:0043167)                                      | 474             | 1.24E-13 |
| localization (GO:0051179)                                     | 363             | 1.06E-10 |
| response to stimulus (GO:0050896)                             | 539             | 1.38E-10 |
| cellular component organization (GO:0016043)                  | 361             | 1.84E-10 |
| organ development (GO:0048513)                                | 244             | 3.03E-10 |
| organ morphogenesis (GO:0009887)                              | 106             | 5.98E-10 |
| cellular response to stimulus (GO:0051716)                    | 440             | 8.10E-10 |
| nervous system development (GO:0007399)                       | 190             | 8.75E-10 |
| regulation of anatomical structure morphogenesis (GO:0022603) | 97              | 1.77E-09 |
| cellular component organization or biogenesis (GO:0071840)    | 363             | 2.29E-09 |
| single organism signaling (GO:0044700)                        | 388             | 2.41E-09 |
| signaling (GO:0023052)                                        | 388             | 2.41E-09 |
| positive regulation of hydrolase activity (GO:0051345)        | 101             | 4.71E-09 |
| skeletal system development (GO:0001501)                      | 66              | 4.73E-09 |
| cell development (GO:0048468)                                 | 151             | 5.01E-09 |
| signal transduction (GO:0007165)                              | 358             | 6.47E-09 |
| cell communication (GO:0007154)                               | 391             | 8.28E-09 |
| circulatory system development (GO:0072359)                   | 94              | 9.86E-09 |
| cardiovascular system development (GO:0072358)                | 94              | 9.86E-09 |
| negative regulation of response to stimulus (GO:0048585)      | 125             | 1.32E-08 |
| negative regulation of signal transduction (GO:0009968)       | 107             | 1.44E-08 |
| tissue development (GO:0009888)                               | 153             | 3.28E-08 |
| regulation of hydrolase activity (GO:0051336)                 | 128             | 3.67E-08 |
| metal ion binding (GO:0046872)                                | 320             | 9.24E-08 |
| regulation of cell morphogenesis (GO:0022604)                 | 61              | 1.15E-07 |
| actin binding (GO:0003779)                                    | 57              | 1.23E-07 |
| positive regulation of molecular function (GO:0044093)        | 155             | 1.31E-07 |
| negative regulation of signaling (GO:0023057)                 | 111             | 2.06E-07 |
| enzyme binding (GO:0019899)                                   | 138             | 2.24E-07 |
| negative regulation of cell communication (GO:0010648)        | 111             | 2.44E-07 |
| cellular component movement (GO:0006928)                      | 131             | 3.18E-07 |
| negative regulation of Wnt signaling pathway (GO:0030178)     | 30              | 3.34E-07 |
| regulation of cellular component organization (GO:0051128)    | 162             | 4.32E-07 |
| neurogenesis (GO:0022008)                                     | 134             | 4.95E-07 |
| regulation of cell differentiation (GO:0045595)               | 131             | 6.32E-07 |

|                                                                     |     |          |
|---------------------------------------------------------------------|-----|----------|
| regulation of intracellular signal transduction (GO:1902531)        | 144 | 6.40E-07 |
| cation binding (GO:0043169)                                         | 320 | 6.58E-07 |
| positive regulation of GTPase activity (GO:0043547)                 | 65  | 6.87E-07 |
| regulation of GTPase activity (GO:0043087)                          | 68  | 8.00E-07 |
| regulation of small GTPase mediated signal transduction (GO:005005) | 65  | 1.44E-06 |
| generation of neurons (GO:0048699)                                  | 126 | 2.02E-06 |
| cell morphogenesis involved in differentiation (GO:0000904)         | 77  | 2.63E-06 |
| cell migration (GO:0016477)                                         | 81  | 3.17E-06 |
| heart morphogenesis (GO:0003007)                                    | 37  | 3.78E-06 |
| localization of cell (GO:0051674)                                   | 86  | 4.36E-06 |
| cell motility (GO:0048870)                                          | 86  | 4.36E-06 |
| regulation of Wnt signaling pathway (GO:0030111)                    | 38  | 5.29E-06 |
| regulation of Ras protein signal transduction (GO:0046578)          | 57  | 7.40E-06 |
| locomotion (GO:0040011)                                             | 113 | 7.71E-06 |
| neuron projection development (GO:0031175)                          | 75  | 8.52E-06 |
| ATP binding (GO:0005524)                                            | 136 | 9.68E-06 |
| regulation of catalytic activity (GO:0050790)                       | 182 | 1.02E-05 |
| carbohydrate derivative binding (GO:0097367)                        | 186 | 1.37E-05 |
| positive regulation of catalytic activity (GO:0043085)              | 130 | 1.38E-05 |
| tube development (GO:0035295)                                       | 77  | 1.55E-05 |
| blood vessel morphogenesis (GO:0048514)                             | 51  | 1.90E-05 |
| nucleotide binding (GO:0000166)                                     | 194 | 1.90E-05 |
| nucleoside phosphate binding (GO:1901265)                           | 194 | 1.96E-05 |
| adenyl ribonucleotide binding (GO:0032559)                          | 137 | 2.27E-05 |
| cell projection organization (GO:0030030)                           | 97  | 2.32E-05 |
| heart development (GO:0007507)                                      | 56  | 2.33E-05 |
| intracellular signal transduction (GO:0035556)                      | 142 | 2.39E-05 |
| sensory perception of smell (GO:0007608)                            | 2   | 2.48E-05 |
| kinase activity (GO:0016301)                                        | 83  | 2.54E-05 |
| regulation of Ras GTPase activity (GO:0032318)                      | 49  | 2.56E-05 |
| adenyl nucleotide binding (GO:0030554)                              | 138 | 2.57E-05 |
| embryo development (GO:0009790)                                     | 98  | 2.61E-05 |
| tissue morphogenesis (GO:0048729)                                   | 67  | 2.66E-05 |
| small molecule binding (GO:0036094)                                 | 212 | 2.87E-05 |
| phosphotransferase activity, alcohol group as acceptor (GO:0016070) | 77  | 5.10E-05 |
| sensory perception of chemical stimulus (GO:0007606)                | 4   | 5.35E-05 |
| embryo development ending in birth or egg hatching (GO:0009799)     | 71  | 5.40E-05 |
| protein domain specific binding (GO:0019904)                        | 67  | 5.42E-05 |
| purine ribonucleoside binding (GO:0032550)                          | 157 | 5.88E-05 |
| blood vessel development (GO:0001568)                               | 56  | 6.41E-05 |
| purine nucleoside binding (GO:0001883)                              | 157 | 6.52E-05 |
| ribonucleoside binding (GO:0032549)                                 | 157 | 6.74E-05 |
| purine ribonucleoside triphosphate binding (GO:0035639)             | 156 | 7.00E-05 |
| GTPase binding (GO:0051020)                                         | 35  | 7.53E-05 |
| epithelial tube morphogenesis (GO:0060562)                          | 44  | 7.59E-05 |
| chordate embryonic development (GO:0043009)                         | 70  | 7.87E-05 |

|                                                                    |     |          |
|--------------------------------------------------------------------|-----|----------|
| cell morphogenesis (GO:0000902)                                    | 91  | 8.97E-05 |
| nucleoside binding (GO:0001882)                                    | 157 | 9.45E-05 |
| neuron projection morphogenesis (GO:0048812)                       | 63  | 1.02E-04 |
| regulation of biological quality (GO:0065008)                      | 224 | 1.08E-04 |
| vasculature development (GO:0001944)                               | 58  | 1.17E-04 |
| morphogenesis of an epithelium (GO:0002009)                        | 54  | 1.23E-04 |
| purine nucleotide binding (GO:0017076)                             | 159 | 1.26E-04 |
| connective tissue development (GO:0061448)                         | 33  | 1.29E-04 |
| neuron differentiation (GO:0030182)                                | 95  | 1.33E-04 |
| Wnt signaling pathway (GO:0016055)                                 | 37  | 1.70E-04 |
| purine ribonucleotide binding (GO:0032555)                         | 157 | 1.71E-04 |
| protein phosphorylation (GO:0006468)                               | 75  | 1.74E-04 |
| positive regulation of Ras GTPase activity (GO:0032320)            | 42  | 1.75E-04 |
| small GTPase binding (GO:0031267)                                  | 33  | 1.76E-04 |
| neuron development (GO:0048666)                                    | 81  | 2.34E-04 |
| extracellular matrix organization (GO:0030198)                     | 48  | 2.48E-04 |
| positive regulation of cell differentiation (GO:0045597)           | 75  | 2.59E-04 |
| extracellular structure organization (GO:0043062)                  | 48  | 2.69E-04 |
| ribonucleotide binding (GO:0032553)                                | 157 | 2.78E-04 |
| angiogenesis (GO:0001525)                                          | 41  | 2.92E-04 |
| cytoskeleton organization (GO:0007010)                             | 79  | 2.92E-04 |
| actin cytoskeleton organization (GO:0030036)                       | 48  | 3.41E-04 |
| nucleoside-triphosphatase regulator activity (GO:0060589)          | 43  | 3.64E-04 |
| guanyl-nucleotide exchange factor activity (GO:0005085)            | 31  | 3.70E-04 |
| GTPase regulator activity (GO:0030695)                             | 41  | 4.31E-04 |
| small GTPase regulator activity (GO:0005083)                       | 30  | 4.57E-04 |
| regulation of localization (GO:0032879)                            | 164 | 5.10E-04 |
| detection of chemical stimulus (GO:0009593)                        | 5   | 5.28E-04 |
| catalytic activity (GO:0003824)                                    | 386 | 7.56E-04 |
| transferase activity, transferring phosphorus-containing groups (i | 89  | 7.78E-04 |
| vesicle-mediated transport (GO:0016192)                            | 99  | 7.87E-04 |
| cellular component morphogenesis (GO:0032989)                      | 93  | 7.91E-04 |
| regulation of ossification (GO:0030278)                            | 29  | 7.93E-04 |
| epithelium development (GO:0060429)                                | 94  | 8.23E-04 |
| cell morphogenesis involved in neuron differentiation (GO:00486    | 59  | 8.37E-04 |
| cellular localization (GO:0051641)                                 | 163 | 8.82E-04 |
| gland development (GO:0048732)                                     | 48  | 9.88E-04 |
| glycosaminoglycan biosynthetic process (GO:0006024)                | 21  | 9.91E-04 |
| actin filament binding (GO:0051015)                                | 20  | 1.08E-03 |
| tube morphogenesis (GO:0035239)                                    | 54  | 1.10E-03 |
| phosphorylation (GO:0016310)                                       | 99  | 1.16E-03 |
| aminoglycan biosynthetic process (GO:0006023)                      | 21  | 1.16E-03 |
| protein kinase activity (GO:0004672)                               | 64  | 1.28E-03 |
| heterocyclic compound binding (GO:1901363)                         | 401 | 1.77E-03 |
| growth (GO:0040007)                                                | 47  | 1.96E-03 |
| regulation of cellular component biogenesis (GO:0044087)           | 58  | 1.99E-03 |

|                                                                          |     |          |
|--------------------------------------------------------------------------|-----|----------|
| proteoglycan metabolic process (GO:0006029)                              | 20  | 2.02E-03 |
| Ras GTPase binding (GO:0017016)                                          | 29  | 2.16E-03 |
| establishment of localization (GO:0051234)                               | 271 | 2.77E-03 |
| negative regulation of ossification (GO:0030279)                         | 16  | 3.08E-03 |
| organic cyclic compound binding (GO:0097159)                             | 403 | 3.32E-03 |
| ossification (GO:0001503)                                                | 35  | 3.53E-03 |
| mesenchyme development (GO:0060485)                                      | 27  | 3.68E-03 |
| circadian regulation of gene expression (GO:0032922)                     | 14  | 3.71E-03 |
| negative regulation of canonical Wnt signaling pathway (GO:0090000)      | 19  | 4.11E-03 |
| regulation of nervous system development (GO:0051960)                    | 62  | 4.20E-03 |
| regulation of cell development (GO:0060284)                              | 69  | 4.21E-03 |
| negative regulation of gene expression (GO:0010629)                      | 125 | 4.65E-03 |
| transport (GO:0006810)                                                   | 264 | 4.67E-03 |
| protein complex binding (GO:0032403)                                     | 78  | 4.68E-03 |
| cartilage development (GO:0051216)                                       | 25  | 6.15E-03 |
| GTPase activator activity (GO:0005096)                                   | 34  | 6.27E-03 |
| cell projection morphogenesis (GO:0048858)                               | 70  | 6.35E-03 |
| regulation of cell shape (GO:0008360)                                    | 21  | 6.70E-03 |
| glycosaminoglycan metabolic process (GO:0030203)                         | 26  | 7.02E-03 |
| mucopolysaccharide metabolic process (GO:1903510)                        | 22  | 7.44E-03 |
| in utero embryonic development (GO:0001701)                              | 44  | 7.77E-03 |
| single-organism localization (GO:1902578)                                | 230 | 8.01E-03 |
| embryonic morphogenesis (GO:0048598)                                     | 59  | 9.17E-03 |
| developmental growth (GO:0048589)                                        | 30  | 1.06E-02 |
| negative regulation of transcription, DNA-templated (GO:004589)          | 89  | 1.07E-02 |
| axon development (GO:0061564)                                            | 54  | 1.08E-02 |
| Ras guanyl-nucleotide exchange factor activity (GO:0005088)              | 21  | 1.10E-02 |
| skeletal system morphogenesis (GO:0048705)                               | 30  | 1.16E-02 |
| regulation of gene expression (GO:0010468)                               | 300 | 1.28E-02 |
| calcium ion binding (GO:0005509)                                         | 67  | 1.34E-02 |
| sensory organ development (GO:0007423)                                   | 54  | 1.35E-02 |
| axonogenesis (GO:0007409)                                                | 52  | 1.40E-02 |
| regulation of neurogenesis (GO:0050767)                                  | 55  | 1.65E-02 |
| positive regulation of gene expression (GO:0010628)                      | 120 | 1.76E-02 |
| aminoglycan metabolic process (GO:0006022)                               | 26  | 1.80E-02 |
| chondroitin sulfate metabolic process (GO:0030204)                       | 14  | 1.94E-02 |
| regulation of canonical Wnt signaling pathway (GO:0060828)               | 24  | 2.04E-02 |
| negative regulation of nucleic acid-templated transcription (GO:0000000) | 90  | 2.12E-02 |
| cellular response to endogenous stimulus (GO:0071495)                    | 84  | 2.15E-02 |
| response to stress (GO:0006950)                                          | 235 | 2.62E-02 |
| regulation of osteoblast differentiation (GO:0045667)                    | 19  | 2.64E-02 |
| mesenchymal cell development (GO:0014031)                                | 19  | 2.64E-02 |
| cardiac chamber morphogenesis (GO:0003206)                               | 19  | 2.64E-02 |
| establishment of cell polarity (GO:0030010)                              | 15  | 2.72E-02 |
| proteoglycan biosynthetic process (GO:0030166)                           | 13  | 2.73E-02 |
| cellular response to growth factor stimulus (GO:0071363)                 | 59  | 3.02E-02 |

|                                                                          |     |          |
|--------------------------------------------------------------------------|-----|----------|
| cardiac chamber development (GO:0003205)                                 | 21  | 3.02E-02 |
| regulation of Rho GTPase activity (GO:0032319)                           | 26  | 3.23E-02 |
| nephron development (GO:0072006)                                         | 20  | 3.24E-02 |
| regulation of locomotion (GO:0040012)                                    | 62  | 3.25E-02 |
| chondroitin sulfate proteoglycan metabolic process (GO:0050654)          | 14  | 3.35E-02 |
| urogenital system development (GO:0001655)                               | 36  | 3.50E-02 |
| regulation of transcription from RNA polymerase II promoter (GO:0007122) | 126 | 3.84E-02 |
| morphogenesis of a branching epithelium (GO:0061138)                     | 26  | 3.90E-02 |
| establishment or maintenance of cell polarity (GO:0007163)               | 20  | 4.12E-02 |
| regulation of Rho protein signal transduction (GO:0035023)               | 28  | 4.16E-02 |
| carbohydrate derivative biosynthetic process (GO:1901137)                | 58  | 4.22E-02 |
| transcription regulatory region DNA binding (GO:0044212)                 | 53  | 4.29E-02 |
| SH3 domain binding (GO:0017124)                                          | 19  | 4.50E-02 |
| positive regulation of nervous system development (GO:0051962)           | 38  | 4.54E-02 |
| embryonic organ development (GO:0048568)                                 | 46  | 4.55E-02 |
| regulation of osteoblast proliferation (GO:0033688)                      | 8   | 4.67E-02 |
| regulation of myotube differentiation (GO:0010830)                       | 13  | 4.84E-02 |
| sensory organ morphogenesis (GO:0090596)                                 | 32  | 4.87E-02 |
| stem cell development (GO:0048864)                                       | 28  | 4.94E-02 |
| regulation of cell adhesion (GO:0030155)                                 | 40  | 4.97E-02 |
