# Supplementary material for: Differential DNA methylation and expression of inflammatory and zinc transporter genes defines subgroups of osteoarthritic hip patients
Source: PubMed Central journal article supplement (PMC4552898; doi:10.1136/annrheumdis-2014-206752), 2015-04-08
Supplement: annrheumdis-2014-206752-s11.pdf [file annrheumdis-2014-206752-s11.pdf]

**Supplementary Table 7.** Details of the differentially methylated probes identified within inflammation associated genes. TSS1500 are probes that are located within 1500 bp upstream of the start codon; TSS200 probes located within 200 bp upstream of the start codon; 1<sup>st</sup> exon are probes located within the 1<sup>st</sup> exon of the gene and body are probes located within the gene body.

| Gene         | CpG probe ID | Chr. | Location  | Region               | Mean $\beta$ value NOF | Mean $\beta$ value OA hip cluster 1 | Mean $\beta$ value OA hip cluster 2 | Benjamini-Hochberg p value |
|--------------|--------------|------|-----------|----------------------|------------------------|-------------------------------------|-------------------------------------|----------------------------|
| <i>TNF</i>   | cg21370522   | 6    | 31543219  | TSS200               | 0.59                   | 0.64                                | 0.47                                | 0.02                       |
|              | cg01569083   |      | 31543289  | TSS200               | 0.56                   | 0.58                                | 0.46                                | 0.03                       |
|              | cg03037030   |      | 31543300  | TSS200               | 0.44                   | 0.46                                | 0.27                                | 0.01                       |
|              | cg12681001   |      | 31543540  | 1 <sup>st</sup> Exon | 0.47                   | 0.50                                | 0.37                                | 0.02                       |
|              | cg21222743   |      | 31543545  | 1 <sup>st</sup> Exon | 0.33                   | 0.37                                | 0.26                                | 0.005                      |
|              | cg10717214   |      | 31543557  | 1 <sup>st</sup> Exon | 0.45                   | 0.46                                | 0.37                                | 0.04                       |
| <i>IL6</i>   | cg00087425   | 7    | 22766829  | 1 <sup>st</sup> Exon | 0.19                   | 0.19                                | 0.10                                | 0.003                      |
|              | cg13104385   |      | 22767384  | Body                 | 0.69                   | 0.71                                | 0.60                                | 0.04                       |
|              | cg05265849   |      | 22767390  | Body                 | 0.36                   | 0.36                                | 0.25                                | 0.03                       |
|              | cg07998387   |      | 22767571  | Body                 | 0.43                   | 0.44                                | 0.58                                | 0.005                      |
| <i>CXCR2</i> | cg25941354   | 2    | 218989983 | TSS1500              | 0.58                   | 0.61                                | 0.48                                | 0.02                       |
|              | cg10591797   |      | 218990598 | TSS200               | 0.73                   | 0.76                                | 0.65                                | 0.02                       |
|              | cg13739417   |      | 218990627 | TSS200               | 0.64                   | 0.70                                | 0.58                                | 0.04                       |
| <i>CCL5</i>  | cg02483931   | 17   | 34202461  | Body                 | 0.45                   | 0.44                                | 0.31                                | 0.005                      |
|              | cg08656816   |      | 34207454  | TSS200               | 0.47                   | 0.38                                | 0.22                                | 0.0008                     |
| <i>CCL2</i>  | cg17864156   | 17   | 32582828  | Body                 | 0.44                   | 0.44                                | 0.32                                | 0.01                       |
| <i>IL1A</i>  | cg00839584   | 2    | 113542091 | 1 <sup>st</sup> Exon | 0.55                   | 0.58                                | 0.45                                | 0.04                       |
