# Supplementary material for: Differential DNA methylation and expression of inflammatory and zinc transporter genes defines subgroups of osteoarthritic hip patients
Source: PubMed Central journal article supplement (PMC4552898; doi:10.1136/annrheumdis-2014-206752), 2015-04-08
Supplement: annrheumdis-2014-206752-s12.pdf [file annrheumdis-2014-206752-s12.pdf]

**Supplementary Table 8.** Correlation between gene expression and methylation at the promoters of selected inflammation associated genes. The results are also shown for all of the probes in each gene combined. In the case of *IL6*, the three probes that showed a negative correlation with gene expression (cg00087425, cg13104385 and cg05265849) were combined. Scatter plots of the correlations below are shown in Supplementary Figure 1 and Supplementary Figure 2.

| <b>Gene</b>  | <b>CpG probe ID</b> | <b>Spearman correlation</b> | <b>p value</b> |
|--------------|---------------------|-----------------------------|----------------|
| <i>TNF</i>   | cg21370522          | -0.44                       | 0.088          |
|              | cg01569083          | -0.37                       | 0.16           |
|              | cg03037030          | -0.38                       | 0.15           |
|              | cg12681001          | -0.48                       | 0.06           |
|              | cg21222743          | -0.44                       | 0.088          |
|              | cg10717214          | -0.61                       | 0.012          |
|              | Combined            | -0.61                       | 0.012          |
| <i>IL6</i>   | cg00087425          | -0.41                       | 0.11           |
|              | cg13104385          | -0.56                       | 0.024          |
|              | cg05265849          | -0.57                       | 0.021          |
|              | cg07998387          | 0.16                        | 0.55           |
|              | Combined            | -0.55                       | 0.027          |
| <i>CXCR2</i> | cg25941354          | -0.38                       | 0.15           |
|              | cg10591797          | -0.4                        | 0.12           |
|              | cg13739417          | -0.38                       | 0.15           |
|              | Combined            | -0.5                        | 0.049          |
| <i>CCL5</i>  | cg02483931          | -0.68                       | 0.0038         |
|              | cg08656816          | -0.65                       | 0.0064         |
|              | Combined            | -0.69                       | 0.0031         |
| <i>CCL2</i>  | cg17864156          | -0.62                       | 0.01           |
| <i>IL1A</i>  | cg00839584          | -0.58                       | 0.034          |
