# Supplementary material for: Differential DNA methylation and expression of inflammatory and zinc transporter genes defines subgroups of osteoarthritic hip patients
Source: PubMed Central journal article supplement (PMC4552898; doi:10.1136/annrheumdis-2014-206752), 2015-04-08
Supplement: annrheumdis-2014-206752-s13.pdf [file annrheumdis-2014-206752-s13.pdf]

**Supplementary Table 9.** Details of the differentially methylated probes identified within zinc transporter genes. The methylation differences at cg02362439 were genome-wide significant, however there was not a 10% difference in methylation between NOF and OA hip cluster 2.

| Gene         | CpG probe ID | Chr. | Location  | Region | Mean $\beta$ value NOF | Mean $\beta$ value OA hip cluster 1 | Mean $\beta$ value OA hip cluster 2 | Benjamini-Hochberg p value |
|--------------|--------------|------|-----------|--------|------------------------|-------------------------------------|-------------------------------------|----------------------------|
| <i>ZIP4</i>  | cg22059438   | 8    | 145641882 | Body   | 0.36                   | 0.34                                | 0.46                                | 0.03                       |
| <i>ZIP7</i>  | cg26750489   | 6    | 33171106  | Body   | 0.59                   | 0.54                                | 0.76                                | 0.002                      |
|              | cg25059165   |      | 33171467  | Body   | 0.34                   | 0.32                                | 0.50                                | 0.003                      |
|              | cg02362439   |      | 33171324  | Body   | 0.63                   | 0.59                                | 0.72                                | 0.006                      |
| <i>ZIP11</i> | cg25067702   | 17   | 70723227  | Body   | 0.37                   | 0.38                                | 0.24                                | 0.008                      |
|              | cg11761483   |      | 70723386  | Body   | 0.58                   | 0.64                                | 0.47                                | 0.04                       |
|              | cg21461745   |      | 70948937  | Body   | 0.39                   | 0.47                                | 0.63                                | 0.004                      |
| <i>ZIP14</i> | cg24136932   | 8    | 22281979  | Body   | 0.44                   | 0.52                                | 0.64                                | 0.006                      |
